# Supplementary material for: Long-term responses of microbial plankton to ocean warming reveal shifts in air–sea CO₂ exchange in the late 21st century
Source: Research Square preprint supplement (doi:10.21203/rs.3.rs-7284245/v1), 2025-08-12
Supplement: Supplementary file 1 [file 0fa94c744f4ccf727a7aedc6.xlsx]

## Sheet: global_dataset
REFERENCES	LAT	LONG	Ocean Base	Sample depth [m]	Layer	Heterotrophic bacteria		Autotrophic picoplankton		Total picoplankton (HB + AP)		Ratio AP:HB		Environmental data
						abundance (cells.mL-1)	carbon biomass µgC L-1	abundance (cells.mL-1)	carbon biomass µgC L-1	abundance (cells.mL-1)	carbon biomass µgC L-1	abundance	carbon biomass	Temperature (°C)	Salinity (PSU)	NO3 (µM)	NO2 (µM)	PO4 (µM)	Si (µM)
Ribeiro et al. (2016)a	-27.4	-44.7	South Atlantic Ocean	5	surface	944895	18.8979	184417	8.86392	1129312	27.7618	0.195172	0.469043	22	36.4	0.2	-	0.16	-
Ribeiro et al. (2016)a	-27.4	-44.7	South Atlantic Ocean	30	epipelagic	928357	18.5671	195187	9.19065	1123544	27.7578	0.21025	0.494996	21.6	36.4	0.22	-	0.16	-
Ribeiro et al. (2016)a	-27.4	-44.7	South Atlantic Ocean	80	epipelagic	745237	14.9047	275284	12.8172	1020521	27.722	0.369391	0.859944	20	36.2	0.2	-	0.12	-
Ribeiro et al. (2016)a	-26.8	-45.3	South Atlantic Ocean	5	surface	862294	17.2459	98906	15.5365	961200	32.7824	0.114701	0.900881	22.9	35.8	0.18	-	0.29	-
Ribeiro et al. (2016)a	-26.8	-45.3	South Atlantic Ocean	70	epipelagic	710229	14.2046	120083	14.6603	830312	28.8649	0.169076	1.03208	22.2	36.2	0.2	-	0.29	-
Ribeiro et al. (2016)a	-26.3	-45.4	South Atlantic Ocean	5	surface	845639	16.9128	81158	10.7619	926797	27.6747	0.0959724	0.63632	23.6	36.3	0.41	-	0.29	-
Ribeiro et al. (2016)a	-26.3	-45.4	South Atlantic Ocean	70	epipelagic	659083	13.1817	180185	14.0132	839268	27.1949	0.273387	1.06308	22.8	36.2	0.18	-	0.29	-
Ribeiro et al. (2016)a	-26.2	-45.5	South Atlantic Ocean	5	surface	647815	12.9563	116523	10.009	764338	22.9653	0.179871	0.772518	23.8	36.3	0.28	-	0.29	-
Ribeiro et al. (2016)a	-26.2	-45.5	South Atlantic Ocean	70	epipelagic	663889	13.2778	173574	12.29	837463	25.5678	0.26145	0.925605	22.7	36.3	0.24	-	0.29	-
Ribeiro et al. (2016)a	-26	-45.6	South Atlantic Ocean	5	surface	705995	14.1199	152569	16.4145	858564	30.5344	0.216105	1.16251	23.3	36.2	0.34	-	0.29	-
Ribeiro et al. (2016)a	-26	-45.6	South Atlantic Ocean	30	epipelagic	735861	14.7172	159366	18.0276	895227	32.7448	0.216571	1.22493	23	36.1	0.16	-	0.29	-
Ribeiro et al. (2016)a	-26	-45.6	South Atlantic Ocean	70	epipelagic	674991	13.4998	102333	5.13067	777324	18.6305	0.151606	0.380055	22.5	36.6	0.29	-	0.34	-
Ribeiro et al. (2016)a	-26	-45.6	South Atlantic Ocean	95	epipelagic	511857	10.2371	8528	0.399587	520385	10.6367	0.0166609	0.0390331	18.8	36.1	5.31	-	0.65	-
Ribeiro et al. (2016)a	-25.9	-45.7	South Atlantic Ocean	5	surface	593097	11.8619	105860	10.4177	698957	22.2796	0.178487	0.878243	23.5	36.2	0.23	-	0.29	-
Ribeiro et al. (2016)a	-25.9	-45.7	South Atlantic Ocean	30	epipelagic	632014	12.6403	160428	10.2176	792442	22.8579	0.253836	0.808335	23.1	36.4	0.26	-	0.29	-
Ribeiro et al. (2016)a	-25.9	-45.7	South Atlantic Ocean	60	epipelagic	518144	10.3629	5676	0.311661	523820	10.6745	0.0109545	0.0300748	19.7	36.2	3.41	-	0.69	-
Ribeiro et al. (2016)a	-25.9	-45.7	South Atlantic Ocean	80	epipelagic	300577	6.01154	928	0.0882204	301505	6.09976	0.0030874	0.0146752	16.8	35.7	6.55	-	0.82	-
Ribeiro et al. (2016)a	-25.9	-45.7	South Atlantic Ocean	100	epipelagic	229430	4.5886	509	0.0690277	229939	4.65763	0.00221854	0.0150433	15.4	35.5	7.88	-	0.87	-
Ribeiro et al. (2016)a	-25.6	-45.9	South Atlantic Ocean	5	surface	980804	19.6161	185802	24.4658	1166606	44.0819	0.189438	1.24723	23	35.9	0.04	-	0.29	-
Ribeiro et al. (2016)a	-25.6	-45.9	South Atlantic Ocean	30	epipelagic	1124318	22.4864	168229	7.4901	1292547	29.9765	0.149628	0.333095	22.4	36.2	0.25	-	0.29	-
Ribeiro et al. (2016)a	-25.6	-45.9	South Atlantic Ocean	60	epipelagic	1057079	21.1416	252842	14.083	1309921	35.2246	0.239189	0.666129	20.9	36.5	0.09	-	0.38	-
Ribeiro et al. (2016)a	-25.6	-45.9	South Atlantic Ocean	80	epipelagic	640696	12.8139	30338	1.64445	671034	14.4584	0.0473516	0.128333	18.1	36	4.1	-	0.34	-
Ribeiro et al. (2016)a	-25.6	-45.9	South Atlantic Ocean	100	epipelagic	453151	9.06302	8775	0.516055	461926	9.57908	0.0193644	0.0569407	15.8	35.6	5.58	-	0.47	-
Ribeiro et al. (2016)a	-27.6	-48.1	South Atlantic Ocean	5	surface	1062014	21.2403	250328	21.2754	1312342	42.5157	0.235711	1.00165	23.1	33.5	0.19	-	0.43	-
Ribeiro et al. (2016)a	-27.6	-48.1	South Atlantic Ocean	30	epipelagic	995279	19.9056	293377	24.5723	1288656	44.4779	0.294769	1.23444	22.6	33.7	0.23	-	0.43	-
Ribeiro et al. (2016)a	-27.6	-48.1	South Atlantic Ocean	50	epipelagic	817319	16.3464	197651	21.6634	1014970	38.0098	0.241828	1.32527	20.3	35.9	0.21	-	0.56	-
Ribeiro et al. (2016)a	-27.6	-48.1	South Atlantic Ocean	80	epipelagic	505314	10.1063	30451	1.25391	535765	11.3602	0.0602615	0.124072	15.8	35.6	7.25	-	0.87	-
Ribeiro et al. (2016)a	-27.6	-48.1	South Atlantic Ocean	95	epipelagic	374348	7.48696	4235	0.214281	378583	7.70124	0.011313	0.0286206	13.9	35.3	9.13	-	1.09	-
Ribeiro et al. (2016)a	-27.6	-47.5	South Atlantic Ocean	5	surface	742431	14.8486	249034	15.7841	991465	30.6327	0.33543	1.063	23.1	35.7	0.25	-	0.29	-
Ribeiro et al. (2016)a	-27.6	-47.5	South Atlantic Ocean	50	epipelagic	427755	8.5551	232818	9.35239	660573	17.9075	0.544279	1.09319	23.7	37.2	0.2	-	0.25	-
Ribeiro et al. (2016)a	-27.6	-47.5	South Atlantic Ocean	85	epipelagic	370617	7.41234	83417	3.15768	454034	10.57	0.225076	0.426003	22.9	37	0.47	-	0.25	-
Ribeiro et al. (2016)a	-27.2	-47.3	South Atlantic Ocean	5	surface	770991	15.4198	200098	13.4962	971089	28.9161	0.259534	0.875252	23.2	36.3	0.28	-	0.29	-
Ribeiro et al. (2016)a	-27.2	-47.3	South Atlantic Ocean	50	epipelagic	561776	11.2355	298867	12.5798	860643	23.8154	0.532004	1.11965	23.6	37.2	0.28	-	0.2	-
Ribeiro et al. (2016)a	-27.2	-47.3	South Atlantic Ocean	85	epipelagic	416715	8.3343	105828	4.35491	522543	12.6892	0.253958	0.522529	23.4	37.1	0.33	-	0.25	-
Ribeiro et al. (2016)a	-27.7	-47.1	South Atlantic Ocean	5	surface	660426	13.2085	138738	7.45403	799164	20.6625	0.210073	0.564335	23.5	36.8	0.22	-	0.29	-
Ribeiro et al. (2016)a	-27.7	-47.1	South Atlantic Ocean	50	epipelagic	710766	14.2153	225776	10.3483	936542	24.5636	0.317652	0.727966	23.6	37.1	0.22	-	0.29	-
Ribeiro et al. (2016)a	-27.8	-47.1	South Atlantic Ocean	5	surface	877857	17.5571	19800	3.05896	897657	20.6161	0.0225549	0.174229	23.5	36.5	0.14	-	0.29	-
Ribeiro et al. (2016)a	-27.8	-47.1	South Atlantic Ocean	60	epipelagic	595198	11.904	298319	12.3791	893517	24.2831	0.50121	1.03992	23.7	37.2	0.22	-	0.25	-
Ribeiro et al. (2016)a	-28	-46.9	South Atlantic Ocean	5	surface	792947	15.8589	54557	3.76936	847504	19.6283	0.0688028	0.23768	23.7	36.8	0.16	-	0.43	-
Ribeiro et al. (2016)a	-28	-46.9	South Atlantic Ocean	65	epipelagic	685179	13.7036	298914	12.7152	984093	26.4188	0.436257	0.927872	23.2	37	0.25	-	0.2	-
Ribeiro et al. (2016)a	-28	-46.9	South Atlantic Ocean	100	epipelagic	603196	12.0639	201147	8.52791	804343	20.5918	0.333469	0.706894	22.7	36.9	0.22	-	0.25	-
Ribeiro et al. (2016)a	-27.9	-46.6	South Atlantic Ocean	5	surface	910531	18.2106	127828	6.15409	1038359	24.3647	0.140388	0.33794	22.9	36.7	0.14	-	0.25	-
Ribeiro et al. (2016)a	-27.9	-46.6	South Atlantic Ocean	65	epipelagic	873133	17.4627	263510	11.7023	1136643	29.165	0.301798	0.670133	22.5	36.7	0.11	-	0.25	-
Ribeiro et al. (2016)a	-27.9	-46.6	South Atlantic Ocean	100	epipelagic	577593	11.5519	160396	7.26827	737989	18.8201	0.277697	0.629186	22	36.7	0.25	-	0.29	-
Ribeiro et al. (2016)a	-28.1	-46.2	South Atlantic Ocean	5	surface	758346	15.1669	126433	5.88247	884779	21.0494	0.166722	0.387849	23	36.9	0.37	-	0.25	-
Ribeiro et al. (2016)a	-28.1	-46.2	South Atlantic Ocean	60	epipelagic	743247	14.8649	189048	8.61444	932295	23.4794	0.254354	0.579514	22.9	36.9	0.34	-	0.25	-
Ribeiro et al. (2016)a	-28.1	-46.2	South Atlantic Ocean	100	epipelagic	454190	9.0838	239025	10.263	693215	19.3468	0.526267	1.12982	21.5	36.7	0.4	-	0.29	-
Ribeiro et al. (2016)a	-28.4	-45.5	South Atlantic Ocean	5	surface	773486	15.4697	217614	9.30195	991100	24.7717	0.281342	0.6013	22.6	36.7	0.46	-	0.29	-
Ribeiro et al. (2016)a	-28.4	-45.5	South Atlantic Ocean	50	epipelagic	717757	14.3551	253486	12.1137	971243	26.4689	0.353164	0.843859	22.4	36.7	0.18	-	0.29	-
Ribeiro et al. (2016)a	-28.4	-45.5	South Atlantic Ocean	90	epipelagic	365212	7.30424	68171	2.73347	433383	10.0377	0.186661	0.374231	21.5	36.7	0.47	-	0.29	-
Ribeiro et al. (2016)a	-28.7	-45	South Atlantic Ocean	5	surface	694824	13.8965	97514	5.04054	792338	18.937	0.140343	0.362721	22.4	36.4	0.28	-	0.29	-
Ribeiro et al. (2016)a	-28.7	-45	South Atlantic Ocean	60	epipelagic	670259	13.4052	223082	9.98021	893341	23.3854	0.33283	0.744504	21.4	36.6	0.25	-	0.16	-
Ribeiro et al. (2016)a	-28.7	-45	South Atlantic Ocean	80	epipelagic	702714	14.0543	239272	10.977	941986	25.0313	0.340497	0.781043	21	36.6	0.21	-	0.2	-
Ribeiro et al. (2016)a	-28.7	-45	South Atlantic Ocean	100	epipelagic	551179	11.0236	196819	10.0032	747998	21.0268	0.357087	0.907439	20.5	36.5	0.25	-	0.25	-
Ribeiro et al. (2016)a	-29.9	-48.9	South Atlantic Ocean	5	surface	1104273	22.0855	214005	13.6131	1318278	35.6986	0.193797	0.616385	22.8	34.21	0.25	-	0.34	-
Ribeiro et al. (2016)a	-30.1	-48.5	South Atlantic Ocean	5	surface	1247198	24.944	172995	9.11023	1420193	34.0542	0.138707	0.365228	22.4	33.53	0.27	-	0.38	-
Ribeiro et al. (2016)a	-30.1	-48.3	South Atlantic Ocean	5	surface	1203743	24.0749	158113	8.51907	1361856	32.5939	0.131351	0.353858	22.3	34.68	0.25	-	0.2	-
Ribeiro et al. (2016)a	-30.4	-48.3	South Atlantic Ocean	5	surface	1074900	21.498	240047	12.3706	1314947	33.8686	0.22332	0.575432	22.8	35.69	0.23	-	0.34	-
Ribeiro et al. (2016)a	-30.3	-48	South Atlantic Ocean	5	surface	1060343	21.2069	218590	11.4917	1278933	32.6985	0.20615	0.541885	22.8	35.22	0.36	-	0.34	-
Ribeiro et al. (2016)a	-30.5	-48	South Atlantic Ocean	5	surface	1069619	21.3924	286124	14.4167	1355743	35.8091	0.267501	0.673916	23.9	35.38	0.21	-	0.38	-
Ribeiro et al. (2016)a	-30.5	-47.8	South Atlantic Ocean	5	surface	1047116	20.9423	234615	12.1464	1281731	33.0888	0.224058	0.579995	23	36.03	0.25	-	0.29	-
Ribeiro et al. (2016)a	-30.7	-47.8	South Atlantic Ocean	5	surface	688907	13.7781	268229	12.4214	957136	26.1996	0.389354	0.901531	23	36.76	0.24	-	0.29	-
Ribeiro et al. (2016)a	-30.8	-47.6	South Atlantic Ocean	5	surface	826031	16.5206	154119	8.24918	980150	24.7698	0.186578	0.499326	21.1	36.22	0.25	-	0.29	-
Ribeiro et al. (2016)a	-30.6	-47.1	South Atlantic Ocean	5	surface	822805	16.4561	134776	6.59664	957581	23.0527	0.163801	0.400863	21.9	36.59	0.29	-	0.29	-
Ribeiro et al. (2016)a	-31.1	-46.9	South Atlantic Ocean	5	surface	864779	17.2956	60000	4.80736	924779	22.1029	0.0693819	0.277953	20.2	36.69	0.28	-	0.29	-
Bergo et al. (2017)b	-24.3553	-46.0142	South Atlantic Ocean	5	surface	2110000	42.2	47600	9.23529	2157600	51.4353	0.0225592	0.218846	26.7	34.97	0.23	0.07	0.12	3.21
Bergo et al. (2017)b	-24.3553	-46.0142	South Atlantic Ocean	10	surface	1930000	38.6	126280	30.3639	2056280	68.9639	0.0654301	0.786628	26.02	35.14	0.03	0.05	0.12	2.39
Bergo et al. (2017)b	-24.3553	-46.0142	South Atlantic Ocean	20	epipelagic	680000	13.6	32670	7.7074	712670	21.3074	0.0480441	0.56672	19.64	35.56	0.23	0.03	0.28	2.21
Bergo et al. (2017)b	-24.3553	-46.0142	South Atlantic Ocean	30	epipelagic	720000	14.4	7410	1.42764	727410	15.8276	0.0102917	0.0991416	18.18	35.56	0.31	0.07	0.28	1.44
Bergo et al. (2017)b	-24.3553	-46.0142	South Atlantic Ocean	42	epipelagic	847000	16.94	12040	2.30792	859040	19.2479	0.0142149	0.136241	15.44	35.47	6.41	0.37	0.85	7.12
Bergo et al. (2017)b	-24.6695	-45.8478	South Atlantic Ocean	5	surface	2.03e+06	40.6	10787	1.909	2.04079e+06	42.509	0.00531379	0.0470197	25.81	35.21	0.02	0.03	0.28	2.45
Bergo et al. (2017)b	-24.6695	-45.8478	South Atlantic Ocean	10	surface	1990000	39.8	15360	2.20509	2005360	42.0051	0.00771859	0.0554044	25.8	35.29	0	0	0.23	2.33
Bergo et al. (2017)b	-24.6695	-45.8478	South Atlantic Ocean	20	epipelagic	1380000	27.6	47325	11.1029	1427325	38.7029	0.0342935	0.402279	25.37	35.61	0	0.03	0.23	1.44
Bergo et al. (2017)b	-24.6695	-45.8478	South Atlantic Ocean	35	epipelagic	1360000	27.2	28005	4.36367	1388005	31.5637	0.0205919	0.160429	15.04	35.43	4.99	0.12	0.75	8.36
Bergo et al. (2017)b	-24.6695	-45.8478	South Atlantic Ocean	50	epipelagic	934000	18.68	25315	3.94264	959315	22.6226	0.0271039	0.211062	14.96	35.44	10.19	0	1.22	10.61
Bergo et al. (2017)b	-24.6695	-45.8478	South Atlantic Ocean	60	epipelagic	1250000	25	31750	5.07977	1281750	30.0798	0.0254	0.203191	14.96	35.44	10.45	0.16	1.27	9.72
Bergo et al. (2017)b	-25.1482	-45.5977	South Atlantic Ocean	5	surface	1560000	31.2	102110	25.5088	1662110	56.7088	0.0654551	0.81759	25.48	35.28	0.61	0.03	0.17	1.56
Bergo et al. (2017)b	-25.1482	-45.5977	South Atlantic Ocean	10	surface	1700000	34	118510	29.5918	1818510	63.5918	0.0697118	0.870348	25.46	35.28	0.77	0.05	0.23	1.56
Bergo et al. (2017)b	-25.1482	-45.5977	South Atlantic Ocean	20	epipelagic	1260000	25.2	72810	17.7112	1332810	42.9112	0.0577857	0.702825	22.17	35.96	0.21	0.05	0.17	2.09
Bergo et al. (2017)b	-25.1482	-45.5977	South Atlantic Ocean	40	epipelagic	1690000	33.8	20070	4.46742	1710070	38.2674	0.0118757	0.132172	16.66	35.67	0.45	0.03	0.17	1.44
Bergo et al. (2017)b	-25.1482	-45.5977	South Atlantic Ocean	60	epipelagic	999000	19.98	35430	1.64207	1034430	21.6221	0.0354655	0.0821856	16.02	35.66	6.58	0.51	0.64	4.46
Bergo et al. (2017)b	-25.1482	-45.5977	South Atlantic Ocean	80	epipelagic	769000	15.38	660	0.102043	769660	15.482	0.000858257	0.00663478	15.97	35.65	6.73	0.55	0.64	4.46
Bergo et al. (2017)b	-25.4153	-45.46	South Atlantic Ocean	10	surface	1350000	27	35765	8.49905	1385765	35.4991	0.0264926	0.31478	25.17	35.41	0	0	0.23	1.09
Bergo et al. (2017)b	-25.4153	-45.46	South Atlantic Ocean	30	epipelagic	745000	14.9	34155	7.29401	779155	22.194	0.0458456	0.489531	19.62	36.21	5.82	0.14	0.28	2.03
Bergo et al. (2017)b	-25.4153	-45.46	South Atlantic Ocean	50	epipelagic	1180000	23.6	42100	4.8006	1222100	28.4006	0.035678	0.203415	17.28	35.86	8.35	0.07	0.44	2.8
Bergo et al. (2017)b	-25.4153	-45.46	South Atlantic Ocean	70	epipelagic	347000	6.94	145	0.0155201	347145	6.95552	0.000417867	0.00223633	15.73	35.65	8.51	0.07	0.64	3.04
Bergo et al. (2017)b	-25.4153	-45.46	South Atlantic Ocean	100	epipelagic	372000	7.44	8840	0.527696	380840	7.9677	0.0237634	0.0709269	14.9	35.51	2.64	0.16	0.85	3.69
Bergo et al. (2017)b	-25.7678	-45.2837	South Atlantic Ocean	10	surface	417000	8.34	37905	9.58879	454905	17.9288	0.0908993	1.14974	26.1	36.97	0.7	0.07	0.12	1.44
Bergo et al. (2017)b	-25.7678	-45.2837	South Atlantic Ocean	20	epipelagic	392000	7.84	2812	0.558205	394812	8.39821	0.00717347	0.0711996	26.1	36.97	0.1	0.03	0.07	1.38
Bergo et al. (2017)b	-25.7678	-45.2837	South Atlantic Ocean	70	epipelagic	484000	9.68	40522	1.57021	524522	11.2502	0.0837231	0.162212	23.44	37.05	0.35	0.03	0.07	2.51
Bergo et al. (2017)b	-25.7678	-45.2837	South Atlantic Ocean	100	epipelagic	244000	4.88	33157	1.22567	277157	6.10567	0.135889	0.251162	21.94	36.78	0.66	0	0.07	1.2
Bergo et al. (2017)b	-26.0277	-45.1541	South Atlantic Ocean	20	epipelagic	729000	14.58	7123	1.66164	736123	16.2416	0.00977092	0.113967	25.72	36.88	0	0	0.12	1.56
Bergo et al. (2017)b	-26.0277	-45.1541	South Atlantic Ocean	60	epipelagic	730000	14.6	5677	1.08979	735677	15.6898	0.00777671	0.0746429	23.11	36.91	0	0	0.12	1.14
Bergo et al. (2017)b	-26.1838	-45.0751	South Atlantic Ocean	20	epipelagic	607000	12.14	7601	1.74617	614601	13.8862	0.0125222	0.143836	25.43	36.83	0.22	0	0.07	1.32
Bergo et al. (2017)b	-26.1838	-45.0751	South Atlantic Ocean	60	epipelagic	449000	8.98	3773	0.769526	452773	9.74953	0.00840312	0.0856933	23.54	37.07	0.33	0.03	0.12	4.1
Bergo et al. (2017)b	-26.1848	-45.0755	South Atlantic Ocean	20	epipelagic	647000	12.94	2835	0.598295	649835	13.5383	0.00438176	0.0462361	25.64	36.81	0.04	0.03	0.12	1.62
Bergo et al. (2017)b	-26.1848	-45.0755	South Atlantic Ocean	60	epipelagic	403000	8.06	2372	0.410679	405372	8.47068	0.00588586	0.0509528	23.8	37.15	0.15	0.07	0.07	0.02
Bergo et al. (2017)b	-26.7153	-45.7882	South Atlantic Ocean	10	surface	472000	9.44	1403	0.248471	473403	9.68847	0.00297246	0.0263211	26.22	37.08	0	0.03	0.17	1.32
Bergo et al. (2017)b	-26.7153	-45.7882	South Atlantic Ocean	70	epipelagic	594000	11.88	3860	0.807613	597860	12.6876	0.00649832	0.0679809	23.53	37.07	0	0.03	0.07	1.14
Otero Ferrer et al. (2018)c	25.798	-33.9953	North Atlantic Ocean	5	surface	494756	9.89513	53083.9	2.13345	547840	12.0286	0.107293	0.215606	25.9008	-	0.247	-	-	-
Otero Ferrer et al. (2018)c	24.8659	-36.6033	North Atlantic Ocean	5	surface	641953	12.8391	62879.3	3.14596	704832	15.985	0.09795	0.24503	26.8964	-	0.2	-	-	-
Otero Ferrer et al. (2018)c	24.9353	-36.5902	North Atlantic Ocean	5	surface	566022	11.3204	55059.8	3.17869	621082	14.4991	0.0972749	0.280791	26.8838	-	0.2	-	-	-
Otero Ferrer et al. (2018)c	24.8928	-26.2078	North Atlantic Ocean	5	surface	651660	13.0332	132208	5.04506	783867	18.0783	0.202878	0.387094	25.5988	-	0.194	-	-	-
Otero Ferrer et al. (2018)c	24.7812	-26.2682	North Atlantic Ocean	5	surface	589047	11.7809	231135	8.67576	820181	20.4567	0.392388	0.736424	25.4897	-	0.192	-	-	-
Otero Ferrer et al. (2018)c	24.7	-26.297	North Atlantic Ocean	5	surface	373222	7.46444	183596	7.04655	556818	14.511	0.491921	0.944016	25.4771	-	0.184	-	-	-
Otero Ferrer et al. (2018)c	24.668	-26.329	North Atlantic Ocean	5	surface	449478	8.98957	153269	5.90307	602748	14.8926	0.340993	0.656658	25.4557	-	0.203	-	-	-
Otero Ferrer et al. (2018)c	24.6292	-26.3372	North Atlantic Ocean	5	surface	467108	9.34216	169677	6.55613	636785	15.8983	0.363251	0.701778	25.3977	-	0.185	-	-	-
Otero Ferrer et al. (2018)c	-27.6323	-31.3955	South Atlantic Ocean	5	surface	516996	10.3399	176511	6.55035	693507	16.8903	0.341417	0.633501	24.6356	-	0.027	-	-	-
Otero Ferrer et al. (2018)c	-24.4376	-29.2454	South Atlantic Ocean	5	surface	619727	12.3945	136026	4.98094	755753	17.3755	0.219493	0.401866	26.583	-	0.037	-	-	-
Otero Ferrer et al. (2018)c	-20.3196	-29.1247	South Atlantic Ocean	5	surface	615201	12.304	152081	5.52531	767282	17.8293	0.247205	0.449066	27.96	-	0.027	-	-	-
Otero Ferrer et al. (2018)c	-16.6098	-29.003	South Atlantic Ocean	5	surface	675200	13.504	165888	6.07314	841088	19.5771	0.245687	0.449729	27.836	-	0.034	-	-	-
Otero Ferrer et al. (2018)c	-13.0459	-28.9989	South Atlantic Ocean	5	surface	638499	12.77	126852	4.63433	765351	17.4043	0.198672	0.362908	28.0332	-	0.034	-	-	-
Otero Ferrer et al. (2018)c	-9.08828	-28.9997	South Atlantic Ocean	5	surface	595007	11.9001	190607	7.02952	785614	18.9297	0.320344	0.590709	28.3553	-	0.028	-	-	-
Otero Ferrer et al. (2018)c	-5.13547	-29.0072	South Atlantic Ocean	5	surface	599730	11.9946	256473	10.3278	856203	22.3224	0.427647	0.86104	28.2746	-	0.021	-	-	-
Otero Ferrer et al. (2018)c	-1.22711	-29.0028	South Atlantic Ocean	5	surface	896614	17.9323	285420	12.9826	1182034	30.9149	0.318331	0.72398	28.4454	-	0.035	-	-	-
Otero Ferrer et al. (2018)c	2.23356	-28.9994	North Atlantic Ocean	5	surface	1085552	21.711	330042	14.3483	1415594	36.0594	0.304031	0.660876	28.2095	-	0.03	-	-	-
Otero Ferrer et al. (2018)c	5.98206	-29.003	North Atlantic Ocean	5	surface	962248	19.245	206483	8.57671	1168731	27.8217	0.214584	0.44566	27.7774	-	0.043	-	-	-
Otero Ferrer et al. (2018)c	9.97967	-29.0023	North Atlantic Ocean	5	surface	1011924	20.2385	260741	10.3855	1272665	30.6239	0.257669	0.513154	26.9001	-	0.025	-	-	-
Otero Ferrer et al. (2018)c	13.9083	-29.0105	North Atlantic Ocean	5	surface	971033	19.4207	310910	12.4457	1281943	31.8664	0.320185	0.640849	25.963	-	0.086	-	-	-
Otero Ferrer et al. (2018)c	17.8738	-29.0166	North Atlantic Ocean	5	surface	619069	12.3814	242310	10.3634	861379	22.7448	0.39141	0.837014	25.0123	-	0.122	-	-	-
Otero Ferrer et al. (2018)c	25.6468	-29.0022	North Atlantic Ocean	5	surface	507919	10.1584	96116	4.862	604035	15.0204	0.189235	0.478619	23.3534	-	0.033	-	-	-
Otero Ferrer et al. (2018)c	29.1827	-28.9384	North Atlantic Ocean	5	surface	411284	8.22568	92336	4.92126	503620	13.1469	0.224507	0.59828	22.8114	-	0.03	-	-	-
Otero Ferrer et al. (2018)c	29.1818	-24.4149	North Atlantic Ocean	5	surface	731039	14.6208	80070	4.63244	811109	19.2532	0.109529	0.31684	22.7768	-	0.053	-	-	-
Otero Ferrer et al. (2018)c	29.1828	-19.8682	North Atlantic Ocean	5	surface	864016	17.2803	136644	6.66964	1000660	23.95	0.15815	0.385967	22.5415	-	0.06	-	-	-
Otero Ferrer et al. (2018)c	29.1848	-15.4518	North Atlantic Ocean	5	surface	852314	17.0463	106838	6.39345	959152	23.4397	0.125351	0.375065	21.4166	-	0.056	-	-	-
Otero Ferrer et al. (2018)c	41.7502	5.1265	North Atlantic Ocean	6	surface	673106	13.4621	62963.6	15.2287	736070	28.6908	0.0935418	1.13122	13.0148	-	5.85858
Otero Ferrer et al. (2018)c	41.5162	5.13383	North Atlantic Ocean	5	surface	654419	13.0884	84841.6	16.1504	739261	29.2388	0.129644	1.23395	13.2653	-	4.63364	-	-	-
Otero Ferrer et al. (2018)c	41.7372	5.13033	North Atlantic Ocean	5	surface	783928	15.6786	60342.2	11.8402	844270	27.5188	0.0769742	0.755187	13.1496	-	5.81611	-	-	-
Otero Ferrer et al. (2018)c	41.7493	5.12683	North Atlantic Ocean	5	surface	1.23893e+06	24.7785	159919	35.1233	1.39885e+06	59.9019	0.129079	1.41749	13.3424	-	2.97547	-	-	-
Otero Ferrer et al. (2018)c	41.7382	4.07617	North Atlantic Ocean	5	surface	2.93959e+06	58.7917	102743	18.4449	3.04233e+06	77.2366	0.0349514	0.313733	13.1642	-	3.70882	-	-	-
Otero Ferrer et al. (2018)c	41.7548	5.124	North Atlantic Ocean	5	surface	2.09705e+06	41.9409	83833.4	17.8505	2.18088e+06	59.7914	0.0399769	0.42561	13.0849	-	3.82725	-	-	-
Otero Ferrer et al. (2018)c	41.0002	4.874	North Atlantic Ocean	5	surface	703807	14.0761	378125	93.6741	1.08193e+06	107.75	0.537257	6.65482	14.4219	-	2.78182	-	-	-
Otero Ferrer et al. (2018)c	41.1658	3.93933	North Atlantic Ocean	5	surface	438555	8.77111	115771	28.4591	554326	37.2302	0.263982	3.24465	14.9926	-	1.02156	-	-	-
Otero Ferrer et al. (2018)c	41.0575	3.95767	North Atlantic Ocean	5	surface	451132	9.02264	96692.1	24.143	547824	33.1656	0.214332	2.67582	15.1231	-	1.30348	-	-	-
Otero Ferrer et al. (2018)c	42.11	4.54033	North Atlantic Ocean	5	surface	587279	11.7456	150970	37.9672	738249	49.7127	0.257067	3.23247	14.4982	-	1.78998	-	-	-
Otero Ferrer et al. (2018)c	42.0257	4.05967	North Atlantic Ocean	5	surface	299881	5.99763	56199.9	13.4866	356081	19.4842	0.187407	2.24865	14.8843	-	1.57279	-	-	-
Otero Ferrer et al. (2018)c	42.0543	4.09833	North Atlantic Ocean	5	surface	211014	4.22028	29629.4	7.05234	240643	11.2726	0.140414	1.67106	15.4748	-	1.33891	-	-	-
Otero Ferrer et al. (2018)c	41.4597	4.59633	North Atlantic Ocean	5	surface	200226	4.00451	66711.4	14.1012	266937	18.1058	0.333181	3.52134	15.8732	-	1.0628	-	-	-
Otero Ferrer et al. (2018)c	41.4085	4.54467	North Atlantic Ocean	5	surface	722725	14.4545	32458	7.59159	755183	22.0461	0.0449105	0.525206	16.1439	-	2.16507	-	-	-
Otero Ferrer et al. (2018)c	41.4737	4.22983	North Atlantic Ocean	5	surface	834418	16.6884	27659.2	4.8161	862077	21.5044	0.033148	0.28859	24.0053	-	1.48202	-	-	-
Otero Ferrer et al. (2018)c	41.4765	4.20767	North Atlantic Ocean	5	surface	523855	10.4771	21217.3	4.15257	545072	14.6297	0.0405023	0.396348	24.1001	-	1.87023	-	-	-
Otero Ferrer et al. (2018)c	41.9293	4.0445	North Atlantic Ocean	5	surface	516213	10.3243	42536.2	6.64728	558749	16.9715	0.0824004	0.643851	22.8777	-	0.730465	-	-	-
Otero Ferrer et al. (2018)c	43.422	-8.3214	North Atlantic Ocean	5	surface	192175	3.8435	7203.68	1.67474	199379	5.51824	0.037485	0.435733	15.8071	-	2.18	-	-	-
Otero Ferrer et al. (2018)c	43.422	-8.3214	North Atlantic Ocean	5	surface	45395.6	0.907913	8824.01	1.91891	54219.7	2.82682	0.19438	2.11354	16.2408	-	2.27	-	-	-
Otero Ferrer et al. (2018)c	43.422	-8.3214	North Atlantic Ocean	5	surface	194976	3.89951	11047.2	0.194676	206023	4.09419	0.0566593	0.0499233	16.4167	-	2.26	-	-	-
Otero Ferrer et al. (2018)c	43.422	-8.3214	North Atlantic Ocean	5	surface	115936	2.31871	57.9764	0.0111342	115994	2.32985	0.000500074	0.00480189	16.1142	-	2.57	-	-	-
Otero Ferrer et al. (2018)c	43.3713	-8.36308	North Atlantic Ocean	5	surface	479380	9.5876	12063.3	3.07249	491444	12.6601	0.0251644	0.320464	15.8466	-	5.35	-	-	-
Otero Ferrer et al. (2018)c	43.3713	-8.36308	North Atlantic Ocean	5	surface	363774	7.27548	26893.7	2.53014	390667	9.80562	0.0739298	0.347763	15.9815	-	4.95	-	-	-
Otero Ferrer et al. (2018)c	43.3713	-8.36308	North Atlantic Ocean	5	surface	629476	12.5895	27125.9	2.55001	656602	15.1395	0.0430929	0.20255	16.0152	-	3.89	-	-	-
Otero Ferrer et al. (2018)c	43.3713	-8.36308	North Atlantic Ocean	5	surface	455318	9.10637	23498.2	1.96521	478817	11.0716	0.0516082	0.215806	16.1668	-	4.65	-	-	-
Otero Ferrer et al. (2018)c	43.3713	-8.36308	North Atlantic Ocean	5	surface	545231	10.9046	20591.7	2.30283	565823	13.2075	0.0377669	0.211179	16.0586	-	4.9	-	-	-
Otero Ferrer et al. (2018)c	43.3717	-8.36333	North Atlantic Ocean	5	surface	344768	6.89537	54040.2	8.9152	398809	15.8106	0.156744	1.29293	19.432	-	0.62	-	-	-
Otero Ferrer et al. (2018)c	43.3717	-8.36333	North Atlantic Ocean	5	surface	767296	15.3459	39015.3	7.27383	806311	22.6197	0.0508479	0.473992	19.0131	-	0.84	-	-	-
Otero Ferrer et al. (2018)c	43.3717	-8.36333	North Atlantic Ocean	5	surface	279873	5.59745	19250.6	2.15519	299123	7.75264	0.0687836	0.38503	19.6516	-	0.89	-	-	-
Otero Ferrer et al. (2018)c	43.3717	-8.36333	North Atlantic Ocean	5	surface	386250	7.725	17983	2.86634	404233	10.5913	0.0465579	0.371048	19.56	-	0.83	-	-	-
Otero Ferrer et al. (2018)c	43.3717	-8.36333	North Atlantic Ocean	5	surface	522715	10.4543	17930.9	0.866878	540646	11.3212	0.0343033	0.0829208	19.4964	-	0.76	-	-	-
Otero Ferrer et al. (2018)c	43.4534	-8.50125	North Atlantic Ocean	5	surface	897798	17.956	3107.61	0.614043	900905	18.57	0.00346137	0.0341972	15.7154	-	3.59	-	-	-
Otero Ferrer et al. (2018)c	43.4217	-8.43667	North Atlantic Ocean	5	surface	670411	13.4082	2294.19	0.46935	672705	13.8776	0.00342207	0.0350046	15.9095	-	2.54	-	-	-
Otero Ferrer et al. (2018)c	43.3933	-8.4	North Atlantic Ocean	5	surface	611077	12.2215	3774.49	0.808997	614852	13.0305	0.00617679	0.0661943	15.4687	-	6.89	-	-	-
Otero Ferrer et al. (2018)c	43.3633	-8.37	North Atlantic Ocean	5	surface	360978	7.21956	2395.89	0.477038	363374	7.6966	0.00663722	0.0660757	15.8429	-	3.06	-	-	-
Otero Ferrer et al. (2018)c	43.3633	-8.37	North Atlantic Ocean	5	surface	274891	5.49783	3058.37	0.633176	277950	6.131	0.0111257	0.115168	18.8154	-	1.25	-	-	-
Otero Ferrer et al. (2018)c	43.3933	-8.4	North Atlantic Ocean	5	surface	528757	10.5751	4309.94	0.900253	533067	11.4754	0.00815107	0.0851292	18.0068	-	1.24	-	-	-
Otero Ferrer et al. (2018)c	43.3633	-8.37	North Atlantic Ocean	5	surface	373531	7.47062	1886.49	0.292214	375418	7.76284	0.00505043	0.0391151	19.4831	-	1.85	-	-	-
Otero Ferrer et al. (2018)c	43.3933	-8.4	North Atlantic Ocean	5	surface	691917	13.8383	1392.5	0.191544	693309	14.0299	0.00201252	0.0138416	18.5224	-	2.63	-	-	-
Otero Ferrer et al. (2018)c	43.4217	-8.43667	North Atlantic Ocean	5	surface	359572	7.19145	4033.78	0.845195	363606	8.03664	0.0112183	0.117528	18.0786	-	2.92	-	-	-
Otero Ferrer et al. (2018)c	43.4534	-8.50125	North Atlantic Ocean	5	surface	572772	11.4554	3586.8	0.696168	576359	12.1516	0.00626217	0.0607718	17.8376	-	2.99	-	-	-
Otero Ferrer et al. (2018)c	43.3633	-8.37	North Atlantic Ocean	5	surface	451053	9.02106	8737.21	2.07058	459790	11.0916	0.0193707	0.229527	19.0316	-	0.9	-	-	-
Otero Ferrer et al. (2018)c	43.3933	-8.4	North Atlantic Ocean	5	surface	273771	5.47542	1189.5	0.173672	274960	5.64909	0.00434486	0.0317185	18.7004	-	1.07	-	-	-
Otero Ferrer et al. (2018)c	43.4217	-8.43667	North Atlantic Ocean	5	surface	334185	6.6837	1824.8	0.316908	336010	7.00061	0.00546043	0.0474151	18.3309	-	1.81	-	-	-
Otero Ferrer et al. (2018)c	43.4534	-8.50125	North Atlantic Ocean	5	surface	463377	9.26754	2520.35	0.500246	465897	9.76778	0.0054391	0.0539784	17.731	-	1.86	-	-	-
Otero Ferrer et al. (2018)c	42.174	-8.89	North Atlantic Ocean	5	surface	945323	18.9065	2632.91	0.534487	947956	19.441	0.0027852	0.0282701	16.0541	-	2.91387	-	-	-
Otero Ferrer et al. (2018)c	42.174	-8.89	North Atlantic Ocean	5	surface	474144	9.48288	1821.67	0.285467	475966	9.76835	0.00384201	0.0301034	15.0428	-	6.36329	-	-	-
Otero Ferrer et al. (2018)c	43.4217	-8.43667	North Atlantic Ocean	5	surface	458558	9.17116	7674.31	0.62666	466232	9.79782	0.0167357	0.0683294	12.8	-	0.37838	-	-	-
Otero Ferrer et al. (2018)c	43.4217	-8.43667	North Atlantic Ocean	5	surface	555262	11.1052	8136.78	1.05506	563399	12.1603	0.0146539	0.0950052	13.7	-	1.64225	-	-	-
Otero Ferrer et al. (2018)c	43.4217	-8.43667	North Atlantic Ocean	5	surface	1.71079e+06	34.2157	44766.3	1.87896	1.75555e+06	36.0947	0.0261671	0.0549152	14	-	0.13149	-	-	-
Otero Ferrer et al. (2018)c	43.4217	-8.43667	North Atlantic Ocean	5	surface	900604	18.0121	17695.1	3.41947	918299	21.4315	0.019648	0.189843	14.6	-	0.83322	-	-	-
Otero Ferrer et al. (2018)c	43.4217	-8.43667	North Atlantic Ocean	5	surface	531573	10.6315	19526.2	0.406845	551099	11.0383	0.0367329	0.038268	15.5	-	2.42217	-	-	-
Otero Ferrer et al. (2018)c	43.4217	-8.43667	North Atlantic Ocean	5	surface	561686	11.2337	43498.8	7.73903	605185	18.9728	0.0774433	0.68891	18.5	-	0.60901	-	-	-
Otero Ferrer et al. (2018)c	43.4217	-8.43667	North Atlantic Ocean	5	surface	446993	8.93986	17571.3	0.28829	464564	9.22815	0.0393099	0.0322478	13.6	-	0.00788	-	-	-
Otero Ferrer et al. (2018)c	43.4217	-8.43667	North Atlantic Ocean	5	surface	778685	15.5737	29377.1	5.1483	808062	20.722	0.0377266	0.330576	15.6	-	0	-	-	-
Otero Ferrer et al. (2018)c	43.4217	-8.43667	North Atlantic Ocean	5	surface	598516	11.9703	23567.7	0.342965	622083	12.3133	0.039377	0.0286513	13.7	-	3.69022	-	-	-
Otero Ferrer et al. (2018)c	43.4217	-8.43667	North Atlantic Ocean	5	surface	416845	8.33691	7207.37	0.312119	424053	8.64903	0.0172903	0.0374382	16.1	-	0.05346	-	-	-
Otero Ferrer et al. (2018)c	43.4217	-8.43667	North Atlantic Ocean	5	surface	652308	13.0462	17143.6	3.11378	669452	16.1599	0.0262814	0.238674	16.3	-	2.37852	-	-	-
Otero Ferrer et al. (2018)c	43.4217	-8.43667	North Atlantic Ocean	5	surface	455620	9.1124	40399.1	4.80233	496019	13.9147	0.0886683	0.527011	17	-	1.05887	-	-	-
Otero Ferrer et al. (2018)c	42.149	-8.921	North Atlantic Ocean	5	surface	569376	11.3875	5156.12	0.126395	574532	11.5139	0.00905575	0.0110994	15.3313	-	0.2917	-	-	-
Otero Ferrer et al. (2018)c	42.18	-8.865	North Atlantic Ocean	5	surface	156343	3.12685	2070.21	0.238474	158413	3.36532	0.0132415	0.0762665	15.4541	-	0.1563	-	-	-
Otero Ferrer et al. (2018)c	42.221	-8.862	North Atlantic Ocean	5	surface	557160	11.1432	725.798	0.0997548	557886	11.243	0.00130267	0.00895208	15.8885	-	0.3135	-	-	-
Otero Ferrer et al. (2018)c	42.222	-8.828	North Atlantic Ocean	5	surface	516867	10.3373	3902.99	0.995264	520770	11.3326	0.00755126	0.0962785	16.4732	-	0.1798	-	-	-
Otero Ferrer et al. (2018)c	42.228	-8.792	South Atlantic Ocean	5	surface	760382	15.2076	4678.66	1.19306	765061	16.4007	0.00615304	0.0784512	16.4595	-	0.0307	0.03	0.28	2.45
Otero Ferrer et al. (2018)c	42.258	-8.921	South Atlantic Ocean	5	surface	875899	17.518	5252.87	1.25823	881152	18.7762	0.00599711	0.0718249	16.3633	-	0.0405	0	0.23	2.33
Otero Ferrer et al. (2018)c	42.3598	-8.82783	South Atlantic Ocean	5	surface	461148	9.22296	29150.1	4.78043	490298	14.0034	0.063212	0.518318	16.2461	-	0.0404	0.03	0.23	1.44
Otero Ferrer et al. (2018)c	42.357	-8.772	South Atlantic Ocean	5	surface	857678	17.1536	5697.93	1.26136	863376	18.4149	0.00664344	0.0735331	16.0321	-	0.0611	0.12	0.75	8.36
Otero Ferrer et al. (2018)c	42.357	-8.772	South Atlantic Ocean	5	surface	754561	15.0912	6182.11	1.39834	760744	16.4896	0.00819299	0.0926591	16.1094	-	0.0663	0	1.22	10.61
Otero Ferrer et al. (2018)c	42.357	-8.772	South Atlantic Ocean	5	surface	1.28911e+06	25.7823	9171.37	2.25185	1.29829e+06	28.0341	0.00711447	0.0873409	16.4674	-	0.1033	0.16	1.27	9.72
Otero Ferrer et al. (2018)c	42.357	-8.772	South Atlantic Ocean	5	surface	876259	17.5252	14835.7	1.4898	891095	19.015	0.0169308	0.0850092	16.2357	-	0.1169	-	-	-
Otero Ferrer et al. (2018)c	42.357	-8.772	South Atlantic Ocean	5	surface	707051	14.141	9973.27	1.32319	717025	15.4642	0.0141054	0.0935712	16.1086	-	0.0956
Otero Ferrer et al. (2018)c	42.357	-8.772	South Atlantic Ocean	5	surface	597033	11.9407	8717.92	1.30826	605751	13.2489	0.0146021	0.109563	16.648	-	0.0633
Otero Ferrer et al. (2018)c	42.357	-8.772	South Atlantic Ocean	5	surface	819020	16.3804	9687.07	1.36406	828707	17.7445	0.0118276	0.0832739	16.8315	-	0.044
Otero Ferrer et al. (2018)c	42.357	-8.772	South Atlantic Ocean	5	surface	829286	16.5857	18825.1	1.3863	848111	17.972	0.0227004	0.0835841	16.6939	-	0.05
Otero Ferrer et al. (2018)c	42.357	-8.772	South Atlantic Ocean	5	surface	865396	17.3079	15766.4	1.33116	881163	18.6391	0.0182187	0.0769107	16.6185	-	0.0616	0.07	0.12	3.21
Otero Ferrer et al. (2018)c	42.357	-8.772	South Atlantic Ocean	5	surface	824001	16.48	12361.7	1.39255	836362	17.8726	0.015002	0.0844993	16.1638	-	0.0769	0.05	0.12	2.39
Otero Ferrer et al. (2018)c	42.357	-8.772	South Atlantic Ocean	5	surface	1.04186e+06	20.8373	14103.3	1.75302	1.05597e+06	22.5903	0.0135366	0.0841289	16.668	-	0.0452	0.03	0.28	2.21
Otero Ferrer et al. (2018)c	42.357	-8.772	South Atlantic Ocean	5	surface	500013	10.0003	16735.5	1.41926	516749	11.4195	0.03347	0.141922	14.1666	-	0.4928	0.37	0.85	7.12
Otero Ferrer et al. (2018)c	42.357	-8.772	South Pacific Ocean	5	surface	46887.6	0.937751	745.223	0.026828	47632.8	0.964579	0.0158938	0.0286089	14.6902	-	0.5635	0.03	2.68	19.6
Sunagawa et al. (2015)d	-47.2129	-58.0594	South Atlantic Ocean	41.7669	epipelagic	445364	8.90728	7963.32	0.020625	453327	8.9279	0.0178805	0.00231552	6.97563	34.0576	17.1118	0.135	1.416	3.078
Sunagawa et al. (2015)d	-35.2468	26.3096	Indian Ocean	28.6815	epipelagic	585107	11.7021	70167.2	2.32001	655275	14.0222	0.119922	0.198255	21.8149	-	-	-	-	-
Sunagawa et al. (2015)d	-35.1889	26.289	Indian Ocean	5.9038	surface	605276	12.1055	73495.7	2.42566	678772	14.5312	0.121425	0.200377	21.8168	35.4467	-	-	-	-
Sunagawa et al. (2015)d	-34.9363	17.9366	Indian Ocean	5.39475	surface	596894	11.9379	48100.3	1.2172	644995	13.1551	0.0805843	0.101961	15.0335	35.3233	2.45099	0.3	0.34	2.74
Sunagawa et al. (2015)d	-34.8933	18.073	Indian Ocean	28.633	epipelagic	562832	11.2566	48835.3	1.34524	611667	12.6019	0.0867672	0.119507	15.019	35.3315	-	0.26	0.37	2.47
Sunagawa et al. (2015)d	-34.0487	-73.0843	South Pacific Ocean	5.33183	surface	1.71873e+06	34.3746	231846	8.0569	1.95057e+06	42.4315	0.134894	0.234385	18.0145	34.2954	1.48507	0.01	0.52	0.09
Sunagawa et al. (2015)d	-33.8792	-73.0465	South Pacific Ocean	33.7675	epipelagic	1.75332e+06	35.0664	92678.6	3.20647	1.846e+06	38.2728	0.052859	0.09144	16.4012	34.268	0.660123	0.37	1.07	0.59
Sunagawa et al. (2015)d	-32.2315	17.7083	South Atlantic Ocean	5.45358	surface	1.95382e+06	39.0764	160244	4.21199	2.11407e+06	43.2884	0.0820159	0.107788	12.8345	34.8453	0.405607	0.171	1.016	13.88
Sunagawa et al. (2015)d	-31.0302	4.68787	South Atlantic Ocean	40.2689	epipelagic	775819	15.5164	241885	8.19215	1.0177e+06	23.7085	0.31178	0.527968	16.7874	35.6878	-	0.285	0.227	2.436
Sunagawa et al. (2015)d	-31.0302	4.68787	South Atlantic Ocean	5.42742	surface	631998	12.64	211250	6.98783	843248	19.6278	0.334257	0.552836	16.8321	35.6868	-	0.25	0.229	2.601
Sunagawa et al. (2015)d	-30.1381	-43.29	South Atlantic Ocean	5.5735	surface	660903	13.2181	219005	7.70048	879908	20.9185	0.331372	0.582573	19.8541	36.3242	0.385346	0	0	0.481
Sunagawa et al. (2015)d	-29.5436	37.9356	Indian Ocean	63.6355	epipelagic	677720	13.5544	204212	7.11235	881932	20.6667	0.301322	0.524727	22.2503	35.3355	0.112031	0	0.08	1.75
Sunagawa et al. (2015)d	-29.7238	-101.16	South Pacific Ocean	5.51125	epipelagic	384614	7.69228	947.65	0.00245441	385562	7.69473	0.0024639	0.000319075	23.7991	35.7661	0.372718	0	0.16	0.53
Sunagawa et al. (2015)d	-29.5022	37.9904	Indian Ocean	5.49492	surface	973902	19.478	410230	14.5318	1.38413e+06	34.0098	0.421223	0.746059	22.1656	35.3347	-	0	0.08	1.77
Sunagawa et al. (2015)d	-25.8252	-111.776	South Pacific Ocean	5.55817	surface	387346	7.74692	435.613	0.00112824	387782	7.74805	0.00112461	0.000145637	25.1487	36.4027	1.56749	0	0.2	0.38
Sunagawa et al. (2015)d	-23.281	-129.395	South Pacific Ocean	5.43925	surface	611394	12.2279	118387	4.25122	729782	16.4791	0.193635	0.347666	24.2375	36.4539	0.916543	0.01	0.14	0.8
Sunagawa et al. (2015)d	-21.3753	39.5633	Indian Ocean	5.42992	surface	521054	10.4211	151570	5.39143	672625	15.8125	0.290892	0.517358	25.0802	35.3248	0.166794	-	-	-
Sunagawa et al. (2015)d	-20.9406	-35.196	South Atlantic Ocean	5.46125	surface	609939	12.1988	193444	6.88999	803383	19.0888	0.317153	0.56481	23.3495	37.1014	0.030608	0.001	0.056	0.814
Sunagawa et al. (2015)d	-20.4368	-3.18585	South Atlantic Ocean	5.39667	surface	690082	13.8016	127001	4.24663	817083	18.0483	0.184038	0.30769	19.7768	36.3762	0.168013	0.054	0.364	1.362
Sunagawa et al. (2015)d	-17.3189	42.2853	Indian Ocean	67.0711	epipelagic	893344	17.8669	236523	8.42775	1.12987e+06	26.2946	0.264761	0.471697	25.3083	35.1633	0.820273	0.03	0	2.51
Sunagawa et al. (2015)d	-16.9598	54.0134	Indian Ocean	79.0177	epipelagic	546924	10.9385	157547	5.54555	704471	16.484	0.28806	0.506977	24.8943	34.9108	0.244232	0.03	0.18	3.22
Sunagawa et al. (2015)d	-16.957	53.9852	Indian Ocean	5.53958	surface	631044	12.6209	209950	7.42748	840994	20.0484	0.332703	0.588508	27.8684	34.5667	-	0	0.12	2.67
Sunagawa et al. (2015)d	-16.9619	-100.696	South Pacific Ocean	88.9896	epipelagic	691096	13.8219	89759.3	3.14861	780855	16.9705	0.12988	0.227798	19.8814	35.6872	1.41152	0.2	0.44	0.9
Sunagawa et al. (2015)d	-16.9604	-100.63	South Pacific Ocean	5.8897	surface	610871	12.2174	118196	4.06	729067	16.2774	0.193488	0.332312	22.7687	35.9714	2.56873	0.04	0.5	1
Sunagawa et al. (2015)d	-15.3379	43.2948	Indian Ocean	5.46283	surface	616626	12.3325	207841	7.46108	824467	19.7936	0.337062	0.604992	27.3231	35.0031	-	-	-	-
Sunagawa et al. (2015)d	-12.9945	-95.9855	South Pacific Ocean	57.6225	epipelagic	500417	10.0083	120642	4.19272	621059	14.2011	0.241083	0.418923	20.6494	35.5447	1.50198	0.16	0.78	1.9
Sunagawa et al. (2015)d	-12.9945	-95.9855	South Pacific Ocean	5.479	surface	620056	12.4011	163569	5.62856	783625	18.0297	0.263797	0.453875	25.2512	35.8353	4.59074	0.14	0.68	1.2
Sunagawa et al. (2015)d	-9.10966	-140.576	South Pacific Ocean	9.8985	surface	955605	19.1121	261009	9.03987	1.21661e+06	28.152	0.273135	0.472992	26.519	35.3967	5.11186	0.16	0.63	2.52
Sunagawa et al. (2015)d	-9.39212	66.4236	Indian Ocean	5.43733	surface	461176	9.22353	148712	5.33475	609889	14.5583	0.322463	0.578385	29.8182	34.1689	2.20176	0.01	0.08	2.12
Sunagawa et al. (2015)d	-8.98992	-139.213	South Pacific Ocean	5.8596	surface	150974	3.01949	156744	5.45002	307719	8.46951	1.03822	1.80495	26.5441	35.3662	3.98636	0.12	0.57	2.19
Sunagawa et al. (2015)d	-8.90655	-140.284	South Pacific Ocean	5.53792	surface	752776	15.0555	41390.9	1.14665	794167	16.2022	0.0549844	0.0761616	26.5762	35.3595	3.86841	0.14	0.53	2.22
Sunagawa et al. (2015)d	-8.91113	-142.557	South Pacific Ocean	5.45642	surface	947408	18.9482	152656	5.30155	1.10006e+06	24.2497	0.16113	0.279792	26.7802	35.4277	4.98594	0.19	0.56	1.8
Sunagawa et al. (2015)d	-8.70258	-17.9398	South Pacific Ocean	95.4033	epipelagic	426238	8.52476	126710	4.45253	552948	12.9773	0.297275	0.522306	24.1127	36.6033	0.241265	0.011	0.143	1.319
Sunagawa et al. (2015)d	-5.26967	-85.2287	South Atlantic Ocean	45.659	epipelagic	1.31836e+06	26.3672	260329	8.92475	1.57869e+06	35.292	0.197464	0.338479	19.5663	34.9003	20.3283	1.2	1.86	10.5
Sunagawa et al. (2015)d	-5.25233	-85.161	South Atlantic Ocean	5.4785	surface	1.22506e+06	24.5011	211425	6.97349	1.43648e+06	31.4746	0.172584	0.284619	24.9431	34.7482	11.689	0.32	1	5
Sunagawa et al. (2015)d	-2.009	-84.5897	South Atlantic Ocean	5.46492	surface	836779	16.7356	202568	6.86961	1.03935e+06	23.6052	0.24208	0.410479	23.8683	35.0193	6.72934	0.31	0.75	3.9
Sunagawa et al. (2015)d	-0.66245	73.161	Indian Ocean	5.46075	surface	1.20697e+06	24.1394	450022	15.6455	1.65699e+06	39.785	0.372852	0.648131	30.1257	35.1113	0.477267	0	0.1	1.94
Sunagawa et al. (2015)d	0.004567	71.644	Indian Ocean	5.47558	surface	699583	13.9917	306802	11.0175	1.00639e+06	25.0092	0.438549	0.787436	30.4964	35.0911	2.57579	0.02	1.94	15.14
Sunagawa et al. (2015)d	0.000467	-153.675	South Pacific Ocean	41.6574	epipelagic	665691	13.3138	189255	6.54942	854946	19.8632	0.284298	0.491926	26.0802	35.1354	4.36571	0.28	0.55	2.74
Sunagawa et al. (2015)d	-0.000383	-153.679	South Pacific Ocean	5.4465	surface	614940	12.2988	187719	6.49488	802659	18.7937	0.305263	0.528091	26.0745	35.1005	2.46716	0.27	0.54	2.67
Sunagawa et al. (2015)d	5.99968	73.9015	North Atlantic Ocean	79.0212	epipelagic	29693.9	0.593878	31026.9	1.07243	60720.8	1.66631	1.04489	1.80581	27.7234	35.1035	0.569531	0.15	0.34	3.2
Sunagawa et al. (2015)d	6.03133	73.8941	North Atlantic Ocean	5.41783	surface	997310	19.9462	189655	6.7972	1.18696e+06	26.7434	0.190166	0.340777	29.9803	34.5615	1.47882	0	0.08	2.21
Sunagawa et al. (2015)d	2.07667	-84.5203	North Pacific Ocean	29.8068	epipelagic	979382	19.5876	160069	5.59651	1.13945e+06	25.1841	0.163439	0.285716	26.532	34.3448	3.8866	0.11	0.5	3.2
Sunagawa et al. (2015)d	6.33698	-102.98	North Pacific Ocean	58.103	epipelagic	366418	7.32836	63943.4	2.18068	430361	9.50904	0.17451	0.297568	19.0484	34.6118	22.0878	0.83	1.11	8.07
Sunagawa et al. (2015)d	6.3332	-102.943	North Pacific Ocean	5.35292	surface	617033	12.3407	224402	8.02613	841435	20.3668	0.363679	0.650381	26.6362	33.407	1.18432	0	0.16	1.19
Sunagawa et al. (2015)d	7.41172	-79.3026	North Pacific Ocean	5.41025	surface	1.13291e+06	22.6583	270799	9.5547	1.40371e+06	32.213	0.239028	0.421687	26.6292	28.919	3.79669	0	0.08	0.54
Sunagawa et al. (2015)d	9.84907	-80.0384	North Pacific Ocean	5.43167	surface	578549	11.571	141727	5.02609	720276	16.5971	0.24497	0.434371	27.1194	34.3472	1.72396	0	0.01	2.93
Sunagawa et al. (2015)d	14.1749	-116.707	North Pacific Ocean	44.1742	epipelagic	4.41661e+06	88.3321	97913.6	3.36633	4.51452e+06	91.6985	0.0221694	0.0381099	18.5948	34.3727	11.0031	0.31	0.88	4.66
Sunagawa et al. (2015)d	14.2022	-116.629	North Pacific Ocean	5.37067	surface	1.02932e+06	20.5864	284027	9.88642	1.31335e+06	30.4728	0.275937	0.480241	26.4091	33.8844	3.24131	0.07	0.46	2.54
Sunagawa et al. (2015)d	14.56	70.0117	Indian Ocean	58.151	epipelagic	614766	12.2953	127474	4.43996	742240	16.7353	0.207354	0.36111	27.1177	36.4962	0.224514	0.07	0.34	1.38
Sunagawa et al. (2015)d	14.5954	69.981	Indian Ocean	5.48592	surface	741207	14.8241	250126	8.97722	991333	23.8014	0.337458	0.605581	29.0894	36.0249	1.34315	0	0.14	1.47
Sunagawa et al. (2015)d	18.3983	39.8617	Indian Ocean	60.1309	epipelagic	16782.6	0.335651	16881.9	0.60443	33664.5	0.940081	1.00592	1.80077	27.5899	38.9166	0.08645	0.27	0.09	1.35
Sunagawa et al. (2015)d	18.3967	39.8767	Indian Ocean	5.42733	surface	585001	11.7	110929	3.77818	695930	15.4782	0.189621	0.322921	27.5986	38.6469	0.927087	0.02	0.19	3.91
Sunagawa et al. (2015)d	18.5702	66.4861	Indian Ocean	25.3126	epipelagic	949965	18.9993	252785	8.89828	1.20275e+06	27.8976	0.266099	0.468347	26.8122	36.3323	0.611888	0.02	0.26	1.28
Sunagawa et al. (2015)d	18.5714	66.5305	Indian Ocean	5.38858	surface	968146	19.3629	178562	6.24596	1.14671e+06	25.6089	0.184437	0.322573	26.8177	36.2854	1.41558	0.01	0.23	1.44
Sunagawa et al. (2015)d	19.0258	64.6227	Indian Ocean	25.3365	epipelagic	2.24284e+06	44.8568	291717	10.1032	2.53456e+06	54.96	0.130066	0.225233	25.4944	-	1.23012	0.7	0.42	1.63
Sunagawa et al. (2015)d	19.0386	64.4937	Indian Ocean	5.45433	surface	1.91215e+06	38.243	293912	10.3122	2.20606e+06	48.5552	0.153708	0.26965	26.2314	36.6179	0.889376	0.01	0.32	1.18
Sunagawa et al. (2015)d	20.8183	63.5046	Indian Ocean	5.47242	surface	2.44866e+06	48.9732	236509	8.35371	2.68517e+06	57.3269	0.0965871	0.170577	25.5814	36.5301	-	0.05	0.37	1.2
Sunagawa et al. (2015)d	21.98	38.235	Indian Ocean	5.374	surface	771437	15.4287	219755	7.76387	991192	23.1926	0.284865	0.503208	27.3295	38.9374	0.000271	0	0.053	1.15
Sunagawa et al. (2015)d	23.36	37.2183	Indian Ocean	5.42533	surface	651100	13.022	208223	7.44803	859323	20.47	0.319802	0.571958	25.8244	39.7473	0.541919	0.014	0.018	0.87
Sunagawa et al. (2015)d	23.38	37.2917	Indian Ocean	85.4737	epipelagic	324213	6.48426	29759.3	1.05882	353972	7.54308	0.0917893	0.163291	26.0504	40.1964	1.20106	0.01	0.025	0.85
Sunagawa et al. (2015)d	25.5101	-88.383	North Pacific Ocean	5.443	surface	525647	10.5129	91226.6	3.23079	616873	13.7437	0.173551	0.307316	24.9656	36.1937	2.2118	0.02	0	1.22
Sunagawa et al. (2015)d	27.155	34.83	Indian Ocean	5.43008	surface	678074	13.5615	205915	7.37311	883989	20.9346	0.303677	0.543681	25.0621	39.9819	0.137284	0.014	0.024	0.82
Sunagawa et al. (2015)d	31.6962	-64.2472	North Atlantic Ocean	6.0535	surface	364093	7.28185	47611.8	1.65019	411704	8.93204	0.130768	0.226617	20.3973	36.5996	-	0.09	0	0.73
Sunagawa et al. (2015)d	31.5206	-158.998	North Pacific Ocean	5.45342	surface	537913	10.7583	122270	4.37056	660183	15.1288	0.227304	0.406252	25.1739	35.1818	0.979589	0	0.01	2.43
Sunagawa et al. (2015)d	33.9179	32.8944	North Atlantic Ocean	5.3955	surface	268797	5.37595	37642.6	1.31421	306440	6.69016	0.140041	0.244461	20.4537	39.4251	0.74885	0	0	0.82
Sunagawa et al. (2015)d	33.9253	32.7741	North Atlantic Ocean	69.0713	epipelagic	646716	12.9343	48703.4	1.73096	695419	14.6653	0.0753088	0.133827	18.9795	39.256	0.254406	0.01	0	0.67
Sunagawa et al. (2015)d	34.0964	-49.8906	North Atlantic Ocean	5.53067	surface	433737	8.67474	62094	1.98899	495831	10.6637	0.14316	0.229285	18.7327	36.4072	1.17612	0.25	0.06	0.8
Sunagawa et al. (2015)d	35.4171	-127.695	North Pacific Ocean	47.2148	epipelagic	899797	17.9959	105403	3.48071	1.0052e+06	21.4766	0.117141	0.193417	13.1598	33.2414	4.83272	0.08	0.46	2.84
Sunagawa et al. (2015)d	34.6775	-71.3023	North Atlantic Ocean	11.6915	epipelagic	365604	7.31208	31624	0.999309	397228	8.31139	0.0864979	0.136665	19.1288	36.4626	0.859819	0.22	0.02	0.94
Sunagawa et al. (2015)d	35.4068	-127.743	North Pacific Ocean	5.4605	surface	1.17018e+06	23.4035	175896	6.12953	1.34607e+06	29.5331	0.150316	0.261906	19.2497	33.099	0.673592	0	0.29	1.91
Sunagawa et al. (2015)d	35.7512	-37.0512	North Atlantic Ocean	39.7792	epipelagic	694003	13.8801	120550	4.13478	814553	18.0148	0.173703	0.297894	17.6636	36.2402	1.21028	0.04	0	0.84
Sunagawa et al. (2015)d	35.907	-37.261	North Atlantic Ocean	5.53017	surface	660227	13.2045	153963	5.27736	814189	18.4819	0.233196	0.399663	17.5831	36.3123	0.328716	0.04	0.01	0.84
Sunagawa et al. (2015)d	36.1558	-29.0089	North Atlantic Ocean	5.40208	surface	444143	8.88286	70454.7	2.41713	514598	11.3	0.158631	0.272112	17.2601	36.2377	0.334082	0.02	0.01	0.65
Sunagawa et al. (2015)d	36.1944	-28.8829	North Atlantic Ocean	77.5699	epipelagic	271485	5.42971	12594.6	0.424042	284080	5.85375	0.0463914	0.0780966	16.7511	36.1629	1.56535	0.01	0.01	0.63
Sunagawa et al. (2015)d	39.2302	-70.0325	North Atlantic Ocean	5.52908	surface	397520	7.95039	30538.8	0.840491	428058	8.79088	0.0768233	0.105717	14.1189	35.1833	3.47819	0.11	0.35	2.77
Sunagawa et al. (2015)d	36.5533	-6.56683	North Atlantic Ocean	10	surface	894124	17.8825	55815.1	1.96852	949939	19.851	0.0624243	0.110081	20.5251	36.6324	-	-	-	-
Sunagawa et al. (2015)d	36.573	-6.53867	North Atlantic Ocean	38.689	epipelagic	1.2826e+06	25.6519	63273.4	2.04765	1.34587e+06	27.6996	0.0493323	0.0798244	16.2463	36.5564	-	-	-	-
Sunagawa et al. (2015)d	43.6876	-16.8515	North Atlantic Ocean	5.41367	surface	659297	13.1859	111578	3.76455	770875	16.9505	0.169238	0.285497	14.2806	35.986	2.99923	0.31	0.16	1.24
Sunagawa et al. (2015)d	43.7904	-16.8871	North Atlantic Ocean	23.8569	epipelagic	688577	13.7715	83407.8	2.79991	771985	16.5714	0.121131	0.203311	14.3067	35.9984	3.8344	0.32	0.17	1.26
Boyv et al. (2022)e	-11.737	47.415	Indian Ocean	2	surface	888000	17.76	57112.2	2.05563	945112	19.8156	0.0643155	0.115745	27.4	35.02	0.133	-	0.13	-
Boyv et al. (2022)e	-11.737	47.415	Indian Ocean	2	surface	1000000	20	23303	0.835467	1023303	20.8355	0.023303	0.0417733	27.6	34.95	0.16	-	0.1	-
Boyv et al. (2022)e	-11.811	47.506	Indian Ocean	2	surface	275000	5.5	39921.4	1.43646	314921	6.93646	0.145169	0.261174	27	35.06	0.307	-	0.114	-
Boyv et al. (2022)e	-11.811	47.506	Indian Ocean	2	surface	931000	18.62	22241	0.795965	953241	19.416	0.0238894	0.0427479	27.7	35.19	0.13	-	0.105	-
Boyv et al. (2022)e	-11.641	47.46	Indian Ocean	2	surface	1090000	21.8	29226.6	1.05127	1.11923e+06	22.8513	0.0268134	0.0482233	27.8	35.07	0.444	-	0.142	-
Boyv et al. (2022)e	-11.641	47.46	Indian Ocean	2	surface	722000	14.44	8227.8	0.295272	730228	14.7353	0.0113958	0.0204482	28.4	34.97	0.196	-	0.109	-
Boyv et al. (2022)e	-11.803	47.493	Indian Ocean	2	surface	825000	16.5	53017.6	1.90805	878018	18.408	0.0642638	0.115639	27.8	34.99	0.117	-	0.199	-
Boyv et al. (2022)e	-11.803	47.493	Indian Ocean	2	surface	999000	19.98	25426.4	0.914468	1.02443e+06	20.8945	0.0254519	0.0457692	27.9	34.97	0.182	-	0.13	-
Boyv et al. (2022)e	-11.596	47.478	Indian Ocean	2	surface	564000	11.28	9315.3	0.33484	573315	11.6148	0.0165165	0.0296844	27.3	35.02	0.268	-	0.216	-
Boyv et al. (2022)e	-11.596	47.478	Indian Ocean	2	surface	733000	14.66	11062.2	0.396161	744062	15.0562	0.0150917	0.0270233	28.6	35.48	0.213	-	0.099	-
Hahnke et al. (2013)f	59.3479	-29.9982	North Atlantic Ocean	10	epipelagic	874618	17.4924	25553.7	6.51618	900171	24.0085	0.0292169	0.372516	10.9626	35.0649	5.437	-	0.432	-
Hahnke et al. (2013)f	59.3479	-29.9982	North Atlantic Ocean	20	epipelagic	858296	17.1659	24877	6.34363	883173	23.5096	0.0289841	0.369548	10.9623	35.064	5.44	-	0.438	-
Hahnke et al. (2013)f	59.3479	-29.9982	North Atlantic Ocean	30	epipelagic	807277	16.1455	22333.8	5.69513	829611	21.8407	0.0276657	0.352737	10.9633	35.0639	5.437	-	0.432	-
Hahnke et al. (2013)f	59.3479	-29.9982	North Atlantic Ocean	40	epipelagic	851436	17.0287	22770	5.80635	874206	22.8351	0.0267431	0.340974	10.9655	35.0642	5.42	-	0.429	-
Hahnke et al. (2013)f	59.3479	-29.9982	North Atlantic Ocean	50	epipelagic	576134	11.5227	8395.81	2.14093	584530	13.6636	0.0145727	0.185801	10.8346	35.0763	6.542	-	0.526	-
Hahnke et al. (2013)f	57.8597	-30.0021	North Atlantic Ocean	10	epipelagic	675548	13.511	8361.81	2.13226	683910	15.6432	0.0123778	0.157817	11.7587	35.0983	4.529	-	0.335	-
Hahnke et al. (2013)f	57.8597	-30.0021	North Atlantic Ocean	20	epipelagic	706087	14.1217	7895.13	2.01326	713982	16.135	0.0111815	0.142564	11.7456	35.0975	4.837	-	0.361	-
Hahnke et al. (2013)f	57.8597	-30.0021	North Atlantic Ocean	30	epipelagic	767767	15.3553	8495.99	2.16648	776263	17.5218	0.0110658	0.14109	11.7307	35.0987	4.966	-	0.363	-
Hahnke et al. (2013)f	57.8597	-30.0021	North Atlantic Ocean	40	epipelagic	686110	13.7222	7370.08	1.87937	693480	15.6016	0.0107418	0.136958	11.7011	35.1047	5.068	-	0.369	-
Hahnke et al. (2013)f	57.8597	-30.0021	North Atlantic Ocean	50	epipelagic	619462	12.3892	6000.93	1.53024	625463	13.9195	0.00968732	0.123513	11.6876	35.1096	5.179	-	0.378	-
Hahnke et al. (2013)f	57.8597	-30.0021	North Atlantic Ocean	60	epipelagic	422521	8.45042	2541.67	0.648125	425062	9.09854	0.00601548	0.0766974	10.8786	35.2063	10.581	-	0.701	-
Hahnke et al. (2013)f	55.2529	-30.0035	North Atlantic Ocean	10	epipelagic	841547	16.8309	32298.7	8.23616	873846	25.0671	0.0383801	0.489346	12.7253	34.8795	2.072	-	0.25	-
Hahnke et al. (2013)f	55.2529	-30.0035	North Atlantic Ocean	20	epipelagic	910247	18.2049	34523.7	8.80355	944770	27.0085	0.0379279	0.483581	12.7196	34.8786	2.059	-	0.236	-
Hahnke et al. (2013)f	55.2529	-30.0035	North Atlantic Ocean	30	epipelagic	953177	19.0635	31133.4	7.93901	984310	27.0025	0.0326627	0.41645	12.7217	34.8869	2.147	-	0.246	-
Hahnke et al. (2013)f	55.2529	-30.0035	North Atlantic Ocean	40	epipelagic	966978	19.3396	33163	8.45657	1.00014e+06	27.7961	0.0342955	0.437268	12.7159	34.9203	2.164	-	0.246	-
Hahnke et al. (2013)f	55.2529	-30.0035	North Atlantic Ocean	50	epipelagic	553155	11.0631	5492.85	1.40068	558648	12.4638	0.00993004	0.126608	11.8805	34.9385	-	-	-	-
Hahnke et al. (2013)f	53.5582	-30.0018	North Atlantic Ocean	10	epipelagic	846030	16.9206	23149.7	5.90317	869179	22.8238	0.0273627	0.348875	12.4313	34.7962	2.473	-	0.298	-
Hahnke et al. (2013)f	53.5582	-30.0018	North Atlantic Ocean	20	epipelagic	811666	16.2333	20158.7	5.14047	831825	21.3738	0.0248362	0.316661	12.4205	34.798	2.451	-	0.267	-
Hahnke et al. (2013)f	53.5582	-30.0018	North Atlantic Ocean	30	epipelagic	876913	17.5383	23291.8	5.93942	900205	23.4777	0.0265612	0.338655	12.4013	34.7964	2.466	-	0.267	-
Hahnke et al. (2013)f	53.5582	-30.0018	North Atlantic Ocean	40	epipelagic	815125	16.3025	18269.9	4.65882	833395	20.9613	0.0224136	0.285773	12.3955	34.7957	2.453	-	0.276	-
Hahnke et al. (2013)f	53.5582	-30.0018	North Atlantic Ocean	50	epipelagic	781408	15.6282	18438.8	4.7019	799847	20.3301	0.0235969	0.300861	11.221	34.8313	2.641	-	0.285	-
Hahnke et al. (2013)f	53.5582	-30.0018	North Atlantic Ocean	60	epipelagic	345767	6.91534	1541.15	0.392994	347308	7.30833	0.0044572	0.0568293	8.8988	34.8789	11.329	-	0.798	-
Hahnke et al. (2013)f	50.8449	-29.9975	North Atlantic Ocean	10	epipelagic	800017	16.0003	70264.1	4.02474	870281	20.0251	0.0878283	0.251541	14.2452	35.16	2.069	-	0.16	-
Hahnke et al. (2013)f	50.8449	-29.9975	North Atlantic Ocean	20	epipelagic	1.05165e+06	21.0329	64469.4	3.92963	1.11612e+06	24.9626	0.0613033	0.186832	14.1714	35.1456	1.261	-	0.135	-
Hahnke et al. (2013)f	50.8449	-29.9975	North Atlantic Ocean	30	epipelagic	1.04578e+06	20.9156	58593.2	3.83902	1.10437e+06	24.7546	0.0560283	0.183548	14.0782	35.1498	1.301	-	0.143	-
Hahnke et al. (2013)f	50.8449	-29.9975	North Atlantic Ocean	40	epipelagic	676983	13.5397	20438.6	2.39323	697422	15.9329	0.0301908	0.176757	14.2081	35.3146	1.912	-	0.176	-
Hahnke et al. (2013)f	50.8449	-29.9975	North Atlantic Ocean	50	epipelagic	529651	10.593	12062.1	1.2422	541713	11.8352	0.0227737	0.117266	13.865	35.413	4.127	-	0.294	-
Hahnke et al. (2013)f	49.4389	-30.0021	North Atlantic Ocean	5	epipelagic	754576	15.0915	109446	5.05397	864022	20.1455	0.145043	0.334888	16.0254	35.4135	1.372	-	0.166	-
Hahnke et al. (2013)f	49.4389	-30.0021	North Atlantic Ocean	51	epipelagic	763338	15.2668	108715	5.24769	872054	20.5145	0.142421	0.343733	16.0262	35.4135	1.419	-	0.143	-
Hahnke et al. (2013)f	49.4389	-30.0021	North Atlantic Ocean	5	epipelagic	630601	12.612	84331.9	3.91004	714933	16.5221	0.133733	0.310025	15.4203	35.8585	2.586	-	0.21	-
Hahnke et al. (2013)f	49.4389	-30.0021	North Atlantic Ocean	10.8	epipelagic	420658	8.41316	27005.6	1.37123	447664	9.7844	0.0641984	0.162987	15.1866	35.927	5.91	-	0.37	-
Hahnke et al. (2013)f	49.4389	-30.0021	North Atlantic Ocean	32.5	epipelagic	248671	4.97341	6628.38	0.396811	255299	5.37022	0.0266553	0.0797864	15.0718	35.9158	7.704	-	0.476	-
Hahnke et al. (2013)f	46.7413	-30.0028	North Atlantic Ocean	94	surface	434218	8.68436	30425.9	1.38944	464644	10.0738	0.0700705	0.159993	18.3651	35.9878	0.272	-	0.051	-
Hahnke et al. (2013)f	46.7413	-30.0028	North Atlantic Ocean	7	epipelagic	438111	8.76222	36422.2	1.60186	474533	10.3641	0.0831347	0.182814	18.3732	35.9879	0.27	-	0.056	-
Hahnke et al. (2013)f	46.7413	-30.0028	North Atlantic Ocean	10.8	epipelagic	314001	6.28002	32807.4	1.41525	346808	7.69527	0.104482	0.225358	15.8407	36.1218	5.805	-	0.331	-
Hahnke et al. (2013)f	46.7413	-30.0028	North Atlantic Ocean	100	epipelagic	208951	4.17902	325.976	0.0831239	209277	4.26214	0.00156006	0.0198908	15.3361	36.0541	6.457	-	0.383	-
Hahnke et al. (2013)f	45.3632	-30.0019	North Atlantic Ocean	5	surface	378729	7.57459	52998.8	2.2174	431728	9.79199	0.139938	0.292743	18.6314	35.7007	0.053	-	0.059	-
Hahnke et al. (2013)f	45.3632	-30.0019	North Atlantic Ocean	90	epipelagic	384159	7.68317	57362.1	2.46195	441521	10.1451	0.149319	0.320434	18.5758	35.6944	0.049	-	0.048	-
Hahnke et al. (2013)f	45.3632	-30.0019	North Atlantic Ocean	5	epipelagic	370850	7.417	55233.5	2.31469	426084	9.73169	0.148937	0.312079	18.4524	35.6849	0.054	-	0.038	-
Hahnke et al. (2013)f	45.3632	-30.0019	North Atlantic Ocean	90	epipelagic	376061	7.52122	57094.3	2.47457	433155	9.99579	0.151822	0.329011	18.3903	35.6784	0.052	-	0.05	-
Hahnke et al. (2013)f	45.3632	-30.0019	North Atlantic Ocean	4	epipelagic	395014	7.90029	62029	2.60376	457043	10.504	0.15703	0.329577	18.3763	35.6761	0.158	-	0.051	-
Hahnke et al. (2013)f	45.3632	-30.0019	North Atlantic Ocean	11	epipelagic	299962	5.99924	20071.5	0.999732	320033	6.99897	0.0669134	0.166643	18.2162	35.7248	5.669	-	0.34	-
Hahnke et al. (2013)f	45.3632	-30.0019	North Atlantic Ocean	33	epipelagic	201731	4.03461	7973.21	0.348056	209704	4.38267	0.039524	0.0862675	15.2288	35.9838	6.959	-	0.413	-
Hahnke et al. (2013)f	42.7008	-30.0032	North Atlantic Ocean	54	surface	708497	14.1699	79405.5	3.47561	787902	17.6455	0.112076	0.245281	19.8774	36.0546	0.065	-	0.035	-
Hahnke et al. (2013)f	42.7008	-30.0032	North Atlantic Ocean	63	epipelagic	700585	14.0117	91264.4	3.88575	791849	17.8975	0.130269	0.277322	19.8833	36.0547	0.027	-	0.029	-
Hahnke et al. (2013)f	42.7008	-30.0032	North Atlantic Ocean	77	epipelagic	706599	14.132	83887.1	3.67106	790486	17.803	0.11872	0.25977	19.8896	36.0546	0.029	-	0.023	-
Hahnke et al. (2013)f	42.7008	-30.0032	North Atlantic Ocean	89	epipelagic	339097	6.78193	39612.6	1.71448	378709	8.49641	0.116818	0.252801	19.8854	36.0545	0.014	-	0.031	-
Hahnke et al. (2013)f	42.7008	-30.0032	North Atlantic Ocean	4	epipelagic	322861	6.45722	19240.9	0.692671	342102	7.14989	0.0595949	0.107271	15.3956	36.0201	3.669	-	0.227	-
Hahnke et al. (2013)f	41.1934	-29.9982	North Atlantic Ocean	9.7	surface	502673	10.0535	71161.1	2.68858	573835	12.742	0.141565	0.267428	21.134	36.073	0.065	-	0.016	-
Hahnke et al. (2013)f	41.1934	-29.9982	North Atlantic Ocean	29.3	epipelagic	516086	10.3217	68530.6	2.55519	584617	12.8769	0.132789	0.247555	21.1352	36.073	0.038	-	0.008	-
Hahnke et al. (2013)f	41.1934	-29.9982	North Atlantic Ocean	39.2	epipelagic	517965	10.3593	70364.3	2.61357	588329	12.9729	0.135848	0.252293	21.1345	36.0721	0.032	-	0.043	-
Hahnke et al. (2013)f	41.1934	-29.9982	North Atlantic Ocean	47.9	epipelagic	531469	10.6294	80797.2	3.07099	612267	13.7004	0.152026	0.288915	21.0974	36.0692	0.035	-	0.035	-
Hahnke et al. (2013)f	41.1934	-29.9982	North Atlantic Ocean	56.1	epipelagic	667925	13.3585	105404	4.72516	773329	18.0837	0.157808	0.35372	18.8868	36.1001	0.067	-	0.028	-
Hahnke et al. (2013)f	41.1934	-29.9982	North Atlantic Ocean	68.6	epipelagic	614440	12.2888	75582.4	3.65954	690022	15.9483	0.12301	0.297795	16.6622	36.0649	0.349	-	0.045	-
Hahnke et al. (2013)f	41.1934	-29.9982	North Atlantic Ocean	78.5	epipelagic	571904	11.4381	69398.7	3.1705	641303	14.6086	0.121347	0.277188	16.1379	36.0545	0.913	-	0.083	-
Hahnke et al. (2013)f	41.1934	-29.9982	North Atlantic Ocean	95.4	epipelagic	352130	7.0426	41158.3	1.60498	393288	8.64758	0.116884	0.227896	15.426	36.0524	4.396	-	0.265	-
Hahnke et al. (2013)f	38.4762	-29.9982	North Atlantic Ocean	95	surface	568479	11.3696	76512.8	2.75446	644991	14.124	0.134592	0.242266	22.4256	36.3817	0.04	-	0.036	-
Hahnke et al. (2013)f	38.4762	-29.9982	North Atlantic Ocean	5	epipelagic	580679	11.6136	47146	1.69726	627825	13.3108	0.0811913	0.146144	22.4309	36.3819	0.035	-	0.016	-
Hahnke et al. (2013)f	38.4762	-29.9982	North Atlantic Ocean	20	epipelagic	590868	11.8174	51671.2	1.86016	642539	13.6775	0.0874497	0.157409	22.4321	36.3822	0.014	-	0	-
Hahnke et al. (2013)f	38.4762	-29.9982	North Atlantic Ocean	40	epipelagic	579345	11.5869	84358.6	3.03691	663704	14.6238	0.14561	0.262099	22.0597	36.3576	0.026	-	0.025	-
Hahnke et al. (2013)f	38.4762	-29.9982	North Atlantic Ocean	60	epipelagic	619492	12.3898	112742	4.05873	732234	16.4486	0.181992	0.327585	19.3287	36.2582	0.118	-	0	-
Hahnke et al. (2013)f	38.4762	-29.9982	North Atlantic Ocean	100	epipelagic	486160	9.72319	43729.9	1.57428	529889	11.2975	0.0899496	0.161909	17.2175	36.2173	0.882	-	0.024	-
Hahnke et al. (2013)f	36.7767	-29.9993	North Atlantic Ocean	40	surface	588476	11.7695	26460.6	0.952581	614937	12.7221	0.0449646	0.0809362	22.6661	36.3774	0.046	-	0.033	-
Hahnke et al. (2013)f	36.7767	-29.9993	North Atlantic Ocean	60	epipelagic	571956	11.4391	27388.8	0.985998	599345	12.4251	0.0478863	0.0861953	22.4833	36.3712	0.026	-	0.016	-
Hahnke et al. (2013)f	36.7767	-29.9993	North Atlantic Ocean	100	epipelagic	596678	11.9336	27411.6	0.986817	624089	12.9204	0.0459404	0.0826927	22.438	36.3692	0.02	-	0.019	-
Hahnke et al. (2013)f	36.7767	-29.9993	North Atlantic Ocean	20	epipelagic	624285	12.4857	33602.2	1.20968	657888	13.6954	0.0538251	0.0968851	20.8019	36.3097	0.018	-	0.033	-
Hahnke et al. (2013)f	36.7767	-29.9993	North Atlantic Ocean	40	epipelagic	634507	12.6901	68108.4	2.4519	702615	15.142	0.107341	0.193213	19.2098	36.2775	0.035	-	0.021	-
Hahnke et al. (2013)f	36.7767	-29.9993	North Atlantic Ocean	60	epipelagic	591791	11.8358	107606	3.87383	699397	15.7096	0.181832	0.327297	17.7497	36.2566	0.01	-	0.015	-
Hahnke et al. (2013)f	36.7767	-29.9993	North Atlantic Ocean	90	epipelagic	554146	11.0829	92018.7	3.31267	646165	14.3956	0.166055	0.298899	16.9986	36.2311	-0.008	-	0.032	-
Hahnke et al. (2013)f	36.7767	-29.9993	North Atlantic Ocean	100	epipelagic	330976	6.61951	30731.9	1.10635	361708	7.72586	0.0928525	0.167135	16.1073	36.196	2.983	-	0.147	-
Hahnke et al. (2013)f	34.0739	-30.0016	North Atlantic Ocean	60	surface	563222	11.2644	49327.4	1.77579	612549	13.0402	0.0875807	0.157645	23.6794	36.465	0.027	-	0.029	-
Hahnke et al. (2013)f	34.0739	-30.0016	North Atlantic Ocean	90	epipelagic	586612	11.7322	38503.3	1.38612	625115	13.1184	0.0656368	0.118146	23.5949	36.4613	0.023	-	0.016	-
Hahnke et al. (2013)f	34.0739	-30.0016	North Atlantic Ocean	100	epipelagic	582017	11.6403	33300.3	1.19881	615317	12.8391	0.0572153	0.102988	23.3431	36.4527	0.027	-	0.016	-
Hahnke et al. (2013)f	34.0739	-30.0016	North Atlantic Ocean	20	epipelagic	640465	12.8093	47759.2	1.71933	688224	14.5286	0.0745696	0.134225	22.455	36.4106	0.017	-	0.005	-
Hahnke et al. (2013)f	34.0739	-30.0016	North Atlantic Ocean	40	epipelagic	647086	12.9417	104709	3.76951	751794	16.7112	0.161816	0.291268	18.673	36.2815	0.035	-	0.008	-
Hahnke et al. (2013)f	34.0739	-30.0016	North Atlantic Ocean	60	epipelagic	568078	11.3616	83737.1	3.01453	651815	14.3761	0.147404	0.265327	16.9911	36.2555	0.276	-	0.011	-
Hahnke et al. (2013)f	34.0739	-30.0016	North Atlantic Ocean	90	epipelagic	189151	3.78303	8644.78	0.311212	197796	4.09424	0.045703	0.0822654	15.5973	36.1425	5.181	-	0.275	-
Ferreira et al. (2022)g	-31.156	-34.829	South Atlantic Ocean	20	epipelagic	852000	17.04	3707	0.751249	855707	17.7912	0.00435094	0.0440874	22.42	35.85	0.06	0.01	0.01	0.5
Ferreira et al. (2022)g	-31.156	-34.829	South Atlantic Ocean	40	epipelagic	948000	18.96	37488	1.33313	985488	20.2931	0.0395443	0.0703126	16.55	35.74	-	0.01	-	-
Ferreira et al. (2022)g	-31.368	-34.844	South Atlantic Ocean	60	epipelagic	539000	10.78	5719	1.25195	544719	12.032	0.0106104	0.116137	23.71	35.75	0.38	0.01	-	0.53
Ferreira et al. (2022)g	-31.368	-34.844	South Atlantic Ocean	100	epipelagic	668000	13.36	5455	1.21284	673455	14.5728	0.00816617	0.0907813	23.66	35.75	0.01	0.01	0.01	0.53
Ferreira et al. (2022)g	-31.368	-34.844	South Atlantic Ocean	20	epipelagic	768000	15.36	4761	0.938773	772761	16.2988	0.00619922	0.061118	22.3	35.8	0.06	0.01	0.01	0.49
Ferreira et al. (2022)g	-31.368	-34.844	South Atlantic Ocean	40	epipelagic	842000	16.84	4791	0.924942	846791	17.7649	0.00569002	0.0549253	20.75	35.91	0.13	0.01	0.01	0.48
Ferreira et al. (2022)g	-31.368	-34.844	South Atlantic Ocean	60	epipelagic	652000	13.04	4342	0.86601	656342	13.906	0.00665951	0.0664118	20.48	35.93	0.15	0.01	0.01	0.72
Ferreira et al. (2022)g	-31.368	-34.844	South Atlantic Ocean	75	epipelagic	616000	12.32	3906	0.729448	619906	13.0494	0.00634091	0.0592085	19.98	35.92	0.05	0.01	0.01	0.73
Ferreira et al. (2022)g	-31.368	-34.844	South Atlantic Ocean	20	epipelagic	462000	9.24	29711	1.10711	491711	10.3471	0.0643095	0.119817	17.51	35.83	0.11	0.01	0.03	1.04
Ferreira et al. (2022)g	-31.368	-34.844	South Atlantic Ocean	40	epipelagic	206000	4.12	27355	1.02073	233355	5.14073	0.132791	0.247749	16.58	35.71	2.01	0.07	0.31	1.19
Ferreira et al. (2022)g	-31.204	-34.761	South Atlantic Ocean	60	epipelagic	224000	4.48	3754	0.761546	227754	5.24155	0.0167589	0.169988	23.38	35.83	0.15	0.01	0.01	0.6
Ferreira et al. (2022)g	-31.204	-34.761	South Atlantic Ocean	100	epipelagic	395000	7.9	43849	1.67102	438849	9.57102	0.11101	0.211522	17.39	35.78	0.87	0.06	0.26	0.81
Ferreira et al. (2022)g	-30.669	-35.774	South Atlantic Ocean	20	epipelagic	201000	4.02	4545	0.977663	205545	4.99766	0.0226119	0.2432	24.26	35.72	0.4	0.01	0.01	0.59
Ferreira et al. (2022)g	-30.669	-35.774	South Atlantic Ocean	40	epipelagic	214000	4.28	31485	1.13143	245485	5.41143	0.147126	0.264353	17.7	35.87	0.27	0.03	0.08	0.74
Ferreira et al. (2022)g	-30.781	-35.963	South Atlantic Ocean	60	epipelagic	722000	14.44	3448	0.647372	725448	15.0874	0.00477562	0.0448319	24.19	35.71	0.12	0.01	0.01	0.56
Ferreira et al. (2022)g	-30.781	-35.963	South Atlantic Ocean	100	epipelagic	367000	7.34	42043	1.43558	409043	8.77558	0.114559	0.195583	17.62	35.83	0.25	0.11	0.09	0.65
Ferreira et al. (2022)g	-30.899	-35.949	South Atlantic Ocean	20	epipelagic	405000	8.1	5413	1.13552	410413	9.23552	0.0133654	0.140187	23.93	35.46	-	0.01	0.01	0.4
Ferreira et al. (2022)g	-30.899	-35.949	South Atlantic Ocean	40	epipelagic	503000	10.06	7889	1.84915	510889	11.9091	0.0156839	0.183812	23.54	35.83	0.83	0.01	0.01	0.47
Ferreira et al. (2022)g	-30.899	-35.949	South Atlantic Ocean	60	epipelagic	454000	9.08	4652	0.93832	458652	10.0183	0.0102467	0.103339	22.88	35.91	0.83	0.01	0.01	0.48
Ferreira et al. (2022)g	-30.899	-35.949	South Atlantic Ocean	100	epipelagic	480000	9.6	5982	1.20517	485982	10.8052	0.0124625	0.125539	22.64	35.92	0.47	0.01	0.01	0.49
Ferreira et al. (2022)g	-30.899	-35.949	South Atlantic Ocean	20	epipelagic	565000	11.3	10140	0.802772	575140	12.1028	0.0179469	0.0710417	19.15	35.91	0.37	0.01	0.05	0.56
Ferreira et al. (2022)g	-30.899	-35.949	South Atlantic Ocean	40	epipelagic	465000	9.3	28020	1.2012	493020	10.5012	0.0602581	0.129162	18.58	35.87	0.52	0.01	0.07	0.6
Ferreira et al. (2022)g	-30.899	-35.949	South Atlantic Ocean	60	epipelagic	403000	8.06	41160	1.70714	444160	9.76714	0.102134	0.211803	17.26	35.79	1.4	0.1	0.13	0.78
Ferreira et al. (2022)g	-30.899	-35.949	South Atlantic Ocean	70	epipelagic	223000	4.46	12524	0.784647	235524	5.24465	0.0561614	0.17593	16.26	35.7	4.3	0.03	0.28	1.18
Ferreira et al. (2022)g	-30.863	-35.999	South Atlantic Ocean	100	epipelagic	296000	5.92	2408	0.398171	298408	6.31817	0.00813514	0.0672585	24.74	36.12	0.05	0.01	0.01	0.42
Ferreira et al. (2022)g	-30.083	-36.083	South Atlantic Ocean	20	epipelagic	129000	2.58	4634	0.948273	133634	3.52827	0.0359225	0.367548	24.47	35.83	1.78	-	-	0.75
Ferreira et al. (2022)g	-30.083	-36.083	South Atlantic Ocean	40	epipelagic	263000	5.26	4160	0.835016	267160	6.09502	0.0158175	0.158748	24.47	35.83	1.07	0.01	0.04	-
Ferreira et al. (2022)g	-30.083	-36.083	South Atlantic Ocean	50	epipelagic	406000	8.12	3329	0.578297	409329	8.6983	0.00819951	0.0712188	23.12	35.9	0.12	0.01	0.01	0.48
Ferreira et al. (2022)g	-30.083	-36.083	South Atlantic Ocean	60	epipelagic	266000	5.32	4267	0.786482	270267	6.10648	0.0160414	0.147835	23.01	35.91	0.2	0.01	0.01	0.55
Ferreira et al. (2022)g	-30.083	-36.083	South Atlantic Ocean	100	epipelagic	288000	5.76	5350	0.786901	293350	6.5469	0.0185764	0.136615	21.93	35.89	0.13	0.01	0.02	0.46
Ferreira et al. (2022)g	-30.083	-36.083	South Atlantic Ocean	20	epipelagic	241000	4.82	5513	0.631041	246513	5.45104	0.0228755	0.130921	19.21	35.89	0	0.01	0.01	0.45
Ferreira et al. (2022)g	-30.083	-36.083	South Atlantic Ocean	40	epipelagic	159000	3.18	18020	0.923756	177020	4.10376	0.113333	0.290489	19.1	35.89	0.15	0.01	0.05	0.57
Ferreira et al. (2022)g	-30.083	-36.083	South Atlantic Ocean	60	epipelagic	158000	3.16	54540	2.17062	212540	5.33062	0.34519	0.686905	18.14	35.84	0.35	0.04	0.1	0.52
Ferreira et al. (2022)g	-30.083	-36.083	South Atlantic Ocean	100	epipelagic	141000	2.82	38787	1.40833	179787	4.22833	0.275085	0.499407	17.06	35.81	-	0.01	-	-
Ferreira et al. (2022)g	-31.046	-36.199	South Atlantic Ocean	20	epipelagic	120000	2.4	56073	2.0156	176073	4.4156	0.467275	0.839832	17.69	35.83	0.24	0.01	0.01	0.47
Ferreira et al. (2022)g	-30.936	-36.262	South Atlantic Ocean	40	epipelagic	351000	7.02	4714	0.94629	355714	7.96629	0.0134302	0.134799	24.19	35.79	0.13	0.01	0.01	0.68
Ferreira et al. (2022)g	-30.936	-36.262	South Atlantic Ocean	60	epipelagic	918000	18.36	45068	1.69279	963068	20.0528	0.0490937	0.0921997	17.54	35.82	-	0.01	-	-
Ferreira et al. (2022)g	-30.742	-35.899	South Atlantic Ocean	100	epipelagic	235000	4.7	5649	1.2227	240649	5.9227	0.0240383	0.260149	23.86	35.72	0.1	0.01	0.01	-
Giebel et al. (2021)h	-30.0008	176.999	South Pacific Ocean	20	epipelagic	293000	5.86	34605	4.61621	327605	10.4762	0.118106	0.787749	23.459	35.918	0.25	0.07	0.04	0.1
Giebel et al. (2021)h	-30.0008	176.999	South Pacific Ocean	40	epipelagic	305000	6.1	31155	6.04731	336155	12.1473	0.102148	0.991362	23.106	36.011	0.30213	0.0179	0.04	0.1
Giebel et al. (2021)h	-30.0008	176.999	South Pacific Ocean	60	epipelagic	310000	6.2	55650	7.01749	365650	13.2175	0.179516	1.13185	23.099	36.02	0.25	0.07	0.1274	0.1
Giebel et al. (2021)h	-30.0008	176.999	South Pacific Ocean	100	epipelagic	293000	5.86	108724	5.67698	401724	11.537	0.371072	0.968768	19.49	35.864	0.25	0.07	0.0203	0.1
Giebel et al. (2021)h	-26.9928	178.213	South Pacific Ocean	40	epipelagic	365000	7.3	126173	9.0677	491173	16.3677	0.345679	1.24215	25.218	35.637	0.20705	0.1129	0.04	0.1
Giebel et al. (2021)h	-26.9928	178.213	South Pacific Ocean	60	epipelagic	271000	5.42	121881	9.97473	392881	15.3947	0.449745	1.84036	24.866	35.727	0.25	0.07	0.0289	0.1
Giebel et al. (2021)h	-26.9928	178.213	South Pacific Ocean	100	epipelagic	244000	4.88	63762	2.9161	307762	7.7961	0.26132	0.59756	21.454	35.882	0.22607	0.0939	0.0275	0.1
Giebel et al. (2021)h	-15	-178	South Pacific Ocean	20	epipelagic	377000	7.54	4537	4.39451	381537	11.9345	0.0120345	0.582826	28.677	35.17	0.31571	0.0043	0.0496	0.1
Giebel et al. (2021)h	-15	-178	South Pacific Ocean	40	epipelagic	395000	7.9	8079	6.47578	403079	14.3758	0.0204532	0.819718	28.647	35.344	0.1	0.3493	0.0429	0.1
Giebel et al. (2021)h	-15	-178	South Pacific Ocean	60	epipelagic	446000	8.92	57926	9.74908	503926	18.6691	0.129879	1.09295	27.304	35.795	0.1035	0.07	0.0309	0.1
Giebel et al. (2021)h	-15	-178	South Pacific Ocean	90	epipelagic	375000	7.5	234068	9.92539	609068	17.4254	0.624181	1.32338	24.615	36.157	0.313	0.007	0.0576	0.1
Giebel et al. (2021)h	-15	-178	South Pacific Ocean	100	epipelagic	254000	5.08	133673	7.28758	387673	12.3676	0.526272	1.43456	24.008	36.19	1.1	0.0776	0.2371	0.1
Giebel et al. (2021)h	-10.3333	-176.475	South Pacific Ocean	20	epipelagic	405000	8.1	50795	17.6767	455795	25.7767	0.12542	2.18231	29.893	34.692	0.25	0.07	0.0362	0.1
Giebel et al. (2021)h	-10.3333	-176.475	South Pacific Ocean	40	epipelagic	412000	8.24	166299	49.5475	578299	57.7875	0.403638	6.01304	30.085	35.01	0.25	0.07	0.0978	0.1
Giebel et al. (2021)h	-10.3333	-176.475	South Pacific Ocean	60	epipelagic	505000	10.1	197537	45.8339	702537	55.9339	0.391162	4.53801	29.027	35.737	1.8	0.7323	0.5211	0.1
Giebel et al. (2021)h	-10.3333	-176.475	South Pacific Ocean	90	epipelagic	327000	6.54	144299	13.3118	471299	19.8518	0.441281	2.03544	27.422	36.041	0.8	1.8108	0.3878	0.1
Giebel et al. (2021)h	-10.3333	-176.475	South Pacific Ocean	100	epipelagic	270000	5.4	110178	6.75125	380178	12.1512	0.408067	1.25023	26.762	36.033	4.9	1.4087	0.5842	0.0802
Giebel et al. (2021)h	-4.9965	-178.318	South Pacific Ocean	20	epipelagic	485000	9.7	77149	7.04477	562149	16.7448	0.15907	0.726264	30.428	34.557	0.26291	0.5829	0.0509	0.1
Giebel et al. (2021)h	-4.9965	-178.318	South Pacific Ocean	40	epipelagic	463000	9.26	96849	8.23146	559849	17.4915	0.209177	0.888926	30.383	34.805	0.20977	0.1102	0.04	0.1
Giebel et al. (2021)h	-4.9965	-178.318	South Pacific Ocean	60	epipelagic	508000	10.16	180989	15.6444	688989	25.8044	0.356278	1.53981	29.98	35.128	0.1127	0.07	0.0482	0.1
Giebel et al. (2021)h	-4.9965	-178.318	South Pacific Ocean	90	epipelagic	400000	8	197973	19.0036	597973	27.0036	0.494932	2.37545	29.047	35.544	2.39249	0.07	0.2711	0.1
Giebel et al. (2021)h	-4.9965	-178.318	South Pacific Ocean	100	epipelagic	252000	5.04	139382	7.24554	391382	12.2855	0.553103	1.43761	28.651	35.578	3.63175	0.07	0.3657	0.1
Giebel et al. (2021)h	0.0001	180	Noth Pacific Ocean	20	epipelagic	719000	14.38	189309	61.5356	908309	75.9156	0.263295	4.27925	29.429	35.189	0.9	0.1286	0.1625	0.1
Giebel et al. (2021)h	0.0001	180	Noth Pacific Ocean	40	epipelagic	659000	13.18	214342	46.6636	873342	59.8436	0.325253	3.54049	29.227	35.204	1.4	0.2771	0.2167	0.1
Giebel et al. (2021)h	0.0001	180	Noth Pacific Ocean	60	epipelagic	604000	12.08	156786	22.0963	760786	34.1763	0.259579	1.82916	28.875	35.238	1.9	0.5551	0.374	0.1
Giebel et al. (2021)h	0.0001	180	Noth Pacific Ocean	100	epipelagic	341000	6.82	45043	2.41494	386043	9.23494	0.132091	0.354097	22.948	35.43	11.3	0.0557	0.6803	3.0289
Giebel et al. (2021)h	4.6551	179.398	Noth Pacific Ocean	20	epipelagic	454000	9.08	17686	4.40674	471686	13.4867	0.0389559	0.485324	28.843	34.321	0.01522	0.0206	0.0079	0.1
Giebel et al. (2021)h	4.6551	179.398	Noth Pacific Ocean	40	epipelagic	432000	8.64	18705	3.0304	450705	11.6704	0.0432986	0.350741	28.782	34.345	0.2022	0.1178	0.04	0.1
Giebel et al. (2021)h	4.6551	179.398	Noth Pacific Ocean	60	epipelagic	443000	8.86	75351	5.49959	518351	14.3596	0.170093	0.620721	28.725	34.402	0.6	0.0044	0.2313	0.1
Giebel et al. (2021)h	4.6551	179.398	Noth Pacific Ocean	75	epipelagic	436000	8.72	183703	9.14203	619703	17.862	0.421337	1.0484	28.584	34.45	0.25	0.07	0.1192	0.1
Giebel et al. (2021)h	11	179	Noth Pacific Ocean	20	epipelagic	465000	9.3	2916	1.53512	467916	10.8351	0.00627097	0.165067	27.828	34.597	0.06689	0.3869	0.04	0.1
Giebel et al. (2021)h	11	179	Noth Pacific Ocean	40	epipelagic	467000	9.34	7565	2.13232	474565	11.4723	0.0161991	0.2283	27.825	34.598	0.25196	0.068	0.04	0.1
Giebel et al. (2021)h	11	179	Noth Pacific Ocean	60	epipelagic	463000	9.26	11894	1.94985	474894	11.2099	0.025689	0.210567	27.802	34.603	0.25	0.07	0.04	0.1
Giebel et al. (2021)h	11	179	Noth Pacific Ocean	100	epipelagic	492000	9.84	147755	7.74937	639755	17.5894	0.300315	0.787537	27.094	34.594	0.2767	0.0433	0.04	0.1
Giebel et al. (2021)h	15.9999	179	Noth Pacific Ocean	20	epipelagic	476000	9.52	6310	3.27094	482310	12.7909	0.0132563	0.343586	26.648	35.091	0.50415	0.07	0.04	0.1
Giebel et al. (2021)h	15.9999	179	Noth Pacific Ocean	40	epipelagic	561000	11.22	16770	4.11096	577770	15.331	0.029893	0.366396	25.839	35.132	1.08664	0.07	0.04	0.1
Giebel et al. (2021)h	15.9999	179	Noth Pacific Ocean	60	epipelagic	580000	11.6	42277	5.58368	622277	17.1837	0.0728914	0.481352	25.27	35.202	0.25	0.07	0.0255	0.1
Giebel et al. (2021)h	15.9999	179	Noth Pacific Ocean	100	epipelagic	421000	8.42	173755	8.42808	594755	16.8481	0.41272	1.00096	23.892	35.441	0.9533	0.07	0.1112	0.1
Giebel et al. (2021)h	22.0002	178.317	Noth Pacific Ocean	20	epipelagic	527000	10.54	15638	4.80351	542638	15.3435	0.0296736	0.455741	25.037	35.516	0.25	0.07	6.3285	0.1
Giebel et al. (2021)h	22.0002	178.317	Noth Pacific Ocean	40	epipelagic	542000	10.84	17238	4.42709	559238	15.2671	0.0318044	0.408403	24.842	35.539	0.25	0.07	0.04	0.1
Giebel et al. (2021)h	22.0002	178.317	Noth Pacific Ocean	60	epipelagic	598000	11.96	31578	5.48476	629578	17.4448	0.052806	0.458592	23.201	35.567	0.25	0.07	0.04	0.1
Giebel et al. (2021)h	22.0002	178.317	Noth Pacific Ocean	100	epipelagic	389000	7.78	154891	9.12483	543891	16.9048	0.398177	1.17286	21.134	35.4	1.72878	0.07	0.04	0.1
Giebel et al. (2021)h	28	177.333	Noth Pacific Ocean	20	epipelagic	687000	13.74	23778	8.71019	710778	22.4502	0.0346114	0.63393	20.782	35.081	0.25	0.07	1.5574	0.1
Giebel et al. (2021)h	28	177.333	Noth Pacific Ocean	40	epipelagic	692000	13.84	84171	28.3328	776171	42.1728	0.121634	2.04717	18.764	34.976	0.25	0.07	0.04	0.1
Giebel et al. (2021)h	28	177.333	Noth Pacific Ocean	60	epipelagic	736000	14.72	183675	44.6311	919675	59.3511	0.249558	3.032	17.743	34.923	2.5	0.079	0.001	0.2323
Giebel et al. (2021)h	28	177.333	Noth Pacific Ocean	70	epipelagic	607000	12.14	105505	15.7218	712505	27.8618	0.173814	1.29504	17.452	34.895	1.3	0.2632	0.0592	0.484
Giebel et al. (2021)h	28	177.333	Noth Pacific Ocean	100	epipelagic	420000	8.4	10799	1.49809	430799	9.89809	0.0257119	0.178344	17.125	34.871	2.6	0.0158	2.1818	1.9107
Giebel et al. (2021)h	34	177.333	Noth Pacific Ocean	20	epipelagic	1380000	27.6	27842	38.9586	1407842	66.5586	0.0201754	1.41154	15.678	34.761	0.56432	0.07	0.0287	0.1869
Giebel et al. (2021)h	34	177.333	Noth Pacific Ocean	40	epipelagic	1270000	25.4	26189	35.6927	1296189	61.0927	0.0206213	1.40522	15.548	34.752	0.2	0.3859	0.1285	0.203
Giebel et al. (2021)h	34	177.333	Noth Pacific Ocean	50	epipelagic	1280000	25.6	25357	36.8631	1305357	62.4631	0.0198102	1.43996	15.532	34.751	0.88949	0.07	0.061	0.1225
Giebel et al. (2021)h	34	177.333	Noth Pacific Ocean	60	epipelagic	1060000	21.2	12620	14.2448	1072620	35.4448	0.0119057	0.671925	15.526	34.75	1.6	0.0922	0.1311	1.3778
Giebel et al. (2021)h	34	177.333	Noth Pacific Ocean	100	epipelagic	567000	11.34	1501	0.679913	568501	12.0199	0.00264727	0.0599571	15.142	34.746	3.4	0.5087	0.1729	3.9367
Giebel et al. (2021)h	39.9706	177.327	Noth Pacific Ocean	20	epipelagic	1770000	35.4	96576	105.017	1866576	140.417	0.0545627	2.96658	11.585	34.331	5.84637	0.0361	0.4137	12.6756
Giebel et al. (2021)h	39.9706	177.327	Noth Pacific Ocean	40	epipelagic	1530000	30.6	47109	54.6487	1577109	85.2487	0.0307902	1.7859	11.356	34.327	6.89911	0.0708	0.4647	13.2711
Giebel et al. (2021)h	39.9706	177.327	Noth Pacific Ocean	60	epipelagic	1030000	20.6	15461	14.8056	1045461	35.4056	0.0150107	0.71872	10.884	34.274	8.30477	0.1883	0.6041	14.7517
Giebel et al. (2021)h	39.9706	177.327	Noth Pacific Ocean	100	epipelagic	535000	10.7	2784	0.92332	537784	11.6233	0.00520374	0.0862916	10.199	34.272	10.7751	0.07	0.7912	17.9705
Giebel et al. (2021)h	45.0001	178.75	Noth Pacific Ocean	20	epipelagic	887000	17.74	36607	21.6437	923607	39.3837	0.0412706	1.22005	5.86	33.31	15.5	0.1803	1.2617	27.16
Giebel et al. (2021)h	45.0001	178.75	Noth Pacific Ocean	40	epipelagic	829000	16.58	21564	20.1875	850564	36.7675	0.0260121	1.21758	5.96	33.371	15.2	0.2257	1.3157	25.5668
Giebel et al. (2021)h	45.0001	178.75	Noth Pacific Ocean	60	epipelagic	972000	19.44	24374	24.0586	996374	43.4986	0.0250761	1.23758	5.702	33.381	13.1	0.2631	1.1086	24.1505
Giebel et al. (2021)h	45.0001	178.75	Noth Pacific Ocean	100	epipelagic	654000	13.08	6125	7.38202	660125	20.462	0.00936544	0.564374	5.489	33.417	15.1	0.5648	1.1978	24.3597
Giebel et al. (2021)h	47.4998	179.133	Noth Pacific Ocean	20	epipelagic	1070000	21.4	28914	14.2578	1098914	35.6578	0.0270224	0.666252	4.466	33.089	21.6	0.2524	1.7104	38.0555
Giebel et al. (2021)h	47.4998	179.133	Noth Pacific Ocean	40	epipelagic	1090000	21.8	26502	14.0016	1116502	35.8016	0.0243138	0.642274	4.439	33.091	21.5	0.1883	1.6784	37.6854
Giebel et al. (2021)h	47.4998	179.133	Noth Pacific Ocean	60	epipelagic	869000	17.38	16982	14.8069	885982	32.1869	0.019542	0.851953	3.473	33.112	22	1.3978	1.744	37.283
Giebel et al. (2021)h	47.4998	179.133	Noth Pacific Ocean	100	epipelagic	472000	9.44	4299	3.60595	476299	13.0459	0.00910805	0.381986	2.725	33.138	23.8	0.3378	1.9518	40.711
Giebel et al. (2021)h	50	179.55	Noth Pacific Ocean	20	epipelagic	908000	18.16	18657	6.56665	926657	24.7266	0.0205474	0.3616	4.803	33.072	23	0.191	1.9989	37.2026
Giebel et al. (2021)h	50	179.55	Noth Pacific Ocean	40	epipelagic	844000	16.88	12144	4.25372	856144	21.1337	0.0143886	0.251998	4.573	33.086	23.3	0.992	1.7456	39.7293
Giebel et al. (2021)h	50	179.55	Noth Pacific Ocean	60	epipelagic	672000	13.44	5137	2.82277	677137	16.2628	0.00764435	0.210027	3.397	33.127	26	0.3912	1.9095	43.286
Giebel et al. (2021)h	50	179.55	Noth Pacific Ocean	100	epipelagic	476000	9.52	2028	1.78157	478028	11.3016	0.0042605	0.187139	2.954	33.35	29.5	0.0655	2.2936	53.0549
Giebel et al. (2021)h	54.0015	179.581	Noth Pacific Ocean	20	epipelagic	2160000	43.2	48386	15.3246	2208386	58.5246	0.0224009	0.354736	4.63	33.197	21.3	0.2015	1.9744	41.2288
Giebel et al. (2021)h	54.0015	179.581	Noth Pacific Ocean	40	epipelagic	1660000	33.2	28089	12.9923	1688089	46.1923	0.0169211	0.391333	3.893	33.216	23.5	0.2947	1.9832	42.1379
Giebel et al. (2021)h	54.0015	179.581	Noth Pacific Ocean	60	epipelagic	484000	9.68	5282	3.45553	489282	13.1355	0.0109132	0.356976	2.764	33.24	25.7	1.3938	2.0929	48.5682
Giebel et al. (2021)h	54.0015	179.581	Noth Pacific Ocean	100	epipelagic	393000	7.86	1948	1.11977	394948	8.97977	0.00495674	0.142464	2.555	33.244	26.7	0.1244	2.3106	48.2211
Giebel et al. (2021)h	56.9999	179.583	Noth Pacific Ocean	20	epipelagic	2130000	42.6	47644	23.7229	2177644	66.3229	0.0223681	0.556875	4.153	33.171	21.9	0.2574	1.9729	43.5099
Giebel et al. (2021)h	56.9999	179.583	Noth Pacific Ocean	40	epipelagic	633000	12.66	17149	13.0824	650149	25.7424	0.0270916	1.03336	2.778	33.219	24.6	0.3878	2.3788	46.6838
Giebel et al. (2021)h	56.9999	179.583	Noth Pacific Ocean	60	epipelagic	438000	8.76	6500	6.04773	444500	14.8077	0.0148402	0.690381	2.51	33.224	25.6	0.3586	2.1912	47.8078
Giebel et al. (2021)h	56.9999	179.583	Noth Pacific Ocean	100	epipelagic	349000	6.98	2707	2.33347	351707	9.31347	0.00775645	0.334307	2.259	33.224	25.9	0.0605	2.6847	47.5599
Giebel et al. (2021)h	58.9	-179	Noth Pacific Ocean	20	epipelagic	910000	18.2	30049	28.5102	940049	46.7102	0.0330209	1.5665	5.365	32.9	17.2	0.1882	1.8194	30.484
Giebel et al. (2021)h	58.9	-179	Noth Pacific Ocean	40	epipelagic	659000	13.18	21176	11.1732	680176	24.3532	0.0321335	0.847737	4.964	32.974	18.6	0.1669	1.8735	37.4764
Giebel et al. (2021)h	58.9	-179	Noth Pacific Ocean	60	epipelagic	894000	17.88	25780	14.9779	919780	32.8579	0.0288367	0.83769	4.138	33.048	18.9	0.1802	1.932	39.5923
Giebel et al. (2021)h	58.9	-179	Noth Pacific Ocean	100	epipelagic	349000	6.98	2228	2.29852	351228	9.27852	0.00638395	0.329302	3.353	33.106	25.1	0.0019	2.157	49.0476
Giebel et al. (2021)h	-30.0954	179.822	South Pacific Ocean	20	epipelagic	579000	11.58	5173	2.92442	584173	14.5044	0.00893437	0.252541	24.01	35.837	0.25	0.07	0.04	0.1
Giebel et al. (2021)h	-30.0954	179.822	South Pacific Ocean	40	epipelagic	535000	10.7	7852	3.02357	542852	13.7236	0.0146766	0.282577	23.554	35.799	0.25	0.07	0.04	0.1
Giebel et al. (2021)h	-30.0954	179.822	South Pacific Ocean	60	epipelagic	495000	9.9	13110	4.25077	508110	14.1508	0.0264848	0.429371	20.877	35.671	0	0.481	0.0282	0.1
Giebel et al. (2021)h	-30.0954	179.822	South Pacific Ocean	100	epipelagic	483000	9.66	60905	5.56438	543905	15.2244	0.126097	0.576023	18.501	35.559	0.5894	0.0126	0.0757	0.1
Giebel et al. (2021)h	-34.7327	-179.264	South Pacific Ocean	20	epipelagic	706000	14.12	4140	1.3368	710140	15.4568	0.00586402	0.0946742	21.869	35.653	0.0134	0.07	0.04	0.1
Giebel et al. (2021)h	-34.7327	-179.264	South Pacific Ocean	40	epipelagic	762000	15.24	4988	1.60923	766988	16.8492	0.00654593	0.105593	20.605	35.561	0.9085	0.07	0.04	0.1
Giebel et al. (2021)h	-34.7327	-179.264	South Pacific Ocean	60	epipelagic	805000	16.1	8180	3.318	813180	19.418	0.0101615	0.206087	18.844	35.482	0.2116	0.0203	0.014	0.1
Giebel et al. (2021)h	-34.7327	-179.264	South Pacific Ocean	100	epipelagic	733000	14.66	39522	4.23013	772522	18.8901	0.0539181	0.288549	16.463	35.427	1.5574	1.3881	0.2104	0.1
Giebel et al. (2021)h	-40.5893	179.256	South Pacific Ocean	20	epipelagic	1180000	23.6	14864	7.65309	1194864	31.2531	0.0125966	0.324284	19.006	35.269	0.25	0.07	0.0229	0.1
Giebel et al. (2021)h	-40.5893	179.256	South Pacific Ocean	40	epipelagic	1380000	27.6	32569	22.1796	1412569	49.7796	0.0236007	0.803608	19.001	35.269	0.25	0.07	0.04	0.1
Giebel et al. (2021)h	-40.5893	179.256	South Pacific Ocean	60	epipelagic	902000	18.04	31501	13.8753	933501	31.9153	0.0349235	0.769138	17.362	35.19	0.3631	0.0546	0.1377	0.1
Giebel et al. (2021)h	-40.5893	179.256	South Pacific Ocean	100	epipelagic	443000	8.86	3585	1.67868	446585	10.5387	0.00809255	0.189467	14.805	35.223	6.3812	0.07	0.4777	0.3707
Giebel et al. (2021)h	-45.95	179.38	South Pacific Ocean	20	epipelagic	2240000	44.8	43838	94.2368	2283838	139.037	0.0195705	2.1035	14.538	34.3	4.7717	0.0278	0.4254	0.1
Giebel et al. (2021)h	-45.95	179.38	South Pacific Ocean	40	epipelagic	1320000	26.4	45211	84.4763	1365211	110.876	0.0342508	3.19986	14.015	34.256	6.6441	0.0171	0.6178	0.1
Giebel et al. (2021)h	-45.95	179.38	South Pacific Ocean	60	epipelagic	912000	18.24	14705	19.615	926705	37.855	0.0161239	1.07538	12.685	34.245	8.6908	0.0492	0.6626	0.1
Giebel et al. (2021)h	-45.95	179.38	South Pacific Ocean	100	epipelagic	488000	9.76	2001	3.66025	490001	13.4202	0.00410041	0.375025	9.486	34.394	13.7062	0.092	0.9635	0.184
Giebel et al. (2021)h	-50.4801	179.446	South Pacific Ocean	20	epipelagic	1180000	23.6	20152	38.3339	1200152	61.9339	0.017078	1.62432	9.875	33.982	14.7476	0.1051	2.0076	0.1
Giebel et al. (2021)h	-50.4801	179.446	South Pacific Ocean	40	epipelagic	1140000	22.8	6878	5.32253	1146878	28.1225	0.00603333	0.233444	9.846	33.983	15.575	0.0996	1.4259	0.1
Giebel et al. (2021)h	-50.4801	179.446	South Pacific Ocean	60	epipelagic	1100000	22	8578	11.2014	1108578	33.2014	0.00779818	0.509156	8.925	33.985	16.0935	1.283	1.5462	0.2721
Giebel et al. (2021)h	-50.4801	179.446	South Pacific Ocean	100	epipelagic	514000	10.28	5805	9.32305	519805	19.603	0.0112938	0.906911	7.147	34.08	19.7045	0.2792	1.2495	4.2314
Giebel et al. (2021)h	-52.1235	177.528	South Pacific Ocean	20	epipelagic	1060000	21.2	7667	8.04069	1067667	29.2407	0.00723302	0.379278	9.228	34.07	16.9129	0.1486	1.4619	0.1
Giebel et al. (2021)h	-52.1235	177.528	South Pacific Ocean	40	epipelagic	1010000	20.2	7796	6.62174	1017796	26.8217	0.00771881	0.327809	9.227	34.071	16.0184	0.1703	1.9943	0.1044
Giebel et al. (2021)h	-52.1235	177.528	South Pacific Ocean	60	epipelagic	1010000	20.2	7528	7.42186	1017528	27.6219	0.00745347	0.367419	9.222	34.074	17.0005	0.796	1.8996	0.1
Giebel et al. (2021)h	-52.1235	177.528	South Pacific Ocean	100	epipelagic	490000	9.8	3118	3.23428	493118	13.0343	0.00636327	0.330028	7.231	34.096	20.2352	1.2911	3.228	4.3991
Atlantic Meridional Transect Project (AMT 2)i	-47.5886	-55.597	South Atlantic Ocean	88.5	epipelagic	13195.1	0.263903	3625.34	0.00938962	16820.5	0.273292	0.274748	0.0355799	5.242	34.072	-	-	-	-
Atlantic Meridional Transect Project (AMT 2)i	-47.5886	-55.597	South Atlantic Ocean	78.4	epipelagic	106062	2.12124	19366.2	3.42671	125428	5.54795	0.182593	1.61542	5.905	34.06	-	-	-	-
Atlantic Meridional Transect Project (AMT 2)i	-47.5886	-55.597	South Atlantic Ocean	69.9	epipelagic	160346	3.20692	39044.9	3.47767	199391	6.68459	0.243504	1.08443	6.442	34.05	-	-	-	-
Atlantic Meridional Transect Project (AMT 2)i	-47.5886	-55.597	South Atlantic Ocean	60.1	epipelagic	259727	5.19454	54874.1	19.4695	314601	24.664	0.211276	3.74806	7.034	34.026	-	-	-	-
Atlantic Meridional Transect Project (AMT 2)i	-47.5886	-55.597	South Atlantic Ocean	49.9	epipelagic	243859	4.87719	48317.2	13.5316	292177	18.4088	0.198135	2.77446	7.284	33.984	-	-	-	-
Atlantic Meridional Transect Project (AMT 2)i	-47.5886	-55.597	South Atlantic Ocean	40	epipelagic	259727	5.19454	60354.8	10.0424	320082	15.2369	0.232378	1.93325	7.329	33.977	-	-	-	-
Atlantic Meridional Transect Project (AMT 2)i	-47.5886	-55.597	South Atlantic Ocean	30.3	epipelagic	273089	5.46178	66251	10.5315	339340	15.9933	0.242598	1.92822	7.328	33.978	-	-	-	-
Atlantic Meridional Transect Project (AMT 2)i	-47.5886	-55.597	South Atlantic Ocean	7.7	surface	276430	5.5286	36464.2	9.53333	312894	15.0619	0.131911	1.72437	7.335	33.976	-	-	-	-
Atlantic Meridional Transect Project (AMT 2)i	-43.4293	-54.7312	South Atlantic Ocean	6.2	surface	455984	9.11968	136811	3.19419	592795	12.3139	0.300035	0.350253	12.839	34.03	-	-	-	-
Atlantic Meridional Transect Project (AMT 2)i	-43.4293	-54.7312	South Atlantic Ocean	19.3	epipelagic	536992	10.7398	172413	36.2827	709405	47.0225	0.321073	3.37833	12.718	34.013	-	-	-	-
Atlantic Meridional Transect Project (AMT 2)i	-43.4293	-54.7312	South Atlantic Ocean	29.3	epipelagic	718216	14.3643	216788	2.76654	935004	17.1309	0.301842	0.192598	12.621	34.003	-	-	-	-
Atlantic Meridional Transect Project (AMT 2)i	-43.4293	-54.7312	South Atlantic Ocean	39.9	epipelagic	555365	11.1073	89515	0.732994	644880	11.8403	0.161182	0.0659921	10.909	33.928	-	-	-	-
Atlantic Meridional Transect Project (AMT 2)i	-43.4293	-54.7312	South Atlantic Ocean	49.8	epipelagic	405041	8.10081	103956	11.7762	508996	19.877	0.256655	1.4537	9.781	33.976	-	-	-	-
Atlantic Meridional Transect Project (AMT 2)i	-43.4293	-54.7312	South Atlantic Ocean	59.5	epipelagic	457654	9.15308	84562.5	0.349316	542217	9.5024	0.184774	0.0381637	8.696	34.048	-	-	-	-
Atlantic Meridional Transect Project (AMT 2)i	-43.4293	-54.7312	South Atlantic Ocean	69.6	epipelagic	455984	9.11968	71085.7	12.0429	527070	21.1626	0.155895	1.32054	7.844	34.045	-	-	-	-
Atlantic Meridional Transect Project (AMT 2)i	-43.4293	-54.7312	South Atlantic Ocean	79.7	epipelagic	417568	8.35135	84906.6	5.3999	502474	13.7512	0.203336	0.64659	6.706	34.082	-	-	-	-
Atlantic Meridional Transect Project (AMT 2)i	-43.4293	-54.7312	South Atlantic Ocean	89.7	epipelagic	335724	6.71449	54094.3	0.140104	389819	6.85459	0.161127	0.020866	6.243	34.08	-	-	-	-
Atlantic Meridional Transect Project (AMT 2)i	-43.4293	-54.7312	South Atlantic Ocean	99.3	epipelagic	299814	5.99627	35091.1	0.0908861	334905	6.08716	0.117043	0.0151571	5.991	34.108	-	-	-	-
Atlantic Meridional Transect Project (AMT 2)i	-39.3514	-53.3012	South Atlantic Ocean	5.8	surface	217135	4.3427	62723	0.563372	279858	4.90608	0.288866	0.129729	19.102	35.897	-	-	-	-
Atlantic Meridional Transect Project (AMT 2)i	-39.3514	-53.3012	South Atlantic Ocean	18.7	epipelagic	155335	3.1067	37961.1	0.532649	193296	3.63935	0.244382	0.171452	19.106	35.897	-	-	-	-
Atlantic Meridional Transect Project (AMT 2)i	-39.3514	-53.3012	South Atlantic Ocean	28.6	epipelagic	216300	4.326	41885.2	11.8066	258185	16.1326	0.193644	2.72921	19.105	35.897	-	-	-	-
Atlantic Meridional Transect Project (AMT 2)i	-39.3514	-53.3012	South Atlantic Ocean	38.6	epipelagic	202103	4.04205	57269.7	0.616069	259372	4.65812	0.283369	0.152415	19.106	35.897	-	-	-	-
Atlantic Meridional Transect Project (AMT 2)i	-39.3514	-53.3012	South Atlantic Ocean	48.5	epipelagic	236343	4.72687	54281.6	18.5259	290625	23.2527	0.229673	3.91927	19.107	35.897	-	-	-	-
Atlantic Meridional Transect Project (AMT 2)i	-39.3514	-53.3012	South Atlantic Ocean	58.4	epipelagic	212959	4.25919	48562	0.526696	261521	4.78588	0.228034	0.123661	19.107	35.896	-	-	-	-
Atlantic Meridional Transect Project (AMT 2)i	-39.3514	-53.3012	South Atlantic Ocean	68.3	epipelagic	273089	5.46178	47941.4	22.5978	321031	28.0596	0.175552	4.13744	19.105	35.897	-	-	-	-
Atlantic Meridional Transect Project (AMT 2)i	-39.3514	-53.3012	South Atlantic Ocean	78.2	epipelagic	237178	4.74357	50973	0.59976	288151	5.34333	0.214914	0.126436	19.105	35.897	-	-	-	-
Atlantic Meridional Transect Project (AMT 2)i	-39.3514	-53.3012	South Atlantic Ocean	98.1	epipelagic	227157	4.54314	46724.8	0.521937	273882	5.06507	0.205694	0.114885	19.106	35.897	-	-	-	-
Atlantic Meridional Transect Project (AMT 2)i	44.1281	-20.0183	North Atlantic Ocean	8.5	surface	1.62851e+06	32.5703	282212	2.26779	1.91073e+06	34.8381	0.173294	0.0696276	13.61	35.629	-	-	-	-
Atlantic Meridional Transect Project (AMT 2)i	44.1281	-20.0183	North Atlantic Ocean	20.5	epipelagic	1.97509e+06	39.5019	426632	34.0897	2.40173e+06	73.5916	0.216006	0.862988	13.607	35.63	-	-	-	-
Atlantic Meridional Transect Project (AMT 2)i	44.1281	-20.0183	North Atlantic Ocean	30.3	epipelagic	2.02103e+06	40.4205	317089	31.4805	2.33812e+06	71.9011	0.156895	0.778825	13.607	35.63	-	-	-	-
Atlantic Meridional Transect Project (AMT 2)i	44.1281	-20.0183	North Atlantic Ocean	40.6	epipelagic	2.03355e+06	40.6711	437476	45.8461	2.47103e+06	86.5172	0.215129	1.12724	13.605	35.63	-	-	-	-
Atlantic Meridional Transect Project (AMT 2)i	44.1281	-20.0183	North Atlantic Ocean	50.5	epipelagic	2.20058e+06	44.0116	323206	2.47419	2.52379e+06	46.4858	0.146873	0.0562168	13.597	35.631	-	-	-	-
Atlantic Meridional Transect Project (AMT 2)i	44.1281	-20.0183	North Atlantic Ocean	60.7	epipelagic	1340392	26.8078	238136	1.3852	1.57853e+06	28.193	0.177662	0.0516716	12.534	35.661	-	-	-	-
Atlantic Meridional Transect Project (AMT 2)i	44.1281	-20.0183	North Atlantic Ocean	70.5	epipelagic	595034	11.9007	110766	0.336998	705800	12.2377	0.18615	0.0283176	12.416	35.666	-	-	-	-
Atlantic Meridional Transect Project (AMT 2)i	44.1281	-20.0183	North Atlantic Ocean	81	epipelagic	227157	4.54314	65694.6	0.196543	292851	4.73968	0.289204	0.0432615	12.338	35.665	-	-	-	-
Atlantic Meridional Transect Project (AMT 2)i	44.1281	-20.0183	North Atlantic Ocean	100.7	epipelagic	254716	5.09432	42449.4	5.65795	297166	10.7523	0.166654	1.11064	12.289	35.665	-	-	-	-
Atlantic Meridional Transect Project (AMT 2)i	46.4932	-14.0643	North Atlantic Ocean	6.8	surface	1.10655e+06	22.1311	166918	1.30098	1.27347e+06	23.4321	0.150845	0.0587851	12.367	35.553	-	-	-	-
Atlantic Meridional Transect Project (AMT 2)i	46.4932	-14.0643	North Atlantic Ocean	20	epipelagic	1.08568e+06	21.7135	116205	1.16963	1.20188e+06	22.8831	0.107035	0.0538665	12.345	35.556	-	-	-	-
Atlantic Meridional Transect Project (AMT 2)i	46.4932	-14.0643	North Atlantic Ocean	28.8	epipelagic	1.26941e+06	25.3881	168248	1.17078	1.43765e+06	26.5589	0.132541	0.0461154	12.338	35.556	-	-	-	-
Atlantic Meridional Transect Project (AMT 2)i	46.4932	-14.0643	North Atlantic Ocean	39.8	epipelagic	1.13578e+06	22.7157	140274	14.7341	1.27606e+06	37.4498	0.123504	0.648633	12.285	35.559	-	-	-	-
Atlantic Meridional Transect Project (AMT 2)i	46.4932	-14.0643	North Atlantic Ocean	49.7	epipelagic	1.24435e+06	24.887	188102	1.12197	1.43245e+06	26.009	0.151165	0.0450827	12.282	35.559	-	-	-	-
Atlantic Meridional Transect Project (AMT 2)i	46.4932	-14.0643	North Atlantic Ocean	59.8	epipelagic	1.236e+06	24.72	227565	29.5189	1.46356e+06	54.2389	0.184114	1.19413	12.273	35.559	-	-	-	-
Atlantic Meridional Transect Project (AMT 2)i	46.4932	-14.0643	North Atlantic Ocean	69.2	epipelagic	1173365	23.4673	206660	22.2632	1.38003e+06	45.7305	0.176126	0.948692	12.159	35.56	-	-	-	-
Atlantic Meridional Transect Project (AMT 2)i	46.4932	-14.0643	North Atlantic Ocean	79.6	epipelagic	734919	14.6984	92452.4	0.446594	827371	15.145	0.125799	0.0303839	11.917	35.561	-	-	-	-
Atlantic Meridional Transect Project (AMT 2)i	46.4932	-14.0643	North Atlantic Ocean	99.7	epipelagic	379987	7.59973	89365.8	0.243151	469352	7.84288	0.235182	0.0319947	11.589	35.571	-	-	-	-
Atlantic Meridional Transect Project (AMT 2)i	30.9119	-21.2637	North Atlantic Ocean	6.6	surface	498993	9.97987	101933	0.5079	600927	10.4878	0.204278	0.0508925	19.07	36.617	-	-	-	-
Atlantic Meridional Transect Project (AMT 2)i	30.9119	-21.2637	North Atlantic Ocean	28.6	epipelagic	446797	8.93595	73781.8	10.379	520579	19.315	0.165135	1.16149	19.062	36.624	-	-	-	-
Atlantic Meridional Transect Project (AMT 2)i	30.9119	-21.2637	North Atlantic Ocean	48.6	epipelagic	532399	10.648	108223	0.570964	640621	11.2189	0.203274	0.0536218	19.052	36.628	-	-	-	-
Atlantic Meridional Transect Project (AMT 2)i	30.9119	-21.2637	North Atlantic Ocean	59	epipelagic	549101	10.982	90660.7	0.492068	639762	11.4741	0.165107	0.0448067	18.931	36.626	-	-	-	-
Atlantic Meridional Transect Project (AMT 2)i	30.9119	-21.2637	North Atlantic Ocean	69.4	epipelagic	553277	11.0655	70406	10.9126	623683	21.9782	0.127253	0.986183	18.189	36.61	-	-	-	-
Atlantic Meridional Transect Project (AMT 2)i	30.9119	-21.2637	North Atlantic Ocean	79.9	epipelagic	549101	10.982	107749	0.429415	656850	11.4114	0.196228	0.0391016	17.819	36.537	-	-	-	-
Atlantic Meridional Transect Project (AMT 2)i	30.9119	-21.2637	North Atlantic Ocean	88.6	epipelagic	482291	9.64581	120109	8.28521	602400	17.931	0.24904	0.858944	17.851	36.582	-	-	-	-
Atlantic Meridional Transect Project (AMT 2)i	30.9119	-21.2637	North Atlantic Ocean	99.6	epipelagic	413392	8.26784	61405.5	0.215837	474797	8.48368	0.148541	0.0261056	17.743	36.567	-	-	-	-
Atlantic Meridional Transect Project (AMT 2)i	35.6666	-20.4205	North Atlantic Ocean	7.2	surface	572068	11.4414	106384	0.489358	678452	11.9307	0.185964	0.042771	16.959	36.108	-	-	-	-
Atlantic Meridional Transect Project (AMT 2)i	35.6666	-20.4205	North Atlantic Ocean	30.3	epipelagic	574155	11.4831	135147	14.3023	709303	25.7854	0.235384	1.24551	16.949	36.108	-	-	-	-
Atlantic Meridional Transect Project (AMT 2)i	35.6666	-20.4205	North Atlantic Ocean	39.8	epipelagic	490642	9.81284	95316.1	0.467375	585958	10.2802	0.194268	0.0476289	16.946	36.108	-	-	-	-
Atlantic Meridional Transect Project (AMT 2)i	35.6666	-20.4205	North Atlantic Ocean	49.7	epipelagic	467676	9.35351	90306.6	0.437695	557982	9.79121	0.193097	0.0467947	15.722	36.095	-	-	-	-
Atlantic Meridional Transect Project (AMT 2)i	35.6666	-20.4205	North Atlantic Ocean	59.7	epipelagic	459324	9.18649	69167.5	0.489857	528492	9.67634	0.150585	0.0533236	15.357	36.087	-	-	-	-
Atlantic Meridional Transect Project (AMT 2)i	35.6666	-20.4205	North Atlantic Ocean	69.7	epipelagic	423831	8.47662	85692.3	10.2475	509523	18.7241	0.202185	1.20891	15.227	36.079	-	-	-	-
Atlantic Meridional Transect Project (AMT 2)i	35.6666	-20.4205	North Atlantic Ocean	79.9	epipelagic	455149	9.10297	99312.3	0.407564	554461	9.51054	0.218197	0.0447726	15.097	36.074	-	-	-	-
Atlantic Meridional Transect Project (AMT 2)i	35.6666	-20.4205	North Atlantic Ocean	99.7	epipelagic	386250	7.725	63641.5	0.204924	449892	7.92992	0.164768	0.0265273	14.738	36.038	-	-	-	-
Atlantic Meridional Transect Project (AMT 2)i	39.8985	-19.9973	North Atlantic Ocean	6.2	surface	709865	14.1973	94141.4	1.68046	804006	15.8778	0.132619	0.118365	15.125	35.87	-	-	-	-
Atlantic Meridional Transect Project (AMT 2)i	39.8985	-19.9973	North Atlantic Ocean	17.7	epipelagic	674372	13.4874	146425	1.94951	820797	15.4369	0.217129	0.144543	15.122	35.872	-	-	-	-
Atlantic Meridional Transect Project (AMT 2)i	39.8985	-19.9973	North Atlantic Ocean	28.6	epipelagic	872716	17.4543	247837	41.3204	1.12055e+06	58.7747	0.283983	2.36734	15.121	35.875	-	-	-	-
Atlantic Meridional Transect Project (AMT 2)i	39.8985	-19.9973	North Atlantic Ocean	39.1	epipelagic	789203	15.7841	163842	1.9278	953045	17.7119	0.207604	0.122136	15.117	35.873	-	-	-	-
Atlantic Meridional Transect Project (AMT 2)i	39.8985	-19.9973	North Atlantic Ocean	48	epipelagic	1.01469e+06	20.2938	199977	1.85434	1.21467e+06	22.1481	0.197082	0.0913748	14.543	35.946	-	-	-	-
Atlantic Meridional Transect Project (AMT 2)i	39.8985	-19.9973	North Atlantic Ocean	58	epipelagic	714041	14.2808	144985	19.0689	859025	33.3497	0.203048	1.33528	14.465	36.006	-	-	-	-
Atlantic Meridional Transect Project (AMT 2)i	39.8985	-19.9973	North Atlantic Ocean	68.1	epipelagic	438446	8.76892	137454	7.94827	575900	16.7172	0.313502	0.906414	14.35	35.992	-	-	-	-
Atlantic Meridional Transect Project (AMT 2)i	39.8985	-19.9973	North Atlantic Ocean	78.8	epipelagic	338230	6.76459	85081	0.238067	423311	7.00266	0.251548	0.0351931	14.227	35.975	-	-	-	-
Atlantic Meridional Transect Project (AMT 2)i	39.8985	-19.9973	North Atlantic Ocean	89	epipelagic	309000	6.18	147567	0.382198	456567	6.5622	0.477562	0.0618443	14.056	35.938	-	-	-	-
Atlantic Meridional Transect Project (AMT 2)i	-0.1947	-26.4005	North Atlantic Ocean	6.9	surface	653493	13.0699	89692.7	0.342557	743186	13.4124	0.137251	0.0262097	28.471	35.929	-	-	-	-
Atlantic Meridional Transect Project (AMT 2)i	-0.1947	-26.4005	South Atlantic Ocean	19.1	epipelagic	620088	12.4018	55826.3	0.268207	675914	12.67	0.0900297	0.0216265	28.448	35.942	-	-	-	-
Atlantic Meridional Transect Project (AMT 2)i	-0.1947	-26.4005	South Atlantic Ocean	39.1	epipelagic	830960	16.6192	172443	0.72727	1.0034e+06	17.3465	0.207522	0.0437609	26.767	36.213	-	-	-	-
Atlantic Meridional Transect Project (AMT 2)i	-0.1947	-26.4005	South Atlantic Ocean	48.8	epipelagic	830960	16.6192	105867	16.6246	936827	33.2438	0.127404	1.00033	25.823	36.375	-	-	-	-
Atlantic Meridional Transect Project (AMT 2)i	-0.1947	-26.4005	South Atlantic Ocean	59	epipelagic	709865	14.1973	134620	11.1906	844485	25.3879	0.189642	0.788219	24.733	36.589	-	-	-	-
Atlantic Meridional Transect Project (AMT 2)i	-0.1947	-26.4005	South Atlantic Ocean	68.8	epipelagic	741182	14.8237	103227	0.310791	844409	15.1344	0.139273	0.0209659	22.349	36.514	-	-	-	-
Atlantic Meridional Transect Project (AMT 2)i	-0.1947	-26.4005	South Atlantic Ocean	78	epipelagic	551189	11.0238	73574	0.205591	624763	11.2294	0.133482	0.0186498	20.383	36.289	-	-	-	-
Atlantic Meridional Transect Project (AMT 2)i	-0.1947	-26.4005	South Atlantic Ocean	99	epipelagic	279770	5.59541	57563.1	6.9047	337333	12.5001	0.205751	1.23399	16.295	35.724	-	-	-	-
Atlantic Meridional Transect Project (AMT 2)i	3.4022	-24.7979	North Atlantic Ocean	6.3	surface	787115	15.7423	138722	0.693389	925837	16.4357	0.176241	0.0440463	28.7	35.372	-	-	-	-
Atlantic Meridional Transect Project (AMT 2)i	3.4022	-24.7979	North Atlantic Ocean	20	epipelagic	878980	17.5796	121708	0.512342	1.00069e+06	18.0919	0.138465	0.0291441	28.586	35.49	-	-	-	-
Atlantic Meridional Transect Project (AMT 2)i	3.4022	-24.7979	North Atlantic Ocean	39.4	epipelagic	845574	16.9115	165107	0.731658	1.01068e+06	17.6431	0.19526	0.0432639	27.96	35.756	-	-	-	-
Atlantic Meridional Transect Project (AMT 2)i	3.4022	-24.7979	North Atlantic Ocean	49.9	epipelagic	849750	16.995	196207	20.65	1.04596e+06	37.645	0.230899	1.21506	22.667	36.002	-	-	-	-
Atlantic Meridional Transect Project (AMT 2)i	3.4022	-24.7979	North Atlantic Ocean	59.6	epipelagic	588770	11.7754	94980.7	11.7387	683751	23.5141	0.16132	0.996883	18.46	35.782	-	-	-	-
Atlantic Meridional Transect Project (AMT 2)i	3.4022	-24.7979	North Atlantic Ocean	69.2	epipelagic	484378	9.68757	78614.2	0.203611	562993	9.89118	0.162299	0.0210177	17.593	35.692	-	-	-	-
Atlantic Meridional Transect Project (AMT 2)i	3.4022	-24.7979	North Atlantic Ocean	79.4	epipelagic	417568	8.35135	93307.7	0.274409	510875	8.62576	0.223455	0.032858	16.085	35.64	-	-	-	-
Atlantic Meridional Transect Project (AMT 2)i	3.4022	-24.7979	North Atlantic Ocean	89.9	epipelagic	371635	7.4327	70836.2	0.183466	442471	7.61617	0.190607	0.0246836	15.897	35.614	-	-	-	-
Atlantic Meridional Transect Project (AMT 2)i	3.4022	-24.7979	North Atlantic Ocean	99.8	epipelagic	334054	6.68108	62817.3	0.181741	396871	6.86282	0.188045	0.0272023	15.561	35.587	-	-	-	-
Atlantic Meridional Transect Project (AMT 2)i	7.5771	-22.9442	North Atlantic Ocean	7.5	surface	726568	14.5314	146950	0.5844	873517	15.1158	0.202252	0.0402165	26.759	35.939	-	-	-	-
Atlantic Meridional Transect Project (AMT 2)i	7.5771	-22.9442	North Atlantic Ocean	19.9	epipelagic	697338	13.9468	106276	9.74204	803614	23.6888	0.152403	0.698516	26.724	35.946	-	-	-	-
Atlantic Meridional Transect Project (AMT 2)i	7.5771	-22.9442	North Atlantic Ocean	30	epipelagic	666020	13.3204	103059	0.464041	769079	13.7844	0.154738	0.0348368	26.416	35.956	-	-	-	-
Atlantic Meridional Transect Project (AMT 2)i	7.5771	-22.9442	North Atlantic Ocean	39.3	epipelagic	820520	16.4104	109767	0.919086	930287	17.3295	0.133777	0.0560063	21.543	35.933	-	-	-	-
Atlantic Meridional Transect Project (AMT 2)i	7.5771	-22.9442	North Atlantic Ocean	48.6	epipelagic	785027	15.7005	89436.9	0.732792	874464	16.4333	0.113928	0.046673	20.27	35.933	-	-	-	-
Atlantic Meridional Transect Project (AMT 2)i	7.5771	-22.9442	North Atlantic Ocean	59.3	epipelagic	519872	10.3974	105918	11.9724	625789	22.3699	0.203738	1.15148	17.158	35.731	-	-	-	-
Atlantic Meridional Transect Project (AMT 2)i	7.5771	-22.9442	North Atlantic Ocean	69.3	epipelagic	490642	9.81284	90789	0.250178	581431	10.063	0.185041	0.025495	16.385	35.653	-	-	-	-
Atlantic Meridional Transect Project (AMT 2)i	7.5771	-22.9442	North Atlantic Ocean	79.6	epipelagic	344493	6.88987	55869.9	3.52125	400363	10.4111	0.16218	0.511077	15.313	35.535	-	-	-	-
Atlantic Meridional Transect Project (AMT 2)i	7.5771	-22.9442	North Atlantic Ocean	99.4	epipelagic	263068	5.26135	69796.6	0.182878	332864	5.44423	0.265318	0.0347588	14.846	35.49	-	-	-	-
Atlantic Meridional Transect Project (AMT 2)i	11.7392	-21.0554	North Atlantic Ocean	6.7	surface	878980	17.5796	164022	0.859147	1.043e+06	18.4387	0.186605	0.0488718	26.124	36.034	-	-	-	-
Atlantic Meridional Transect Project (AMT 2)i	11.7392	-21.0554	North Atlantic Ocean	19.3	epipelagic	970845	19.4169	162602	13.4207	1.13345e+06	32.8376	0.167485	0.691188	26.095	36.037	-	-	-	-
Atlantic Meridional Transect Project (AMT 2)i	11.7392	-21.0554	North Atlantic Ocean	29.2	epipelagic	1636865	32.7373	289325	2.65372	1.92619e+06	35.391	0.176756	0.0810611	19.707	35.789	-	-	-	-
Atlantic Meridional Transect Project (AMT 2)i	11.7392	-21.0554	North Atlantic Ocean	40.6	epipelagic	1.49072e+06	29.8143	237509	3.95615	1.72823e+06	33.7705	0.159325	0.132693	17.409	35.697	-	-	-	-
Atlantic Meridional Transect Project (AMT 2)i	11.7392	-21.0554	North Atlantic Ocean	49.6	epipelagic	615912	12.3182	121273	18.1034	737185	30.4217	0.1969	1.46964	15.684	35.591	-	-	-	-
Atlantic Meridional Transect Project (AMT 2)i	11.7392	-21.0554	North Atlantic Ocean	60.3	epipelagic	354932	7.09865	67152.8	0.18729	422085	7.28594	0.189199	0.0263839	15.144	35.52	-	-	-	-
Atlantic Meridional Transect Project (AMT 2)i	11.7392	-21.0554	North Atlantic Ocean	69.5	epipelagic	290209	5.80419	46154.9	7.7118	336364	13.516	0.15904	1.32866	14.792	35.489	-	-	-	-
Atlantic Meridional Transect Project (AMT 2)i	11.7392	-21.0554	North Atlantic Ocean	79.2	epipelagic	304824	6.09649	83909.4	0.22668	388734	6.32317	0.275271	0.0371821	14.44	35.454	-	-	-	-
Atlantic Meridional Transect Project (AMT 2)i	11.7392	-21.0554	North Atlantic Ocean	99.7	epipelagic	279770	5.59541	49407.3	0.127965	329178	5.72337	0.176599	0.0228696	13.916	35.397	-	-	-	-
Atlantic Meridional Transect Project (AMT 2)i	21.7631	-21.4692	North Atlantic Ocean	7.1	surface	1.44478e+06	28.8957	390433	1.16491	1.83522e+06	30.0606	0.270236	0.0403142	21.829	36.778	-	-	-	-
Atlantic Meridional Transect Project (AMT 2)i	21.7631	-21.4692	North Atlantic Ocean	19.6	epipelagic	1.27776e+06	25.5551	182669	17.3222	1.46043e+06	42.8773	0.142961	0.677835	21.814	36.775	-	-	-	-
Atlantic Meridional Transect Project (AMT 2)i	21.7631	-21.4692	North Atlantic Ocean	28.9	epipelagic	1.36962e+06	27.3924	202907	0.669192	1.57253e+06	28.0616	0.148148	0.0244298	21.813	36.765	-	-	-	-
Atlantic Meridional Transect Project (AMT 2)i	21.7631	-21.4692	North Atlantic Ocean	39.3	epipelagic	816345	16.3269	141948	13.9201	958292	30.247	0.173882	0.852589	20.98	36.838	-	-	-	-
Atlantic Meridional Transect Project (AMT 2)i	21.7631	-21.4692	North Atlantic Ocean	49.3	epipelagic	734919	14.6984	93412.1	0.462443	828331	15.1608	0.127105	0.0314622	20.695	36.826	-	-	-	-
Atlantic Meridional Transect Project (AMT 2)i	21.7631	-21.4692	North Atlantic Ocean	58.7	epipelagic	590858	11.8172	122889	17.3238	713747	29.141	0.207984	1.46599	20.504	36.8	-	-	-	-
Atlantic Meridional Transect Project (AMT 2)i	21.7631	-21.4692	North Atlantic Ocean	70	epipelagic	640966	12.8193	136044	0.67309	777010	13.4924	0.212248	0.0525059	20.35	36.804	-	-	-	-
Atlantic Meridional Transect Project (AMT 2)i	21.7631	-21.4692	North Atlantic Ocean	79.3	epipelagic	680635	13.6127	141524	18.2427	822160	31.8554	0.20793	1.34012	20.185	36.837	-	-	-	-
Atlantic Meridional Transect Project (AMT 2)i	21.7631	-21.4692	North Atlantic Ocean	98.9	epipelagic	394601	7.89203	48683.1	0.22966	443285	8.12169	0.123373	0.0291003	19.847	36.819	-	-	-	-
Atlantic Meridional Transect Project (AMT 2)i	26.5398	-21.7944	North Atlantic Ocean	7.6	surface	584595	11.6919	66753	0.430147	651348	12.122	0.114187	0.0367902	21.35	37.133	-	-	-	-
Atlantic Meridional Transect Project (AMT 2)i	26.5398	-21.7944	North Atlantic Ocean	30.4	epipelagic	542838	10.8568	107113	0.551383	649950	11.4081	0.19732	0.0507871	21.326	37.14	-	-	-	-
Atlantic Meridional Transect Project (AMT 2)i	26.5398	-21.7944	North Atlantic Ocean	50.4	epipelagic	576243	11.5249	114278	0.60001	690521	12.1249	0.198315	0.0520622	20.623	37.026	-	-	-	-
Atlantic Meridional Transect Project (AMT 2)i	26.5398	-21.7944	North Atlantic Ocean	70.6	epipelagic	528223	10.5645	55926.3	0.271807	584149	10.8363	0.105876	0.0257284	19.876	36.937	-	-	-	-
Atlantic Meridional Transect Project (AMT 2)i	26.5398	-21.7944	North Atlantic Ocean	79.5	epipelagic	511520	10.2304	88214.9	11.3829	599735	21.6133	0.172456	1.11265	19.694	36.922	-	-	-	-
Atlantic Meridional Transect Project (AMT 2)i	26.5398	-21.7944	North Atlantic Ocean	90	epipelagic	434270	8.68541	74458.6	0.246304	508729	8.93171	0.171457	0.0283583	19.538	36.914	-	-	-	-
Atlantic Meridional Transect Project (AMT 2)i	26.5398	-21.7944	North Atlantic Ocean	100.1	epipelagic	446797	8.93595	63806.8	7.65949	510604	16.5954	0.142809	0.857155	19.378	36.889	-	-	-	-
Atlantic Meridional Transect Project (AMT 2)i	-19.9067	-35.5242	South Atlantic Ocean	6	surface	526135	10.5227	88589	0.326335	614724	10.849	0.168377	0.0310124	25.178	36.808	-	-	-	-
Atlantic Meridional Transect Project (AMT 2)i	-19.9067	-35.5242	South Atlantic Ocean	29.6	epipelagic	618000	12.36	69169.8	0.27938	687170	12.6394	0.111925	0.0226035	25.192	36.813	-	-	-	-
Atlantic Meridional Transect Project (AMT 2)i	-19.9067	-35.5242	South Atlantic Ocean	40	epipelagic	634703	12.6941	98542	8.75802	733245	21.4521	0.155257	0.68993	25.193	36.813	-	-	-	-
Atlantic Meridional Transect Project (AMT 2)i	-19.9067	-35.5242	South Atlantic Ocean	49.7	epipelagic	613824	12.2765	116335	0.421583	730159	12.6981	0.189524	0.0343407	25.188	36.811	-	-	-	-
Atlantic Meridional Transect Project (AMT 2)i	-19.9067	-35.5242	South Atlantic Ocean	59.3	epipelagic	634703	12.6941	185394	3.85672	820097	16.5508	0.292096	0.303821	25.194	36.816	-	-	-	-
Atlantic Meridional Transect Project (AMT 2)i	-19.9067	-35.5242	South Atlantic Ocean	68.5	epipelagic	686899	13.738	96935.9	7.77319	783835	21.5112	0.141121	0.565818	25.054	36.785	-	-	-	-
Atlantic Meridional Transect Project (AMT 2)i	-19.9067	-35.5242	South Atlantic Ocean	79.6	epipelagic	691074	13.8215	129312	0.555423	820386	14.3769	0.187117	0.0401855	23.58	36.892	-	-	-	-
Atlantic Meridional Transect Project (AMT 2)i	-19.9067	-35.5242	South Atlantic Ocean	89.2	epipelagic	461412	9.22824	118153	7.58228	579565	16.8105	0.256068	0.821638	22.73	36.701	-	-	-	-
Atlantic Meridional Transect Project (AMT 2)i	-19.9067	-35.5242	South Atlantic Ocean	100	epipelagic	365372	7.30743	62070.4	0.200854	427442	7.50829	0.169883	0.0274863	22.35	36.668	-	-	-	-
Atlantic Meridional Transect Project (AMT 2)i	-15.1715	-33.3067	South Atlantic Ocean	7	surface	471851	9.43703	114022	0.295518	585874	9.73255	0.241649	0.0313147	28.139	37.269	-	-	-	-
Atlantic Meridional Transect Project (AMT 2)i	-15.1715	-33.3067	South Atlantic Ocean	19.5	epipelagic	578331	11.5666	48359.5	5.80186	626691	17.3685	0.083619	0.501604	28.124	37.268	-	-	-	-
Atlantic Meridional Transect Project (AMT 2)i	-15.1715	-33.3067	South Atlantic Ocean	38.6	epipelagic	528223	10.5645	85054.8	5.40028	613278	15.9647	0.161021	0.511174	28.112	37.267	-	-	-	-
Atlantic Meridional Transect Project (AMT 2)i	-15.1715	-33.3067	South Atlantic Ocean	59.5	epipelagic	549101	10.982	107576	0.300004	656677	11.282	0.195913	0.0273177	28.117	37.3	-	-	-	-
Atlantic Meridional Transect Project (AMT 2)i	-15.1715	-33.3067	South Atlantic Ocean	79.5	epipelagic	459324	9.18649	71865.3	16.1833	531190	25.3698	0.156459	1.76164	25.714	37.121	-	-	-	-
Atlantic Meridional Transect Project (AMT 2)i	-15.1715	-33.3067	South Atlantic Ocean	100.2	epipelagic	438446	8.76892	62864.3	0.209592	501310	8.97851	0.14338	0.0239017	24.479	37.07	-	-	-	-
Atlantic Meridional Transect Project (AMT 2)i	-11.2431	-31.4642	South Atlantic Ocean	6.5	surface	526135	10.5227	46083.5	0.1237	572219	10.6464	0.0875887	0.0117555	28.486	36.68	-	-	-	-
Atlantic Meridional Transect Project (AMT 2)i	-11.2431	-31.4642	South Atlantic Ocean	28.8	epipelagic	436358	8.72716	58800.1	0.158974	495158	8.88614	0.134752	0.018216	28.444	36.683	-	-	-	-
Atlantic Meridional Transect Project (AMT 2)i	-11.2431	-31.4642	South Atlantic Ocean	49.1	epipelagic	490642	9.81284	108980	9.39278	599622	19.2056	0.222117	0.957192	28.429	36.686	-	-	-	-
Atlantic Meridional Transect Project (AMT 2)i	-11.2431	-31.4642	South Atlantic Ocean	59.5	epipelagic	549101	10.982	122607	7.53802	671708	18.52	0.223286	0.686396	28.265	36.69	-	-	-	-
Atlantic Meridional Transect Project (AMT 2)i	-11.2431	-31.4642	South Atlantic Ocean	68.6	epipelagic	521960	10.4392	87214.6	0.254284	609174	10.6935	0.167091	0.0243586	27.843	37.144	-	-	-	-
Atlantic Meridional Transect Project (AMT 2)i	-11.2431	-31.4642	South Atlantic Ocean	80.2	epipelagic	549101	10.982	68865.9	5.85497	617967	16.837	0.125416	0.533141	25.428	37.057	-	-	-	-
Atlantic Meridional Transect Project (AMT 2)i	-11.2431	-31.4642	South Atlantic Ocean	89.2	epipelagic	488554	9.77108	119030	7.80252	607584	17.5736	0.243638	0.798532	24.917	37.03	-	-	-	-
Atlantic Meridional Transect Project (AMT 2)i	-7.4796	-29.757	South Atlantic Ocean	29.4	epipelagic	561628	11.2326	112992	0.312027	674620	11.5446	0.201186	0.0277788	28.527	36.39	-	-	-	-
Atlantic Meridional Transect Project (AMT 2)i	-7.4796	-29.757	South Atlantic Ocean	49	epipelagic	628439	12.5688	78163.3	10.3904	706603	22.9592	0.124377	0.826682	28.505	36.39	-	-	-	-
Atlantic Meridional Transect Project (AMT 2)i	-7.4796	-29.757	South Atlantic Ocean	59	epipelagic	741182	14.8237	118373	0.353359	859555	15.177	0.159708	0.0238375	28.4	36.404	-	-	-	-
Atlantic Meridional Transect Project (AMT 2)i	-7.4796	-29.757	South Atlantic Ocean	68.4	epipelagic	709865	14.1973	66054.3	7.66531	775919	21.8626	0.0930519	0.539913	26.732	36.571	-	-	-	-
Atlantic Meridional Transect Project (AMT 2)i	-7.4796	-29.757	South Atlantic Ocean	89.1	epipelagic	519872	10.3974	82711.3	0.237275	602583	10.6347	0.159099	0.0228206	24.219	36.566	-	-	-	-
Atlantic Meridional Transect Project (AMT 2)i	-7.4796	-29.757	South Atlantic Ocean	98.9	epipelagic	488554	9.77108	66749.8	0.19226	555304	9.96334	0.136627	0.0196764	22.992	36.467	-	-	-	-
Atlantic Meridional Transect Project (AMT 2)i	-3.9166	-28.2098	South Atlantic Ocean	7.5	surface	622176	12.4435	106967	0.373933	729142	12.8174	0.171923	0.0300504	28.373	35.711	-	-	-	-
Atlantic Meridional Transect Project (AMT 2)i	-3.9166	-28.2098	South Atlantic Ocean	20.4	epipelagic	701514	14.0303	76424	0.308191	777938	14.3385	0.108942	0.0219662	28.358	35.715	-	-	-	-
Atlantic Meridional Transect Project (AMT 2)i	-3.9166	-28.2098	South Atlantic Ocean	29.9	epipelagic	772500	15.45	100632	0.36755	873132	15.8176	0.130269	0.0237896	27.957	36.034	-	-	-	-
Atlantic Meridional Transect Project (AMT 2)i	-3.9166	-28.2098	South Atlantic Ocean	39.7	epipelagic	776676	15.5335	96404	10.7492	873080	26.2827	0.124124	0.691997	25.861	36.185	-	-	-	-
Atlantic Meridional Transect Project (AMT 2)i	-3.9166	-28.2098	South Atlantic Ocean	49.4	epipelagic	776676	15.5335	176738	10.3438	953413	25.8773	0.227557	0.665901	23.57	36.247	-	-	-	-
Atlantic Meridional Transect Project (AMT 2)i	-3.9166	-28.2098	South Atlantic Ocean	59.8	epipelagic	680635	13.6127	75614.8	0.21355	756250	13.8263	0.111094	0.0156875	21.943	36.389	-	-	-	-
Atlantic Meridional Transect Project (AMT 2)i	-3.9166	-28.2098	South Atlantic Ocean	70.1	epipelagic	407128	8.14257	81291.4	11.7175	488420	19.86	0.19967	1.43904	19.718	36.179	-	-	-	-
Atlantic Meridional Transect Project (AMT 2)i	-3.9166	-28.2098	South Atlantic Ocean	80	epipelagic	369547	7.39095	34191.2	0.0894239	403739	7.48037	0.0925219	0.0120991	16.11	35.673	-	-	-	-
Atlantic Meridional Transect Project (AMT 2)i	-3.9166	-28.2098	South Atlantic Ocean	99.6	epipelagic	188323	3.76646	33166.5	0.0867698	221489	3.85323	0.176115	0.0230375	13.903	35.356	-	-	-	-
Atlantic Meridional Transect Project (AMT 2)i	-36.0588	-49.8114	South Atlantic Ocean	80.3	epipelagic	267243	5.34487	39498.9	0.386287	306742	5.73115	0.147801	0.0722726	20.666	36.05	-	-	-	-
Atlantic Meridional Transect Project (AMT 2)i	-36.0588	-49.8114	South Atlantic Ocean	50	epipelagic	242189	4.84378	46212.4	0.4872	288402	5.33098	0.190811	0.100583	20.68	36.052	-	-	-	-
Atlantic Meridional Transect Project (AMT 2)i	-36.0588	-49.8114	South Atlantic Ocean	30.3	epipelagic	170368	3.40735	27549.3	0.372043	197917	3.77939	0.161705	0.109188	20.693	36.052	-	-	-	-
Atlantic Meridional Transect Project (AMT 2)i	-33.3865	-46.6222	South Atlantic Ocean	9	surface	250541	5.01081	47409.3	0.8244	297950	5.83521	0.189228	0.164524	20.767	36.054	-	-	-	-
Atlantic Meridional Transect Project (AMT 2)i	-36.0588	-49.8114	South Atlantic Ocean	7.9	surface	153247	3.06495	35510.7	0.459483	188758	3.52443	0.231722	0.149915	20.77	36.054	-	-	-	-
Atlantic Meridional Transect Project (AMT 2)i	-33.3865	-46.6222	South Atlantic Ocean	21.7	epipelagic	213795	4.27589	47249.6	0.723756	261044	4.99965	0.221005	0.169264	20.421	35.84	-	-	-	-
Atlantic Meridional Transect Project (AMT 2)i	-33.3865	-46.6222	South Atlantic Ocean	31.8	epipelagic	218805	4.37611	40826.3	20.2247	259632	24.6008	0.186587	4.62162	20.331	35.843	-	-	-	-
Atlantic Meridional Transect Project (AMT 2)i	-33.3865	-46.6222	South Atlantic Ocean	40.6	epipelagic	229662	4.59324	52231	0.770068	281893	5.36331	0.227425	0.167652	20.255	35.834	-	-	-	-
Atlantic Meridional Transect Project (AMT 2)i	-33.3865	-46.6222	South Atlantic Ocean	51.3	epipelagic	215465	4.3093	80677.1	23.1077	296142	27.417	0.374433	5.36228	20.235	35.834	-	-	-	-
Atlantic Meridional Transect Project (AMT 2)i	-33.3865	-46.6222	South Atlantic Ocean	61.1	epipelagic	250541	5.01081	57305.5	0.616161	307846	5.62697	0.228727	0.122966	20.219	35.832	-	-	-	-
Atlantic Meridional Transect Project (AMT 2)i	-33.3865	-46.6222	South Atlantic Ocean	71.3	epipelagic	224651	4.49303	24320.2	4.57688	248972	9.0699	0.108258	1.01866	19.676	35.841	-	-	-	-
Atlantic Meridional Transect Project (AMT 2)i	-33.3865	-46.6222	South Atlantic Ocean	78.3	epipelagic	214630	4.2926	19800.4	3.42783	234430	7.72042	0.092254	0.798545	19.469	35.87	-	-	-	-
Atlantic Meridional Transect Project (AMT 2)i	-33.3865	-46.6222	South Atlantic Ocean	89.2	epipelagic	151995	3.03989	27631.8	0.0759096	179626	3.1158	0.181794	0.0249711	18.686	35.929	-	-	-	-
Atlantic Meridional Transect Project (AMT 2)i	-30.3031	-43.4223	South Atlantic Ocean	5.5	surface	161181	3.22362	24272.5	0.106299	185454	3.32992	0.150592	0.032975	23.286	36.363	-	-	-	-
Atlantic Meridional Transect Project (AMT 2)i	-30.3031	-43.4223	South Atlantic Ocean	21.1	epipelagic	288122	5.76243	72148.1	0.217935	360270	5.98037	0.250408	0.0378199	23.293	36.361	-	-	-	-
Atlantic Meridional Transect Project (AMT 2)i	-30.3031	-43.4223	South Atlantic Ocean	40.4	epipelagic	260562	5.21124	19311.4	0.0810878	279874	5.29233	0.0741144	0.0155602	23.276	36.357	-	-	-	-
Atlantic Meridional Transect Project (AMT 2)i	-30.3031	-43.4223	South Atlantic Ocean	60.6	epipelagic	203773	4.07546	32227.5	0.11454	236000	4.19	0.158154	0.0281049	23.277	36.36	-	-	-	-
Atlantic Meridional Transect Project (AMT 2)i	-30.3031	-43.4223	South Atlantic Ocean	80.8	epipelagic	225486	4.50973	28101.1	0.119556	253588	4.62929	0.124624	0.0265107	19.392	35.914	-	-	-	-
Atlantic Meridional Transect Project (AMT 2)i	-30.3031	-43.4223	South Atlantic Ocean	90.8	epipelagic	180389	3.60778	38500.8	3.47626	218890	7.08405	0.213432	0.963545	18.872	35.879	-	-	-	-
Atlantic Meridional Transect Project (AMT 2)i	-30.3031	-43.4223	South Atlantic Ocean	100.6	epipelagic	115249	2.30497	27951.8	0.0874296	143200	2.3924	0.242534	0.0379308	18.529	35.857	-	-	-	-
Atlantic Meridional Transect Project (AMT 2)i	-27.6185	-40.7125	South Atlantic Ocean	9.4	surface	329878	6.59757	33809.8	0.171092	363688	6.76866	0.102492	0.0259327	24.549	36.661	-	-	-	-
Atlantic Meridional Transect Project (AMT 2)i	-27.6185	-40.7125	South Atlantic Ocean	31.8	epipelagic	343241	6.86481	80984.6	0.289934	424225	7.15475	0.235941	0.0422348	24.561	36.661	-	-	-	-
Atlantic Meridional Transect Project (AMT 2)i	-27.6185	-40.7125	South Atlantic Ocean	51.8	epipelagic	336560	6.73119	30089.6	0.17148	366649	6.90267	0.0894035	0.0254754	24.555	36.661	-	-	-	-
Atlantic Meridional Transect Project (AMT 2)i	-27.6185	-40.7125	South Atlantic Ocean	60.1	epipelagic	340735	6.8147	37984	4.61226	378719	11.427	0.111477	0.676811	24.544	36.661	-	-	-	-
Atlantic Meridional Transect Project (AMT 2)i	-27.6185	-40.7125	South Atlantic Ocean	71.3	epipelagic	435105	8.70211	93529.4	0.349153	528635	9.05126	0.214958	0.0401228	22.547	36.437	-	-	-	-
Atlantic Meridional Transect Project (AMT 2)i	-27.6185	-40.7125	South Atlantic Ocean	82.2	epipelagic	305659	6.11319	66839	7.39358	372498	13.5068	0.218671	1.20945	22.165	36.499	-	-	-	-
Atlantic Meridional Transect Project (AMT 2)i	-27.6185	-40.7125	South Atlantic Ocean	91.4	epipelagic	253046	5.06092	34365.6	0.0976935	287412	5.15861	0.135808	0.0193035	22.317	36.676	-	-	-	-
Atlantic Meridional Transect Project (AMT 2)i	-27.6185	-40.7125	South Atlantic Ocean	101.6	epipelagic	223816	4.47632	38128.7	0.0987533	261945	4.57508	0.170357	0.0220613	21.143	36.367	-	-	-	-
Atlantic Meridional Transect Project (AMT 2)i	-24.3534	-37.8651	South Atlantic Ocean	7.1	surface	268914	5.37827	54662.8	0.174987	323576	5.55326	0.203273	0.0325359	25.183	36.809	-	-	-	-
Atlantic Meridional Transect Project (AMT 2)i	-24.3534	-37.8651	South Atlantic Ocean	30.1	epipelagic	264738	5.29476	36660.7	0.128361	301399	5.42312	0.138479	0.0242431	25.194	36.813	-	-	-	-
Atlantic Meridional Transect Project (AMT 2)i	-24.3534	-37.8651	South Atlantic Ocean	48.4	epipelagic	269749	5.39497	52938.3	0.17052	322687	5.56549	0.19625	0.0316072	25.187	36.811	-	-	-	-
Atlantic Meridional Transect Project (AMT 2)i	-24.3534	-37.8651	South Atlantic Ocean	69.2	epipelagic	278935	5.5787	46693.9	0.174393	325629	5.7531	0.1674	0.0312605	24.689	36.813	-	-	-	-
Atlantic Meridional Transect Project (AMT 2)i	-24.3534	-37.8651	South Atlantic Ocean	79.7	epipelagic	274759	5.49519	47958.7	9.17734	322718	14.6725	0.174548	1.67007	23.58	36.892	-	-	-	-
Atlantic Meridional Transect Project (AMT 2)i	-24.3534	-37.8651	South Atlantic Ocean	90.1	epipelagic	303989	6.07978	65980.5	0.197283	369970	6.27707	0.217049	0.0324491	22.662	36.675	-	-	-	-
Atlantic Meridional Transect Project (AMT 2)i	-24.3534	-37.8651	South Atlantic Ocean	99.6	epipelagic	225486	4.50973	45059.5	0.116704	270546	4.62643	0.199832	0.0258783	22.35	36.668	-	-	-	-
Atlantic Meridional Transect Project (AMT 2)i	48.7501	-8.097	South Atlantic Ocean	7.5	surface	922824	18.4565	128339	0.335337	1.05116e+06	18.7918	0.139072	0.0181691	11.597	35.518	-	-	-	-
Atlantic Meridional Transect Project (AMT 2)i	48.7501	-8.097	South Atlantic Ocean	19.9	epipelagic	910297	18.2059	114473	3.67303	1.02477e+06	21.879	0.125753	0.201749	11.593	35.519	-	-	-	-
Atlantic Meridional Transect Project (AMT 2)i	48.7501	-8.097	South Atlantic Ocean	30	epipelagic	914473	18.2895	103176	0.268695	1.01765e+06	18.5582	0.112825	0.0146912	11.589	35.52	-	-	-	-
Atlantic Meridional Transect Project (AMT 2)i	48.7501	-8.097	South Atlantic Ocean	39.7	epipelagic	847662	16.9532	118223	0.307367	965885	17.2606	0.139469	0.0181303	11.566	35.519	-	-	-	-
Atlantic Meridional Transect Project (AMT 2)i	48.7501	-8.097	South Atlantic Ocean	49.3	epipelagic	601297	12.0259	72247.8	0.189026	673545	12.215	0.120153	0.0157182	11.134	35.504	-	-	-	-
Atlantic Meridional Transect Project (AMT 2)i	48.7501	-8.097	South Atlantic Ocean	58.9	epipelagic	490642	9.81284	109708	0.284144	600350	10.097	0.223601	0.0289564	11.119	35.505	-	-	-	-
Atlantic Meridional Transect Project (AMT 2)i	48.7501	-8.097	South Atlantic Ocean	69.7	epipelagic	450973	9.01946	49407.3	0.127965	500380	9.14742	0.109557	0.0141876	11.117	35.505	-	-	-	-
Atlantic Meridional Transect Project (AMT 2)i	48.7501	-8.097	South Atlantic Ocean	99.7	epipelagic	486466	9.72932	78810.1	0.205521	565276	9.93485	0.162005	0.0211239	11.116	35.506	-	-	-	-
Atlantic Meridional Transect Project (AMT 3)i	47.3652	-18.2055	North Atlantic Ocean	9.5	surface	344000	6.88	72480	8.27237	416480	15.1524	0.210698	1.20238	16.365	35.628	0.11	0.51	0	0.31
Atlantic Meridional Transect Project (AMT 3)i	47.3652	-18.2055	North Atlantic Ocean	22.1	epipelagic	248900	4.978	72140	8.28522	321040	13.2632	0.289835	1.66437	16.365	35.629	0.11	0.45	0	0.32
Atlantic Meridional Transect Project (AMT 3)i	47.3652	-18.2055	North Atlantic Ocean	32.3	epipelagic	254800	5.096	68410	7.95967	323210	13.0557	0.268485	1.56195	16.347	35.631	0.11	0.57	0	0.35
Atlantic Meridional Transect Project (AMT 3)i	47.3652	-18.2055	North Atlantic Ocean	41.5	epipelagic	224900	4.498	32470	4.23183	257370	8.72983	0.144375	0.940824	14.365	35.732	0.27	2.8	0	0.58
Atlantic Meridional Transect Project (AMT 3)i	47.3652	-18.2055	North Atlantic Ocean	51.8	epipelagic	210910	4.2182	12470	2.0037	223380	6.2219	0.0591247	0.475014	13.356	35.704	0.16	5.16	0	1.04
Atlantic Meridional Transect Project (AMT 3)i	47.3652	-18.2055	North Atlantic Ocean	60.9	epipelagic	156600	3.132	4190	0.746406	160790	3.87841	0.0267561	0.238316	13.54	35.792	0.04	5.51	0	1.28
Atlantic Meridional Transect Project (AMT 3)i	47.3652	-18.2055	North Atlantic Ocean	100	epipelagic	123670	2.4734	350	0.0601118	124020	2.53351	0.00283011	0.0243033	13.234	35.798	0.03	6.74	0	2.18
Atlantic Meridional Transect Project (AMT 3)i	42.903	-19.992	North Atlantic Ocean	86.1	epipelagic	365230	7.3046	2070	0.226557	367300	7.53116	0.00566766	0.0310157	13.148	35.722	0	9.54	0.6	1.72
Atlantic Meridional Transect Project (AMT 3)i	42.903	-19.992	North Atlantic Ocean	65.8	epipelagic	290790	5.8158	11160	1.09272	301950	6.90852	0.0383782	0.187888	13.771	35.7	0	6.67	0.44	1.41
Atlantic Meridional Transect Project (AMT 3)i	42.903	-19.992	North Atlantic Ocean	55.8	epipelagic	343350	6.867	42070	3.33841	385420	10.2054	0.122528	0.486152	15.071	35.69	0	0	0.3	1.23
Atlantic Meridional Transect Project (AMT 3)i	42.903	-19.992	North Atlantic Ocean	36.5	epipelagic	331930	6.6386	44270	2.26864	376200	8.90724	0.133371	0.341734	18.514	35.752	0	0	0.14	0.27
Atlantic Meridional Transect Project (AMT 3)i	42.903	-19.992	North Atlantic Ocean	26	epipelagic	269060	5.3812	43670	2.14667	312730	7.52787	0.162306	0.39892	18.857	35.747	0	0	0.14	0.22
Atlantic Meridional Transect Project (AMT 3)i	42.903	-19.992	North Atlantic Ocean	13.6	epipelagic	267350	5.347	32420	1.54542	299770	6.89242	0.121264	0.289026	19.138	35.758	0	0	0.14	0.22
Atlantic Meridional Transect Project (AMT 3)i	38.1693	-20.0142	North Atlantic Ocean	20.5	epipelagic	114420	2.2884	45460	2.23788	159880	4.52628	0.397308	0.977923	21.947	36.386	0	0	0	0
Atlantic Meridional Transect Project (AMT 3)i	38.1693	-20.0142	North Atlantic Ocean	31.9	epipelagic	171380	3.4276	81490	3.67545	252870	7.10305	0.475493	1.07231	21.999	36.43	0	0	0	0
Atlantic Meridional Transect Project (AMT 3)i	38.1693	-20.0142	North Atlantic Ocean	40.7	epipelagic	157010	3.1402	125870	5.15673	282880	8.29693	0.801669	1.64217	22.002	36.474	0	0	0.91	0
Atlantic Meridional Transect Project (AMT 3)i	38.1693	-20.0142	North Atlantic Ocean	51.3	epipelagic	204160	4.0832	117140	4.57657	321300	8.65977	0.573766	1.12083	19.324	36.254	0	1.31	0.49	0
Atlantic Meridional Transect Project (AMT 3)i	38.1693	-20.0142	North Atlantic Ocean	61.3	epipelagic	247820	4.9564	116530	4.59399	364350	9.55039	0.47022	0.92688	17.331	36.111	0.01	4.48	0.48	0
Atlantic Meridional Transect Project (AMT 3)i	38.1693	-20.0142	North Atlantic Ocean	79.9	epipelagic	282910	5.6582	52670	2.20193	335580	7.86013	0.186172	0.389158	14.954	35.931	0.12	4.48	0.64	0
Atlantic Meridional Transect Project (AMT 3)i	38.1693	-20.0142	North Atlantic Ocean	99.6	epipelagic	115380	2.3076	5830	0.213814	121210	2.52141	0.0505287	0.0926564	14.798	36.093	0.04	5.26	0.68	0
Atlantic Meridional Transect Project (AMT 3)i	29.497	-21.8086	North Atlantic Ocean	100.3	epipelagic	109130	2.1826	100130	3.76462	209260	5.94722	0.91753	1.72483	19.045	36.733	0.03	0.09	0.03	0
Atlantic Meridional Transect Project (AMT 3)i	29.497	-21.8086	North Atlantic Ocean	80.5	epipelagic	208260	4.1652	121230	4.72897	329490	8.89417	0.582109	1.13535	20.053	36.711	0	0.08	0.03	0
Atlantic Meridional Transect Project (AMT 3)i	29.497	-21.8086	North Atlantic Ocean	60.3	epipelagic	192300	3.846	88200	3.53079	280500	7.37679	0.458658	0.918043	21.948	36.948	0	0	0.03	0
Atlantic Meridional Transect Project (AMT 3)i	29.497	-21.8086	North Atlantic Ocean	40.3	epipelagic	137200	2.744	65160	2.68161	202360	5.42561	0.474927	0.977263	24.413	37.224	0	0	0.03	0
Atlantic Meridional Transect Project (AMT 3)i	29.497	-21.8086	North Atlantic Ocean	20.5	epipelagic	149610	2.9922	72790	2.91149	222400	5.90369	0.486532	0.973025	24.426	37.223	0	0	0.03	0
Atlantic Meridional Transect Project (AMT 3)i	29.497	-21.8086	North Atlantic Ocean	7.8	surface	123600	2.472	61900	2.5183	185500	4.99029	0.500809	1.01873	24.444	37.222	0	0	0.03	0
Atlantic Meridional Transect Project (AMT 3)i	24.6784	-21.4039	North Atlantic Ocean	7.4	surface	113000	2.26	146910	5.58084	259910	7.84084	1.30009	2.4694	24.761	37.06	0	0	0.02	0
Atlantic Meridional Transect Project (AMT 3)i	24.6784	-21.4039	North Atlantic Ocean	21.2	epipelagic	101470	2.0294	154150	5.86376	255620	7.89316	1.51917	2.8894	24.78	37.076	0	0	0.02	0
Atlantic Meridional Transect Project (AMT 3)i	24.6784	-21.4039	North Atlantic Ocean	40.6	epipelagic	159940	3.1988	133410	5.24221	293350	8.44101	0.834125	1.6388	24.231	37.312	0	0	0.02	0
Atlantic Meridional Transect Project (AMT 3)i	24.6784	-21.4039	North Atlantic Ocean	60.6	epipelagic	98570	1.9714	209850	8.07274	308420	10.0441	2.12894	4.09493	22.894	37.224	0	0	0.02	0
Atlantic Meridional Transect Project (AMT 3)i	24.6784	-21.4039	North Atlantic Ocean	81.4	epipelagic	121690	2.4338	165900	6.45858	287590	8.89238	1.3633	2.6537	20.596	36.986	0	0.13	0.02	0
Atlantic Meridional Transect Project (AMT 3)i	24.6784	-21.4039	North Atlantic Ocean	91	epipelagic	144560	2.8912	171950	6.70752	316510	9.59872	1.18947	2.31998	19.902	36.906	0	0	0	0
Atlantic Meridional Transect Project (AMT 3)i	24.6784	-21.4039	North Atlantic Ocean	101.4	epipelagic	227980	4.5596	87870	3.24768	315850	7.80728	0.385429	0.712273	19.584	36.89	0.1	0.94	0.02	0
Atlantic Meridional Transect Project (AMT 3)i	20.086	-20.6339	North Atlantic Ocean	8.5	surface	703000	14.06	121370	19.8046	824370	33.8646	0.172646	1.40858	24.754	36.304	0.03	0	0.05	0.35
Atlantic Meridional Transect Project (AMT 3)i	20.086	-20.6339	North Atlantic Ocean	21.6	epipelagic	694500	13.89	145160	26.1367	839660	40.0267	0.209014	1.8817	24.635	36.293	0.02	0	0.04	0.43
Atlantic Meridional Transect Project (AMT 3)i	20.086	-20.6339	North Atlantic Ocean	31.1	epipelagic	715400	14.308	129820	23.3112	845220	37.6192	0.181465	1.62924	24.491	36.289	0.02	0	0.04	0.43
Atlantic Meridional Transect Project (AMT 3)i	20.086	-20.6339	North Atlantic Ocean	41.2	epipelagic	780600	15.612	82010	15.4023	862610	31.0143	0.10506	0.986571	23.815	36.239	0.11	0.35	0.07	5.15
Atlantic Meridional Transect Project (AMT 3)i	20.086	-20.6339	North Atlantic Ocean	51.5	epipelagic	389460	7.7892	20990	4.474	410450	12.2632	0.0538951	0.574384	20.526	36.016	0.14	0.5	0.08	1.58
Atlantic Meridional Transect Project (AMT 3)i	20.086	-20.6339	North Atlantic Ocean	61.9	epipelagic	382680	7.6536	6120	0.741092	388800	8.39469	0.0159925	0.0968292	18.943	36.214	0.09	0	0.98	1.19
Atlantic Meridional Transect Project (AMT 3)i	20.086	-20.6339	North Atlantic Ocean	80.4	epipelagic	233860	4.6772	2230	0.151733	236090	4.82893	0.00953562	0.032441	19.961	36.903	0.04	0	0.13	2.85
Atlantic Meridional Transect Project (AMT 3)i	20.086	-20.6339	North Atlantic Ocean	100	epipelagic	145830	2.9166	3210	0.151454	149040	3.06805	0.0220119	0.0519281	19.271	36.825	0.03	0	0.08	3.62
Atlantic Meridional Transect Project (AMT 3)i	12.7624	-20.5406	North Atlantic Ocean	8	surface	273500	5.47	135490	10.6481	408990	16.1181	0.495393	1.94663	28.338	35.349	0.05	0	0	0.81
Atlantic Meridional Transect Project (AMT 3)i	12.7624	-20.5406	North Atlantic Ocean	20.4	epipelagic	161400	3.228	128810	10.7287	290210	13.9567	0.798079	3.32365	28.306	35.365	0.05	0	0	2.17
Atlantic Meridional Transect Project (AMT 3)i	12.7624	-20.5406	North Atlantic Ocean	30.9	epipelagic	221300	4.426	182710	13.6717	404010	18.0977	0.825621	3.08895	22.908	35.812	0.05	0	0	3.55
Atlantic Meridional Transect Project (AMT 3)i	12.7624	-20.5406	North Atlantic Ocean	41.1	epipelagic	374300	7.486	95930	7.35103	470230	14.837	0.256292	0.98197	19.435	35.809	0.07	1.27	0.26	4.7
Atlantic Meridional Transect Project (AMT 3)i	12.7624	-20.5406	North Atlantic Ocean	51.1	epipelagic	238670	4.7734	56260	2.77327	294930	7.54667	0.235723	0.580984	18.121	35.759	0.46	12.86	0.89	6.5
Atlantic Meridional Transect Project (AMT 3)i	12.7624	-20.5406	North Atlantic Ocean	61.3	epipelagic	148750	2.975	47280	1.94957	196030	4.92457	0.317849	0.655317	16.968	35.683	0.13	15.41	1.19	7.26
Atlantic Meridional Transect Project (AMT 3)i	12.7624	-20.5406	North Atlantic Ocean	81.6	epipelagic	106870	2.1374	21820	0.812837	128690	2.95024	0.204173	0.380292	15.756	35.606	0.08	16.1	1.38	8.29
Atlantic Meridional Transect Project (AMT 3)i	12.7624	-20.5406	North Atlantic Ocean	101.3	epipelagic	113990	2.2798	10320	0.411533	124310	2.69133	0.0905343	0.180513	14.989	35.55	0.05	16.75	1.59	9
Atlantic Meridional Transect Project (AMT 3)i	9.0537	-22.2761	North Atlantic Ocean	8.5	surface	300700	6.014	179650	9.116	480350	15.13	0.597439	1.5158	28.213	35.518	0.04	0	0	1.5
Atlantic Meridional Transect Project (AMT 3)i	9.0537	-22.2761	North Atlantic Ocean	21.3	epipelagic	256300	5.126	166760	8.31125	423060	13.4372	0.650644	1.62139	27.953	35.675	0.04	0	0	3.34
Atlantic Meridional Transect Project (AMT 3)i	9.0537	-22.2761	North Atlantic Ocean	31.1	epipelagic	255650	5.113	165410	7.31	421060	12.423	0.647017	1.42969	26.133	35.864	0.04	0	0	3.95
Atlantic Meridional Transect Project (AMT 3)i	9.0537	-22.2761	North Atlantic Ocean	40.6	epipelagic	355300	7.106	120910	6.84122	476210	13.9472	0.340304	0.962739	22.418	35.973	0.04	0.01	0.04	4.19
Atlantic Meridional Transect Project (AMT 3)i	9.0537	-22.2761	North Atlantic Ocean	51	epipelagic	253460	5.0692	88370	4.44997	341830	9.51917	0.348655	0.877845	19.684	35.905	0.65	7.44	0.34	5.91
Atlantic Meridional Transect Project (AMT 3)i	9.0537	-22.2761	North Atlantic Ocean	61	epipelagic	212030	4.2406	51400	1.89292	263430	6.13352	0.242419	0.446381	18.235	35.81	0.27	14.2	0.96	7.24
Atlantic Meridional Transect Project (AMT 3)i	9.0537	-22.2761	North Atlantic Ocean	80.8	epipelagic	123870	2.4774	22990	0.827377	146860	3.30478	0.185598	0.33397	16.134	35.647	0.08	16.21	1.25	8.28
Atlantic Meridional Transect Project (AMT 3)i	9.0537	-22.2761	North Atlantic Ocean	100.7	epipelagic	114840	2.2968	12360	0.451418	127200	2.74822	0.107628	0.196542	14.798	35.505	0.05	16.4	1.41	8.8
Atlantic Meridional Transect Project (AMT 3)i	5.1723	-24.0156	North Atlantic Ocean	8	surface	184310	3.6862	148550	7.22218	332860	10.9084	0.805979	1.95925	28.394	34.65	0.05	0	0.02	1.66
Atlantic Meridional Transect Project (AMT 3)i	5.1723	-24.0156	North Atlantic Ocean	20.6	epipelagic	269200	5.384	151560	8.01497	420760	13.399	0.563001	1.48866	28.22	34.863	0.05	0	0.02	1.6
Atlantic Meridional Transect Project (AMT 3)i	5.1723	-24.0156	North Atlantic Ocean	40	epipelagic	182290	3.6458	286560	11.9763	468850	15.6221	1.572	3.28494	27.959	35.575	0.05	0	0.02	1.61
Atlantic Meridional Transect Project (AMT 3)i	5.1723	-24.0156	North Atlantic Ocean	49.9	epipelagic	120310	2.4062	287660	12.0075	407970	14.4137	2.39099	4.99022	27.713	35.68	0.06	0	0.03	2.26
Atlantic Meridional Transect Project (AMT 3)i	5.1723	-24.0156	North Atlantic Ocean	60.2	epipelagic	196730	3.9346	156780	6.49535	353510	10.43	0.79693	1.65083	25.555	35.781	0.06	0	0.07	2.76
Atlantic Meridional Transect Project (AMT 3)i	5.1723	-24.0156	North Atlantic Ocean	69.7	epipelagic	211140	4.2228	95790	3.72448	306930	7.94728	0.45368	0.881993	24.064	35.676	0.17	0.93	0.2	4.23
Atlantic Meridional Transect Project (AMT 3)i	5.1723	-24.0156	North Atlantic Ocean	79.8	epipelagic	155780	3.1156	68320	2.49173	224100	5.60733	0.438567	0.799759	23.121	35.901	0.38	3.43	0.24	6.58
Atlantic Meridional Transect Project (AMT 3)i	5.1723	-24.0156	North Atlantic Ocean	100	epipelagic	64590	1.2918	49280	1.73569	113870	3.02749	0.762966	1.34362	18.595	35.848	0.12	11.7	0.72	7.29
Atlantic Meridional Transect Project (AMT 3)i	1.2933	-25.7806	North Atlantic Ocean	7	surface	239550	4.791	171170	7.11261	410720	11.9036	0.714548	1.48458	26.869	35.603	0.05	0	0	1.36
Atlantic Meridional Transect Project (AMT 3)i	1.2933	-25.7806	North Atlantic Ocean	20	epipelagic	251370	5.0274	213470	8.67083	464840	13.6982	0.849226	1.72471	26.866	35.602	0.05	0	0	1.6
Atlantic Meridional Transect Project (AMT 3)i	1.2933	-25.7806	North Atlantic Ocean	39.7	epipelagic	268150	5.363	243790	9.80718	511940	15.1702	0.909155	1.82868	26.859	35.609	0.05	0	0.02	1.65
Atlantic Meridional Transect Project (AMT 3)i	1.2933	-25.7806	North Atlantic Ocean	59.8	epipelagic	305400	6.108	265800	12.0691	571200	18.1771	0.870334	1.97595	26.308	35.823	0.05	0	0.03	2.16
Atlantic Meridional Transect Project (AMT 3)i	1.2933	-25.7806	North Atlantic Ocean	69.7	epipelagic	177600	3.552	259530	14.3631	437130	17.9151	1.46132	4.04367	25.887	35.909	0.05	0	0.03	3.3
Atlantic Meridional Transect Project (AMT 3)i	1.2933	-25.7806	North Atlantic Ocean	79.6	epipelagic	189130	3.7826	179870	6.90339	369000	10.686	0.951039	1.82504	25.235	35.821	0.22	1.56	0.19	4.47
Atlantic Meridional Transect Project (AMT 3)i	1.2933	-25.7806	North Atlantic Ocean	89.6	epipelagic	170360	3.4072	84970	3.04402	255330	6.45122	0.498767	0.893409	21.781	35.893	0.18	5.83	0.47	6.61
Atlantic Meridional Transect Project (AMT 3)i	1.2933	-25.7806	North Atlantic Ocean	99.2	epipelagic	110400	2.208	46000	1.63113	156400	3.83913	0.416667	0.738735	19.079	35.809	0.11	8.45	0.74	8.16
Atlantic Meridional Transect Project (AMT 3)i	-2.3851	-27.4547	South Atlantic Ocean	8.7	surface	166920	3.3384	93560	3.65434	260480	6.99274	0.560508	1.09464	26.32	36.13	0.04	0	0.04	1.49
Atlantic Meridional Transect Project (AMT 3)i	-2.3851	-27.4547	South Atlantic Ocean	21.2	epipelagic	118080	2.3616	210720	7.97967	328800	10.3413	1.78455	3.37893	26.307	36.129	0.04	0	0.04	1.5
Atlantic Meridional Transect Project (AMT 3)i	-2.3851	-27.4547	South Atlantic Ocean	41	epipelagic	152920	3.0584	172960	6.65268	325880	9.71108	1.13105	2.17522	26.303	36.129	0.04	0	0.04	1.5
Atlantic Meridional Transect Project (AMT 3)i	-2.3851	-27.4547	South Atlantic Ocean	50.5	epipelagic	134080	2.6816	172790	6.61185	306870	9.29345	1.28871	2.46564	26.297	36.13	0.04	0	0.04	1.52
Atlantic Meridional Transect Project (AMT 3)i	-2.3851	-27.4547	South Atlantic Ocean	64.9	epipelagic	160410	3.2082	174920	6.81989	335330	10.0281	1.09046	2.12577	26.278	36.133	0.04	0	0.04	1.92
Atlantic Meridional Transect Project (AMT 3)i	-2.3851	-27.4547	South Atlantic Ocean	74.7	epipelagic	114850	2.297	150220	6.02861	265070	8.32561	1.30797	2.62456	26.232	36.136	0.06	0.11	0.04	4.14
Atlantic Meridional Transect Project (AMT 3)i	-2.3851	-27.4547	South Atlantic Ocean	85.2	epipelagic	153430	3.0686	70560	2.78409	223990	5.85269	0.459884	0.907285	25.033	36.152	0.17	1.72	0.24	7.42
Atlantic Meridional Transect Project (AMT 3)i	-2.3851	-27.4547	South Atlantic Ocean	100.8	epipelagic	94840	1.8968	46070	1.60785	140910	3.50465	0.485765	0.847663	18.031	35.882	0.24	17.31	0.75	9.33
Atlantic Meridional Transect Project (AMT 3)i	-6.4824	-29.2708	South Atlantic Ocean	8	surface	232080	4.6416	161920	5.99719	394000	10.6388	0.69769	1.29205	26.612	36.028	0.04	0	0.04	1.23
Atlantic Meridional Transect Project (AMT 3)i	-6.4824	-29.2708	South Atlantic Ocean	30.4	epipelagic	215200	4.304	128670	4.77825	343870	9.08225	0.597909	1.11019	26.589	36.025	0.04	0	0.04	1.22
Atlantic Meridional Transect Project (AMT 3)i	-6.4824	-29.2708	South Atlantic Ocean	50.4	epipelagic	200120	4.0024	154770	5.73471	354890	9.73711	0.773386	1.43282	26.59	36.025	0.04	0	0.04	1.23
Atlantic Meridional Transect Project (AMT 3)i	-6.4824	-29.2708	South Atlantic Ocean	70	epipelagic	182130	3.6426	180840	6.66836	362970	10.311	0.992917	1.83066	26.585	36.026	0.04	0	0.03	1.21
Atlantic Meridional Transect Project (AMT 3)i	-6.4824	-29.2708	South Atlantic Ocean	88.6	epipelagic	207560	4.1512	218710	8.14649	426270	12.2977	1.05372	1.96244	26.419	36.066	0.04	0	0.05	1.46
Atlantic Meridional Transect Project (AMT 3)i	-6.4824	-29.2708	South Atlantic Ocean	99.9	epipelagic	210500	4.21	102350	3.79799	312850	8.00799	0.486223	0.902136	23.455	36.746	0.05	0.08	0.09	2.13
Atlantic Meridional Transect Project (AMT 3)i	-10.7771	-31.2432	South Atlantic Ocean	8.5	surface	144060	2.8812	99230	3.92175	243290	6.80295	0.68881	1.36115	26.153	36.488	0.04	0.07	0.02	0.91
Atlantic Meridional Transect Project (AMT 3)i	-10.7771	-31.2432	South Atlantic Ocean	26.3	epipelagic	131220	2.6244	96060	3.83863	227280	6.46303	0.732053	1.46267	26.144	36.488	0.04	0.07	0.02	0.91
Atlantic Meridional Transect Project (AMT 3)i	-10.7771	-31.2432	South Atlantic Ocean	51.4	epipelagic	126540	2.5308	99680	3.94467	226220	6.47547	0.787735	1.55867	25.685	36.526	0.04	0.07	0.02	0.91
Atlantic Meridional Transect Project (AMT 3)i	-10.7771	-31.2432	South Atlantic Ocean	76.2	epipelagic	164260	3.2852	132050	4.9055	296310	8.1907	0.803908	1.49321	24.976	36.963	0.04	0.07	0.04	0.97
Atlantic Meridional Transect Project (AMT 3)i	-10.7771	-31.2432	South Atlantic Ocean	101.9	epipelagic	85650	1.713	153740	5.59826	239390	7.31126	1.79498	3.2681	23.868	36.917	0.04	0.07	0.08	1.21
Atlantic Meridional Transect Project (AMT 3)i	-14.8957	-33.1237	South Atlantic Ocean	8.2	surface	125170	2.5034	93100	3.50245	218270	6.00585	0.743788	1.39908	25.978	36.875	0.03	0.07	0.02	1.15
Atlantic Meridional Transect Project (AMT 3)i	-14.8957	-33.1237	South Atlantic Ocean	30.6	epipelagic	107620	2.1524	85570	3.26689	193190	5.41929	0.795112	1.51779	25.955	36.876	0.03	0.07	0.02	1.17
Atlantic Meridional Transect Project (AMT 3)i	-14.8957	-33.1237	South Atlantic Ocean	60.7	epipelagic	115620	2.3124	77630	3.00095	193250	5.31335	0.671424	1.29776	25.431	37.044	0.03	0.07	0.02	1.17
Atlantic Meridional Transect Project (AMT 3)i	-14.8957	-33.1237	South Atlantic Ocean	79.7	epipelagic	127310	2.5462	97920	3.73425	225230	6.28045	0.769146	1.4666	25.19	37.109	0.03	0.07	0.05	1.19
Atlantic Meridional Transect Project (AMT 3)i	-14.8957	-33.1237	South Atlantic Ocean	100.4	epipelagic	98370	1.9674	114840	4.26519	213210	6.23259	1.16743	2.16793	24.767	37.156	0.03	0.07	0.05	1.2
Atlantic Meridional Transect Project (AMT 3)i	-18.8621	-35.047	South Atlantic Ocean	6.4	surface	95280	1.9056	71190	2.81432	166470	4.71992	0.747166	1.47687	24.658	37.112	0.03	0	0	1.11
Atlantic Meridional Transect Project (AMT 3)i	-18.8621	-35.047	South Atlantic Ocean	26.8	epipelagic	137510	2.7502	109950	4.26914	247460	7.01934	0.799578	1.5523	24.016	37.134	0.03	0	0	1.11
Atlantic Meridional Transect Project (AMT 3)i	-18.8621	-35.047	South Atlantic Ocean	52.2	epipelagic	137550	2.751	106850	4.15079	244400	6.90179	0.776808	1.50883	23.937	37.206	0.03	0	0	1.11
Atlantic Meridional Transect Project (AMT 3)i	-18.8621	-35.047	South Atlantic Ocean	76.6	epipelagic	132680	2.6536	122720	4.69364	255400	7.34724	0.924932	1.76878	23.56	37.123	0.03	0	0	1.11
Atlantic Meridional Transect Project (AMT 3)i	-18.8621	-35.047	South Atlantic Ocean	100.5	epipelagic	54190	1.0838	155220	5.75161	209410	6.83541	2.86437	5.30689	23.394	37.083	0.04	0	0	1.38
Atlantic Meridional Transect Project (AMT 3)i	-22.9235	-36.9567	South Atlantic Ocean	6.7	surface	169100	3.382	109410	4.55682	278510	7.93882	0.647014	1.34737	22.445	36.824	0	0.08	0	1.13
Atlantic Meridional Transect Project (AMT 3)i	-22.9235	-36.9567	South Atlantic Ocean	21.9	epipelagic	158320	3.1664	118380	5.04421	276700	8.21061	0.747726	1.59304	22.305	36.818	0	0.08	0	1.13
Atlantic Meridional Transect Project (AMT 3)i	-22.9235	-36.9567	South Atlantic Ocean	42	epipelagic	176120	3.5224	131580	5.56321	307700	9.08561	0.747104	1.57938	22.292	36.818	0	0.08	0	1.23
Atlantic Meridional Transect Project (AMT 3)i	-22.9235	-36.9567	South Atlantic Ocean	60.9	epipelagic	144630	2.8926	106020	4.53303	250650	7.42563	0.733043	1.56711	21.908	36.808	0	0.08	0	1.11
Atlantic Meridional Transect Project (AMT 3)i	-22.9235	-36.9567	South Atlantic Ocean	80.8	epipelagic	109510	2.1902	126210	5.06481	235720	7.25501	1.1525	2.31249	21.821	36.796	0	0.08	0	1.11
Atlantic Meridional Transect Project (AMT 3)i	-22.9235	-36.9567	South Atlantic Ocean	90.7	epipelagic	146720	2.9344	60260	2.46074	206980	5.39514	0.410714	0.838583	21.781	36.789	0	0.08	0	1.11
Atlantic Meridional Transect Project (AMT 3)i	-22.9235	-36.9567	South Atlantic Ocean	100.4	epipelagic	116840	2.3368	50520	2.06073	167360	4.39753	0.432386	0.881861	21.799	36.815	0	0.08	0	1.15
Atlantic Meridional Transect Project (AMT 3)i	-26.6157	-39.6006	South Atlantic Ocean	4.8	surface	203450	4.069	110090	5.37965	313540	9.44865	0.541116	1.32211	20.836	36.616	0.03	0.08	0	1.18
Atlantic Meridional Transect Project (AMT 3)i	-26.6157	-39.6006	South Atlantic Ocean	39.3	epipelagic	200820	4.0164	127720	6.11889	328540	10.1353	0.635992	1.52348	20.745	36.599	0.03	0.08	0	1.2
Atlantic Meridional Transect Project (AMT 3)i	-26.6157	-39.6006	South Atlantic Ocean	69.9	epipelagic	234110	4.6822	88920	4.64221	323030	9.32441	0.379821	0.991459	20.428	36.516	0.03	0.09	0	1.24
Atlantic Meridional Transect Project (AMT 3)i	-26.6157	-39.6006	South Atlantic Ocean	80	epipelagic	203420	4.0684	62670	2.97031	266090	7.03871	0.308082	0.730094	19.696	36.354	0.05	0.1	0	1.45
Atlantic Meridional Transect Project (AMT 3)i	-26.6157	-39.6006	South Atlantic Ocean	94.8	epipelagic	239840	4.7968	39420	1.83855	279260	6.63535	0.16436	0.383287	19.517	36.312	0.17	0.43	0	1.25
Atlantic Meridional Transect Project (AMT 3)i	-29.8536	-42.9138	South Atlantic Ocean	8	surface	237270	4.7454	144630	6.43148	381900	11.1769	0.609559	1.35531	19.755	36.198	0.3	0.07	0	1.22
Atlantic Meridional Transect Project (AMT 3)i	-29.8536	-42.9138	South Atlantic Ocean	50.4	epipelagic	240770	4.8154	182680	8.33041	423450	13.1458	0.758732	1.72995	19.436	36.298	0.03	0.08	0	1.47
Atlantic Meridional Transect Project (AMT 3)i	-29.8536	-42.9138	South Atlantic Ocean	80.9	epipelagic	289300	5.786	118730	6.51635	408030	12.3023	0.410404	1.12623	19.026	36.214	0.03	0.08	0	1.48
Atlantic Meridional Transect Project (AMT 3)i	-29.8536	-42.9138	South Atlantic Ocean	90.8	epipelagic	203960	4.0792	57220	2.65285	261180	6.73205	0.280545	0.650335	18.094	36.014	0.03	0.96	0.02	1.5
Atlantic Meridional Transect Project (AMT 3)i	-29.8536	-42.9138	South Atlantic Ocean	100.4	epipelagic	142970	2.8594	35330	1.60732	178300	4.46672	0.247115	0.562117	18.119	36.041	0.08	1.22	0.03	1.56
Atlantic Meridional Transect Project (AMT 3)i	-32.7977	-46.1178	South Atlantic Ocean	7.4	surface	242300	4.846	134060	11.337	376360	16.183	0.553281	2.33945	18.878	36.153	0.04	0.08	0.02	1.36
Atlantic Meridional Transect Project (AMT 3)i	-32.7977	-46.1178	South Atlantic Ocean	20.2	epipelagic	306900	6.138	126410	10.7128	433310	16.8508	0.411893	1.74533	18.876	36.154	0.04	0.08	0.02	1.35
Atlantic Meridional Transect Project (AMT 3)i	-32.7977	-46.1178	South Atlantic Ocean	40.1	epipelagic	284900	5.698	151970	12.7427	436870	18.4407	0.533415	2.23635	18.877	36.154	0.04	0.1	0.02	1.28
Atlantic Meridional Transect Project (AMT 3)i	-32.7977	-46.1178	South Atlantic Ocean	50.1	epipelagic	238200	4.764	131520	10.9384	369720	15.7024	0.552141	2.29606	18.869	36.182	0.05	0.11	0.02	1.29
Atlantic Meridional Transect Project (AMT 3)i	-32.7977	-46.1178	South Atlantic Ocean	58.8	epipelagic	294600	5.892	56470	4.87534	351070	10.7673	0.191684	0.827451	18.859	36.217	0.08	0.2	0.02	1.47
Atlantic Meridional Transect Project (AMT 3)i	-32.7977	-46.1178	South Atlantic Ocean	69.4	epipelagic	273500	5.47	47830	3.97582	321330	9.44582	0.174881	0.726842	18.778	36.203	0.08	0.36	0.01	1.47
Atlantic Meridional Transect Project (AMT 3)i	-32.7977	-46.1178	South Atlantic Ocean	79.3	epipelagic	292070	5.8414	38960	3.50941	331030	9.35081	0.133393	0.600782	18.569	36.166	0.17	0.8	0.02	1.53
Atlantic Meridional Transect Project (AMT 3)i	-32.7977	-46.1178	South Atlantic Ocean	99.3	epipelagic	228920	4.5784	8680	1.28888	237600	5.86728	0.0379172	0.281514	18.083	36.132	0.36	1.61	0.06	1.55
Atlantic Meridional Transect Project (AMT 3)i	-35.7128	-49.5869	South Atlantic Ocean	7.5	surface	494700	9.894	213200	47.2359	707900	57.1299	0.430968	4.77419	16.436	35.806	0.05	0.09	0.03	1.52
Atlantic Meridional Transect Project (AMT 3)i	-35.7128	-49.5869	South Atlantic Ocean	10	surface	594800	11.896	189450	42.275	784250	54.171	0.31851	3.55371	16.429	35.807	0.06	0.09	0.03	1.51
Atlantic Meridional Transect Project (AMT 3)i	-35.7128	-49.5869	South Atlantic Ocean	19.9	epipelagic	518300	10.366	230550	51.6519	748850	62.0179	0.44482	4.98282	16.426	35.808	0.05	0.09	0.02	1.55
Atlantic Meridional Transect Project (AMT 3)i	-35.7128	-49.5869	South Atlantic Ocean	29.5	epipelagic	471900	9.438	110760	24.5929	582660	34.0309	0.234711	2.60573	16.129	35.807	0.11	0.7	0.06	1.62
Atlantic Meridional Transect Project (AMT 3)i	-35.7128	-49.5869	South Atlantic Ocean	40.1	epipelagic	382410	7.6482	60910	12.8451	443320	20.4933	0.159279	1.6795	15.906	35.799	0.25	1.74	0.09	1.63
Atlantic Meridional Transect Project (AMT 3)i	-35.7128	-49.5869	South Atlantic Ocean	50	epipelagic	301440	6.0288	29900	6.12282	331340	12.1516	0.0991906	1.0156	15.729	35.786	0.32	2.77	0.25	1.84
Atlantic Meridional Transect Project (AMT 3)i	-35.7128	-49.5869	South Atlantic Ocean	59.9	epipelagic	265270	5.3054	10680	2.15511	275950	7.46051	0.0402609	0.406211	15.599	35.773	0.37	3.45	0.11	1.89
Atlantic Meridional Transect Project (AMT 3)i	-35.7128	-49.5869	South Atlantic Ocean	79.8	epipelagic	175510	3.5102	1670	0.319096	177180	3.8293	0.00951513	0.0909054	15.368	35.748	0.17	4.07	0.13	2.25
Atlantic Meridional Transect Project (AMT 3)i	-37.8083	-52.193	South Atlantic Ocean	8.2	epipelagic	423700	8.474	131960	27.304	555660	35.778	0.311447	3.2221	17.136	35.752	0.03	0.07	0.01	1.27
Atlantic Meridional Transect Project (AMT 3)i	-37.8083	-52.193	South Atlantic Ocean	20.8	epipelagic	400100	8.002	161180	35.1577	561280	43.1597	0.402849	4.39361	17.05	35.745	0.03	0.07	0.01	1.31
Atlantic Meridional Transect Project (AMT 3)i	-37.8083	-52.193	South Atlantic Ocean	31.3	epipelagic	481700	9.634	177550	39.471	659250	49.105	0.36859	4.09705	16.601	35.78	0.03	0.07	0.02	1.51
Atlantic Meridional Transect Project (AMT 3)i	-37.8083	-52.193	South Atlantic Ocean	41.1	epipelagic	418400	8.368	44340	7.7243	462740	16.0923	0.105975	0.923076	16.199	35.679	0.03	0.56	0.05	1.52
Atlantic Meridional Transect Project (AMT 3)i	-37.8083	-52.193	South Atlantic Ocean	50.3	epipelagic	434500	8.69	84920	18.5795	519420	27.2695	0.195443	2.13803	16.376	35.759	0.12	0.24	0.03	1.86
Atlantic Meridional Transect Project (AMT 3)i	-37.8083	-52.193	South Atlantic Ocean	60.9	epipelagic	380620	7.6124	50840	10.968	431460	18.5804	0.133572	1.4408	16.482	35.804	0.08	0.66	0.05	2.16
Atlantic Meridional Transect Project (AMT 3)i	-37.8083	-52.193	South Atlantic Ocean	80.7	epipelagic	296430	5.9286	10700	2.11697	307130	8.04557	0.0360962	0.357077	15.419	35.595	0.14	3.65	0.24	2.01
Atlantic Meridional Transect Project (AMT 3)i	-37.8083	-52.193	South Atlantic Ocean	100.5	epipelagic	190970	3.8194	2510	0.451003	193480	4.2704	0.0131434	0.118082	15.083	35.621	0.54	4.9	0.28	1.98
Atlantic Meridional Transect Project (AMT 3)i	-43.5773	-55.0038	South Atlantic Ocean	2.6	surface	539600	10.792	15040	2.91643	554640	13.7084	0.0278725	0.27024	10.864	34.721	0	9.08	0.59	2.09
Atlantic Meridional Transect Project (AMT 3)i	-43.5773	-55.0038	South Atlantic Ocean	7.2	surface	517100	10.342	15090	3.04276	532190	13.3848	0.029182	0.294214	10.851	34.724	0	9.13	0.56	2.1
Atlantic Meridional Transect Project (AMT 3)i	-43.5773	-55.0038	South Atlantic Ocean	20	epipelagic	695800	13.916	12860	2.60789	708660	16.5239	0.0184823	0.187402	10.87	34.741	0	9.11	0.56	2.69
Atlantic Meridional Transect Project (AMT 3)i	-43.5773	-55.0038	South Atlantic Ocean	29.8	epipelagic	705100	14.102	15900	3.04486	721000	17.1469	0.02255	0.215917	10.879	34.747	0	9.25	0.57	3.38
Atlantic Meridional Transect Project (AMT 3)i	-43.5773	-55.0038	South Atlantic Ocean	39.6	epipelagic	595870	11.9174	12270	2.33628	608140	14.2537	0.0205917	0.19604	10.898	34.772	0	11.23	0.62	4.44
Atlantic Meridional Transect Project (AMT 3)i	-43.5773	-55.0038	South Atlantic Ocean	49.3	epipelagic	441290	8.8258	4780	0.948821	446070	9.77462	0.0108319	0.107505	10.152	34.723	0	13.88	0.83	6.91
Atlantic Meridional Transect Project (AMT 3)i	-43.5773	-55.0038	South Atlantic Ocean	59.2	epipelagic	272250	5.445	970	0.19182	273220	5.63682	0.0035629	0.0352286	8.671	34.505	0	14	1.1	8.57
Atlantic Meridional Transect Project (AMT 3)i	-43.5773	-55.0038	South Atlantic Ocean	99.7	epipelagic	180790	3.6158	250	0.0536536	181040	3.66945	0.00138282	0.0148387	7.678	34.449	0	20.3	1.35	9.64
Atlantic Meridional Transect Project (AMT 3)i	-48.0036	-55.8768	South Atlantic Ocean	5.8	surface	172000	3.44	1690	0.0043771	173690	3.44438	0.00982558	0.00127241	5.432	34.093	0	35.02	1.54	6.03
Atlantic Meridional Transect Project (AMT 3)i	-48.0036	-55.8768	South Atlantic Ocean	19.9	epipelagic	157000	3.14	1260	0.0032634	158260	3.14326	0.00802548	0.0010393	5.417	34.094	0	35.03	1.56	4.68
Atlantic Meridional Transect Project (AMT 3)i	-48.0036	-55.8768	South Atlantic Ocean	39.5	epipelagic	92900	1.858	640	0.0016576	93540	1.85966	0.00688913	0.000892142	5.083	34.107	0	34.97	1.55	6.46
Atlantic Meridional Transect Project (AMT 3)i	-48.0036	-55.8768	South Atlantic Ocean	59.7	epipelagic	125000	2.5	110	0.0002849	125110	2.50028	0.00088	0.00011396	4.884	34.116	0	34.87	1.55	8.3
Atlantic Meridional Transect Project (AMT 3)i	-48.0036	-55.8768	South Atlantic Ocean	69.5	epipelagic	82800	1.656	1010	0.0026159	83810	1.65862	0.0121981	0.00157965	4.687	34.114	0	35.37	1.58	10.41
Atlantic Meridional Transect Project (AMT 3)i	-48.0036	-55.8768	South Atlantic Ocean	79	epipelagic	107000	2.14	100	0.000259	107100	2.14026	0.000934579	0.000121028	4.428	34.108	0	36.72	1.62	11.07
Atlantic Meridional Transect Project (AMT 3)i	-48.0036	-55.8768	South Atlantic Ocean	99.3	epipelagic	105000	2.1	330	0.0008547	105330	2.10085	0.00314286	0.000407	4.003	34.125	0	38.18	1.66	11.55
Atlantic Meridional Transect Project (AMT 3)i	-51.9314	-57.8948	South Atlantic Ocean	1.4	surface	312430	6.2486	5040	0.156927	317470	6.40553	0.0161316	0.025114	6.228	33.741	0.11	27.05	1.12	2.78
Atlantic Meridional Transect Project (AMT 3)i	-51.9314	-57.8948	South Atlantic Ocean	6.1	surface	333480	6.6696	6180	0.147259	339660	6.81686	0.0185318	0.0220792	6.227	33.741	0.11	26.3	1.13	2.81
Atlantic Meridional Transect Project (AMT 3)i	-51.9314	-57.8948	South Atlantic Ocean	19	epipelagic	321480	6.4296	4080	0.14182	325560	6.57142	0.0126913	0.0220574	6.192	33.743	0.11	27.17	1.13	3.11
Atlantic Meridional Transect Project (AMT 3)i	-51.9314	-57.8948	South Atlantic Ocean	28.7	epipelagic	259580	5.1916	2970	0.113705	262550	5.3053	0.0114416	0.0219016	6.116	33.742	0.11	27.24	1.13	3.21
Atlantic Meridional Transect Project (AMT 3)i	-51.9314	-57.8948	South Atlantic Ocean	38.6	epipelagic	221700	4.434	1390	0.0793231	223090	4.51332	0.00626973	0.0178897	6.079	33.743	0.11	28.26	1.15	3.24
Atlantic Meridional Transect Project (AMT 3)i	-51.9314	-57.8948	South Atlantic Ocean	48.6	epipelagic	250650	5.013	1230	0.0915292	251880	5.10453	0.00490724	0.0182584	6.007	33.744	0.11	28.27	1.16	0
Atlantic Meridional Transect Project (AMT 3)i	-51.9314	-57.8948	South Atlantic Ocean	57.8	epipelagic	230720	4.6144	1350	0.0741713	232070	4.68857	0.00585125	0.0160739	6.003	33.743	0.11	28.36	1.16	0
Atlantic Meridional Transect Project (AMT 4)i	-50.9915	-57.2882	South Atlantic Ocean	96.7	epipelagic	561723	11.2345	12692.1	1.3202	574415	12.5547	0.0225949	0.117513	7.767	33.835	0.24	16.42	1.38	2.77
Atlantic Meridional Transect Project (AMT 4)i	-50.9915	-57.2882	South Atlantic Ocean	87.6	epipelagic	511957	10.2391	12378.9	1.09236	524336	11.3315	0.0241796	0.106685	7.768	33.835	0.24	16.42	1.38	2.77
Atlantic Meridional Transect Project (AMT 4)i	-50.9915	-57.2882	South Atlantic Ocean	76.6	epipelagic	602576	12.0515	15017.3	1.52971	617593	13.5812	0.0249218	0.126931	7.779	33.834	0.24	16.42	1.38	2.78
Atlantic Meridional Transect Project (AMT 4)i	-50.9915	-57.2882	South Atlantic Ocean	66.9	epipelagic	591615	11.8323	15093.9	1.52822	606709	13.3605	0.025513	0.129157	7.784	33.834	0.24	16.46	1.38	2.8
Atlantic Meridional Transect Project (AMT 4)i	-50.9915	-57.2882	South Atlantic Ocean	57.6	epipelagic	612332	12.2466	14577.6	1.55547	626909	13.8021	0.0238066	0.127012	7.788	33.833	0.24	16.56	1.38	2.81
Atlantic Meridional Transect Project (AMT 4)i	-50.9915	-57.2882	South Atlantic Ocean	47.7	epipelagic	532396	10.6479	12738.7	1.49858	545135	12.1465	0.0239271	0.140739	7.793	33.832	0.24	16.49	1.38	2.81
Atlantic Meridional Transect Project (AMT 4)i	-50.9915	-57.2882	South Atlantic Ocean	37.8	epipelagic	587337	11.7467	13098.5	1.66852	600436	13.4153	0.0223015	0.142041	7.796	33.832	0.24	16.44	1.38	2.81
Atlantic Meridional Transect Project (AMT 4)i	-50.9915	-57.2882	South Atlantic Ocean	28.2	epipelagic	605169	12.1034	12468.9	1.6425	617638	13.7459	0.0206039	0.135706	7.804	33.831	0.24	16.46	1.38	2.81
Atlantic Meridional Transect Project (AMT 4)i	-50.9915	-57.2882	South Atlantic Ocean	18.2	epipelagic	578313	11.5663	11512.8	1.65516	589825	13.2214	0.0199076	0.143103	7.836	33.827	0.24	16.42	1.38	2.84
Atlantic Meridional Transect Project (AMT 4)i	-50.9915	-57.2882	South Atlantic Ocean	5.3	surface	519815	10.3963	12149.1	1.89057	531964	12.2869	0.0233719	0.18185	7.843	33.827	0.24	16.42	1.38	2.84
Atlantic Meridional Transect Project (AMT 4)i	-47.621	-55.9422	South Atlantic Ocean	78	epipelagic	243349	4.86698	499.688	0.10724	243849	4.97422	0.00205338	0.0220342	6.351	34.16	0.03	19.14	1.73	6.09
Atlantic Meridional Transect Project (AMT 4)i	-47.621	-55.9422	South Atlantic Ocean	58.3	epipelagic	291917	5.83833	1412.45	0.241616	293329	6.07995	0.00483854	0.0413845	7.093	34.149	0.11	18.36	1.41	3.93
Atlantic Meridional Transect Project (AMT 4)i	-47.621	-55.9422	South Atlantic Ocean	48.1	epipelagic	395824	7.91648	8741.2	1.76486	404565	9.68135	0.0220835	0.222935	8.041	34.156	0.19	17.23	1.23	2.86
Atlantic Meridional Transect Project (AMT 4)i	-47.621	-55.9422	South Atlantic Ocean	38.4	epipelagic	591715	11.8343	35211.3	7.55198	626926	19.3863	0.0595073	0.638144	9.715	34.168	0.24	13.93	0.95	1.22
Atlantic Meridional Transect Project (AMT 4)i	-47.621	-55.9422	South Atlantic Ocean	28.8	epipelagic	652990	13.0598	44745.4	9.73091	697735	22.7907	0.0685238	0.745104	10.128	34.194	0.25	12.53	0.77	1.2
Atlantic Meridional Transect Project (AMT 4)i	-47.621	-55.9422	South Atlantic Ocean	18.7	epipelagic	796980	15.9396	65915.5	15.1049	862895	31.0445	0.0827066	0.947634	10.972	34.221	0.27	10.17	0.75	0.93
Atlantic Meridional Transect Project (AMT 4)i	-47.621	-55.9422	South Atlantic Ocean	6.3	surface	838344	16.7669	69190.1	15.8642	907534	32.6311	0.0825318	0.946166	11.031	34.223	0.27	10	0.62	0.87
Atlantic Meridional Transect Project (AMT 4)i	-47.621	-55.9422	South Atlantic Ocean	1.1	surface	845680	16.9136	72634.6	16.5946	918314	33.5082	0.085889	0.98114	11.034	34.222
Atlantic Meridional Transect Project (AMT 4)i	-43.4812	-54.4025	South Atlantic Ocean	97.9	epipelagic	300093	6.00186	746.2	0.114605	300839	6.11646	0.00248656	0.019095	7.039	34.128	0.12	19.33	1.62	4.43
Atlantic Meridional Transect Project (AMT 4)i	-43.4812	-54.4025	South Atlantic Ocean	78.4	epipelagic	338112	6.76224	2132	0.42342	340244	7.18566	0.0063056	0.0626153	7.884	34.048	0.51	18.54	1.48	3.13
Atlantic Meridional Transect Project (AMT 4)i	-43.4812	-54.4025	South Atlantic Ocean	67.3	epipelagic	236430	4.7286	1898.81	0.358071	238329	5.08667	0.00803118	0.0757246	9.561	34.147	0.63	17.8	1.41	2.41
Atlantic Meridional Transect Project (AMT 4)i	-43.4812	-54.4025	South Atlantic Ocean	58.3	epipelagic	445306	8.90612	3048.09	0.661228	448354	9.56735	0.00684494	0.0742442	11.806	34.457	0.49	15.55	1.18	1.76
Atlantic Meridional Transect Project (AMT 4)i	-43.4812	-54.4025	South Atlantic Ocean	48.4	epipelagic	468664	9.37329	2611.7	0.475113	471276	9.8484	0.00557265	0.050688	14.257	34.345	0.27	14.69	1.09	3.1
Atlantic Meridional Transect Project (AMT 4)i	-43.4812	-54.4025	South Atlantic Ocean	38.2	epipelagic	748320	14.9664	17818.9	3.21276	766139	18.1792	0.0238118	0.214665	14.346	34.374	0.16	7.8	0.6	0.82
Atlantic Meridional Transect Project (AMT 4)i	-43.4812	-54.4025	South Atlantic Ocean	28.5	epipelagic	782905	15.6581	20690.4	3.91809	803595	19.5762	0.0264277	0.250228	14.243	34.334	0.15	7.41	0.56	0.68
Atlantic Meridional Transect Project (AMT 4)i	-43.4812	-54.4025	South Atlantic Ocean	18.8	epipelagic	783797	15.6759	23182.2	4.55013	806979	20.2261	0.0295768	0.290262	14.222	34.328	0.15	7.75	0.54	0.73
Atlantic Meridional Transect Project (AMT 4)i	-43.4812	-54.4025	South Atlantic Ocean	6.2	surface	808968	16.1794	32036.6	6.86604	841005	23.0454	0.0396019	0.42437	14.189	34.313	0.15	7.9	0.54	0.73
Atlantic Meridional Transect Project (AMT 4)i	-39.4377	-52.9695	South Atlantic Ocean	99	epipelagic	221224	4.42449	956.069	0.205119	222180	4.62961	0.00432172	0.0463599	6.055	34.119	0.02	20.14	1.37	5.46
Atlantic Meridional Transect Project (AMT 4)i	-39.4377	-52.9695	South Atlantic Ocean	78.8	epipelagic	342911	6.85822	3874.24	0.897122	346785	7.75534	0.0112981	0.13081	7.719	34.067	0.56	19.37	1.38	4.18
Atlantic Meridional Transect Project (AMT 4)i	-39.4377	-52.9695	South Atlantic Ocean	59	epipelagic	511388	10.2278	29175.1	7.33202	540563	17.5598	0.0570508	0.716875	9.537	34.043	0.43	17.03	1.11	1.53
Atlantic Meridional Transect Project (AMT 4)i	-39.4377	-52.9695	South Atlantic Ocean	39.1	epipelagic	743745	14.8749	101876	25.7413	845621	40.6162	0.136978	1.73052	10.183	34.037	0.25	15.79	0.98	0.91
Atlantic Meridional Transect Project (AMT 4)i	-39.4377	-52.9695	South Atlantic Ocean	29.1	epipelagic	779583	15.5917	118070	29.7907	897653	45.3824	0.151452	1.91068	10.948	34.02	0.24	15.25	0.92	0.71
Atlantic Meridional Transect Project (AMT 4)i	-39.4377	-52.9695	South Atlantic Ocean	15.1	epipelagic	929290	18.5858	139336	35.0885	1.06863e+06	53.6742	0.149938	1.88792	11.46	34.002	0.2	14.83	0.88	0.6
Atlantic Meridional Transect Project (AMT 4)i	-39.4377	-52.9695	South Atlantic Ocean	19.6	epipelagic	977663	19.5533	131358	33.276	1.10902e+06	52.8292	0.134359	1.70181	12.6	34.029	0.18	12.6	0.77	0.37
Atlantic Meridional Transect Project (AMT 4)i	-39.4377	-52.9695	South Atlantic Ocean	6.9	surface	934946	18.6989	133813	33.3815	1.06876e+06	52.0805	0.143124	1.78521	13.401	34.029	0.14	12.08	0.62	0.31
Atlantic Meridional Transect Project (AMT 4)i	-39.4377	-52.9695	South Atlantic Ocean	2.2	surface	988249	19.765	136578	34.0479	1.12483e+06	53.8129	0.138202	1.72264	13.436	34.027	0.14	11.61	0.55	0.24
Atlantic Meridional Transect Project (AMT 4)i	-35.6517	-49.818	South Atlantic Ocean	7.4	surface	581955	11.6391	32073.3	6.93929	614028	18.5784	0.055113	0.596205	19.07	35.737	0.01	0	0	0.53
Atlantic Meridional Transect Project (AMT 4)i	-35.6517	-49.818	South Atlantic Ocean	20	epipelagic	545953	10.9191	33119.3	7.26404	579073	18.1831	0.0606632	0.665262	19.415	36.025	0.02	0	0	0.61
Atlantic Meridional Transect Project (AMT 4)i	-35.6517	-49.818	South Atlantic Ocean	39.2	epipelagic	494676	9.89351	21023.5	4.65385	515699	14.5474	0.0424996	0.470394	19.421	36.035	0.07	0	0	0.7
Atlantic Meridional Transect Project (AMT 4)i	-35.6517	-49.818	South Atlantic Ocean	59.8	epipelagic	473552	9.47105	15906.7	3.64084	489459	13.1119	0.0335902	0.384418	19.419	36.035	0.13	0	0	0.73
Atlantic Meridional Transect Project (AMT 4)i	-35.6517	-49.818	South Atlantic Ocean	79.9	epipelagic	454400	9.08801	13938	3.10769	468338	12.1957	0.0306733	0.341955	19.439	36.044	0.13	0	0	0.73
Atlantic Meridional Transect Project (AMT 4)i	-35.6517	-49.818	South Atlantic Ocean	99.1	epipelagic	409439	8.18878	7995	1.77806	417434	9.96684	0.0195267	0.217134	19.367	36.039	0.16	0.12	0	0.78
Atlantic Meridional Transect Project (AMT 4)i	-32.608	-46.1945	South Atlantic Ocean	6.2	surface	287086	5.74171	127244	6.20367	414330	11.9454	0.443228	1.08046	21.352	36.097	-	-	-	-
Atlantic Meridional Transect Project (AMT 4)i	-32.608	-46.1945	South Atlantic Ocean	21.2	epipelagic	279627	5.59253	115173	5.77291	394800	11.3654	0.411881	1.03225	21.336	36.096	-	-	-	-
Atlantic Meridional Transect Project (AMT 4)i	-32.608	-46.1945	South Atlantic Ocean	46	epipelagic	330184	6.60368	100217	5.48308	430401	12.0868	0.30352	0.830306	21.282	36.107	-	-	-	-
Atlantic Meridional Transect Project (AMT 4)i	-32.608	-46.1945	South Atlantic Ocean	60.3	epipelagic	320886	6.41772	61804.7	3.39154	382691	9.80926	0.192606	0.528465	21.111	36.095	-	-	-	-
Atlantic Meridional Transect Project (AMT 4)i	-32.608	-46.1945	South Atlantic Ocean	70.3	epipelagic	226384	4.52767	28815.3	1.21897	255199	5.74664	0.127285	0.269226	20.865	36.267	-	-	-	-
Atlantic Meridional Transect Project (AMT 4)i	-32.608	-46.1945	South Atlantic Ocean	80	epipelagic	170241	3.40481	19611.1	0.741337	189852	4.14615	0.115196	0.217732	19.393	36.118	-	-	-	-
Atlantic Meridional Transect Project (AMT 4)i	-32.608	-46.1945	South Atlantic Ocean	90.5	epipelagic	162392	3.24783	10799.9	0.395251	173192	3.64308	0.0665053	0.121697	18.986	36.089	-	-	-	-
Atlantic Meridional Transect Project (AMT 4)i	-29.328	-42.65	South Atlantic Ocean	5.7	surface	247121	4.94241	176057	8.32966	423178	13.2721	0.712434	1.68534	23.521	36.38	0.02	0	0	0.52
Atlantic Meridional Transect Project (AMT 4)i	-29.328	-42.65	South Atlantic Ocean	27	epipelagic	248443	4.96887	166596	6.54438	415039	11.5133	0.670558	1.31708	23.468	36.38	0.01	0	0	0.52
Atlantic Meridional Transect Project (AMT 4)i	-29.328	-42.65	South Atlantic Ocean	41.4	epipelagic	258100	5.16201	174014	6.80094	432114	11.963	0.67421	1.3175	23.44	36.379	0	0	0	0.54
Atlantic Meridional Transect Project (AMT 4)i	-29.328	-42.65	South Atlantic Ocean	51.7	epipelagic	245433	4.90866	141726	5.61002	387159	10.5187	0.577452	1.14288	23.435	36.379	0.01	0	0	0.55
Atlantic Meridional Transect Project (AMT 4)i	-29.328	-42.65	South Atlantic Ocean	61.9	epipelagic	270372	5.40745	177235	7.0321	447607	12.4395	0.655522	1.30045	23.402	36.376	0	0	0	0.56
Atlantic Meridional Transect Project (AMT 4)i	-29.328	-42.65	South Atlantic Ocean	72.6	epipelagic	298360	5.9672	181647	7.35727	480007	13.3245	0.608818	1.23295	21.633	36.297	0.01	0	0	0.66
Atlantic Meridional Transect Project (AMT 4)i	-29.328	-42.65	South Atlantic Ocean	92	epipelagic	268103	5.36206	48463	1.83916	316566	7.20122	0.180763	0.342995	19.196	36.063	0.01	0	0	0.74
Atlantic Meridional Transect Project (AMT 4)i	-26.103	-39.1872	South Atlantic Ocean	5.7	surface	144786	2.89572	143268	5.51551	288054	8.41122	0.989516	1.90471	25.295	36.753	0.02	0	0	0.75
Atlantic Meridional Transect Project (AMT 4)i	-26.103	-39.1872	South Atlantic Ocean	20.6	epipelagic	143681	2.87362	129287	5.06975	272968	7.94336	0.899819	1.76424	25.247	36.752	0.02	0	0	0.75
Atlantic Meridional Transect Project (AMT 4)i	-26.103	-39.1872	South Atlantic Ocean	30.9	epipelagic	128901	2.57802	106474	4.22693	235375	6.80496	0.826011	1.6396	25.242	36.753	0.02	0	0	0.75
Atlantic Meridional Transect Project (AMT 4)i	-26.103	-39.1872	South Atlantic Ocean	55.4	epipelagic	128100	2.562	123074	4.8671	251174	7.4291	0.960764	1.89972	25.236	36.753	0.02	0	0	0.75
Atlantic Meridional Transect Project (AMT 4)i	-26.103	-39.1872	South Atlantic Ocean	70	epipelagic	144206	2.88412	127275	5.04982	271481	7.93394	0.882595	1.75091	25.197	36.747	0.02	0	0	0.75
Atlantic Meridional Transect Project (AMT 4)i	-26.103	-39.1872	South Atlantic Ocean	80.2	epipelagic	81062.3	1.62125	172525	6.68619	253588	8.30744	2.12831	4.12411	22.354	36.432	0.02	0	0	0.75
Atlantic Meridional Transect Project (AMT 4)i	-26.103	-39.1872	South Atlantic Ocean	89.9	epipelagic	67040.6	1.34081	108462	4.15931	175503	5.50012	1.61786	3.10208	21.514	36.492	0.02	0	0	0.76
Atlantic Meridional Transect Project (AMT 4)i	-22.1545	-36.6298	South Atlantic Ocean	92.1	epipelagic	260362	5.20724	98142	3.67778	358504	8.88502	0.376944	0.706282	23.604	36.984	0	0	0	0.78
Atlantic Meridional Transect Project (AMT 4)i	-22.1545	-36.6298	South Atlantic Ocean	81.2	epipelagic	267665	5.3533	117465	4.46954	385130	9.82284	0.438853	0.834914	24.173	36.983	0	0	0	0.66
Atlantic Meridional Transect Project (AMT 4)i	-22.1545	-36.6298	South Atlantic Ocean	71.3	epipelagic	272416	5.44833	114812	4.38003	387228	9.82836	0.421457	0.803922	25.719	37.087	0	0	0	0.66
Atlantic Meridional Transect Project (AMT 4)i	-22.1545	-36.6298	South Atlantic Ocean	51.6	epipelagic	250150	5.003	120065	4.54162	370216	9.54463	0.479973	0.90778	26.283	37.083	0	0	0	0.66
Atlantic Meridional Transect Project (AMT 4)i	-22.1545	-36.6298	South Atlantic Ocean	31.8	epipelagic	260786	5.21572	118729	4.55295	379515	9.76867	0.455275	0.872929	26.282	37.071	0	0	0	0.66
Atlantic Meridional Transect Project (AMT 4)i	-22.1545	-36.6298	South Atlantic Ocean	21.9	epipelagic	223519	4.47038	117777	4.48059	341296	8.95097	0.526922	1.00228	26.29	37.071	0	0	0	0.66
Atlantic Meridional Transect Project (AMT 4)i	-22.1545	-36.6298	South Atlantic Ocean	4.8	surface	230923	4.61845	116001	4.32053	346924	8.93899	0.502338	0.935493	26.339	37.072	0	0	0	0.66
Atlantic Meridional Transect Project (AMT 4)i	-18.2723	-34.7645	South Atlantic Ocean	7.3	surface	303288	6.06576	174491	6.52909	477779	12.5948	0.575331	1.07638	26.758	37.249	0.01	0	0	0.69
Atlantic Meridional Transect Project (AMT 4)i	-18.2723	-34.7645	South Atlantic Ocean	20.3	epipelagic	328358	6.56717	162903	6.0867	491262	12.6539	0.496115	0.926838	26.741	37.247	0.01	0	0	0.69
Atlantic Meridional Transect Project (AMT 4)i	-18.2723	-34.7645	South Atlantic Ocean	39.6	epipelagic	320637	6.41274	161460	6.01439	482097	12.4271	0.50356	0.937881	26.737	37.249	0	0	0	0.69
Atlantic Meridional Transect Project (AMT 4)i	-18.2723	-34.7645	South Atlantic Ocean	60.2	epipelagic	309670	6.19339	163930	6.08858	473600	12.282	0.529371	0.983076	26.736	37.249	0.01	0	0	0.69
Atlantic Meridional Transect Project (AMT 4)i	-18.2723	-34.7645	South Atlantic Ocean	79.5	epipelagic	326383	6.52766	188953	7.00944	515336	13.5371	0.578929	1.07381	26.736	37.253	0.01	0	0	0.69
Atlantic Meridional Transect Project (AMT 4)i	-18.2723	-34.7645	South Atlantic Ocean	89.1	epipelagic	342339	6.84679	139103	5.21614	481442	12.0629	0.406331	0.761838	26.041	37.242	0.01	0	0.01	0.69
Atlantic Meridional Transect Project (AMT 4)i	-18.2723	-34.7645	South Atlantic Ocean	99.3	epipelagic	270145	5.4029	79623.6	2.92681	349769	8.32971	0.294744	0.541711	24.88	37.155	0.01	0	0.02	0.69
Atlantic Meridional Transect Project (AMT 4)i	-14.1082	-32.855	South Atlantic Ocean	8.2	surface	294766	5.89531	112660	4.28142	407426	10.1767	0.382203	0.726241	26.618	37.071	0	0	0.06	0.57
Atlantic Meridional Transect Project (AMT 4)i	-14.1082	-32.855	South Atlantic Ocean	25.6	epipelagic	299130	5.98261	117927	4.43633	417057	10.4189	0.394232	0.741537	26.619	37.071	0	0	0.06	0.57
Atlantic Meridional Transect Project (AMT 4)i	-14.1082	-32.855	South Atlantic Ocean	50.3	epipelagic	295567	5.91133	112198	4.14274	407764	10.0541	0.379602	0.700813	26.599	37.097	0	0	0.06	0.57
Atlantic Meridional Transect Project (AMT 4)i	-14.1082	-32.855	South Atlantic Ocean	69.6	epipelagic	304131	6.08261	114759	4.25383	418890	10.3364	0.377334	0.699343	26.496	37.174	0	0	0.06	0.57
Atlantic Meridional Transect Project (AMT 4)i	-14.1082	-32.855	South Atlantic Ocean	79	epipelagic	299876	5.99753	111497	4.16439	411373	10.1619	0.371809	0.694351	26.451	37.186	0	0	0.06	0.57
Atlantic Meridional Transect Project (AMT 4)i	-14.1082	-32.855	South Atlantic Ocean	99.8	epipelagic	308109	6.16217	119992	4.54873	428101	10.7109	0.389447	0.73817	24.786	37.142	0	0	0.06	0.57
Atlantic Meridional Transect Project (AMT 4)i	-10.0303	-30.9468	South Atlantic Ocean	5.6	surface	360984	7.21968	126539	4.66354	487523	11.8832	0.350539	0.645947	27.614	36.658	0	0	0.09	0.68
Atlantic Meridional Transect Project (AMT 4)i	-10.0303	-30.9468	South Atlantic Ocean	42	epipelagic	339547	6.79093	124530	4.65014	464077	11.4411	0.366754	0.684757	27.601	36.671	0	0	0.09	0.68
Atlantic Meridional Transect Project (AMT 4)i	-10.0303	-30.9468	South Atlantic Ocean	51.1	epipelagic	368084	7.36168	144367	5.39962	512451	12.7613	0.392213	0.733476	27.629	36.848	0	0	0.09	0.68
Atlantic Meridional Transect Project (AMT 4)i	-10.0303	-30.9468	South Atlantic Ocean	61.2	epipelagic	386427	7.72855	143297	5.39441	529724	13.123	0.370824	0.697984	27.401	37.01	0	0	0.09	0.68
Atlantic Meridional Transect Project (AMT 4)i	-10.0303	-30.9468	South Atlantic Ocean	101.4	epipelagic	320043	6.40086	112707	4.20322	432750	10.6041	0.352161	0.656665	24.135	37.051	0	0	0.16	0.68
Atlantic Meridional Transect Project (AMT 4)i	-5.915	-29.1212	South Atlantic Ocean	7.1	surface	353318	7.06636	93096.8	3.54905	446415	10.6154	0.263493	0.502246	28.23	35.94	0	0.06	0.09	0.73
Atlantic Meridional Transect Project (AMT 4)i	-5.915	-29.1212	South Atlantic Ocean	20.1	epipelagic	350915	7.01829	95088.4	3.62256	446003	10.6408	0.270973	0.516159	28.191	35.94	0	0.06	0.09	0.73
Atlantic Meridional Transect Project (AMT 4)i	-5.915	-29.1212	South Atlantic Ocean	39.2	epipelagic	342364	6.84729	85870.5	3.44446	428235	10.2918	0.250816	0.50304	28.157	35.946	0	0.06	0.09	0.73
Atlantic Meridional Transect Project (AMT 4)i	-5.915	-29.1212	South Atlantic Ocean	60.3	epipelagic	352053	7.04106	103855	4.16958	455908	11.2106	0.294999	0.592182	28.127	35.955	0	0.06	0.09	0.73
Atlantic Meridional Transect Project (AMT 4)i	-5.915	-29.1212	South Atlantic Ocean	69.8	epipelagic	433180	8.6636	128683	4.93426	561863	13.5979	0.297066	0.569539	28.015	35.95	0	0.06	0.09	0.96
Atlantic Meridional Transect Project (AMT 4)i	-5.915	-29.1212	South Atlantic Ocean	89.7	epipelagic	393411	7.86823	117117	4.50984	510528	12.3781	0.297695	0.573171	26.424	36.317	0.01	0.06	0.17	1.08
Atlantic Meridional Transect Project (AMT 4)i	-2.0158	-27.3388	South Atlantic Ocean	5.3	surface	390986	7.81971	104597	4.12333	495583	11.943	0.267521	0.527299	27.713	36.037	0	0	0.03	0.75
Atlantic Meridional Transect Project (AMT 4)i	-2.0158	-27.3388	South Atlantic Ocean	20.7	epipelagic	382670	7.65341	102916	4.04827	485587	11.7017	0.268942	0.528951	27.632	36.036	0	0	0.03	0.75
Atlantic Meridional Transect Project (AMT 4)i	-2.0158	-27.3388	South Atlantic Ocean	39.9	epipelagic	402202	8.04403	103549	4.15071	505750	12.1947	0.257455	0.515998	27.523	36.052	0	0	0.03	0.75
Atlantic Meridional Transect Project (AMT 4)i	-2.0158	-27.3388	South Atlantic Ocean	50	epipelagic	502371	10.0474	107513	4.75255	609884	14.8	0.214011	0.473012	27.216	36.063	0	0	0.03	0.83
Atlantic Meridional Transect Project (AMT 4)i	-2.0158	-27.3388	South Atlantic Ocean	60.2	epipelagic	645753	12.9151	108679	6.90855	754432	19.8236	0.168298	0.534922	24.089	36.028	0.05	0.6	0.27	2.03
Atlantic Meridional Transect Project (AMT 4)i	-2.0158	-27.3388	South Atlantic Ocean	70.7	epipelagic	497368	9.94737	83854.2	3.5614	581223	13.5088	0.168596	0.358024	20.799	35.959	0.24	6.9	0.54	2.5
Atlantic Meridional Transect Project (AMT 4)i	-2.0158	-27.3388	South Atlantic Ocean	91.4	epipelagic	231237	4.62474	23612.7	0.804535	254850	5.42927	0.102115	0.173963	14.867	35.512	0.1	17.92	1.18	4.98
Atlantic Meridional Transect Project (AMT 4)i	-2.0158	-27.3388	South Atlantic Ocean	101	epipelagic	189935	3.79871	17706.4	0.628229	207642	4.42694	0.0932234	0.16538	14.221	35.438	0.06	18.81	1.27	5.64
Atlantic Meridional Transect Project (AMT 4)i	-0.12933	-26.4698	South Atlantic Ocean	101.9	epipelagic	190084	3.80167	33672.3	1.19907	223756	5.00074	0.177145	0.315405	18.048	35.98	0.08	9.52	0.63	2.46
Atlantic Meridional Transect Project (AMT 4)i	-0.12933	-26.4698	South Atlantic Ocean	91	epipelagic	315746	6.31491	53360	1.89548	369106	8.21039	0.168997	0.300159	21.118	36.383	0.21	5.24	0.36	1.57
Atlantic Meridional Transect Project (AMT 4)i	-0.12933	-26.4698	South Atlantic Ocean	81.3	epipelagic	387374	7.74747	63963.3	2.29891	451337	10.0464	0.165121	0.296731	22.18	36.493	0.28	2.74	0.26	1.19
Atlantic Meridional Transect Project (AMT 4)i	-0.12933	-26.4698	South Atlantic Ocean	71.8	epipelagic	518345	10.3669	85180.1	3.10602	603525	13.4729	0.164331	0.29961	23.097	36.564	0.26	1.59	0.18	1.05
Atlantic Meridional Transect Project (AMT 4)i	-0.12933	-26.4698	South Atlantic Ocean	61.7	epipelagic	524837	10.4967	104245	4.10971	629082	14.6064	0.198623	0.391522	25.389	36.531	0.05	0.07	0.09	0.79
Atlantic Meridional Transect Project (AMT 4)i	-0.12933	-26.4698	South Atlantic Ocean	52.7	epipelagic	529362	10.5872	166332	7.17093	695695	17.7582	0.314212	0.677318	26.427	36.326	0.01	0	0.04	0.74
Atlantic Meridional Transect Project (AMT 4)i	-0.12933	-26.4698	South Atlantic Ocean	42.5	epipelagic	551905	11.0381	188120	7.93295	740025	18.9711	0.340856	0.718688	26.729	36.27	0.01	0	0.04	0.74
Atlantic Meridional Transect Project (AMT 4)i	-0.12933	-26.4698	South Atlantic Ocean	23	epipelagic	557872	11.1574	199272	8.1123	757144	19.2697	0.3572	0.727075	27.009	36.232	0.01	0	0.04	0.74
Atlantic Meridional Transect Project (AMT 4)i	-0.12933	-26.4698	South Atlantic Ocean	10.5	epipelagic	541131	10.8226	189537	7.52402	730668	18.3466	0.35026	0.695212	27.012	36.231	0.01	0	0.04	0.74
Atlantic Meridional Transect Project (AMT 4)i	1.8985	-25.6283	North Atlantic Ocean	97.6	epipelagic	151241	3.02482	10167	0.371859	161408	3.39668	0.0672238	0.122936	24.863	35.92	0.03	18.3	1.31	5.69
Atlantic Meridional Transect Project (AMT 4)i	1.8985	-25.6283	North Atlantic Ocean	89.1	epipelagic	166567	3.33135	13638.1	0.492567	180206	3.82392	0.0818776	0.147858	20.449	35.849	0.03	18.5	1.31	5.58
Atlantic Meridional Transect Project (AMT 4)i	1.8985	-25.6283	North Atlantic Ocean	79.7	epipelagic	176951	3.53902	22412.7	0.793771	199364	4.33279	0.12666	0.224291	18.123	35.727	0.06	18.59	1.3	5.35
Atlantic Meridional Transect Project (AMT 4)i	1.8985	-25.6283	North Atlantic Ocean	70.7	epipelagic	282712	5.65424	28045.8	0.957449	310758	6.61169	0.0992027	0.169333	16.203	35.624	0.16	17.83	1.2	4.85
Atlantic Meridional Transect Project (AMT 4)i	1.8985	-25.6283	North Atlantic Ocean	60.8	epipelagic	529103	10.5821	66621.7	2.24521	595724	12.8273	0.125914	0.212172	15.232	35.544	0.21	12.64	0.8	3.41
Atlantic Meridional Transect Project (AMT 4)i	1.8985	-25.6283	North Atlantic Ocean	50.5	epipelagic	692264	13.8453	85186.7	2.78264	777450	16.6279	0.123055	0.200981	14.871	35.51	0.14	7.31	0.5	2.63
Atlantic Meridional Transect Project (AMT 4)i	1.8985	-25.6283	North Atlantic Ocean	40.5	epipelagic	626688	12.5338	184351	7.62196	811038	20.1557	0.294167	0.608115	14.292	35.447	0.02	0.32	0.06	0.99
Atlantic Meridional Transect Project (AMT 4)i	1.8985	-25.6283	North Atlantic Ocean	8.4	surface	616079	12.3216	202125	8.23016	818205	20.5517	0.328083	0.667946	13.336	35.319	0.01	0	0	0.68
Atlantic Meridional Transect Project (AMT 4)i	6.0823	-23.6347	North Atlantic Ocean	79.7	epipelagic	180653	3.61306	14577.6	3.60298	195231	7.21605	0.0806936	0.997211	18.663	35.853	0.08	16.44	1.23	5.37
Atlantic Meridional Transect Project (AMT 4)i	6.0823	-23.6347	North Atlantic Ocean	69.5	epipelagic	270591	5.41182	17632.3	4.22783	288223	9.63965	0.0651622	0.781221	20.599	35.898	0.49	9.58	0.65	3.43
Atlantic Meridional Transect Project (AMT 4)i	6.0823	-23.6347	North Atlantic Ocean	59.7	epipelagic	440916	8.81833	24071.6	5.60018	464988	14.4185	0.0545945	0.635061	23.78	35.997	0.04	0.28	0.15	2.06
Atlantic Meridional Transect Project (AMT 4)i	6.0823	-23.6347	North Atlantic Ocean	50.4	epipelagic	606836	12.1367	29991.2	6.75363	636828	18.8904	0.0494223	0.556462	26.732	36.112	0.02	0	0.03	1.48
Atlantic Meridional Transect Project (AMT 4)i	6.0823	-23.6347	North Atlantic Ocean	39.2	epipelagic	614914	12.2983	52573.8	12.5389	667488	24.8372	0.0854978	1.01956	26.999	36.133	0.02	0	0	0.78
Atlantic Meridional Transect Project (AMT 4)i	6.0823	-23.6347	North Atlantic Ocean	29.4	epipelagic	643709	12.8742	125368	30.1053	769077	42.9795	0.194759	2.33843	27.297	36.075	0.01	0	0	0.89
Atlantic Meridional Transect Project (AMT 4)i	6.0823	-23.6347	North Atlantic Ocean	19.2	epipelagic	623234	12.4647	170055	40.3588	793289	52.8235	0.272859	3.23785	27.334	35.657	0.01	0	0	0.89
Atlantic Meridional Transect Project (AMT 4)i	6.0823	-23.6347	North Atlantic Ocean	13.9	surface	575691	11.5138	165725	39.166	741415	50.6799	0.287871	3.40166	27.401	35.49	0.01	0	0	0.89
Atlantic Meridional Transect Project (AMT 4)i	6.0823	-23.6347	North Atlantic Ocean	6.6	epipelagic	559309	11.1862	150166	31.7054	709474	42.8916	0.268485	2.83434	12.043	35.193	0.02	21.32	1.65	7.44
Atlantic Meridional Transect Project (AMT 4)i	10.0553	-21.9323	North Atlantic Ocean	101	epipelagic	191257	3.82515	8348.11	0.370654	199606	4.1958	0.0436486	0.0968992	14.057	35.431	0.05	20.71	1.52	7.08
Atlantic Meridional Transect Project (AMT 4)i	10.0553	-21.9323	North Atlantic Ocean	81.5	epipelagic	226006	4.52012	15606.9	0.63966	241613	5.15978	0.0690553	0.141514	14.655	35.491	0.14	20.28	1.48	6.41
Atlantic Meridional Transect Project (AMT 4)i	10.0553	-21.9323	North Atlantic Ocean	71.6	epipelagic	372426	7.44851	27389.5	1.32277	399815	8.77128	0.0735437	0.177588	15.05	35.535	0.22	18.15	1.44	5.84
Atlantic Meridional Transect Project (AMT 4)i	10.0553	-21.9323	North Atlantic Ocean	61.3	epipelagic	566840	11.3368	49555.7	3.37662	616396	14.7134	0.0874245	0.297846	15.992	35.61	0.37	6.17	1.22	4.55
Atlantic Meridional Transect Project (AMT 4)i	10.0553	-21.9323	North Atlantic Ocean	50.8	epipelagic	878731	17.5746	103016	9.06567	981747	26.6403	0.117232	0.515839	18.046	35.674	0.23	0	0.71	2.82
Atlantic Meridional Transect Project (AMT 4)i	10.0553	-21.9323	North Atlantic Ocean	40.2	epipelagic	1.01898e+06	20.3796	183335	11.9561	1.20231e+06	32.3357	0.179921	0.586672	20.537	35.851	0.01	0	0.07	0.68
Atlantic Meridional Transect Project (AMT 4)i	10.0553	-21.9323	North Atlantic Ocean	31.7	epipelagic	653567	13.0713	165788	7.32869	819355	20.4	0.253666	0.560669	26.376	36.105	0.01	0	0	0.57
Atlantic Meridional Transect Project (AMT 4)i	10.0553	-21.9323	North Atlantic Ocean	20.4	epipelagic	634588	12.6918	174992	7.83375	809580	20.5255	0.275756	0.617231	26.656	36.118	0.01	0	0	0.52
Atlantic Meridional Transect Project (AMT 4)i	10.0553	-21.9323	North Atlantic Ocean	8.3	surface	576271	11.5254	169749	8.23408	746020	19.7595	0.294564	0.714428	26.961	36.145	0.01	0	0	0.52
Atlantic Meridional Transect Project (AMT 4)i	10.0553	-21.9323	North Atlantic Ocean	2.9	surface	573840	11.4768	179931	8.48538	753770	19.9622	0.313556	0.739351	27.306	36.151	0.01	0	0	0.52
Atlantic Meridional Transect Project (AMT 4)i	13.7987	-21.0082	North Atlantic Ocean	3.9	surface	760202	15.204	161419	9.3264	921621	24.5304	0.212337	0.613416	24.484	36.067	0.01	0.02	0.09	0.39
Atlantic Meridional Transect Project (AMT 4)i	13.7987	-21.0082	North Atlantic Ocean	8.4	surface	749428	14.9886	131403	7.233	880831	22.2216	0.175337	0.482568	24.554	36.07	0.01	0.02	0.11	0.44
Atlantic Meridional Transect Project (AMT 4)i	13.7987	-21.0082	North Atlantic Ocean	16.4	epipelagic	697354	13.9471	140884	7.25792	838238	21.205	0.202026	0.52039	23.872	36.079	0.01	0.02	0.11	0.57
Atlantic Meridional Transect Project (AMT 4)i	13.7987	-21.0082	North Atlantic Ocean	21.1	epipelagic	713128	14.2626	180542	15.9541	893670	30.2167	0.253169	1.1186	23.389	36.046	0.01	0.02	0.13	0
Atlantic Meridional Transect Project (AMT 4)i	13.7987	-21.0082	North Atlantic Ocean	25.8	epipelagic	689312	13.7862	164481	13.7836	853793	27.5698	0.238615	0.999804	22.542	35.984	0.02	0.02	0.13	0.7
Atlantic Meridional Transect Project (AMT 4)i	13.7987	-21.0082	North Atlantic Ocean	30.6	epipelagic	787979	15.7596	59669.4	9.52212	847649	25.2817	0.0757245	0.604212	21.038	35.824	0.82	4.39	0.43	1.54
Atlantic Meridional Transect Project (AMT 4)i	13.7987	-21.0082	North Atlantic Ocean	40.6	epipelagic	710931	14.2186	13335	1.77487	724266	15.9935	0.0187571	0.124827	19.15	35.864	0.95	13.62	0.96	3.02
Atlantic Meridional Transect Project (AMT 4)i	13.7987	-21.0082	North Atlantic Ocean	50.6	epipelagic	629020	12.5804	3321.26	0.350706	632342	12.9311	0.00528005	0.0278772	17.614	35.794	0.08	17.54	1.26	4.36
Atlantic Meridional Transect Project (AMT 4)i	13.7987	-21.0082	North Atlantic Ocean	70.4	epipelagic	327632	6.55265	4941.91	0.269951	332574	6.8226	0.0150837	0.0411973	15.895	35.605	0.04	19.75	1.56	6.32
Atlantic Meridional Transect Project (AMT 4)i	13.7987	-21.0082	North Atlantic Ocean	100.1	epipelagic	168776	3.37553	4189.88	0.192317	172966	3.56784	0.0248251	0.0569741	15.042	35.604	0.03	19.95	1.59	7.1
Atlantic Meridional Transect Project (AMT 4)i	17.7888	-21.2207	North Atlantic Ocean	6.6	surface	396442	7.92883	253391	9.93008	649832	17.8589	0.639162	1.2524	23.351	36.503	-0.01	0	0.08	0.48
Atlantic Meridional Transect Project (AMT 4)i	17.7888	-21.2207	North Atlantic Ocean	21.9	epipelagic	398030	7.9606	248440	9.60545	646470	17.5661	0.624173	1.20662	23.351	36.5	-0.01	0	0.08	0.48
Atlantic Meridional Transect Project (AMT 4)i	17.7888	-21.2207	North Atlantic Ocean	31.9	epipelagic	395489	7.90977	262389	10.5993	657878	18.5091	0.663456	1.34003	23.346	36.502	-0.01	0	0.08	0.48
Atlantic Meridional Transect Project (AMT 4)i	17.7888	-21.2207	North Atlantic Ocean	42.5	epipelagic	468724	9.37448	289620	12.0865	758344	21.461	0.617889	1.2893	22.971	36.513	0	0	0.09	0.56
Atlantic Meridional Transect Project (AMT 4)i	17.7888	-21.2207	North Atlantic Ocean	52.2	epipelagic	552125	11.0425	168311	6.70213	720436	17.7446	0.304843	0.606939	20.417	36.337	0.16	6.69	0.56	2.19
Atlantic Meridional Transect Project (AMT 4)i	17.7888	-21.2207	North Atlantic Ocean	61.6	epipelagic	284753	5.69506	51880.9	1.86741	336634	7.56246	0.182196	0.3279	18.664	36.196	0.14	14.51	0.98	3.39
Atlantic Meridional Transect Project (AMT 4)i	17.7888	-21.2207	North Atlantic Ocean	81.9	epipelagic	184394	3.68789	22642.5	0.83061	207037	4.5185	0.122794	0.225226	17.502	36.059	0.08	17.12	1.21	4.38
Atlantic Meridional Transect Project (AMT 4)i	17.7888	-21.2207	North Atlantic Ocean	91.7	epipelagic	184329	3.68658	13544.9	0.495787	197874	4.18237	0.0734819	0.134484	16.77	35.936	0.03	18	1.33	4.75
Atlantic Meridional Transect Project (AMT 4)i	17.7888	-21.2207	North Atlantic Ocean	101.5	epipelagic	163913	3.27826	7162.19	0.272145	171075	3.55041	0.043695	0.0830149	16.152	35.911	0.02	18.36	1.36	5.22
Atlantic Meridional Transect Project (AMT 4)i	22.165	-21.5632	North Atlantic Ocean	8.6	surface	832305	16.6461	415538	17.1798	1.24784e+06	33.8259	0.499262	1.03206	13.636	35.689	-0.01	18.92	1.36	6.88
Atlantic Meridional Transect Project (AMT 4)i	22.165	-21.5632	North Atlantic Ocean	17.1	epipelagic	893358	17.8672	551550	22.9406	1.44491e+06	40.8078	0.617389	1.28395	22.312	36.532	0	0	0.05	0.32
Atlantic Meridional Transect Project (AMT 4)i	22.165	-21.5632	North Atlantic Ocean	21.6	epipelagic	869600	17.392	536346	22.582	1.40595e+06	39.974	0.616774	1.29841	22.307	36.532	0	0	0.05	0.32
Atlantic Meridional Transect Project (AMT 4)i	22.165	-21.5632	North Atlantic Ocean	31.5	epipelagic	546186	10.9237	199300	14.7358	745487	25.6595	0.364894	1.34897	22.305	36.532	0	0	0.05	0.32
Atlantic Meridional Transect Project (AMT 4)i	22.165	-21.5632	North Atlantic Ocean	41.3	epipelagic	490815	9.81629	133843	9.32811	624658	19.1444	0.272696	0.950268	22.299	36.534	0.04	0	0.05	0.56
Atlantic Meridional Transect Project (AMT 4)i	22.165	-21.5632	North Atlantic Ocean	51.7	epipelagic	445195	8.90391	89157.6	6.67659	534353	15.5805	0.200266	0.749849	21.289	36.703	0.01	0	0.05	0.5
Atlantic Meridional Transect Project (AMT 4)i	22.165	-21.5632	North Atlantic Ocean	62.2	epipelagic	429888	8.59776	45028.5	3.59603	474917	12.1938	0.104745	0.418252	21.338	36.809	0.18	1.08	0.12	0.7
Atlantic Meridional Transect Project (AMT 4)i	22.165	-21.5632	North Atlantic Ocean	71.8	epipelagic	340416	6.80831	28309	2.1141	368725	8.92242	0.08316	0.310518	20.915	36.737	0.26	2.39	0.21	0.86
Atlantic Meridional Transect Project (AMT 4)i	22.165	-21.5632	North Atlantic Ocean	81.4	epipelagic	300194	6.00388	12642.1	0.960563	312836	6.96444	0.0421131	0.15999	20.365	36.722	0.09	6.58	0.41	1.48
Atlantic Meridional Transect Project (AMT 4)i	22.165	-21.5632	North Atlantic Ocean	101.1	epipelagic	192622	3.85245	772.85	0.118298	193395	3.97074	0.00401226	0.0307073	19.84	36.6	0.05	9.2	0.54	2.02
Atlantic Meridional Transect Project (AMT 4)i	26.2803	-21.8843	North Atlantic Ocean	91.9	epipelagic	261090	5.2218	155496	6.20578	416585	11.4276	0.595563	1.18844	20.332	37.096	0.01	0	0	0.33
Atlantic Meridional Transect Project (AMT 4)i	26.2803	-21.8843	North Atlantic Ocean	82.4	epipelagic	287141	5.74282	178080	7.18561	465221	12.9284	0.620184	1.25123	20.481	37.106	0	0	0	0.33
Atlantic Meridional Transect Project (AMT 4)i	26.2803	-21.8843	North Atlantic Ocean	72.6	epipelagic	293937	5.87874	176285	7.12356	470222	13.0023	0.599738	1.21175	20.583	37.109	0	0	0	0.33
Atlantic Meridional Transect Project (AMT 4)i	26.2803	-21.8843	North Atlantic Ocean	62.8	epipelagic	318689	6.37379	173774	7.09915	492463	13.4729	0.545276	1.1138	20.853	37.132	0	0	0	0.33
Atlantic Meridional Transect Project (AMT 4)i	26.2803	-21.8843	North Atlantic Ocean	52.4	epipelagic	312114	6.24229	168732	7.01024	480847	13.2525	0.54061	1.12302	21.407	37.164	0	0	0	0.33
Atlantic Meridional Transect Project (AMT 4)i	26.2803	-21.8843	North Atlantic Ocean	42.6	epipelagic	336314	6.72629	215122	8.59726	551437	15.3235	0.639646	1.27816	21.997	37.14	0	0	0	0.33
Atlantic Meridional Transect Project (AMT 4)i	26.2803	-21.8843	North Atlantic Ocean	32.3	epipelagic	330679	6.61358	221639	8.87953	552318	15.4931	0.670254	1.34262	22.005	37.137	0	0	0	0.33
Atlantic Meridional Transect Project (AMT 4)i	26.2803	-21.8843	North Atlantic Ocean	22.6	epipelagic	311700	6.234	232705	9.19114	544406	15.4251	0.746569	1.47436	22.013	37.137	0	0	0	0.33
Atlantic Meridional Transect Project (AMT 4)i	26.2803	-21.8843	North Atlantic Ocean	6.9	surface	349823	6.99647	232751	9.08086	582574	16.0773	0.665337	1.29792	22.107	37.141	0	0	0	0.33
Atlantic Meridional Transect Project (AMT 4)i	30.0485	-21.757	North Atlantic Ocean	8.2	surface	296865	5.9373	86724.9	3.5578	383590	9.4951	0.292136	0.599229	20.766	36.986	0.01	0	0	-0.61
Atlantic Meridional Transect Project (AMT 4)i	30.0485	-21.757	North Atlantic Ocean	20.8	epipelagic	282666	5.65331	96117.8	3.89948	378783	9.55279	0.340041	0.68977	20.739	36.988	0.01	0	0	-0.61
Atlantic Meridional Transect Project (AMT 4)i	30.0485	-21.757	North Atlantic Ocean	30	epipelagic	319601	6.39202	100986	4.12546	420587	10.5175	0.315976	0.645407	20.501	36.973	0.01	0	0	-0.61
Atlantic Meridional Transect Project (AMT 4)i	30.0485	-21.757	North Atlantic Ocean	40.3	epipelagic	369244	7.38488	129271	5.49402	498516	12.8789	0.350097	0.743955	20.168	36.931	0.01	0	-0.13	-0.61
Atlantic Meridional Transect Project (AMT 4)i	30.0485	-21.757	North Atlantic Ocean	50.9	epipelagic	380184	7.60368	146539	6.17873	526723	13.7824	0.385443	0.812597	19.893	36.901	0.01	0	-0.13	-0.61
Atlantic Meridional Transect Project (AMT 4)i	30.0485	-21.757	North Atlantic Ocean	70.1	epipelagic	345901	6.91801	117192	5.03721	463092	11.9552	0.338801	0.728129	19.533	36.938	0.01	0	-0.13	-0.61
Atlantic Meridional Transect Project (AMT 4)i	30.0485	-21.757	North Atlantic Ocean	90.2	epipelagic	340624	6.81248	154204	6.29657	494828	13.1091	0.45271	0.92427	19.073	36.879	0.01	0	-0.13	-0.61
Atlantic Meridional Transect Project (AMT 4)i	39.8675	-20.0077	North Atlantic Ocean	4.7	surface	322225	6.44451	170067	7.1778	492293	13.6223	0.52779	1.11378	17.064	36.07	0	0	0.04	0.53
Atlantic Meridional Transect Project (AMT 4)i	39.8675	-20.0077	North Atlantic Ocean	21.2	epipelagic	338856	6.77712	170019	7.15248	508875	13.9296	0.501744	1.05539	16.938	36.067	0	0	0.04	0.53
Atlantic Meridional Transect Project (AMT 4)i	39.8675	-20.0077	North Atlantic Ocean	40.4	epipelagic	334104	6.68209	172667	8.1146	506771	14.7967	0.516806	1.21438	16.93	36.068	0	0	0.04	0.53
Atlantic Meridional Transect Project (AMT 4)i	39.8675	-20.0077	North Atlantic Ocean	51.5	epipelagic	596272	11.9254	205372	14.8205	801644	26.746	0.344427	1.24277	16.311	36.053	0	0.01	0.04	0.53
Atlantic Meridional Transect Project (AMT 4)i	39.8675	-20.0077	North Atlantic Ocean	60.7	epipelagic	624451	12.489	138890	14.3466	763340	26.8356	0.222419	1.14874	15.311	36.052	0.01	1.26	0.04	0.63
Atlantic Meridional Transect Project (AMT 4)i	39.8675	-20.0077	North Atlantic Ocean	71	epipelagic	361087	7.22174	30437.6	3.09782	391525	10.3196	0.0842945	0.428958	15.189	36.052	0.13	3.45	0.1	0.75
Atlantic Meridional Transect Project (AMT 4)i	39.8675	-20.0077	North Atlantic Ocean	81.7	epipelagic	263355	5.2671	6545.91	0.611823	269901	5.87892	0.0248558	0.116159	15.124	36.057	0.07	4.37	0.21	0.89
Atlantic Meridional Transect Project (AMT 4)i	39.8675	-20.0077	North Atlantic Ocean	90.7	epipelagic	231633	4.63266	4020.82	0.259831	235654	4.89249	0.0173586	0.0560868	14.911	36.024	0.03	5.05	0.26	1.09
Atlantic Meridional Transect Project (AMT 4)i	39.8675	-20.0077	North Atlantic Ocean	101.3	epipelagic	238237	4.76473	7648.55	0.44162	245885	5.20636	0.0321048	0.0926852	14.765	36.009	0.03	5.69	0.34	1.24
Atlantic Meridional Transect Project (AMT 4)i	43.967	-19.9718	North Atlantic Ocean	101.7	epipelagic	285172	5.70344	1111.8	0.193739	286284	5.89717	0.00389872	0.0339688	12.749	35.742	0.03	9.41	0.39	2.19
Atlantic Meridional Transect Project (AMT 4)i	43.967	-19.9718	North Atlantic Ocean	91.2	epipelagic	304580	6.0916	1094.32	0.18608	305674	6.27768	0.00359287	0.0305469	12.875	35.749	0.02	8.77	0.35	1.99
Atlantic Meridional Transect Project (AMT 4)i	43.967	-19.9718	North Atlantic Ocean	70.8	epipelagic	376796	7.53592	1716.43	0.280273	378512	7.81619	0.00455532	0.0371917	12.908	35.753	0.03	8.6	0.34	1.93
Atlantic Meridional Transect Project (AMT 4)i	43.967	-19.9718	North Atlantic Ocean	51.8	epipelagic	465579	9.31158	4357.28	0.830634	469936	10.1422	0.00935883	0.0892044	13.083	35.771	0.03	8.26	0.36	1.82
Atlantic Meridional Transect Project (AMT 4)i	43.967	-19.9718	North Atlantic Ocean	36.9	epipelagic	1.30059e+06	26.0117	399665	34.3044	1.70025e+06	60.3161	0.307295	1.3188	13.654	35.821	0.15	6.65	0.26	1.41
Atlantic Meridional Transect Project (AMT 4)i	43.967	-19.9718	North Atlantic Ocean	26.7	epipelagic	1.21377e+06	24.2755	436591	37.3601	1.65036e+06	61.6356	0.359697	1.53901	15.156	35.821	0.03	0.06	0.04	0.5
Atlantic Meridional Transect Project (AMT 4)i	43.967	-19.9718	North Atlantic Ocean	5.7	epipelagic	1.20216e+06	24.0431	410399	47.3365	1.61256e+06	71.3797	0.341386	1.96882	15.309	35.841	0.01	0	0	0.5
Atlantic Meridional Transect Project (AMT 4)i	43.967	-19.9718	North Atlantic Ocean	17	epipelagic	1.19774e+06	23.9547	422686	36.5155	1.62042e+06	60.4703	0.352904	1.52436	15.536	35.864	0.01	0	0	0.5
Atlantic Meridional Transect Project (AMT 4)i	47.0055	-20.0048	North Atlantic Ocean	3.8	surface	667919	13.3584	25254.2	5.18697	693173	18.5454	0.0378103	0.388293	15.574	35.862	0.01	0	0.03	0.5
Atlantic Meridional Transect Project (AMT 4)i	47.0055	-20.0048	North Atlantic Ocean	9.7	surface	673314	13.4663	23906.7	4.92702	697221	18.3933	0.0355061	0.365879	14.121	35.673	0.06	0.89	0.08	0.04
Atlantic Meridional Transect Project (AMT 4)i	47.0055	-20.0048	North Atlantic Ocean	16.3	surface	656132	13.1226	22979	4.71862	679111	17.8413	0.0350219	0.359578	14.125	35.67	0.08	1.05	0.08	0.04
Atlantic Meridional Transect Project (AMT 4)i	47.0055	-20.0048	North Atlantic Ocean	26.2	epipelagic	610983	12.2197	13365	2.83756	624348	15.0572	0.0218745	0.232212	14.088	35.685	0.09	1.39	0.11	0.04
Atlantic Meridional Transect Project (AMT 4)i	47.0055	-20.0048	North Atlantic Ocean	41.5	epipelagic	546447	10.9289	8937.75	2.00753	555384	12.9365	0.0163561	0.18369	13.755	35.709	0.13	2.73	0.21	0.17
Atlantic Meridional Transect Project (AMT 4)i	47.0055	-20.0048	North Atlantic Ocean	61.7	epipelagic	519753	10.3951	9574.01	2.29002	529327	12.6851	0.0184203	0.220299	13.28	35.714	0.21	3.63	0.27	0.46
Atlantic Meridional Transect Project (AMT 4)i	47.0055	-20.0048	North Atlantic Ocean	82	epipelagic	415683	8.31365	2085.36	0.479635	417768	8.79329	0.00501672	0.0576925	12.952	35.701	0.23	5.66	0.3	1.25
Atlantic Meridional Transect Project (AMT 4)i	48.0587	-13.9825	North Atlantic Ocean	9.4	surface	716879	14.3376	25116	4.99658	741995	19.3342	0.0350352	0.348496	13.5	35.568	0.07	0.91	0.17	0.07
Atlantic Meridional Transect Project (AMT 4)i	48.0587	-13.9825	North Atlantic Ocean	3.6	surface	773457	15.4691	26200.3	5.19447	799657	20.6636	0.0338743	0.335795	13.47	35.571	0.04	1.04	0.19	-0.1
Atlantic Meridional Transect Project (AMT 4)i	48.0587	-13.9825	North Atlantic Ocean	23.3	epipelagic	544128	10.8826	18851.5	3.91207	562979	14.7946	0.0346455	0.359481	13.23	35.57	0.09	3.08	0.23	-0.1
Atlantic Meridional Transect Project (AMT 4)i	48.0587	-13.9825	North Atlantic Ocean	42.4	epipelagic	587060	11.7412	8234.85	1.7955	595295	13.5367	0.0140273	0.152923	12.315	35.628	0.23	7.11	0.46	0.23
Atlantic Meridional Transect Project (AMT 4)i	48.0587	-13.9825	North Atlantic Ocean	62	epipelagic	549032	10.9807	3011.45	0.607319	552044	11.588	0.00548501	0.0553081	12.157	35.619	0.27	7.65	0.79	1.06
Atlantic Meridional Transect Project (AMT 4)i	48.0587	-13.9825	North Atlantic Ocean	82	epipelagic	510862	10.2172	1678.95	0.329754	512541	10.547	0.0032865	0.0322742	12.063	35.608	0.28	7.98	0.92	1.16
Atlantic Meridional Transect Project (AMT 4)i	48.9542	-8.773	North Atlantic Ocean	3	surface	594550	11.891	4760.36	0.330167	599311	12.2212	0.00800665	0.0277661	12.776	35.541	0.01	0.11	0	0.07
Atlantic Meridional Transect Project (AMT 4)i	48.9542	-8.773	North Atlantic Ocean	7.1	surface	603844	12.0769	4906.93	0.326062	608751	12.4029	0.00812616	0.0269989	12.782	35.544	0.01	0.11	0	0.07
Atlantic Meridional Transect Project (AMT 4)i	48.9542	-8.773	North Atlantic Ocean	19.7	epipelagic	591861	11.8372	3814.28	0.309218	595675	12.1464	0.00644456	0.0261225	12.755	35.544	0.02	0.6	0	0.07
Atlantic Meridional Transect Project (AMT 4)i	48.9542	-8.773	North Atlantic Ocean	29.7	epipelagic	473833	9.47667	1405.79	0.250007	475239	9.72667	0.00296684	0.0263814	12.263	35.564	0.1	2.06	0.13	0.48
Atlantic Meridional Transect Project (AMT 4)i	48.9542	-8.773	North Atlantic Ocean	39	epipelagic	483780	9.67561	1264.21	0.255527	485045	9.93113	0.00261319	0.0264094	11.878	35.562	0.11	2.77	0.21	0.82
Atlantic Meridional Transect Project (AMT 4)i	48.9542	-8.773	North Atlantic Ocean	50.4	epipelagic	423896	8.47793	1165.94	0.264521	425062	8.74245	0.00275052	0.0312012	11.204	35.544	0.12	6.45	0.34	2.05
Atlantic Meridional Transect Project (AMT 4)i	48.9542	-8.773	North Atlantic Ocean	59.9	epipelagic	417198	8.34396	916.094	0.205015	418114	8.54898	0.00219582	0.0245705	10.92	35.544	0.1	8.06	0.42	2.56
Atlantic Meridional Transect Project (AMT 4)i	48.9542	-8.773	North Atlantic Ocean	79	epipelagic	437819	8.75637	919.425	0.21091	438738	8.96728	0.00210001	0.0240864	10.902	35.543	0.06	8.1	0.42	2.65
Atlantic Meridional Transect Project (AMT 4)i	48.9542	-8.773	North Atlantic Ocean	98.6	epipelagic	437694	8.75389	849.469	0.191389	438544	8.94528	0.00194078	0.0218634	10.902	35.544	0.06	10.17	0.47	2.65
Atlantic Meridional Transect Project (AMT 6)i	-33.624	18.006	South Atlantic Ocean	100.7	epipelagic	567317	11.3463	682.731	0.159326	568000	11.5057	0.00120344	0.014042	9.62	34.894	32.97	0.01	2.11	0.621135
Atlantic Meridional Transect Project (AMT 6)i	-33.624	18.006	South Atlantic Ocean	80.8	epipelagic	470544	9.41088	728.776	0.170001	471273	9.58088	0.00154879	0.0180643	9.991	34.939	32.13	0.01	1.93	-
Atlantic Meridional Transect Project (AMT 6)i	-33.624	18.006	South Atlantic Ocean	41.6	epipelagic	540328	10.8066	944.603	0.176965	541273	10.9835	0.0017482	0.0163757	11.323	35.041	33.05	0.01	2.14	1.80563
Atlantic Meridional Transect Project (AMT 6)i	-33.624	18.006	South Atlantic Ocean	21.8	epipelagic	694888	13.8978	4566.99	0.911111	699455	14.8089	0.00657227	0.0655581	12.471	35.087	26.61	0.09	1.28	3.13456
Atlantic Meridional Transect Project (AMT 6)i	-33.624	18.006	South Atlantic Ocean	11.6	epipelagic	1.73897e+06	34.7795	143118	30.2982	1.88209e+06	65.0776	0.0823002	0.871152	13.847	35.12	24.06	0.06	1.29	3.4668
Atlantic Meridional Transect Project (AMT 6)i	-32.24	17.877	South Atlantic Ocean	80.8	epipelagic	485649	9.71299	896.022	0.197645	486545	9.91063	0.001845	0.0203485	15.526	35.146	-	-	-	-
Atlantic Meridional Transect Project (AMT 6)i	-32.24	17.877	South Atlantic Ocean	21.8	epipelagic	1.04705e+06	20.941	36129.6	7.47462	1.08318e+06	28.4157	0.0345061	0.356936	9.792	34.915	-	-	-	-
Atlantic Meridional Transect Project (AMT 6)i	-32.24	17.877	South Atlantic Ocean	17	epipelagic	1.34892e+06	26.9783	39900.7	8.40316	1.38882e+06	35.3815	0.0295798	0.311478	15.872	35.175	-	-	-	-
Atlantic Meridional Transect Project (AMT 6)i	-32.24	17.877	South Atlantic Ocean	9.1	epipelagic	1.35381e+06	27.0761	43285.3	8.66381	1.39709e+06	35.7399	0.0319731	0.31998	16.283	35.197	-	-	-	-
Atlantic Meridional Transect Project (AMT 6)i	-32.24	17.877	South Atlantic Ocean	4.3	epipelagic	1.44925e+06	28.985	48475.8	9.63352	1.49773e+06	38.6185	0.0334488	0.332362	16.348	35.201	-	-	-	-
Atlantic Meridional Transect Project (AMT 6)i	-29.522	16.453	South Atlantic Ocean	41.6	surface	1.16282e+06	23.2564	1362.31	0.226975	1.16418e+06	23.4834	0.00117155	0.00975969	16.358	35.202	-	-	-	-
Atlantic Meridional Transect Project (AMT 6)i	-29.522	16.453	South Atlantic Ocean	21.8	surface	2260891	45.2178	59381.7	10.7142	2.32027e+06	55.932	0.0262647	0.236947	16.347	35.201	-	-	-	-
Atlantic Meridional Transect Project (AMT 6)i	-26.698	14.245	South Atlantic Ocean	21.6	epipelagic	1.89511e+06	37.9023	84387.5	19.0247	1.9795e+06	56.9269	0.044529	0.501941	9.367	34.869	28.52	0.05	2.17	-
Atlantic Meridional Transect Project (AMT 6)i	-26.698	14.245	South Atlantic Ocean	9.1	epipelagic	1.94794e+06	38.9588	81148.5	18.9531	2.02909e+06	57.9119	0.0416586	0.48649	10.75	34.99	27.56	0.06	1.98	-
Atlantic Meridional Transect Project (AMT 6)i	-28.929	16.187	South Atlantic Ocean	62	epipelagic	702709	14.0542	563.868	0.121509	703273	14.1757	0.00080242	0.00864577	11.783	35.02	28.51	0.04	2.15	-
Atlantic Meridional Transect Project (AMT 6)i	-28.929	16.187	South Atlantic Ocean	19.4	epipelagic	1.70819e+06	34.1639	85261.7	18.2419	1.79345e+06	52.4058	0.0499134	0.533954	12.783	35.001	14.78	0.28	1.14	-
Atlantic Meridional Transect Project (AMT 6)i	-28.929	16.187	South Atlantic Ocean	9.1	epipelagic	2.17353e+06	43.4706	151650	32.2549	2.32518e+06	75.7256	0.0697714	0.741993	12.911	35.001	12.92	0.22	1	3.13456
Atlantic Meridional Transect Project (AMT 6)i	-24.75	14.324	South Atlantic Ocean	100.7	surface	3.11129e+06	62.2258	1255.63	0.124117	3.11255e+06	62.3499	0.000403573	0.00199462	13.277	35.002	10.79	0.14	0.85	-
Atlantic Meridional Transect Project (AMT 6)i	-24.75	14.324	South Atlantic Ocean	80.9	epipelagic	2.74204e+06	54.8408	1050.5	0.131968	2.74309e+06	54.9728	0.000383109	0.00240638	13.594	35.116	7.76	0.35	0.74	-
Atlantic Meridional Transect Project (AMT 6)i	-24.75	14.324	South Atlantic Ocean	46.7	epipelagic	2835381	56.7076	1800.7	0.24243	2.83718e+06	56.9501	0.000635083	0.00427509	15.004	35.042	4.96	0.13	0.44	-
Atlantic Meridional Transect Project (AMT 6)i	-24.75	14.324	South Atlantic Ocean	24.8	epipelagic	1.18467e+06	23.6933	3879.92	0.228242	1.18855e+06	23.9216	0.00327512	0.00963318	15.566	35.014	3.15	0.19	0.37	3.13456
Atlantic Meridional Transect Project (AMT 6)i	-24.75	14.324	South Atlantic Ocean	9.1	surface	1.09374e+06	21.8749	3075.04	0.119207	1.09682e+06	21.9941	0.00281148	0.0054495	16.139	35.065	1.79	0.16	0.28	-
Atlantic Meridional Transect Project (AMT 6)i	-24.75	14.324	South Atlantic Ocean	5.4	surface	1.63072e+06	32.6144	13188	0.490798	1.64391e+06	33.1052	0.0080872	0.0150485	16.453	35.075	0.32	0.03	0.17	-
Atlantic Meridional Transect Project (AMT 6)i	-21.652	12.404	South Atlantic Ocean	62	epipelagic	1.37552e+06	27.5104	4664.08	0.902142	1.38018e+06	28.4125	0.00339078	0.0327928	10.063	34.947	23.81	0.03	1.74	0.621135
Atlantic Meridional Transect Project (AMT 6)i	-21.652	12.404	South Atlantic Ocean	41.6	epipelagic	1705787	34.1157	28485.7	6.60651	1.73427e+06	40.7222	0.0166994	0.19365	12.582	35.014	27.35	0.04	2.27	-
Atlantic Meridional Transect Project (AMT 6)i	-21.652	12.404	South Atlantic Ocean	21.6	epipelagic	3.02336e+06	60.4673	164363	40.5287	3.18773e+06	100.996	0.0543643	0.670258	13.2	34.991	14.29	0.19	1.11	-
Atlantic Meridional Transect Project (AMT 6)i	-21.652	12.404	South Atlantic Ocean	9.1	epipelagic	2.78546e+06	55.7091	169272	41.8642	2.95473e+06	97.5733	0.06077	0.751478	13.256	34.975	12.55	0.16	0.98	3.13456
Atlantic Meridional Transect Project (AMT 6)i	-21.652	12.404	South Atlantic Ocean	4.5	surface	2.96223e+06	59.2447	179311	44.3882	3.14155e+06	103.633	0.0605322	0.749235	13.258	34.975	8.81	0.15	0.87	-
Atlantic Meridional Transect Project (AMT 6)i	-18.996	12	South Atlantic Ocean	102.1	epipelagic	757474	15.1495	616.717	0.101121	758091	15.2506	0.000814175	0.00667489	11.841	35.236	0.01	0.03	4.35	-
Atlantic Meridional Transect Project (AMT 6)i	-18.993	11.998	South Atlantic Ocean	31.8	epipelagic	1.14601e+06	22.9201	7267.16	1.40335	1.15327e+06	24.3235	0.00634129	0.0612278	11.976	35.198	0.01	0.05	4.12	0.621135
Atlantic Meridional Transect Project (AMT 6)i	-14.743	7.861	South Atlantic Ocean	81.9	epipelagic	258958	5.17916	5769.3	0.250352	264727	5.42951	0.0222789	0.0483383	12.324	35.17	11.43	0.43	3.06	-
Atlantic Meridional Transect Project (AMT 6)i	-14.743	7.861	South Atlantic Ocean	38.1	epipelagic	890849	17.817	126878	15.4726	1.01773e+06	33.2896	0.142424	0.868417	12.633	35.136	0.01	0.07	4.39	-
Atlantic Meridional Transect Project (AMT 6)i	-14.743	7.861	South Atlantic Ocean	15	epipelagic	869158	17.3832	179479	24.5568	1.04864e+06	41.94	0.206497	1.41268	12.806	35.137	12.17	0.34	1.25	-
Atlantic Meridional Transect Project (AMT 6)i	-14.743	7.861	South Atlantic Ocean	10.2	epipelagic	888071	17.7614	177020	24.8188	1.06509e+06	42.5802	0.199331	1.39734	12.923	35.141	10.26	0.3	1.02	3.13456
Atlantic Meridional Transect Project (AMT 6)i	-11.621	4.139	South Atlantic Ocean	2.3	epipelagic	460314	9.20628	239504	9.92903	699818	19.1353	0.520306	1.07851	13.038	35.149	9.91	0.29	0.98	-
Atlantic Meridional Transect Project (AMT 6)i	-11.621	4.139	South Atlantic Ocean	54	surface	664574	13.2915	130153	8.46964	794727	21.7611	0.195844	0.637223	13.164	35.157	12.34	0.32	-	-
Atlantic Meridional Transect Project (AMT 6)i	-11.621	4.139	South Atlantic Ocean	22.3	epipelagic	462113	9.24225	225433	9.31602	687545	18.5583	0.487831	1.00798	13.955	35.466	-	-	-	-
Atlantic Meridional Transect Project (AMT 6)i	-8.625	0.60533	South Atlantic Ocean	9.1	epipelagic	543689	10.8738	287947	13.0182	831636	23.892	0.529617	1.19721	15.871	35.506	-	-	-	-
Atlantic Meridional Transect Project (AMT 6)i	-8.622	0.5983	South Atlantic Ocean	67.3	epipelagic	256132	5.12263	26413.8	0.998059	282545	6.12069	0.103126	0.194833	16.69	35.443	-	-	-	-
Atlantic Meridional Transect Project (AMT 6)i	-8.622	0.5983	South Atlantic Ocean	45	epipelagic	579184	11.5837	210816	11.6334	790000	23.2171	0.363988	1.00429	16.972	35.429	-	-	-	-
Atlantic Meridional Transect Project (AMT 6)i	-8.622	0.5983	South Atlantic Ocean	29.8	surface	472434	9.44868	277384	11.5193	749818	20.968	0.587139	1.21914	17.07	35.43	-	-	-	-
Atlantic Meridional Transect Project (AMT 6)i	-5.8645	-2.6252	South Atlantic Ocean	8.6	surface	462283	9.24566	225535	13.4293	687818	22.675	0.487872	1.4525	17.08	35.43	-	-	-	-
Atlantic Meridional Transect Project (AMT 6)i	-5.8645	-2.6252	South Atlantic Ocean	2.1	epipelagic	455605	9.11211	216213	12.8933	671818	22.0054	0.474561	1.41496	13.483	35.476	31.01	2.96	2.16	-
Atlantic Meridional Transect Project (AMT 6)i	-5.8631	-2.6293	South Atlantic Ocean	51.2	epipelagic	377388	7.54775	59521.5	2.20063	436909	9.74838	0.15772	0.291561	15.142	35.628	29.8	0.11	1.66	3.13456
Atlantic Meridional Transect Project (AMT 6)i	-5.8631	-2.6293	South Atlantic Ocean	41.2	epipelagic	555230	11.1046	123042	7.18448	678273	18.2891	0.221606	0.646981	16.204	35.627	24.51	0.14	1.6	-
Atlantic Meridional Transect Project (AMT 6)i	-5.8631	-2.6293	South Atlantic Ocean	23.5	epipelagic	481059	9.62118	209941	12.5955	691000	22.2167	0.436414	1.30914	16.248	35.629	17.48	0.41	1.27	3.13456
Atlantic Meridional Transect Project (AMT 6)i	-2.8111	-6.1659	South Atlantic Ocean	9.1	surface	590719	11.8144	254099	13.4891	844818	25.3034	0.430152	1.14175	16.319	35.635	17.97	-	1.17	-
Atlantic Meridional Transect Project (AMT 6)i	-2.8111	-6.1659	South Atlantic Ocean	2.3	epipelagic	558510	11.1702	238581	12.7523	797091	23.9225	0.427173	1.14164	14.637	35.615	23.78	0.05	1.8	-
Atlantic Meridional Transect Project (AMT 6)i	-2.8106	-6.17	South Atlantic Ocean	57.2	epipelagic	328931	6.57862	62159.9	2.34119	391091	8.91981	0.188975	0.355879	22.116	36.183	0.59	0.04	0.22	-
Atlantic Meridional Transect Project (AMT 6)i	-2.8106	-6.17	South Atlantic Ocean	43.2	epipelagic	466237	9.32474	110399	5.60659	576636	14.9313	0.236788	0.601259	22.123	36.184	0.01	0.01	0.18	-
Atlantic Meridional Transect Project (AMT 6)i	-2.8106	-6.17	South Atlantic Ocean	15.9	epipelagic	552817	11.0563	236456	12.5846	789273	23.6409	0.427728	1.13822	22.134	36.184	0.01	0.01	0.18	-
Atlantic Meridional Transect Project (AMT 6)i	-2.85	-8.8582	South Atlantic Ocean	2.3	epipelagic	662268	13.2454	335187	22.7956	997454	36.0409	0.50612	1.72102	22.134	36.184	0.03	0.02	0.23	-
Atlantic Meridional Transect Project (AMT 6)i	3.0732	-12.7717	North Atlantic Ocean	9.1	surface	421028	8.42056	167154	7.82358	588182	16.2441	0.397014	0.929104	25.174	36.848	0.05	0.01	0.15	-
Atlantic Meridional Transect Project (AMT 6)i	3.0732	-12.7717	North Atlantic Ocean	91.7	surface	141426	2.82851	17938	0.631081	159364	3.45959	0.126837	0.223114	25.175	36.848	0.05	0.01	0.14	-
Atlantic Meridional Transect Project (AMT 6)i	3.0732	-12.7717	North Atlantic Ocean	62.2	epipelagic	182537	3.65074	15644.8	0.466437	198182	4.11718	0.0857075	0.127765	12.582	35.3	21.13	0.08	1.73	-
Atlantic Meridional Transect Project (AMT 6)i	3.0732	-12.7717	North Atlantic Ocean	57.4	epipelagic	181666	3.63332	15970.2	0.508143	197636	4.14147	0.0879095	0.139856	14.547	35.545	20.64	0.17	1.6	-
Atlantic Meridional Transect Project (AMT 6)i	5.8623	-16.0816	North Atlantic Ocean	9.1	epipelagic	403317	8.06634	181865	9.79937	585182	17.8657	0.450922	1.21485	16.315	35.776	16.26	0.41	1.01	-
Atlantic Meridional Transect Project (AMT 6)i	5.8623	-16.0816	North Atlantic Ocean	62.2	epipelagic	141249	2.82498	17478.4	0.661255	158727	3.48623	0.123742	0.234074	25.174	36.777	0	0.01	0.15	-
Atlantic Meridional Transect Project (AMT 6)i	5.8623	-16.0816	North Atlantic Ocean	41.8	epipelagic	456943	9.13885	66148.2	3.83855	523091	12.9774	0.144762	0.420025	25.174	36.777	0	0.01	0.14	-
Atlantic Meridional Transect Project (AMT 6)i	5.8623	-16.0816	North Atlantic Ocean	15.9	surface	445531	8.91062	168924	8.5661	614455	17.4767	0.379151	0.961336	26.783	36.21	0.05	0.01	0.03	-
Atlantic Meridional Transect Project (AMT 6)i	9.0632	-19.121	North Atlantic Ocean	9.1	surface	683705	13.6741	380568	28.4651	1.06427e+06	42.1392	0.556626	2.08168	26.778	36.21	0.05	0.01	0.04	-
Atlantic Meridional Transect Project (AMT 6)i	9.0632	-19.121	North Atlantic Ocean	62.2	epipelagic	347565	6.9513	21616.7	1.03147	369182	7.98277	0.0621946	0.148384	16.648	35.712	20.61	0.14	1.28	-
Atlantic Meridional Transect Project (AMT 6)i	9.0632	-19.121	North Atlantic Ocean	41.2	epipelagic	1.34482e+06	26.8963	149183	15.2039	1.494e+06	42.1002	0.110932	0.565277	22.035	36.199	7.49	0.21	0.51	-
Atlantic Meridional Transect Project (AMT 6)i	12.7894	-19.244	North Atlantic Ocean	9.8	epipelagic	637829	12.7566	375171	16.9793	1.013e+06	29.7359	0.5882	1.33102	23.23	36.253	0.03	0.01	0.15	-
Atlantic Meridional Transect Project (AMT 6)i	12.7894	-19.244	North Atlantic Ocean	52	epipelagic	408717	8.17433	20283.3	1.0291	429000	9.20343	0.0496268	0.125894	26.765	36.442	0.03	0.01	0.09	-
Atlantic Meridional Transect Project (AMT 6)i	12.7894	-19.244	North Atlantic Ocean	24.6	epipelagic	1.00286e+06	20.0572	590956	35.7497	1.59382e+06	55.8069	0.58927	1.78238	26.826	36.257	0.03	0.01	0.06	-
Atlantic Meridional Transect Project (AMT 6)i	16.3782	-20.0042	North Atlantic Ocean	15.9	epipelagic	1.56995e+06	31.3991	252046	33.3002	1.822e+06	64.6993	0.160544	1.06055	26.792	36.214	0.03	0.01	0.04	-
Atlantic Meridional Transect Project (AMT 6)i	16.3782	-20.0042	North Atlantic Ocean	2.3	surface	1455509	29.1102	267491	36.0067	1.723e+06	65.1169	0.183778	1.23691	26.671	35.193	0.03	0.01	0.08	-
Atlantic Meridional Transect Project (AMT 6)i	16.3782	-20.0042	North Atlantic Ocean	62.2	surface	420595	8.41189	12496.4	0.787986	433091	9.19988	0.0297113	0.0936752	26.667	35.192	0.03	0.01	0.09	-
Atlantic Meridional Transect Project (AMT 6)i	16.3782	-20.0042	North Atlantic Ocean	42.6	epipelagic	1.01997e+06	20.3995	14752.5	2.99784	1.03473e+06	23.3973	0.0144636	0.146957	14.548	35.52	20.75	0.07	1.41	-
Atlantic Meridional Transect Project (AMT 6)i	16.3782	-20.0042	North Atlantic Ocean	32.7	epipelagic	1.1926e+06	23.852	22763.4	3.78276	1.21536e+06	27.6348	0.0190872	0.158593	17.992	35.796	16.88	0.23	1.12	-
Atlantic Meridional Transect Project (AMT 6)i	20.4055	-20.0025	North Atlantic Ocean	82	epipelagic	382098	7.64195	538.683	0.0558984	382636	7.69785	0.00140981	0.00731467	19.176	35.836	16.3	0.96	1	-
Atlantic Meridional Transect Project (AMT 6)i	20.4055	-20.0025	North Atlantic Ocean	42.4	epipelagic	593431	11.8686	3386.77	0.54596	596818	12.4146	0.0057071	0.0460003	19.849	35.855	13.61	0.81	0.84	-
Atlantic Meridional Transect Project (AMT 6)i	20.4055	-20.0025	North Atlantic Ocean	32.5	epipelagic	1.50057e+06	30.0115	32790.4	7.47706	1.53336e+06	37.4885	0.0218519	0.24914	22.028	36.007	1.95	0.11	0.39	-
Atlantic Meridional Transect Project (AMT 6)i	20.4055	-20.0025	North Atlantic Ocean	9.4	epipelagic	2.76969e+06	55.3938	572493	143.274	3.34218e+06	198.667	0.206699	2.58646	24.725	36.097	0.08	0.01	0.19	-
Atlantic Meridional Transect Project (AMT 6)i	24.5058	-20.0003	North Atlantic Ocean	77.5	surface	427227	8.54455	65772.7	2.74572	493000	11.2903	0.153953	0.321341	27.004	35.235	0.03	0.01	0.06	-
Atlantic Meridional Transect Project (AMT 6)i	24.5058	-20.0003	North Atlantic Ocean	35.9	surface	240164	4.80328	119836	5.53479	360000	10.3381	0.498977	1.1523	27.016	35.233	0.03	0.01	0.05	-
Atlantic Meridional Transect Project (AMT 6)i	24.5058	-20.0003	North Atlantic Ocean	10.1	epipelagic	327501	6.55002	116317	9.14027	443818	15.6903	0.355167	1.39546	14.977	35.599	20.06	0.07	1.26	-
Atlantic Meridional Transect Project (AMT 6)i	28.6844	-19.8707	North Atlantic Ocean	64.8	epipelagic	352793	7.05586	145207	5.94588	498000	13.0017	0.411592	0.842687	19.751	36.071	11.64	0.35	0.67	-
Atlantic Meridional Transect Project (AMT 6)i	28.6844	-19.8707	North Atlantic Ocean	38.7	epipelagic	291987	5.83973	130468	5.85789	422455	11.6976	0.446828	1.00311	21.13	36.109	1.98	0.01	0.38	-
Atlantic Meridional Transect Project (AMT 6)i	28.6844	-19.8707	North Atlantic Ocean	10	epipelagic	280392	5.60784	105971	4.63495	386364	10.2428	0.37794	0.826512	23.643	35.834	0.01	0.01	0.24	-
Atlantic Meridional Transect Project (AMT 6)i	32.4281	-17.0488	North Atlantic Ocean	57	surface	328174	6.56348	180372	7.56116	508545	14.1246	0.549622	1.15201	25.519	35.63	0.03	0.01	0.09	-
Atlantic Meridional Transect Project (AMT 6)i	32.4281	-17.0488	North Atlantic Ocean	32.5	surface	382035	7.6407	156147	6.81875	538182	14.4595	0.408723	0.892425	25.529	35.629	0.03	0.01	0.08	-
Atlantic Meridional Transect Project (AMT 6)i	36.6141	-17.505	North Atlantic Ocean	2.3	surface	322822	6.45645	177087	7.39121	499909	13.8477	0.548558	1.14478	28.975	34.81	0.03	0.01	0.03	-
Atlantic Meridional Transect Project (AMT 6)i	36.6141	-17.505	North Atlantic Ocean	22.8	surface	386175	7.7235	190189	7.88424	576364	15.6077	0.492493	1.02081	28.973	34.809	0.03	0.01	0.03	-
Atlantic Meridional Transect Project (AMT 6)i	36.6141	-17.505	North Atlantic Ocean	101.5	epipelagic	323300	6.46599	64791.4	2.61713	388091	9.08312	0.200407	0.404753	14.902	35.593	19.26	0.1	1.16	-
Atlantic Meridional Transect Project (AMT 6)i	36.6141	-17.505	North Atlantic Ocean	72.4	epipelagic	429500	8.58999	172864	8.13982	602364	16.7298	0.402478	0.947594	15.716	35.687	18.7	0.14	1.11	-
Atlantic Meridional Transect Project (AMT 6)i	41.0801	-17.4317	North Atlantic Ocean	48.3	epipelagic	770215	15.4043	174603	12.3748	944818	27.7792	0.226693	0.803337	18.807	35.806	16.42	0.28	0.94	-
Atlantic Meridional Transect Project (AMT 6)i	41.0801	-17.4317	North Atlantic Ocean	26.9	epipelagic	431614	8.63227	149841	10.5891	581455	19.2214	0.347165	1.22669	23.45	35.891	6.91	0.27	0.52	-
Atlantic Meridional Transect Project (AMT 6)i	41.0801	-17.4317	North Atlantic Ocean	14.9	epipelagic	326298	6.52597	122247	8.4805	448545	15.0065	0.374648	1.2995	28.781	35.298	0.02	0.01	0.04	-
Atlantic Meridional Transect Project (AMT 6)i	44.6779	-14.0099	North Atlantic Ocean	101.1	epipelagic	322120	6.44239	698.688	0.110854	322818	6.55324	0.00216904	0.017207	28.977	34.812	0.02	0.01	0.02	-
Atlantic Meridional Transect Project (AMT 6)i	44.6779	-14.0099	North Atlantic Ocean	50.5	surface	550026	11.0005	7792.24	1.50103	557818	12.5016	0.014167	0.136451	28.915	34.758	0.03	0	0.03	-
Atlantic Meridional Transect Project (AMT 6)i	44.6779	-14.0099	North Atlantic Ocean	40.8	surface	1.12036e+06	22.4072	39366.6	8.17799	1.15973e+06	30.5852	0.0351374	0.364971	28.904	34.75	0.03	0	0.03	-
Atlantic Meridional Transect Project (AMT 6)i	44.6779	-14.0099	North Atlantic Ocean	35.4	epipelagic	1.4008e+06	28.016	67292.8	13.751	1.46809e+06	41.767	0.0480389	0.490828	14.947	35.584	21.24	0.03	1.43	-
Atlantic Meridional Transect Project (AMT 6)i	44.6779	-14.0099	North Atlantic Ocean	21.9	epipelagic	995713	19.9143	37195.8	7.06576	1.03291e+06	26.98	0.037356	0.354809	16.113	35.692	21.2	0.06	1.41	-
Atlantic Meridional Transect Project (AMT 6)i	44.6779	-14.0099	North Atlantic Ocean	9.4	epipelagic	977831	19.5566	43441.4	8.48875	1.02127e+06	28.0454	0.0444262	0.43406	17.545	35.768	17.95	0.41	1.02	-
Atlantic Meridional Transect Project (AMT 6)i	48.4487	-9.6976	North Atlantic Ocean	83.3	epipelagic	413953	8.27906	501.349	0.045724	414455	8.32479	0.00121112	0.00552285	19.846	35.908	2.34	0.16	0.36	-
Atlantic Meridional Transect Project (AMT 6)i	48.4487	-9.6976	North Atlantic Ocean	63.2	epipelagic	492143	9.84287	1674.72	0.210311	493818	10.0532	0.00340291	0.0213668	23.612	36.06	0.01	0	0.02	-
Atlantic Meridional Transect Project (AMT 6)i	48.4487	-9.6976	North Atlantic Ocean	53.2	epipelagic	699034	13.9807	4874.82	0.716703	703909	14.6974	0.00697365	0.0512638	29.046	34.989	0.02	0	0.02	-
Atlantic Meridional Transect Project (AMT 6)i	48.4487	-9.6976	North Atlantic Ocean	32.8	epipelagic	761672	15.2334	7509.57	1.20682	769182	16.4403	0.00985932	0.079222	27.316	36.06	0.03	0.01	0.02	-
Atlantic Meridional Transect Project (AMT 6)i	48.4487	-9.6976	North Atlantic Ocean	23.3	surface	667744	13.3549	6528.2	1.13293	674273	14.4878	0.0097765	0.0848327	27.315	36.06	0.03	0.01	0.02	-
Atlantic Meridional Transect Project (AMT 6)i	48.4487	-9.6976	North Atlantic Ocean	15.1	surface	714799	14.296	6746.88	1.13888	721545	15.4349	0.00943885	0.0796646	27.312	36.06	0.03	0.01	0.02	-
Atlantic Meridional Transect Project (AMT 6)i	48.4487	-9.6976	North Atlantic Ocean	10.6	epipelagic	740493	14.8099	6506.87	1.11134	747000	15.9212	0.00878721	0.0750403	14.659	35.54	22.65	0.05	1.65	-
Atlantic Meridional Transect Project (AMT 6)i	48.4487	-9.6976	North Atlantic Ocean	7.4	epipelagic	644927	12.8985	6709.54	1.0809	651636	13.9794	0.0104036	0.0838001	15.235	35.591	22.6	0.05	1.64	-
Atlantic Meridional Transect Project (AMT 6)i	49.8386	-4.1532	North Atlantic Ocean	22.2	epipelagic	1.06134e+06	21.2268	59569.9	12.409	1.12091e+06	33.6358	0.0561271	0.584592	15.753	35.628	22.63	0.09	-	-
Atlantic Meridional Transect Project (AMT 6)i	49.8386	-4.1532	North Atlantic Ocean	15.2	epipelagic	1.21572e+06	24.3143	56556.4	12.2154	1.27227e+06	36.5297	0.0465211	0.502396	16.048	35.646	22.51	0.16	1.6	-
Atlantic Meridional Transect Project (AMT 6)i	-33.6239	18.0057	South Atlantic Ocean	30.7	epipelagic	760832	15.2166	7168.07	1.42721	768000	16.6438	0.00942136	0.0937927	18.09	35.809	8.77	0.14	0.92	-
Atlantic Meridional Transect Project (AMT 6)i	-32.3397	17.8766	South Atlantic Ocean	11.9	epipelagic	1.36922e+06	27.3845	43503.7	8.14954	1.41273e+06	35.534	0.0317725	0.297597	21.903	35.94	0.01	0.01	0.09	-
Atlantic Meridional Transect Project (AMT 6)i	-29.5224	16.4526	South Atlantic Ocean	28.5	surface	776398	15.528	602.177	0.108851	777000	15.6368	0.000775604	0.00700998	25.36	36.013	0.03	0.01	0.06	-
Atlantic Meridional Transect Project (AMT 6)i	-29.5224	16.4526	South Atlantic Ocean	14.1	surface	2.39335e+06	47.867	110788	19.179	2.50414e+06	67.046	0.0462898	0.400673	25.368	36.013	0.03	0.01	0.05	-
Atlantic Meridional Transect Project (AMT 6)i	-29.5224	16.4526	South Atlantic Ocean	5.4	epipelagic	2.59489e+06	51.8979	127924	21.5968	2.72282e+06	73.4947	0.0492985	0.416141	14.901	35.584	22.33	0.07	1.62	-
Atlantic Meridional Transect Project (AMT 6)i	-26.6975	14.2451	South Atlantic Ocean	80.9	epipelagic	1.53776e+06	30.7552	17149.6	3.54818	1.55491e+06	34.3034	0.0111523	0.115368	15.245	35.612	22.15	0.08	1.59	-
Atlantic Meridional Transect Project (AMT 6)i	-26.6975	14.2451	South Atlantic Ocean	31.3	epipelagic	2.25408e+06	45.0815	126197	28.2497	2.38027e+06	73.3312	0.0559863	0.626636	15.983	35.695	22.14	0.09	1.58	-
Atlantic Meridional Transect Project (AMT 6)i	-26.6975	14.2451	South Atlantic Ocean	6.3	epipelagic	2.06144e+06	41.2287	146563	34.1499	2.208e+06	75.3786	0.0710973	0.828303	19.522	35.895	11.83	0.55	0.88	-
Atlantic Meridional Transect Project (AMT 6)i	-28.9291	16.1874	South Atlantic Ocean	27.5	epipelagic	849927	16.9985	1709.56	0.376463	851636	17.375	0.00201142	0.0221468	24.419	35.967	0.02	0.01	0.08	-
Atlantic Meridional Transect Project (AMT 6)i	-28.9291	16.1874	South Atlantic Ocean	13.7	epipelagic	2089430	41.7886	124479	26.6578	2.21391e+06	68.4464	0.0595756	0.63792	22.631	36.07	0.03	0.01	0.15	-
Atlantic Meridional Transect Project (AMT 6)i	-28.9291	16.1874	South Atlantic Ocean	5.4	surface	2593582	51.8716	183327	38.8231	2.77691e+06	90.6947	0.0706849	0.748445	22.632	36.07	0.03	0.01	0.15	-
Atlantic Meridional Transect Project (AMT 6)i	-24.7502	14.3237	South Atlantic Ocean	59.7	surface	1.67432e+06	33.4864	953.331	0.15161	1.67527e+06	33.638	0.000569384	0.0045275	22.635	36.068	0.03	0.01	0.15	-
Atlantic Meridional Transect Project (AMT 6)i	-24.7502	14.3237	South Atlantic Ocean	38.1	epipelagic	990580	19.8116	602.026	0.114585	991182	19.9262	0.000607751	0.00578376	16.71	35.99	21.63	0.2	1.26	-
Atlantic Meridional Transect Project (AMT 6)i	-24.7502	14.3237	South Atlantic Ocean	17.9	epipelagic	1.19791e+06	23.9582	4817.9	0.219794	1.20273e+06	24.178	0.00402192	0.00917408	18.138	35.959	8.65	0.46	0.6	-
Atlantic Meridional Transect Project (AMT 6)i	-21.6524	12.4042	South Atlantic Ocean	102	epipelagic	585827	11.7165	809.314	0.161689	586636	11.8782	0.00138149	0.0138001	21.368	36.104	0.24	0.06	0.17	-
Atlantic Meridional Transect Project (AMT 6)i	-18.9959	11.9995	South Atlantic Ocean	62	epipelagic	900535	18.0107	1919.59	0.402332	902455	18.413	0.00213161	0.0223385	22.419	36.134	0.36	0.07	0.19	-
Atlantic Meridional Transect Project (AMT 6)i	-18.9934	11.9981	South Atlantic Ocean	21.9	epipelagic	1.18985e+06	23.7971	6781.65	1.37471	1.19664e+06	25.1718	0.00569956	0.0577681	22.431	36.135	0.16	0.04	0.19	-
Atlantic Meridional Transect Project (AMT 6)i	-14.7433	7.8606	South Atlantic Ocean	52.1	epipelagic	561835	11.2367	35256.3	2.01623	597091	13.2529	0.0627521	0.179433	22.448	36.134	0.13	0.04	0.19	-
Atlantic Meridional Transect Project (AMT 6)i	-14.7433	7.8606	South Atlantic Ocean	27	epipelagic	905206	18.1041	172976	22.3992	1.07818e+06	40.5034	0.19109	1.23725	17.363	36.225	16.91	0.11	1.29	-
Atlantic Meridional Transect Project (AMT 6)i	-11.621	4.1392	South Atlantic Ocean	9.1	epipelagic	423755	8.4751	235790	9.76398	659545	18.2391	0.55643	1.15208	19.056	36.569	10.61	0.13	0.6	-
Atlantic Meridional Transect Project (AMT 6)i	-11.621	4.1392	South Atlantic Ocean	86.6	epipelagic	236164	4.72329	21290.1	0.806283	257455	5.52957	0.0901496	0.170704	19.488	36.571	9.43	0.13	0.53	-
Atlantic Meridional Transect Project (AMT 6)i	-11.621	4.1392	South Atlantic Ocean	67.3	epipelagic	294905	5.89809	31640.8	1.17981	326545	7.0779	0.107292	0.200032	19.643	36.122	8.1	0.7	0.52	-
Atlantic Meridional Transect Project (AMT 6)i	-11.621	4.1392	South Atlantic Ocean	34.1	epipelagic	592085	11.8417	181643	7.96705	773727	19.8087	0.306785	0.672797	20.685	35.93	2.58	0.21	0.23	-
Atlantic Meridional Transect Project (AMT 6)i	-8.6259	0.60533	South Atlantic Ocean	2.3	epipelagic	502685	10.0537	291406	13.2412	794091	23.2949	0.579698	1.31705	20.813	35.925	1.18	0.08	0.16	-
Atlantic Meridional Transect Project (AMT 6)i	-8.6225	0.59833	South Atlantic Ocean	48.9	epipelagic	524986	10.4997	88104.6	5.22747	613091	15.7272	0.167823	0.497867	19.158	36.882	1.49	0.08	0.06	-
Atlantic Meridional Transect Project (AMT 6)i	-8.6225	0.59833	South Atlantic Ocean	36.8	epipelagic	392388	7.84777	257975	9.8473	650364	17.6951	0.657448	1.25479	21.074	37.186	0.58	0.09	0.03	-
Atlantic Meridional Transect Project (AMT 6)i	-8.6225	0.59833	South Atlantic Ocean	18.8	epipelagic	613040	12.2608	287960	12.5616	901000	24.8224	0.469724	1.02453	21.175	37.175	0.05	0.01	0.02	-
Atlantic Meridional Transect Project (AMT 6)i	-5.8631	-2.6293	South Atlantic Ocean	58.6	epipelagic	267945	5.35891	40963.6	1.5077	308909	6.86661	0.15288	0.281345	21.461	37.167	0	0	0.02	-
Atlantic Meridional Transect Project (AMT 6)i	-5.8631	-2.6293	South Atlantic Ocean	48.8	epipelagic	369254	7.38507	63291.9	2.53122	432545	9.9163	0.171405	0.342749	22.107	37.264	0	0	0.16	-
Atlantic Meridional Transect Project (AMT 6)i	-5.8631	-2.6293	South Atlantic Ocean	34.5	epipelagic	522431	10.4486	113024	6.66948	635455	17.1181	0.216342	0.638313	22.43	36.985	0	0	0.02	-
Atlantic Meridional Transect Project (AMT 6)i	-2.8106	-6.1697	South Atlantic Ocean	67.3	epipelagic	257475	5.1495	34161.3	1.26935	291636	6.41885	0.132678	0.2465	22.46	36.975	0	0	0.03	-
Atlantic Meridional Transect Project (AMT 6)i	-2.8106	-6.1697	South Atlantic Ocean	32.7	epipelagic	683220	13.6644	229780	19.8398	913000	33.5042	0.336319	1.45194	16.872	36.458	18.85	0.1	0.21	-
Atlantic Meridional Transect Project (AMT 6)i	-2.8106	-6.1697	South Atlantic Ocean	22.5	epipelagic	724138	14.4827	241590	19.7598	965727	34.2426	0.333624	1.36437	18.046	36.649	9.32	0.08	0.11	-
Atlantic Meridional Transect Project (AMT 6)i	-2.85	-8858.2	South Atlantic Ocean	9.1	epipelagic	711992	14.2398	406553	26.4943	1.11855e+06	40.7341	0.571008	1.86058	19.235	36.877	0.38	0.09	0.01	-
Atlantic Meridional Transect Project (AMT 6)i	3.0732	-12.7717	North Atlantic Ocean	2.3	epipelagic	458726	9.17453	196183	9.27903	654909	18.4536	0.427669	1.01139	19.476	36.88	0.01	0	0.01	-
Atlantic Meridional Transect Project (AMT 6)i	3.0743	-12.772	North Atlantic Ocean	76.8	epipelagic	201497	4.02994	15866.9	0.504979	217364	4.53491	0.0787451	0.125307	20.774	36.969	0	0	0.01	-
Atlantic Meridional Transect Project (AMT 6)i	3.0743	-12.772	North Atlantic Ocean	52	epipelagic	398361	7.96721	36821.3	3.11024	435182	11.0775	0.0924321	0.39038	21.285	36.996	0	0	0.01	-
Atlantic Meridional Transect Project (AMT 6)i	3.0743	-12.772	North Atlantic Ocean	20.3	surface	381070	7.62141	164293	7.83406	545364	15.4555	0.431137	1.0279	21.293	36.995	0	0	0.01	-
Atlantic Meridional Transect Project (AMT 6)i	5.8623	-16.0816	North Atlantic Ocean	2.3	epipelagic	380878	7.61756	148122	8.39512	529000	16.0127	0.388896	1.10207	16.074	36.293	-	0.1	0.3	-
Atlantic Meridional Transect Project (AMT 6)i	5.8624	-16.0818	North Atlantic Ocean	81.4	epipelagic	115827	2.31655	14627.3	0.606125	130455	2.92267	0.126285	0.26165	17.788	36.591	1.74	0.06	0.06	-
Atlantic Meridional Transect Project (AMT 6)i	5.8624	-16.0818	North Atlantic Ocean	51.2	epipelagic	322312	6.44623	29233.9	1.53431	351545	7.98054	0.0907007	0.238016	18.567	36.755	0.04	0.03	0	-
Atlantic Meridional Transect Project (AMT 6)i	9.0632	-19.121	North Atlantic Ocean	2.3	epipelagic	545555	10.9111	348354	24.5272	893909	35.4383	0.638532	2.24791	18.575	36.739	-	-	-	-
Atlantic Meridional Transect Project (AMT 6)i	9.0633	-19.121	North Atlantic Ocean	81.4	epipelagic	271918	5.43836	5445.5	0.271343	277364	5.70971	0.0200263	0.0498942	18.769	36.704	-	-	-	-
Atlantic Meridional Transect Project (AMT 6)i	9.0633	-19.121	North Atlantic Ocean	52	epipelagic	437092	8.74183	36726.5	1.83609	473818	10.5779	0.0840247	0.210035	19.372	36.755	-	-	-	-
Atlantic Meridional Transect Project (AMT 6)i	9.0633	-19.121	North Atlantic Ocean	34.5	surface	749133	14.9827	270958	19.331	1.02009e+06	34.3136	0.361695	1.29022	20.248	36.675	-	-	-	-
Atlantic Meridional Transect Project (AMT 6)i	12.7894	-19.244	North Atlantic Ocean	15.9	epipelagic	770723	15.4145	436914	20.117	1.20764e+06	35.5315	0.566888	1.30508	18.146	36.42	0.03	0.01317	0	-
Atlantic Meridional Transect Project (AMT 6)i	12.7894	-19.244	North Atlantic Ocean	2.3	surface	674679	13.4936	366049	16.2726	1.04073e+06	29.7662	0.542552	1.20595	18.821	36.381	0.03	0.012292	0	-
Atlantic Meridional Transect Project (AMT 6)i	12.792	-19.2444	North Atlantic Ocean	62.2	surface	350278	7.00556	2085.4	0.175901	352364	7.18147	0.00595355	0.0251088	18.838	36.38	0.03	0.012292	0	-
Atlantic Meridional Transect Project (AMT 6)i	12.792	-19.2444	North Atlantic Ocean	41.9	epipelagic	434162	8.68325	29110.2	1.87693	463273	10.5602	0.0670492	0.216156	15.102	36.126	0.68	0.07	0.3	-
Atlantic Meridional Transect Project (AMT 6)i	12.792	-19.2444	North Atlantic Ocean	29.4	epipelagic	1.47833e+06	29.5667	319848	30.9134	1.79818e+06	60.4801	0.216357	1.04555	16.35	36.3	0.69	0.07	0.03	-
Atlantic Meridional Transect Project (AMT 6)i	16.3782	-20.0042	North Atlantic Ocean	10.1	epipelagic	1.52516e+06	30.5032	231566	30.3179	1.75673e+06	60.8211	0.15183	0.993924	16.58	36.314	0.012186	0.0086	0	-
Atlantic Meridional Transect Project (AMT 6)i	16.3778	-20.0048	North Atlantic Ocean	51.2	epipelagic	935694	18.7139	17941.9	3.43874	953636	22.1526	0.0191749	0.183753	17.068	36.407	0	0.01	0	-
Atlantic Meridional Transect Project (AMT 6)i	16.3778	-20.0048	North Atlantic Ocean	37.8	epipelagic	950906	19.0181	16912.5	3.41766	967818	22.4358	0.0177857	0.179705	17.14	36.386	0	0.01	0	-
Atlantic Meridional Transect Project (AMT 6)i	16.3778	-20.0048	North Atlantic Ocean	28.1	epipelagic	1160376	23.2075	24896.8	3.66496	1.18527e+06	26.8725	0.0214558	0.157921	17.989	36.413	0	0.01	0	-
Atlantic Meridional Transect Project (AMT 6)i	20.4055	-20.0025	North Atlantic Ocean	52.4	epipelagic	642646	12.8529	1626.72	0.157686	644273	13.0106	0.00253128	0.0122685	13.944	35.938	6.27	0.08	0.3	-
Atlantic Meridional Transect Project (AMT 6)i	20.4055	-20.0025	North Atlantic Ocean	22.6	epipelagic	2.13055e+06	42.6109	265544	66.3887	2.39609e+06	109	0.124637	1.55802	14.453	35.991	1.41	0.12	0.22	-
Atlantic Meridional Transect Project (AMT 6)i	20.4055	-20.0025	North Atlantic Ocean	14.6	epipelagic	3006517	60.1303	505301	126.606	3.51182e+06	186.736	0.168069	2.10553	14.815	36.012	1.95	0.22	0.11	-
Atlantic Meridional Transect Project (AMT 6)i	24.5058	-20.0003	North Atlantic Ocean	82.4	epipelagic	369623	7.39247	61831.3	2.37986	431455	9.77232	0.167282	0.32193	15.009	36.027	0.47	0.09	0.03	-
Atlantic Meridional Transect Project (AMT 6)i	24.5058	-20.0003	North Atlantic Ocean	67.3	epipelagic	265964	5.31928	75490.4	3.61385	341455	8.93313	0.283837	0.679387	15.299	36.034	0	0	0	-
Atlantic Meridional Transect Project (AMT 6)i	24.5058	-20.0003	North Atlantic Ocean	22.8	epipelagic	300293	6.00586	145434	9.43984	445727	15.4457	0.484309	1.57177	16.485	35.974	0	0	0	-
Atlantic Meridional Transect Project (AMT 6)i	28.6844	-19.8707	North Atlantic Ocean	98	epipelagic	402438	8.04876	94925.6	4.30705	497364	12.3558	0.235876	0.535119	17.17	35.933	0	0	0.02	-
Atlantic Meridional Transect Project (AMT 6)i	28.6844	-19.8707	North Atlantic Ocean	23.2	epipelagic	329409	6.58817	107864	4.75596	437273	11.3441	0.327447	0.721894	12.774	35.819	5.82	0.04	0.31	-
Atlantic Meridional Transect Project (AMT 6)i	32.4281	-17.0488	North Atlantic Ocean	101.6	epipelagic	334373	6.68746	98627.1	4.25992	433000	10.9474	0.294961	0.637002	15.882	35.934	0.67	0.06	0.07	-
Atlantic Meridional Transect Project (AMT 6)i	32.4281	-17.0488	North Atlantic Ocean	9.6	epipelagic	293960	5.87919	117677	5.12459	411636	11.0038	0.400317	0.871648	16.27	35.96	0	0.01	0.01	-
Atlantic Meridional Transect Project (AMT 6)i	36.6141	-17.505	North Atlantic Ocean	9.8	surface	289411	5.78823	155952	6.52273	445364	12.311	0.53886	1.1269	16.279	35.961	0	0.02	0.01	-
Atlantic Meridional Transect Project (AMT 6)i	36.614	-17.5051	North Atlantic Ocean	90.2	epipelagic	423483	8.46967	193062	8.06872	616545	16.5384	0.45589	0.95266	12.897	35.672	6.16	0.47	0.28	-
Atlantic Meridional Transect Project (AMT 6)i	36.614	-17.5051	North Atlantic Ocean	57.5	epipelagic	358918	7.17837	177809	7.45196	536727	14.6303	0.495403	1.03811	13.157	35.665	3.32	0.34	0.19	-
Atlantic Meridional Transect Project (AMT 6)i	36.614	-17.5051	North Atlantic Ocean	37.7	epipelagic	311442	6.22885	171285	7.20586	482727	13.4347	0.549973	1.15685	13.42	35.65	0.61	0.11	0.06	-
Atlantic Meridional Transect Project (AMT 6)i	41.0801	-17.4317	North Atlantic Ocean	81.3	epipelagic	224624	4.49248	3376.11	0.32036	228000	4.81284	0.01503	0.0713104	13.456	35.646	0.25	0.06	0.05	-
Atlantic Meridional Transect Project (AMT 6)i	41.0801	-17.4317	North Atlantic Ocean	57.2	epipelagic	528748	10.575	76525.1	6.22776	605273	16.8027	0.144729	0.588916	13.457	35.646	0.35	0.06	0.06	-
Atlantic Meridional Transect Project (AMT 6)i	41.0801	-17.4317	North Atlantic Ocean	38.7	epipelagic	575792	11.5158	109299	10.318	685091	21.8338	0.189825	0.895981	13.472	35.645	0.32	0.06	0.07	-
Atlantic Meridional Transect Project (AMT 6)i	41.0801	-17.4317	North Atlantic Ocean	10.2	surface	346469	6.92938	128986	8.57998	475455	15.5094	0.372287	1.2382	13.471	35.646	0.34	0.06	0.07	-
Atlantic Meridional Transect Project (AMT 6)i	-18.9934	11.9981	South Atlantic Oean	9.2	epipelagic	1.3313e+06	26.626	9875.48	2.02023	1.34118e+06	28.6463	0.00741792	0.0758745	13.187	35.384	0.17	0.04	0.02	-
Atlantic Meridional Transect Project (AMT 6)i	9.0632	-19.121	North Atlantic Ocean	16	epipelagic	537652	10.753	387530	29.298	925182	40.051	0.720783	2.72462	13.196	35.384	0.09	0.03	0.02	-
Atlantic Meridional Transect Project (AMT 6)i	12.792	-19.2444	North Atlantic Ocean	26.9	epipelagic	1.01756e+06	20.3512	531532	30.1128	1.54909e+06	50.464	0.52236	1.47966	23.112	35.917	0.01	0.01	0.09	-
Atlantic Meridional Transect Project (AMT 6)i	5.8624	-16.0818	North Atlantic Ocean	35.9	epipelagic	458313	9.16625	86141.9	4.88246	544455	14.0487	0.187954	0.532656	24.614	36.101	0.02	0	0	-
Atlantic Meridional Transect Project (AMT 11)i	47.9581	-10.6434	North Atlantic Ocean	3.4	surface	354829	7.09659	2674.08	0.0962669	357503	7.19285	0.00753624	0.0135652	18.634	35.641	0	0	0.04662	0.19499
Atlantic Meridional Transect Project (AMT 11)i	47.9581	-10.6434	North Atlantic Ocean	23.2	epipelagic	422735	8.45469	10201.1	0.36724	432936	8.82193	0.0241313	0.0434363	18.592	35.657	0	0.00129	0.04662	0.36363
Atlantic Meridional Transect Project (AMT 11)i	47.9581	-10.6434	North Atlantic Ocean	33.3	epipelagic	703920	14.0784	15243.5	0.548768	719164	14.6272	0.0216552	0.0389794	17.096	35.692	0.17955	0.03139	0.08442	0.50592
Atlantic Meridional Transect Project (AMT 11)i	47.9581	-10.6434	North Atlantic Ocean	42.8	epipelagic	566834	11.3367	14955	0.538381	581789	11.8751	0.0263834	0.0474902	15.527	35.703	1.59217	0.18318	0.18396	0.77469
Atlantic Meridional Transect Project (AMT 11)i	47.9581	-10.6434	North Atlantic Ocean	53.1	epipelagic	520926	10.4185	14261.8	0.513423	535188	10.932	0.0273777	0.0492798	13.956	35.704	2.85254	0.30659	0.3276	0.98549
Atlantic Meridional Transect Project (AMT 11)i	47.9581	-10.6434	North Atlantic Ocean	67.9	epipelagic	383522	7.67044	6833.76	0.246015	390356	7.91645	0.0178184	0.0320732	13.227	35.698	4.60125	0.08987	0.38682	1.49668
Atlantic Meridional Transect Project (AMT 11)i	47.9581	-10.6434	North Atlantic Ocean	103	epipelagic	264144	5.28288	396.16	0.0142618	264540	5.29714	0.00149979	0.00269962	12.291	35.641	7.41	0.00559	0.56322	2.93539
Atlantic Meridional Transect Project (AMT 11)i	43.921	-14.0546	North Atlantic Ocean	6.4	surface	483706	9.67412	1109.25	0.0399329	484815	9.71405	0.00229323	0.00412781	20.808	35.681	0	0	0.01524	2.03949
Atlantic Meridional Transect Project (AMT 11)i	43.921	-14.0546	North Atlantic Ocean	22.7	epipelagic	265500	5.31001	1904.62	0.0685662	267405	5.37857	0.00717368	0.0129126	20.046	35.729	0	0	0.01524	0.54677
Atlantic Meridional Transect Project (AMT 11)i	43.921	-14.0546	North Atlantic Ocean	32.1	epipelagic	870778	17.4156	10993.4	0.395764	881771	17.8113	0.0126249	0.0227247	18.84	35.73	0	0	0.02413	0.64897
Atlantic Meridional Transect Project (AMT 11)i	43.921	-14.0546	North Atlantic Ocean	47.1	epipelagic	1.08649e+06	21.7297	11444.6	0.412006	1.09793e+06	22.1417	0.0105336	0.0189605	16.788	35.726	0.05625	0.00559	0.04445	0.72562
Atlantic Meridional Transect Project (AMT 11)i	43.921	-14.0546	North Atlantic Ocean	62.3	epipelagic	1.52452e+06	30.4905	41497.8	1.49392	1.56602e+06	31.9844	0.0272202	0.0489963	14.759	35.73	-	-	-	-
Atlantic Meridional Transect Project (AMT 11)i	43.921	-14.0546	North Atlantic Ocean	91.8	epipelagic	349091	6.98182	7368.58	0.265269	356459	7.24709	0.0211079	0.0379942	13.004	35.734	7.20719	0.02924	0.44069	2.37615
Atlantic Meridional Transect Project (AMT 11)i	39.9565	-16.978	North Atlantic Ocean	5.8	surface	650589	13.0118	2707.09	0.0974554	653296	13.1092	0.00416099	0.00748978	21.303	36.185	0.01125	0	0.00847	0.45908
Atlantic Meridional Transect Project (AMT 11)i	39.9565	-16.978	North Atlantic Ocean	21.4	epipelagic	638474	12.7695	1980.8	0.0713088	640455	12.8408	0.0031024	0.00558431	21.292	36.186	0.01125	0	0.00847	0.50898
Atlantic Meridional Transect Project (AMT 11)i	39.9565	-16.978	North Atlantic Ocean	31.5	epipelagic	593204	11.8641	2971.2	0.106963	596175	11.971	0.00500873	0.00901572	20.048	36.167	0.01575	0	0.00847	0.54391
Atlantic Meridional Transect Project (AMT 11)i	39.9565	-16.978	North Atlantic Ocean	54.8	epipelagic	575351	11.507	1584.64	0.057047	576936	11.5641	0.00275421	0.00495759	16.27	36.224	0.01035	0	0.01452	0.59381
Atlantic Meridional Transect Project (AMT 11)i	39.9565	-16.978	North Atlantic Ocean	75.7	epipelagic	500751	10.015	396.16	0.0142618	501147	10.0293	0.000791132	0.00142404	15.557	36.201	0.23625	0.03139	0.03872	0.90818
Atlantic Meridional Transect Project (AMT 11)i	35.8724	-19.8158	North Atlantic Ocean	5	surface	100423	2.00847	198.08	0.00713088	100621	2.0156	0.00197245	0.00355041	22.626	36.556	0.0069	0	0.00875	0.42891
Atlantic Meridional Transect Project (AMT 11)i	35.8724	-19.8158	North Atlantic Ocean	25.8	epipelagic	114335	2.2867	198.08	0.00713088	114533	2.29383	0.00173245	0.00311842	22.631	36.555	0.0138	0	0.00875	0.42891
Atlantic Meridional Transect Project (AMT 11)i	35.8724	-19.8158	North Atlantic Ocean	39.8	epipelagic	223163	4.46326	198.08	0.00713088	223361	4.47039	0.000887602	0.00159768	22.527	36.548	0.0115	0	0.00875	0.42891
Atlantic Meridional Transect Project (AMT 11)i	35.8724	-19.8158	North Atlantic Ocean	79.8	epipelagic	171623	3.43246	264.107	0.00950784	171887	3.44197	0.00153888	0.00276998	15.924	36.145	0.2622	0.02646	0.04	0.94656
Atlantic Meridional Transect Project (AMT 11)i	35.8724	-19.8158	North Atlantic Ocean	94.9	epipelagic	497335	9.9467	1452.59	0.0522931	498788	9.99899	0.00292074	0.00525733	15.26	36.113	1.95412	0.09786	0.1025	1.1832
Atlantic Meridional Transect Project (AMT 11)i	31.572	-21.1896	North Atlantic Ocean	5.1	surface	352620	7.05241	528.213	0.0190157	353149	7.07143	0.00149797	0.00269634	23.913	37.003	0.017	0	0	0.65736
Atlantic Meridional Transect Project (AMT 11)i	31.572	-21.1896	North Atlantic Ocean	21.1	epipelagic	487315	9.74631	619	0.022284	487934	9.76859	0.00127022	0.0022864	23.915	37.002	0.0187	0	0	0.63246
Atlantic Meridional Transect Project (AMT 11)i	31.572	-21.1896	North Atlantic Ocean	41	epipelagic	450972	9.01943	990.4	0.0356544	451962	9.05509	0.00219615	0.00395306	23.583	36.947	0.017	0	0	0.6225
Atlantic Meridional Transect Project (AMT 11)i	31.572	-21.1896	North Atlantic Ocean	81	epipelagic	327726	6.55451	2641.07	0.0950784	330367	6.64959	0.00805877	0.0145058	19.607	36.69	0.02278	0.00215	0	0.65736
Atlantic Meridional Transect Project (AMT 11)i	27.2456	-21.9682	North Atlantic Ocean	5.4	surface	548556	10.9711	396.16	0.0142618	548952	10.9854	0.000722187	0.00129994	23.934	37.187	0.039	0	0	0.59085
Atlantic Meridional Transect Project (AMT 11)i	27.2456	-21.9682	North Atlantic Ocean	31.1	epipelagic	432070	8.6414	528.213	0.0190157	432598	8.66041	0.00122252	0.00220053	23.932	37.206	0.04017	0	0	0.59085
Atlantic Meridional Transect Project (AMT 11)i	27.2456	-21.9682	North Atlantic Ocean	51.1	epipelagic	354085	7.08171	330.133	0.0118848	354416	7.09359	0.000932355	0.00167824	23.653	37.26	0.039	0	0	0.69185
Atlantic Meridional Transect Project (AMT 11)i	27.2456	-21.9682	North Atlantic Ocean	90.1	epipelagic	183844	3.67688	1452.59	0.0522931	185296	3.72917	0.0079012	0.0142222	19.305	36.729	0.039	0.00215	0	0.59085
Atlantic Meridional Transect Project (AMT 11)i	26.2208	-21.781	North Atlantic Ocean	6	surface	462494	9.24988	3169.28	0.114094	465663	9.36398	0.00685258	0.0123347	23.94	37.2	0.0468	0	0	0.79285
Atlantic Meridional Transect Project (AMT 11)i	26.2208	-21.781	North Atlantic Ocean	31	epipelagic	312573	6.25147	1980.8	0.0713088	314554	6.32277	0.00633707	0.0114067	23.783	37.201	0.0429	0	0	0.4646
Atlantic Meridional Transect Project (AMT 11)i	26.2208	-21.781	North Atlantic Ocean	55.7	epipelagic	416040	8.3208	2971.2	0.106963	419011	8.42776	0.00714162	0.0128549	23.211	37.161	0.03705	0	0	0.59085
Atlantic Meridional Transect Project (AMT 11)i	26.2208	-21.781	North Atlantic Ocean	81.6	epipelagic	457029	9.14058	4386.06	0.157898	461415	9.29848	0.00959689	0.0172744	20.634	36.926	0.0429	0	0	0.69185
Atlantic Meridional Transect Project (AMT 11)i	22.9601	-21.1837	North Atlantic Ocean	4.4	surface	541464	10.8293	17034.9	0.613256	558499	11.4425	0.0314608	0.0566294	23.93	36.396	0.03795	0	0.09216	0.40344
Atlantic Meridional Transect Project (AMT 11)i	22.9601	-21.1837	North Atlantic Ocean	25.7	epipelagic	543058	10.8612	22749.2	0.818971	565807	11.6801	0.0418909	0.0754036	23.924	36.394	0.03795	0	0.09856	0.45264
Atlantic Meridional Transect Project (AMT 11)i	22.9601	-21.1837	North Atlantic Ocean	50.4	epipelagic	655596	13.1119	18421.4	0.663172	674018	13.7751	0.0280988	0.0505778	23.875	36.802	1.47964	0.20286	0.17536	0.62484
Atlantic Meridional Transect Project (AMT 11)i	22.9601	-21.1837	North Atlantic Ocean	64.3	epipelagic	676637	13.5327	7092.54	0.255332	683730	13.7881	0.010482	0.0188677	20.969	36.612	4.52592	0.27216	0.30976	1.14144
Atlantic Meridional Transect Project (AMT 11)i	22.9601	-21.1837	North Atlantic Ocean	80.5	epipelagic	339980	6.7996	1782.72	0.0641779	341762	6.86377	0.00524361	0.00943849	19.048	36.477	13.1998	0.06426	0.76416	2.78964
Atlantic Meridional Transect Project (AMT 11)i	21.9534	-20.9989	North Atlantic Ocean	4.7	surface	606366	12.1273	13205.3	0.475392	619571	12.6027	0.0217778	0.0392001	24.438	36.348	0.02805	0	0.05888	0.40344
Atlantic Meridional Transect Project (AMT 11)i	21.9534	-20.9989	North Atlantic Ocean	30	epipelagic	713832	14.2766	38031.4	1.36913	751864	15.6458	0.0532777	0.0958999	24.081	36.415	0.02145	0	0.07168	0.47724
Atlantic Meridional Transect Project (AMT 11)i	21.9534	-20.9989	North Atlantic Ocean	41.3	epipelagic	946849	18.937	23690.4	0.852853	970540	19.7898	0.0250202	0.0450364	22.034	36.483	1.11754	0.13986	0.15616	0.69864
Atlantic Meridional Transect Project (AMT 11)i	21.9534	-20.9989	North Atlantic Ocean	53.8	epipelagic	527766	10.5553	11752.7	0.423099	539519	10.9784	0.0222688	0.0400839	21.186	37.014	0.81579	0.06216	0.09856	0.67404
Atlantic Meridional Transect Project (AMT 11)i	21.9534	-20.9989	North Atlantic Ocean	80.7	epipelagic	524288	10.4858	1386.56	0.0499162	525675	10.5357	0.00264465	0.00476037	18.644	36.563	6.20592	0.11466	0.36736	1.68264
Atlantic Meridional Transect Project (AMT 11)i	12.7475	-20.6644	North Atlantic Ocean	3.5	surface	668852	13.377	8178.79	0.294436	677031	13.6715	0.0122281	0.0220106	28.503	36.116	0.0352	0	0.09648	0.59857
Atlantic Meridional Transect Project (AMT 11)i	12.7475	-20.6644	North Atlantic Ocean	29.7	epipelagic	499885	9.99771	14440.7	0.519864	514326	10.5176	0.028888	0.0519983	26.736	36.197	0.03712	0	0.11658	1.21223
Atlantic Meridional Transect Project (AMT 11)i	12.7475	-20.6644	North Atlantic Ocean	45.3	epipelagic	626770	12.5354	7196.91	0.259089	633966	12.7945	0.0114825	0.0206686	20.735	35.892	3.82788	0.10912	0.45158	2.85201
Atlantic Meridional Transect Project (AMT 11)i	12.7475	-20.6644	North Atlantic Ocean	54.1	epipelagic	668852	13.377	4489.81	0.161633	673342	13.5387	0.00671272	0.0120829	18.725	35.974	13.1048	0.38852	0.88708	3.60651
Atlantic Meridional Transect Project (AMT 11)i	12.7475	-20.6644	North Atlantic Ocean	65.5	epipelagic	464817	9.29634	1245.07	0.0448227	466062	9.34116	0.00267863	0.00482154	16.676	35.799	22.6268	0.13772	1.52358	6.39816
Atlantic Meridional Transect Project (AMT 11)i	12.7475	-20.6644	North Atlantic Ocean	79.8	epipelagic	263515	5.27029	638.968	0.0230028	264154	5.2933	0.00242479	0.00436462	14.94	35.626	28.8106	0.08206	1.71319	8.64405
Atlantic Meridional Transect Project (AMT 11)i	9.7073	-19.4898	North Atlantic Ocean	5.3	surface	666301	13.326	18355.4	0.660795	684657	13.9868	0.0275482	0.0495868	27.867	34.507	0.02175	0	0.00896	1.01258
Atlantic Meridional Transect Project (AMT 11)i	9.7073	-19.4898	North Atlantic Ocean	25.2	epipelagic	746640	14.9328	12148.9	0.437361	758789	15.3702	0.0162714	0.0292886	27.773	34.961	0.029	0	0.01536	1.21818
Atlantic Meridional Transect Project (AMT 11)i	9.7073	-19.4898	North Atlantic Ocean	40.7	epipelagic	553445	11.0689	10564.3	0.380314	564009	11.4492	0.0190882	0.0343588	24.202	35.868	0.2465	0.01232	0.12416	2.50318
Atlantic Meridional Transect Project (AMT 11)i	9.7073	-19.4898	North Atlantic Ocean	50.1	epipelagic	615611	12.3122	2488.7	0.0895931	618100	12.4018	0.00404264	0.00727676	20.371	35.923	5.31801	0.24112	0.46336	3.63398
Atlantic Meridional Transect Project (AMT 11)i	9.7073	-19.4898	North Atlantic Ocean	60.6	epipelagic	325818	6.51636	660.267	0.0237696	326478	6.54013	0.00202649	0.00364768	18.122	35.816	8.55311	0.20592	1.13536	5.25308
Atlantic Meridional Transect Project (AMT 11)i	9.7073	-19.4898	North Atlantic Ocean	99.9	epipelagic	220907	4.41814	264.107	0.00950784	221171	4.42765	0.00119556	0.002152	14.739	35.539	23.3284	0.03806	1.55968	8.16489
Atlantic Meridional Transect Project (AMT 11)i	8.8198	-18.9823	North Atlantic Ocean	4.1	surface	619152	12.383	19609.9	0.705957	638762	13.089	0.0316722	0.05701	27.443	34.402	0.0203	0	0.00896	1.01258
Atlantic Meridional Transect Project (AMT 11)i	8.8198	-18.9823	North Atlantic Ocean	15.6	epipelagic	578982	11.5796	16242.6	0.584732	595225	12.1644	0.0280536	0.0504965	27.415	34.409	0.0232	0	0.00896	1.03828
Atlantic Meridional Transect Project (AMT 11)i	8.8198	-18.9823	North Atlantic Ocean	25	epipelagic	634802	12.696	14121.2	0.508363	648923	13.2044	0.022245	0.040041	27.252	35.189	0.0232	0	0.02176	1.24388
Atlantic Meridional Transect Project (AMT 11)i	8.8198	-18.9823	North Atlantic Ocean	47.8	epipelagic	508796	10.1759	4131.38	0.14873	512928	10.3247	0.00811991	0.0146158	20.321	35.912	1.87693	0.16192	0.352	3.29988
Atlantic Meridional Transect Project (AMT 11)i	8.8198	-18.9823	North Atlantic Ocean	65.2	epipelagic	274843	5.49686	484.196	0.017431	275327	5.51429	0.00176172	0.00317109	17.178	35.727	19.4684	0.13332	1.25056	5.84418
Atlantic Meridional Transect Project (AMT 11)i	8.8198	-18.9823	North Atlantic Ocean	90.5	epipelagic	145249	2.90498	148.56	0.00534816	145398	2.91033	0.0010228	0.00184103	15.335	35.595	23.1774	0.00946	1.4025	9.57942
Atlantic Meridional Transect Project (AMT 11)i	5.9778	-17.4378	North Atlantic Ocean	20.8	epipelagic	482032	9.64065	12396	0.446255	494428	10.0869	0.0257161	0.0462889	27.378	34.611	0	0	0.0091	1.05868
Atlantic Meridional Transect Project (AMT 11)i	5.9778	-17.4378	North Atlantic Ocean	40.8	epipelagic	708702	14.174	9463.82	0.340698	718166	14.5147	0.0133537	0.0240367	27.381	34.611	0	0	0.0221	1.26084
Atlantic Meridional Transect Project (AMT 11)i	5.9778	-17.4378	North Atlantic Ocean	55.6	epipelagic	880857	17.6171	7923.2	0.285235	888780	17.9024	0.00899488	0.0161908	24.514	35.701	0	0	0.0546	2.13332
Atlantic Meridional Transect Project (AMT 11)i	5.9778	-17.4378	North Atlantic Ocean	63	epipelagic	460855	9.21709	1848.75	0.0665549	462703	9.28365	0.00401156	0.00722081	22.382	35.884	0.86052	0.07869	0.1716	2.83024
Atlantic Meridional Transect Project (AMT 11)i	5.9778	-17.4378	North Atlantic Ocean	101.2	epipelagic	211504	4.23008	185.7	0.0066852	211690	4.23676	0.000877998	0.0015804	16.33	35.685	19.7013	0.050095	1.29441	8.74448
Atlantic Meridional Transect Project (AMT 11)i	5.0998	-16.934	North Atlantic Ocean	4.2	surface	456492	9.12983	3961.6	0.142618	460453	9.27245	0.00867836	0.0156211	27.307	34.988	0.00522	0	0.0091	1.10124
Atlantic Meridional Transect Project (AMT 11)i	5.0998	-16.934	North Atlantic Ocean	25	epipelagic	573591	11.4718	3367.36	0.121225	576958	11.593	0.00587066	0.0105672	27.297	34.988	0.0087	0	0.0091	1.10124
Atlantic Meridional Transect Project (AMT 11)i	5.0998	-16.934	North Atlantic Ocean	40.2	epipelagic	591125	11.8225	2491.97	0.0897111	593617	11.9122	0.00421565	0.00758816	27.341	35.316	0	0	0.0156	1.12784
Atlantic Meridional Transect Project (AMT 11)i	5.0998	-16.934	North Atlantic Ocean	54.8	epipelagic	456492	9.12983	1254.51	0.0451622	457746	9.17499	0.00274815	0.00494667	27.3	35.827	0.00232	0	0.0221	1.26084
Atlantic Meridional Transect Project (AMT 11)i	5.0998	-16.934	North Atlantic Ocean	74.4	epipelagic	330643	6.61286	463.591	0.0166893	331107	6.62955	0.00140209	0.00252376	19.164	35.814	8.1949	0.37023	0.6851	3.76124
Atlantic Meridional Transect Project (AMT 11)i	5.0998	-16.934	North Atlantic Ocean	100.3	epipelagic	221540	4.43079	233.035	0.00838927	221773	4.43918	0.00105189	0.0018934	16.171	35.67	20.6526	0.076239	1.22941	8.47848
Atlantic Meridional Transect Project (AMT 11)i	2.1583	-15.3461	North Atlantic Ocean	4.6	surface	909276	18.1855	50180.3	1.80649	959456	19.992	0.0551871	0.0993367	24.42	35.629	0.3969	0.02279	0.12144	1.5622
Atlantic Meridional Transect Project (AMT 11)i	2.1583	-15.3461	North Atlantic Ocean	20.6	epipelagic	1.03361e+06	20.6722	46548.8	1.67576	1.08016e+06	22.3479	0.0450352	0.0810633	24.381	35.629	0.5889	0.03139	0.1452	1.58895
Atlantic Meridional Transect Project (AMT 11)i	2.1583	-15.3461	North Atlantic Ocean	40.2	epipelagic	459026	9.18052	13186.5	0.474713	472212	9.65523	0.0287271	0.0517087	24.205	35.658	0.5649	0.03354	0.15972	1.64245
Atlantic Meridional Transect Project (AMT 11)i	2.1583	-15.3461	North Atlantic Ocean	60.5	epipelagic	777291	15.5458	14085.7	0.507085	791376	16.0529	0.0181215	0.0326187	24.035	35.729	1.85744	0.09159	0.25344	1.9367
Atlantic Meridional Transect Project (AMT 11)i	2.1583	-15.3461	North Atlantic Ocean	78.5	epipelagic	498018	9.96036	6800.75	0.244827	504819	10.2052	0.0136556	0.0245801	21.935	35.844	4.44015	0.21629	0.43164	2.55195
Atlantic Meridional Transect Project (AMT 11)i	2.1583	-15.3461	North Atlantic Ocean	91	epipelagic	242975	4.85949	469.137	0.0168889	243444	4.87638	0.00193081	0.00347545	16.512	35.719	17.9925	0.342839	1.18232	7.9913
Atlantic Meridional Transect Project (AMT 11)i	1.3523	-14.8857	North Atlantic Ocean	4.9	surface	447552	8.95105	25948.5	0.934145	473501	9.88519	0.0579786	0.104362	23.558	35.902	2.07024	0.15179	0.23364	1.85645
Atlantic Meridional Transect Project (AMT 11)i	1.3523	-14.8857	North Atlantic Ocean	40.6	epipelagic	541968	10.8394	19935.8	0.717689	561903	11.557	0.0367841	0.0662114	23.382	35.91	2.35904	0.16039	0.27984	1.9367
Atlantic Meridional Transect Project (AMT 11)i	1.3523	-14.8857	North Atlantic Ocean	70.5	epipelagic	543562	10.8712	10646.8	0.383285	554208	11.2545	0.0195871	0.0352568	22.583	35.794	4.08375	0.26789	0.45804	2.28445
Atlantic Meridional Transect Project (AMT 11)i	1.3523	-14.8857	North Atlantic Ocean	79.9	epipelagic	449024	8.98048	2971.2	0.106963	451995	9.08744	0.00661702	0.0119106	21.968	35.762	6.7122	0.37969	0.56364	2.8997
Atlantic Meridional Transect Project (AMT 11)i	1.3523	-14.8857	North Atlantic Ocean	85.3	epipelagic	406248	8.12496	1574.48	0.0566814	407822	8.18164	0.00387567	0.0069762	20.638	35.84	10.8109	0.41409	0.81444	3.91085
Atlantic Meridional Transect Project (AMT 11)i	1.3523	-14.8857	North Atlantic Ocean	100.4	epipelagic	182356	3.64712	396.16	0.0142618	182752	3.66138	0.00217245	0.00391041	15.829	35.668	21.2757	0.149339	1.11632	8.25879
Atlantic Meridional Transect Project (AMT 11)i	-1.3699	-13.2033	South Atlantic Ocean	5.3	surface	1.18456e+06	23.6912	75270.4	2.70973	1.25983e+06	26.401	0.0635428	0.114377	23.2	35.942	2.27476	0.1248	0.24871	2.35543
Atlantic Meridional Transect Project (AMT 11)i	-1.3699	-13.2033	South Atlantic Ocean	22.8	epipelagic	1.0717e+06	21.4341	65102.3	2.34368	1.13681e+06	23.7778	0.0607465	0.109344	23.125	35.94	3.40696	0.2832	0.32851	2.49018
Atlantic Meridional Transect Project (AMT 11)i	-1.3699	-13.2033	South Atlantic Ocean	35.8	epipelagic	1.09275e+06	21.8549	54934.2	1.97763	1.14768e+06	23.8325	0.0502717	0.0904891	22.742	35.934	4.6292	0.4992	0.42826	2.67883
Atlantic Meridional Transect Project (AMT 11)i	-1.3699	-13.2033	South Atlantic Ocean	45.7	epipelagic	654708	13.0942	42125	1.5165	696833	14.6107	0.0643416	0.115815	21.777	35.924	8.85094	0.9504	0.72751	3.51428
Atlantic Meridional Transect Project (AMT 11)i	-1.3699	-13.2033	South Atlantic Ocean	60.8	epipelagic	441355	8.82709	12875.2	0.463507	454230	9.2906	0.029172	0.0525096	16.708	35.724	18.0519	0.096	1.07158	7.51204
Atlantic Meridional Transect Project (AMT 11)i	-1.3699	-13.2033	South Atlantic Ocean	79.9	epipelagic	216289	4.32577	702.865	0.0253031	216991	4.35107	0.00324966	0.00584939	15.213	35.579	20.0499	0.072	1.13808	9.12904
Atlantic Meridional Transect Project (AMT 11)i	-2.119	-13.1354	South Atlantic Ocean	4.6	surface	1600000	32	70800	2.5488	1670800	34.5488	0.04425	0.07965	23.547	35.966	2.08236	0.0816	0.22211	2.32848
Atlantic Meridional Transect Project (AMT 11)i	-2.119	-13.1354	South Atlantic Ocean	20.3	epipelagic	1470000	29.4	88100	3.1716	1558100	32.5716	0.059932	0.107878	23.406	35.962	2.20076	0.0912	0.26201	2.36621
Atlantic Meridional Transect Project (AMT 11)i	-2.119	-13.1354	South Atlantic Ocean	30.7	epipelagic	1450000	29	69900	2.5164	1519900	31.5164	0.0482069	0.0867724	22.786	35.932	2.82976	0.1344	0.30856	2.49018
Atlantic Meridional Transect Project (AMT 11)i	-2.119	-13.1354	South Atlantic Ocean	40.3	epipelagic	1230000	24.6	63800	2.2968	1293800	26.8968	0.0518699	0.0933659	21.968	35.909	4.3878	0.2568	0.42161	2.75968
Atlantic Meridional Transect Project (AMT 11)i	-2.119	-13.1354	South Atlantic Ocean	45.8	epipelagic	1090000	21.8	47500	1.71	1137500	23.51	0.043578	0.0784404	19.117	35.84	6.19094	0.468	0.60781	3.68514
Atlantic Meridional Transect Project (AMT 11)i	-2.119	-13.1354	South Atlantic Ocean	60.5	epipelagic	570000	11.4	3600	0.1296	573600	11.5296	0.00631579	0.0113684	14.881	35.571	19.4579	0.3168	1.17798	8.85954
Atlantic Meridional Transect Project (AMT 11)i	-2.119	-13.1354	South Atlantic Ocean	99.5	epipelagic	200000	4	1900	0.0684	201900	4.0684	0.0095	0.0171	14.334	35.485	20.7159	0.144	1.19128	10.4765
Atlantic Meridional Transect Project (AMT 11)i	-2.1415	-12.8523	South Atlantic Ocean	15.3	epipelagic	1630000	32.6	96300	3.4668	1726300	36.0668	0.0590798	0.106344	22.987	35.942	4.14595	0.216	0.39128	2.67648
Atlantic Meridional Transect Project (AMT 11)i	-2.1415	-12.8523	South Atlantic Ocean	27.9	epipelagic	1040000	20.8	76800	2.7648	1116800	23.5648	0.0738462	0.132923	21.755	35.901	8.67395	0.4815	0.71958	3.79168
Atlantic Meridional Transect Project (AMT 11)i	-2.1415	-12.8523	South Atlantic Ocean	40.2	epipelagic	1020000	20.4	41700	1.5012	1061700	21.9012	0.0408824	0.0735882	16.32	35.67	17.9696	0.3375	0.865238	7.58173
Atlantic Meridional Transect Project (AMT 11)i	-2.1415	-12.8523	South Atlantic Ocean	55.4	epipelagic	540000	10.8	5200	0.1872	545200	10.9872	0.00962963	0.0173333	14.673	35.541	19.4579	0.135	0.999238	8.39773
Atlantic Meridional Transect Project (AMT 11)i	-1.3587	-12.7237	South Atlantic Ocean	70.3	surface	290000	5.8	2700	0.0972	292700	5.8972	0.00931034	0.0167586	23.032	35.971	2.71136	0.2268	0.29078	2.32288
Atlantic Meridional Transect Project (AMT 11)i	-1.3587	-12.7237	South Atlantic Ocean	4.9	epipelagic	1480000	29.6	134400	4.8384	1614400	34.4384	0.0908108	0.163459	22.694	36.003	3.8205	0.31725	0.3819	2.45888
Atlantic Meridional Transect Project (AMT 11)i	-1.3587	-12.7237	South Atlantic Ocean	21.1	epipelagic	980000	19.6	95300	3.4308	1075300	23.0308	0.0972449	0.175041	21.524	36.016	9.04185	0.918	0.75978	3.62848
Atlantic Meridional Transect Project (AMT 11)i	-1.3587	-12.7237	South Atlantic Ocean	40.7	epipelagic	710000	14.2	19300	0.6948	729300	14.8948	0.0271831	0.0489296	19.392	35.874	12.5356	0.6525	0.93398	4.33568
Atlantic Meridional Transect Project (AMT 11)i	-1.3587	-12.7237	South Atlantic Ocean	51.1	epipelagic	590000	11.8	12400	0.4464	602400	12.2464	0.0210169	0.0378305	17.076	35.734	17.3236	0.10125	1.27528	6.33053
Atlantic Meridional Transect Project (AMT 11)i	-1.3587	-12.7237	South Atlantic Ocean	60.8	epipelagic	390000	7.8	4500	0.162	394500	7.962	0.0115385	0.0207692	15.085	35.589	17.9779	0.0585	1.34764	7.14653
Atlantic Meridional Transect Project (AMT 11)i	-4.4656	-12.6294	South Atlantic Ocean	71.2	surface	330000	6.6	600	0.0216	330600	6.6216	0.00181818	0.00327273	23.752	35.946	1.34519	0.0748	0.24206	1.82268
Atlantic Meridional Transect Project (AMT 11)i	-4.4656	-12.6294	South Atlantic Ocean	5.2	epipelagic	740000	14.8	33000	1.188	773000	15.988	0.0445946	0.0802703	23.622	35.916	1.58004	0.0836	0.27531	1.90503
Atlantic Meridional Transect Project (AMT 11)i	-4.4656	-12.6294	South Atlantic Ocean	20.8	epipelagic	720000	14.4	41200	1.4832	761200	15.8832	0.0572222	0.103	23.226	35.825	2.55596	0.1254	0.34181	2.20698
Atlantic Meridional Transect Project (AMT 11)i	-4.4656	-12.6294	South Atlantic Ocean	41.6	epipelagic	710000	14.2	31600	1.1376	741600	15.3376	0.044507	0.0801127	22.77	35.881	3.56475	0.2662	0.41496	2.34423
Atlantic Meridional Transect Project (AMT 11)i	-4.4656	-12.6294	South Atlantic Ocean	60	epipelagic	720000	14.4	18700	0.6732	738700	15.0732	0.0259722	0.04675	20.377	35.831	8.65725	0.8074	0.825531	3.91821
Atlantic Meridional Transect Project (AMT 11)i	-4.4656	-12.6294	South Atlantic Ocean	80.7	epipelagic	600000	12	5900	0.2124	605900	12.2124	0.00983333	0.0177	19.185	35.807	12.0547	0.836	0.991781	4.46721
Atlantic Meridional Transect Project (AMT 11)i	-7.2274	-14.3031	South Atlantic Ocean	4.7	epipelagic	660000	13.2	43700	1.5732	703700	14.7732	0.0662121	0.119182	23.964	35.908	0.04416	0.0129	0.15738	1.4279
Atlantic Meridional Transect Project (AMT 11)i	-7.2274	-14.3031	South Atlantic Ocean	30.6	epipelagic	580000	11.6	37800	1.3608	617800	12.9608	0.0651724	0.11731	23.979	35.933	0.05376	0.01075	0.15351	1.4279
Atlantic Meridional Transect Project (AMT 11)i	-7.2274	-14.3031	South Atlantic Ocean	61.1	epipelagic	520000	10.4	35900	1.2924	555900	11.6924	0.0690385	0.124269	23.481	35.955	1.41588	0.16985	0.24639	1.67315
Atlantic Meridional Transect Project (AMT 11)i	-7.2274	-14.3031	South Atlantic Ocean	80.4	epipelagic	650000	13	15100	0.5436	665100	13.5436	0.0232308	0.0418154	21.956	35.995	5.859	0.59125	0.572373	2.85417
Atlantic Meridional Transect Project (AMT 11)i	-7.2274	-14.3031	South Atlantic Ocean	89	epipelagic	260000	5.2	2800	0.1008	262800	5.3008	0.0107692	0.0193846	19.623	35.912	9.794	0.2021	0.845853	3.94416
Atlantic Meridional Transect Project (AMT 11)i	-8.0202	-14.8394	South Atlantic Ocean	100	surface	290000	5.8	600	0.0216	290600	5.8216	0.00206897	0.00372414	23.984	35.892	0.01216	0.00645	0.15093	1.40065
Atlantic Meridional Transect Project (AMT 11)i	-8.0202	-14.8394	South Atlantic Ocean	5.3	epipelagic	650000	13	30600	1.1016	680600	14.1016	0.0470769	0.0847385	23.979	35.891	0.01056	0.0043	0.15738	1.4279
Atlantic Meridional Transect Project (AMT 11)i	-8.0202	-14.8394	South Atlantic Ocean	40.3	epipelagic	550000	11	41300	1.4868	591300	12.4868	0.0750909	0.135164	23.94	35.915	0.57063	0.21285	0.22833	1.56415
Atlantic Meridional Transect Project (AMT 11)i	-8.0202	-14.8394	South Atlantic Ocean	79.9	epipelagic	810000	16.2	15300	0.5508	825300	16.7508	0.0188889	0.034	23.606	35.92	2.87922	0.7955	0.37023	1.9729
Atlantic Meridional Transect Project (AMT 11)i	-8.0202	-14.8394	South Atlantic Ocean	89.6	epipelagic	710000	14.2	6500	0.234	716500	14.434	0.00915493	0.0164789	22.09	35.979	10.3115	0.11825	0.865203	4.16216
Atlantic Meridional Transect Project (AMT 11)i	-10.2327	-17.448	South Atlantic Ocean	3.4	epipelagic	590000	11.8	1700	0.0612	591700	11.8612	0.00288136	0.00518644	24.489	36.487	0.00621	0	0.10087	1.14056
Atlantic Meridional Transect Project (AMT 11)i	-10.2327	-17.448	South Atlantic Ocean	30.2	epipelagic	560000	11.2	300	0.0108	560300	11.2108	0.000535714	0.000964286	24.342	36.639	0.00486	0	0.11397	1.11366
Atlantic Meridional Transect Project (AMT 11)i	-10.2327	-17.448	South Atlantic Ocean	59.7	epipelagic	810000	16.2	1500	0.054	811500	16.254	0.00185185	0.00333333	23.577	36.892	0.01701	0	0.15327	1.16746
Atlantic Meridional Transect Project (AMT 11)i	-10.2327	-17.448	South Atlantic Ocean	79.6	epipelagic	520000	10.4	2000	0.072	522000	10.472	0.00384615	0.00692308	21.824	36.566	0.56749	0.0506	0.321867	1.68771
Atlantic Meridional Transect Project (AMT 11)i	-10.9011	-18.245	South Atlantic Ocean	5.2	epipelagic	640159	12.8032	1518.61	0.0546701	641678	12.8579	0.00237224	0.00427004	24.338	36.774	0.00351	0	0.10087	1.11366
Atlantic Meridional Transect Project (AMT 11)i	-10.9011	-18.245	South Atlantic Ocean	55.6	epipelagic	555701	11.114	2944.43	0.106	558645	11.22	0.00529859	0.00953747	23.857	36.831	0.06426	0.00616	0.15327	1.19436
Atlantic Meridional Transect Project (AMT 11)i	-10.9011	-18.245	South Atlantic Ocean	90.2	epipelagic	544518	10.8904	1697.83	0.0611218	546216	10.9515	0.00311804	0.00561247	21.956	36.614	0.87234	0.0814	0.28427	1.43646
Atlantic Meridional Transect Project (AMT 11)i	-10.9011	-18.245	South Atlantic Ocean	101.3	epipelagic	541512	10.8302	935.378	0.0336736	542448	10.8639	0.00172734	0.00310922	21.354	36.518	3.16296	0.1562	0.492167	2.17191
Atlantic Meridional Transect Project (AMT 11)i	-13.0255	-20.7804	South Atlantic Ocean	5.2	epipelagic	495422	9.90844	2442.99	0.0879475	497865	9.99639	0.00493112	0.00887602	24.212	36.974	0.00364	0	0.09052	1.05789
Atlantic Meridional Transect Project (AMT 11)i	-13.0255	-20.7804	South Atlantic Ocean	40.7	epipelagic	468324	9.36647	4489.81	0.161633	472814	9.52811	0.00958699	0.0172566	23.81	37.008	0.00364	0	0.09782	1.05789
Atlantic Meridional Transect Project (AMT 11)i	-13.0255	-20.7804	South Atlantic Ocean	70.2	epipelagic	381290	7.6258	2376.96	0.0855706	383667	7.71137	0.00623399	0.0112212	22.867	36.929	0.00364	0	0.14892	1.00419
Atlantic Meridional Transect Project (AMT 11)i	-13.6653	-21.565	South Atlantic Ocean	5.1	epipelagic	576717	11.5343	1254.51	0.0451622	577972	11.5795	0.00217525	0.00391546	23.706	36.954	0.00364	0	0.08322	1.13844
Atlantic Meridional Transect Project (AMT 11)i	-13.6653	-21.565	South Atlantic Ocean	40.8	epipelagic	599671	11.9934	924.373	0.0332774	600596	12.0267	0.00154147	0.00277464	23.352	37.032	0.00504	0	0.11972	1.13844
Atlantic Meridional Transect Project (AMT 11)i	-13.6653	-21.565	South Atlantic Ocean	69.9	epipelagic	570979	11.4196	2971.2	0.106963	573950	11.5265	0.0052037	0.00936665	22.894	36.954	0.00364	0	0.14162	1.13844
Atlantic Meridional Transect Project (AMT 11)i	-15.7492	-24.0788	South Atlantic Ocean	4.4	epipelagic	376830	7.53661	4261.72	0.153422	381092	7.69003	0.0113094	0.0203569	23.19	37.028	0.00403	0	0.02329	1.09926
Atlantic Meridional Transect Project (AMT 11)i	-15.7492	-24.0788	South Atlantic Ocean	49.7	epipelagic	523199	10.464	3899.7	0.140389	527099	10.6044	0.00745357	0.0134164	23.174	37.025	0.00403	0	0.01644	1.09926
Atlantic Meridional Transect Project (AMT 11)i	-15.7492	-24.0788	South Atlantic Ocean	101.6	epipelagic	518417	10.3683	1980.8	0.0713088	520398	10.4397	0.00382086	0.00687755	23.136	37.013	0.01178	0.00215	0.03014	1.09926
Atlantic Meridional Transect Project (AMT 11)i	-16.427	-24.908	South Atlantic Ocean	4.1	epipelagic	417364	8.34728	2575.04	0.0927014	419939	8.43998	0.00616977	0.0111056	23.454	37.096	0.00558	0	0.00959	1.15506
Atlantic Meridional Transect Project (AMT 11)i	-16.427	-24.908	South Atlantic Ocean	70.5	epipelagic	320511	6.41022	4209.2	0.151531	324720	6.56175	0.0131328	0.023639	23.453	37.096	0.00713	0	0.00959	1.15506
Atlantic Meridional Transect Project (AMT 11)i	-16.427	-24.908	South Atlantic Ocean	101.3	epipelagic	364393	7.28787	3829.55	0.137864	368223	7.42573	0.0105094	0.0189169	23.399	37.08	-	-	-	-
Atlantic Meridional Transect Project (AMT 11)i	-18.456	-27.4114	South Atlantic Ocean	5.5	epipelagic	357322	7.14644	10894.4	0.392198	368216	7.53863	0.030489	0.0548803	23.64	37.171	0.00364	0	0	1.10696
Atlantic Meridional Transect Project (AMT 11)i	-18.456	-27.4114	South Atlantic Ocean	50.7	epipelagic	354771	7.09543	9507.84	0.342282	364279	7.43771	0.0267999	0.0482398	23.277	37.157	0.00364	0	0	1.13436
Atlantic Meridional Transect Project (AMT 11)i	-18.456	-27.4114	South Atlantic Ocean	89.9	epipelagic	488350	9.76701	18223.4	0.656041	506574	10.423	0.0373162	0.0671691	23.068	37.125	0.00364	0	0	1.13436
Atlantic Meridional Transect Project (AMT 11)i	-19.1273	-28.244	South Atlantic Ocean	6.2	epipelagic	437412	8.74824	27731.2	0.998323	465143	9.74656	0.0633984	0.114117	23.246	37.179	0.00364	0	0	1.13436
Atlantic Meridional Transect Project (AMT 11)i	-19.1273	-28.244	South Atlantic Ocean	40.7	epipelagic	444769	8.89538	22496.2	0.809864	467265	9.70524	0.0505796	0.0910432	22.968	37.134	0.00364	0	0	1.13436
Atlantic Meridional Transect Project (AMT 11)i	-19.1273	-28.244	South Atlantic Ocean	79.6	epipelagic	403766	8.07532	22522.4	0.810807	426288	8.88612	0.0557809	0.100406	22.462	36.996	0.01064	0.0043	0	1.18916
Atlantic Meridional Transect Project (AMT 11)i	-21.0575	-30.66	South Atlantic Ocean	5.1	epipelagic	119552	2.39103	15186.1	0.546701	134738	2.93773	0.127026	0.228646	22.918	37.108	0.00102	0	0	0.98923
Atlantic Meridional Transect Project (AMT 11)i	-21.0575	-30.66	South Atlantic Ocean	50.6	epipelagic	120747	2.41494	10234.1	0.368429	130981	2.78337	0.0847567	0.152562	22.844	37.104	0.00272	0	0	0.98923
Atlantic Meridional Transect Project (AMT 11)i	-21.0575	-30.66	South Atlantic Ocean	99.8	epipelagic	113574	2.27148	7725.12	0.278104	121299	2.54959	0.0680183	0.122433	22.675	37.061	0.00612	0.0044	0	1.01568
Atlantic Meridional Transect Project (AMT 11)i	-21.7444	-31.516	South Atlantic Ocean	4.6	epipelagic	402066	8.04132	11554.7	0.415968	413621	8.45729	0.0287382	0.0517288	22.946	37.12	0.00272	0	0	0.98923
Atlantic Meridional Transect Project (AMT 11)i	-21.7444	-31.516	South Atlantic Ocean	40.9	epipelagic	473570	9.47139	11565.3	0.416351	485135	9.88774	0.0244216	0.0439588	22.824	37.106	0.00272	0	0	0.98923
Atlantic Meridional Transect Project (AMT 11)i	-21.7444	-31.516	South Atlantic Ocean	79.8	epipelagic	497386	9.94772	13733.5	0.494408	511120	10.4421	0.0276114	0.0497006	22.643	37.062	0.00442	0	0	1.01568
Atlantic Meridional Transect Project (AMT 11)i	-23.8044	-34.1304	South Atlantic Ocean	5	epipelagic	374985	7.4997	14856	0.534816	389841	8.03451	0.0396176	0.0713117	23.213	37.186	0.00232	0	0	0.84888
Atlantic Meridional Transect Project (AMT 11)i	-23.8044	-34.1304	South Atlantic Ocean	39.8	epipelagic	428152	8.56303	15318.2	0.551455	443470	9.11449	0.0357775	0.0643995	23.065	37.165	0.00377	0	0	0.84888
Atlantic Meridional Transect Project (AMT 11)i	-23.8044	-34.1304	South Atlantic Ocean	79.8	epipelagic	345017	6.90035	16176.5	0.582355	361194	7.4827	0.0468862	0.0843951	21.986	36.895	0.13717	0.0704	0	0.84888
Atlantic Meridional Transect Project (AMT 11)i	-24.595	-35.148	South Atlantic Ocean	5	epipelagic	505389	10.1078	15186.1	0.546701	520575	10.6545	0.0300484	0.0540871	22.119	36.95	0.00667	0	0	0.87508
Atlantic Meridional Transect Project (AMT 11)i	-24.595	-35.148	South Atlantic Ocean	40.7	epipelagic	423411	8.46821	9776.21	0.351943	433187	8.82016	0.0230892	0.0415605	21.815	36.9	0.00957	0	0	0.87508
Atlantic Meridional Transect Project (AMT 11)i	-24.595	-35.148	South Atlantic Ocean	75.7	epipelagic	407357	8.14713	10762.3	0.387444	418119	8.53458	0.02642	0.0475559	21.698	36.881	0.09077	0.0528	0	0.82268
Atlantic Meridional Transect Project (AMT 11)i	-26.6121	-37.76	South Atlantic Ocean	4.2	epipelagic	333235	6.66469	11501.4	0.414051	344736	7.07874	0.0345145	0.0621261	22.025	36.898	0	0	0.02816	0.79496
Atlantic Meridional Transect Project (AMT 11)i	-26.6121	-37.76	South Atlantic Ocean	40	epipelagic	355949	7.11899	8817.75	0.317439	364767	7.43643	0.0247725	0.0445905	20.89	36.647	0.01593	0.01505	0.04096	0.76881
Atlantic Meridional Transect Project (AMT 11)i	-26.6121	-37.76	South Atlantic Ocean	80.3	epipelagic	417399	8.34798	5282.13	0.190157	422681	8.53814	0.0126549	0.0227788	19.729	36.398	1.54308	0.03655	0.19456	1.13491
Atlantic Meridional Transect Project (AMT 11)i	-27.3205	-38.7	South Atlantic Ocean	5.1	epipelagic	522778	10.4556	8781.55	0.316136	531560	10.7717	0.0167978	0.0302361	20.106	36.246	0	0	0.00256	0.84726
Atlantic Meridional Transect Project (AMT 11)i	-27.3205	-38.7	South Atlantic Ocean	31.6	epipelagic	627810	12.5562	7394.99	0.26622	635205	12.8224	0.011779	0.0212022	18.684	36.124	0.03753	0.01075	0.05376	0.89956
Atlantic Meridional Transect Project (AMT 11)i	-27.3205	-38.7	South Atlantic Ocean	89.7	epipelagic	481479	9.62957	6866.77	0.247204	488345	9.87678	0.0142618	0.0256713	17.641	35.941	1.67487	0.05805	0.17536	1.21336
Atlantic Meridional Transect Project (AMT 11)i	-29.3116	-41.345	South Atlantic Ocean	5.7	epipelagic	633548	12.671	20930.5	0.753496	654479	13.4245	0.0330369	0.0594664	19.755	36.51	0	0	0.04	0.7128
Atlantic Meridional Transect Project (AMT 11)i	-29.3116	-41.345	South Atlantic Ocean	30.1	epipelagic	566599	11.332	16902.8	0.608502	583502	11.9405	0.0298321	0.0536977	17.68	36.094	0.2925	0.0484	0.1275	1.0638
Atlantic Meridional Transect Project (AMT 11)i	-29.3116	-41.345	South Atlantic Ocean	79.6	epipelagic	564245	11.2849	18338.4	0.660181	582584	11.9451	0.0325007	0.0585013	17.422	36.074	1.06736	0.0242	0.1775	1.2528
Atlantic Meridional Transect Project (AMT 11)i	-29.3116	-41.345	South Atlantic Ocean	99.8	epipelagic	669892	13.3978	49378.5	1.77763	719271	15.1755	0.0737112	0.13268	17.206	36.034	1.50416	0.0176	0.2025	1.3338
Atlantic Meridional Transect Project (AMT 11)i	-30.0866	-42.37	South Atlantic Ocean	5.2	epipelagic	548862	10.9772	18091.3	0.651287	566954	11.6285	0.0329615	0.0593306	18.16	36.123	0	0	0.05875	0.5778
Atlantic Meridional Transect Project (AMT 11)i	-30.0866	-42.37	South Atlantic Ocean	50.9	epipelagic	581902	11.638	15780.4	0.568093	597682	12.2061	0.0271186	0.0488135	18.06	36.109	0.01365	0.0132	0.065	0.6318
Atlantic Meridional Transect Project (AMT 11)i	-30.0866	-42.37	South Atlantic Ocean	75.5	epipelagic	573074	11.4615	11092.5	0.399329	584166	11.8608	0.0193561	0.034841	17.748	36.079	0.3965	0.0638	0.1275	0.9828
Atlantic Meridional Transect Project (AMT 11)i	-30.0866	-42.37	South Atlantic Ocean	83	epipelagic	469865	9.3973	6338.56	0.228188	476204	9.62549	0.0134902	0.0242823	17.249	36.005	0.87136	0.0264	0.17125	1.1718
Atlantic Meridional Transect Project (AMT 11)i	-30.0866	-42.37	South Atlantic Ocean	95.4	epipelagic	317294	6.34589	3029.46	0.109061	320324	6.45495	0.00954779	0.017186	17.122	36.021	1.12336	0.0132	0.19	1.2528
Atlantic Meridional Transect Project (AMT 11)i	-33.145	-46.5976	South Atlantic Ocean	5.5	surface	483318	9.66636	18025.3	0.64891	501343	10.3153	0.0372949	0.0671308	16.528	35.824	0	0	0.08375	0.97524
Atlantic Meridional Transect Project (AMT 11)i	-33.145	-46.5976	South Atlantic Ocean	30.8	epipelagic	536690	10.7338	14525.9	0.522931	551216	11.2567	0.0270657	0.0487182	16.496	35.822	0.0041	0.0105	0.08375	1.00359
Atlantic Meridional Transect Project (AMT 11)i	-33.145	-46.5976	South Atlantic Ocean	59.8	epipelagic	411114	8.22228	12413	0.446868	423527	8.66915	0.0301936	0.0543485	16.482	35.825	0.1845	0.308	0.1025	1.11699
Atlantic Meridional Transect Project (AMT 11)i	-33.145	-46.5976	South Atlantic Ocean	77.9	epipelagic	627810	12.5562	8583.47	0.309005	636393	12.8652	0.0136721	0.0246097	16.308	35.808	0.7544	0.168	0.1275	1.20204
Atlantic Meridional Transect Project (AMT 11)i	-33.145	-46.5976	South Atlantic Ocean	89.5	epipelagic	458206	9.16412	7791.15	0.280481	465997	9.4446	0.0170036	0.0306065	15.829	35.781	2.51965	0.0735	0.24625	1.51389
Atlantic Meridional Transect Project (AMT 12)i	47.688	-12.682	North Atlantic Ocean	3.1	surface	2.04626e+06	40.9252	14048.2	2.77867	2.06031e+06	43.7039	0.00686528	0.0678963	14.392	35.627	0.04	0.02	0.12	0.3
Atlantic Meridional Transect Project (AMT 12)i	47.688	-12.682	North Atlantic Ocean	22	epipelagic	2.00659e+06	40.1317	20509.5	4.12625	2.02709e+06	44.2579	0.0102211	0.102818	14.164	35.623	0.11	0.05	0.13	0.36
Atlantic Meridional Transect Project (AMT 12)i	47.688	-12.682	North Atlantic Ocean	34.7	epipelagic	1.76943e+06	35.3887	8834.11	1.65911	1.77827e+06	37.0478	0.00499262	0.0468824	13.804	35.631	0.2	0.07	0.19	0.42
Atlantic Meridional Transect Project (AMT 12)i	47.688	-12.682	North Atlantic Ocean	75.4	epipelagic	537467	10.7493	172.498	0.0377545	537640	10.7871	0.000320946	0.00351226	12.501	35.677	0.95	0.07	0.51	2.93
Atlantic Meridional Transect Project (AMT 12)i	47.688	-12.682	North Atlantic Ocean	100.7	epipelagic	566125	11.3225	143.168	0.0315507	566268	11.354	0.000252891	0.00278655	12.231	35.672	7.97	0.07	0.59	3.18
Atlantic Meridional Transect Project (AMT 12)i	41.4925	-20.0202	North Atlantic Ocean	1.9	surface	1.13733e+06	22.7466	34923.5	6.09668	1.17225e+06	28.8433	0.0307065	0.268026	17.029	35.85	0.02	0.02	0.08	0.54
Atlantic Meridional Transect Project (AMT 12)i	41.4925	-20.0202	North Atlantic Ocean	17.2	epipelagic	1.46723e+06	29.3446	45162.7	7.83204	1.51239e+06	37.1767	0.0307809	0.266899	16.851	35.858	0.04	0.02	0.1	0.54
Atlantic Meridional Transect Project (AMT 12)i	41.4925	-20.0202	North Atlantic Ocean	23	epipelagic	1.46357e+06	29.2714	45054.1	8.0341	1.50862e+06	37.3055	0.0307837	0.274469	16.721	35.854	0.57	0.02	0.13	0.74
Atlantic Meridional Transect Project (AMT 12)i	41.4925	-20.0202	North Atlantic Ocean	48.7	epipelagic	971620	19.4324	13296.7	2.71071	984917	22.1431	0.0136851	0.139494	14.015	35.806	2.66	0.16	0.24	1.87
Atlantic Meridional Transect Project (AMT 12)i	41.4925	-20.0202	North Atlantic Ocean	75.7	epipelagic	721562	14.4312	2303.28	0.501496	723865	14.9327	0.00319207	0.0347508	13.634	35.817	4.88	0.02	0.35	2.14
Atlantic Meridional Transect Project (AMT 12)i	41.4925	-20.0202	North Atlantic Ocean	101	epipelagic	620962	12.4192	1039.55	0.213955	622002	12.6332	0.00167409	0.0172277	13.494	35.821	5.52	0.02	0.4	2.23
Atlantic Meridional Transect Project (AMT 12)i	45.6501	-18.5291	North Atlantic Ocean	27	epipelagic	1.66128e+06	33.2256	21398.1	4.06318	1.68268e+06	37.2888	0.0128805	0.122291	14.881	35.746	1.01	0.12	-	0.49
Atlantic Meridional Transect Project (AMT 12)i	45.6501	-18.5291	North Atlantic Ocean	47.3	epipelagic	1.43715e+06	28.7431	13317.9	2.65796	1.45047e+06	31.401	0.00926683	0.092473	14.476	35.732	1.95	0.11	-	0.72
Atlantic Meridional Transect Project (AMT 12)i	45.6501	-18.5291	North Atlantic Ocean	75.9	epipelagic	979968	19.5994	3472.08	0.669807	983440	20.2692	0.00354306	0.0341749	12.879	35.717	5.56	0.59	-	2.73
Atlantic Meridional Transect Project (AMT 12)i	45.6501	-18.5291	North Atlantic Ocean	101	epipelagic	744536	14.8907	1939.22	0.374586	746475	15.2653	0.0026046	0.0251556	12.744	35.733	6.1	0.08	-	3.07
Atlantic Meridional Transect Project (AMT 12)i	-24.8789	-25.0005	South Atlantic Ocean	11	epipelagic	826662	16.5332	65601.3	2.4644	892264	18.9976	0.0793568	0.149057	24.341	36.541	0.02	0.02	0.03	0.79
Atlantic Meridional Transect Project (AMT 12)i	-24.8789	-25.0005	South Atlantic Ocean	25.9	epipelagic	755977	15.1195	59853.3	2.25284	815831	17.3724	0.0791735	0.149002	24.331	36.541	0.02	0.02	0.03	0.78
Atlantic Meridional Transect Project (AMT 12)i	-24.8789	-25.0005	South Atlantic Ocean	51.4	epipelagic	829680	16.5936	66270.9	2.50364	895951	19.0972	0.0798752	0.15088	24.325	36.541	0.02	0.02	0.03	0.8
Atlantic Meridional Transect Project (AMT 12)i	-24.8789	-25.0005	South Atlantic Ocean	78.4	epipelagic	530934	10.6187	12974.1	0.533163	543909	11.1519	0.0244364	0.0502098	22.207	36.388	0.02	0.02	0.05	1.03
Atlantic Meridional Transect Project (AMT 12)i	-24.8789	-25.0005	South Atlantic Ocean	100	epipelagic	399871	7.99741	5979.5	0.20469	405850	8.2021	0.0149536	0.0255945	20.111	36.185	0.07	0.03	0.09	1.06
Atlantic Meridional Transect Project (AMT 12)i	-21.6291	-25.001	South Atlantic Ocean	10.3	surface	864534	17.2907	64226.5	2.38962	928761	19.6803	0.0742903	0.138203	26.613	37.29	0.02	0.02	-	1.1
Atlantic Meridional Transect Project (AMT 12)i	-21.6291	-25.001	South Atlantic Ocean	22.3	epipelagic	979142	19.5828	72712.4	2.68998	1.05185e+06	22.2728	0.0742613	0.137364	26.613	37.29	0.02	0.02	-	1.07
Atlantic Meridional Transect Project (AMT 12)i	-21.6291	-25.001	South Atlantic Ocean	60.2	epipelagic	909900	18.198	67664.1	2.5461	977564	20.7441	0.0743643	0.139911	26.61	37.29	0.02	0.02	-	1.1
Atlantic Meridional Transect Project (AMT 12)i	-20.4944	-24.993	South Atlantic Ocean	13.2	epipelagic	820155	16.4031	62904.7	2.3324	883060	18.7355	0.0766986	0.142193	26.456	37.096	0.02	0.02	-	0.89
Atlantic Meridional Transect Project (AMT 12)i	-20.4944	-24.993	South Atlantic Ocean	52.6	epipelagic	825523	16.5105	63520.2	2.40026	889044	18.9107	0.0769453	0.145378	26.383	37.139	0.02	0.02	-	0.72
Atlantic Meridional Transect Project (AMT 12)i	-28.7932	-25.9871	South Atlantic Ocean	2.7	surface	939448	18.7889	70141.8	2.73009	1.00959e+06	21.519	0.0746628	0.145303	22.421	35.824	0.02	0.02	-	0.86
Atlantic Meridional Transect Project (AMT 12)i	-28.7932	-25.9871	South Atlantic Ocean	9.7	surface	595312	11.9062	39708.1	1.65497	635020	13.5612	0.0667013	0.139001	22.402	35.825	0.02	0.02	0.08	0.95
Atlantic Meridional Transect Project (AMT 12)i	-28.7932	-25.9871	South Atlantic Ocean	25.2	epipelagic	516316	10.3263	46657.6	1.91744	562974	12.2438	0.0903664	0.185685	22.383	35.825	0.02	0.02	0.07	0.93
Atlantic Meridional Transect Project (AMT 12)i	-28.7932	-25.9871	South Atlantic Ocean	49.5	epipelagic	712048	14.241	54869.2	2.23161	766917	16.4726	0.0770582	0.156704	22.364	35.823	0.02	0.02	0.08	0.96
Atlantic Meridional Transect Project (AMT 12)i	-28.7932	-25.9871	South Atlantic Ocean	90.9	epipelagic	264807	5.29613	6120.28	0.225968	270927	5.5221	0.0231122	0.0426666	17.977	35.737	0.08	0.02	0.15	1.09
Atlantic Meridional Transect Project (AMT 12)i	30.291	-25.7212	North Atlantic Ocean	2.2	surface	879209	17.5842	3481.87	0.698404	882691	18.2826	0.00396023	0.0397177	21.543	36.839	0.02	0.02	0.06	0.81
Atlantic Meridional Transect Project (AMT 12)i	30.291	-25.7212	North Atlantic Ocean	10.5	epipelagic	814510	16.2902	2434.8	0.487852	816945	16.7781	0.00298928	0.0299476	21.504	36.841	0.02	0.02	0.07	0.82
Atlantic Meridional Transect Project (AMT 12)i	30.291	-25.7212	North Atlantic Ocean	25.7	epipelagic	953990	19.0798	2925.72	0.584143	956916	19.6639	0.00306683	0.0306158	20.348	36.751	0.02	0.02	0.07	0.8
Atlantic Meridional Transect Project (AMT 12)i	30.291	-25.7212	North Atlantic Ocean	50.6	epipelagic	888558	17.7712	4755.71	0.891819	893313	18.663	0.00535217	0.0501835	19.628	36.768	0.02	0.02	0.07	0.81
Atlantic Meridional Transect Project (AMT 12)i	30.291	-25.7212	North Atlantic Ocean	75.5	epipelagic	933418	18.6684	6195.07	1.25681	939613	19.9252	0.00663698	0.0673228	18.804	36.664	0.02	0.02	0.06	0.82
Atlantic Meridional Transect Project (AMT 12)i	30.291	-25.7212	North Atlantic Ocean	103	epipelagic	914622	18.2924	9729.92	0.951951	924352	19.2444	0.0106382	0.0520407	18.474	36.623	0.13	0.03	0.05	-
Atlantic Meridional Transect Project (AMT 12)i	32.6815	-22.8661	North Atlantic Ocean	7.9	surface	745656	14.9131	60478	2.97432	806134	17.8874	0.0811072	0.199444	21.432	36.819	0.02	0.02	0.03	-
Atlantic Meridional Transect Project (AMT 12)i	32.6815	-22.8661	North Atlantic Ocean	19.9	epipelagic	938541	18.7708	75507.6	3.63372	1.01405e+06	22.4045	0.0804521	0.193583	20.715	36.822	0.02	0.02	0.05	0.89
Atlantic Meridional Transect Project (AMT 12)i	32.6815	-22.8661	North Atlantic Ocean	36.1	epipelagic	941583	18.8317	75749.6	3.61454	1.01733e+06	22.4462	0.0804491	0.191939	19.688	36.752	0.02	0.02	0.05	0.89
Atlantic Meridional Transect Project (AMT 12)i	32.6815	-22.8661	North Atlantic Ocean	62.4	epipelagic	1.05791e+06	21.1582	89446.7	4.20705	1.14736e+06	25.3653	0.0845503	0.198838	19.242	36.78	0.02	0.02	0.04	0.88
Atlantic Meridional Transect Project (AMT 12)i	32.6815	-22.8661	North Atlantic Ocean	100.9	epipelagic	1329112	26.5822	20715.1	1.44404	1.34983e+06	28.0263	0.0155857	0.0543234	18.765	36.741	0.02	0.02	0.04	0.89
Atlantic Meridional Transect Project (AMT 12)i	33.6242	-21.7148	North Atlantic Ocean	2	surface	909135	18.1827	4749.2	0.829592	913884	19.0123	0.00522386	0.0456253	21.174	36.724	0.02	0.02	0.05	0.79
Atlantic Meridional Transect Project (AMT 12)i	33.6242	-21.7148	North Atlantic Ocean	10.5	surface	885107	17.7021	4696.97	0.861717	889804	18.5638	0.00530668	0.0486787	21.076	36.721	0.02	0.02	0.05	0.77
Atlantic Meridional Transect Project (AMT 12)i	33.6242	-21.7148	North Atlantic Ocean	49.9	epipelagic	956536	19.1307	3456.55	0.646741	959993	19.7775	0.00361362	0.0338064	18.516	36.524	0.02	0.02	0.06	0.77
Atlantic Meridional Transect Project (AMT 12)i	33.6242	-21.7148	North Atlantic Ocean	75.2	epipelagic	1.04025e+06	20.805	19060.5	1.57479	1.05931e+06	22.3798	0.018323	0.0756928	17.993	36.546	0.02	0.02	0.05	0.82
Atlantic Meridional Transect Project (AMT 12)i	33.6242	-21.7148	North Atlantic Ocean	94.9	epipelagic	968476	19.3695	25498.6	1.53918	993974	20.9087	0.0263286	0.0794639	17.881	36.556	0.02	0.02	0.05	0.73
Atlantic Meridional Transect Project (AMT 12)i	27.2124	-29.2995	North Atlantic Ocean	2	surface	714444	14.2889	53361.9	1.92069	767806	16.2096	0.07469	0.134418	22.999	37.414	0.02	0.02	0.06	0.73
Atlantic Meridional Transect Project (AMT 12)i	27.2124	-29.2995	North Atlantic Ocean	51.4	epipelagic	701119	14.0224	55124.2	2.39822	756243	16.4206	0.0786231	0.171028	22.324	37.356	0.02	0.02	0.07	0.73
Atlantic Meridional Transect Project (AMT 12)i	27.2124	-29.2995	North Atlantic Ocean	77.1	epipelagic	704194	14.0839	55878.6	2.53279	760072	16.6167	0.0793512	0.179836	22.197	37.383	0.02	0.02	0.06	0.65
Atlantic Meridional Transect Project (AMT 12)i	27.2124	-29.2995	North Atlantic Ocean	101.5	epipelagic	757922	15.1584	59106	2.6301	817028	17.7885	0.0779843	0.173507	21.87	37.32	0.02	0.02	0.06	0.65
Atlantic Meridional Transect Project (AMT 12)i	22.2317	-34.9006	North Atlantic Ocean	2.1	surface	746903	14.9381	58276.2	2.35898	805180	17.2971	0.0780237	0.157918	24.212	37.517	0.02	0.02	0.08	0.67
Atlantic Meridional Transect Project (AMT 12)i	22.2317	-34.9006	North Atlantic Ocean	10.1	surface	839546	16.7909	66103.7	2.71108	905650	19.502	0.0787375	0.161461	24.211	37.52	0.02	0.02	0.1	0.68
Atlantic Meridional Transect Project (AMT 12)i	22.2317	-34.9006	North Atlantic Ocean	24.7	epipelagic	770137	15.4027	60831.8	2.54021	830969	17.9429	0.0789883	0.16492	24.188	37.524	0.02	0.02	0.09	0.69
Atlantic Meridional Transect Project (AMT 12)i	22.2317	-34.9006	North Atlantic Ocean	49.8	epipelagic	896744	17.9349	70590.4	2.99568	967335	20.9306	0.0787186	0.167031	24.068	37.505	0.02	0.02	0.09	0.71
Atlantic Meridional Transect Project (AMT 12)i	22.2317	-34.9006	North Atlantic Ocean	74.4	epipelagic	542267	10.8453	6293.18	0.338347	548560	11.1837	0.0116053	0.0311975	23.532	37.472	0.02	0.02	0.08	0.74
Atlantic Meridional Transect Project (AMT 12)i	22.2317	-34.9006	North Atlantic Ocean	99.7	epipelagic	675999	13.52	14815.2	0.684206	690814	14.2042	0.021916	0.050607	23.121	37.437	-	-	-	-
Atlantic Meridional Transect Project (AMT 12)i	24.3287	-32.5738	North Atlantic Ocean	7.2	surface	993739	19.8748	77506.8	3.19975	1.07125e+06	23.0745	0.0779951	0.160995	23.645	37.425	0.02	0.02	0.08	0.66
Atlantic Meridional Transect Project (AMT 12)i	24.3287	-32.5738	North Atlantic Ocean	18.7	epipelagic	970790	19.4158	76070.2	3.1876	1.04686e+06	22.6034	0.0783591	0.164175	23.638	37.423	0.02	0.02	0.08	0.68
Atlantic Meridional Transect Project (AMT 12)i	24.3287	-32.5738	North Atlantic Ocean	34.7	epipelagic	996663	19.9333	78247.7	3.27674	1.07491e+06	23.21	0.0785097	0.164385	23.484	37.428	0.02	0.02	0.08	0.69
Atlantic Meridional Transect Project (AMT 12)i	24.3287	-32.5738	North Atlantic Ocean	60.8	epipelagic	1.05135e+06	21.0269	84697	3.6323	1.13604e+06	24.6592	0.0805604	0.172745	23.228	37.415	0.02	0.02	0.09	0.71
Atlantic Meridional Transect Project (AMT 12)i	24.329	-32.5733	North Atlantic Ocean	10.2	surface	802874	16.0575	61942.1	2.69327	864816	18.7507	0.0771504	0.167727	23.64	37.425	0.02	0.02	0.07	0.66
Atlantic Meridional Transect Project (AMT 12)i	24.329	-32.5733	North Atlantic Ocean	25.5	epipelagic	844038	16.8808	64672.3	2.76435	908711	19.6451	0.0766225	0.163757	23.629	37.425	0.02	0.02	0.06	0.66
Atlantic Meridional Transect Project (AMT 12)i	24.329	-32.5733	North Atlantic Ocean	49.7	epipelagic	1.08623e+06	21.7247	83283	3.61887	1.16952e+06	25.3435	0.0766714	0.166579	23.516	37.427	0.02	0.02	0.06	0.66
Atlantic Meridional Transect Project (AMT 12)i	24.329	-32.5733	North Atlantic Ocean	75.4	epipelagic	754234	15.0847	58184.1	2.68284	812418	17.7675	0.0771433	0.177852	22.994	37.435	0.02	0.02	0.05	0.69
Atlantic Meridional Transect Project (AMT 12)i	24.329	-32.5733	North Atlantic Ocean	100.1	epipelagic	736135	14.7227	55285.1	2.25285	791420	16.9755	0.0751018	0.153019	22.681	37.406	0.02	0.02	0.05	0.69
Atlantic Meridional Transect Project (AMT 12)i	26.4607	-30.1621	North Atlantic Ocean	8.2	surface	686860	13.7372	54715.7	2.28614	741575	16.0233	0.0796607	0.16642	23.054	37.356	0.02	0.02	0.07	0.79
Atlantic Meridional Transect Project (AMT 12)i	26.4607	-30.1621	North Atlantic Ocean	20.9	epipelagic	693161	13.8632	55796.7	2.42773	748958	16.291	0.080496	0.17512	22.712	37.339	0.02	0.02	0.09	0.78
Atlantic Meridional Transect Project (AMT 12)i	26.4607	-30.1621	North Atlantic Ocean	36.6	epipelagic	772642	15.4528	61882.9	2.69012	834525	18.143	0.0800926	0.174086	22.236	37.29	0.02	0.02	0.08	0.77
Atlantic Meridional Transect Project (AMT 12)i	26.4607	-30.1621	North Atlantic Ocean	66.5	epipelagic	804417	16.0883	63993.9	2.72582	868411	18.8142	0.0795532	0.169428	22.044	37.28	0.02	0.02	0.07	0.78
Atlantic Meridional Transect Project (AMT 12)i	12.2354	-32.2862	North Atlantic Ocean	1.7	surface	1.20346e+06	24.0692	97793.4	4.4646	1.30126e+06	28.5338	0.0812601	0.18549	25.995	36.241	0.02	0.02	-	0.71
Atlantic Meridional Transect Project (AMT 12)i	12.2354	-32.2862	North Atlantic Ocean	9.1	surface	1.3894e+06	27.7879	112328	4.95794	1.50172e+06	32.7459	0.0808463	0.178421	25.971	36.24	0.02	0.02	-	0.69
Atlantic Meridional Transect Project (AMT 12)i	12.2354	-32.2862	North Atlantic Ocean	23.9	epipelagic	1.19827e+06	23.9655	96557.3	4.40872	1.29483e+06	28.3742	0.0805803	0.183961	25.884	36.237	0.02	0.02	-	0.69
Atlantic Meridional Transect Project (AMT 12)i	12.2354	-32.2862	North Atlantic Ocean	48.7	epipelagic	1.29751e+06	25.9502	106200	5.09827	1.40371e+06	31.0484	0.0818495	0.196464	25.831	36.227	0.02	0.02	0.07	0.72
Atlantic Meridional Transect Project (AMT 12)i	12.2354	-32.2862	North Atlantic Ocean	68.7	epipelagic	1.33735e+06	26.747	137251	7.04993	1.4746e+06	33.7969	0.102629	0.263578	23.84	36.112	1.64	0.05	0.13	1.38
Atlantic Meridional Transect Project (AMT 12)i	12.2354	-32.2862	North Atlantic Ocean	99	epipelagic	465720	9.31441	6110.46	0.156981	471831	9.47139	0.0131204	0.0168535	15.494	35.62	22.2	0.14	1.23	6.13
Atlantic Meridional Transect Project (AMT 12)i	15.4484	-34.2305	North Atlantic Ocean	1.7	surface	1.28378e+06	25.6756	98767.4	4.17037	1.38255e+06	29.8459	0.0769349	0.162426	24.591	36.731	0.02	0.02	0.07	0.65
Atlantic Meridional Transect Project (AMT 12)i	15.4484	-34.2305	North Atlantic Ocean	10.5	surface	1.27343e+06	25.4685	97704.1	4.10223	1.37113e+06	29.5708	0.0767253	0.16107	24.569	36.731	0.02	0.02	0.06	0.66
Atlantic Meridional Transect Project (AMT 12)i	15.4484	-34.2305	North Atlantic Ocean	25.7	epipelagic	1291071	25.8214	100067	4.40665	1.39114e+06	30.2281	0.0775067	0.170659	24.473	36.757	0.02	0.02	0.04	0.64
Atlantic Meridional Transect Project (AMT 12)i	15.4484	-34.2305	North Atlantic Ocean	50.3	epipelagic	1.28405e+06	25.6811	99720.3	4.30813	1.38377e+06	29.9892	0.0776605	0.167755	24.003	36.795	0.02	0.02	0.04	0.64
Atlantic Meridional Transect Project (AMT 12)i	15.4484	-34.2305	North Atlantic Ocean	75.6	epipelagic	1.28894e+06	25.7788	99606.1	4.13642	1.38855e+06	29.9153	0.0772774	0.160458	23.581	36.804	0.02	0.02	0.03	0.63
Atlantic Meridional Transect Project (AMT 12)i	15.4484	-34.2305	North Atlantic Ocean	100.7	epipelagic	1068717	21.3743	103227	3.93709	1.17194e+06	25.3114	0.09659	0.184197	22.897	36.75	0.02	0.02	0.03	0.71
Atlantic Meridional Transect Project (AMT 12)i	18.0365	-35.8293	North Atlantic Ocean	7.3	surface	898267	17.9653	15981.6	1.10835	914248	19.0737	0.0177916	0.0616937	24.672	36.715	0.02	0.02	-	0.72
Atlantic Meridional Transect Project (AMT 12)i	18.0365	-35.8293	North Atlantic Ocean	12.4	epipelagic	928776	18.5755	14455.6	1.0391	943232	19.6146	0.0155641	0.0559392	24.669	36.715	0.02	0.02	-	0.65
Atlantic Meridional Transect Project (AMT 12)i	18.0365	-35.8293	North Atlantic Ocean	24.1	epipelagic	909142	18.1828	14711.2	1.0295	923853	19.2123	0.0161814	0.0566193	24.667	36.716	0.02	0.02	-	0.65
Atlantic Meridional Transect Project (AMT 12)i	18.0365	-35.8293	North Atlantic Ocean	41.9	epipelagic	973168	19.4634	15924.2	1.16484	989092	20.6282	0.0163633	0.0598478	24.369	36.903	0.02	0.02	0.05	0.63
Atlantic Meridional Transect Project (AMT 12)i	18.0365	-35.8293	North Atlantic Ocean	90	epipelagic	860598	17.212	17274.5	1.03865	877872	18.2506	0.0200727	0.0603449	22.982	37.128	0.02	0.02	0.02	0.57
Atlantic Meridional Transect Project (AMT 12)i	18.0365	-35.8293	North Atlantic Ocean	99.9	epipelagic	654117	13.0823	20599.3	0.74386	674716	13.8262	0.0314918	0.0568598	22.588	37.116	0.03	0.02	0.02	0.6
Atlantic Meridional Transect Project (AMT 12)i	19.0508	-36.4555	North Atlantic Ocean	2.5	surface	813987	16.2797	66099.9	2.8379	880087	19.1177	0.0812051	0.174321	24.695	36.79	0.02	0.02	0.1	0.8
Atlantic Meridional Transect Project (AMT 12)i	19.0508	-36.4555	North Atlantic Ocean	9.9	surface	893831	17.8766	72006	3.02729	965837	20.9039	0.0805589	0.169343	24.687	36.79	0.02	0.02	0.11	0.83
Atlantic Meridional Transect Project (AMT 12)i	19.0508	-36.4555	North Atlantic Ocean	24.9	epipelagic	944385	18.8877	76154.1	3.14492	1.02054e+06	22.0326	0.0806388	0.166506	24.66	36.79	0.02	0.02	0.11	0.8
Atlantic Meridional Transect Project (AMT 12)i	19.0508	-36.4555	North Atlantic Ocean	49.8	epipelagic	1171223	23.4245	93049.5	3.74044	1.26427e+06	27.1649	0.0794464	0.159681	24.144	37.092	0.02	0.02	0.11	0.71
Atlantic Meridional Transect Project (AMT 12)i	19.0508	-36.4555	North Atlantic Ocean	74.9	epipelagic	985579	19.7116	78596.5	3.30038	1.06418e+06	23.012	0.0797465	0.167433	23.267	37.068	0.02	0.02	0.1	0.71
Atlantic Meridional Transect Project (AMT 12)i	19.0508	-36.4555	South Atlantic Ocean	99.8	epipelagic	863275	17.2655	66781.9	2.63304	930057	19.8985	0.0773587	0.152503	23.154	37.231	0.02	0.02	0.1	0.74
Atlantic Meridional Transect Project (AMT 12)i	12.2343	-32.2863	South Atlantic Ocean	7.5	surface	1.40891e+06	28.1781	114818	5.17966	1.52372e+06	33.3578	0.0814945	0.183818	25.877	36.243	0.02	0.02	-	0.75
Atlantic Meridional Transect Project (AMT 12)i	12.2343	-32.2863	South Atlantic Ocean	15	epipelagic	1.44327e+06	28.8655	118440	5.34932	1.56171e+06	34.2148	0.0820636	0.185319	25.878	36.243	0.02	0.02	0.25	0.77
Atlantic Meridional Transect Project (AMT 12)i	12.2343	-32.2863	South Atlantic Ocean	27.1	epipelagic	1.45548e+06	29.1095	121218	5.20987	1.57669e+06	34.3194	0.0832841	0.178975	25.877	36.244	0.02	0.05	0.23	0.77
Atlantic Meridional Transect Project (AMT 12)i	12.2343	-32.2863	North Atlantic Ocean	48.7	epipelagic	1.71417e+06	34.2835	143329	6.57899	1.8575e+06	40.8625	0.0836139	0.1919	25.839	36.234	0.42	-	0.24	0.91
Atlantic Meridional Transect Project (AMT 12)i	12.2343	-32.2863	North Atlantic Ocean	64.5	epipelagic	1.03345e+06	20.6691	40156.4	1.36423	1.07361e+06	22.0333	0.0388565	0.0660036	20.832	35.886	8.83	-	0.7	3.13
Atlantic Meridional Transect Project (AMT 12)i	12.2343	-32.2863	North Atlantic Ocean	73.7	epipelagic	1.46341e+06	29.2682	13685.9	0.286265	1.4771e+06	29.5545	0.00935207	0.00978073	18.741	35.83	14.67	-	1.06	4.2
Atlantic Meridional Transect Project (AMT 12)i	12.2343	-32.2863	North Atlantic Ocean	97	epipelagic	466610	9.3322	2351.78	0.0718539	468962	9.40405	0.00504015	0.00769956	14.739	35.616	24.93	0.02	1.64	7.47
Atlantic Meridional Transect Project (AMT 12)i	2.2113	-26.3066	North Atlantic Ocean	0.9	surface	1.33245e+06	26.649	109891	5.23966	1.44234e+06	31.8887	0.082473	0.196617	28.56	35.298	0.02	0.02	-	0.23
Atlantic Meridional Transect Project (AMT 12)i	2.2113	-26.3066	North Atlantic Ocean	9.2	surface	1451137	29.0227	119580	5.6654	1.57072e+06	34.6881	0.0824044	0.195205	28.51	35.296	0.02	0.02	-	0.2
Atlantic Meridional Transect Project (AMT 12)i	2.2113	-26.3066	North Atlantic Ocean	23.5	epipelagic	1.42931e+06	28.5862	118073	5.67222	1.54738e+06	34.2584	0.0826085	0.198425	28.237	35.393	0.02	0.02	0.12	0.18
Atlantic Meridional Transect Project (AMT 12)i	2.2113	-26.3066	North Atlantic Ocean	48.6	epipelagic	1495969	29.9194	126272	6.51842	1.62224e+06	36.4378	0.084408	0.217866	27.762	35.523	0.02	0.02	0.11	0.22
Atlantic Meridional Transect Project (AMT 12)i	2.2113	-26.3066	North Atlantic Ocean	62.7	epipelagic	1.02095e+06	20.4191	10646.4	0.888955	1.0316e+06	21.308	0.0104279	0.0435355	24.584	35.772	1.46	0.18	0.32	1.3
Atlantic Meridional Transect Project (AMT 12)i	2.2113	-26.3066	North Atlantic Ocean	99.2	epipelagic	447998	8.95995	2264.96	0.108152	450263	9.0681	0.00505574	0.0120706	15.963	35.608	22.56	0.03	1.43	6.1
Atlantic Meridional Transect Project (AMT 12)i	5.9161	-28.4838	North Atlantic Ocean	1.5	surface	2.05214e+06	41.0428	180117	10.9646	2.23226e+06	52.0074	0.0877702	0.267151	28.307	35.663	0.02	0.02	0.05	1.19
Atlantic Meridional Transect Project (AMT 12)i	5.9161	-28.4838	North Atlantic Ocean	9.9	surface	2.0938e+06	41.8761	176033	9.48504	2.26984e+06	51.3611	0.0840734	0.226503	28.308	35.659	0.02	0.02	0.07	1.17
Atlantic Meridional Transect Project (AMT 12)i	5.9161	-28.4838	North Atlantic Ocean	24.7	epipelagic	540719	10.8144	41353.9	1.48874	582072	12.3031	0.0764794	0.137663	28.273	35.832	0.02	0.02	0.08	1.15
Atlantic Meridional Transect Project (AMT 12)i	5.9161	-28.4838	North Atlantic Ocean	49.2	epipelagic	1.8839e+06	37.6779	183583	11.8738	2.06748e+06	49.5517	0.0974485	0.315139	27.655	35.846	0.05	0.02	0.09	1.58
Atlantic Meridional Transect Project (AMT 12)i	5.9161	-28.4838	North Atlantic Ocean	65.5	epipelagic	1.65106e+06	33.0212	20003.6	2.21137	1.67107e+06	35.2326	0.0121156	0.0669682	23.212	35.93	1.24	0.21	0.18	2.68
Atlantic Meridional Transect Project (AMT 12)i	5.9161	-28.4838	North Atlantic Ocean	99.5	epipelagic	535438	10.7088	1388.79	0.0784179	536827	10.7872	0.00259374	0.00732277	16.48	35.645	18.85	0.04	1.1	6.96
Atlantic Meridional Transect Project (AMT 12)i	9.5632	-30.6772	North Atlantic Ocean	0.8	surface	1223028	24.4606	100668	4.64883	1.3237e+06	29.1094	0.0823105	0.190054	26.988	36.299	0.02	0.02	0.19	1.17
Atlantic Meridional Transect Project (AMT 12)i	9.5632	-30.6772	North Atlantic Ocean	10.1	surface	1.39014e+06	27.8028	125670	5.52677	1.51581e+06	33.3295	0.0904009	0.198785	26.973	36.298	0.02	0.02	0.1	1.12
Atlantic Meridional Transect Project (AMT 12)i	9.5632	-30.6772	North Atlantic Ocean	24.5	epipelagic	1.2381e+06	24.7621	107094	4.82761	1.3452e+06	29.5897	0.0864986	0.19496	26.947	36.299	0.08	0.02	0.05	1.17
Atlantic Meridional Transect Project (AMT 12)i	9.5632	-30.6772	North Atlantic Ocean	49.8	epipelagic	1.36584e+06	27.3169	18424.5	1.26115	1.38427e+06	28.578	0.0134895	0.0461676	25.186	36.205	2.39	0.08	0.19	2.1
Atlantic Meridional Transect Project (AMT 12)i	9.5632	-30.6772	North Atlantic Ocean	59.1	epipelagic	863989	17.2798	15065	0.587779	879054	17.8676	0.0174366	0.0340154	22.395	36.038	11.23	0.28	0.66	4.11
Atlantic Meridional Transect Project (AMT 12)i	9.5632	-30.6772	North Atlantic Ocean	99.9	epipelagic	295726	5.91451	1499.64	0.0564093	297225	5.97092	0.00507105	0.00953743	14.407	35.467	25.76	0.07	1.5	8.5
Atlantic Meridional Transect Project (AMT 12)i	-5.3209	-24.996	South Atlantic Ocean	0.7	surface	1.63799e+06	32.7598	132336	6.36295	1.77032e+06	39.1227	0.0807921	0.194231	28.059	35.9	-	-	-	-
Atlantic Meridional Transect Project (AMT 12)i	-5.3209	-24.996	South Atlantic Ocean	9.9	surface	1.83754e+06	36.7508	148131	7.50636	1.98567e+06	44.2572	0.0806135	0.20425	28.039	35.899	0.02	0.02	-	1.17
Atlantic Meridional Transect Project (AMT 12)i	-5.3209	-24.996	South Atlantic Ocean	24.5	epipelagic	1.74926e+06	34.9852	145345	7.56294	1.89461e+06	42.5482	0.0830893	0.216175	28.034	35.963	0.02	0.02	0.19	1.21
Atlantic Meridional Transect Project (AMT 12)i	-5.3209	-24.996	South Atlantic Ocean	50.2	epipelagic	1.58166e+06	31.6332	129667	6.51324	1.71133e+06	38.1465	0.0819814	0.205899	27.977	36.058	0.05	0.02	0.17	1.22
Atlantic Meridional Transect Project (AMT 12)i	-5.3209	-24.996	South Atlantic Ocean	74.6	epipelagic	1.29626e+06	25.9252	118885	5.78655	1.41515e+06	31.7118	0.0917136	0.223202	27.904	36.081	0.08	0.02	0.19	1.34
Atlantic Meridional Transect Project (AMT 12)i	-5.3209	-24.996	South Atlantic Ocean	83.8	epipelagic	1.16572e+06	23.3145	12128.8	1.25301	1.17785e+06	24.5675	0.0104045	0.0537439	27.809	36.087	1.27	0.11	0.33	1.9
Atlantic Meridional Transect Project (AMT 12)i	1.0867	-25.6463	North Atlantic Ocean	5.6	surface	1.501e+06	30.02	135883	8.24809	1.63688e+06	38.2681	0.090528	0.274753	27.367	35.76	0.02	0.02	-	1.03
Atlantic Meridional Transect Project (AMT 12)i	1.0867	-25.6463	North Atlantic Ocean	12	epipelagic	1.37229e+06	27.4457	126295	8.04228	1.49858e+06	35.488	0.0920326	0.293025	27.368	35.761	0.02	0.02	0.12	1.25
Atlantic Meridional Transect Project (AMT 12)i	1.0867	-25.6463	North Atlantic Ocean	20.4	epipelagic	1.55535e+06	31.1069	134860	7.24877	1.69021e+06	38.3557	0.0867076	0.233027	27.37	35.76	0.02	0.02	0.11	1.37
Atlantic Meridional Transect Project (AMT 12)i	1.0867	-25.6463	North Atlantic Ocean	37.3	epipelagic	1.27884e+06	25.5769	113977	6.77512	1.39282e+06	32.352	0.0891254	0.264893	26.991	36.024	0.08	0.02	0.13	1.56
Atlantic Meridional Transect Project (AMT 12)i	1.0867	-25.6463	North Atlantic Ocean	55.8	epipelagic	1.21521e+06	24.3042	107835	5.80897	1.32305e+06	30.1132	0.0887374	0.239011	26.725	36.285	3.59	0.02	0.35	2.81
Atlantic Meridional Transect Project (AMT 12)i	1.0867	-25.6463	North Atlantic Ocean	68.7	epipelagic	917084	18.3417	28087.3	1.58732	945171	19.929	0.0306268	0.0865419	24.256	36.1	22.41	0.02	0.45	7.54
Atlantic Meridional Transect Project (AMT 12)i	1.0867	-25.6463	North Atlantic Ocean	72	epipelagic	907110	18.1422	23554.9	1.40134	930665	19.5435	0.025967	0.0772418	23.221	36.043	-	-	-	-
Atlantic Meridional Transect Project (AMT 12)i	1.0867	-25.6463	North Atlantic Ocean	100	epipelagic	311788	6.23576	846.705	0.0526645	312635	6.28842	0.00271564	0.00844556	15.139	35.559	23.87	0.02	1.28	8.2
Atlantic Meridional Transect Project (AMT 12)i	-16.5943	-24.9949	South Atlantic Ocean	0.7	surface	759944	15.1989	11416.4	0.492555	771360	15.6914	0.0150227	0.0324074	26.571	37.153	0.02	0.02	-	1.09
Atlantic Meridional Transect Project (AMT 12)i	-16.5943	-24.9949	South Atlantic Ocean	11.3	epipelagic	743508	14.8702	10306.3	0.43182	753814	15.302	0.0138617	0.0290394	26.573	37.154	0.02	0.02	-	1.09
Atlantic Meridional Transect Project (AMT 12)i	-16.5943	-24.9949	South Atlantic Ocean	26.3	epipelagic	790706	15.8141	13069.6	0.560341	803776	16.3745	0.016529	0.035433	26.54	37.151	0.02	0.02	0.06	1.08
Atlantic Meridional Transect Project (AMT 12)i	-16.5943	-24.9949	South Atlantic Ocean	50.6	epipelagic	887546	17.7509	14236.2	0.654686	901783	18.4056	0.0160399	0.0368818	26.528	37.152	0.02	0.02	0.06	1.05
Atlantic Meridional Transect Project (AMT 12)i	-16.5943	-24.9949	South Atlantic Ocean	75.5	epipelagic	673399	13.468	10094.1	0.451011	683493	13.919	0.0149898	0.0334876	24.481	36.843	0.02	0.02	0.05	1.09
Atlantic Meridional Transect Project (AMT 12)i	-16.5943	-24.9949	South Atlantic Ocean	90.8	epipelagic	346001	6.92002	6005.2	0.19754	352006	7.11756	0.017356	0.0285462	23.145	36.774	0.02	0.02	0.05	1.07
Atlantic Meridional Transect Project (AMT 12)i	-13.9263	-24.9975	South Atlantic Ocean	6.9	surface	841685	16.8337	13196	0.53186	854881	17.3656	0.015678	0.031595	26.995	36.921	0.02	-	-	0.99
Atlantic Meridional Transect Project (AMT 12)i	-13.9263	-24.9975	South Atlantic Ocean	18.1	epipelagic	778731	15.5746	11674	0.479567	790405	16.0542	0.014991	0.0307916	26.996	36.921	0.02	-	-	0.99
Atlantic Meridional Transect Project (AMT 12)i	-13.9263	-24.9975	South Atlantic Ocean	31.3	epipelagic	804340	16.0868	12477.6	0.516774	816818	16.6036	0.0155129	0.0321241	26.994	36.921	0.02	-	-	1
Atlantic Meridional Transect Project (AMT 12)i	-13.9263	-24.9975	South Atlantic Ocean	55.3	epipelagic	825132	16.5026	13053.6	0.552599	838185	17.0552	0.01582	0.0334855	26.992	36.921	0.02	-	0.18	0.98
Atlantic Meridional Transect Project (AMT 12)i	-13.9262	-24.9973	South Atlantic Ocean	1.2	surface	783196	15.6639	58533.2	2.14592	841730	17.8098	0.0747363	0.136997	24.163	27.002	0.02	0.02	-	1.24
Atlantic Meridional Transect Project (AMT 12)i	-13.9262	-24.9973	South Atlantic Ocean	9	surface	807249	16.145	60344	2.22393	867593	18.3689	0.0747527	0.137748	24.162	27.01	0.02	0.02	-	1.26
Atlantic Meridional Transect Project (AMT 12)i	-13.9262	-24.9973	South Atlantic Ocean	24.2	epipelagic	778722	15.5744	57938	2.12636	836660	17.7008	0.0744015	0.136529	24.167	26.994	0.02	0.02	-	1.22
Atlantic Meridional Transect Project (AMT 12)i	-13.9262	-24.9973	South Atlantic Ocean	49.1	epipelagic	716340	14.3268	53561.3	1.98873	769902	16.3155	0.0747708	0.138812	24.169	26.995	0.02	0.02	0.14	1.19
Atlantic Meridional Transect Project (AMT 12)i	-13.9262	-24.9973	South Atlantic Ocean	74.4	epipelagic	874204	17.4841	65364.8	2.43164	939568	19.9157	0.0747706	0.139077	24.177	26.979	0.02	0.02	0.14	1.21
Atlantic Meridional Transect Project (AMT 12)i	-13.9262	-24.9973	South Atlantic Ocean	99.6	epipelagic	587652	11.753	10575	0.548904	598227	12.302	0.0179953	0.0467031	24.942	24.311	0.05	0.02	0.18	1.38
Atlantic Meridional Transect Project (AMT 12)i	-10.5969	-24.9972	South Atlantic Ocean	7.2	surface	1.22926e+06	24.5852	19362.6	0.837214	1.24862e+06	25.4224	0.0157514	0.0340535	27.285	36.65	0.02	0.02	-	1.1
Atlantic Meridional Transect Project (AMT 12)i	-10.5969	-24.9972	South Atlantic Ocean	15.8	epipelagic	1.24476e+06	24.8952	20334.4	0.852027	1.26509e+06	25.7472	0.016336	0.0342246	27.285	36.651	0.02	0.02	-	1.12
Atlantic Meridional Transect Project (AMT 12)i	-10.5969	-24.9972	South Atlantic Ocean	27.5	epipelagic	1.28952e+06	25.7903	18002.3	0.785139	1.30752e+06	26.5754	0.0139605	0.0304432	27.285	36.652	0.02	0.02	-	1.12
Atlantic Meridional Transect Project (AMT 12)i	-10.5969	-24.9972	South Atlantic Ocean	48	epipelagic	1.2981e+06	25.962	18366.8	0.788217	1.31647e+06	26.7502	0.014149	0.0303604	27.28	36.654	0.02	0.02	0.08	1.12
Atlantic Meridional Transect Project (AMT 12)i	-10.5969	-24.9972	South Atlantic Ocean	79.2	epipelagic	1.37661e+06	27.5321	25403.6	1.16586	1.40201e+06	28.698	0.0184538	0.0423454	25.493	36.674	0.02	0.02	0.08	1.2
Atlantic Meridional Transect Project (AMT 12)i	-10.5969	-24.9972	South Atlantic Ocean	100.2	epipelagic	905310	18.1062	20519.2	0.923068	925829	19.0293	0.0226654	0.0509808	23.841	36.855	0.03	0.02	0.08	1.2
Atlantic Meridional Transect Project (AMT 12)i	-6.453	-24.9978	South Atlantic Ocean	5.1	surface	1.9933e+06	39.8661	171350	8.57318	2.16465e+06	48.4392	0.0859629	0.21505	28.098	35.803	0.02	0.02	-	1.1
Atlantic Meridional Transect Project (AMT 12)i	-6.453	-24.9978	South Atlantic Ocean	9.8	surface	2.24932e+06	44.9863	193977	9.75889	2.44329e+06	54.7452	0.0862381	0.21693	28.083	35.803	0.02	0.02	-	1.09
Atlantic Meridional Transect Project (AMT 12)i	-6.453	-24.9978	South Atlantic Ocean	19.6	epipelagic	1.69531e+06	33.9062	147909	7.99983	1.84322e+06	41.906	0.087246	0.23594	28.072	35.804	0.02	0.02	-	1.11
Atlantic Meridional Transect Project (AMT 12)i	-6.453	-24.9978	South Atlantic Ocean	34.2	epipelagic	1.83341e+06	36.6683	161557	8.90757	1.99497e+06	45.5758	0.088118	0.242923	28.072	35.809	0.02	0.02	0.07	1.09
Atlantic Meridional Transect Project (AMT 12)i	-6.453	-24.9978	South Atlantic Ocean	59.7	epipelagic	1.55409e+06	31.0819	131329	6.40555	1.68542e+06	37.4874	0.0845048	0.206086	28.035	35.854	0.02	0.02	0.06	1.09
Atlantic Meridional Transect Project (AMT 12)i	-6.453	-24.9978	South Atlantic Ocean	76.1	epipelagic	1.22967e+06	24.5934	117626	5.10787	1.3473e+06	29.7013	0.0956564	0.207693	28.001	36.288	0.02	0.02	0.06	0.99
Atlantic Meridional Transect Project (AMT 12)i	-6.453	-24.9978	South Atlantic Ocean	101	epipelagic	768222	15.3644	4668.4	0.187656	772891	15.5521	0.00607689	0.0122136	22.903	36.452	0.51	0.09	0.18	1.44
Atlantic Meridional Transect Project (AMT 12)i	-2.2361	-24.9991	South Atlantic Ocean	4.1	surface	1.23146e+06	24.6291	110704	6.35778	1.34216e+06	30.9869	0.0898964	0.258141	27.343	36.104	0.02	0.02	-	1.31
Atlantic Meridional Transect Project (AMT 12)i	-2.2361	-24.9991	South Atlantic Ocean	8.9	surface	1.2613e+06	25.226	113382	6.51549	1.37468e+06	31.7415	0.089893	0.258285	27.346	36.104	0.02	0.02	-	1.27
Atlantic Meridional Transect Project (AMT 12)i	-2.2361	-24.9991	South Atlantic Ocean	19.4	epipelagic	1.15778e+06	23.1555	105368	6.26393	1.26314e+06	29.4194	0.0910089	0.270516	27.238	36.124	0.02	0.02	0.15	1.28
Atlantic Meridional Transect Project (AMT 12)i	-2.2361	-24.9991	South Atlantic Ocean	47.9	epipelagic	1.07251e+06	21.4503	95214.7	4.60426	1.16773e+06	26.0545	0.0887771	0.214648	25.654	36.336	0.84	0.03	0.25	1.95
Atlantic Meridional Transect Project (AMT 12)i	-2.2361	-24.9991	South Atlantic Ocean	65	epipelagic	1.12373e+06	22.4746	25441.4	2.82946	1.14917e+06	25.304	0.0226401	0.125896	19.543	35.744	5.81	0.12	0.57	3.73
Atlantic Meridional Transect Project (AMT 12)i	-2.2361	-24.9991	South Atlantic Ocean	88.8	epipelagic	460967	9.21934	4744.57	0.196164	465712	9.41551	0.0102926	0.0212774	16.199	35.578	20.78	0.07	1.3	6.57
Atlantic Meridional Transect Project (AMT 12)i	-2.2361	-24.9991	South Atlantic Ocean	0.6	surface	1209633	24.1927	108760	5.97838	1.31839e+06	30.171	0.0899115	0.247116	27.323	36.113	0.02	0.02	-	1.54
Atlantic Meridional Transect Project (AMT 12)i	-2.2361	-24.9991	South Atlantic Ocean	8	surface	1.1148e+06	22.296	98267.1	5.06678	1.21307e+06	27.3628	0.0881478	0.227251	27.267	36.116	0.02	0.02	-	1.53
Atlantic Meridional Transect Project (AMT 12)i	-2.2361	-24.9991	South Atlantic Ocean	23.6	epipelagic	988363	19.7673	85583.9	4.1324	1.07395e+06	23.8997	0.0865915	0.209053	26.866	36.191	0.02	0.02	0.17	1.57
Atlantic Meridional Transect Project (AMT 12)i	-2.2361	-24.9991	South Atlantic Ocean	48.3	epipelagic	851408	17.0282	81922.8	3.76144	933330	20.7896	0.0962204	0.220896	25.633	36.339	0.03	0.02	0.19	1.82
Atlantic Meridional Transect Project (AMT 12)i	-2.2361	-24.9991	South Atlantic Ocean	54.2	epipelagic	1.04871e+06	20.9741	105428	5.28021	1.15414e+06	26.2543	0.100532	0.251749	25.331	36.31	2.04	0.06	0.38	2.89
Atlantic Meridional Transect Project (AMT 12)i	-2.2361	-24.9991	South Atlantic Ocean	98.4	epipelagic	434255	8.68509	1965.76	0.103895	436220	8.78899	0.00452673	0.0119625	15.892	35.558	22.04	0.03	1.38	8.55
Atlantic Meridional Transect Project (AMT 12)i	14.4251	-33.6073	North Atlantic Ocean	12.4	epipelagic	994643	19.8929	76472.7	3.23028	1.07112e+06	23.1231	0.0768846	0.162384	24.822	36.464	0.02	0.02	-	0.65
Atlantic Meridional Transect Project (AMT 12)i	14.4251	-33.6073	North Atlantic Ocean	23.3	epipelagic	985377	19.7075	75711.9	3.22985	1.06109e+06	22.9374	0.0768355	0.163889	24.819	36.464	0.02	0.02	-	0.64
Atlantic Meridional Transect Project (AMT 12)i	14.4251	-33.6073	North Atlantic Ocean	41.1	epipelagic	1.06947e+06	21.3894	81295.3	3.4848	1.15077e+06	24.8742	0.0760145	0.162922	24.431	36.585	0.02	0.02	0.09	0.6
Atlantic Meridional Transect Project (AMT 12)i	14.4251	-33.6073	North Atlantic Ocean	88.9	epipelagic	770352	15.407	15461.4	0.47882	785813	15.8859	0.0200706	0.031078	22.565	36.875	0.38	0.07	0.09	0.89
Atlantic Meridional Transect Project (AMT 12)i	14.4251	-33.6073	North Atlantic Ocean	99.8	epipelagic	614989	12.2998	10008.3	0.30045	624998	12.6002	0.0162739	0.0244273	21.899	36.899	3.73	0.13	0.22	1.36
Atlantic Meridional Transect Project (AMT 12)i	21.414	-35.8022	North Atlantic Ocean	8.1	surface	863165	17.2633	66032.1	2.74626	929197	20.0096	0.0765	0.159081	24.042	37.05	0.02	0.02	0.07	0.8
Atlantic Meridional Transect Project (AMT 12)i	21.414	-35.8022	North Atlantic Ocean	20.1	epipelagic	808846	16.1769	62758.5	2.63291	871604	18.8098	0.0775902	0.162757	24.044	37.051	0.02	0.02	0.07	0.81
Atlantic Meridional Transect Project (AMT 12)i	21.414	-35.8022	North Atlantic Ocean	29.9	epipelagic	891780	17.8356	67392.6	2.74323	959173	20.5788	0.0755709	0.153806	24.043	37.054	0.02	0.02	0.07	0.8
Atlantic Meridional Transect Project (AMT 12)i	21.414	-35.8022	North Atlantic Ocean	53.1	epipelagic	943512	18.8702	71540.5	2.89794	1.01505e+06	21.7682	0.0758236	0.153572	23.506	37.194	0.02	0.02	0.05	0.78
Atlantic Meridional Transect Project (AMT 12)i	21.414	-35.8022	North Atlantic Ocean	101	epipelagic	919259	18.3852	13327.1	0.577256	932586	18.9624	0.0144976	0.0313979	22.889	37.318	0.02	0.02	0.04	0.8
Atlantic Meridional Transect Project (AMT 12)i	8.5325	-30.0579	North Atlantic Ocean	7.3	surface	1.28173e+06	25.6347	57360.2	3.19517	1.33909e+06	28.8299	0.044752	0.124643	27.294	36.303	0.02	0.02	-	1.11
Atlantic Meridional Transect Project (AMT 12)i	8.5325	-30.0579	North Atlantic Ocean	27.1	epipelagic	1.20296e+06	24.0592	97358.4	4.79421	1.30032e+06	28.8534	0.0809324	0.199267	27.283	36.303	0.02	0.02	0.04	1.05
Atlantic Meridional Transect Project (AMT 12)i	8.5325	-30.0579	North Atlantic Ocean	43.5	epipelagic	1.38729e+06	27.7458	25747.2	2.14089	1.41304e+06	29.8867	0.0185593	0.0771608	26.993	36.297	0.03	0.02	0.04	1.26
Atlantic Meridional Transect Project (AMT 12)i	8.5325	-30.0579	North Atlantic Ocean	56.1	epipelagic	1.2836e+06	25.672	25606.4	1.62935	1.30921e+06	27.3013	0.0199489	0.063468	23.782	36.056	1.66	0.07	0.15	2.03
Atlantic Meridional Transect Project (AMT 12)i	8.5325	-30.0579	North Atlantic Ocean	79.2	epipelagic	632278	12.6456	11592.6	0.249944	643870	12.8955	0.0183347	0.0197654	17.108	35.699	21.15	0.39	1.11	5.86
Atlantic Meridional Transect Project (AMT 12)i	8.5325	-30.0579	North Atlantic Ocean	96.7	epipelagic	513707	10.2741	4408.62	0.130711	518115	10.4048	0.00858198	0.0127223	15.062	35.531	26.35	0.1	1.46	7.58
Geochemistry, Phytoplankton & Color of the Ocean (Gep&CO)j	44.46	340.83	North Atlantic Ocean	5	surface	930061	18.6012	73129	5.30589	1003190	23.9071	0.0786282	0.285244	20.521	35.72	1.42	-	0.08	0.5
Geochemistry, Phytoplankton & Color of the Ocean (Gep&CO)j	43.99	337.2	North Atlantic Ocean	5	surface	881231	17.6246	49750	4.53844	930981	22.1631	0.0564551	0.257506	20.509	35.83	1.03	-	0.05	0.51
Geochemistry, Phytoplankton & Color of the Ocean (Gep&CO)j	43.75	335.39	North Atlantic Ocean	5	surface	828544	16.5709	56414	3.0124	884958	19.5833	0.0680881	0.181789	20.51	35.9	0.46	-	0.03	0.42
Geochemistry, Phytoplankton & Color of the Ocean (Gep&CO)j	43.17	331.05	North Atlantic Ocean	5	surface	815414	16.3083	92449	4.89282	907863	21.2011	0.113377	0.30002	20.604	36.02	0.48	-	0.02	0.49
Geochemistry, Phytoplankton & Color of the Ocean (Gep&CO)j	42.46	325.77	North Atlantic Ocean	5	surface	819662	16.3932	69635	4.10043	889297	20.4937	0.0849558	0.25013	20.448	35.06	0.65	-	0.02	0.08
Geochemistry, Phytoplankton & Color of the Ocean (Gep&CO)j	42.23	323.96	North Atlantic Ocean	5	surface	766451	15.329	148508	7.67635	914959	23.0054	0.193761	0.500773	20.362	35.96	0.47	-	0.02	0.05
Geochemistry, Phytoplankton & Color of the Ocean (Gep&CO)j	41.19	316.35	North Atlantic Ocean	5	surface	577764	11.5553	83549	4.31615	661313	15.8714	0.144607	0.373521	20.442	35.94	0.29	-	0.02	0
Geochemistry, Phytoplankton & Color of the Ocean (Gep&CO)j	40.99	314.49	North Atlantic Ocean	5	surface	795226	15.9045	149505	6.78659	944731	22.6911	0.188003	0.426708	20.178	36.05	1.5	-	0.02	0.9
Geochemistry, Phytoplankton & Color of the Ocean (Gep&CO)j	40.95	312.31	North Atlantic Ocean	5	surface	625165	12.5033	114337	5.46267	739502	17.966	0.182891	0.436898	20.145	35.79	0.53	-	0.02	0.1
Geochemistry, Phytoplankton & Color of the Ocean (Gep&CO)j	40.88	308.01	North Atlantic Ocean	5	surface	479312	9.58624	92813	4.71476	572125	14.301	0.193638	0.491826	20.665	36.4	0.65	-	0.05	0.53
Geochemistry, Phytoplankton & Color of the Ocean (Gep&CO)j	40.82	305.09	North Atlantic Ocean	5	surface	671442	13.4288	103684	6.00161	775126	19.4304	0.15442	0.446919	20.091	35.95	0.74	-	0.01	0.49
Geochemistry, Phytoplankton & Color of the Ocean (Gep&CO)j	40.8	303.45	North Atlantic Ocean	5	surface	494341	9.88682	93822	5.23173	588163	15.1186	0.189792	0.529162	20.109	36.23	0.63	-	0.02	0.7
Geochemistry, Phytoplankton & Color of the Ocean (Gep&CO)j	40.8	301.88	North Atlantic Ocean	5	surface	783470	15.6694	185053	10.677	968523	26.3464	0.236197	0.681393	20.01	35.05	0.62	-	0.03	0.2
Geochemistry, Phytoplankton & Color of the Ocean (Gep&CO)j	40.68	296.27	North Atlantic Ocean	5	surface	978437	19.5687	94985	8.80155	1073422	28.3703	0.0970783	0.449776	19.75	34.04	0.63	-	0.02	0.11
Geochemistry, Phytoplankton & Color of the Ocean (Gep&CO)j	40.64	294.57	North Atlantic Ocean	5	surface	629369	12.5874	144595	7.90136	773964	20.4887	0.229746	0.627721	20.329	36.06	0.58	-	0.01	0.37
Geochemistry, Phytoplankton & Color of the Ocean (Gep&CO)j	40.61	292.66	North Atlantic Ocean	5	surface	1020000	20.4	139258	10.9716	1159258	31.3716	0.136527	0.537826	19.805	34.22	0.53	-	0.02	0.16
Geochemistry, Phytoplankton & Color of the Ocean (Gep&CO)j	40.58	290.98	North Atlantic Ocean	5	surface	765220	15.3044	18189	2.76029	783409	18.0647	0.0237696	0.180359	19.621	32.65	0.59	-	0.2	0.12
Geochemistry, Phytoplankton & Color of the Ocean (Gep&CO)j	37.65	285.47	North Atlantic Ocean	5	surface	815833	16.3167	145915	19.1515	961748	35.4681	0.178854	1.17374	19.573	33.48	0.6	-	0.03	0.55
Geochemistry, Phytoplankton & Color of the Ocean (Gep&CO)j	36.86	284.17	North Atlantic Ocean	5	surface	1320000	26.4	45878	4.73089	1365878	31.1309	0.0347561	0.1792	18.255	28.54	0.63	-	0.31	1.18
Geochemistry, Phytoplankton & Color of the Ocean (Gep&CO)j	35.08	285.09	North Atlantic Ocean	5	surface	768268	15.3654	85066	7.34612	853334	22.7115	0.110724	0.478096	20.167	36.14	1.16	-	0.01	0.46
Geochemistry, Phytoplankton & Color of the Ocean (Gep&CO)j	34.33	284.01	North Atlantic Ocean	5	surface	698693	13.9739	89340	6.57624	788033	20.5501	0.127867	0.47061	20.113	36.14	0.6	-	0.01	0.64
Geochemistry, Phytoplankton & Color of the Ocean (Gep&CO)j	32.09	280.09	North Atlantic Ocean	5	surface	2930000	58.6	171913	18.6014	3101913	77.2014	0.0586734	0.31743	20.397	36.51	0.62	-	0.01	0.23
Geochemistry, Phytoplankton & Color of the Ocean (Gep&CO)j	31.96	279.32	North Atlantic Ocean	5	surface	2400000	48	317037	45.3393	2717037	93.3393	0.132099	0.944569	20.286	36.3	0.66	-	0.12	0.05
Geochemistry, Phytoplankton & Color of the Ocean (Gep&CO)j	31.1	280.06	North Atlantic Ocean	5	surface	661831	13.2366	103069	11.0561	764900	24.2927	0.155733	0.835263	20.186	36.31	1.88	-	0.02	1.25
Geochemistry, Phytoplankton & Color of the Ocean (Gep&CO)j	21.81	285.88	North Atlantic Ocean	5	surface	316846	6.33692	41611	3.03277	358457	9.36969	0.131329	0.478587	20.232	36.58	0.57	-	0	0.74
Geochemistry, Phytoplankton & Color of the Ocean (Gep&CO)j	18.74	285.27	North Atlantic Ocean	5	surface	334688	6.69376	70218	3.45704	404906	10.1508	0.209801	0.516458	20.104	36.37	0.63	-	0	0.94
Geochemistry, Phytoplankton & Color of the Ocean (Gep&CO)j	17.78	284.72	North Atlantic Ocean	5	surface	433224	8.66448	208249	8.32397	641473	16.9885	0.480696	0.960701	20.04	36.18	0.39	-	0	0.46
Geochemistry, Phytoplankton & Color of the Ocean (Gep&CO)j	16.6	284.05	North Atlantic Ocean	5	surface	428990	8.5798	171603	6.83711	600593	15.4169	0.400016	0.796885	20	36.22	0.58	-	0	0.58
Geochemistry, Phytoplankton & Color of the Ocean (Gep&CO)j	15.41	283.39	North Atlantic Ocean	5	surface	349951	6.99902	149158	5.86479	499109	12.8638	0.426225	0.837945	19.992	36.18	0.36	-	0	0.71
Geochemistry, Phytoplankton & Color of the Ocean (Gep&CO)j	14.03	282.76	North Atlantic Ocean	5	surface	366777	7.33554	202602	7.73056	569379	15.0661	0.552385	1.05385	20.233	36.19	0.4	-	0	0.54
Geochemistry, Phytoplankton & Color of the Ocean (Gep&CO)j	11.79	281.39	North Atlantic Ocean	5	surface	403464	8.06928	104408	5.51043	507872	13.5797	0.258779	0.682889	20.069	36.1	0.39	-	0	0.99
Geochemistry, Phytoplankton & Color of the Ocean (Gep&CO)j	10.57	280.72	North Pacific Ocean	5	surface	361282	7.22564	84998	5.62259	446280	12.8482	0.235268	0.778144	19.781	35.78	0.42	-	0	0.84
Geochemistry, Phytoplankton & Color of the Ocean (Gep&CO)j	9.5	280.13	North Pacific Ocean	5	surface	551422	11.0284	151252	34.0996	702674	45.1281	0.274294	3.09197	18.843	33.28	0.48	-	0	9.06
Geochemistry, Phytoplankton & Color of the Ocean (Gep&CO)j	8.18	280.34	North Pacific Ocean	5	surface	781334	15.6267	283174	36.9164	1064508	52.5431	0.362424	2.3624	17.003	29.47	0.4	-	0.05	3.11
Geochemistry, Phytoplankton & Color of the Ocean (Gep&CO)j	7	279.98	North Pacific Ocean	5	surface	687531	13.7506	238592	19.8819	926123	33.6325	0.347027	1.44589	17.365	30.23	0.56	-	0.03	1.66
Geochemistry, Phytoplankton & Color of the Ocean (Gep&CO)j	6.09	277.44	North Pacific Ocean	5	surface	722321	14.4464	268664	19.6876	990985	34.134	0.371945	1.3628	18.553	32.8	0.43	-	0.12	0.67
Geochemistry, Phytoplankton & Color of the Ocean (Gep&CO)j	5.64	276.17	North Pacific Ocean	5	surface	607891	12.1578	199493	14.7578	807384	26.9156	0.328172	1.21385	18.709	33.07	0.49	-	0.13	0.53
Geochemistry, Phytoplankton & Color of the Ocean (Gep&CO)j	5.22	275	North Pacific Ocean	5	surface	503273	10.0655	183675	16.8898	686948	26.9553	0.364961	1.678	18.671	33.09	0.27	-	0.11	0
Geochemistry, Phytoplankton & Color of the Ocean (Gep&CO)j	4.77	273.75	North Pacific Ocean	5	surface	552716	11.0543	194613	14.2808	747329	25.3352	0.352103	1.29188	18.633	33.01	0.2	-	0.05	0
Geochemistry, Phytoplankton & Color of the Ocean (Gep&CO)j	4.35	272.57	North Pacific Ocean	5	surface	435013	8.70026	218261	13.1702	653274	21.8705	0.501734	1.51377	18.817	33.23	0.72	-	0.1	0.09
Geochemistry, Phytoplankton & Color of the Ocean (Gep&CO)j	3.31	269.65	North Pacific Ocean	5	surface	723965	14.4793	130933	8.97525	854898	23.4545	0.180855	0.619868	19.361	33.96	1.01	-	0.14	0.23
Geochemistry, Phytoplankton & Color of the Ocean (Gep&CO)j	2.87	268.42	North Pacific Ocean	5	surface	692142	13.8428	100885	6.6077	793027	20.4505	0.145758	0.477337	19.408	34	1.37	-	0.21	0.14
Geochemistry, Phytoplankton & Color of the Ocean (Gep&CO)j	2.36	267	North Pacific Ocean	5	surface	770484	15.4097	128130	9.20533	898614	24.615	0.166298	0.597373	19.495	34.15	1.94	-	0.21	0.62
Geochemistry, Phytoplankton & Color of the Ocean (Gep&CO)j	1.39	265.68	North Pacific Ocean	5	surface	835136	16.7027	205398	16.5378	1040534	33.2405	0.245946	0.990126	19.522	34.16	1.54	-	0.16	0.14
Geochemistry, Phytoplankton & Color of the Ocean (Gep&CO)j	1.44	264.6	North Pacific Ocean	5	surface	755282	15.1056	128918	10.3278	884200	25.4335	0.170689	0.683707	19.417	33.99	2.57	-	0.26	0.75
Geochemistry, Phytoplankton & Color of the Ocean (Gep&CO)j	0.31	261.27	North Pacific Ocean	5	surface	1190000	23.8	65219	9.15283	1255219	32.9528	0.0548059	0.384573	21.763	34.98	0	-	0.79	5.9
Geochemistry, Phytoplankton & Color of the Ocean (Gep&CO)j	-0.11	260.09	South Pacific Ocean	5	surface	1250000	25	101515	14.685	1351515	39.685	0.081212	0.587398	20.828	34.95	0	-	0.74	5.28
Geochemistry, Phytoplankton & Color of the Ocean (Gep&CO)j	-0.6	258.72	South Pacific Ocean	5	surface	1040000	20.8	93942	13.7189	1133942	34.5189	0.0903288	0.659564	20.701	34.89	0	-	0.64	4.16
Geochemistry, Phytoplankton & Color of the Ocean (Gep&CO)j	-1.08	257.38	South Pacific Ocean	5	surface	1150000	23	176187	17.9001	1326187	40.9001	0.153206	0.778267	20.848	34.83	7.13	-	0.55	2.7
Geochemistry, Phytoplankton & Color of the Ocean (Gep&CO)j	-2.56	253.25	South Pacific Ocean	5	surface	1040000	20.8	112392	8.83653	1152392	29.6365	0.108069	0.424833	20.81	34.97	0	-	0.69	4.49
Geochemistry, Phytoplankton & Color of the Ocean (Gep&CO)j	-2.4	253.7	South Pacific Ocean	5	surface	939926	18.7985	203126	11.3563	1143052	30.1548	0.216109	0.604107	20.884	35.07	0	-	0.71	4.38
Geochemistry, Phytoplankton & Color of the Ocean (Gep&CO)j	-3.39	250.8	South Pacific Ocean	5	surface	704074	14.0815	99476	5.34274	803550	19.4242	0.141286	0.379416	20.586	34.97	4.54	-	0.43	1.12
Geochemistry, Phytoplankton & Color of the Ocean (Gep&CO)j	-3.98	249.3	South Pacific Ocean	5	surface	516113	10.3223	83554	5.41251	599667	15.7348	0.161891	0.524353	20.538	35.01	0	-	0.59	3.02
Geochemistry, Phytoplankton & Color of the Ocean (Gep&CO)j	-5.55	244.87	South Pacific Ocean	5	surface	624728	12.4946	116788	5.21713	741516	17.7117	0.186942	0.417552	20.76	35.38	4.92	-	0.41	0.39
Geochemistry, Phytoplankton & Color of the Ocean (Gep&CO)j	-5.98	243.65	South Pacific Ocean	5	surface	469425	9.3885	117858	5.66391	587283	15.0524	0.251069	0.603281	20.628	35.49	6.47	-	0.45	1.47
Geochemistry, Phytoplankton & Color of the Ocean (Gep&CO)j	-6.44	242.37	South Pacific Ocean	5	surface	465188	9.30376	151249	7.04864	616437	16.3524	0.325135	0.757612	20.482	35.54	2.4	-	0.26	0.05
Geochemistry, Phytoplankton & Color of the Ocean (Gep&CO)j	-7.07	240.61	South Pacific Ocean	5	surface	507450	10.149	137482	6.61803	644932	16.767	0.270927	0.652087	20.272	35.53	2.69	-	0.27	0.21
Geochemistry, Phytoplankton & Color of the Ocean (Gep&CO)j	-8.67	236.54	South Pacific Ocean	5	surface	406712	8.13424	147527	7.14678	554239	15.281	0.362731	0.878605	20.283	35.45	4.85	-	0.39	0.91
Geochemistry, Phytoplankton & Color of the Ocean (Gep&CO)j	-8.93	235.36	South Pacific Ocean	5	surface	367710	7.3542	160406	7.47426	528116	14.8285	0.43623	1.01633	20.249	35.4	3.09	-	0.32	0.34
Geochemistry, Phytoplankton & Color of the Ocean (Gep&CO)j	-9.54	232.69	South Pacific Ocean	5	surface	392607	7.85214	117085	5.62898	509692	13.4811	0.298224	0.716872	20.216	35.43	5.82	-	0.43	1.32
Geochemistry, Phytoplankton & Color of the Ocean (Gep&CO)j	-11.35	228.5	South Pacific Ocean	5	surface	410944	8.21888	103115	5.52773	514059	13.7466	0.250922	0.672565	20.151	35.48	5.53	-	0.41	1.46
Geochemistry, Phytoplankton & Color of the Ocean (Gep&CO)j	-11.76	227.35	South Pacific Ocean	5	surface	379289	7.58578	119393	5.47009	498682	13.0559	0.314781	0.721097	18.017	35.63	4.91	-	0.37	1.07
Geochemistry, Phytoplankton & Color of the Ocean (Gep&CO)j	-12.72	224.59	South Pacific Ocean	5	surface	298705	5.9741	100012	4.962	398717	10.9361	0.334819	0.830585	20.151	35.77	4.26	-	0.33	0.91
Geochemistry, Phytoplankton & Color of the Ocean (Gep&CO)j	-14.13	220.55	South Pacific Ocean	5	surface	349906	6.99812	134141	6.48904	484047	13.4872	0.383363	0.927255	20.17	36.11	1.86	-	0.24	0.53
Geochemistry, Phytoplankton & Color of the Ocean (Gep&CO)j	-14.71	219.08	South Pacific Ocean	5	surface	284673	5.69346	94697	3.49824	379370	9.1917	0.332652	0.614432	20.237	36.22	1.18	-	0.17	0.29
Geochemistry, Phytoplankton & Color of the Ocean (Gep&CO)j	-15.78	216.62	South Pacific Ocean	5	surface	303190	6.0638	97495	4.37871	400685	10.4425	0.321564	0.722107	20.232	36.29	0.44	-	0.12	0.16
Geochemistry, Phytoplankton & Color of the Ocean (Gep&CO)j	-20.09	206	South Pacific Ocean	5	surface	28447	0.56894	29520	1.31587	57967	1.88481	1.03772	2.31284	19.905	35.65	0.85	-	0.05	0.17
Geochemistry, Phytoplankton & Color of the Ocean (Gep&CO)j	-20.75	204.85	South Pacific Ocean	5	surface	323073	6.46146	118083	5.82875	441156	12.2902	0.365499	0.90208	19.951	35.64	0.26	-	0.04	0.12
Geochemistry, Phytoplankton & Color of the Ocean (Gep&CO)j	-24.43	198.36	South Pacific Ocean	5	surface	277675	5.5535	97634	4.33051	375309	9.88401	0.351612	0.77978	19.848	35.46	1.1	-	0.02	0.5
Geochemistry, Phytoplankton & Color of the Ocean (Gep&CO)j	-25.22	196.94	South Pacific Ocean	5	surface	324947	6.49894	35531	1.32794	360478	7.82688	0.109344	0.204332	20.068	35.5	0.83	-	0	0.28
Geochemistry, Phytoplankton & Color of the Ocean (Gep&CO)j	-29.5	189.1	South Pacific Ocean	5	surface	107139	2.14278	209099	7.874	316238	10.0168	1.95166	3.67466	20.249	35.57	0.21	-	0	0
Geochemistry, Phytoplankton & Color of the Ocean (Gep&CO)j	-31.62	185.08	South Pacific Ocean	5	surface	179595	3.5919	235105	8.82136	414700	12.4133	1.30908	2.4559	20.45	35.61	0.21	-	0	0
Geochemistry, Phytoplankton & Color of the Ocean (Gep&CO)j	-32.3	183.78	South Pacific Ocean	5	surface	252651	5.05302	169737	7.37616	422388	12.4292	0.671824	1.45975	20.711	35.59	0.75	-	0.16	0
Geochemistry, Phytoplankton & Color of the Ocean (Gep&CO)j	-33	182.39	South Pacific Ocean	5	surface	279275	5.5855	135673	5.74051	414948	11.326	0.485804	1.02775	20.5	35.6	1.2	-	0.19	0.32
Geochemistry, Phytoplankton & Color of the Ocean (Gep&CO)j	-33.72	181.02	South Pacific Ocean	5	surface	300419	6.00838	109793	7.11899	410212	13.1274	0.365466	1.18484	20.495	35.56	0.93	-	0.06	0
Geochemistry, Phytoplankton & Color of the Ocean (Gep&CO)j	-34.37	180.27	South Pacific Ocean	5	surface	710235	14.2047	124870	14.0783	835105	28.283	0.175815	0.991104	20.519	35.45	1.66	-	0.16	0
Geochemistry, Phytoplankton & Color of the Ocean (Gep&CO)j	-35.87	176.75	South Pacific Ocean	5	surface	373768	7.47536	147752	10.0508	521520	17.5262	0.395304	1.34453	20.539	35.53	1.44	-	0.09	0
Geochemistry, Phytoplankton & Color of the Ocean (Gep&CO)j	-34.74	174.14	South Pacific Ocean	5	surface	358869	7.17738	39000	2.14346	397869	9.32084	0.108675	0.29864	20.494	35.5	2.71	-	0.16	0.74
Geochemistry, Phytoplankton & Color of the Ocean (Gep&CO)j	-33.44	173.26	South Pacific Ocean	5	surface	286706	5.73412	137171	13.0711	423877	18.8052	0.478438	2.27953	20.42	35.7	0.69	-	0	0
Geochemistry, Phytoplankton & Color of the Ocean (Gep&CO)j	-32.32	172.53	South Pacific Ocean	5	surface	300662	6.01324	104904	11.6712	405566	17.6844	0.34891	1.94091	20.379	35.71	1.12	-	0.05	0
Geochemistry, Phytoplankton & Color of the Ocean (Gep&CO)j	-29.54	170.72	South Pacific Ocean	5	surface	284077	5.68154	140261	15.5502	424338	21.2318	0.493743	2.73698	20.325	35.73	0.46	-	0	0
Geochemistry, Phytoplankton & Color of the Ocean (Gep&CO)j	-28.41	170	South Pacific Ocean	5	surface	295677	5.91354	171377	20.7295	467054	26.643	0.579609	3.50542	20.214	35.67	0.22	-	0	0
Geochemistry, Phytoplankton & Color of the Ocean (Gep&CO)j	-27.33	169.31	South Pacific Ocean	5	surface	355668	7.11336	189245	27.1643	544913	34.2777	0.532083	3.81877	20.037	35.58	0.1	-	0	0
Geochemistry, Phytoplankton & Color of the Ocean (Gep&CO)j	-26.14	168.57	South Pacific Ocean	5	surface	180183	3.60366	281754	22.1896	461937	25.7933	1.56371	6.15753	20.012	35.58	0.2	-	0	0
Geochemistry, Phytoplankton & Color of the Ocean (Gep&CO)j	-25.05	167.9	South Pacific Ocean	5	surface	229082	4.58164	234300	20.5629	463382	25.1445	1.02278	4.4881	19.714	35.27	0.19	-	0	0
Geochemistry, Phytoplankton & Color of the Ocean (Gep&CO)j	47.55	350.98	North Atlantic Ocean	5	surface	910777	18.2155	57168	10.4269	967945	28.6424	0.0627684	0.572415	20.886	35.54	2.2	-	0.22	0.52
Geochemistry, Phytoplankton & Color of the Ocean (Gep&CO)j	46.9	349.44	North Atlantic Ocean	5	surface	640517	12.8103	66508	7.4796	707025	20.2899	0.103835	0.583872	20.853	35.57	2.76	-	0.26	0.44
Geochemistry, Phytoplankton & Color of the Ocean (Gep&CO)j	46.18	347.73	North Atlantic Ocean	5	surface	898676	17.9735	107904	8.88565	1006580	26.8592	0.12007	0.494374	20.773	35.63	1.98	-	0.22	0.54
Geochemistry, Phytoplankton & Color of the Ocean (Gep&CO)j	45.48	346.15	North Atlantic Ocean	5	surface	727088	14.5418	83585	5.12488	810673	19.6666	0.114959	0.352425	20.686	35.68	0.86	-	0.17	0.5
Geochemistry, Phytoplankton & Color of the Ocean (Gep&CO)j	44.96	344.59	North Atlantic Ocean	5	surface	600061	12.0012	95459	4.46058	695520	16.4618	0.159082	0.371678	20.61	35.74	0.25	-	0.14	0.38
Geochemistry, Phytoplankton & Color of the Ocean (Gep&CO)j	44.63	340.44	North Atlantic Ocean	5	surface	660634	13.2127	121729	5.71629	782363	18.929	0.184261	0.432636	20.643	35.73	0.25	-	0.13	0.27
Geochemistry, Phytoplankton & Color of the Ocean (Gep&CO)j	44.5	338.7	North Atlantic Ocean	5	surface	589548	11.791	72152	3.45572	661700	15.2467	0.122385	0.293082	20.705	35.79	0.52	-	0.15	0.41
Geochemistry, Phytoplankton & Color of the Ocean (Gep&CO)j	44.37	336.88	North Atlantic Ocean	5	surface	362709	7.25418	68195	3.50977	430904	10.764	0.188016	0.483828	20.669	35.84	0.25	-	0.11	0.36
Geochemistry, Phytoplankton & Color of the Ocean (Gep&CO)j	44.22	334.97	North Atlantic Ocean	5	surface	350426	7.00852	91814	4.41998	442240	11.4285	0.262007	0.630658	20.62	35.89	0.22	-	0.1	0.35
Geochemistry, Phytoplankton & Color of the Ocean (Gep&CO)j	44.02	333.68	North Atlantic Ocean	5	surface	474608	9.49216	148908	6.67867	623516	16.1708	0.313749	0.703599	20.639	36.03	0.26	-	0.08	0.36
Geochemistry, Phytoplankton & Color of the Ocean (Gep&CO)j	43.7	330.25	North Atlantic Ocean	5	surface	431730	8.6346	155835	6.59562	587565	15.2302	0.360955	0.763859	20.584	35.99	0.25	-	0.07	0.28
Geochemistry, Phytoplankton & Color of the Ocean (Gep&CO)j	43.6	328.73	North Atlantic Ocean	5	surface	347505	6.9501	141029	5.92226	488534	12.8724	0.405833	0.852111	20.579	36.04	0.2	-	0.07	0.22
Geochemistry, Phytoplankton & Color of the Ocean (Gep&CO)j	43.51	327.07	North Atlantic Ocean	5	surface	368783	7.37566	25491	1.58411	394274	8.95977	0.0691219	0.214775	20.44	35.93	0.22	-	0.08	0.1
Geochemistry, Phytoplankton & Color of the Ocean (Gep&CO)j	43.42	325.2	North Atlantic Ocean	5	surface	367183	7.34366	75497	4.22501	442680	11.5687	0.205611	0.575327	20.516	36.08	0.19	-	0.06	0.01
Geochemistry, Phytoplankton & Color of the Ocean (Gep&CO)j	43.32	323.87	North Atlantic Ocean	5	surface	428989	8.57978	122410	5.6703	551399	14.2501	0.285345	0.660891	20.421	36.17	0.16	-	0.06	0
Geochemistry, Phytoplankton & Color of the Ocean (Gep&CO)j	42.98	319.92	North Atlantic Ocean	5	surface	444990	8.8998	122840	5.52913	567830	14.4289	0.276051	0.621265	20.395	36.33	0.16	-	0.04	0
Geochemistry, Phytoplankton & Color of the Ocean (Gep&CO)j	42.85	318.3	North Atlantic Ocean	5	surface	420953	8.41906	94047	4.37013	515000	12.7892	0.223414	0.519076	20.532	36.21	0.18	-	0.06	0.02
Geochemistry, Phytoplankton & Color of the Ocean (Gep&CO)j	42.71	316.54	North Atlantic Ocean	5	surface	450630	9.0126	91470	4.66668	542100	13.6793	0.202982	0.517796	20.344	36.18	0.2	-	0.06	0.09
Geochemistry, Phytoplankton & Color of the Ocean (Gep&CO)j	42.56	314.7	North Atlantic Ocean	5	surface	453046	9.06092	91415	4.94679	544461	14.0077	0.201779	0.545948	20.436	36.16	0.73	-	0.06	0.28
Geochemistry, Phytoplankton & Color of the Ocean (Gep&CO)j	42.45	313.34	North Atlantic Ocean	5	surface	494577	9.89154	186923	10.1197	681500	20.0113	0.377945	1.02307	19.88	35.76	0.26	-	0.07	0.35
Geochemistry, Phytoplankton & Color of the Ocean (Gep&CO)j	42.15	309.73	North Atlantic Ocean	5	surface	717212	14.3442	159806	24.296	877018	38.6402	0.222816	1.69378	19.723	33.07	0.19	-	0.16	0
Geochemistry, Phytoplankton & Color of the Ocean (Gep&CO)j	42.05	308.42	North Atlantic Ocean	5	surface	557495	11.1499	95901	12.8366	653396	23.9865	0.172021	1.15127	19.593	32.21	0.21	-	0.14	0.13
Geochemistry, Phytoplankton & Color of the Ocean (Gep&CO)j	41.95	307.32	North Atlantic Ocean	5	surface	506134	10.1227	63119	6.60654	569253	16.7292	0.124708	0.652647	19.678	33.45	0.21	-	0.13	0.2
Geochemistry, Phytoplankton & Color of the Ocean (Gep&CO)j	41.85	306.14	North Atlantic Ocean	5	surface	525935	10.5187	110537	7.73763	636472	18.2563	0.210172	0.735607	19.877	34.62	0.2	-	0.1	0.31
Geochemistry, Phytoplankton & Color of the Ocean (Gep&CO)j	41.56	302.73	North Atlantic Ocean	5	surface	549081	10.9816	59291	7.78757	608372	18.7692	0.107982	0.709146	20.046	35.5	0.5	-	0.11	0.65
Geochemistry, Phytoplankton & Color of the Ocean (Gep&CO)j	41.42	300.78	North Atlantic Ocean	5	surface	519324	10.3865	98803	7.68297	618127	18.0694	0.190253	0.739708	20.179	35.12	0.47	-	0.11	0.4
Geochemistry, Phytoplankton & Color of the Ocean (Gep&CO)j	41.27	299.02	North Atlantic Ocean	5	surface	551191	11.0238	97619	7.08882	648810	18.1126	0.177106	0.643046	20.061	35.1	0.2	-	0.1	0.41
Geochemistry, Phytoplankton & Color of the Ocean (Gep&CO)j	41.1	297.15	North Atlantic Ocean	5	surface	583285	11.6657	81953	12.4244	665238	24.0901	0.140502	1.06504	19.998	34.84	0.5	-	0.09	1.62
Geochemistry, Phytoplankton & Color of the Ocean (Gep&CO)j	40.98	295.49	North Atlantic Ocean	5	surface	530896	10.6179	105321	16.1921	636217	26.8101	0.198383	1.52498	19.989	35.15	0.17	-	0.1	0.42
Geochemistry, Phytoplankton & Color of the Ocean (Gep&CO)j	40.65	291.82	North Atlantic Ocean	5	surface	1526421	30.5284	50449	9.42415	1576870	39.9526	0.0330505	0.308701	19.868	32.51	0.41	-	0.35	0.96
Geochemistry, Phytoplankton & Color of the Ocean (Gep&CO)j	40.56	290.1	North Atlantic Ocean	5	surface	1435621	28.7124	57245	10.2994	1492866	39.0119	0.0398747	0.35871	19.92	32.48	0.73	-	0.39	1.17
Geochemistry, Phytoplankton & Color of the Ocean (Gep&CO)j	40.51	287.8	North Atlantic Ocean	5	surface	1706476	34.1295	92927	20.3608	1799403	54.4903	0.0544555	0.596574	19.685	32.69	0.19	-	0.32	0.43
Geochemistry, Phytoplankton & Color of the Ocean (Gep&CO)j	40.33	286.14	North Atlantic Ocean	5	surface	1421762	28.4352	111375	23.6127	1533137	52.0479	0.0783359	0.830401	19.816	33.18	0.35	-	0.41	1.33
Geochemistry, Phytoplankton & Color of the Ocean (Gep&CO)j	38.02	285.68	North Atlantic Ocean	5	surface	901322	18.0264	61517	13.449	962839	31.4754	0.068252	0.746068	19.979	33.66	0.3	-	0.24	0.77
Geochemistry, Phytoplankton & Color of the Ocean (Gep&CO)j	36.86	284.32	North Atlantic Ocean	5	surface	2425872	48.5174	114333	25.0964	2540205	73.6139	0.0471307	0.517266	19.31	31.9	0.36	-	0.47	3.36
Geochemistry, Phytoplankton & Color of the Ocean (Gep&CO)j	36.33	284.83	North Atlantic Ocean	5	surface	1345644	26.9129	154978	36.4438	1500622	63.3567	0.11517	1.35414	19.731	33	0.25	-	0.35	1.03
Geochemistry, Phytoplankton & Color of the Ocean (Gep&CO)j	35.1	285.09	North Atlantic Ocean	5	surface	448823	8.97646	112971	7.27366	561794	16.2501	0.251705	0.810304	19.858	36.34	0.17	-	0.09	0.52
Geochemistry, Phytoplankton & Color of the Ocean (Gep&CO)j	34.3	283.97	North Atlantic Ocean	5	surface	514747	10.2949	153973	14.3379	668720	24.6328	0.299124	1.39271	19.92	36.26	0.18	-	0.09	0.81
Geochemistry, Phytoplankton & Color of the Ocean (Gep&CO)j	33.45	282.65	North Atlantic Ocean	5	surface	506224	10.1245	140807	12.9112	647031	23.0357	0.278152	1.27525	19.861	36.25	0.2	-	0.1	0.7
Geochemistry, Phytoplankton & Color of the Ocean (Gep&CO)j	32.93	281.97	North Atlantic Ocean	5	surface	440249	8.80498	131430	9.31278	571679	18.1178	0.298536	1.05767	19.959	36.35	0.22	-	0.09	0.68
Geochemistry, Phytoplankton & Color of the Ocean (Gep&CO)j	31.55	278.72	North Atlantic Ocean	5	surface	839866	16.7973	164149	19.2498	1004015	36.0472	0.195447	1.14601	20.126	36.32	0.35	-	0.11	0.62
Geochemistry, Phytoplankton & Color of the Ocean (Gep&CO)j	30.56	280.47	North Atlantic Ocean	5	surface	448210	8.9642	96251	6.25346	544461	15.2177	0.214745	0.697604	19.942	36.44	0.19	-	0.08	0.57
Geochemistry, Phytoplankton & Color of the Ocean (Gep&CO)j	29.42	281.32	North Atlantic Ocean	5	surface	372122	7.44244	46764	3.71431	418886	11.1568	0.125668	0.499072	19.96	36.7	0.13	-	0.06	0.16
Geochemistry, Phytoplankton & Color of the Ocean (Gep&CO)j	28.33	282.12	North Atlantic Ocean	5	surface	291740	5.8348	39812	3.67913	331552	9.51393	0.136464	0.630549	20.061	36.6	0.21	-	0.08	0.49
Geochemistry, Phytoplankton & Color of the Ocean (Gep&CO)j	27.35	282.82	North Atlantic Ocean	5	surface	344692	6.89384	30847	3.11066	375539	10.0045	0.0894915	0.451223	20.384	36.64	0.16	-	0.07	0.37
Geochemistry, Phytoplankton & Color of the Ocean (Gep&CO)j	25.07	284.47	North Atlantic Ocean	5	surface	356663	7.13326	34846	3.61887	391509	10.7521	0.0977001	0.507324	19.892	36.65	0.16	-	0.07	0.37
Geochemistry, Phytoplankton & Color of the Ocean (Gep&CO)j	24.03	285.2	North Atlantic Ocean	5	surface	427558	8.55116	36915	4.86437	464473	13.4155	0.0863392	0.568855	19.925	36.71	0.19	-	0.07	0.48
Geochemistry, Phytoplankton & Color of the Ocean (Gep&CO)j	22.7	285.35	North Atlantic Ocean	5	surface	348380	6.9676	68897	3.32045	417277	10.2881	0.197764	0.476556	19.914	36.42	0.18	-	0.07	0.7
Geochemistry, Phytoplankton & Color of the Ocean (Gep&CO)j	21.5	285.54	North Atlantic Ocean	5	surface	351228	7.02456	55831	3.59447	407059	10.619	0.158959	0.5117	20.051	36.62	0.17	-	0.07	0.65
Geochemistry, Phytoplankton & Color of the Ocean (Gep&CO)j	20.42	285.97	North Atlantic Ocean	5	surface	472133	9.44266	51294	2.91296	523427	12.3556	0.108643	0.308489	19.986	36.46	0.16	-	0.07	0.49
Geochemistry, Phytoplankton & Color of the Ocean (Gep&CO)j	17.75	284.7	North Atlantic Ocean	5	surface	815423	16.3085	36717	1.51035	852140	17.8188	0.0450282	0.0926113	19.505	35.17	0.18	-	0.07	0.94
Geochemistry, Phytoplankton & Color of the Ocean (Gep&CO)j	16.66	284.09	North Atlantic Ocean	5	surface	814046	16.2809	23747	1.02628	837793	17.3072	0.0291716	0.0630357	19.33	34.87	0.14	-	0.06	1.32
Geochemistry, Phytoplankton & Color of the Ocean (Gep&CO)j	15.48	283.44	North Atlantic Ocean	5	surface	809560	16.1912	24003	1.01626	833563	17.2075	0.0296494	0.0627662	19.482	35.36	0.16	-	0.07	0.86
Geochemistry, Phytoplankton & Color of the Ocean (Gep&CO)j	14.33	282.78	North Atlantic Ocean	5	surface	771400	15.428	32084	1.30079	803484	16.7288	0.0415919	0.0843137	19.399	35.21	0.17	-	0.06	0.94
Geochemistry, Phytoplankton & Color of the Ocean (Gep&CO)j	13.27	282.2	North Atlantic Ocean	5	surface	711470	14.2294	29521	1.8393	740991	16.0687	0.041493	0.12926	19.678	35.63	0.17	-	0.07	0.95
Geochemistry, Phytoplankton & Color of the Ocean (Gep&CO)j	10.95	280.93	North Pacific Ocean	5	surface	738933	14.7787	28559	1.74769	767492	16.5264	0.038649	0.118258	19.483	35.27	0.16	-	0.06	0.89
Geochemistry, Phytoplankton & Color of the Ocean (Gep&CO)j	10.51	280.72	North Pacific Ocean	5	surface	689858	13.7972	33769	1.82167	723627	15.6188	0.0489507	0.132033	19.656	35.5	0.16	-	0.05	0.68
Geochemistry, Phytoplankton & Color of the Ocean (Gep&CO)j	8.13	280.32	North Pacific Ocean	5	surface	1289333	25.7867	31975	1.14448	1321308	26.9311	0.0247996	0.0443828	16.651	28.89	0.2	-	0.11	2.19
Geochemistry, Phytoplankton & Color of the Ocean (Gep&CO)j	6.96	279.9	North Pacific Ocean	5	surface	1218288	24.3658	60163	10.3949	1278451	34.7606	0.0493832	0.426618	15.932	27.75	0.17	-	0.08	4
Geochemistry, Phytoplankton & Color of the Ocean (Gep&CO)j	6.02	277.25	North Pacific Ocean	5	surface	921830	18.4366	63629	3.37396	985459	21.8106	0.0690247	0.183004	17.91	31.67	0.19	-	0.19	0.73
Geochemistry, Phytoplankton & Color of the Ocean (Gep&CO)j	5.6	276.05	North Pacific Ocean	5	surface	690281	13.8056	139843	12.2901	830124	26.0957	0.202589	0.890224	18.771	32.94	1.46	-	0.31	1.4
Geochemistry, Phytoplankton & Color of the Ocean (Gep&CO)j	5.17	274.83	North Pacific Ocean	5	surface	979361	19.5872	123106	16.2553	1102467	35.8425	0.1257	0.829892	18.917	33.12	2.29	-	0.36	0.9
Geochemistry, Phytoplankton & Color of the Ocean (Gep&CO)j	4.76	273.73	North Pacific Ocean	5	surface	666096	13.3219	121197	17.0792	787293	30.4012	0.181951	1.28204	18.987	33.15	1.91	-	0.34	0.84
Geochemistry, Phytoplankton & Color of the Ocean (Gep&CO)j	4.38	272.67	North Pacific Ocean	5	surface	659068	13.1814	167428	16.2848	826496	29.4662	0.254038	1.23544	18.966	33.27	1	-	0.25	0.58
Geochemistry, Phytoplankton & Color of the Ocean (Gep&CO)j	3.35	269.78	North Pacific Ocean	5	surface	555381	11.1076	133000	9.1134	688381	20.221	0.239475	0.820464	18.998	33.38	0.63	-	0.23	0.7
Geochemistry, Phytoplankton & Color of the Ocean (Gep&CO)j	2.96	268.68	North Pacific Ocean	5	surface	616291	12.3258	119628	8.26956	735919	20.5954	0.19411	0.670913	18.903	33.3	0.7	-	0.25	0.89
Geochemistry, Phytoplankton & Color of the Ocean (Gep&CO)j	2.46	267.32	North Pacific Ocean	5	surface	570610	11.4122	110829	7.12725	681439	18.5395	0.194229	0.624529	18.868	33.39	0.48	-	0.23	0.94
Geochemistry, Phytoplankton & Color of the Ocean (Gep&CO)j	2	266	North Pacific Ocean	5	surface	666259	13.3252	103486	5.81973	769745	19.1449	0.155324	0.436747	19.061	33.58	0.58	-	0.22	0.69
Geochemistry, Phytoplankton & Color of the Ocean (Gep&CO)j	1.61	264.93	North Pacific Ocean	5	surface	667514	13.3503	112047	10.3114	779561	23.6617	0.167857	0.772375	19.124	33.74	0.47	-	0.21	0.58
Geochemistry, Phytoplankton & Color of the Ocean (Gep&CO)j	0.55	261.97	North Pacific Ocean	5	surface	633004	12.6601	56248	6.86399	689252	19.5241	0.0888588	0.542176	20.648	34.8	8.72	-	0.68	3.74
Geochemistry, Phytoplankton & Color of the Ocean (Gep&CO)j	0.13	260.8	North Pacific Ocean	5	surface	948898	18.978	61765	5.92558	1010663	24.9035	0.0650913	0.312235	20.781	34.88	8.9	-	0.85	5
Geochemistry, Phytoplankton & Color of the Ocean (Gep&CO)j	-0.35	259.44	South Pacific Ocean	5	surface	1109590	22.1918	59156	6.55933	1168746	28.7511	0.0533134	0.295575	20.752	34.82	8.9	-	0.76	4.42
Geochemistry, Phytoplankton & Color of the Ocean (Gep&CO)j	-1	257.63	South Pacific Ocean	5	surface	1015872	20.3174	85179	10.371	1101051	30.6885	0.0838482	0.51045	20.593	34.74	8.35	-	0.71	3.84
Geochemistry, Phytoplankton & Color of the Ocean (Gep&CO)j	-2.22	254.24	South Pacific Ocean	5	surface	1337590	26.7518	196226	13.6532	1533816	40.405	0.146701	0.510367	20.577	35.9	8.9	-	0.85	4.52
Geochemistry, Phytoplankton & Color of the Ocean (Gep&CO)j	-2.73	252.78	South Pacific Ocean	5	surface	833776	16.6755	201782	9.04572	1035558	25.7212	0.24201	0.542455	20.622	35.08	8.9	-	0.86	3.71
Geochemistry, Phytoplankton & Color of the Ocean (Gep&CO)j	-3.32	251.14	South Pacific Ocean	5	surface	659122	13.1824	78034	3.46256	737156	16.645	0.118391	0.262665	20.67	35.13	8.9	-	0.92	3.15
Geochemistry, Phytoplankton & Color of the Ocean (Gep&CO)j	-3.88	249.55	South Pacific Ocean	5	surface	864021	17.2804	117301	6.39079	981322	23.6712	0.135762	0.369828	20.611	35.03	8.47	-	0.67	2.81
Geochemistry, Phytoplankton & Color of the Ocean (Gep&CO)j	-4.98	246.47	South Pacific Ocean	5	surface	870230	17.4046	198628	9.62352	1068858	27.0281	0.228248	0.55293	20.577	35.07	8.9	-	0.78	3.78
Geochemistry, Phytoplankton & Color of the Ocean (Gep&CO)j	-5.58	245.77	South Pacific Ocean	5	surface	716029	14.3206	135634	6.52451	851663	20.8451	0.189425	0.455603	20.517	35.32	8.9	-	0.69	1.74
Geochemistry, Phytoplankton & Color of the Ocean (Gep&CO)j	-6.08	243.39	South Pacific Ocean	5	surface	604285	12.0857	150147	6.96962	754432	19.0553	0.248471	0.576683	20.454	35.3	8.9	-	0.73	2.07
Geochemistry, Phytoplankton & Color of the Ocean (Gep&CO)j	-7.93	238.19	South Pacific Ocean	5	surface	846047	16.9209	229689	10.1041	1075736	27.025	0.271485	0.597133	20.496	35.12	9.02	-	0.68	3.02
Geochemistry, Phytoplankton & Color of the Ocean (Gep&CO)j	-8.35	236.98	South Pacific Ocean	5	surface	537682	10.7536	228749	10.581	766431	21.3346	0.425435	0.983942	20.425	35.28	8.77	-	0.68	2.08
Geochemistry, Phytoplankton & Color of the Ocean (Gep&CO)j	-8.86	235.55	South Pacific Ocean	5	surface	547074	10.9415	131868	6.62553	678942	17.567	0.241042	0.605543	20.329	35.41	7.51	-	0.62	1.67
Geochemistry, Phytoplankton & Color of the Ocean (Gep&CO)j	-9.32	234.25	South Pacific Ocean	5	surface	567247	11.3449	162212	7.47922	729459	18.8242	0.285964	0.659256	20.226	35.56	5.18	-	0.51	1.13
Geochemistry, Phytoplankton & Color of the Ocean (Gep&CO)j	-9.7	233.2	South Pacific Ocean	5	surface	568916	11.3783	183232	8.52495	752148	19.9033	0.322072	0.749227	20.174	35.65	2.99	-	0.41	0.57
Geochemistry, Phytoplankton & Color of the Ocean (Gep&CO)j	-10.6	230.72	South Pacific Ocean	5	surface	517939	10.3588	163145	7.16126	681084	17.52	0.314989	0.691323	20.191	35.66	3.14	-	0.43	0.89
Geochemistry, Phytoplankton & Color of the Ocean (Gep&CO)j	-11.15	229.05	South Pacific Ocean	5	surface	532828	10.6566	139421	6.47663	672249	17.1332	0.261662	0.60776	20.177	35.65	3.58	-	0.45	0.87
Geochemistry, Phytoplankton & Color of the Ocean (Gep&CO)j	-11.66	227.62	South Pacific Ocean	5	surface	598759	11.9752	152188	7.55917	750947	19.5344	0.254172	0.631237	20.093	35.81	3.01	-	0.42	1.03
Geochemistry, Phytoplankton & Color of the Ocean (Gep&CO)j	-12.02	226.59	South Pacific Ocean	5	surface	470905	9.4181	141418	7.2927	612323	16.7108	0.300311	0.774328	20.092	35.61	3.49	-	0.44	1.04
Geochemistry, Phytoplankton & Color of the Ocean (Gep&CO)j	-13.07	223.27	South Pacific Ocean	5	surface	504807	10.0961	174973	9.84606	679780	19.9422	0.346614	0.97523	20.107	35.72	2.36	-	0.33	1.46
Geochemistry, Phytoplankton & Color of the Ocean (Gep&CO)j	-13.65	221.93	South Pacific Ocean	5	surface	749492	14.9898	158529	8.79858	908021	23.7884	0.211515	0.58697	19.994	35.84	2.18	-	0.34	0.84
Geochemistry, Phytoplankton & Color of the Ocean (Gep&CO)j	-14.15	220.29	South Pacific Ocean	5	surface	750308	15.0062	118511	6.72811	868819	21.7343	0.15795	0.448357	20.091	35.95	1.91	-	0.35	0.78
Geochemistry, Phytoplankton & Color of the Ocean (Gep&CO)j	-14.85	218.78	South Pacific Ocean	5	surface	562995	11.2599	96505	5.26857	659500	16.5285	0.171414	0.467905	20.001	35.91	1.64	-	0.32	1.52
Geochemistry, Phytoplankton & Color of the Ocean (Gep&CO)j	-16.25	215.5	South Pacific Ocean	5	surface	535090	10.7018	149426	7.03023	684516	17.732	0.279254	0.65692	20.031	36.04	0.29	-	0.28	0.34
Geochemistry, Phytoplankton & Color of the Ocean (Gep&CO)j	-16.76	214.1	South Pacific Ocean	5	surface	478346	9.56692	113130	4.65921	591476	14.2261	0.236502	0.487013	20.064	36.22	0.09	-	0.25	0.37
Geochemistry, Phytoplankton & Color of the Ocean (Gep&CO)j	-16.95	213.07	South Pacific Ocean	5	surface	328567	6.57134	163218	6.26142	491785	12.8328	0.496757	0.952837	20.126	36.23	0.09	-	0.25	0.42
Geochemistry, Phytoplankton & Color of the Ocean (Gep&CO)j	-17.85	209.85	South Pacific Ocean	5	surface	371004	7.42008	110173	4.1241	481177	11.5442	0.296959	0.555802	20.012	36.13	0.07	-	0.2	0.28
Geochemistry, Phytoplankton & Color of the Ocean (Gep&CO)j	-19.32	207.34	South Pacific Ocean	5	surface	237734	4.75468	199469	7.4041	437203	12.1588	0.839043	1.55722	20.001	35.98	0.08	-	0.2	0.36
Geochemistry, Phytoplankton & Color of the Ocean (Gep&CO)j	-19.96	206.22	South Pacific Ocean	5	surface	515071	10.3014	1245	0.130944	516316	10.4324	0.00241714	0.0127113	19.99	36.02	0.05	-	0.17	0.21
Geochemistry, Phytoplankton & Color of the Ocean (Gep&CO)j	-20.8	204.77	South Pacific Ocean	5	surface	362025	7.2405	668	0.0139462	362693	7.25445	0.00184518	0.00192614	19.934	35.82	0.08	-	0.18	0.29
Geochemistry, Phytoplankton & Color of the Ocean (Gep&CO)j	-21.73	203.14	South Pacific Ocean	5	surface	392879	7.85758	538	0.00594819	393417	7.86353	0.00136938	0.000757	19.873	35.71	0.1	-	0.18	0.35
Geochemistry, Phytoplankton & Color of the Ocean (Gep&CO)j	-23.4	200.22	South Pacific Ocean	5	surface	346627	6.93254	28814	1.29807	375441	8.23061	0.0831268	0.187243	19.841	35.44	0.11	-	0.14	0.28
Geochemistry, Phytoplankton & Color of the Ocean (Gep&CO)j	-24.13	198.9	South Pacific Ocean	5	surface	420638	8.41276	47798	1.90553	468436	10.3183	0.113632	0.226504	19.713	35.47	0.09	-	0.13	0.17
Geochemistry, Phytoplankton & Color of the Ocean (Gep&CO)j	-24.95	197.44	South Pacific Ocean	5	surface	305997	6.11994	132679	5.11298	438676	11.2329	0.433596	0.835463	19.747	35.34	0.09	-	0.1	0.27
Geochemistry, Phytoplankton & Color of the Ocean (Gep&CO)j	-25.8	195.92	South Pacific Ocean	5	surface	309226	6.18452	214316	8.24884	523542	14.4334	0.693072	1.33379	19.62	35.21	0.1	-	0.1	0.22
Geochemistry, Phytoplankton & Color of the Ocean (Gep&CO)j	-27.56	192.67	South Pacific Ocean	5	surface	254408	5.08816	78519	3.0596	332927	8.14776	0.308634	0.601318	19.978	35.5	0.09	-	0.11	0.18
Geochemistry, Phytoplankton & Color of the Ocean (Gep&CO)j	-28.22	191.47	South Pacific Ocean	5	surface	340376	6.80752	17597	0.957268	357973	7.76479	0.0516987	0.140619	19.945	35.49	0.42	-	0.1	1.32
Geochemistry, Phytoplankton & Color of the Ocean (Gep&CO)j	-29.07	189.92	South Pacific Ocean	5	surface	467103	9.34206	10044	0.703763	477147	10.0458	0.0215028	0.0753327	20.051	35.52	0.1	-	0.12	0.31
Geochemistry, Phytoplankton & Color of the Ocean (Gep&CO)j	-30.57	186.37	South Pacific Ocean	5	surface	471008	9.42016	144246	5.82984	615254	15.25	0.30625	0.618868	20.048	35.57	0.07	-	0.11	0.24
Geochemistry, Phytoplankton & Color of the Ocean (Gep&CO)j	-31.66	185	South Pacific Ocean	5	surface	503900	10.078	74174	3.4711	578074	13.5491	0.1472	0.344423	20.153	35.58	0.21	-	0.12	0.75
Geochemistry, Phytoplankton & Color of the Ocean (Gep&CO)j	-32.37	183.67	South Pacific Ocean	5	surface	583162	11.6632	75512	4.54697	658674	16.2102	0.129487	0.389854	20.227	35.59	0.1	-	0.15	0.35
Geochemistry, Phytoplankton & Color of the Ocean (Gep&CO)j	-33	182.42	South Pacific Ocean	5	surface	740089	14.8018	23298	2.80121	763387	17.603	0.03148	0.189248	20.338	35.58	0.13	-	0.2	0.45
Geochemistry, Phytoplankton & Color of the Ocean (Gep&CO)j	-33.6	181.27	South Pacific Ocean	5	surface	912024	18.2405	161390	20.902	1073414	39.1425	0.176958	1.14591	20.246	35.61	0.27	-	0.15	0.78
Geochemistry, Phytoplankton & Color of the Ocean (Gep&CO)j	-35.08	178.48	South Pacific Ocean	5	surface	1062276	21.2455	109800	13.8911	1172076	35.1367	0.103363	0.653838	20.443	35.59	1.24	-	0.2	1.8
Geochemistry, Phytoplankton & Color of the Ocean (Gep&CO)j	-35.68	177.13	South Pacific Ocean	5	surface	1381577	27.6315	67185	6.64663	1448762	34.2782	0.0486292	0.240545	20.454	35.41	0.76	-	0.21	0.78
Geochemistry, Phytoplankton & Color of the Ocean (Gep&CO)j	-35.7	174.71	South Pacific Ocean	5	surface	1694747	33.8949	146190	19.0095	1840937	52.9045	0.0862607	0.560836	20.421	35.43	1.31	-	0.25	1.53
Geochemistry, Phytoplankton & Color of the Ocean (Gep&CO)j	-34.65	174.08	South Pacific Ocean	5	surface	1636541	32.7308	87367	9.80545	1723908	42.5363	0.0533852	0.299579	20.205	35.65	0.5	-	0.19	0.68
Geochemistry, Phytoplankton & Color of the Ocean (Gep&CO)j	-33.4	173.23	South Pacific Ocean	5	surface	1238476	24.7695	167573	19.2374	1406049	44.0069	0.135306	0.776656	20.355	35.71	0.3	-	0.19	1.21
Geochemistry, Phytoplankton & Color of the Ocean (Gep&CO)j	-31.95	172.28	South Pacific Ocean	5	surface	1196992	23.9398	140918	16.1649	1337910	40.1047	0.117727	0.675229	20.454	35.63	0.81	-	0.2	2.15
Geochemistry, Phytoplankton & Color of the Ocean (Gep&CO)j	-30.73	171.48	South Pacific Ocean	5	surface	909146	18.1829	131549	14.4209	1040695	32.6038	0.144695	0.793102	20.23	35.46	0.21	-	0.13	1.3
Geochemistry, Phytoplankton & Color of the Ocean (Gep&CO)j	-28.42	170	South Pacific Ocean	5	surface	384070	7.6814	138804	5.68118	522874	13.3626	0.361403	0.739602	20.102	35.51	0.12	-	0.15	0.88
Geochemistry, Phytoplankton & Color of the Ocean (Gep&CO)j	-27.4	169.35	South Pacific Ocean	5	surface	412621	8.25242	135477	5.56026	548098	13.8127	0.328333	0.673773	19.871	35.3	0.12	-	0.09	0.85
Geochemistry, Phytoplankton & Color of the Ocean (Gep&CO)j	-26.35	168.7	South Pacific Ocean	5	surface	517533	10.3507	65271	2.87779	582804	13.2284	0.126119	0.278029	19.86	35.26	0.12	-	0.11	0.85
Geochemistry, Phytoplankton & Color of the Ocean (Gep&CO)j	-26	168.1	South Pacific Ocean	5	surface	412116	8.24232	137597	5.43824	549713	13.6806	0.333879	0.659795	19.693	35.16	0.13	-	0.1	2.43
Geochemistry, Phytoplankton & Color of the Ocean (Gep&CO)j	-24.2	167.37	South Pacific Ocean	5	surface	336854	6.73708	154877	5.91078	491731	12.6479	0.459775	0.87735	19.7	35.09	0.1	-	0.12	5.43
Geochemistry, Phytoplankton & Color of the Ocean (Gep&CO)j	47.56	351.07	North Atlantic Ocean	5	surface	281980	5.6396	10943	1.52408	292923	7.16368	0.0388077	0.270247	21.215	35.57	7.31	-	0.35	2.57
Geochemistry, Phytoplankton & Color of the Ocean (Gep&CO)j	46.86	349.37	North Atlantic Ocean	5	surface	294506	5.89012	12133	1.62277	306639	7.51289	0.0411978	0.275507	21.169	35.56	7.79	-	0.37	2.46
Geochemistry, Phytoplankton & Color of the Ocean (Gep&CO)j	46.37	348.2	North Atlantic Ocean	5	surface	250372	5.00744	10874	1.56792	261246	6.57536	0.0434314	0.313119	21.142	35.62	4.14	-	0.26	6.19
Geochemistry, Phytoplankton & Color of the Ocean (Gep&CO)j	44.93	344.09	North Atlantic Ocean	5	surface	244498	4.88996	22690	2.33893	267188	7.22889	0.0928024	0.478313	21.14	35.68	6.45	-	0.29	2.48
Geochemistry, Phytoplankton & Color of the Ocean (Gep&CO)j	44.78	342.29	North Atlantic Ocean	5	surface	235835	4.7167	17178	2.23726	253013	6.95396	0.0728391	0.474328	21.102	35.68	5.62	-	0.29	2.89
Geochemistry, Phytoplankton & Color of the Ocean (Gep&CO)j	44.61	340.24	North Atlantic Ocean	5	surface	224895	4.4979	10072	1.28087	234967	5.77877	0.0447853	0.28477	21.175	35.77	6.22	-	0.3	3.12
Geochemistry, Phytoplankton & Color of the Ocean (Gep&CO)j	44.48	338.47	North Atlantic Ocean	5	surface	205433	4.10866	11763	1.38383	217196	5.49249	0.0572595	0.336807	21.136	35.79	3.44	-	0.21	3.57
Geochemistry, Phytoplankton & Color of the Ocean (Gep&CO)j	44.07	333.34	North Atlantic Ocean	5	surface	200315	4.0063	14257	1.17711	214572	5.18341	0.0711729	0.293816	21.076	35.94	5.11	-	0.22	1.8
Geochemistry, Phytoplankton & Color of the Ocean (Gep&CO)j	43.95	331.97	North Atlantic Ocean	5	surface	246815	4.9363	19336	1.48957	266151	6.42587	0.0783421	0.301758	20.997	36.02	4.33	-	0.19	1.91
Geochemistry, Phytoplankton & Color of the Ocean (Gep&CO)j	43.83	330.27	North Atlantic Ocean	5	surface	201354	4.02708	10476	1.38388	211830	5.41096	0.0520278	0.343644	21.077	35.91	5.52	-	0.23	2.2
Geochemistry, Phytoplankton & Color of the Ocean (Gep&CO)j	43.68	328.47	North Atlantic Ocean	5	surface	195298	3.90596	11290	1.32503	206588	5.23099	0.0578091	0.339234	21.001	36.02	4.05	-	0.17	1.82
Geochemistry, Phytoplankton & Color of the Ocean (Gep&CO)j	43.58	327.19	North Atlantic Ocean	5	surface	214200	4.284	22413	2.28135	236613	6.56535	0.104636	0.532527	21.121	36.05	4.72	-	0.19	2.01
Geochemistry, Phytoplankton & Color of the Ocean (Gep&CO)j	43.25	323.24	North Atlantic Ocean	5	surface	244430	4.8886	10591	1.20946	255021	6.09806	0.0433294	0.247404	20.98	35.95	3.19	-	0.17	4.29
Geochemistry, Phytoplankton & Color of the Ocean (Gep&CO)j	43.15	321.85	North Atlantic Ocean	5	surface	192090	3.8418	10574	0.990612	202664	4.83241	0.0550471	0.257851	21.062	36.14	5.02	-	0.19	2.18
Geochemistry, Phytoplankton & Color of the Ocean (Gep&CO)j	43	320.24	North Atlantic Ocean	5	surface	223053	4.46106	12572	1.69494	235625	6.156	0.0563633	0.379942	21.009	36	3.92	-	0.16	1.63
Geochemistry, Phytoplankton & Color of the Ocean (Gep&CO)j	42.88	318.65	North Atlantic Ocean	5	surface	300618	6.01236	10107	1.12802	310725	7.14038	0.0336207	0.187617	20.905	35.92	3.75	-	0.16	1.78
Geochemistry, Phytoplankton & Color of the Ocean (Gep&CO)j	42.78	317.27	North Atlantic Ocean	5	surface	244021	4.88042	10204	1.34735	254225	6.22777	0.0418161	0.276073	20.916	36.22	3.59	-	0.12	1.88
Geochemistry, Phytoplankton & Color of the Ocean (Gep&CO)j	42.46	313.62	North Atlantic Ocean	5	surface	226984	4.53968	11510	1.19793	238494	5.73761	0.0507084	0.26388	20.835	36.42	2.51	-	0.08	1.72
Geochemistry, Phytoplankton & Color of the Ocean (Gep&CO)j	41.88	306.63	North Atlantic Ocean	5	surface	257157	5.14314	19561	1.37659	276718	6.51973	0.0760664	0.267656	20.604	33.73	2.99	-	0.23	2.77
Geochemistry, Phytoplankton & Color of the Ocean (Gep&CO)j	41.53	302.34	North Atlantic Ocean	5	surface	308072	6.16144	11734	1.45366	319806	7.6151	0.0380885	0.235928	20.852	35.65	2.72	-	0.07	2.58
Geochemistry, Phytoplankton & Color of the Ocean (Gep&CO)j	41.42	300.92	North Atlantic Ocean	5	surface	271630	5.4326	10412	1.38609	282042	6.81869	0.0383316	0.255144	21.014	35.69	5.57	-	0.15	2.85
Geochemistry, Phytoplankton & Color of the Ocean (Gep&CO)j	35.83	285.09	North Atlantic Ocean	5	surface	552912	11.0582	50891	5.41671	603803	16.4749	0.0920418	0.489834	20.789	36.31	2.18	-	0.08	1.44
Geochemistry, Phytoplankton & Color of the Ocean (Gep&CO)j	34.73	284.65	North Atlantic Ocean	5	surface	393261	7.86522	49184	4.51945	442445	12.3847	0.125067	0.574612	20.481	36.55	0.76	-	0	1.16
Geochemistry, Phytoplankton & Color of the Ocean (Gep&CO)j	33.83	283.22	North Atlantic Ocean	5	surface	593561	11.8712	42995	4.67359	636556	16.5448	0.0724357	0.393691	20.697	36.6	0.65	-	0	1.24
Geochemistry, Phytoplankton & Color of the Ocean (Gep&CO)j	32.91	281.85	North Atlantic Ocean	5	surface	459129	9.18258	76987	8.69094	536116	17.8735	0.167681	0.94646	20.589	35.61	0.51	-	0	3.84
Geochemistry, Phytoplankton & Color of the Ocean (Gep&CO)j	32.56	281.3	North Atlantic Ocean	5	surface	410979	8.21958	71359	8.22134	482338	16.4409	0.173632	1.00021	20.638	36.56	0.88	-	0	0.99
Geochemistry, Phytoplankton & Color of the Ocean (Gep&CO)j	29.8	281.02	North Atlantic Ocean	5	surface	323942	6.47884	62719	6.16635	386661	12.6452	0.193612	0.951767	20.363	36.69	0.63	-	0.05	2.63
Geochemistry, Phytoplankton & Color of the Ocean (Gep&CO)j	28.68	281.87	North Atlantic Ocean	5	surface	330869	6.61738	70580	6.44724	401449	13.0646	0.213317	0.974289	20.54	36.82	0.27	-	0	0.84
Geochemistry, Phytoplankton & Color of the Ocean (Gep&CO)j	27.55	282.68	North Atlantic Ocean	5	surface	298937	5.97874	53692	4.26479	352629	10.2435	0.17961	0.713326	20.464	36.86	0.23	-	0	0.42
Geochemistry, Phytoplankton & Color of the Ocean (Gep&CO)j	26.33	283.55	North Atlantic Ocean	5	surface	281625	5.6325	48208	3.90798	329833	9.54048	0.171178	0.693828	20.259	36.77	0.14	-	0	0.96
Geochemistry, Phytoplankton & Color of the Ocean (Gep&CO)j	25.3	284.3	North Atlantic Ocean	5	surface	281722	5.63444	45588	4.03602	327310	9.67046	0.161819	0.716312	20.262	36.8	0.14	-	0	0.93
Geochemistry, Phytoplankton & Color of the Ocean (Gep&CO)j	22.83	285.35	North Atlantic Ocean	5	surface	319075	6.3815	93085	5.90222	412160	12.2837	0.291734	0.924895	20.063	36.32	0.12	-	0	1.21
Geochemistry, Phytoplankton & Color of the Ocean (Gep&CO)j	21.5	285.54	North Atlantic Ocean	5	surface	362651	7.25302	86418	4.41233	449069	11.6654	0.238295	0.608344	19.887	36	0.11	-	0	1.46
Geochemistry, Phytoplankton & Color of the Ocean (Gep&CO)j	20.12	285.98	North Atlantic Ocean	5	surface	366982	7.33964	113380	4.98373	480362	12.3234	0.308952	0.679015	19.779	35.72	0.13	-	0	1.53
Geochemistry, Phytoplankton & Color of the Ocean (Gep&CO)j	18.8	285.29	North Atlantic Ocean	5	surface	359422	7.18844	102775	5.13564	462197	12.3241	0.285945	0.71443	19.754	35.73	0.08	-	0	1.28
Geochemistry, Phytoplankton & Color of the Ocean (Gep&CO)j	17.75	284.7	North Atlantic Ocean	5	surface	330626	6.61252	177390	8.67865	508016	15.2912	0.536528	1.31246	19.515	35.14	0.13	-	0	2.3
Geochemistry, Phytoplankton & Color of the Ocean (Gep&CO)j	15.27	283.3	North Atlantic Ocean	5	surface	392762	7.85524	154471	6.23415	547233	14.0894	0.393294	0.793629	19.576	35.19	0.14	-	0	2.26
Geochemistry, Phytoplankton & Color of the Ocean (Gep&CO)j	13.93	282.59	North Atlantic Ocean	5	surface	574011	11.4802	180554	9.78193	754565	21.2621	0.314548	0.852068	20.433	36.56	0.13	-	0.01	1
Geochemistry, Phytoplankton & Color of the Ocean (Gep&CO)j	12.65	281.85	North Atlantic Ocean	5	surface	432048	8.64096	100156	6.7143	532204	15.3553	0.231817	0.777031	20.288	36.38	0.23	-	0.02	1.2
Geochemistry, Phytoplankton & Color of the Ocean (Gep&CO)j	11.33	281.15	North Atlantic Ocean	5	surface	319960	6.3992	112670	4.62349	432630	11.0227	0.352138	0.722511	19.976	36.07	0.18	-	0.02	1.21
Geochemistry, Phytoplankton & Color of the Ocean (Gep&CO)j	10.25	280.55	North Pacific Ocean	5	surface	308488	6.16976	132086	5.38607	440574	11.5558	0.428172	0.872978	19.878	35.91	0.13	-	0	1.98
Geochemistry, Phytoplankton & Color of the Ocean (Gep&CO)j	7.05	280.02	North Pacific Ocean	5	surface	613165	12.2633	90430	19.0536	703595	31.3169	0.147481	1.55371	17.927	31.41	0.2	-	0.08	0.74
Geochemistry, Phytoplankton & Color of the Ocean (Gep&CO)j	6.03	277.32	North Pacific Ocean	5	surface	407303	8.14606	206546	23.0854	613849	31.2314	0.507107	2.83393	18.433	32.49	0.19	-	0.09	1.39
Geochemistry, Phytoplankton & Color of the Ocean (Gep&CO)j	5.6	276.07	North Pacific Ocean	5	surface	386993	7.73986	167821	7.71254	554814	15.4524	0.433654	0.99647	18.293	32.93	0.15	-	0.1	1.2
Geochemistry, Phytoplankton & Color of the Ocean (Gep&CO)j	5.12	274.72	North Pacific Ocean	5	surface	418542	8.37084	170194	19.0482	588736	27.4191	0.406635	2.27555	17.525	30.68	0.12	-	0.05	1.38
Geochemistry, Phytoplankton & Color of the Ocean (Gep&CO)j	4.63	273.35	North Pacific Ocean	5	surface	772543	15.4509	174239	26.9823	946782	42.4332	0.22554	1.74633	17.499	30.54	0.13	-	0.05	0.79
Geochemistry, Phytoplankton & Color of the Ocean (Gep&CO)j	4.23	272.25	North Pacific Ocean	5	surface	678540	13.5708	249957	24.2541	928497	37.8249	0.368375	1.78723	17.655	30.83	0.32	-	0.07	1.09
Geochemistry, Phytoplankton & Color of the Ocean (Gep&CO)j	3.17	269.29	North Pacific Ocean	5	surface	646005	12.9201	224658	11.6222	870663	24.5423	0.347765	0.899544	18.745	33.13	0.05	-	0.1	1.53
Geochemistry, Phytoplankton & Color of the Ocean (Gep&CO)j	2.7	267.95	North Pacific Ocean	5	surface	633864	12.6773	158552	7.52846	792416	20.2057	0.250136	0.593855	18.688	33.1	0.15	-	0.09	1.35
Geochemistry, Phytoplankton & Color of the Ocean (Gep&CO)j	2.25	266.72	North Pacific Ocean	5	surface	792992	15.8598	105644	9.66662	898636	25.5265	0.133222	0.609503	18.892	33.34	0.11	-	0.15	2.06
Geochemistry, Phytoplankton & Color of the Ocean (Gep&CO)j	1.71	265.22	North Pacific Ocean	5	surface	1110000	22.2	161562	25.0293	1271562	47.2293	0.145551	1.12744	19.238	33.63	0.41	-	0.16	0.57
Geochemistry, Phytoplankton & Color of the Ocean (Gep&CO)j	1.32	264.1	North Pacific Ocean	5	surface	1220000	24.4	222962	36.3889	1442962	60.7889	0.182756	1.49135	19.312	33.75	0.52	-	0.2	1.53
Geochemistry, Phytoplankton & Color of the Ocean (Gep&CO)j	0.23	261.07	North Pacific Ocean	5	surface	991920	19.8384	91468	7.68393	1083388	27.5223	0.0922131	0.387326	20.538	34.7	10.85	-	0.62	4.52
Geochemistry, Phytoplankton & Color of the Ocean (Gep&CO)j	-0.23	259.73	South Pacific Ocean	5	surface	820213	16.4043	174619	9.10898	994832	25.5132	0.212895	0.555281	20.68	34.96	8.95	-	0.58	3.85
Geochemistry, Phytoplankton & Color of the Ocean (Gep&CO)j	-0.7	258.45	South Pacific Ocean	5	surface	1240000	24.8	185732	10.9627	1425732	35.7627	0.149784	0.442045	20.65	34.98	8.46	-	0.58	4.01
Geochemistry, Phytoplankton & Color of the Ocean (Gep&CO)j	-1.17	257.15	South Pacific Ocean	5	surface	1060000	21.2	199055	10.5192	1259055	31.7192	0.187788	0.49619	20.567	34.96	11.11	-	0.64	4.83
Geochemistry, Phytoplankton & Color of the Ocean (Gep&CO)j	-1.58	256	South Pacific Ocean	5	surface	774954	15.4991	97204	6.24428	872158	21.7434	0.125432	0.402881	20.592	34.93	11.34	-	0.64	4.9
Geochemistry, Phytoplankton & Color of the Ocean (Gep&CO)j	-2.58	253.2	South Pacific Ocean	5	surface	641633	12.8327	186625	9.59013	828258	22.4228	0.290859	0.747322	20.553	34.96	11.61	-	0.7	4.98
Geochemistry, Phytoplankton & Color of the Ocean (Gep&CO)j	-3.08	251.77	South Pacific Ocean	5	surface	772366	15.4473	95488	4.70703	867854	20.1544	0.123631	0.304715	20.638	35.03	11.41	-	0.68	4.74
Geochemistry, Phytoplankton & Color of the Ocean (Gep&CO)j	-3.56	250.45	South Pacific Ocean	5	surface	795068	15.9014	109721	5.01455	904789	20.9159	0.138002	0.315354	20.614	35.05	12.82	-	0.73	4.59
Geochemistry, Phytoplankton & Color of the Ocean (Gep&CO)j	-4.08	248.98	South Pacific Ocean	5	surface	696619	13.9324	115062	5.31981	811681	19.2522	0.165172	0.381831	20.635	35.01	11.59	-	0.69	3.98
Geochemistry, Phytoplankton & Color of the Ocean (Gep&CO)j	-4.51	247.77	South Pacific Ocean	5	surface	769367	15.3873	121797	5.55068	891164	20.938	0.158308	0.36073	20.608	34.96	9.57	-	0.6	3.32
Geochemistry, Phytoplankton & Color of the Ocean (Gep&CO)j	-5.58	244.87	South Pacific Ocean	5	surface	602396	12.0479	80581	3.5677	682977	15.6156	0.133767	0.296126	20.477	35.05	8.19	-	0.55	3.12
Geochemistry, Phytoplankton & Color of the Ocean (Gep&CO)j	-6.05	243.47	South Pacific Ocean	5	surface	417217	8.34434	220625	8.85905	637842	17.2034	0.528802	1.06168	20.51	34.99	11.04	-	0.62	3.38
Geochemistry, Phytoplankton & Color of the Ocean (Gep&CO)j	-6.51	242.17	South Pacific Ocean	5	surface	786968	15.7394	70060	3.52843	857028	19.2678	0.0890252	0.224179	20.384	35.2	6.3	-	0.46	2
Geochemistry, Phytoplankton & Color of the Ocean (Gep&CO)j	-8.38	236.93	South Pacific Ocean	5	surface	694473	13.8895	169329	9.07673	863802	22.9662	0.243824	0.653498	20.361	35.22	8.45	-	0.52	4.27
Geochemistry, Phytoplankton & Color of the Ocean (Gep&CO)j	-8.83	235.63	South Pacific Ocean	5	surface	595969	11.9194	86016	4.95827	681985	16.8777	0.14433	0.415984	20.382	35.37	8	-	0.48	2.29
Geochemistry, Phytoplankton & Color of the Ocean (Gep&CO)j	-9.3	234.32	South Pacific Ocean	5	surface	516086	10.3217	75245	4.09776	591331	14.4195	0.145799	0.397003	20.334	35.51	6.91	-	0.45	1.83
Geochemistry, Phytoplankton & Color of the Ocean (Gep&CO)j	-9.83	232.8	South Pacific Ocean	5	surface	493009	9.86018	91033	4.87045	584042	14.7306	0.184648	0.493952	20.312	35.5	8.33	-	0.64	2.64
Geochemistry, Phytoplankton & Color of the Ocean (Gep&CO)j	-10.23	231.67	South Pacific Ocean	5	surface	594227	11.8845	169845	9.36648	764072	21.251	0.285825	0.788123	20.297	35.6	6.46	-	0.42	2.01
Geochemistry, Phytoplankton & Color of the Ocean (Gep&CO)j	-11.28	228.68	South Pacific Ocean	5	surface	656819	13.1364	277200	14.5588	934019	27.6952	0.422034	1.10828	20.161	35.86	2.46	-	0.25	1.23
Geochemistry, Phytoplankton & Color of the Ocean (Gep&CO)j	-11.75	227.35	South Pacific Ocean	5	surface	590172	11.8034	216432	11.2828	806604	23.0862	0.366727	0.95589	20.162	35.9	2.19	-	0.44	2.83
Geochemistry, Phytoplankton & Color of the Ocean (Gep&CO)j	-12.23	225.98	South Pacific Ocean	5	surface	829538	16.5908	70796	5.97823	900334	22.569	0.0853439	0.360335	20.141	35.81	2.25	-	0.43	2.32
Geochemistry, Phytoplankton & Color of the Ocean (Gep&CO)j	-12.75	224.52	South Pacific Ocean	5	surface	446664	8.93328	235155	11.4829	681819	20.4162	0.52647	1.28541	20.068	35.88	1.31	-	0.2	1.07
Geochemistry, Phytoplankton & Color of the Ocean (Gep&CO)j	-13.15	223.37	South Pacific Ocean	5	surface	606805	12.1361	300811	16.0695	907616	28.2056	0.495729	1.32411	20.057	35.83	1.53	-	0.2	1.02
Geochemistry, Phytoplankton & Color of the Ocean (Gep&CO)j	-14.1	220.62	South Pacific Ocean	5	surface	563113	11.2623	321791	18.5624	884904	29.8247	0.57145	1.6482	19.956	35.83	0.53	-	0.2	1.15
Geochemistry, Phytoplankton & Color of the Ocean (Gep&CO)j	-14.63	219.29	South Pacific Ocean	5	surface	548787	10.9757	216171	9.94808	764958	20.9238	0.393907	0.90637	20.032	36.03	0.16	-	0.15	0.4
Geochemistry, Phytoplankton & Color of the Ocean (Gep&CO)j	-15.15	218.04	South Pacific Ocean	5	surface	486841	9.73682	229154	11.2915	715995	21.0283	0.470696	1.15967	20.053	36.05	0.16	-	0.26	1.43
Geochemistry, Phytoplankton & Color of the Ocean (Gep&CO)j	-15.73	216.7	South Pacific Ocean	5	surface	525137	10.5027	147675	6.97775	672812	17.4805	0.281212	0.664374	20.013	35.94	0.04	-	0.11	0.5
Geochemistry, Phytoplankton & Color of the Ocean (Gep&CO)j	-16.2	215.6	South Pacific Ocean	5	surface	503022	10.0604	108358	6.26547	611380	16.3259	0.215414	0.622783	20.019	35.94	0.06	-	0.14	0.64
Geochemistry, Phytoplankton & Color of the Ocean (Gep&CO)j	-17.75	210.02	South Pacific Ocean	5	surface	512973	10.2595	164221	6.15506	677194	16.4145	0.320136	0.59994	20.008	36.01	0.06	-	0.12	0.76
Geochemistry, Phytoplankton & Color of the Ocean (Gep&CO)j	-18.35	208.98	South Pacific Ocean	5	surface	405942	8.11884	107047	3.93973	512989	12.0586	0.2637	0.485258	19.935	35.89	0.06	-	0.11	0.73
Geochemistry, Phytoplankton & Color of the Ocean (Gep&CO)j	-19.85	206.42	South Pacific Ocean	5	surface	414231	8.28462	84934	3.10394	499165	11.3886	0.20504	0.374662	19.816	35.76	0.06	-	0.12	0.79
Geochemistry, Phytoplankton & Color of the Ocean (Gep&CO)j	-20.53	205.22	South Pacific Ocean	5	surface	412335	8.2467	7243	0.317148	419578	8.56385	0.0175658	0.0384576	19.835	35.62	0.06	-	0.09	0.6
Geochemistry, Phytoplankton & Color of the Ocean (Gep&CO)j	-21.28	203.93	South Pacific Ocean	5	surface	421370	8.4274	4891	0.178673	426261	8.60607	0.0116074	0.0212014	19.775	35.57	0.09	-	0.1	0.71
Geochemistry, Phytoplankton & Color of the Ocean (Gep&CO)j	-22.03	202.6	South Pacific Ocean	5	surface	410087	8.20174	5207	0.245768	415294	8.44751	0.0126973	0.0299653	19.635	35.38	0.23	-	0.34	2.49
Geochemistry, Phytoplankton & Color of the Ocean (Gep&CO)j	-24.27	198.63	South Pacific Ocean	5	surface	402930	8.0586	34503	1.34087	437433	9.39947	0.0856303	0.16639	19.77	35.25	0.06	-	0.03	0.54
Geochemistry, Phytoplankton & Color of the Ocean (Gep&CO)j	-24.93	197.47	South Pacific Ocean	5	surface	407532	8.15064	30436	1.2182	437968	9.36884	0.0746837	0.149461	19.569	34.99	0.06	-	0.03	0.46
Geochemistry, Phytoplankton & Color of the Ocean (Gep&CO)j	-25.65	196.19	South Pacific Ocean	5	surface	451340	9.0268	26696	0.987398	478036	10.0142	0.0591483	0.109385	19.691	35.15	0.08	-	0.02	0.42
Geochemistry, Phytoplankton & Color of the Ocean (Gep&CO)j	-26.43	194.75	South Pacific Ocean	5	surface	491539	9.83078	35465	1.38056	527004	11.2113	0.0721509	0.140432	19.645	35.06	1.37	-	2.37	10.83
Geochemistry, Phytoplankton & Color of the Ocean (Gep&CO)j	-27.07	193.6	South Pacific Ocean	5	surface	421576	8.43152	152134	5.64289	573710	14.0744	0.36087	0.669261	19.427	34.94	0.2	-	0.24	2.77
Geochemistry, Phytoplankton & Color of the Ocean (Gep&CO)j	-28.55	190.87	South Pacific Ocean	5	surface	327770	6.5554	163099	6.29983	490869	12.8552	0.497602	0.961014	20.012	35.44	0.7	-	1.18	9.95
Geochemistry, Phytoplankton & Color of the Ocean (Gep&CO)j	-29.28	189.5	South Pacific Ocean	5	surface	374719	7.49438	107664	4.13485	482383	11.6292	0.287319	0.551726	19.946	35.34	0.16	-	0.14	1.57
Geochemistry, Phytoplankton & Color of the Ocean (Gep&CO)j	-29.96	188.2	South Pacific Ocean	5	surface	271003	5.42006	194461	7.26894	465464	12.689	0.71756	1.34112	19.888	35.42	0.29	-	0.37	3.29
Geochemistry, Phytoplankton & Color of the Ocean (Gep&CO)j	-30.7	186.83	South Pacific Ocean	5	surface	413916	8.27832	74148	3.09692	488064	11.3752	0.179138	0.374101	20.061	35.47	0.08	-	0.02	0.45
Geochemistry, Phytoplankton & Color of the Ocean (Gep&CO)j	-31.32	185.68	South Pacific Ocean	5	surface	525081	10.5016	76611	3.33327	601692	13.8349	0.145903	0.317405	20.156	35.55	0.3	-	0.39	3.73
Geochemistry, Phytoplankton & Color of the Ocean (Gep&CO)j	-32.73	182.93	South Pacific Ocean	5	surface	592276	11.8455	64091	2.47367	656367	14.3192	0.108211	0.208828	20.331	35.57	0.37	-	0.57	5.08
Geochemistry, Phytoplankton & Color of the Ocean (Gep&CO)j	-33.42	181.63	South Pacific Ocean	5	surface	603161	12.0632	79045	3.62937	682206	15.6926	0.131051	0.300862	20.297	35.57	0.08	-	0.06	0.59
Geochemistry, Phytoplankton & Color of the Ocean (Gep&CO)j	-34.13	180.2	South Pacific Ocean	5	surface	500397	10.0079	37423	1.81787	537820	11.8258	0.0747866	0.181643	20.236	35.59	0.3	-	0.41	3.85
Geochemistry, Phytoplankton & Color of the Ocean (Gep&CO)j	-35.56	177.35	South Pacific Ocean	5	surface	206137	4.12274	128038	4.94084	334175	9.06358	0.621131	1.19844	20.291	35.57	0.09	-	0.08	0.66
Geochemistry, Phytoplankton & Color of the Ocean (Gep&CO)j	-36.48	175	South Pacific Ocean	5	surface	428164	8.56328	80362	5.21024	508526	13.7735	0.18769	0.60844	20.122	35.35	1.56	-	2.51	10.63
Geochemistry, Phytoplankton & Color of the Ocean (Gep&CO)j	-35.25	174.48	South Pacific Ocean	5	surface	672022	13.4404	93446	6.56222	765468	20.0027	0.139052	0.488244	20.213	35.62	0.09	-	0.06	0.48
Geochemistry, Phytoplankton & Color of the Ocean (Gep&CO)j	-34.13	173.73	South Pacific Ocean	5	surface	527860	10.5572	25924	1.01573	553784	11.5729	0.0491115	0.0962122	20.097	35.7	0.23	-	0.29	2.67
Geochemistry, Phytoplankton & Color of the Ocean (Gep&CO)j	-32.85	172.86	South Pacific Ocean	5	surface	482307	9.64614	71018	2.9978	553325	12.6439	0.147246	0.310777	20.095	35.68	0.11	-	0.05	0.53
Geochemistry, Phytoplankton & Color of the Ocean (Gep&CO)j	-31.73	172.13	South Pacific Ocean	5	surface	326122	6.52244	144375	5.3647	470497	11.8871	0.442702	0.822499	20.119	35.63	0.22	-	0.1	1.14
Geochemistry, Phytoplankton & Color of the Ocean (Gep&CO)j	-28.88	170.3	South Pacific Ocean	5	surface	405914	8.11828	105147	4.32089	511061	12.4392	0.259038	0.532242	19.784	35.48	0.25	-	0.28	2.58
Geochemistry, Phytoplankton & Color of the Ocean (Gep&CO)j	-27.71	169.56	South Pacific Ocean	5	surface	496328	9.92656	92145	3.52286	588473	13.4494	0.185653	0.354892	19.9	35.68	0.22	-	0.23	2.06
Geochemistry, Phytoplankton & Color of the Ocean (Gep&CO)j	-26.43	168.75	South Pacific Ocean	5	surface	516546	10.3309	41241	1.64759	557787	11.9785	0.0798399	0.159481	19.848	35.64	0.4	-	0.55	4.09
Geochemistry, Phytoplankton & Color of the Ocean (Gep&CO)j	-25.18	167.98	South Pacific Ocean	5	surface	571047	11.4209	61484	2.58196	632531	14.0029	0.107669	0.226072	19.246	35.05	0.16	-	0.13	1.19
Geochemistry, Phytoplankton & Color of the Ocean (Gep&CO)j	-24.27	167.43	South Pacific Ocean	5	surface	446105	8.9221	92650	3.81245	538755	12.7345	0.207687	0.427304	19.211	34.81	0.11	-	0	0.33
Geochemistry, Phytoplankton & Color of the Ocean (Gep&CO)j	48.95	354.47	North Atlantic Ocean	5	surface	661937	13.2387	17737	2.48725	679674	15.726	0.0267956	0.187877	21.197	35.4	3.89	-	0.14	1.81
Geochemistry, Phytoplankton & Color of the Ocean (Gep&CO)j	48.12	352.4	North Atlantic Ocean	5	surface	649885	12.9977	2099	0.00543641	651984	13.0031	0.0032298	0.000418259	21.134	35.53	4.1	-	0.17	1.56
Geochemistry, Phytoplankton & Color of the Ocean (Gep&CO)j	47.43	350.77	North Atlantic Ocean	5	surface	661749	13.235	39630	0.889404	701379	14.1244	0.0598868	0.067201	21.023	35.58	3.95	-	0.19	1.79
Geochemistry, Phytoplankton & Color of the Ocean (Gep&CO)j	46.78	349.2	North Atlantic Ocean	5	surface	663718	13.2744	49480	7.53563	713198	20.81	0.0745497	0.567683	21.099	35.61	5.4	-	0.26	1.81
Geochemistry, Phytoplankton & Color of the Ocean (Gep&CO)j	46.08	347.55	North Atlantic Ocean	5	surface	534905	10.6981	51121	0.480224	586026	11.1783	0.0955702	0.0448888	21.097	35.59	4.69	-	0.27	2.03
Geochemistry, Phytoplankton & Color of the Ocean (Gep&CO)j	44.9	343.72	North Atlantic Ocean	5	surface	876457	17.5291	83207	11.2738	959664	28.803	0.0949356	0.643149	20.931	35.64	2.03	-	0.17	0
Geochemistry, Phytoplankton & Color of the Ocean (Gep&CO)j	44.76	342.12	North Atlantic Ocean	5	surface	813846	16.2769	114545	18.6774	928391	34.9543	0.140745	1.14748	20.898	35.7	2.67	-	0.17	1.44
Geochemistry, Phytoplankton & Color of the Ocean (Gep&CO)j	44.61	340.29	North Atlantic Ocean	5	surface	484419	9.68838	91124	9.50728	575543	19.1957	0.18811	0.981308	20.962	35.77	3.22	-	0.2	1.57
Geochemistry, Phytoplankton & Color of the Ocean (Gep&CO)j	44.46	338.39	North Atlantic Ocean	5	surface	478162	9.56324	75572	7.15846	553734	16.7217	0.158047	0.748539	20.967	35.79	3.42	-	0.21	1.61
Geochemistry, Phytoplankton & Color of the Ocean (Gep&CO)j	44.46	336.78	North Atlantic Ocean	5	surface	394257	7.88514	81943	2.94785	476200	10.833	0.207842	0.373849	20.864	35.79	2.11	-	0.18	2.67
Geochemistry, Phytoplankton & Color of the Ocean (Gep&CO)j	44.02	332.8	North Atlantic Ocean	5	surface	656273	13.1255	63098	8.18498	719371	21.3104	0.096146	0.623596	20.959	35.93	3.36	-	0.18	1.92
Geochemistry, Phytoplankton & Color of the Ocean (Gep&CO)j	43.88	331.05	North Atlantic Ocean	5	surface	758730	15.1746	63539	9.42528	822269	24.5999	0.0837439	0.621122	20.925	35.94	3.32	-	0.19	1.69
Geochemistry, Phytoplankton & Color of the Ocean (Gep&CO)j	43.75	329.35	North Atlantic Ocean	5	surface	1147196	22.9439	73284	11.6323	1220480	34.5762	0.063881	0.506989	20.946	35.85	2.84	-	0.1	1.56
Geochemistry, Phytoplankton & Color of the Ocean (Gep&CO)j	43.6	327.62	North Atlantic Ocean	5	surface	591249	11.825	58666	8.77215	649915	20.5971	0.0992238	0.741832	20.92	36.02	2.87	-	0.23	1.89
Geochemistry, Phytoplankton & Color of the Ocean (Gep&CO)j	43.48	326.07	North Atlantic Ocean	5	surface	661542	13.2308	43423	7.4879	704965	20.7187	0.0656391	0.565943	20.922	36.03	2.77	-	0.16	1.51
Geochemistry, Phytoplankton & Color of the Ocean (Gep&CO)j	43.15	322.12	North Atlantic Ocean	5	surface	476181	9.52362	49948	6.14332	526129	15.6669	0.104893	0.645062	20.832	36.12	2.44	-	0.14	3.34
Geochemistry, Phytoplankton & Color of the Ocean (Gep&CO)j	43.02	320.37	North Atlantic Ocean	5	surface	488535	9.7707	44447	6.64076	532982	16.4115	0.0909802	0.679661	21.006	36.06	4.11	-	0.21	2.41
Geochemistry, Phytoplankton & Color of the Ocean (Gep&CO)j	42.85	318.52	North Atlantic Ocean	5	surface	427126	8.54252	27019	3.88148	454145	12.424	0.0632577	0.454372	21.063	36	2.95	-	0.21	2.76
Geochemistry, Phytoplankton & Color of the Ocean (Gep&CO)j	42.71	316.67	North Atlantic Ocean	5	surface	389565	7.7913	19097	2.04666	408662	9.83796	0.0490213	0.262685	20.965	36.29	1.7	-	0.13	2.31
Geochemistry, Phytoplankton & Color of the Ocean (Gep&CO)j	42.27	311.12	North Atlantic Ocean	5	surface	699597	13.9919	8299	0.490725	707896	14.4827	0.0118625	0.0350719	20.831	34.8	1.76	-	0.26	1.5
Geochemistry, Phytoplankton & Color of the Ocean (Gep&CO)j	42.12	309.44	North Atlantic Ocean	5	surface	327138	6.54276	12405	1.9247	339543	8.46746	0.0379198	0.294172	20.166	33.12	-	-	0.23	2.18
Geochemistry, Phytoplankton & Color of the Ocean (Gep&CO)j	41.98	307.72	North Atlantic Ocean	5	surface	750000	15	4513	0.0116887	754513	15.0117	0.00601733	0.000779245	21.151	35.67	5.01	-	0.33	2.34
Geochemistry, Phytoplankton & Color of the Ocean (Gep&CO)j	41.83	305.98	North Atlantic Ocean	5	surface	442898	8.85796	11982	1.78503	454880	10.643	0.0270536	0.201517	21.097	35.37	6.81	-	0.42	3.44
[truncated: 1,538 more rows]

## Sheet: references
References
a=	Ribeiro, C. G., Dos Santos, A. L., Marie, D., Pellizari, V. H., Brandini, F. P., & Vaulot, D. (2016). Pico and nanoplankton abundance and carbon stocks along the Brazilian Bight. PeerJ, 4, e2587.
b=	Bergo, N. M., Signori, C. N., Amado, A. M., Brandini, F. P. & Pellizari, V. H. (2017). The partitioning of carbon biomass among the pico- and nano-plankton community in the South Brazilian Bight during a strong summer intrusion of South Atlantic Central Water. Frontiers in Marine Science, 4, 238.
c=	Otero-Ferrer, J. L., Cermeño, P., Bode, A., Fernández-Castro, B., Gasol, J. M., Morán, X. A. G., ... & Mouriño-Carballido, B. (2018). Factors controlling the community structure of picoplankton in contrasting marine environments. Biogeosciences, 15(20), 6199-6220.
d=	Sunagawa, S., Coelho, L. P., Chaffron, S., Kultima, J. R., Labadie, K., Salazar, G., ... & Velayoudon, D. (2015). Structure and function of the global ocean microbiome. Science, 348(6237), 1261359.
e=	Bouvy, M., Belieres, A., Carré, C., Got, P., Pagano, M., Agogué, H., ... & Dupuy, C. (2022). Do microbial planktonic communities reflect the ecological changes of Glorieuses coral reefs (Iles Eparses, Western Indian Ocean)?. Marine Pollution Bulletin, 174, 113218.
f =	Hahnke, R. L., Probian, C., Fuchs, B. M., & Harder, J. (2013). Variations in pelagic bacterial communities in the North Atlantic Ocean coincide with water bodies. Aquatic microbial ecology, 71(2), 131-140.
g=	Ferreira, J. C. N., Bergo, N. M., Tura, P. M., Chuqui, M. G., Brandini, F. P., Jovane, L., & Pellizari, V. H. (2022). Abundance and microbial diversity from surface to deep water layers over the Rio Grande Rise, South Atlantic. Progress in Oceanography, 201, 102736.
h=	Giebel, H. A., Arnosti, C., Badewien, T. H., Bakenhus, I., Balmonte, J. P., Billerbeck, S., ... & Simon, M. (2021). Microbial growth and organic matter cycling in the Pacific Ocean along a latitudinal transect between subarctic and subantarctic waters. Frontiers in Marine Science, 8, 764383.
i=	Atlantic Meridional Transect Project Data base -British Oceanographic Data Centre (BODC) — oceanographic and marine data
j=	Geochemistry, Phytoplankton & Color of the Ocean (Gep&CO) Data base. http://www.lodyc.jussieu.fr/gepco
k=	Duhamel, S. (2016). Flow cytometry cell counts obtained during the R/V L'Atalante OUTPACE cruise between New Caledonia and Tahiti from February to April 2015. https://www.bco-dmo.org/dataset/663918
l=	Ward, B. B., Casciotti, K. L. (2021) Bottle data from CTD casts conducted on R/V Sally Ride cruise SR1805 in the Eastern Tropical North Pacific Ocean from March to April 2018. Biological and Chemical Oceanography Data Management Office (BCO-DMO). (Version 1) Version Date 2021-06-18 . doi:10.26008/1912/bco-dmo.854091.1 [03/11/2023]
m=	Biological & Chemical Oceanography Data Management Office (CO-DMO). https://www.bco-dmo.org/project/2237
n=	Landry, M. R., Selph, K. E., Taylor, A. G., Decima, M., Balch, W. M., & Bidigare, R. R. (2011). Phytoplankton growth, grazing and production balances in the HNLC equatorial Pacific. Deep Sea Research Part II: Topical Studies in Oceanography, 58(3-4), 524-535.
o=	Hawaii Ocean Time-series (HOT) Data base. https://hahana.soest.hawaii.edu/FTP/hot/ctd/aloha_mean/?C=D;O=A
