# Supplementary material for: Long-term responses of microbial plankton to ocean warming reveal shifts in air–sea CO₂ exchange in the late 21st century
Source: Research Square preprint supplement (doi:10.21203/rs.3.rs-7284245/v1), 2025-08-12
Supplement: Supplementary file 2 [file 705c14d0ab2aad2755cf6209.xlsx]

## Sheet: projections_SSP1-2.6
longitude	latitude	temperature	heterotrophic bacteria (µgC L-1)	autotrophic picoplankton (µgC L-1)	total picoplankton (µgC L-1)	ratio (AP:HB)
-30.68	9.56	28.6995	10.6914	7.16894	18.6404	0.782821
-47.3	-27.2	20.6177	7.76731	3.1723	11.1728	0.412002
-30.06	8.53	28.9379	10.804	7.24893	18.8572	0.786749
-20.02	41.49	18.493	7.61959	2.44402	10.2214	0.326595
-30.06	8.53	28.9479	10.8087	7.25214	18.8662	0.786894
-16.28	44.9	22.248	8.09139	3.91916	12.3177	0.493058
-100.56	-0.35	18.5115	7.61953	2.44898	10.2269	0.327214
12	-18.99	12.0511	8.77235	2.19896	11.0067	0.261243
-9.02	47.55	20.3717	7.73413	3.0725	11.03	0.400766
-30.68	9.56	26.8995	9.83952	6.39683	16.8508	0.728703
-32.29	12.24	27.6272	10.1814	6.73952	17.5989	0.755181
17.88	-32.24	8.65325	9.67097	2.80216	12.4851	0.313115
-45.46	-25.42	14.4059	8.14381	1.97355	10.1827	0.251627
-32.29	12.24	27.5072	10.1246	6.68544	17.4772	0.751195
-63.73	40.68	19.8335	7.67625	2.86766	10.7467	0.377322
-179.73	-34.37	17.6927	7.64402	2.25385	10.0326	0.302144
-136.63	-13.15	20.1626	7.70925	2.9907	10.9151	0.391468
-140.58	-9.11	26.4791	9.64629	6.1851	16.4113	0.711157
179.45	-50.48	9.34001	9.51859	2.68179	12.2156	0.301582
-21.47	21.76	23.7595	8.54351	4.71076	13.6443	0.574152
-14.01	44.68	18.3121	7.62138	2.39683	10.1706	0.320668
-8.77	42.36	15.5361	7.90781	1.9819	9.97482	0.259923
66.49	18.57	28.1383	10.4246	6.95722	18.1071	0.770252
-29	5.98	29.0017	10.8339	7.26923	18.9141	0.787647
-30	55.25	14.076	8.2227	1.98691	10.2699	0.250907
-17.43	41.08	19.9631	7.68835	2.91526	10.8112	0.382819
-44.7	-27.4	19.5011	7.65059	2.75079	10.5922	0.363677
-44.7	-27.4	19.1011	7.6299	2.62032	10.4274	0.348165
-131.32	-11.28	20.2155	7.71526	3.01112	10.9436	0.393797
-45.4	-26.3	20.8619	7.80437	3.27498	11.3227	0.423449
-20	16.38	19.7942	7.67282	2.85346	10.7276	0.375674
-21.01	13.8	24.2973	8.73563	5.00505	14.1639	0.603096
-98.93	0.23	18.5283	7.61949	2.45351	10.2319	0.327778
-85.28	5.12	17.6471	7.64668	2.24448	10.0247	0.300892
-25	-2.24	26.1462	9.49637	6.01193	16.0619	0.696288
110	-12.5	27.0397	9.90479	6.46543	16.9966	0.734214
-36.46	19.05	25.8519	9.36655	5.85563	15.7533	0.682522
-113.53	-4.98	19.5275	7.65234	2.75976	10.6039	0.364733
-121.81	-7.93	19.9812	7.69013	2.92199	10.8204	0.383594
-30	55.25	14.076	8.2227	1.98691	10.2699	0.250907
-30	55.25	14.076	8.2227	1.98691	10.2699	0.250907
110	-12.5	27.0397	9.90479	6.46543	16.9966	0.734214
-14.01	44.68	16.8721	7.71205	2.10919	9.9351	0.281948
-85	5.22	18.9015	7.62372	2.55947	10.3538	0.340809
-79.68	8.13	16.9094	7.70804	2.11467	9.93746	0.282757
-83.83	5.64	19.1552	7.63205	2.63728	10.4483	0.3502
-13.14	-2.12	20.8387	7.80067	3.26507	11.3081	0.422348
-20	16.38	19.7942	7.67282	2.85346	10.7276	0.375674
-12.27	46.18	21.2864	7.87856	3.4617	11.602	0.443998
177.53	-52.12	9.12953	9.56788	2.71982	12.3019	0.30516
-64.51	40.98	20.1786	7.71104	2.99683	10.9237	0.392168
-25	-10.6	26.1961	9.51866	6.03817	16.1143	0.698568
73.89	6.03	29.6069	11.1147	7.43683	19.4268	0.79272
-80.51	31.95	20.7375	7.78498	3.22223	11.2453	0.417582
170	-28.41	18.671	7.61999	2.49283	10.2761	0.33265
-25	-10.6	26.2061	9.52313	6.04341	16.1248	0.699022
-14.06	46.49	13.2791	8.42802	2.04572	10.523	0.252115
-45.5	-28.4	20.1899	7.71232	3.0012	10.9298	0.392666
-13.2	-1.37	22.1502	8.06696	3.87066	12.2399	0.487936
-58.12	40.8	20.5369	7.75595	3.13912	11.125	0.408278
-28.21	-3.92	24.6735	8.87866	5.21228	14.5386	0.623061
-47.8	-30.7	21.2868	7.87865	3.46191	11.6023	0.44402
-83.95	5.6	19.042	7.62778	2.60199	10.405	0.345958
-25	-2.24	24.5262	8.82184	5.13108	14.3909	0.615281
-14.06	46.49	13.2191	8.44419	2.05156	10.5443	0.252366
-28.21	-3.92	22.3835	8.12623	3.98701	12.4272	0.500192
159.9	-18	27.1646	9.9632	6.52557	17.1258	0.738966
168.57	-26.14	18.4553	7.61978	2.43398	10.2104	0.325341
-20.42	35.67	17.8554	7.63563	2.28861	10.0635	0.306742
-176.48	-10.33	30.5412	11.5269	7.59313	20.102	0.786773
-25	-10.6	26.2061	9.52313	6.04341	16.1248	0.699022
179.58	57	3.25178	9.20324	2.478	11.6827	0.302523
-107.22	-2.73	18.8152	7.6219	2.53407	10.3238	0.337713
-21.56	22.17	24.2201	8.70713	4.96261	14.0881	0.598964
66.53	18.57	28.1483	10.4293	6.96126	18.1168	0.770514
-93.28	2.25	17.4524	7.65955	2.2062	9.99412	0.29571
-100.27	-0.23	18.5564	7.61948	2.46114	10.2404	0.328728
-95.4	1.44	17.8092	7.63784	2.27853	10.0543	0.305415
-25	-10.6	26.2061	9.52313	6.04341	16.1248	0.699022
164.59	-19.22	28.8311	10.7536	7.21386	18.7609	0.785098
-130	-10.81	20.4041	7.73826	3.08542	11.0483	0.402226
-32.57	24.33	25.0813	9.04111	5.43684	14.9533	0.644275
-86.25	4.77	18.6234	7.61967	2.47956	10.2611	0.331011
-6.17	-2.81	15.3519	7.94226	1.97456	9.99844	0.257937
110	-11.5	27.0139	9.89274	6.45288	16.9698	0.733213
-21.01	13.8	22.7973	8.2398	4.19857	12.7739	0.522213
-84.52	2.08	25.4985	9.2145	5.66489	15.3843	0.665331
12	-18.99	21.2911	7.87946	3.46385	11.6052	0.444232
167.9	-25.05	18.1068	7.62607	2.34625	10.1187	0.314224
-30	55.25	14.086	8.22025	1.98641	10.2671	0.250918
71.64	0	30.3343	11.4385	7.57043	19.9664	0.789669
-30	50.84	15.6002	7.89621	1.98502	9.96758	0.260673
-132.46	-11.68	20.3033	7.72566	3.04543	10.9917	0.397697
-99.2	0.13	18.7683	7.62112	2.52048	10.308	0.33605
159.9	-18	28.1646	10.4371	6.96782	18.1327	0.770939
-33.61	14.43	26.0682	9.4617	5.97077	15.98	0.692692
-23.63	6.08	28.2282	10.4674	6.99318	18.1944	0.77256
0.6	-8.62	20.4918	7.7498	3.12075	11.0987	0.406211
-158	22.75	27.437	10.0914	6.6533	17.4056	0.748788
-74.46	37.66	20.2629	7.7208	3.02958	10.9694	0.395897
-45.5	-28.4	20.3899	7.73644	3.07976	11.0402	0.401586
-47.6	-30.8	19.3868	7.64355	2.71235	10.5428	0.359141
-30	50.84	15.5102	7.91255	1.98072	9.97789	0.259628
159.9	-18	27.2946	10.0243	6.58715	17.2598	0.74375
179.55	50	6.7839	9.91833	3.02826	12.9524	0.337908
-76.03	34.3	20.0283	7.69487	2.93961	10.8445	0.385619
-93	2.36	18.0624	7.62745	2.33572	10.1083	0.312869
-46.62	-33.39	18.9813	7.62586	2.58346	10.3826	0.34372
-28.95	43.88	22.8178	8.24568	4.20918	12.7915	0.523309
110	-11.5	27.0739	9.92075	6.48198	17.032	0.735529
-47.1	-27.7	21.0839	7.84164	3.37139	11.4658	0.434099
-90.71	3.17	17.8776	7.63461	2.29351	10.068	0.307384
-21.01	13.8	26.2373	9.5371	6.05975	16.1576	0.700436
-30	61.91	12.6583	8.59913	2.11481	10.7558	0.255722
110	-11.5	27.0139	9.89274	6.45288	16.9698	0.733213
-46.6	-27.9	20.4617	7.74578	3.10856	11.0812	0.404838
-179	58.9	5.01629	9.80819	2.97439	12.7853	0.339723
12	-18.99	10.8411	9.12073	2.40247	11.548	0.27696
-79.94	31.1	20.4988	7.75075	3.12359	11.1027	0.406531
-142.56	-8.91	26.6506	9.72464	6.2725	16.591	0.718492
14.32	-24.75	17.2795	7.67299	2.17463	9.97154	0.291347
-170.72	-18.17	27.0733	9.92047	6.4817	17.0314	0.735507
-158	22.75	25.997	9.4302	5.933	15.9053	0.689374
-62.85	41.1	20.1103	7.70349	2.97064	10.8873	0.389176
-30	59.35	12.6554	8.59995	2.11517	10.7569	0.255744
-51.58	42.05	20.5999	7.76476	3.16495	11.1622	0.411178
-19.87	29.18	23.6306	8.49974	4.64085	13.523	0.567178
-6.17	-2.81	13.6719	8.32444	2.01223	10.3912	0.251013
14.32	-24.75	14.7095	8.07491	1.96736	10.1125	0.252955
-19.17	44.46	22.0102	8.0331	3.802	12.1305	0.480655
-25	-2.24	25.7462	9.32063	5.7989	15.6427	0.677452
0.61	-8.63	15.1818	7.97556	1.96989	10.0239	0.256325
-131.17	-11.22	20.1655	7.70957	2.9918	10.9167	0.391594
-13.2	-1.37	21.6902	7.96047	3.64834	11.8889	0.464222
-47.3	-27.2	21.0177	7.83018	3.34235	11.4225	0.430901
69.98	14.6	29.4052	11.0221	7.38624	19.2617	0.791748
-138.07	-13.65	20.1646	7.70947	2.99143	10.9162	0.391552
-13.2	-1.37	22.0802	8.04986	3.83621	12.1849	0.484287
164.59	-19.22	29.0011	10.8337	7.26903	18.9135	0.787639
4.69	-31.03	15.4505	7.92361	1.97819	9.98527	0.258969
-22.94	7.58	28.0742	10.394	6.9311	18.0443	0.768539
-110.45	-3.88	19.2471	7.63617	2.66662	10.4849	0.353707
-95.07	1.61	17.4685	7.65839	2.20925	9.99645	0.296128
-6.17	-2.81	21.1619	7.85554	3.40593	11.5177	0.437894
-84.59	-2.01	21.6502	7.95188	3.62952	11.8597	0.462196
-12.85	-2.14	20.5568	7.7587	3.14723	11.1367	0.409189
-158	22.75	26.757	9.77356	6.326	16.7022	0.722919
-13.14	-2.12	17.9887	7.63004	2.31856	10.0916	0.31065
-30	59.35	12.6554	8.59995	2.11517	10.7569	0.255744
16.45	-29.52	14.8751	8.03897	1.96653	10.0786	0.253954
-30	53.56	13.7426	8.30627	2.00712	10.3689	0.250918
-90.35	3.31	18.7557	7.62094	2.51686	10.3038	0.335605
-73.23	40.48	19.7764	7.67129	2.84703	10.719	0.374928
-15.45	29.18	21.7558	7.97481	3.67944	11.9374	0.467564
-14.06	46.49	13.3091	8.41996	2.04287	10.5125	0.251997
-158	22.75	26.117	9.48335	5.99651	16.0312	0.694944
-20	16.38	16.3542	7.77606	2.04414	9.92218	0.271811
0.61	-8.63	20.1218	7.70474	2.97503	10.8934	0.389678
-53.3	-39.35	19.0593	7.62838	2.60732	10.4115	0.346601
0.6	-8.62	16.2818	7.78626	2.03664	9.92329	0.270554
-32.57	24.33	25.0413	9.02485	5.41486	14.9123	0.642219
38.24	21.98	30.8793	11.6669	7.61419	20.3039	0.779945
-33.61	14.43	26.4582	9.63678	6.17434	16.3894	0.710246
110	-20	25.8701	9.37451	5.86538	15.7724	0.68339
-132.65	-11.75	20.2733	7.72204	3.03364	10.9752	0.396359
-32.57	24.33	25.2113	9.0944	5.50816	15.087	0.650916
-47.1	-30.6	20.1868	7.71197	3.00002	10.9281	0.392531
-54.4	-43.48	14.861	8.04198	1.96653	10.0813	0.253861
-77.35	33.45	20.0486	7.69696	2.94724	10.855	0.386495
-12.72	-1.36	20.4183	7.74009	3.09111	11.0564	0.402868
-36.04	42.23	22.7633	8.23004	4.18091	12.7447	0.520388
-158	22.75	26.297	9.56388	6.09087	16.2202	0.703119
-123.07	-8.38	19.9149	7.68371	2.8974	10.7869	0.38076
-45.5	-26.2	20.9813	7.82401	3.3265	11.3989	0.429152
-29.76	-7.48	27.5178	10.1296	6.69027	17.488	0.751554
-33.61	14.43	26.4582	9.63678	6.17434	16.3894	0.710246
-14.06	46.49	13.2891	8.42533	2.04476	10.5195	0.252075
-45.7	-25.9	20.29	7.72404	3.04019	10.9844	0.397103
47.46	-11.64	27.4149	10.081	6.64315	17.3831	0.748022
110	-18.5	26.1223	9.48571	5.99931	16.0368	0.695188
-30	59.35	12.6654	8.59714	2.11392	10.753	0.255669
-30	53.56	13.7726	8.2986	2.00503	10.3595	0.250887
-102.35	17.68	18.7992	7.62161	2.52942	10.3184	0.337144
110	-21.5	24.8775	8.95898	5.32468	14.745	0.633736
-55.94	-47.62	9.18468	9.55517	2.70993	12.2795	0.304224
-29.02	17.87	26.8236	9.80434	6.35925	16.7717	0.725645
-74.91	35.08	20.2545	7.71981	3.02628	10.9648	0.395523
-127.03	-9.78	19.8461	7.67738	2.87224	10.7529	0.377852
-45.51	40.99	21.7184	7.96661	3.6617	11.9097	0.465659
-2.63	-5.86	16.2735	7.78744	2.03581	9.92346	0.270413
164.59	-19.22	28.5711	10.6305	7.12327	18.521	0.780342
-170.74	-18.18	26.9733	9.87383	6.43308	16.9276	0.731626
159.9	-18	27.7846	10.2562	6.80884	17.7573	0.760161
-69.88	40.55	20.8818	7.80758	3.28351	11.3353	0.424395
-45.85	-24.67	12.0233	8.78037	2.20316	11.0186	0.261539
-8.36	43.37	18.1048	7.62613	2.34576	10.1182	0.314161
-32.57	24.33	25.2013	9.09027	5.50268	15.0767	0.650407
-8.77	42.36	15.7361	7.87232	1.99261	9.95396	0.262365
-134.02	-12.23	20.2861	7.72358	3.03868	10.9822	0.396931
-158	22.75	26.667	9.73213	6.28075	16.6081	0.719178
-170.74	-18.18	25.6033	9.25915	5.72178	15.4935	0.670501
-158	22.75	26.747	9.76894	6.32099	16.6917	0.722507
110	-14	27.3655	10.0576	6.62026	17.3325	0.746285
177.33	28	24.7036	8.89038	5.22885	14.5689	0.624642
-22.87	32.68	20.6678	7.77457	3.19306	11.2029	0.414324
-20	16.38	18.9442	7.62481	2.57226	10.3691	0.342363
-106.8	-2.58	18.6788	7.62005	2.49501	10.2786	0.332919
-22.87	32.68	21.6978	7.96211	3.65193	11.8945	0.464608
-15.35	2.16	24.2782	8.72852	4.99449	14.1451	0.60207
-29.01	-5.14	27.1282	9.94613	6.50812	17.0882	0.737595
-158	22.75	26.007	9.43461	5.93831	15.9158	0.689842
-158	22.75	27.227	9.99245	6.55523	17.1901	0.741281
-45.7	-25.9	20.69	7.77785	3.20232	11.2163	0.415359
-25	-21.63	25.6589	9.28298	5.75184	15.5515	0.673218
-158	22.75	26.767	9.77817	6.331	16.7126	0.72333
176.38	-20.71	29.3499	10.9964	7.3714	19.2153	0.791352
-158	22.75	27.997	10.3572	6.89919	17.9684	0.766407
-21.01	13.8	26.3073	9.56855	6.09628	16.2311	0.703584
-2.63	-5.86	15.4435	7.92492	1.97791	9.98617	0.258893
-158	22.75	25.987	9.42579	5.92769	15.8948	0.688906
-45.46	-25.42	16.7459	7.72619	2.09149	9.92854	0.279291
-158	22.75	24.037	8.64073	4.86212	13.9098	0.589123
110	-38	13.3715	8.40328	2.03709	10.4909	0.25177
-22.8	43.99	21.8663	7.9996	3.73229	12.0203	0.473224
-20	39.9	15.8593	7.8515	2.00064	9.94364	0.264017
110	-14	27.3655	10.0576	6.62026	17.3325	0.746285
-20.02	41.49	15.483	7.91758	1.97953	9.9812	0.259324
-14.05	43.92	17.4269	7.66141	2.2014	9.99052	0.295053
-46.9	-31.1	18.6681	7.61996	2.49201	10.2752	0.332549
110	-38	13.4115	8.39264	2.0335	10.4771	0.251637
-36.46	19.05	26.3719	9.59767	6.12979	16.2988	0.706455
-158	22.75	26.377	9.59996	6.13241	16.3041	0.706679
-2.63	-5.86	12.6735	8.59484	2.11289	10.7497	0.255608
14.32	-24.75	15.2795	7.95626	1.97233	10.0089	0.257226
-158	22.75	24.617	8.85672	5.1811	14.4818	0.62008
110	-14	27.3555	10.0529	6.6156	17.3222	0.74593
110	-21.5	25.2975	9.13008	5.5553	15.1759	0.655278
-12.85	-2.14	15.1168	7.98864	1.96864	10.0346	0.255766
-158	22.75	24.237	8.71331	4.97184	14.1046	0.599864
-8.1	48.75	10.9544	9.08855	2.38198	11.4962	0.275275
-175.67	-19.99	28.1636	10.4366	6.96738	18.1317	0.770911
-87.43	4.35	18.6994	7.62025	2.50083	10.2853	0.333636
-30	59.35	12.6554	8.59995	2.11517	10.7569	0.255744
-17.43	41.08	14.6231	8.09414	1.96851	10.1315	0.252512
-82.75	6.02	18.4486	7.61982	2.43223	10.2085	0.325121
-104	-1.58	18.3372	7.62099	2.40324	10.1773	0.321478
-139.71	-14.15	20.294	7.72453	3.04176	10.9866	0.397281
110	-20	25.7901	9.33966	5.8225	15.6886	0.679566
-158	22.75	26.547	9.67719	6.21982	16.4824	0.714086
-158	22.75	27.127	9.94555	6.50753	17.0869	0.737548
-25.99	-28.79	19.089	7.62945	2.61656	10.4228	0.347712
-127.69	35.42	13.3895	8.39849	2.03547	10.4847	0.251709
110	-14	27.3555	10.0529	6.6156	17.3222	0.74593
-21.22	17.79	24.964	8.99362	5.37232	14.8332	0.638227
-35.52	-19.91	23.9311	8.60316	4.80426	13.8079	0.58342
-8.44	43.42	13.7361	8.30793	2.00758	10.3709	0.250926
110	-38	13.2815	8.42737	2.04549	10.5222	0.252105
-30	53.56	13.7626	8.30115	2.00572	10.3626	0.250897
-123.02	-8.35	19.9849	7.69049	2.92335	10.8223	0.38375
-27.2	44.02	22.5871	8.18078	4.09032	12.5956	0.510987
-46.01	-24.36	16.6004	7.74367	2.07255	9.92372	0.276377
176.38	-20.71	28.9899	10.8284	7.2655	18.9036	0.787486
174.27	-20.75	29.59	11.107	7.4328	19.4132	0.792668
-77.41	13.93	21.6289	7.94734	3.61948	11.8441	0.461115
-128.33	-10.23	20.1805	7.71126	2.99758	10.9247	0.392253
-94.43	1.83	18.7185	7.62046	2.50625	10.2915	0.334302
170.72	-29.54	18.5958	7.61955	2.47192	10.2524	0.330065
-21.01	13.8	25.6273	9.26943	5.73477	15.5186	0.671677
-28.95	43.17	22.4892	8.15421	4.04042	12.514	0.505783
-158	22.75	26.327	9.57739	6.10647	16.2517	0.704459
-158	22.75	27.287	10.0207	6.58354	17.2519	0.743472
179.55	50	6.5539	9.92628	3.03972	12.9713	0.339701
-158	22.75	24.047	8.64431	4.8676	13.9195	0.589661
-158	22.75	26.197	9.51902	6.03859	16.1152	0.698605
-158	22.75	25.257	9.11326	5.53314	15.1341	0.65323
-46.2	-28.1	20.5617	7.75938	3.14924	11.1395	0.409414
-141.96	-15.15	20.125	7.70509	2.97626	10.8951	0.389819
0.6	-8.62	16.3818	7.77227	2.04709	9.92194	0.272299
-30	53.56	13.7426	8.30627	2.00712	10.3689	0.250918
-158	22.75	28.387	10.543	7.05485	18.347	0.776369
-112.23	-4.51	19.4607	7.64799	2.73708	10.5745	0.362062
34.83	27.16	27.9718	10.3452	6.88867	17.9435	0.765696
-34.9	22.23	25.7412	9.31844	5.79618	15.6374	0.677208
-140.71	-14.63	20.217	7.71543	3.01169	10.9444	0.393862
-43.29	-30.14	17.8409	7.6363	2.28543	10.0606	0.306324
-109.55	-3.56	19.134	7.63119	2.63061	10.4401	0.3494
110	-15.5	26.6947	9.7449	6.29476	16.6371	0.72034
-36.46	19.05	26.4019	9.61124	6.14531	16.3303	0.707779
47.49	-11.8	27.5198	10.1305	6.69117	17.49	0.751621
-172.81	-19.5	28.4711	10.583	7.08654	18.427	0.778245
-114.23	-5.58	19.5527	7.65407	2.76841	10.6151	0.365748
110	-39.5	11.0747	9.05418	2.36045	11.4412	0.273526
47.42	-11.74	27.2149	9.98679	6.54952	17.1777	0.740837
-158	22.75	27.297	10.0254	6.58824	17.2622	0.743834
-158	22.75	26.687	9.74132	6.29084	16.629	0.720015
-158	22.75	26.897	9.83833	6.39557	16.8482	0.7286
-175.67	-19.99	27.4536	10.0992	6.66093	17.4225	0.749362
-10.8	46.78	20.8498	7.80244	3.26981	11.3151	0.422874
-25	-2.24	24.5062	8.81421	5.12006	14.371	0.61422
-8.44	43.42	14.7361	8.06906	1.9671	10.1069	0.253103
-33.93	43.48	23.2113	8.36387	4.41596	13.1381	0.544495
-158	22.75	25.317	9.1382	5.56596	15.1961	0.656261
110	-20	25.7401	9.31799	5.79562	15.6363	0.677158
-158	22.75	25.257	9.11326	5.53314	15.1341	0.65323
-13.98	48.06	14.4597	8.13133	1.97201	10.1695	0.251816
-47.1	-27.7	20.9839	7.82444	3.32762	11.4006	0.429275
-158	22.75	27.317	10.0348	6.59762	17.2827	0.744554
-35.83	18.04	26.0256	9.44286	5.94822	15.9354	0.690714
-47.1	-27.8	21.0827	7.84143	3.37086	11.465	0.434041
-32.38	43.6	23.1383	8.34124	4.37724	13.0727	0.540552
-91.32	2.96	18.0276	7.62863	2.32758	10.1003	0.311818
172.12	-21.37	29.0745	10.8681	7.29183	18.9784	0.788591
-35.8	21.41	25.7531	9.32359	5.80259	15.6499	0.677783
-25.63	1.9	13.0374	8.4937	2.07039	10.6104	0.253257
-75.99	34.33	20.2183	7.71558	3.0122	10.9451	0.39392
-21.93	10.06	28.2774	10.4908	7.01253	18.2419	0.773777
-158	22.75	26.617	9.7092	6.25544	16.5557	0.71707
-158	22.75	26.687	9.74132	6.29084	16.629	0.720015
-34.23	42.46	22.7517	8.22675	4.17493	12.7348	0.51977
-49.59	-35.71	15.0882	7.99444	1.96819	10.0394	0.25553
-65.43	40.64	20.4648	7.74619	3.10982	11.083	0.40498
37.22	23.36	29.452	11.0436	7.39845	19.3005	0.792039
-26.27	24.78	26.9263	9.85195	6.41001	16.8787	0.729768
-91.58	2.87	18.3738	7.62052	2.41264	10.1874	0.322663
110	-39.5	11.0747	9.05418	2.36045	11.4412	0.273526
110	-17	26.5231	9.66629	6.20761	16.4574	0.713058
-135.48	-12.75	20.1956	7.71298	3.00342	10.9328	0.392919
110	-17	26.5431	9.67541	6.21783	16.4783	0.713919
-21.93	10.06	27.9974	10.3574	6.89936	17.9688	0.766419
178.64	-20.97	29.0147	10.8401	7.27333	18.9257	0.787823
-102.94	6.33	27.1859	9.97316	6.5357	17.1478	0.739759
110	-21.5	25.3775	9.1635	5.599	15.2587	0.659301
-158	22.75	23.667	8.51199	4.66053	13.5571	0.569145
-158	22.75	25.597	9.25642	5.71832	15.4869	0.670188
-30	53.56	12.5626	8.62612	2.12705	10.7939	0.256468
172.12	-21.37	29.0745	10.8681	7.29183	18.9784	0.788591
-34.83	-31.16	14.3248	8.16283	1.9762	10.2031	0.251381
-10.56	46.9	20.5998	7.76475	3.1649	11.1621	0.411171
-158	22.75	25.317	9.1382	5.56596	15.1961	0.656261
-158	22.75	26.377	9.59996	6.13241	16.3041	0.706679
-158	22.75	23.447	8.439	4.54185	13.3525	0.557239
-158	22.75	26.817	9.80127	6.35594	16.7648	0.725375
-170.83	-18.25	26.3433	9.58477	6.11498	16.2688	0.705188
-158	22.75	26.617	9.7092	6.25544	16.5557	0.71707
-54.4	-43.48	14.891	8.03557	1.96655	10.0755	0.25406
-90.22	3.35	18.3957	7.62027	2.41833	10.1935	0.323378
110	-17	26.5531	9.67998	6.22294	16.4888	0.714348
-92.05	2.7	17.5761	7.6511	2.23017	10.0129	0.298968
162.12	-18.62	27.5104	10.1261	6.68688	17.4804	0.751302
-158	22.75	25.297	9.12987	5.55502	15.1754	0.655252
-25.63	1.9	13.9874	8.24456	1.99164	10.2952	0.250838
-158	22.75	26.617	9.7092	6.25544	16.5557	0.71707
-108.23	-3.08	18.9959	7.6263	2.58788	10.3879	0.344254
-30	49.44	17.5392	7.65352	2.2229	10.0071	0.297984
-158	22.75	27.577	10.1576	6.71701	17.548	0.753532
178.64	-20.97	29.0247	10.8448	7.27645	18.9345	0.787956
53.99	-16.96	27.0199	9.89555	6.45581	16.976	0.733447
-158	22.75	26.617	9.7092	6.25544	16.5557	0.71707
-30	50.84	15.6802	7.88203	1.98933	9.95928	0.261652
172.12	-21.37	29.2645	10.9568	7.34775	19.1429	0.790636
-158	22.75	27.247	10.0018	6.56469	17.2107	0.742015
-46.66	42.45	21.1858	7.85987	3.41655	11.5337	0.439058
-35.8	21.41	25.7531	9.32359	5.80259	15.6499	0.677783
-15.35	2.16	24.3182	8.74336	5.01649	14.1844	0.604208
-21.93	10.06	28.9274	10.799	7.24553	18.8478	0.786594
-158	22.75	24.017	8.63358	4.85117	13.8905	0.588046
-71.7	40.51	20.501	7.75104	3.12449	11.104	0.406632
-136.73	-13.07	20.222	7.71601	3.01365	10.9471	0.394085
14.32	-24.75	15.8495	7.85312	1.99997	9.94439	0.263882
-126.8	-9.7	19.9661	7.68864	2.91637	10.8127	0.382947
-54.73	-43.43	10.4161	9.23961	2.48092	11.7422	0.283577
110	-15.5	26.7147	9.7541	6.30482	16.658	0.721172
-158	22.75	27.227	9.99245	6.55523	17.1901	0.741281
-153.68	0	24.9731	8.99726	5.3773	14.8425	0.638695
47.42	-11.74	27.0149	9.89321	6.45337	16.9708	0.733251
-158	22.75	27.747	10.2383	6.79243	17.7195	0.758996
178.64	-20.97	28.7347	10.7081	7.18116	18.6729	0.783457
4.14	-11.62	19.6502	7.66115	2.80227	10.6596	0.369714
-158	22.75	26.947	9.86156	6.42016	16.9002	0.730587
-158	22.75	27.747	10.2383	6.79243	17.7195	0.758996
43.29	-15.34	27.1052	9.93536	6.49706	17.0644	0.736723
-21	21.95	23.9795	8.62027	4.8307	13.8544	0.58603
-158	22.75	26.087	9.47002	5.98068	15.9997	0.69356
-21.71	33.62	19.4013	7.64439	2.71718	10.5489	0.359712
-21.93	10.06	28.5774	10.6335	7.12555	18.527	0.78047
-178.51	-20.45	29.4179	11.0279	7.38958	19.2722	0.791831
-158	22.75	27.027	9.89882	6.45922	16.9833	0.733719
-25	-21.63	25.6589	9.28298	5.75184	15.5515	0.673218
-13.85	45.48	21.516	7.92379	3.56679	11.7626	0.455422
-25.72	30.29	21.6418	7.95009	3.62557	11.8535	0.461771
-32.57	24.33	25.1913	9.08615	5.4972	15.0664	0.649899
-158	22.75	26.637	9.71837	6.26558	16.5767	0.717915
-46.9	-28	21.2827	7.87787	3.46005	11.5995	0.443817
4.69	-31.03	15.4905	7.91618	1.97986	9.98027	0.259408
-35.83	18.04	26.3256	9.57679	6.10578	16.2503	0.7044
-134.05	-12.23	20.2661	7.72119	3.03084	10.9712	0.396041
-158	22.75	26.817	9.80127	6.35594	16.7648	0.725375
162.12	-18.62	28.0304	10.3731	6.91306	18.0013	0.767339
-24.61	43.75	21.9655	8.02255	3.78024	12.096	0.478339
-29	-16.61	26.836	9.8101	6.36543	16.7847	0.72615
-54.4	-43.48	14.911	8.03132	1.96659	10.0716	0.254196
-178.51	-20.45	29.5379	11.0831	7.42014	19.371	0.792472
110	-15.5	26.6847	9.7403	6.28972	16.6267	0.719922
-158	22.75	23.117	8.33469	4.36596	13.0536	0.539402
-132.38	-11.66	20.2033	7.71385	3.00638	10.937	0.393257
-172.81	-19.5	29.2611	10.9552	7.34678	19.14	0.790604
-98.03	0.55	18.9765	7.62572	2.582	10.3808	0.343543
-175.67	-19.99	29.0436	10.8536	7.2823	18.9511	0.788201
-34.9	22.23	25.8812	9.37933	5.87129	15.7839	0.683914
-158	22.75	26.227	9.53245	6.05431	16.1467	0.699966
110	-15.5	26.6847	9.7403	6.28972	16.6267	0.719922
-178.51	-20.45	29.5579	11.0923	7.42505	19.3872	0.792553
-8.89	42.17	15.0976	7.99253	1.96833	10.0378	0.255607
-54.91	40.82	20.9808	7.82391	3.32625	11.3985	0.429124
-109.2	-3.39	19.0465	7.62794	2.60338	10.4067	0.346125
47.51	-11.81	27.3198	10.0361	6.59894	17.2856	0.744656
110	-27.5	21.2444	7.87067	3.44278	11.5733	0.44193
162.12	-18.62	28.0004	10.3588	6.90061	17.9717	0.766503
-55.94	-47.62	8.77468	9.64589	2.78175	12.4401	0.311115
162.12	-18.62	28.0104	10.3636	6.90477	17.9816	0.766783
-158	22.75	26.037	9.44786	5.95422	15.9473	0.691241
-158	22.75	24.357	8.75784	5.03785	14.2228	0.60628
-158	22.75	24.547	8.82978	5.14251	14.4117	0.61638
-158	22.75	23.227	8.36875	4.42427	13.1522	0.545341
-13.98	48.06	14.4897	8.12442	1.97124	10.1623	0.25193
-21.26	30.91	20.01	7.69301	2.93274	10.8351	0.38483
-158	22.75	25.147	9.06792	5.47286	15.0207	0.647635
-158	22.75	26.307	9.56838	6.09607	16.2307	0.703566
-158	22.75	24.357	8.75784	5.03785	14.2228	0.60628
-26.47	-0.13	26.4559	9.63574	6.17317	16.387	0.710147
-117.83	-6.51	19.6227	7.65908	2.79265	10.6469	0.368589
-158	22.75	25.647	9.27784	5.74537	15.539	0.672635
-24.41	29.18	24.0292	8.63794	4.85785	13.9022	0.588703
-111.02	-4.08	19.3993	7.64427	2.71651	10.5481	0.359633
-158	22.75	26.657	9.72754	6.2757	16.5976	0.718758
-46.01	-24.36	12.4004	8.67219	2.14872	10.8599	0.257841
-17.43	41.08	24.6031	8.85139	5.17349	14.4679	0.619351
-35.83	18.04	26.3256	9.57679	6.10578	16.2503	0.7044
-31.46	-11.24	27.5033	10.1227	6.68366	17.4732	0.751062
-19.71	44.61	22.3962	8.12955	3.9934	12.4376	0.500861
162.12	-18.62	28.0404	10.3779	6.91719	18.0111	0.767615
-178.51	-20.45	28.3079	10.5053	7.02444	18.2713	0.774516
-94	2	17.4768	7.6578	2.21084	9.99766	0.296345
-21.56	22.17	24.2101	8.70346	4.95711	14.0783	0.598428
4.14	-11.62	12.0002	8.78703	2.20666	11.0286	0.261786
-36.46	19.05	26.4119	9.61577	6.15047	16.3408	0.708219
-158	22.75	25.107	9.05155	5.4509	14.9796	0.645589
-158	22.75	26.307	9.56838	6.09607	16.2307	0.703566
-35.2	-20.94	21.9541	8.01987	3.77469	12.0872	0.477748
-158	22.75	26.997	9.88483	6.44462	16.9522	0.732551
-175.67	-19.99	29.0236	10.8442	7.27608	18.9335	0.78794
-35.83	18.04	26.3256	9.57679	6.10578	16.2503	0.7044
-116.61	-6.08	19.6009	7.65748	2.78506	10.6369	0.3677
110	-26	23.0266	8.30724	4.31831	12.9735	0.53453
110	-23	24.7729	8.91757	5.26707	14.639	0.628279
110	-15.5	26.7147	9.7541	6.30482	16.658	0.721172
-8.77	42.36	15.3061	7.95109	1.9731	10.005	0.257482
-21.71	33.62	22.0513	8.04291	3.82208	12.1624	0.482788
-25	-24.88	22.3648	8.12135	3.97759	12.4119	0.499203
-8.44	43.42	17.6361	7.64734	2.24224	10.0228	0.300591
-26.47	-0.13	26.1759	9.50963	6.02755	16.0931	0.697646
-158	22.75	26.597	9.70004	6.24529	16.5348	0.716221
110	-26	22.5266	8.16429	4.05943	12.545	0.507768
-158	22.75	26.087	9.47002	5.98068	15.9997	0.69356
-158	22.75	24.327	8.74664	5.02134	14.1931	0.604678
-45	-28.7	20.1899	7.71232	3.0012	10.9298	0.392666
-29	-9.09	27.4752	10.1095	6.67086	17.4446	0.750106
-19.56	44.63	22.0762	8.0489	3.83426	12.1818	0.48408
-158	22.75	27.267	10.0112	6.57413	17.2313	0.742746
-158	22.75	24.857	8.95082	5.31338	14.7242	0.632668
-158	22.75	24.487	8.80687	5.10945	14.3518	0.613199
-125.75	-9.32	19.9248	7.68465	2.90108	10.7919	0.381184
-35.8	21.41	25.7531	9.32359	5.80259	15.6499	0.677783
173.26	-33.44	17.8813	7.63445	2.29433	10.0687	0.307491
110	-27.5	21.1244	7.84879	3.38925	11.4926	0.436063
-153.68	0	24.9631	8.99324	5.3718	14.8323	0.638178
-8.1	48.75	10.9644	9.0857	2.38018	11.4916	0.275128
110	-11.5	26.5739	9.6895	6.23357	16.5107	0.71524
-172.81	-19.5	26.6311	9.71567	6.26261	16.5705	0.717668
-8.92	42.26	15.4261	7.92819	1.97723	9.98842	0.258707
-57.27	41.56	20.5063	7.75176	3.12664	11.1071	0.406874
-32.57	24.33	25.2013	9.09027	5.50268	15.0767	0.650407
-24.99	-20.49	25.6026	9.25884	5.72139	15.4928	0.670466
-158	22.75	25.207	9.09259	5.50576	15.0825	0.650693
-158	22.75	26.857	9.81978	6.3758	16.8065	0.726995
-158	22.75	24.257	8.72068	4.98284	14.1242	0.600935
-8.77	42.36	15.6861	7.881	1.98966	9.9587	0.261726
-158	22.75	25.997	9.4302	5.933	15.9053	0.689374
-158	22.75	23.447	8.439	4.54185	13.3525	0.557239
-158	22.75	25.417	9.18008	5.62053	15.2997	0.661277
-158	22.75	26.967	9.87086	6.42996	16.921	0.731376
-49.82	-35.65	18.1023	7.6262	2.34518	10.1176	0.314086
-8.5	43.45	14.8561	8.04302	1.96653	10.0823	0.25383
-21.71	33.62	21.9613	8.02157	3.77822	12.0928	0.478124
4.14	-11.62	12.9202	8.526	2.08339	10.6542	0.253933
-8.1	48.75	10.9544	9.08855	2.38198	11.4962	0.275275
-20	47.01	16.5842	7.7457	2.07054	9.92337	0.276062
-92.68	2.46	17.5897	7.65022	2.2329	10.0151	0.299335
-158	22.75	23.887	8.58765	4.78014	13.7655	0.581036
-158	22.75	26.897	9.83833	6.39557	16.8482	0.7286
-21.22	17.79	25.344	9.14949	5.58074	15.2241	0.657622
-37.26	35.91	19.642	7.66053	2.79939	10.6558	0.369378
165	-19.5	28.0912	10.4021	6.93805	18.061	0.768998
176.38	-20.71	28.5599	10.6252	7.1192	18.5106	0.780115
-158	22.75	24.277	8.72807	4.99383	14.1439	0.602006
-12.77	3.07	19.4932	7.65008	2.7481	10.5888	0.36336
-46.12	-32.8	17.557	7.65234	2.22639	10.0099	0.298457
-21.06	11.74	27.8285	10.2771	6.82782	17.8012	0.761498
-158	22.75	25.387	9.16747	5.60418	15.2686	0.659777
-158	22.75	23.337	8.40353	4.48291	13.2518	0.551287
-8.77	42.36	15.0961	7.99284	1.96831	10.0381	0.255594
-55.6	-47.59	6.4102	9.92821	3.04448	12.9777	0.340624
47.49	-11.8	27.4198	10.0833	6.6454	17.388	0.748192
-158	22.75	26.047	9.45229	5.95952	15.9578	0.691706
-20	47.01	15.1342	7.98511	1.96895	10.0317	0.255913
165	-19.5	28.0812	10.3973	6.93396	18.0512	0.768728
-25	-13.93	22.9565	8.28628	4.28153	12.912	0.530758
-158	22.75	26.637	9.71837	6.26558	16.5767	0.717915
-158	22.75	23.867	8.58066	4.76924	13.7464	0.579956
-158	22.75	26.607	9.70462	6.25037	16.5453	0.716646
-26.47	-0.13	26.4559	9.63574	6.17317	16.387	0.710147
-158	22.75	28.257	10.4811	7.00452	18.2222	0.773275
-2.63	-5.86	15.3935	7.93434	1.97601	9.99274	0.258364
-158	22.75	24.857	8.95082	5.31338	14.7242	0.632668
-158	22.75	25.787	9.33829	5.82081	15.6853	0.679414
-25.72	30.29	22.8318	8.24974	4.21648	12.8036	0.524063
-158	22.75	23.867	8.58066	4.76924	13.7464	0.579956
110	-30.5	19.861	7.67872	2.87767	10.7602	0.37848
-53.86	41.85	20.7477	7.78653	3.22652	11.2516	0.41806
4.14	-11.62	18.0202	7.62889	2.32585	10.0986	0.311595
-158	22.75	26.037	9.44786	5.95422	15.9473	0.691241
-158	22.75	26.697	9.74592	6.29588	16.6395	0.720432
110	-30.5	19.851	7.67782	2.87403	10.7553	0.378059
-158	22.75	24.007	8.63002	4.8457	13.8808	0.587508
-158	22.75	26.667	9.73213	6.28075	16.6081	0.719178
-49.82	-35.65	18.4523	7.6198	2.43321	10.2096	0.325244
-54.4	-43.48	15.021	8.00827	1.96733	10.0512	0.254997
17.71	42.21	19.2607	7.63683	2.67101	10.4904	0.35423
-158	22.75	24.107	8.6659	4.90048	13.9777	0.592889
-30.16	26.46	23.6832	8.51748	4.66933	13.5723	0.570023
-158	22.75	26.657	9.72754	6.2757	16.5976	0.718758
110	-30.5	19.851	7.67782	2.87403	10.7553	0.378059
-78.03	32.93	20.1787	7.71105	2.99687	10.9237	0.392173
-60.98	41.27	20.1962	7.71304	3.00364	10.9332	0.392945
-158	22.75	26.177	9.51009	6.02809	16.0942	0.697693
-20.54	12.76	24.4883	8.8074	5.11021	14.3532	0.613272
-24.8	3.4	28.7228	10.7024	7.17704	18.6619	0.783244
-26.21	24.89	27.0363	9.90317	6.46375	16.993	0.73408
-59.22	41.42	20.5072	7.75189	3.12701	11.1076	0.406916
-175.67	-19.99	26.8536	9.81821	6.37411	16.803	0.726857
-69.02	40.58	19.9883	7.69083	2.92464	10.824	0.383899
-3.19	-20.44	18.2312	7.62289	2.37653	10.1494	0.318094
-95.99	-12.99	25.1883	9.08492	5.49555	15.0633	0.649745
-37.05	35.75	19.722	7.66678	2.8276	10.6931	0.372669
165	-19.5	27.9512	10.3354	6.88002	17.9231	0.765107
-158	22.75	24.217	8.70596	4.96085	14.085	0.598793
174.27	-20.75	29.24	10.9454	7.34079	19.122	0.790407
-158	22.75	25.217	9.09671	5.51124	15.0928	0.651201
110	-27.5	21.0144	7.8296	3.34088	11.4203	0.430739
-8.77	42.36	15.7561	7.86889	1.99384	9.95215	0.262625
-158	22.75	24.217	8.70596	4.96085	14.085	0.598793
-47.69	40.95	21.4427	7.90897	3.53295	11.7106	0.451754
-34.9	22.23	25.8612	9.37059	5.86059	15.763	0.682963
-158	22.75	26.507	9.65895	6.19936	16.4405	0.712363
-158	22.75	24.017	8.63358	4.85117	13.8905	0.588046
-45.28	-25.77	23.2259	8.36843	4.42373	13.1512	0.545285
-158	22.75	25.807	9.34698	5.83155	15.7062	0.680374
172.12	-21.37	25.6145	9.26393	5.72782	15.5052	0.671048
-47.5	-27.6	21.1839	7.85953	3.41571	11.5324	0.438967
-158	22.75	23.897	8.59115	4.7856	13.7751	0.581576
-22.87	32.68	22.4078	8.13259	3.99923	12.447	0.501473
-78.15	32.91	20.8087	7.79595	3.25231	11.2894	0.420931
-8.77	42.36	15.2261	7.96675	1.97091	10.017	0.256725
-158	22.75	27.537	10.1387	6.69895	17.5074	0.752198
-16.08	5.86	17.2054	7.67934	2.16178	9.96316	0.289544
-21.22	17.79	25.344	9.14949	5.58074	15.2241	0.657622
-158	22.75	26.447	9.63167	6.16855	16.3776	0.709755
-20	47.01	15.1442	7.98309	1.96913	10.03	0.255998
110	-14	27.3655	10.0576	6.62026	17.3325	0.746285
-29.12	-20.32	27.0721	9.91988	6.48109	17.0301	0.735458
-75.3	17.75	20.4356	7.74235	3.09807	11.0663	0.403655
165	-19.5	27.9912	10.3545	6.89677	17.9626	0.766244
-158	22.75	27.537	10.1387	6.69895	17.5074	0.752198
-14.05	43.92	19.4769	7.64903	2.74257	10.5816	0.362709
-25	-13.93	22.9565	8.28628	4.28153	12.912	0.530758
-34.83	-31.16	20.1948	7.71288	3.00311	10.9324	0.392884
-158	22.75	26.197	9.51902	6.03859	16.1152	0.698605
-158	22.75	26.677	9.73673	6.2858	16.6185	0.719597
-34.84	-31.37	18.5248	7.6195	2.45258	10.2309	0.327662
-158	22.75	24.907	8.97075	5.34092	14.7751	0.635269
-8.77	42.36	15.8961	7.84543	2.00326	9.94094	0.264534
-144.5	-16.25	19.5438	7.65345	2.76535	10.6112	0.365389
-20	39.9	16.4393	7.76448	2.05344	9.92178	0.273336
-115.13	-5.55	19.8108	7.67426	2.85944	10.7357	0.376369
-158	22.75	26.667	9.73213	6.28075	16.6081	0.719178
-158	22.75	24.297	8.73548	5.00483	14.1636	0.603075
-158	22.75	24.287	8.73178	4.99933	14.1537	0.602541
-158	22.75	24.307	8.7392	5.01033	14.1734	0.60361
-25	-13.93	22.9665	8.28925	4.28677	12.9207	0.531295
-158	22.75	25.447	9.19272	5.63687	15.3308	0.662773
0.6	-8.62	20.3818	7.73541	3.07652	11.0357	0.40122
-114.88	-5.46	19.3208	7.63989	2.69059	10.5151	0.35656
164.59	-19.22	28.4511	10.5734	7.07905	18.408	0.777808
-29.94	65.88	2.59045	8.81334	2.13659	10.9511	0.274416
172.53	-32.32	18.08	7.62689	2.33986	10.1123	0.313402
-158	22.75	26.837	9.81052	6.36588	16.7857	0.726187
-158	22.75	27.577	10.1576	6.71701	17.548	0.753532
-158	22.75	24.437	8.78792	5.0819	14.302	0.610542
-158	22.75	26.287	9.55938	6.08565	16.2097	0.70267
-24.8	3.4	28.0928	10.4029	6.93874	18.0626	0.769043
-158	22.75	24.017	8.63358	4.85117	13.8905	0.588046
-158	22.75	24.737	8.90344	5.24726	14.6026	0.626395
-109.35	-3.48	18.594	7.61955	2.47142	10.2519	0.330004
-158	22.75	25.647	9.27784	5.74537	15.539	0.672635
-177.58	-33	17.7471	7.64102	2.26525	10.0425	0.303659
-158	22.75	25.907	9.39063	5.88507	15.811	0.685138
-158	22.75	26.027	9.44344	5.94892	15.9368	0.690775
-124.45	-8.86	19.9638	7.68841	2.91551	10.8116	0.382848
-21.22	17.79	25.344	9.14949	5.58074	15.2241	0.657622
-158	22.75	24.317	8.74292	5.01584	14.1833	0.604144
-158	22.75	27.947	10.3334	6.87825	17.919	0.764987
-158	22.75	23.857	8.57718	4.76378	13.7369	0.579416
176.75	-35.87	17.6399	7.64712	2.243	10.0235	0.300693
-158	22.75	26.407	9.61353	6.14792	16.3356	0.708002
-30	57.86	13.2452	8.43715	2.049	10.535	0.252254
-129.28	-10.6	20.1214	7.70471	2.9749	10.8932	0.389663
110	-26	22.0766	8.049	3.83445	12.1821	0.484101
174.27	-20.75	27.88	10.3015	6.84988	17.8525	0.763035
-158	22.75	26.407	9.61353	6.14792	16.3356	0.708002
-158	22.75	23.277	8.38447	4.45089	13.1973	0.548043
-178.32	-5	30.6991	11.593	7.60551	20.1994	0.783916
-143.3	-15.73	19.8527	7.67797	2.87462	10.7561	0.378128
-16.08	5.86	27.6654	10.1996	6.75652	17.6375	0.756416
-158	22.75	23.557	8.47515	4.60106	13.4543	0.563192
-158	22.75	25.467	9.20116	5.64776	15.3516	0.663768
-29	-13.05	27.0151	9.8933	6.45346	16.971	0.733259
-158	22.75	26.247	9.54141	6.06477	16.1677	0.70087
-158	22.75	22.587	8.18073	4.09022	12.5954	0.510978
-29.25	-24.44	24.3058	8.73875	5.00968	14.1722	0.603546
16.19	-28.93	23.1398	8.34171	4.37805	13.074	0.540635
-25	-24.88	22.3548	8.11875	3.97256	12.4038	0.498676
-33.31	-15.17	27.0853	9.92606	6.48747	17.0438	0.735965
-25	-13.93	25.7965	9.34243	5.82593	15.6953	0.679873
-158	22.75	25.677	9.29074	5.76158	15.5704	0.674096
-26.4	-0.19	26.2159	9.52751	6.04854	16.1351	0.699466
-158	22.75	26.367	9.59544	6.12723	16.2936	0.706236
-22.94	7.58	22.8942	8.26789	4.24894	12.8576	0.527407
-172.81	-19.5	29.6511	11.1349	7.44717	19.4621	0.792833
-75.91	16.66	20.4396	7.74287	3.09967	11.0686	0.403835
-34.9	22.23	25.8812	9.37933	5.87129	15.7839	0.683914
-158	22.75	22.917	8.27459	4.26084	12.8774	0.528632
-8.1	48.75	10.9344	9.09424	2.38558	11.5053	0.27557
110	-36.5	14.7308	8.07023	1.96715	10.108	0.253073
-158	22.75	26.847	9.81515	6.37084	16.7961	0.726591
110	-18.5	23.1023	8.33019	4.3582	13.0406	0.538609
-158	22.75	25.307	9.13403	5.56049	15.1857	0.655757
-76.56	15.48	20.6845	7.77703	3.20002	11.213	0.415102
-116.53	-6.05	19.6609	7.66196	2.806	10.6645	0.37015
-158	22.75	26.317	9.57288	6.10127	16.2412	0.704013
170	-22	27.6549	10.1946	6.75185	17.6268	0.756077
-158	22.75	23.587	8.48513	4.61726	13.4822	0.564816
110	-17	24.8431	8.9453	5.30573	14.7101	0.631944
-55	-43.58	11.5161	8.92702	2.28416	11.2415	0.267517
-130.95	-11.15	20.182	7.71143	2.99816	10.9255	0.392319
-54.73	-43.43	13.2561	8.43422	2.04794	10.5312	0.252209
-2.63	-5.86	21.6235	7.9462	3.61696	11.8402	0.460843
-158	22.75	24.337	8.75037	5.02684	14.203	0.605212
110	-36.5	14.7408	8.06803	1.96706	10.1059	0.253129
-158	22.75	26.837	9.81052	6.36588	16.7857	0.726187
-158	22.75	26.217	9.52797	6.04908	16.1362	0.699513
-158	22.75	25.237	9.10498	5.52219	15.1134	0.652216
-158	22.75	24.237	8.71331	4.97184	14.1046	0.599864
-158	22.75	25.377	9.16328	5.59872	15.2582	0.659276
-158	22.75	28.307	10.5049	7.02407	18.2704	0.774493
-158	22.75	26.657	9.72754	6.2757	16.5976	0.718758
-75.28	17.78	20.9656	7.82136	3.31967	11.3888	0.428397
-158	22.75	27.607	10.1718	6.73048	17.5784	0.75452
-16.85	43.69	15.5105	7.91251	1.98073	9.97786	0.259631
174.27	-20.75	29.73	11.1707	7.46496	19.5245	0.792943
-158	22.75	24.717	8.89561	5.23623	14.5824	0.625345
170	-22	28.4649	10.58	7.08422	18.4211	0.77811
-158	22.75	26.967	9.87086	6.42996	16.921	0.731376
-158	22.75	24.957	8.99079	5.36844	14.826	0.637862
-158	22.75	26.467	9.64075	6.17884	16.3986	0.710627
-158	22.75	24.447	8.7917	5.08741	14.312	0.611073
110	-36.5	14.7408	8.06803	1.96706	10.1059	0.253129
-158	22.75	25.447	9.19272	5.63687	15.3308	0.662773
-158	22.75	25.237	9.10498	5.52219	15.1134	0.652216
-31.4	-27.63	21.637	7.94906	3.6233	11.85	0.461526
-124.37	-8.83	20.0051	7.69251	2.93091	10.8326	0.38462
-158	22.75	25.847	9.3644	5.85299	15.7481	0.682287
-158	22.75	27.007	9.88949	6.44949	16.9626	0.732942
-158	22.75	24.397	8.77284	5.05987	14.2623	0.608412
-158	22.75	26.037	9.44786	5.95422	15.9473	0.691241
-46.12	-32.8	17.557	7.65234	2.22639	10.0099	0.298457
-179.26	-34.73	17.7665	7.64	2.26936	10.0461	0.304204
-158	22.75	25.757	9.32528	5.80468	15.6539	0.677971
-158	22.75	24.417	8.78037	5.07088	14.2822	0.609477
-158	22.75	26.027	9.44344	5.94892	15.9368	0.690775
-25.72	30.29	22.7918	8.23822	4.19572	12.7692	0.521919
-158	22.75	24.387	8.76908	5.05436	14.2524	0.607879
178.64	-20.97	27.5647	10.1518	6.71151	17.5356	0.753127
-119.39	-7.07	19.6165	7.65863	2.79049	10.6441	0.368337
168	-20	27.7291	10.2298	6.7846	17.7016	0.758437
-158	22.75	26.837	9.81052	6.36588	16.7857	0.726187
-178.32	-5	30.7491	11.6137	7.60851	20.2291	0.782891
-52.68	41.95	20.6347	7.76975	3.17933	11.183	0.412788
-77.22	14.33	20.5996	7.76472	3.16482	11.162	0.411163
-158	22.75	24.537	8.82595	5.137	14.4017	0.61585
-158	22.75	25.187	9.08435	5.4948	15.0619	0.649675
110	-29	19.7779	7.67142	2.84756	10.7198	0.37499
-21.61	44.46	22.2594	8.09427	3.92483	12.3268	0.493655
-158	22.75	28.167	10.4382	6.96875	18.135	0.770999
-30	34.07	20.4123	7.73932	3.08873	11.053	0.4026
-133.41	-12.02	20.2374	7.7178	3.01962	10.9555	0.394765
-158	22.75	26.407	9.61353	6.14792	16.3356	0.708002
-158	22.75	25.847	9.3644	5.85299	15.7481	0.682287
-158	22.75	26.657	9.72754	6.2757	16.5976	0.718758
-158	22.75	24.137	8.67676	4.91693	14.0068	0.594501
-108.12	-3.05	18.4959	7.61957	2.44479	10.2223	0.326691
-158	22.75	24.487	8.80687	5.10945	14.3518	0.613199
176.38	-20.71	26.4399	9.62845	6.1649	16.3701	0.709445
-108.86	-3.32	19.1265	7.63089	2.62825	10.4372	0.349117
18.01	-33.62	16.7418	7.72666	2.09093	9.92837	0.279207
-158	22.75	28.337	10.5192	7.03568	18.2992	0.775207
-25	-13.93	25.7865	9.33809	5.82056	15.6848	0.679393
-158	22.75	25.827	9.35568	5.84227	15.7272	0.681332
-158	22.75	23.117	8.33469	4.36596	13.0536	0.539402
-80.04	9.85	27.9445	10.3323	6.87723	17.9166	0.764917
-158	22.75	24.527	8.82213	5.13149	14.3917	0.61532
-16.89	43.79	15.5405	7.90702	1.9821	9.97431	0.259973
-158	22.75	27.077	9.92217	6.48345	17.0352	0.735646
-158	22.75	26.987	9.88018	6.43974	16.9418	0.73216
-158	22.75	24.357	8.75784	5.03785	14.2228	0.60628
-158	22.75	23.797	8.55638	4.73111	13.6798	0.576175
-76.78	33.83	20.8662	7.80507	3.27685	11.3254	0.423656
-158	22.75	25.127	9.05973	5.46188	15.0001	0.646613
-141.22	-14.85	20.1576	7.70869	2.98875	10.9124	0.391246
170	-22	27.0949	9.93054	6.49209	17.0537	0.73633
-79.07	10.95	20.217	7.71543	3.01171	10.9444	0.393864
-55	-43.58	11.5061	8.92992	2.28584	11.246	0.267645
-30	49.44	16.9292	7.70596	2.1176	9.93879	0.28319
178.64	-20.97	28.2847	10.4943	7.01542	18.249	0.773956
-158	22.75	26.847	9.81515	6.37084	16.7961	0.726591
-158	22.75	26.467	9.64075	6.17884	16.3986	0.710627
-8.77	42.36	15.1761	7.97669	1.96977	10.0249	0.256276
-158	22.75	26.637	9.71837	6.26558	16.5767	0.717915
-129.4	-23.28	23.3919	8.42115	4.51231	13.302	0.554259
-74.91	35.83	20.8809	7.80743	3.28312	11.3347	0.424351
-25.99	-28.79	19.029	7.62735	2.59802	10.4002	0.345479
-158	22.75	26.237	9.53693	6.05955	16.1572	0.700419
-15.41	44.96	21.6986	7.9623	3.65233	11.8951	0.464652
-158	22.75	25.057	9.03119	5.42344	14.9283	0.643022
-158	22.75	25.117	9.05564	5.45639	14.9899	0.646101
-78.7	32.56	20.8288	7.7991	3.26085	11.3019	0.421879
-9.7	48.45	26.8777	9.82941	6.38607	16.8281	0.72783
-24.8	3.4	28.8328	10.7544	7.21446	18.7625	0.785127
-22.94	7.58	21.6242	7.94633	3.61726	11.8406	0.460875
-158	22.75	26.007	9.43461	5.93831	15.9158	0.689842
-113.71	-5.05	19.2375	7.63571	2.66351	10.481	0.353337
-149.98	-17.75	18.8237	7.62205	2.53654	10.3267	0.338015
-39.63	43.02	23.1657	8.34971	4.39178	13.0972	0.542034
-8.79	42.23	15.5261	7.90964	1.98144	9.97599	0.259809
-158	22.75	26.857	9.81978	6.3758	16.8065	0.726995
-80.03	31.2	20.4688	7.74672	3.11144	11.0853	0.405163
-158	22.75	24.197	8.69863	4.94987	14.0654	0.597721
-24.99	-16.59	25.3673	9.15922	5.59344	15.2482	0.65879
178.21	-26.99	23.3721	8.4148	4.50173	13.2839	0.553191
-105.81	-2.58	18.1804	7.62406	2.36402	10.1366	0.3165
-158	22.75	24.717	8.89561	5.23623	14.5824	0.625345
-158	22.75	25.997	9.4302	5.933	15.9053	0.689374
-117.63	-6.44	19.7227	7.66684	2.82785	10.6935	0.372698
168	-20	28.0791	10.3963	6.93311	18.0491	0.768672
-158	22.75	26.277	9.55488	6.08044	16.1992	0.702221
-144.4	-16.2	19.5338	7.65277	2.76192	10.6067	0.364986
-25	-13.93	22.9665	8.28925	4.28677	12.9207	0.531295
-158	22.75	27.097	9.93152	6.4931	17.0559	0.73641
-34.84	-31.37	20.0748	7.69971	2.95717	10.8687	0.387633
-29.94	65.88	4.21045	9.60356	2.81442	12.42	0.328748
-30.16	26.46	24.1532	8.68266	4.92583	14.0227	0.595372
-158	22.75	24.127	8.67314	4.91145	13.9971	0.593963
-158	22.75	25.997	9.4302	5.933	15.9053	0.689374
-100.63	-16.96	22.6998	8.21207	4.14814	12.6906	0.516995
-158	22.75	24.167	8.68767	4.9334	14.0361	0.596111
-158	22.75	25.847	9.3644	5.85299	15.7481	0.682287
172.12	-21.37	25.6145	9.26393	5.72782	15.5052	0.671048
-158	22.75	25.587	9.25215	5.71291	15.4765	0.669697
-74.91	35.1	19.9445	7.68653	2.90833	10.8018	0.382021
-158	22.75	26.027	9.44344	5.94892	15.9368	0.690775
-158	22.75	23.877	8.58415	4.77469	13.756	0.580496
-158	22.75	24.557	8.83362	5.14803	14.4217	0.616909
-12.77	3.07	25.1832	9.08281	5.49275	15.058	0.649485
-158	22.75	25.927	9.3994	5.89574	15.8319	0.686084
-45.15	-26.03	22.9013	8.27	4.25268	12.8638	0.527793
-176.33	-32.37	17.6674	7.64548	2.24863	10.0282	0.301446
-29.3	27.21	24.4078	8.7769	5.06582	14.2731	0.608988
-140.28	-8.91	26.5205	9.66514	6.20632	16.4547	0.712949
-158	22.75	25.447	9.19272	5.63687	15.3308	0.662773
-46.12	-32.8	17.557	7.65234	2.22639	10.0099	0.298457
-158	22.75	25.817	9.35133	5.83691	15.7167	0.680853
-26.32	44.02	22.2671	8.09624	3.9287	12.333	0.494063
-8.44	43.42	15.4361	7.92631	1.97762	9.98712	0.258814
-158	22.75	24.137	8.67676	4.91693	14.0068	0.594501
-158	22.75	25.227	9.10085	5.51671	15.1031	0.651709
-30	57.86	13.2652	8.43176	2.04706	10.5279	0.252171
-53.3	-39.35	19.0593	7.62838	2.60732	10.4115	0.346601
-158	22.75	28.087	10.4001	6.93633	18.0569	0.768885
-20.54	12.76	29.9183	11.2556	7.5038	19.6692	0.792716
-158	22.75	24.137	8.67676	4.91693	14.0068	0.594501
-52.19	-37.81	15.7058	7.87757	1.9908	9.95679	0.261975
-158	22.75	24.597	8.849	5.17008	14.4617	0.619024
-158	22.75	25.447	9.19272	5.63687	15.3308	0.662773
-158	22.75	26.047	9.45229	5.95952	15.9578	0.691706
-21.88	26.28	23.5632	8.47721	4.60441	13.4601	0.563528
-158	22.75	26.247	9.54141	6.06477	16.1677	0.70087
-77.8	13.27	20.6469	7.77152	3.18439	11.1903	0.413355
-158	22.75	27.127	9.94555	6.50753	17.0869	0.737548
-158	22.75	24.117	8.66951	4.90596	13.9874	0.593426
-25	-13.93	25.7965	9.34243	5.82593	15.6953	0.679873
-158	22.75	25.877	9.3775	5.86904	15.7795	0.683715
168	-20	28.0691	10.3916	6.92901	18.0393	0.768401
-30.16	26.46	24.4932	8.80924	5.11288	14.358	0.613529
-16.08	5.86	16.9554	7.70323	2.12155	9.94065	0.283768
-158	22.75	24.907	8.97075	5.34092	14.7751	0.635269
-158	22.75	26.497	9.6544	6.19424	16.43	0.71193
-158	22.75	25.837	9.36004	5.84763	15.7376	0.681809
-158	22.75	24.527	8.82213	5.13149	14.3917	0.61532
-21.01	13.8	20.9073	7.81173	3.29449	11.3515	0.425612
-55.6	-47.59	6.4602	9.92781	3.04304	12.9759	0.340321
-12.63	-4.47	22.5888	8.18122	4.09115	12.5969	0.511073
-36.6	24.87	28.5162	10.6044	7.10322	18.4695	0.779209
-158	22.75	25.747	9.32095	5.7993	15.6435	0.677488
-158	22.75	24.907	8.97075	5.34092	14.7751	0.635269
-33.31	-15.17	27.0753	9.92139	6.48265	17.0334	0.735582
-158	22.75	24.887	8.96276	5.32991	14.7547	0.63423
-158	22.75	26.297	9.56388	6.09087	16.2202	0.703119
-30	50.84	15.6402	7.88908	1.98712	9.96333	0.261157
-9.7	48.45	14.2177	8.18832	1.98034	10.2311	0.251125
-178.51	-20.45	26.8279	9.80633	6.36138	16.7762	0.72582
-158	22.75	24.197	8.69863	4.94987	14.0654	0.597721
-26.34	24.63	26.8363	9.81021	6.36554	16.785	0.726159
-158	22.75	27.187	9.97367	6.53622	17.1489	0.7398
-12.63	-4.47	22.1988	8.07902	3.8947	12.2784	0.490477
-158	22.75	27.657	10.1955	6.75277	17.6289	0.756144
-20	39.9	16.4493	7.76315	2.05457	9.9218	0.273519
-158	22.75	24.777	8.91916	5.2693	14.6431	0.628491
-43.65	41.19	22.1133	8.05793	3.8525	12.2109	0.486014
-46.01	-24.36	15.1404	7.98386	1.96906	10.0307	0.255966
-158	22.75	24.627	8.86059	5.18662	14.4918	0.620608
-28.21	-3.92	26.7735	9.78119	6.33428	16.7195	0.7236
39.56	-21.38	23.575	8.48115	4.6108	13.4711	0.564169
-8.36	43.37	18.5248	7.6195	2.45257	10.2309	0.327661
-158	22.75	23.467	8.44552	4.55259	13.371	0.558321
110	-24.5	22.3954	8.12934	3.99298	12.4369	0.500818
-158	22.75	26.777	9.78278	6.336	16.7231	0.723741
-158	22.75	26.687	9.74132	6.29084	16.629	0.720015
-158	22.75	26.247	9.54141	6.06477	16.1677	0.70087
-158	22.75	26.687	9.74132	6.29084	16.629	0.720015
-158	22.75	23.417	8.42925	4.52575	13.325	0.555615
-158	22.75	23.807	8.55983	4.73655	13.6893	0.576715
-77.8	13.23	21.2769	7.87677	3.45743	11.5955	0.443531
-158	22.75	24.147	8.68039	4.92242	14.0166	0.595038
-158	22.75	25.947	9.40818	5.9064	15.8529	0.687027
-158	22.75	26.567	9.68632	6.23002	16.5034	0.714942
-158	22.75	26.757	9.77356	6.326	16.7022	0.722919
-158	22.75	26.327	9.57739	6.10647	16.2517	0.704459
-158	22.75	26.327	9.57739	6.10647	16.2517	0.704459
-158	22.75	23.587	8.48513	4.61726	13.4822	0.564816
-158	22.75	25.217	9.09671	5.51124	15.0928	0.651201
-110.7	-3.98	19.1771	7.63298	2.64422	10.4569	0.351032
0.6	-8.62	18.4718	7.61968	2.43836	10.2152	0.325889
-158	22.75	24.437	8.78792	5.0819	14.302	0.610542
-158	22.75	26.527	9.66807	6.2096	16.4615	0.713226
-178.37	-33.42	17.6427	7.64695	2.24358	10.024	0.300771
-24.99	-16.59	25.3973	9.17181	5.6098	15.2793	0.660293
-20	24.51	16.636	7.73928	2.07704	9.92463	0.277075
-158	22.75	26.527	9.66807	6.2096	16.4615	0.713226
-158	22.75	25.117	9.05564	5.45639	14.9899	0.646101
-37.88	43.15	23.1121	8.3332	4.36339	13.0493	0.539139
164.59	-19.22	26.8711	9.82632	6.38277	16.8212	0.727562
170	-22	27.5949	10.1661	6.72506	17.5662	0.754123
-158	22.75	26.287	9.55938	6.08565	16.2097	0.70267
-21	21.95	26.0295	9.44458	5.95029	15.9395	0.690895
-30	57.86	13.2752	8.42907	2.0461	10.5244	0.25213
-158	22.75	26.327	9.57739	6.10647	16.2517	0.704459
16.45	-29.52	23.8751	8.58349	4.77366	13.7542	0.580394
170	-22	26.2249	9.53151	6.05322	16.1445	0.699872
-24.02	5.17	29.0234	10.8442	7.27604	18.9333	0.787938
-79.28	10.51	20.3865	7.73601	3.0784	11.0383	0.401433
-115.13	-5.58	19.5308	7.65257	2.76092	10.6054	0.364869
-17.51	36.61	29.6447	11.132	7.4457	19.4571	0.792819
-30	57.86	13.2152	8.44525	2.05195	10.5457	0.252383
-158	22.75	23.817	8.56329	4.742	13.6988	0.577256
-158	22.75	23.817	8.56329	4.742	13.6988	0.577256
-158	22.75	25.697	9.29935	5.77237	15.5912	0.675068
-158	22.75	26.567	9.68632	6.23002	16.5034	0.714942
-158	22.75	25.687	9.29504	5.76697	15.5808	0.674583
-158	22.75	25.837	9.36004	5.84763	15.7376	0.681809
-158	22.75	23.897	8.59115	4.7856	13.7751	0.581576
-158	22.75	25.617	9.26498	5.72915	15.5077	0.671168
-158	22.75	27.517	10.1292	6.68988	17.4871	0.751525
-158	22.75	26.527	9.66807	6.2096	16.4615	0.713226
-158	22.75	26.047	9.45229	5.95952	15.9578	0.691706
-158	22.75	26.987	9.88018	6.43974	16.9418	0.73216
-158	22.75	17.727	7.64211	2.261	10.0388	0.303096
-158	22.75	25.647	9.27784	5.74537	15.539	0.672635
-17.43	41.08	14.6231	8.09414	1.96851	10.1315	0.252512
110	-29	20.2279	7.71669	3.01592	10.9503	0.394344
-21.88	26.28	23.4632	8.44428	4.55055	13.3675	0.558115
-158	22.75	24.057	8.64789	4.87307	13.9291	0.5902
39.88	18.4	30.2718	11.4115	7.56217	19.9238	0.790359
-8.77	42.36	15.1761	7.97669	1.96977	10.0249	0.256276
-179.26	-34.73	19.0265	7.62727	2.59723	10.3992	0.345383
-12.77	3.07	21.3032	7.88176	3.46932	11.6135	0.444829
-83.93	5.6	18.562	7.61949	2.46266	10.2421	0.328916
-158	22.75	24.227	8.70963	4.96635	14.0948	0.599329
-20	24.51	18.146	7.62495	2.35566	10.1281	0.315431
-158	22.75	24.747	8.90736	5.25277	14.6127	0.626919
-158	22.75	26.527	9.66807	6.2096	16.4615	0.713226
-20	39.9	16.4393	7.76448	2.05344	9.92178	0.273336
-9.7	48.45	26.8677	9.82477	6.38112	16.8177	0.727428
-158	22.75	23.217	8.36563	4.41896	13.1432	0.5448
-21.88	26.28	23.4632	8.44428	4.55055	13.3675	0.558115
164.65	-19.22	28.2111	10.4592	6.98637	18.1778	0.772128
-75.95	16.6	21.1096	7.84617	3.38271	11.4828	0.435345
-158	22.75	26.067	9.46115	5.97011	15.9787	0.692635
-158	22.75	23.577	8.4818	4.61186	13.4729	0.564275
-19.49	9.71	29.2126	10.9327	7.33292	19.0985	0.790138
-158	22.75	24.017	8.63358	4.85117	13.8905	0.588046
165	-19.5	26.8012	9.79396	6.34807	16.7483	0.724731
-78.15	12.65	20.997	7.82666	3.33333	11.4091	0.429906
-158	22.75	23.507	8.45863	4.57411	13.4079	0.560486
-158	22.75	26.257	9.5459	6.07	16.1782	0.701321
-158	22.75	27.227	9.99245	6.55523	17.1901	0.741281
-158	22.75	24.747	8.90736	5.25277	14.6127	0.626919
178.32	22	25.5526	9.23749	5.69427	15.4407	0.668006
168	-20	27.7291	10.2298	6.7846	17.7016	0.758437
-12.63	-4.47	21.7388	7.97106	3.67135	11.9248	0.466696
179	16	27.3721	10.0608	6.62334	17.3393	0.74652
-158	22.75	26.187	9.51455	6.03334	16.1047	0.698149
-21.88	26.28	23.4532	8.44102	4.54518	13.3582	0.557574
-158	22.75	24.877	8.95877	5.3244	14.7445	0.63371
-158	22.75	25.647	9.27784	5.74537	15.539	0.672635
-158	22.75	26.817	9.80127	6.35594	16.7648	0.725375
-24.99	-16.59	25.3973	9.17181	5.6098	15.2793	0.660293
-75.3	17.75	20.4456	7.74366	3.10209	11.072	0.404109
-123.46	-8.67	19.8766	7.68014	2.88335	10.7679	0.379137
-158	22.75	24.437	8.78792	5.0819	14.302	0.610542
-158	22.75	24.207	8.70229	4.95536	14.0752	0.598257
-172.81	-19.5	29.7111	11.1622	7.46078	19.5096	0.792927
178.32	22	25.3526	9.15307	5.58541	15.2329	0.658052
-158	22.75	24.777	8.91916	5.2693	14.6431	0.628491
-173.63	-30.57	17.9234	7.63263	2.30374	10.0775	0.308721
-158	22.75	24.967	8.99481	5.37395	14.8362	0.63838
-21.3	44.5	22.0687	8.0471	3.83059	12.1759	0.483692
-55.6	-47.59	6.4602	9.92781	3.04304	12.9759	0.340321
-29.75	43.7	22.594	8.18267	4.09384	12.6013	0.511353
-158	22.75	24.547	8.82978	5.14251	14.4117	0.61638
-158	22.75	24.557	8.83362	5.14803	14.4217	0.616909
-79.53	30.56	20.1161	7.70412	2.97286	10.8904	0.38943
-158	22.75	24.957	8.99079	5.36844	14.826	0.637862
-25.78	1.29	26.4792	9.64632	6.18513	16.4114	0.71116
-158	22.75	26.147	9.4967	6.01232	16.0627	0.696322
-21.47	21.76	22.6495	8.19801	4.12229	12.648	0.514312
-158	22.75	23.997	8.62646	4.84023	13.8712	0.586969
110	-29	20.2279	7.71669	3.01592	10.9503	0.394344
-18.21	47.37	17.535	7.65379	2.22209	10.0064	0.297875
-30	36.78	21.1132	7.8468	3.3843	11.4852	0.435519
-8.36	43.37	15.1148	7.98904	1.96861	10.0349	0.255749
-22.28	9.05	29.7265	11.1692	7.46419	19.5217	0.79294
-159	31.52	27.4233	10.0849	6.64702	17.3916	0.748314
164.65	-19.22	28.2811	10.4925	7.01397	18.2455	0.773866
-56.55	40.8	20.7576	7.78804	3.2307	11.2577	0.418525
-158	22.75	27.507	10.1245	6.68533	17.4769	0.751187
-22.94	7.58	28.1142	10.4131	6.94742	18.0835	0.769613
-158	22.75	24.147	8.68039	4.92242	14.0166	0.595038
-29.94	65.88	2.99045	9.061	2.35461	11.4169	0.29248
-158	22.75	27.227	9.99245	6.55523	17.1901	0.741281
-158	22.75	26.957	9.86621	6.42506	16.9106	0.730982
-158	22.75	24.427	8.78414	5.07639	14.2921	0.61001
-77.24	14.03	21.4289	7.90622	3.52661	11.7009	0.451066
-55.6	-47.59	6.4702	9.92769	3.04272	12.9755	0.340258
-20	47.01	15.1042	7.99119	1.96843	10.0367	0.255661
47.48	-11.6	28.2149	10.4611	6.98791	18.1816	0.772226
-139.6	25.77	20.4625	7.74589	3.10892	11.0817	0.404878
-116.35	-5.98	19.7669	7.67049	2.84363	10.7145	0.374533
-158	22.75	22.977	8.29237	4.29225	12.9299	0.531858
-29	25.65	24.8017	8.92892	5.28294	14.6681	0.629785
-52.28	41.98	22.1599	8.06937	3.87547	12.2476	0.488445
-17.43	41.08	29.9331	11.2622	7.50663	19.6803	0.792669
-158	22.75	25.707	9.30366	5.77776	15.6017	0.675553
-158	22.75	23.657	8.50861	4.65512	13.5477	0.568604
-158	22.75	25.417	9.18008	5.62053	15.2997	0.661277
-158	22.75	27.217	9.98775	6.55048	17.1798	0.740912
-158	22.75	26.967	9.87086	6.42996	16.921	0.731376
-158	22.75	25.637	9.27355	5.73997	15.5286	0.672146
-158	22.75	25.077	9.03932	5.43443	14.9488	0.64405
-6.17	-2.81	21.1519	7.85374	3.40148	11.511	0.437406
-158	22.75	24.517	8.81831	5.12598	14.3817	0.61479
-12.72	-1.36	18.2883	7.62178	2.3908	10.1642	0.319905
-26.33	24.67	26.8963	9.83802	6.39523	16.8475	0.728573
164.65	-19.22	28.2611	10.483	7.00613	18.2262	0.773376
-158	22.75	24.307	8.7392	5.01033	14.1734	0.60361
-20.54	12.76	21.0183	7.83029	3.34263	11.4229	0.430931
-158	22.75	25.427	9.18429	5.62598	15.3101	0.661776
-158	22.75	25.197	9.08847	5.50028	15.0722	0.650184
-124.64	-8.93	19.8838	7.68081	2.886	10.7715	0.379443
-158	22.75	25.907	9.39063	5.88507	15.811	0.685138
18.01	-33.62	11.1218	9.04067	2.3521	11.4198	0.272853
-158	22.75	23.597	8.48847	4.62266	13.4916	0.565357
-27.34	-2.02	26.1228	9.48592	5.99957	16.0373	0.69521
-20.01	39.87	18.2493	7.62251	2.38102	10.154	0.318664
-13.98	48.06	14.2197	8.18784	1.98026	10.2306	0.25113
-14.3	-7.23	23.0562	8.31619	4.33392	12.9997	0.536127
47.46	-11.64	28.0149	10.3658	6.90666	17.9861	0.76691
-158	22.75	24.147	8.68039	4.92242	14.0166	0.595038
-127.2	-9.83	20.1061	7.70305	2.96907	10.8851	0.388996
-158	22.75	25.367	9.15909	5.59326	15.2478	0.658774
-158	22.75	26.797	9.79202	6.34598	16.7439	0.72456
-158	22.75	24.127	8.67314	4.91145	13.9971	0.593963
-158	22.75	26.007	9.43461	5.93831	15.9158	0.689842
-158	22.75	27.107	9.93619	6.49791	17.0662	0.73679
-158	22.75	26.107	9.4789	5.99124	16.0207	0.694483
110	-29	20.2379	7.71785	3.01981	10.9558	0.394787
-158	22.75	24.607	8.85286	5.17559	14.4718	0.619552
-158	22.75	24.147	8.68039	4.92242	14.0166	0.595038
-158	22.75	26.027	9.44344	5.94892	15.9368	0.690775
-158	22.75	24.217	8.70596	4.96085	14.085	0.598793
-148.89	25.02	22.6406	8.19554	4.11772	12.6405	0.513837
-10.64	47.96	17.0543	7.69332	2.1369	9.9485	0.285997
-30	38.48	24.0077	8.63028	4.84611	13.8815	0.587548
-158	22.75	22.757	8.22825	4.17765	12.7393	0.520051
-13.2	-1.37	20.7302	7.78387	3.21915	11.2408	0.417238
-158	22.75	22.847	8.25412	4.22434	12.8167	0.524873
-158	22.75	25.967	9.41698	5.91705	15.8738	0.687968
66.42	-9.39	29.8078	11.2059	7.48164	19.585	0.792933
-49.82	-35.65	18.4523	7.6198	2.43321	10.2096	0.325244
-158	22.75	26.897	9.83833	6.39557	16.8482	0.7286
-148.89	25.02	22.6506	8.19832	4.12285	12.649	0.51437
-158	22.75	23.767	8.54605	4.7148	13.6514	0.574553
26.29	-35.19	20.57	7.76055	3.15267	11.1445	0.4098
-30	34.07	24.2023	8.7006	4.95282	14.0707	0.598009
-151.81	-18.81	18.8079	7.62177	2.53194	10.3213	0.337452
-158	22.75	21.857	7.99748	3.72781	12.0133	0.472745
-17.44	5.98	28.3521	10.5263	7.04149	18.3137	0.775562
17.4	39.84	18.8717	7.62303	2.55063	10.3433	0.339734
-26.3	24.7	26.9163	9.8473	6.40509	16.8683	0.729371
-158	22.75	24.687	8.88389	5.21969	14.5522	0.623768
-158	22.75	24.087	8.65868	4.88951	13.9582	0.591813
179.82	-30.1	21.87	8.00046	3.7341	12.0232	0.473417
-158	22.75	26.987	9.88018	6.43974	16.9418	0.73216
-36.59	24.94	28.4962	10.5949	7.09585	18.4507	0.778785
-158	22.75	24.877	8.95877	5.3244	14.7445	0.63371
-9.7	48.45	26.8777	9.82941	6.38607	16.8281	0.72783
-48.88	42.27	21.9703	8.02368	3.78259	12.0997	0.47859
-158	22.75	24.777	8.91916	5.2693	14.6431	0.628491
-17.05	32.43	25.903	9.38889	5.88296	15.8068	0.68495
-164.08	-25.8	18.9379	7.62464	2.57036	10.3668	0.342132
-40.08	42.98	22.3865	8.12701	3.98851	12.4296	0.50035
-158	22.75	24.417	8.78037	5.07088	14.2822	0.609477
-125.68	-9.3	20.0248	7.69452	2.93831	10.8428	0.38547
-75.35	34.71	20.4589	7.74541	3.10745	11.0797	0.404713
-158	22.75	25.207	9.09259	5.50576	15.0825	0.650693
-158	22.75	26.607	9.70462	6.25037	16.5453	0.716646
-24.02	5.17	28.7734	10.7263	7.19441	18.7083	0.784133
110	-24.5	21.9954	8.02958	3.79476	12.119	0.479885
-158	22.75	25.657	9.28214	5.75078	15.5495	0.673122
-178	-15	28.946	10.8078	7.25152	18.8644	0.786866
-158	22.75	24.867	8.95479	5.31889	14.7344	0.633189
-158	22.75	26.827	9.80589	6.36091	16.7752	0.725781
-158	22.75	27.087	9.92684	6.48827	17.0455	0.736028
-28.21	-3.92	27.1735	9.96736	6.52981	17.135	0.739298
-177.07	-32.73	17.7377	7.64153	2.26326	10.0408	0.303396
-158	22.75	26.397	9.60901	6.14276	16.3251	0.707561
-148.89	25.02	22.6606	8.2011	4.12799	12.6574	0.514904
168	-20	25.7691	9.33053	5.8112	15.6666	0.678554
-51.99	40.88	21.6509	7.95202	3.62981	11.8601	0.462227
-158	22.75	25.907	9.39063	5.88507	15.811	0.685138
-139.6	25.77	20.4625	7.74589	3.10892	11.0817	0.404878
-55	-43.58	11.5361	8.92124	2.28082	11.2326	0.267261
-36.13	43.32	22.8164	8.24529	4.20848	12.7904	0.523237
164.65	-19.22	28.0311	10.3735	6.91334	18.002	0.767358
-145.9	-16.76	19.0715	7.62881	2.6111	10.4161	0.347055
-148.89	25.02	22.6606	8.2011	4.12799	12.6574	0.514904
-158	22.75	24.697	8.88779	5.22521	14.5623	0.624294
-158	22.75	24.967	8.99481	5.37395	14.8362	0.63838
-158	22.75	24.357	8.75784	5.03785	14.2228	0.60628
-158	22.75	26.837	9.81052	6.36588	16.7857	0.726187
-9.23	47.43	20.5017	7.75114	3.12477	11.1044	0.406664
-158	22.75	27.187	9.97367	6.53622	17.1489	0.7398
-158	22.75	25.167	9.07612	5.48383	15.0413	0.648656
-77.23	14.28	21.2096	7.86423	3.42718	11.5497	0.440223
-14.84	-8.02	23.0508	8.31454	4.33106	12.9949	0.535835
-76.7	15.27	20.7845	7.79218	3.24204	11.2743	0.419788
-166.4	-27.07	18.4129	7.62011	2.42284	10.1983	0.323944
-158	22.75	25.687	9.29504	5.76697	15.5808	0.674583
-16.08	5.86	25.4954	9.2132	5.66323	15.3812	0.66518
110	-33.5	17.712	7.64294	2.25787	10.0361	0.302679
-158	22.75	24.787	8.9231	5.27482	14.6532	0.629014
-8.4	43.39	17.6148	7.64865	2.23792	10.0192	0.300011
26.31	-35.25	20.56	7.75915	3.14857	11.1386	0.40934
-45.3	42.56	21.8493	7.99574	3.72414	12.0075	0.472353
-8.83	42.36	15.3161	7.94916	1.97341	10.0035	0.25758
167.98	-25.18	17.6468	7.6467	2.24442	10.0247	0.300883
-19.49	9.71	29.3126	10.9792	7.36119	19.1838	0.791055
-9.7	48.45	14.7977	8.05562	1.96669	10.0941	0.253463
-158	22.75	26.897	9.83833	6.39557	16.8482	0.7286
-158	22.75	25.697	9.29935	5.77237	15.5912	0.675068
-20.54	12.76	29.8883	11.2421	7.49796	19.6465	0.792799
-158	22.75	23.377	8.41634	4.50431	13.2883	0.553451
-158	22.75	24.287	8.73178	4.99933	14.1537	0.602541
-22.28	9.05	23.9365	8.60505	4.80718	13.813	0.583709
-158	22.75	25.847	9.3644	5.85299	15.7481	0.682287
110	-35	17.2454	7.67587	2.16866	9.96758	0.290511
-20.01	39.87	18.2593	7.62231	2.38351	10.1566	0.318982
-30	57.86	13.2052	8.44795	2.05294	10.5493	0.252427
-8.44	43.42	16.1361	7.80764	2.02275	9.92764	0.268149
-158	22.75	26.697	9.74592	6.29588	16.6395	0.720432
-45.08	-26.18	22.6113	8.18743	4.1027	12.6159	0.512276
-8.44	43.42	15.0461	8.00307	1.96761	10.0467	0.255192
-153.42	23.91	22.9825	8.29403	4.29517	12.9348	0.532158
-158	22.75	25.327	9.14237	5.57142	15.2064	0.656764
-17.51	36.61	29.6547	11.1365	7.44802	19.465	0.792841
-158	22.75	26.287	9.55938	6.08565	16.2097	0.70267
-174.32	-31.32	17.8252	7.63706	2.282	10.0575	0.305872
-158	22.75	24.207	8.70229	4.95536	14.0752	0.598257
169.35	-27.4	18.3742	7.62051	2.41276	10.1875	0.322678
-75.95	16.56	21.0357	7.83327	3.35022	11.4342	0.431769
-22.94	7.58	27.7742	10.2512	6.80429	17.7468	0.759839
-158	22.75	26.667	9.73213	6.28075	16.6081	0.719178
-158	22.75	25.427	9.18429	5.62598	15.3101	0.661776
-158	22.75	24.807	8.931	5.28584	14.6735	0.630059
-131.5	-11.35	20.2055	7.71411	3.00724	10.9382	0.393355
-57.29	-50.99	6.75528	9.91964	3.02994	12.9553	0.338152
-88.38	25.51	25.2214	9.09856	5.51368	15.0974	0.651428
-153.42	23.91	22.9825	8.29403	4.29517	12.9348	0.532158
-158	22.75	24.137	8.67676	4.91693	14.0068	0.594501
179.82	-30.1	21.41	7.90248	3.51796	11.6877	0.450126
-158	22.75	24.137	8.67676	4.91693	14.0068	0.594501
-153.42	23.91	22.9825	8.29403	4.29517	12.9348	0.532158
-55	-43.58	11.4961	8.93281	2.28752	11.2505	0.267774
-30	41.19	23.0697	8.32028	4.34103	13.0117	0.536854
-25.78	1.29	26.4892	9.65087	6.19027	16.4219	0.711594
-158	22.75	23.567	8.47847	4.60646	13.4636	0.563733
-30	36.78	22.7032	8.21302	4.14988	12.6935	0.517175
168.1	-26	18.1065	7.62608	2.34617	10.1186	0.314214
-43.46	42.71	21.8611	7.99841	3.72978	12.0164	0.472956
-30	38.48	24.3777	8.76561	5.04927	14.2433	0.607386
-20.66	12.75	30.0783	11.3267	7.53263	19.7873	0.791969
-30	59.35	12.5254	8.63667	2.13193	10.8089	0.256771
-158	22.75	25.657	9.28214	5.75078	15.5495	0.673122
-158	22.75	23.187	8.35628	4.40303	13.1162	0.54318
-158	22.75	26.567	9.68632	6.23002	16.5034	0.714942
-158	22.75	25.797	9.34263	5.82618	15.6958	0.679895
110	-35	17.2354	7.67673	2.16693	9.96645	0.290268
-20.01	39.87	18.3793	7.62045	2.41407	10.1889	0.322843
-158	22.75	23.777	8.54949	4.72023	13.6608	0.575094
-158	22.75	24.137	8.67676	4.91693	14.0068	0.594501
-158	22.75	24.137	8.67676	4.91693	14.0068	0.594501
-78.61	11.79	20.8438	7.80149	3.26727	11.3113	0.422593
-139.6	25.77	20.5525	7.75811	3.1455	11.1342	0.408995
-158	22.75	24.607	8.85286	5.17559	14.4718	0.619552
-25.99	-28.79	19.069	7.62872	2.61035	10.4152	0.346965
-158	22.75	23.717	8.52895	4.68764	13.6041	0.57185
110	-35	17.2454	7.67587	2.16866	9.96758	0.290511
-175	-31.66	17.6337	7.64749	2.24176	10.0224	0.300526
-45.08	-26.18	22.8213	8.24671	4.21102	12.7946	0.523499
-13.98	48.06	13.3097	8.4198	2.04281	10.5123	0.251995
-158	22.75	23.837	8.57022	4.75289	13.7178	0.578336
110	-33.5	17.682	7.64463	2.25164	10.0308	0.301848
110	-32	19.0843	7.62928	2.61508	10.421	0.347535
-158	22.75	26.947	9.86156	6.42016	16.9002	0.730587
-139.45	-14.13	20.374	7.73442	3.07341	11.0312	0.400868
179.4	4.66	30.0488	11.3137	7.5276	19.7658	0.792146
-158	22.75	24.797	8.92705	5.28033	14.6633	0.629537
-127.31	-9.54	19.98	7.69001	2.92154	10.8198	0.383541
169.56	-27.71	18.4042	7.62019	2.42056	10.1959	0.323658
-22.28	9.05	29.4665	11.0503	7.40218	19.3125	0.792122
-158	22.75	26.587	9.69547	6.2402	16.5243	0.715796
-17.51	36.61	14.0947	8.21811	1.98597	10.2647	0.250928
-41.35	-29.31	17.4687	7.65838	2.20929	9.99648	0.296134
-74.8	24.03	20.0166	7.69367	2.93521	10.8385	0.385114
-57.29	-50.99	6.75528	9.91964	3.02994	12.9553	0.338152
-158	22.75	26.427	9.6226	6.15825	16.3566	0.70888
-26.4	-0.19	27.9159	10.3186	6.86515	17.8882	0.764089
-158	22.75	23.817	8.56329	4.742	13.6988	0.577256
-24.02	5.17	29.2834	10.9656	7.35307	19.1591	0.790805
-55	-43.58	11.4861	8.9357	2.2892	11.255	0.267903
170	-28.42	18.561	7.61948	2.46239	10.2418	0.328883
-165.8	-18.5	27.9674	10.3431	6.88682	17.9391	0.76557
-30	38.48	24.3777	8.76561	5.04927	14.2433	0.607386
110	-33.5	17.702	7.6435	2.25578	10.0343	0.302401
-158	22.75	23.837	8.57022	4.75289	13.7178	0.578336
-42.65	-29.33	21.3672	7.89408	3.49838	11.6578	0.447996
-18.21	47.37	17.535	7.65379	2.22209	10.0064	0.297875
-8.77	42.36	15.7161	7.87578	1.99141	9.95582	0.262107
168.7	-26.35	18.3336	7.62105	2.40233	10.1764	0.321363
-57.29	-50.99	6.79528	9.91779	3.02758	12.9512	0.33781
-165.92	-18.43	27.1274	9.94574	6.50772	17.0873	0.737563
110	-38	13.3215	8.41664	2.0417	10.5082	0.25195
-8.36	43.37	15.1548	7.98097	1.96934	10.0283	0.256089
-18.98	8.82	28.6915	10.6876	7.16614	18.633	0.782673
-158	22.75	24.277	8.72807	4.99383	14.1439	0.602006
-158	22.75	26.287	9.55938	6.08565	16.2097	0.70267
164.65	-19.22	26.9511	9.86346	6.42217	16.9045	0.730749
17.94	-34.94	13.4198	8.39046	2.03277	10.4743	0.251611
-28.94	29.18	24.2548	8.71988	4.98164	14.1221	0.600818
-178.98	-33.72	17.7347	7.64169	2.26264	10.0402	0.303313
-16.98	39.96	22.04	8.04019	3.81653	12.1536	0.482198
-78.43	29.08	19.9259	7.68475	2.90147	10.7924	0.381229
-158	22.75	27.497	10.1197	6.68078	17.4667	0.750847
-158	22.75	23.837	8.57022	4.75289	13.7178	0.578336
-18.98	8.82	28.8815	10.7774	7.23057	18.8065	0.7859
-78.13	28.68	20.5759	7.76137	3.15507	11.1479	0.41007
-158	22.75	23.837	8.57022	4.75289	13.7178	0.578336
-132.65	-11.76	18.1429	7.62504	2.35492	10.1274	0.315336
-18.21	47.37	17.515	7.65515	2.2182	10.0034	0.297346
-158	22.75	23.377	8.41634	4.50431	13.2883	0.553451
-8.4	43.39	14.5648	8.10729	1.96956	10.1448	0.252242
-7.6	48.12	20.4532	7.74466	3.10517	11.0764	0.404455
-158	22.75	23.647	8.50524	4.6497	13.5383	0.568063
-16.08	5.86	26.0554	9.45603	5.96399	15.9666	0.692099
-158	22.75	23.827	8.56676	4.74744	13.7083	0.577796
-30	41.19	23.0997	8.32941	4.35686	13.0383	0.538472
-14.3	-7.23	23.0762	8.32226	4.34446	13.0175	0.537205
-158	22.75	26.657	9.72754	6.2757	16.5976	0.718758
-20	47.01	14.7742	8.06073	1.96682	10.0989	0.253322
174.27	-20.75	26.93	9.85367	6.41183	16.8826	0.729916
-158	22.75	26.597	9.70004	6.24529	16.5348	0.716221
-21.76	30.05	21.1809	7.85898	3.41436	11.5304	0.438819
-165.88	-18.46	26.9874	9.88036	6.43993	16.9422	0.732176
-30	41.19	23.1097	8.33247	4.36214	13.0472	0.539011
-31.27	43.6	22.7085	8.21452	4.15262	12.698	0.517459
-76.61	15.41	21.1945	7.86146	3.42042	11.5395	0.439483
-18.25	-10.9	23.0753	8.32197	4.34396	13.0166	0.537154
-169.13	-28.55	18.6268	7.61969	2.4805	10.2621	0.331127
-158	22.75	27.507	10.1245	6.68533	17.4769	0.751187
-79.28	10.57	20.5065	7.75179	3.12672	11.1072	0.406884
-16.98	39.96	22.03	8.0378	3.81164	12.1458	0.481679
-146.93	-16.95	19.0301	7.62739	2.59835	10.4006	0.345519
-38.7	-27.32	16.4659	7.76094	2.05646	9.92185	0.273824
-79.3	30.23	20.3361	7.72968	3.05837	11.01	0.399165
-28.21	-3.92	27.1835	9.97205	6.53458	17.1453	0.739671
-20.66	12.75	22.3183	8.10933	3.95429	12.3743	0.496756
179	16	28.1821	10.4454	6.97483	18.1497	0.77139
-41.7	42.85	22.3428	8.11564	3.96655	12.3941	0.498044
-158	22.75	26.967	9.87086	6.42996	16.921	0.731376
-158	22.75	21.617	7.94481	3.61388	11.8354	0.460511
110	-32	19.0843	7.62928	2.61508	10.421	0.347535
-30	41.19	23.0997	8.32941	4.35686	13.0383	0.538472
167.43	-24.27	17.6202	7.64832	2.23901	10.0201	0.300158
-158	22.75	26.997	9.88483	6.44462	16.9522	0.732551
-30	36.78	24.5732	8.83984	5.15696	14.4379	0.617767
-77.39	15.45	20.852	7.80279	3.27076	11.3165	0.42298
-35.52	-19.91	23.9311	8.60316	4.80426	13.8079	0.58342
-158	22.75	26.997	9.88483	6.44462	16.9522	0.732551
-171.8	-29.96	17.8983	7.6337	2.29811	10.0722	0.307986
-26.4	-0.19	27.8959	10.3091	6.85666	17.8683	0.763504
-8.36	43.37	14.9448	8.02418	1.96673	10.0652	0.254433
-34.76	-18.27	25.5995	9.25751	5.7197	15.4895	0.670313
167.37	-24.2	18.1102	7.62597	2.34705	10.1195	0.314327
-78.98	29.8	20.5001	7.75092	3.12413	11.1035	0.406591
172.86	-32.85	17.6889	7.64424	2.25306	10.032	0.302039
-35.52	-19.91	23.9311	8.60316	4.80426	13.8079	0.58342
-153.42	23.91	22.9825	8.29403	4.29517	12.9348	0.532158
-158	22.75	26.087	9.47002	5.98068	15.9997	0.69356
-21	21.95	26.3895	9.60565	6.13892	16.3173	0.707234
18.07	-34.89	13.4098	8.39311	2.03366	10.4778	0.251643
-34.76	-18.27	25.6195	9.26607	5.73053	15.5104	0.671293
-175.96	-32.17	17.1602	7.68337	2.15417	9.95844	0.288466
110	-32	19.0843	7.62928	2.61508	10.421	0.347535
-158	22.75	24.797	8.92705	5.28033	14.6633	0.629537
-132.76	23.58	19.8159	7.6747	2.86128	10.7381	0.376582
-158	22.75	22.897	8.26871	4.25039	12.86	0.527557
-29.61	66.65	5.58681	9.88991	3.03102	12.9245	0.342496
-14.84	-8.02	23.0108	8.30249	4.31001	12.9596	0.53368
-158	22.75	22.537	8.16709	4.06471	12.5537	0.508319
-30	55.25	13.236	8.43964	2.0499	10.5383	0.252293
170.3	-28.88	18.1782	7.62412	2.36348	10.136	0.316431
-176.22	-32.3	18.1474	7.62492	2.356	10.1284	0.315474
-158	22.75	26.627	9.71378	6.26051	16.5662	0.717493
-34.76	-18.27	25.5995	9.25751	5.7197	15.4895	0.670313
-41.48	42.85	22.8728	8.26164	4.2378	12.8391	0.52626
-22.28	9.05	27.6465	10.1906	6.74812	17.6184	0.755807
172.86	-32.83	17.6289	7.64778	2.24077	10.0216	0.300394
-20	20.41	21.8804	8.00282	3.73907	12.031	0.473948
-174.92	-31.62	18.0116	7.6292	2.32386	10.0967	0.311336
-8.77	48.95	12.3974	8.67305	2.14914	10.8611	0.257868
-158	22.75	24.947	8.98677	5.36294	14.8158	0.637344
-75.35	34.73	20.5789	7.7618	3.15631	11.1497	0.410209
-74.03	20.42	20.5021	7.7512	3.12495	11.1047	0.406685
-158	22.75	26.907	9.84297	6.4005	16.8586	0.729
-74.71	18.8	20.8034	7.79512	3.25007	11.2861	0.420681
-74.02	20.12	20.3534	7.73183	3.06522	11.0197	0.399941
-158	22.75	26.737	9.76434	6.31598	16.6813	0.722093
-54.73	-43.43	13.4761	8.37556	2.02788	10.4553	0.251443
-8.44	43.42	12.8361	8.54934	2.09313	10.6863	0.254466
-17.51	36.61	16.9547	7.7033	2.12145	9.9406	0.283754
-28.48	5.92	29.3981	11.0187	7.38434	19.2557	0.7917
-158	22.75	26.427	9.6226	6.15825	16.3566	0.70888
-155.15	-20.75	18.9332	7.62452	2.56896	10.3652	0.341962
-57.29	-50.99	6.79528	9.91779	3.02758	12.9512	0.33781
-74.65	22.83	20.3071	7.72612	3.04693	10.9938	0.397868
-158	22.75	25.897	9.38625	5.87973	15.8005	0.684664
-25.99	-28.79	19.049	7.62803	2.60417	10.4077	0.346221
-144.41	26.15	21.2609	7.87377	3.45022	11.5846	0.442744
-8.77	48.95	12.3974	8.67305	2.14914	10.8611	0.257868
-8.1	48.75	10.4944	9.21799	2.46633	11.7066	0.282327
-158	22.75	24.797	8.92705	5.28033	14.6633	0.629537
-158	22.75	26.987	9.88018	6.43974	16.9418	0.73216
-27.34	-2.02	26.4228	9.62069	6.15608	16.3522	0.708696
-175.07	-31.7	17.6737	7.64511	2.24994	10.0293	0.301621
-18.98	8.82	28.8615	10.7679	7.22398	18.7884	0.785587
-8.44	43.42	12.8361	8.54934	2.09313	10.6863	0.254466
-152.66	-19.32	19.0357	7.62757	2.60007	10.4027	0.345726
-49.59	-35.71	14.9082	8.0319	1.96658	10.0721	0.254177
-8.5	43.45	16.9761	7.7011	2.12471	9.94218	0.28423
177	-30	21.1223	7.84843	3.38835	11.4913	0.435965
-57.29	-50.99	6.74528	9.92007	3.0305	12.9563	0.338235
-8.77	48.95	12.3774	8.67876	2.15189	10.8694	0.258047
-158	22.75	23.067	8.31944	4.33957	13.0092	0.536705
-21.79	26.54	22.7475	8.22556	4.17277	12.7312	0.519545
-35.95	-30.9	16.866	7.71271	2.10831	9.93473	0.281816
-29.94	65.88	3.06045	9.10058	2.3891	11.491	0.295302
-46.19	-32.61	19.957	7.68774	2.91296	10.8081	0.382554
-151.02	-18.35	18.8284	7.62214	2.53793	10.3284	0.338184
-158	22.75	22.567	8.17526	4.08001	12.5787	0.509914
-153	-19.5	18.8057	7.62173	2.53131	10.3206	0.337375
-34	25.8	27.4586	10.1016	6.66324	17.4276	0.749535
-123.78	29.61	16.0974	7.81353	2.01932	9.92927	0.267536
-21.57	-13.67	21.9446	8.01767	3.77012	12.08	0.477262
-158	22.75	23.657	8.50861	4.65512	13.5477	0.568604
168.75	-26.43	18.3236	7.6212	2.39977	10.1737	0.32104
-16.98	39.96	20.79	7.79303	3.24438	11.2777	0.420048
-127.81	26.55	18.9655	7.6254	2.57866	10.3768	0.343138
-42.65	-29.33	21.2872	7.87872	3.46207	11.6025	0.444038
-46.19	-32.61	20.027	7.69473	2.9391	10.8438	0.385561
-27.34	-2.02	26.6128	9.70727	6.25331	16.5513	0.716892
-41.35	-29.31	15.3887	7.93525	1.97583	9.99339	0.258314
-154.23	-20.22	18.8721	7.62304	2.55078	10.3435	0.339751
-158	22.75	26.907	9.84297	6.4005	16.8586	0.729
-178	-15	28.976	10.8219	7.2611	18.8912	0.787293
-20.42	35.67	17.8654	7.63517	2.29081	10.0655	0.30703
-16.93	5.1	28.102	10.4073	6.94248	18.0716	0.769289
-35.95	-30.9	21.256	7.87284	3.44799	11.5812	0.4425
-25.78	1.29	26.4892	9.65087	6.19027	16.4219	0.711594
-158	22.75	27.507	10.1245	6.68533	17.4769	0.751187
172.13	-31.73	17.9129	7.63307	2.30136	10.0753	0.308411
-30.95	-10.03	26.7546	9.77245	6.3248	16.6997	0.722821
-10.64	47.96	15.4843	7.91733	1.97959	9.98104	0.259339
-17.45	-10.23	23.2876	8.38783	4.45654	13.2069	0.548616
-54.73	-43.43	11.5461	8.91835	2.27916	11.2281	0.267134
-30	50.84	15.3002	7.95224	1.97293	10.0058	0.257425
-179.8	-34.13	17.4127	7.66247	2.19875	9.98856	0.294688
-77.68	28.03	20.2689	7.72151	3.03191	10.9727	0.396163
-158	22.75	25.907	9.39063	5.88507	15.811	0.685138
-158	22.75	27.087	9.92684	6.48827	17.0455	0.736028
-158	22.75	26.247	9.54141	6.06477	16.1677	0.70087
-158	22.75	24.397	8.77284	5.05987	14.2623	0.608412
-158	22.75	22.887	8.26578	4.24518	12.8513	0.52702
-29.94	65.88	2.81045	8.95413	2.26099	11.2164	0.284766
-27.34	-2.02	26.5328	9.67071	6.21256	16.4675	0.713475
-74.61	23.61	20.2453	7.71873	3.02271	10.9598	0.395117
-19.87	28.68	22.2206	8.08448	3.90554	12.2958	0.491621
-144.41	26.15	21.3709	7.8948	3.50008	11.6604	0.448181
-21.18	22.96	25.7793	9.33495	5.81667	15.6773	0.679044
179.4	4.66	29.9888	11.287	7.51697	19.7217	0.792451
-74.46	21.5	20.2668	7.72127	3.03113	10.9716	0.396073
-170.5	-29.28	18.2365	7.62278	2.37783	10.1507	0.318259
-42.37	-30.09	16.1509	7.80542	2.02408	9.92707	0.268385
47.48	-11.6	26.9149	9.84667	6.40442	16.8669	0.729317
-16.93	5.1	28.062	10.3882	6.92611	18.0324	0.768208
-21.57	-13.67	22.3046	8.10581	3.94743	12.3632	0.496035
173.73	-34.13	17.0418	7.69454	2.13492	9.94743	0.285711
-34.8	43.42	22.8885	8.26623	4.24597	12.8527	0.527102
-14.89	1.35	23.1039	8.33068	4.35904	13.042	0.538695
-79.45	10.25	20.7157	7.78169	3.21308	11.232	0.416561
-123.78	29.61	16.0974	7.81353	2.01932	9.92927	0.267536
-29.76	-7.48	27.5378	10.1391	6.69934	17.5083	0.752227
-150.15	-17.85	18.8237	7.62205	2.53654	10.3267	0.338015
-8.92	42.15	14.3776	8.15042	1.97443	10.1897	0.251536
-42.65	-29.33	21.3172	7.88443	3.47564	11.6231	0.445519
-75.35	17.65	20.8591	7.80393	3.27379	11.3209	0.423316
-158	22.75	22.317	8.10897	3.95359	12.3732	0.496683
-8.4	43.39	17.1048	7.68849	2.14502	9.95304	0.287163
179	11	29.8396	11.2203	7.48819	19.6094	0.792896
169.75	-28.03	18.0974	7.62635	2.344	10.1164	0.313935
-19.49	9.71	25.6426	9.27598	5.74303	15.5345	0.672423
-158	22.75	25.927	9.3994	5.89574	15.8319	0.686084
-21.18	22.96	25.7893	9.33929	5.82204	15.6877	0.679525
-30.95	-10.03	26.7446	9.76784	6.3198	16.6892	0.722408
-144.41	26.15	21.3009	7.88132	3.46828	11.6119	0.444715
-25.03	44.22	22.125	8.06079	3.85826	12.2201	0.486624
-8.77	42.36	13.2361	8.4396	2.04989	10.5382	0.252293
-21.79	26.54	22.7275	8.21989	4.16243	12.7142	0.518476
-153.58	-19.85	18.8694	7.62298	2.54995	10.3425	0.339651
-173.17	-30.7	17.9334	7.63221	2.30599	10.0796	0.309015
-46.19	-32.61	20.017	7.69371	2.93535	10.8387	0.38513
-127.81	26.55	18.1955	7.6237	2.3677	10.1403	0.31697
-19.87	28.68	13.8606	8.27628	1.99922	10.3327	0.250831
-123.78	29.61	16.0974	7.81353	2.01932	9.92927	0.267536
-8.83	42.22	15.5361	7.90781	1.9819	9.97482	0.259923
-177.61	-33	17.9071	7.63332	2.30007	10.0741	0.308242
-8.36	43.37	18.5948	7.61955	2.47165	10.2521	0.330031
-29.01	36.16	19.065	7.62858	2.60909	10.4137	0.346814
-158	22.75	23.377	8.41634	4.50431	13.2883	0.553451
-46.6	-33.15	15.1513	7.98166	1.96927	10.0289	0.256059
-8.86	42.22	14.9561	8.0218	1.9668	10.0631	0.254514
-162.56	-24.95	19.1863	7.63338	2.64714	10.4606	0.351381
-21.26	30.91	20	7.692	2.929	10.83	0.3844
-165.25	-26.43	18.8366	7.6223	2.54032	10.3312	0.338476
-17.45	-10.23	23.1376	8.34101	4.37686	13.072	0.540513
-158	22.75	23.977	8.61935	4.82929	13.8519	0.585891
-12.45	46.08	21.6164	7.94468	3.61361	11.835	0.460481
-42.91	-29.85	17.7509	7.64082	2.26606	10.0432	0.303766
-144.41	26.15	21.3709	7.8948	3.50008	11.6604	0.448181
169	-26.83	17.8973	7.63374	2.29788	10.072	0.307956
-78.68	29.42	20.0709	7.69929	2.95567	10.8666	0.387461
110	-18.4	20.0423	7.69631	2.94487	10.8518	0.386222
-8.37	43.36	18.1248	7.62554	2.35055	10.123	0.314776
-158	22.75	24.057	8.64789	4.87307	13.9291	0.5902
-8.36	43.37	15.2648	7.95914	1.97192	10.0111	0.257085
-158	22.75	27.077	9.92217	6.48345	17.0352	0.735646
-158	22.75	26.107	9.4789	5.99124	16.0207	0.694483
-8.44	43.42	14.6361	8.09123	1.9683	10.1286	0.252575
-78.85	11.33	20.7328	7.78427	3.22027	11.2425	0.417362
-17.05	32.43	16.643	7.73843	2.07793	9.92483	0.277213
-74.02	20.07	20.4334	7.74205	3.09717	11.065	0.403553
-131.85	24.13	19.441	7.64677	2.73046	10.566	0.361281
-21.97	27.25	25.2568	9.11321	5.53308	15.1339	0.653224
170.5	-29.2	18.2431	7.62264	2.37949	10.1525	0.31847
18.01	-33.62	9.97181	9.35944	2.5643	11.9426	0.290871
-177.23	-32.81	17.6177	7.64847	2.23851	10.0197	0.30009
-131.85	24.13	19.441	7.64677	2.73046	10.566	0.361281
-123.78	29.61	16.1074	7.812	2.02019	9.92883	0.267693
-163	-18.41	28.2946	10.499	7.01925	18.2585	0.774195
-135.41	-12.72	20.2756	7.72232	3.03456	10.9764	0.396464
-102.35	17.68	17.1492	7.68437	2.15233	9.95733	0.288205
-158	22.75	25.587	9.25215	5.71291	15.4765	0.669697
-24.02	5.17	29.4534	11.0443	7.39882	19.3017	0.792048
-131.85	24.13	19.441	7.64677	2.73046	10.566	0.361281
-35.52	-19.91	23.9211	8.59964	4.79879	13.7983	0.582881
179	11	29.8396	11.2203	7.48819	19.6094	0.792896
-23.22	44.46	22.1368	8.06367	3.86405	12.2293	0.487237
-127.81	26.55	18.1655	7.62444	2.36038	10.1329	0.316034
-38.7	-27.32	17.8959	7.63381	2.29756	10.0717	0.307914
-23.12	44.37	22.0263	8.03692	3.80983	12.1429	0.481487
-75.53	25.07	19.821	7.67515	2.86313	10.7406	0.376797
-158	22.75	23.797	8.55638	4.73111	13.6798	0.576175
-134.89	24.27	19.9032	7.68261	2.89309	10.7811	0.380263
-131.85	24.13	19.431	7.64616	2.7271	10.5617	0.360884
-158	22.75	24.467	8.79928	5.09843	14.3319	0.612136
-49.89	34.1	19.8977	7.68209	2.89107	10.7783	0.380029
-35.15	-24.6	19.9448	7.68656	2.90845	10.802	0.382035
-31.46	-11.24	27.5633	10.1511	6.71085	17.5341	0.753078
-54.02	41.83	21.9677	8.02306	3.78131	12.0977	0.478453
-29.12	-5.92	27.0662	9.91714	6.47825	17.024	0.735233
-29.27	-6.48	25.5228	9.22482	5.6781	15.4096	0.666535
-155.55	-20.96	18.7532	7.6209	2.51616	10.303	0.33552
-74.46	21.5	20.4268	7.74121	3.09455	11.0613	0.403258
-29.12	-5.92	27.1062	9.93584	6.49755	17.0654	0.736761
-24.08	-15.75	21.8499	7.99588	3.72444	12.008	0.472385
-8.36	43.37	18.6548	7.61986	2.48829	10.271	0.332089
-158	22.75	23.187	8.35628	4.40303	13.1162	0.54318
-19.24	12.79	16.5224	7.75356	2.06305	9.92234	0.27488
-20.66	12.75	28.3183	10.5103	7.02849	18.2814	0.774766
-21.76	30.05	21.5109	7.92275	3.56443	11.759	0.455167
-30	45.36	20.357	7.73229	3.06668	11.0217	0.400106
-35.95	-30.9	16.296	7.78424	2.03808	9.92301	0.270797
-21.26	30.91	20.02	7.69402	2.93649	10.8403	0.385261
-165.88	-18.46	28.7974	10.7377	7.20253	18.7302	0.78454
177	-30	21.4723	7.91492	3.54661	11.7316	0.453236
-143.38	-15.78	20.0727	7.69948	2.95636	10.8676	0.38754
-159.32	-23.12	18.9924	7.62619	2.58681	10.3866	0.344125
-153.78	-19.96	19.0419	7.62778	2.60198	10.405	0.345957
-158	22.75	23.407	8.42602	4.52038	13.3158	0.555074
-32.86	-14.11	25.6063	9.26044	5.72341	15.4967	0.670648
-132.76	23.58	19.6959	7.6647	2.81836	10.6809	0.371592
-158	22.75	25.227	9.10085	5.51671	15.1031	0.651709
-30	46.74	20.2028	7.7138	3.00621	10.9367	0.393237
-160	-18.27	28.7454	10.7131	7.18483	18.6827	0.783646
-74.33	21.17	20.3648	7.73327	3.06977	11.0261	0.400457
-34.84	-31.37	15.2848	7.95523	1.97248	10.0081	0.257276
-158	22.75	26.997	9.88483	6.44462	16.9522	0.732551
-27.45	-2.39	25.1675	9.07636	5.48414	15.0419	0.648685
-20	24.51	28.676	10.6803	7.16072	18.6187	0.782386
-18.98	8.82	21.7615	7.97607	3.68216	11.9417	0.467855
-158	22.75	23.977	8.61935	4.82929	13.8519	0.585891
-161.1	-24.13	19.1337	7.63117	2.63052	10.44	0.349389
-46.6	-33.15	15.1813	7.97565	1.96988	10.024	0.256321
-158	22.75	24.117	8.66951	4.90596	13.9874	0.593426
-158	22.75	23.047	8.31338	4.32903	12.9915	0.535627
-29.12	-5.92	27.0362	9.90313	6.46371	16.9929	0.734077
-74.65	22.7	20.1571	7.70863	2.98857	10.9122	0.391225
-20.42	35.67	17.8554	7.63563	2.28861	10.0635	0.306742
-74.65	22.46	20.3971	7.73737	3.08264	11.0443	0.401912
-132.76	23.58	19.6959	7.6647	2.81836	10.6809	0.371592
-77.32	27.55	20.4566	7.7451	3.1065	11.0783	0.404606
-19.87	28.68	24.7306	8.90095	5.24375	14.5962	0.626061
-158	22.75	26.467	9.64075	6.17884	16.3986	0.710627
-132.76	23.58	19.6959	7.6647	2.81836	10.6809	0.371592
-32.86	-14.11	25.6063	9.26044	5.72341	15.4967	0.670648
-74.73	18.74	21.1534	7.854	3.40213	11.512	0.437477
-39.6	-26.62	18.777	7.62125	2.523	10.3109	0.336359
-158	22.75	22.027	8.03708	3.81016	12.1434	0.481522
-17.44	5.98	28.3521	10.5263	7.04149	18.3137	0.775562
-158	22.75	22.217	8.08357	3.90373	12.2929	0.49143
-158	22.75	23.917	8.59817	4.79651	13.7943	0.582655
-158	22.75	24.567	8.83745	5.15354	14.4317	0.617438
-158	22.75	22.977	8.29237	4.29225	12.9299	0.531858
-170.08	-29.07	18.451	7.6198	2.43284	10.2092	0.325198
-170.9	-29.5	18.419	7.62005	2.42443	10.2	0.324144
-163.81	-25.65	19.0625	7.62849	2.60833	10.4127	0.346722
-171.05	-29.56	17.989	7.63003	2.31865	10.0917	0.310661
-77.18	27.35	20.3615	7.73286	3.06847	11.0243	0.400309
-20.78	-13.03	22.8511	8.25531	4.22647	12.8202	0.525093
-158	22.75	24.417	8.78037	5.07088	14.2822	0.609477
-8.77	48.95	11.4974	8.93244	2.2873	11.2499	0.267757
-158	22.75	23.907	8.59466	4.79105	13.7847	0.582116
-2.63	-5.86	21.3035	7.88182	3.46946	11.6137	0.444844
-158	22.75	21.027	7.83176	3.34639	11.4285	0.431346
-31.52	-21.74	21.4491	7.91024	3.53588	11.7151	0.452072
-75.27	24.68	20.1102	7.70348	2.9706	10.8873	0.389171
-14.89	1.35	23.2839	8.38665	4.45456	13.2036	0.548416
-161.64	-24.43	19.2995	7.63878	2.68362	10.5063	0.355731
-165.92	-18.43	28.6874	10.6856	7.16469	18.6292	0.782597
-54.4	-43.48	14.931	8.02709	1.96667	10.0678	0.254335
-43.33	42.71	22.623	8.19066	4.10869	12.6257	0.512899
-158	22.75	23.187	8.35628	4.40303	13.1162	0.54318
-158	22.75	25.677	9.29074	5.76158	15.5704	0.674096
-8.36	43.37	15.0748	7.99719	1.96799	10.0418	0.255421
-8.44	43.42	11.9361	8.80552	2.21649	11.0563	0.262488
-30	45.36	20.607	7.76578	3.16789	11.1664	0.411507
-20.42	35.67	16.6254	7.74058	2.07569	9.92434	0.276866
-30	49.44	16.6992	7.73167	2.08523	9.92668	0.278337
-55	-43.58	10.7861	9.1363	2.4125	11.5732	0.277792
-36.63	-22.15	24.9023	8.96888	5.33835	14.7703	0.635026
-21.19	31.57	24.8172	8.93506	5.29149	14.6839	0.630595
-8.89	42.17	14.0876	8.21986	1.98633	10.2667	0.250919
-8.5	43.45	16.8661	7.71269	2.10833	9.93474	0.28182
-28.24	-19.13	22.4196	8.13571	4.0052	12.4567	0.502098
-33.31	-15.17	27.1053	9.93542	6.49711	17.0645	0.736727
-30	45.36	20.427	7.74123	3.09463	11.0614	0.403266
-8.77	48.95	11.8774	8.8225	2.22562	11.0818	0.263146
-14.05	43.92	21.4469	7.90982	3.5349	11.7136	0.451966
-27.45	-2.39	25.1575	9.07225	5.47866	15.0316	0.648175
-28.24	-19.13	22.1396	8.06436	3.86544	12.2315	0.487384
-45.79	-26.72	23.4893	8.45284	4.56461	13.3916	0.559531
-158	22.75	22.457	8.14561	4.02409	12.4874	0.504075
-55.94	-47.62	7.09468	9.89863	3.00582	12.9111	0.334926
-75.7	25.3	20.191	7.71245	3.00165	10.9304	0.392717
-165.8	-18.5	28.6774	10.6809	7.16119	18.62	0.782411
-15.35	2.16	24.1082	8.66633	4.90113	13.9788	0.592953
-158	22.75	25.677	9.29074	5.76158	15.5704	0.674096
-158	22.75	26.477	9.6453	6.18398	16.409	0.711062
-102.35	17.68	21.9392	8.0164	3.76749	12.0758	0.476981
-158	22.75	23.897	8.59115	4.7856	13.7751	0.581576
-165.8	-18.5	28.6774	10.6809	7.16119	18.62	0.782411
-165.8	-18.5	28.6774	10.6809	7.16119	18.62	0.782411
-21.76	30.05	21.7509	7.97373	3.67711	11.9338	0.467314
-76.45	26.33	20.1754	7.71068	2.99561	10.922	0.392029
-20.78	-13.03	22.4511	8.14404	4.0211	12.4826	0.503763
-77.88	28.33	20.0789	7.70013	2.9587	10.8708	0.387808
-172.17	-30.17	17.9183	7.63284	2.30258	10.0764	0.308571
-21.76	30.05	21.7809	7.98037	3.6914	11.9561	0.468846
-29.61	66.65	5.86681	9.91286	3.04393	12.9608	0.342567
-76.93	27.02	20.2715	7.72183	3.03297	10.9742	0.396282
-39.6	-26.62	18.867	7.62293	2.54926	10.3417	0.339567
110	-11.5	23.4039	8.42504	4.51875	13.313	0.55491
-161.37	-24.27	19.1937	7.6337	2.6495	10.4635	0.351663
-158	22.75	24.487	8.80687	5.10945	14.3518	0.613199
-74.12	21.81	20.6068	7.76575	3.16782	11.1663	0.411499
-162.53	-24.93	19.0063	7.62662	2.59105	10.3917	0.344637
-21.78	26.22	25.3932	9.17008	5.60756	15.275	0.660087
-158	22.75	23.407	8.42602	4.52038	13.3158	0.555074
-158	22.75	26.487	9.64985	6.18911	16.4195	0.711497
-158	22.75	23.707	8.52555	4.68222	13.5947	0.571309
174.14	-34.74	17.5601	7.65213	2.22701	10.0104	0.298541
-163	-18.41	28.7646	10.7222	7.19139	18.7002	0.783981
-16.93	5.1	28.072	10.393	6.93021	18.0422	0.768481
-158	22.75	24.397	8.77284	5.05987	14.2623	0.608412
-35.95	-30.9	21.646	7.95097	3.6275	11.8565	0.461979
-160	-18.27	28.7554	10.7178	7.18826	18.6918	0.783821
-8.44	43.42	12.7361	8.57727	2.10514	10.7251	0.255151
-165.92	-18.43	28.8474	10.7613	7.21929	18.7756	0.785362
-158	22.75	23.747	8.5392	4.70393	13.6324	0.573472
-140.92	-14.71	20.427	7.74122	3.0946	11.0613	0.403263
-158	22.75	22.537	8.16709	4.06471	12.5537	0.508319
-165.92	-18.43	28.7174	10.6998	7.17514	18.6569	0.783145
-158	22.75	22.987	8.29535	4.29749	12.9387	0.532396
-158	22.75	24.297	8.73548	5.00483	14.1636	0.603075
-158	22.75	23.747	8.5392	4.70393	13.6324	0.573472
-163	-18.41	28.7546	10.7174	7.18797	18.6911	0.783806
-34.13	-23.8	20.9616	7.82069	3.31791	11.3861	0.428203
-158	22.75	24.407	8.7766	5.06538	14.2723	0.608945
-36.96	-22.92	20.836	7.80025	3.26393	11.3064	0.422222
-29.27	-6.48	25.5028	9.21633	5.66723	15.3888	0.665545
177.35	-35.56	17.5335	7.65389	2.22179	10.0062	0.297834
-21.19	31.57	24.4772	8.80317	5.10408	14.3421	0.612681
-163	-18.41	28.8346	10.7552	7.21504	18.764	0.785156
-160	-18.27	28.7554	10.7178	7.18826	18.6918	0.783821
-32.93	43.51	22.6686	8.20332	4.13208	12.6641	0.515329
-36.63	-22.15	24.9123	8.97287	5.34385	14.7805	0.635546
-36.63	-22.15	24.9623	8.99293	5.37137	14.8315	0.638138
-64.25	31.7	20.7452	7.78615	3.22548	11.2501	0.417943
-58.06	-47.21	6.09969	9.92398	3.04793	12.9763	0.342051
-165.88	-18.46	28.8074	10.7424	7.20591	18.7393	0.784708
-19.99	42.9	20.0072	7.69272	2.93169	10.8337	0.38471
-31.46	-11.24	27.5133	10.1275	6.68821	17.4834	0.751401
-158	22.75	24.327	8.74664	5.02134	14.1931	0.604678
-10.64	47.96	18.5443	7.61948	2.45785	10.2367	0.328319
-35.15	-24.6	19.6448	7.66074	2.80037	10.6571	0.369492
-70.03	39.23	14.3214	8.16363	1.97632	10.204	0.251372
171.17	-30.23	17.9828	7.63026	2.31722	10.0903	0.310475
-165.88	-18.46	28.8074	10.7424	7.20591	18.7393	0.784708
-158	22.75	24.317	8.74292	5.01584	14.1833	0.604144
-158	22.75	26.477	9.6453	6.18398	16.409	0.711062
-18.21	47.37	15.535	7.90801	1.98185	9.97494	0.25991
-36.08	-30.08	20.7083	7.78058	3.20998	11.2275	0.416215
-21.97	27.25	25.2568	9.11321	5.53308	15.1339	0.653224
-8.44	43.42	15.2361	7.96477	1.97116	10.0154	0.256817
-156.07	-21.28	18.7618	7.62102	2.51861	10.3058	0.335821
-158	22.75	25.687	9.29504	5.76697	15.5808	0.674583
-158	22.75	23.237	8.37189	4.42959	13.1612	0.545881
-154.78	-20.53	18.8541	7.62265	2.54545	10.3372	0.339102
-127.81	26.55	18.1655	7.62444	2.36038	10.1329	0.316034
-158	22.75	25.627	9.26926	5.73456	15.5182	0.671658
-139.21	-8.99	26.4876	9.65014	6.18944	16.4202	0.711525
-50.56	42.12	21.2118	7.86465	3.42819	11.5512	0.440334
-31.52	-21.74	21.5791	7.93684	3.59615	11.8079	0.458597
-157.4	-22.03	18.6822	7.62008	2.49599	10.2797	0.33304
-21.4	24.68	25.8097	9.34817	5.83302	15.7091	0.680506
-24.91	-16.43	22.2489	8.09162	3.91963	12.3184	0.493107
-39.19	-26.1	23.5059	8.4583	4.57357	13.407	0.560432
-158	22.75	22.647	8.19729	4.12096	12.6459	0.514174
-45.28	-25.77	23.2259	8.36843	4.42373	13.1512	0.545285
-158	22.75	23.767	8.54605	4.7148	13.6514	0.574553
-71.3	34.68	18.9657	7.62541	2.57873	10.3769	0.343146
-20.01	38.17	23.1234	8.33666	4.36936	13.0594	0.539748
-160	-18.27	28.7054	10.6942	7.17099	18.6459	0.782929
-158	22.75	24.177	8.69132	4.93889	14.0459	0.596648
-159.78	-23.4	19.1224	7.63072	2.62696	10.4356	0.348962
-36.96	-22.92	20.856	7.80343	3.27247	11.319	0.42317
-158	22.75	22.747	8.2254	4.17248	12.7308	0.519516
-68.07	40.51	20.7081	7.78055	3.20991	11.2274	0.416207
-158	22.75	22.317	8.10897	3.95359	12.3732	0.496683
-158	22.75	26.467	9.64075	6.17884	16.3986	0.710627
-158	22.75	26.527	9.66807	6.2096	16.4615	0.713226
-167.33	-27.56	18.8222	7.62203	2.53611	10.3262	0.337962
-8.44	43.42	17.2161	7.6784	2.16362	9.96432	0.289803
-34.13	-23.8	21.1016	7.84475	3.37916	11.4775	0.434955
-158	22.75	26.947	9.86156	6.42016	16.9002	0.730587
-36.26	-30.94	21.906	8.0087	3.75141	12.0505	0.475266
-66.28	40.46	20.6948	7.77856	3.20432	11.2192	0.415583
-158	22.75	25.327	9.14237	5.57142	15.2064	0.656764
-158	22.75	25.197	9.08847	5.50028	15.0722	0.650184
-102.35	17.68	25.8992	9.38723	5.88093	15.8028	0.684771
-39.19	-26.1	23.4559	8.44193	4.54668	13.3608	0.557726
-36.96	-22.92	20.996	7.82648	3.33288	11.4084	0.429856
-158	22.75	25.627	9.26926	5.73456	15.5182	0.671658
-158	22.75	25.117	9.05564	5.45639	14.9899	0.646101
-21.4	24.68	26.3597	9.59216	6.12347	16.286	0.705915
-156.86	-21.73	18.8268	7.62211	2.53745	10.3278	0.338126
-21.4	24.68	26.3397	9.58313	6.11309	16.265	0.705027
-163.06	-25.22	19.4847	7.64953	2.74522	10.585	0.363021
-168.53	-28.22	18.6732	7.62001	2.49344	10.2768	0.332726
-8.37	43.36	18.5748	7.6195	2.46616	10.246	0.329351
-8.36	43.37	18.7448	7.62079	2.51374	10.3002	0.335223
-111.78	-25.83	24.4555	8.79495	5.09214	14.3205	0.61153
-8.37	43.36	14.9348	8.02629	1.96668	10.0671	0.254362
-30	46.74	17.6728	7.64516	2.24975	10.0291	0.301596
-101.16	-29.72	23.4342	8.43485	4.53501	13.3408	0.556549
-24.08	-15.75	21.8699	8.00043	3.73405	12.0231	0.473412
-158	22.75	23.367	8.41313	4.49896	13.2792	0.55291
-158	22.75	25.517	9.22234	5.67494	15.4036	0.666247
-57.66	41.53	21.3063	7.88234	3.47071	11.6156	0.44498
-27.41	-18.46	22.7663	8.2309	4.18247	12.7473	0.520549
-19.99	42.9	20.3572	7.73231	3.06674	11.0218	0.400113
-158	22.75	22.797	8.23968	4.19837	12.7736	0.522192
-158	22.75	22.937	8.28049	4.2713	12.8949	0.529707
-10.63	46.86	20.9198	7.81376	3.29985	11.3594	0.426204
-158	22.75	22.257	8.09365	3.92363	12.3248	0.493528
-158	22.75	25.657	9.28214	5.75078	15.5495	0.673122
-158	22.75	23.067	8.31944	4.33957	13.0092	0.536705
-158	22.75	22.857	8.25703	4.22954	12.8253	0.52541
-37.76	-26.61	19.0097	7.62673	2.5921	10.393	0.344764
-30	61.91	11.1083	9.04455	2.35449	11.4259	0.273045
-155.23	-20.8	18.9132	7.62401	2.56298	10.358	0.341236
-15.91	44.93	22.458	8.14588	4.02461	12.4883	0.504131
-158	22.75	22.267	8.09619	3.92861	12.3329	0.494053
-158	22.75	22.277	8.09874	3.9336	12.3409	0.494579
-158	22.75	21.087	7.84218	3.37273	11.4678	0.434247
19.39	39.39	20.4646	7.74617	3.10975	11.0829	0.404972
-10.64	47.96	18.5843	7.61952	2.46877	10.2489	0.329674
-158	22.75	23.197	8.35939	4.40834	13.1252	0.54372
-158	22.75	23.087	8.32552	4.35012	13.027	0.537783
-8.93	47.56	20.7017	7.77959	3.20722	11.2235	0.415906
-40.71	-27.62	22.0056	8.032	3.79975	12.1269	0.480415
-30	42.7	17.4013	7.66333	2.19663	9.987	0.294397
-41.35	42.88	22.7228	8.21855	4.16	12.7102	0.518224
-30.88	63.33	9.92263	9.37235	2.57354	11.9644	0.291696
-20.01	38.17	23.1234	8.33666	4.36936	13.0594	0.539748
-37.76	-26.61	20.1497	7.70781	2.98572	10.9082	0.3909
-158	22.75	25.437	9.1885	5.63143	15.3204	0.662275
-21.19	31.57	24.8072	8.9311	5.28598	14.6737	0.630073
-158	22.75	25.117	9.05564	5.45639	14.9899	0.646101
-35.05	-18.86	22.883	8.26463	4.24312	12.8479	0.526808
-8.44	43.42	17.4661	7.65856	2.2088	9.9961	0.296067
-30	45.36	20.197	7.71314	3.00396	10.9336	0.392981
-27.45	-2.39	25.1775	9.08047	5.48963	15.0522	0.649195
-17.71	44.78	22.5427	8.16867	4.06766	12.5585	0.508627
47.51	-11.81	26.6198	9.7105	6.25688	16.5587	0.71719
-158	22.75	22.417	8.13501	4.00387	12.4545	0.501959
-158	22.75	23.407	8.42602	4.52038	13.3158	0.555074
-19.99	42.9	20.6372	7.77011	3.18036	11.1845	0.412904
-158	22.75	22.797	8.23968	4.19837	12.7736	0.522192
-158	22.75	21.197	7.86191	3.42154	11.5412	0.439605
-158	22.75	22.477	8.15094	4.03422	12.5039	0.505135
-59.08	41.42	21.3372	7.88827	3.48473	11.637	0.446509
-57.89	-51.93	5.25341	9.84809	3.00314	12.8543	0.341331
-39.19	-26.1	23.4459	8.43867	4.54131	13.3516	0.557184
-31.24	-10.78	25.2547	9.11234	5.53193	15.1318	0.653118
-40.71	-27.62	21.9956	8.02964	3.79488	12.1192	0.479897
32.89	33.92	23.6839	8.51771	4.6697	13.573	0.57006
-102.35	17.68	18.0992	7.6263	2.34443	10.1169	0.31399
-158	22.75	25.467	9.20116	5.64776	15.3516	0.663768
-158	22.75	22.337	8.11413	3.96362	12.3893	0.497736
-158	22.75	21.957	8.02054	3.77609	12.0894	0.477898
-11.8	46.37	21.2249	7.86705	3.43402	11.56	0.440972
-57.89	-51.93	5.21341	9.84197	2.99883	12.8438	0.341106
-158	22.75	26.867	9.82442	6.38075	16.8169	0.727397
-32.81	43.58	23.3383	8.40395	4.48362	13.253	0.551359
-158	22.75	21.957	8.02054	3.77609	12.0894	0.477898
-53.37	41.88	21.5547	7.93177	3.58479	11.7904	0.45737
-158	22.75	22.487	8.15362	4.03929	12.5122	0.505665
-158	22.75	22.207	8.08107	3.89877	12.2849	0.490906
-31.24	-10.78	25.2447	9.1082	5.52646	15.1215	0.652611
-28.03	43.95	22.7551	8.22772	4.1767	12.7377	0.519952
-158	22.75	24.397	8.77284	5.05987	14.2623	0.608412
-57.89	-51.93	5.25341	9.84809	3.00314	12.8543	0.341331
-158	22.75	22.337	8.11413	3.96362	12.3893	0.497736
-158	22.75	23.257	8.37817	4.44024	13.1792	0.546962
-158	22.75	21.627	7.94693	3.61857	11.8427	0.461017
-158	22.75	22.837	8.25122	4.21914	12.8081	0.524337
-158	22.75	22.237	8.0886	3.91367	12.3088	0.492479
-30.88	63.33	9.81263	9.40093	2.59418	12.013	0.293548
-21.78	26.22	25.2332	9.10341	5.52011	15.1095	0.652023
-42.73	42.78	22.573	8.17691	4.08311	12.5837	0.510237
-158	22.75	23.057	8.31641	4.3343	13.0004	0.536166
-39.76	43	23.1657	8.34971	4.39178	13.0972	0.542034
-102.35	17.68	19.7092	7.66575	2.82306	10.6871	0.37214
-8.37	43.36	17.9148	7.63299	2.30179	10.0757	0.308468
-158	22.75	20.267	7.72129	3.03117	10.9717	0.396078
-36.76	43.25	23.3525	8.4085	4.49122	13.266	0.552128
-36.08	-30.08	22.0583	8.04459	3.82549	12.1678	0.48315
-158	22.75	21.457	7.91183	3.53952	11.7207	0.452467
-158	22.75	22.857	8.25703	4.22954	12.8253	0.52541
-33.12	-14.9	24.9831	9.00129	5.38281	14.8527	0.639212
-158	22.75	22.147	8.06617	3.86907	12.2373	0.487769
-43.42	-30.3	21.4315	7.90675	3.52782	11.7028	0.451198
-21.81	29.5	25.5013	9.21569	5.66642	15.3873	0.665471
-158	22.75	21.347	7.89015	3.48916	11.6437	0.446992
-158	22.75	21.237	7.86929	3.43945	11.5683	0.441566
-46.62	-33.39	19.4213	7.64558	2.72386	10.5575	0.360501
-19.76	44.61	22.6162	8.18877	4.10519	12.6199	0.512534
-46.38	42.46	22.1458	8.06588	3.8685	12.2364	0.487707
-158	22.75	22.317	8.10897	3.95359	12.3732	0.496683
-158	22.75	21.157	7.85464	3.40371	11.5143	0.437651
-158	22.75	23.447	8.439	4.54185	13.3525	0.557239
-8.4	43.39	17.7948	7.63855	2.27543	10.0515	0.305006
-158	22.75	22.977	8.29237	4.29225	12.9299	0.531858
-158	22.75	22.457	8.14561	4.02409	12.4874	0.504075
-37.87	-24.35	23.6268	8.49847	4.63881	13.5195	0.566973
-37.87	-24.35	23.6168	8.49512	4.6334	13.5101	0.566432
-8.32	43.42	14.9461	8.0239	1.96674	10.0649	0.254443
-21.53	44.48	22.4987	8.15677	4.04526	12.5219	0.506289
-36.08	-30.08	16.7983	7.7202	2.09869	9.931	0.28038
-21.81	29.5	25.4813	9.20722	5.65555	15.3665	0.664479
-37.87	-24.35	23.6268	8.49847	4.63881	13.5195	0.566973
-33.12	-14.9	24.9631	8.99324	5.3718	14.8323	0.638178
-35.77	-30.67	15.3392	7.9447	1.97414	10.0002	0.25781
-29.73	43.83	23.094	8.32767	4.35384	13.0332	0.538164
-14.05	43.92	20.6869	7.7774	3.20105	11.2145	0.415217
-158	22.75	20.107	7.70314	2.96938	10.8856	0.389031
-158	22.75	24.857	8.95082	5.31338	14.7242	0.632668
-30	49.44	16.5792	7.74633	2.06992	9.92326	0.275965
-158	22.75	21.127	7.84926	3.3904	11.4943	0.436189
-46.62	-33.39	18.9113	7.62396	2.56241	10.3573	0.341166
-49.81	-36.06	19.8582	7.67847	2.87665	10.7588	0.378362
-158	22.75	22.507	8.15899	4.04945	12.5287	0.506726
-105	15.77	26.4856	9.64925	6.18844	16.4182	0.71144
-158	22.75	21.127	7.84926	3.3904	11.4943	0.436189
-57.89	-51.93	5.14341	9.83066	2.99076	12.8243	0.340669
-43.42	-30.3	21.4215	7.90476	3.52323	11.6957	0.450699
-158	22.75	21.657	7.95332	3.63267	11.8646	0.462536
-31.53	43.68	23.1285	8.33823	4.37206	13.0639	0.540024
-158	22.75	20.127	7.70531	2.97701	10.8961	0.389905
-26.66	44.07	22.7071	8.21413	4.15192	12.6968	0.517387
-34.84	-31.37	14.3548	8.15576	1.97517	10.1955	0.251467
-158	22.75	21.727	7.96847	3.66575	11.9161	0.466094
-57.89	-51.93	5.03341	9.81136	2.97672	12.7909	0.339862
-158	22.75	20.237	7.71775	3.01946	10.9553	0.394746
-158	22.75	20.367	7.73354	3.07062	11.0273	0.400552
-102.35	17.68	22.4992	8.1569	4.04551	12.5223	0.506315
-46.62	-33.39	19.0713	7.62881	2.61106	10.4161	0.34705
-35.77	-30.67	21.8992	8.00715	3.74817	12.0453	0.47492
-158	22.75	22.447	8.14295	4.01903	12.4792	0.503546
-21.81	29.5	25.5113	9.21993	5.67185	15.3977	0.665966
-158	22.75	21.767	7.97728	3.68476	11.9458	0.468135
-158	22.75	22.147	8.06617	3.86907	12.2373	0.487769
-158	22.75	21.267	7.8749	3.45294	11.5887	0.443041
-53.3	-39.35	19.0493	7.62803	2.60424	10.4077	0.346229
-158	22.75	20.877	7.8068	3.28144	11.3322	0.424165
-38.15	43.15	23.3421	8.40517	4.48566	13.2565	0.551565
-158	22.75	24.007	8.63002	4.8457	13.8808	0.587508
-102.35	17.68	21.9392	8.0164	3.76749	12.0758	0.476981
-158	22.75	21.127	7.84926	3.3904	11.4943	0.436189
-158	22.75	21.747	7.97286	3.67525	11.9309	0.467114
-158	22.75	19.467	7.64839	2.7392	10.5773	0.362312
-158	22.75	20.777	7.79101	3.23887	11.2697	0.419435
-35.05	-18.86	23.523	8.46392	4.58276	13.4228	0.561355
-158	22.75	23.817	8.56329	4.742	13.6988	0.577256
-53.3	-39.35	19.0593	7.62838	2.60732	10.4115	0.346601
-158	22.75	22.217	8.08357	3.90373	12.2929	0.49143
-158	22.75	20.597	7.76435	3.16374	11.1604	0.411041
-158	22.75	21.687	7.95977	3.64682	11.8866	0.464059
-158	22.75	21.657	7.95332	3.63267	11.8646	0.462536
-158	22.75	19.537	7.65299	2.76302	10.6081	0.365115
-158	22.75	21.907	8.00893	3.75189	12.0512	0.475317
-158	22.75	21.527	7.92604	3.57189	11.7705	0.455975
-158	22.75	24.857	8.95082	5.31338	14.7242	0.632668
-20.01	38.17	23.0734	8.32139	4.34296	13.0149	0.537051
-158	22.75	21.387	7.89794	3.5074	11.6715	0.448978
-57.89	-51.93	5.10341	9.82386	2.98585	12.8126	0.340393
-158	22.75	21.327	7.8863	3.48008	11.6299	0.446002
-19.82	35.87	23.4977	8.45559	4.56913	13.3994	0.559985
-158	22.75	24.857	8.95082	5.31338	14.7242	0.632668
-158	22.75	27.147	9.95492	6.51711	17.1076	0.738303
-36.2	-31.05	15.406	7.93199	1.97646	9.99108	0.258494
-158	22.75	20.697	7.77889	3.20524	11.2206	0.415685
-158	22.75	21.037	7.83348	3.35076	11.435	0.431829
-158	22.75	21.667	7.95546	3.63738	11.8719	0.463044
-30	45.36	17.207	7.67919	2.16206	9.96333	0.289583
-158	22.75	21.467	7.91384	3.54413	11.7278	0.452967
-158	22.75	20.357	7.73228	3.06665	11.0217	0.400103
-105	15.77	25.3656	9.15854	5.59255	15.2465	0.658708
-158	22.75	19.987	7.6907	2.92413	10.8233	0.38384
-158	22.75	21.127	7.84926	3.3904	11.4943	0.436189
-105	15.77	26.7856	9.7868	6.34034	16.7321	0.724097
-36.08	-30.08	16.6883	7.73296	2.0838	9.92628	0.278118
-8.32	43.42	15.5561	7.90417	1.98284	9.9725	0.260154
-158	22.75	22.507	8.15899	4.04945	12.5287	0.506726
-158	22.75	20.957	7.81992	3.31592	11.3832	0.427982
-158	22.75	21.157	7.85464	3.40371	11.5143	0.437651
-158	22.75	19.967	7.68872	2.91668	10.8132	0.382982
-158	22.75	21.057	7.83694	3.35953	11.4481	0.432795
-158	22.75	20.227	7.71658	3.01557	10.9498	0.394303
-158	22.75	21.357	7.89209	3.49371	11.6507	0.447488
-158	22.75	21.097	7.84394	3.37714	11.4744	0.434732
-158	22.75	18.637	7.61974	2.48331	10.2653	0.331475
-49.81	-36.06	19.8682	7.67938	2.8803	10.7638	0.378784
-158	22.75	19.987	7.6907	2.92413	10.8233	0.38384
-158	22.75	20.277	7.72248	3.03509	10.9772	0.396523
-158	22.75	21.077	7.84042	3.36832	11.4613	0.433762
-158	22.75	19.277	7.63763	2.67628	10.497	0.354858
-158	22.75	21.427	7.90583	3.52572	11.6996	0.450969
-158	22.75	17.727	7.64211	2.261	10.0388	0.303096
-53.3	-39.35	19.0593	7.62838	2.60732	10.4115	0.346601
-158	22.75	22.387	8.12713	3.98874	12.43	0.500374
-158	22.75	27.137	9.95024	6.51232	17.0972	0.737926
-105	15.77	27.2056	9.98244	6.54511	17.1682	0.740494
-36.08	-30.08	22.0583	8.04459	3.82549	12.1678	0.48315
-49.81	-36.06	19.9482	7.6869	2.90973	10.8037	0.382182
-158	22.75	21.457	7.91183	3.53952	11.7207	0.452467
-55.88	-48	4.41106	9.66501	2.86385	12.531	0.332337
-158	22.75	20.407	7.73863	3.08658	11.0499	0.402357
-158	22.75	27.137	9.95024	6.51232	17.0972	0.737926
-8.87	42.18	14.4976	8.12261	1.97105	10.1605	0.25196
-43.42	-30.3	21.4315	7.90675	3.52782	11.7028	0.451198
-158	22.75	18.467	7.61971	2.43708	10.2138	0.325729
-55.88	-48	4.40106	9.66212	2.86154	12.5258	0.332173
-158	22.75	20.067	7.69888	2.95419	10.8646	0.387292
-30.66	-21.06	21.8261	7.99049	3.713	11.99	0.47116
-8.32	43.42	15.3761	7.93764	1.97538	9.9951	0.258184
-102.35	17.68	21.3592	7.89252	3.49474	11.6522	0.4476
-158	22.75	20.777	7.79101	3.23887	11.2697	0.419435
-8.32	43.42	15.2461	7.9628	1.97142	10.0139	0.25691
-19.82	35.87	23.5977	8.48872	4.62307	13.4923	0.565398
-102.35	17.68	20.4492	7.74413	3.10354	11.0741	0.404272
-19.82	35.87	23.5977	8.48872	4.62307	13.4923	0.565398
-154	-20.09	18.9521	7.62503	2.57464	10.372	0.342651
-55.88	-48	4.06106	9.55302	2.77316	12.3281	0.325674
-8.77	42.36	13.7561	8.30281	2.00617	10.3647	0.250904
-8.79	42.23	16.0561	7.81989	2.01578	9.93123	0.266895

## Sheet: projections_SSP2-4.5
longitude	latitude	temperature	heterotrophic bacteria (µgC L-1)	autotrophic picoplankton (µgC L-1)	total picoplankton (µgC L-1)	ratio (AP:HB)
-30.68	9.56	29.23	10.9408	7.33794	19.1134	0.790311
-47.3	-27.2	22.9508	8.28458	4.27853	12.907	0.53045
-30.06	8.53	29.4488	11.0422	7.39763	19.2979	0.792021
-20.02	41.49	18.9802	7.62583	2.58312	10.3822	0.343678
-30.06	8.53	29.4588	11.0468	7.40021	19.3061	0.792079
-16.28	44.9	22.96	8.28733	4.28338	12.9151	0.530947
-100.56	-0.35	21.6098	7.9433	3.61055	11.8302	0.460151
12	-18.99	13.791	8.29391	2.00378	10.3539	0.250871
-9.02	47.55	22.1646	8.07052	3.87778	12.2513	0.488689
-30.68	9.56	27.43	10.0881	6.65012	17.3985	0.748548
-32.29	12.24	28.2322	10.4693	6.99475	18.1983	0.77266
17.88	-32.24	9.25101	9.53969	2.69797	12.2524	0.303097
-45.46	-25.42	17.4387	7.66054	2.20362	9.99218	0.295357
-32.29	12.24	28.1122	10.4121	6.94662	18.0816	0.769561
-63.73	40.68	20.5294	7.75492	3.13606	11.1206	0.407934
-179.73	-34.37	20.047	7.69679	2.94665	10.8542	0.386427
-136.63	-13.15	20.9066	7.81161	3.29418	11.351	0.425577
-140.58	-9.11	28.1889	10.4486	6.97752	18.1563	0.771563
179.45	-50.48	8.5121	9.699	2.82528	12.5357	0.315408
-21.47	21.76	24.3224	8.74493	5.01881	14.1886	0.604433
-14.01	44.68	19.5307	7.65256	2.76088	10.6053	0.364864
-8.77	42.36	18.2731	7.62205	2.38698	10.1602	0.319421
66.49	18.57	27.795	10.2611	6.81334	17.7677	0.760479
-29	5.98	29.6631	11.1404	7.44994	19.4717	0.792858
-30	55.25	15.4179	7.92973	1.97691	9.9895	0.25862
-17.43	41.08	20.9668	7.82157	3.3202	11.3895	0.428456
-44.7	-27.4	21.9474	8.01831	3.77145	12.0821	0.477403
-44.7	-27.4	21.5474	7.93025	3.58138	11.7851	0.457001
-131.32	-11.28	21.1738	7.85769	3.4112	11.5256	0.438472
-45.4	-26.3	23.6502	8.50634	4.65147	13.5414	0.568239
-20	16.38	20.617	7.7672	3.172	11.1724	0.411968
-21.01	13.8	24.9788	8.99956	5.38044	14.8483	0.63899
-98.93	0.23	21.5745	7.93589	3.59403	11.8047	0.458368
-85.28	5.12	18.8684	7.62296	2.54966	10.3422	0.339615
-25	-2.24	27.5768	10.1576	6.71695	17.5479	0.753528
110	-12.5	27.6807	10.2068	6.76328	17.6528	0.756905
-36.46	19.05	25.9511	9.40999	5.9086	15.8572	0.687221
-113.53	-4.98	21.8624	7.99872	3.73043	12.0174	0.473025
-121.81	-7.93	21.8439	7.9945	3.72152	12.0034	0.472072
-30	55.25	15.4179	7.92973	1.97691	9.9895	0.25862
-30	55.25	15.4179	7.92973	1.97691	9.9895	0.25862
110	-12.5	27.6807	10.2068	6.76328	17.6528	0.756905
-14.01	44.68	18.0907	7.62656	2.34241	10.1149	0.31373
-85	5.22	19.9368	7.68579	2.90548	10.7979	0.381692
-79.68	8.13	18.6313	7.61971	2.48175	10.2635	0.331282
-83.83	5.64	20.0816	7.70043	2.95975	10.8723	0.387928
-13.14	-2.12	22.0423	8.04075	3.81766	12.1554	0.482319
-20	16.38	20.617	7.7672	3.172	11.1724	0.411968
-12.27	46.18	22.5462	8.16961	4.06943	12.5614	0.508811
177.53	-52.12	8.34597	9.73035	2.85159	12.5926	0.318053
-64.51	40.98	20.9984	7.8269	3.33395	11.41	0.429974
-25	-10.6	27.578	10.1581	6.71747	17.5491	0.753566
73.89	6.03	32.2798	12.1706	7.45878	20.8353	0.72045
-80.51	31.95	21.8107	7.98702	3.70562	11.9784	0.470371
170	-28.41	19.5436	7.65344	2.76528	10.6111	0.365381
-25	-10.6	27.588	10.1628	6.72197	17.5592	0.753896
-14.06	46.49	14.176	8.19838	1.98215	10.2423	0.251047
-45.5	-28.4	22.1581	8.06893	3.87459	12.2462	0.488352
-13.2	-1.37	23.2095	8.36331	4.41501	13.1365	0.544399
-58.12	40.8	20.6523	7.77231	3.18662	11.1935	0.413605
-28.21	-3.92	26.142	9.49451	6.00972	16.0575	0.696096
-47.8	-30.7	22.4699	8.14907	4.03066	12.4981	0.504763
-83.95	5.6	20.1275	7.70536	2.97721	10.8964	0.389927
-25	-2.24	25.9568	9.41252	5.91166	15.8632	0.687492
-14.06	46.49	14.116	8.21293	1.98493	10.2588	0.250955
-28.21	-3.92	23.852	8.57546	4.7611	13.7322	0.57915
159.9	-18	27.4306	10.0884	6.65037	17.3991	0.748567
168.57	-26.14	18.9526	7.62504	2.57478	10.3721	0.342668
-20.42	35.67	19.073	7.62887	2.61158	10.4167	0.347113
-176.48	-10.33	30.0989	11.3358	7.53606	19.8021	0.791835
-25	-10.6	27.588	10.1628	6.72197	17.5592	0.753896
179.58	57	4.30922	9.63472	2.83959	12.4764	0.33059
-107.22	-2.73	21.7105	7.96489	3.65797	11.9039	0.465258
-21.56	22.17	24.7923	8.9252	5.27775	14.6586	0.629292
66.53	18.57	27.805	10.2659	6.81767	17.7777	0.760784
-93.28	2.25	20.3752	7.73458	3.07391	11.032	0.400925
-100.27	-0.23	21.6072	7.94275	3.60931	11.8283	0.460018
-95.4	1.44	20.711	7.78098	3.21109	11.2291	0.416339
-25	-10.6	27.588	10.1628	6.72197	17.5592	0.753896
164.59	-19.22	29.1011	10.8806	7.29992	19.0017	0.788914
-130	-10.81	21.4498	7.9104	3.53624	11.7157	0.452111
-32.57	24.33	25.3654	9.15844	5.59241	15.2462	0.658696
-86.25	4.77	19.9091	7.68316	2.89527	10.784	0.380514
-6.17	-2.81	16.6832	7.73357	2.08313	9.92611	0.278016
110	-11.5	27.7775	10.2528	6.80575	17.7502	0.759942
-21.01	13.8	23.4788	8.44938	4.55894	13.3818	0.55896
-84.52	2.08	27.0987	9.93231	6.49392	17.0576	0.736474
12	-18.99	23.031	8.30857	4.32065	12.9775	0.534769
167.9	-25.05	18.6217	7.61966	2.47907	10.2605	0.33095
-30	55.25	15.4279	7.92785	1.9773	9.98819	0.258726
71.64	0	32.2236	12.1533	7.47339	20.8248	0.723901
-30	50.84	17.1537	7.68396	2.15308	9.95778	0.288312
-132.46	-11.68	21.2003	7.86252	3.42301	11.5434	0.439766
-99.2	0.13	21.8145	7.98789	3.70746	11.9813	0.470568
159.9	-18	28.4306	10.5637	7.07137	18.3886	0.777355
-33.61	14.43	26.6925	9.74387	6.29364	16.6348	0.720247
-23.63	6.08	28.5358	10.6137	7.11043	18.488	0.77962
0.6	-8.62	21.5526	7.93134	3.58383	11.7889	0.457266
-158	22.75	27.0719	9.91981	6.48101	17.0299	0.735452
-74.46	37.66	20.854	7.80311	3.2716	11.3177	0.423074
-45.5	-28.4	22.3581	8.11962	3.97424	12.4065	0.498852
-47.6	-30.8	20.5699	7.76054	3.15263	11.1444	0.409795
-30	50.84	17.0637	7.69241	2.1384	9.94932	0.286213
159.9	-18	27.5606	10.1499	6.70963	17.5314	0.752988
179.55	50	6.27368	9.9278	3.04718	12.9797	0.34135
-76.03	34.3	20.1961	7.71303	3.0036	10.9331	0.39294
-93	2.36	20.9852	7.82466	3.32819	11.4014	0.429338
-46.62	-33.39	19.6865	7.66395	2.81504	10.6764	0.371205
-28.95	43.88	22.559	8.17309	4.07596	12.572	0.509491
110	-11.5	27.8375	10.2813	6.83169	17.8102	0.761768
-47.1	-27.7	23.2573	8.37828	4.44043	13.1796	0.546982
-90.71	3.17	20.4362	7.74243	3.09832	11.0666	0.403683
-21.01	13.8	26.9188	9.84845	6.40631	16.8709	0.72947
-30	61.91	12.6396	8.60438	2.11716	10.7632	0.255863
110	-11.5	27.7775	10.2528	6.80575	17.7502	0.759942
-46.6	-27.9	22.6676	8.20303	4.13155	12.6633	0.515273
-179	58.9	5.48682	9.87907	3.02414	12.9066	0.342274
12	-18.99	12.581	8.62092	2.12467	10.7865	0.256321
-79.94	31.1	21.3755	7.8957	3.50217	11.6636	0.448409
-142.56	-8.91	28.5422	10.6168	7.11276	18.494	0.779751
14.32	-24.75	18.203	7.62352	2.36957	10.1422	0.317208
-170.72	-18.17	25.7377	9.31694	5.79432	15.6338	0.677041
-158	22.75	25.6319	9.27139	5.73724	15.5233	0.6719
-62.85	41.1	20.7106	7.78092	3.21093	11.2289	0.41632
-30	59.35	12.7933	8.56129	2.09822	10.7029	0.254753
-51.58	42.05	20.473	7.74729	3.11316	11.0878	0.405356
-19.87	29.18	24.2664	8.72415	4.988	14.1335	0.601438
-6.17	-2.81	15.0032	8.01196	1.96715	10.0544	0.254862
14.32	-24.75	15.633	7.89036	1.98673	9.96408	0.261069
-19.17	44.46	22.4552	8.14514	4.02319	12.486	0.503982
-25	-2.24	27.1768	9.96892	6.53139	17.1384	0.739422
0.61	-8.63	16.2426	7.79189	2.03275	9.92418	0.269892
-131.17	-11.22	21.1238	7.84869	3.38899	11.4922	0.436035
-13.2	-1.37	22.7495	8.22613	4.17381	12.733	0.519653
-47.3	-27.2	23.3508	8.40795	4.4903	13.2644	0.552035
69.98	14.6	31.1021	11.7558	7.61659	20.4229	0.773952
-138.07	-13.65	20.8469	7.80198	3.26858	11.3133	0.422738
-13.2	-1.37	23.1395	8.34162	4.3779	13.0738	0.540619
164.59	-19.22	29.2711	10.9599	7.34961	19.1486	0.790696
4.69	-31.03	15.6835	7.88146	1.98952	9.95896	0.261693
-22.94	7.58	28.4085	10.5532	7.06304	18.3676	0.77686
-110.45	-3.88	21.7959	7.98372	3.69858	11.9674	0.469616
-95.07	1.61	20.3632	7.73306	3.06913	11.0252	0.400383
-6.17	-2.81	22.4932	8.15529	4.04247	12.5173	0.505997
-84.59	-2.01	24.4354	8.78733	5.08104	14.3005	0.610459
-12.85	-2.14	21.9154	8.01087	3.75595	12.0576	0.47575
-158	22.75	26.3919	9.60672	6.14015	16.3198	0.707339
-13.14	-2.12	19.1923	7.63364	2.64906	10.4629	0.35161
-30	59.35	12.7933	8.56129	2.09822	10.7029	0.254753
16.45	-29.52	16.0401	7.82239	2.01444	9.93206	0.266649
-30	53.56	15.368	7.93919	1.9751	9.99622	0.2581
-90.35	3.31	20.9364	7.81651	3.30704	11.37	0.427
-73.23	40.48	20.8237	7.79831	3.25871	11.2987	0.421641
-15.45	29.18	22.3444	8.11606	3.96735	12.3954	0.498129
-14.06	46.49	14.206	8.19115	1.98084	10.2342	0.251102
-158	22.75	25.7519	9.32309	5.80197	15.6487	0.677727
-20	16.38	17.177	7.68186	2.15697	9.96015	0.288864
0.61	-8.63	21.1826	7.8593	3.41514	11.5316	0.438904
-53.3	-39.35	18.7065	7.62033	2.50285	10.2876	0.333885
0.6	-8.62	17.3426	7.66787	2.18589	9.97929	0.292914
-32.57	24.33	25.3254	9.14172	5.57057	15.2048	0.656686
38.24	21.98	29.7221	11.1671	7.46321	19.5182	0.792937
-33.61	14.43	27.0825	9.92476	6.48613	17.0409	0.735858
110	-20	26.221	9.52978	6.0512	16.1404	0.699697
-132.65	-11.75	21.1703	7.85705	3.40963	11.5232	0.4383
-32.57	24.33	25.4954	9.2132	5.66322	15.3812	0.665179
-47.1	-30.6	21.3699	7.89461	3.49963	11.6597	0.448132
-54.4	-43.48	13.8525	8.27833	1.99974	10.3351	0.250834
-77.35	33.45	20.1372	7.70643	2.98092	10.9016	0.390352
-12.72	-1.36	21.5611	7.9331	3.58777	11.795	0.457692
-36.04	42.23	21.6094	7.94321	3.61035	11.8299	0.46013
-158	22.75	25.9319	9.40157	5.89838	15.8371	0.686318
-123.07	-8.38	21.6639	7.95481	3.63596	11.8697	0.46289
-45.5	-26.2	23.8923	8.58953	4.78307	13.7707	0.581326
-29.76	-7.48	28.8453	10.7603	7.2186	18.7737	0.785328
-33.61	14.43	27.0825	9.92476	6.48613	17.0409	0.735858
-14.06	46.49	14.186	8.19596	1.98171	10.2396	0.251065
-45.7	-25.9	23.1282	8.33813	4.37189	13.0636	0.540007
47.46	-11.64	27.2408	9.99895	6.56178	17.2044	0.74179
110	-18.5	26.7101	9.75199	6.30251	16.6532	0.720981
-30	59.35	12.8033	8.5585	2.09702	10.699	0.254685
-30	53.56	15.398	7.93349	1.97617	9.99214	0.25841
-102.35	17.68	19.7309	7.66751	2.83078	10.6974	0.373039
110	-21.5	25.1795	9.08127	5.4907	15.0542	0.649294
-55.94	-47.62	9.58125	9.45965	2.63736	12.1135	0.297472
-29.02	17.87	27.2935	10.0237	6.5866	17.2586	0.743707
-74.91	35.08	20.6502	7.77201	3.18578	11.1923	0.41351
-127.03	-9.78	21.1605	7.85528	3.40529	11.5167	0.437824
-45.51	40.99	21.3831	7.89718	3.50563	11.6688	0.448785
-2.63	-5.86	17.5352	7.65378	2.22212	10.0065	0.297879
164.59	-19.22	28.8411	10.7583	7.21721	18.77	0.785261
-170.74	-18.18	25.6377	9.27387	5.74036	15.5294	0.672182
159.9	-18	28.0506	10.3828	6.9214	18.0212	0.767896
-69.88	40.55	21.9459	8.01796	3.77072	12.0809	0.477326
-45.85	-24.67	15.3475	7.94311	1.97441	9.99906	0.257893
-8.36	43.37	20.816	7.79709	3.25542	11.2939	0.421276
-32.57	24.33	25.4854	9.20896	5.65778	15.3708	0.664683
-8.77	42.36	18.4731	7.61967	2.43871	10.2156	0.325932
-134.02	-12.23	21.0975	7.84404	3.37739	11.4748	0.434759
-158	22.75	26.3019	9.5661	6.09345	16.2254	0.70334
-170.74	-18.18	24.2677	8.72465	4.98874	14.1348	0.60151
-158	22.75	26.3819	9.6022	6.13497	16.3093	0.706898
110	-14	28.0506	10.3828	6.92143	18.0212	0.767898
177.33	28	23.3156	8.39672	4.4715	13.2324	0.550132
-22.87	32.68	21.6935	7.96119	3.64992	11.8914	0.464393
-20	16.38	19.767	7.6705	2.84366	10.7145	0.374537
-106.8	-2.58	21.6076	7.94283	3.60949	11.8286	0.460037
-22.87	32.68	22.7235	8.21876	4.16037	12.7108	0.518262
-15.35	2.16	24.8163	8.93468	5.29097	14.6829	0.630546
-29.01	-5.14	28.5319	10.6119	7.109	18.4843	0.779539
-158	22.75	25.6419	9.27568	5.74265	15.5338	0.672388
-158	22.75	26.8619	9.82208	6.37825	16.8117	0.727194
-45.7	-25.9	23.5282	8.46563	4.58554	13.4276	0.561634
-25	-21.63	26.4486	9.63243	6.16941	16.3793	0.709828
-158	22.75	26.4019	9.61125	6.14532	16.3303	0.70778
176.38	-20.71	27.4382	10.0919	6.65386	17.4068	0.74883
-158	22.75	27.6319	10.1837	6.74163	17.6036	0.755334
-21.01	13.8	26.9888	9.88101	6.44062	16.9437	0.732231
-2.63	-5.86	16.7052	7.73096	2.08603	9.9269	0.278459
-158	22.75	25.6219	9.2671	5.73183	15.5129	0.671411
-45.46	-25.42	19.7787	7.67149	2.84787	10.7202	0.375026
-158	22.75	23.6719	8.51366	4.66322	13.5617	0.569413
110	-38	14.525	8.11635	1.97041	10.154	0.252071
-22.8	43.99	22.1691	8.07165	3.88002	12.2549	0.488926
-20	39.9	16.5856	7.74552	2.07071	9.9234	0.276089
110	-14	28.0506	10.3828	6.92143	18.0212	0.767898
-20.02	41.49	15.9702	7.83343	2.00883	9.93603	0.265603
-14.05	43.92	18.8628	7.62284	2.54803	10.3403	0.339417
-46.9	-31.1	19.6697	7.66264	2.80912	10.6686	0.370514
110	-38	14.565	8.10725	1.96956	10.1447	0.252242
-36.46	19.05	26.4711	9.64263	6.18096	16.4029	0.710807
-158	22.75	26.0119	9.4368	5.94094	15.921	0.690073
-2.63	-5.86	13.9352	8.25755	1.99464	10.3104	0.250822
14.32	-24.75	16.203	7.79767	2.02893	9.92529	0.269234
-158	22.75	24.2519	8.71882	4.98006	14.1193	0.600665
110	-14	28.0406	10.378	6.91731	18.0114	0.767623
110	-21.5	25.5995	9.2575	5.71969	15.4895	0.670312
-12.85	-2.14	16.4754	7.75969	2.05755	9.92191	0.274
-158	22.75	23.8719	8.58239	4.77194	13.7512	0.580224
-8.1	48.75	12.6956	8.58865	2.11014	10.741	0.255444
-175.67	-19.99	26.1783	9.51069	6.02881	16.0956	0.697755
-87.43	4.35	20.2131	7.71498	3.01019	10.9423	0.393691
-30	59.35	12.7933	8.56129	2.09822	10.7029	0.254753
-17.43	41.08	15.6268	7.89146	1.9864	9.96473	0.260993
-82.75	6.02	19.3261	7.64017	2.6923	10.5173	0.356763
-104	-1.58	21.4247	7.9054	3.52471	11.698	0.450859
-139.71	-14.15	20.9573	7.81998	3.31608	11.3834	0.428
110	-20	26.141	9.49405	6.00919	16.0565	0.696049
-158	22.75	26.1819	9.5123	6.0307	16.0994	0.697919
-158	22.75	26.7619	9.77584	6.32848	16.7073	0.723123
-25.99	-28.79	21.8104	7.98697	3.70551	11.9783	0.470358
-127.69	35.42	14.2719	8.17537	1.97816	10.2168	0.251245
110	-14	28.0406	10.378	6.91731	18.0114	0.767623
-21.22	17.79	25.6769	9.2907	5.76153	15.5703	0.674092
-35.52	-19.91	25.7088	9.30446	5.77876	15.6036	0.675643
-8.44	43.42	16.3701	7.77387	2.04584	9.92203	0.272091
110	-38	14.435	8.13705	1.9727	10.1756	0.251727
-30	53.56	15.388	7.93539	1.97581	9.99349	0.258306
-123.02	-8.35	21.7339	7.97	3.66906	11.9212	0.466449
-27.2	44.02	22.6678	8.2031	4.13166	12.6634	0.515285
-46.01	-24.36	20.1429	7.70706	2.9831	10.9046	0.390601
176.38	-20.71	27.0782	9.92273	6.48403	17.0364	0.735692
174.27	-20.75	28.1912	10.4497	6.97844	18.1585	0.771622
-77.41	13.93	21.7969	7.98393	3.69903	11.9681	0.469664
-128.33	-10.23	21.3503	7.8908	3.49068	11.646	0.447158
-94.43	1.83	21.6132	7.94401	3.61212	11.8327	0.460321
170.72	-29.54	19.803	7.67358	2.85661	10.7319	0.376041
-21.01	13.8	26.3088	9.56919	6.09701	16.2326	0.703647
-28.95	43.17	22.1229	8.06025	3.85719	12.2183	0.486511
-158	22.75	25.9619	9.41476	5.91436	15.8686	0.687731
-158	22.75	26.9219	9.84992	6.40786	16.8742	0.729595
179.55	50	6.04368	9.92195	3.0475	12.9737	0.34222
-158	22.75	23.6819	8.51705	4.66864	13.5711	0.569954
-158	22.75	25.8319	9.35784	5.84493	15.7324	0.681568
-158	22.75	24.8919	8.96474	5.33264	14.7597	0.634487
-46.2	-28.1	22.7676	8.23127	4.18313	12.7484	0.520618
-141.96	-15.15	20.971	7.82227	3.32202	11.3922	0.428657
0.6	-8.62	17.4426	7.66026	2.20435	9.99273	0.295458
-30	53.56	15.368	7.93919	1.9751	9.99622	0.2581
-158	22.75	28.0219	10.3691	6.90956	17.993	0.767105
-112.23	-4.51	21.8174	7.98853	3.70884	11.9835	0.470716
34.83	27.16	26.9517	9.86376	6.42248	16.9051	0.730774
-34.9	22.23	25.9366	9.40361	5.90086	15.842	0.686536
-140.71	-14.63	20.9006	7.81063	3.29159	11.3472	0.42529
-43.29	-30.14	19.414	7.64514	2.72142	10.5544	0.360213
-109.55	-3.56	21.7646	7.97675	3.68363	11.944	0.468013
110	-15.5	27.3876	10.0681	6.63052	17.3551	0.747065
-36.46	19.05	26.5011	9.65627	6.19635	16.4343	0.712108
47.49	-11.8	27.4395	10.0926	6.65446	17.4081	0.748875
-172.81	-19.5	26.6799	9.73806	6.28726	16.6216	0.719718
-114.23	-5.58	21.8583	7.99778	3.72844	12.0143	0.472813
110	-39.5	12.534	8.63424	2.1308	10.8055	0.256701
47.42	-11.74	27.0408	9.90528	6.46595	16.9977	0.734255
-158	22.75	26.9319	9.85456	6.41278	16.8846	0.729992
-158	22.75	26.3219	9.57511	6.10385	16.2464	0.704234
-158	22.75	26.5319	9.67033	6.21213	16.4667	0.713439
-175.67	-19.99	25.4683	9.20174	5.6485	15.353	0.663835
-10.8	46.78	22.5358	8.16679	4.06415	12.5527	0.50826
-25	-2.24	25.9368	9.40374	5.90101	15.8423	0.68655
-8.44	43.42	17.3701	7.66571	2.19089	9.98284	0.293605
-33.93	43.48	22.3166	8.10888	3.9534	12.3728	0.496663
-158	22.75	24.9519	8.98876	5.36567	14.8209	0.637601
110	-20	26.091	9.47182	5.98282	16.004	0.693748
-158	22.75	24.8919	8.96474	5.33264	14.7597	0.634487
-13.98	48.06	15.202	7.97152	1.97034	10.0207	0.256506
-47.1	-27.7	23.1573	8.34711	4.38732	13.0897	0.54158
-158	22.75	26.9519	9.86386	6.42259	16.9054	0.730783
-35.83	18.04	26.2089	9.52438	6.04488	16.1278	0.699149
-47.1	-27.8	23.0839	8.32459	4.34851	13.0243	0.537619
-32.38	43.6	22.3293	8.11216	3.9598	12.3832	0.497335
-91.32	2.96	20.5862	7.76283	3.15932	11.1541	0.410546
172.12	-21.37	28.3279	10.5148	7.03218	18.2905	0.774992
-35.8	21.41	25.8779	9.37791	5.86955	15.7805	0.68376
-25.63	1.9	14.1157	8.21299	1.98494	10.2588	0.250954
-75.99	34.33	20.3861	7.73596	3.07825	11.0381	0.401415
-21.93	10.06	28.823	10.7498	7.21115	18.7535	0.784966
-158	22.75	26.2519	9.54364	6.06736	16.1729	0.701094
-158	22.75	26.3219	9.57511	6.10385	16.2464	0.704234
-34.23	42.46	21.6056	7.9424	3.60854	11.8271	0.459935
-49.59	-35.71	15.2026	7.97142	1.97035	10.0206	0.256511
-65.43	40.64	21.3772	7.89603	3.50295	11.6647	0.448494
37.22	23.36	28.1991	10.4535	6.98163	18.1663	0.771826
-26.27	24.78	27.4854	10.1143	6.67549	17.4549	0.750453
-91.58	2.87	21.0323	7.83267	3.34871	11.432	0.431602
110	-39.5	12.534	8.63424	2.1308	10.8055	0.256701
110	-17	27.2612	10.0085	6.57141	17.2254	0.742535
-135.48	-12.75	20.9756	7.82303	3.32399	11.3952	0.428875
110	-17	27.2812	10.0179	6.58083	17.2459	0.743263
-21.93	10.06	28.543	10.6171	7.11304	18.4947	0.779768
178.64	-20.97	27.0334	9.90185	6.46237	16.99	0.73397
-102.94	6.33	29.1869	10.9207	7.32545	19.0763	0.789875
110	-21.5	25.6795	9.29183	5.76294	15.573	0.674219
-158	22.75	23.3019	8.39237	4.4642	13.22	0.549392
-158	22.75	25.2319	9.10289	5.51943	15.1082	0.65196
-30	53.56	14.188	8.19547	1.98162	10.2391	0.251068
172.12	-21.37	28.3279	10.5148	7.03218	18.2905	0.774992
-34.83	-31.16	16.5066	7.7556	2.06119	9.92216	0.274583
-10.56	46.9	22.2858	8.101	3.93804	12.3481	0.495046
-158	22.75	24.9519	8.98876	5.36567	14.8209	0.637601
-158	22.75	26.0119	9.4368	5.94094	15.921	0.690073
-158	22.75	23.0819	8.32398	4.34746	13.0225	0.537511
-158	22.75	26.4519	9.63392	6.1711	16.3828	0.709972
-170.83	-18.25	25.0077	9.01123	5.39635	14.8779	0.640484
-158	22.75	26.2519	9.54364	6.06736	16.1729	0.701094
-54.4	-43.48	13.8825	8.27077	1.99784	10.3261	0.250825
-90.22	3.35	20.5764	7.76145	3.1553	11.1483	0.410094
110	-17	27.2912	10.0226	6.58553	17.2562	0.743625
-92.05	2.7	20.4008	7.73783	3.0841	11.0464	0.402077
162.12	-18.62	27.6239	10.1799	6.73805	17.5955	0.755073
-158	22.75	24.9319	8.98073	5.35466	14.8005	0.636564
-25.63	1.9	15.0657	7.99905	1.96786	10.0433	0.255348
-158	22.75	26.2519	9.54364	6.06736	16.1729	0.701094
-108.23	-3.08	21.7517	7.97391	3.67751	11.9344	0.467357
-30	49.44	18.7592	7.62099	2.51787	10.3049	0.33573
-158	22.75	27.2119	9.98538	6.54809	17.1746	0.740726
178.64	-20.97	27.0434	9.90651	6.46722	17.0004	0.734357
53.99	-16.96	27.4513	10.0981	6.65988	17.4202	0.749283
-158	22.75	26.2519	9.54364	6.06736	16.1729	0.701094
-30	50.84	17.2337	7.67687	2.16664	9.96627	0.290228
172.12	-21.37	28.5179	10.6052	7.10386	18.4711	0.779245
-158	22.75	26.8819	9.83135	6.38814	16.8325	0.727998
-46.66	42.45	21.056	7.83677	3.3591	11.4475	0.432747
-35.8	21.41	25.8779	9.37791	5.86955	15.7805	0.68376
-15.35	2.16	24.8563	8.95054	5.313	14.7235	0.632632
-21.93	10.06	29.473	11.0533	7.40384	19.3178	0.792157
-158	22.75	23.6519	8.50691	4.65239	13.543	0.568331
-71.7	40.51	21.5948	7.94014	3.60351	11.8193	0.459392
-136.73	-13.07	21.0015	7.82742	3.33528	11.412	0.430121
14.32	-24.75	16.773	7.72307	2.09519	9.92977	0.279852
-126.8	-9.7	21.2805	7.87745	3.45905	11.5979	0.443708
-54.73	-43.43	9.43418	9.49588	2.66454	12.1761	0.299977
110	-15.5	27.4076	10.0775	6.63977	17.3756	0.747766
-158	22.75	26.8619	9.82208	6.37825	16.8117	0.727194
-153.68	0	28.1557	10.4328	6.96421	18.124	0.770706
47.42	-11.74	26.8408	9.8123	6.36779	16.7897	0.726342
-158	22.75	27.3819	10.0654	6.62788	17.3493	0.746865
178.64	-20.97	26.7534	9.77193	6.32424	16.6985	0.722774
4.14	-11.62	20.7591	7.78827	3.23132	11.2586	0.418595
-158	22.75	26.5819	9.69316	6.23764	16.519	0.715581
-158	22.75	27.3819	10.0654	6.62788	17.3493	0.746865
43.29	-15.34	27.7242	10.2275	6.78247	17.6967	0.758285
-21	21.95	24.5424	8.82802	5.13998	14.4071	0.616136
-158	22.75	25.7219	9.31012	5.78582	15.6173	0.676278
-21.71	33.62	20.5925	7.76372	3.16192	11.1578	0.410837
-21.93	10.06	29.123	10.8908	7.30651	19.0208	0.789171
-178.51	-20.45	27.4675	10.1058	6.66731	17.4367	0.749841
-158	22.75	26.6619	9.72982	6.2782	16.6028	0.718966
-25	-21.63	26.4486	9.63243	6.16941	16.3793	0.709828
-13.85	45.48	22.6213	8.19018	4.1078	12.6242	0.512807
-25.72	30.29	22.1735	8.07272	3.88217	12.2583	0.489153
-32.57	24.33	25.4754	9.20473	5.65235	15.3604	0.664187
-158	22.75	26.2719	9.55262	6.07781	16.1939	0.701995
-46.9	-28	23.2839	8.38667	4.45459	13.2036	0.548418
4.69	-31.03	15.7235	7.8745	1.99185	9.95512	0.262202
-35.83	18.04	26.5089	9.65986	6.20038	16.4426	0.712448
-134.05	-12.23	21.0775	7.84052	3.36857	11.4616	0.43379
-158	22.75	26.4519	9.63392	6.1711	16.3828	0.709972
162.12	-18.62	28.1439	10.4272	6.95946	18.1125	0.770398
-24.61	43.75	22.1364	8.06358	3.86388	12.229	0.487219
-29	-16.61	27.8815	10.3023	6.85054	17.854	0.763081
-54.4	-43.48	13.9025	8.26574	1.99661	10.3201	0.250822
-178.51	-20.45	27.5875	10.1626	6.72174	17.5587	0.75388
110	-15.5	27.3776	10.0634	6.62588	17.3449	0.746713
-158	22.75	22.7519	8.22681	4.17504	12.735	0.519781
-132.38	-11.66	21.1003	7.84452	3.37859	11.4766	0.434892
-172.81	-19.5	27.4699	10.1069	6.6684	17.4391	0.749922
-98.03	0.55	21.7762	7.97934	3.68918	11.9527	0.468609
-175.67	-19.99	27.0583	9.91346	6.47443	17.0158	0.73493
-34.9	22.23	26.0766	9.4654	5.97518	15.9888	0.693079
-158	22.75	25.8619	9.37093	5.86099	15.7638	0.682999
110	-15.5	27.3776	10.0634	6.62588	17.3449	0.746713
-178.51	-20.45	27.6075	10.1721	6.73071	17.5789	0.754537
-8.89	42.17	17.8273	7.63695	2.28246	10.0579	0.305932
-54.91	40.82	20.8626	7.80449	3.2753	11.3232	0.423484
-109.2	-3.39	21.7242	7.96787	3.66445	11.914	0.465954
47.51	-11.81	27.2395	9.99833	6.56115	17.203	0.741741
110	-27.5	21.8384	7.99326	3.71889	11.9993	0.471791
162.12	-18.62	28.1139	10.4129	6.94731	18.0832	0.769606
-55.94	-47.62	9.17125	9.55828	2.71234	12.285	0.304452
162.12	-18.62	28.1239	10.4177	6.95137	18.093	0.769871
-158	22.75	25.6719	9.28857	5.75885	15.5651	0.673851
-158	22.75	23.9919	8.62466	4.83747	13.8663	0.586697
-158	22.75	24.1819	8.69313	4.94161	14.0507	0.596914
-158	22.75	22.8619	8.25847	4.23212	12.8296	0.525675
-13.98	48.06	15.232	7.96558	1.97106	10.016	0.256779
-21.26	30.91	20.9223	7.81418	3.30095	11.361	0.426326
-158	22.75	24.7819	8.92111	5.27203	14.6481	0.62875
-158	22.75	25.9419	9.40597	5.90371	15.8476	0.686789
-158	22.75	23.9919	8.62466	4.83747	13.8663	0.586697
-26.47	-0.13	27.5681	10.1534	6.713	17.539	0.753237
-117.83	-6.51	21.7513	7.97382	3.67731	11.9341	0.467335
-158	22.75	25.2819	9.12362	5.5468	15.1598	0.654492
-24.41	29.18	24.6199	8.85785	5.18271	14.4847	0.620234
-111.02	-4.08	21.8334	7.99213	3.7165	11.9955	0.471535
-158	22.75	26.2919	9.56161	6.08824	16.2149	0.702893
-46.01	-24.36	15.9429	7.83782	2.00673	9.93776	0.265204
-17.43	41.08	25.6068	9.26065	5.72367	15.4972	0.670672
-35.83	18.04	26.5089	9.65986	6.20038	16.4426	0.712448
-31.46	-11.24	28.8758	10.7747	7.2287	18.8014	0.785811
-19.71	44.61	22.7214	8.21817	4.15931	12.709	0.518152
162.12	-18.62	28.1539	10.432	6.96349	18.1223	0.770659
-178.51	-20.45	26.3575	9.59116	6.12232	16.2837	0.705816
-94	2	20.4272	7.74125	3.09469	11.0615	0.403273
-21.56	22.17	24.7823	8.92125	5.27223	14.6484	0.628769
4.14	-11.62	13.1091	8.47408	2.06276	10.584	0.252882
-36.46	19.05	26.5111	9.66083	6.20147	16.4448	0.712541
-158	22.75	24.7419	8.90538	5.24999	14.6076	0.626654
-158	22.75	25.9419	9.40597	5.90371	15.8476	0.686789
-35.2	-20.94	23.7846	8.55211	4.72437	13.6681	0.575505
-158	22.75	26.6319	9.71605	6.26303	16.5714	0.717703
-175.67	-19.99	27.0383	9.90412	6.46474	16.9951	0.734159
-35.83	18.04	26.5089	9.65986	6.20038	16.4426	0.712448
-116.61	-6.08	21.8229	7.98977	3.71148	11.9876	0.470998
110	-26	23.5678	8.47875	4.60691	13.4644	0.563779
110	-23	25.2366	9.10485	5.52202	15.1131	0.6522
110	-15.5	27.4076	10.0775	6.63977	17.3756	0.747766
-8.77	42.36	18.0431	7.6281	2.33118	10.1038	0.312284
-21.71	33.62	23.2425	8.37364	4.43256	13.1662	0.546182
-25	-24.88	24.0434	8.64302	4.86563	13.916	0.589468
-8.44	43.42	20.2701	7.72166	3.0324	10.9734	0.396218
-26.47	-0.13	27.2881	10.0212	6.58406	17.253	0.743512
-158	22.75	26.2319	9.53467	6.05691	16.1519	0.70019
110	-26	23.0678	8.31969	4.34001	13.01	0.53675
-158	22.75	25.7219	9.31012	5.78582	15.6173	0.676278
-158	22.75	23.9619	8.61402	4.82107	13.8374	0.58508
-45	-28.7	22.1581	8.06893	3.87459	12.2462	0.488352
-29	-9.09	28.7995	10.7387	7.20327	18.7322	0.784577
-19.56	44.63	22.4014	8.13093	3.99604	12.4419	0.501139
-158	22.75	26.9019	9.84063	6.39801	16.8533	0.728798
-158	22.75	24.4919	8.80876	5.11218	14.3567	0.613462
-158	22.75	24.1219	8.67131	4.90868	13.9922	0.593692
-125.75	-9.32	21.4119	7.90286	3.51883	11.689	0.450221
-35.8	21.41	25.8779	9.37791	5.86955	15.7805	0.68376
173.26	-33.44	19.4811	7.64929	2.74397	10.5834	0.362875
110	-27.5	21.7184	7.9666	3.66168	11.9097	0.465657
-153.68	0	28.1457	10.4281	6.96018	18.1142	0.770445
-8.1	48.75	12.7056	8.58584	2.1089	10.7371	0.255371
110	-11.5	27.3375	10.0445	6.60723	17.3038	0.74529
-172.81	-19.5	24.8399	8.94402	5.30396	14.7068	0.631777
-8.92	42.26	18.1631	7.6245	2.3598	10.1323	0.31596
-57.27	41.56	20.6711	7.77506	3.19445	11.2049	0.41448
-32.57	24.33	25.4854	9.20896	5.65778	15.3708	0.664683
-24.99	-20.49	26.2539	9.54451	6.06838	16.1749	0.701182
-158	22.75	24.8419	8.94484	5.3051	14.7089	0.631884
-158	22.75	26.4919	9.6521	6.19165	16.4247	0.711711
-158	22.75	23.8919	8.58938	4.78284	13.7703	0.581304
-8.77	42.36	18.4231	7.62002	2.4255	10.2012	0.324278
-158	22.75	25.6319	9.27139	5.73724	15.5233	0.6719
-158	22.75	23.0819	8.32398	4.34746	13.0225	0.537511
-158	22.75	25.0519	9.02914	5.42067	14.9231	0.642763
-158	22.75	26.6019	9.70231	6.24781	16.54	0.716432
-49.82	-35.65	18.3845	7.62039	2.41544	10.1904	0.323015
-8.5	43.45	17.4901	7.65687	2.21339	9.99962	0.296692
-21.71	33.62	23.1525	8.34563	4.38479	13.0854	0.541321
4.14	-11.62	14.0291	8.23424	1.98935	10.2832	0.250864
-8.1	48.75	12.6956	8.58865	2.11014	10.741	0.255444
-20	47.01	17.1603	7.68337	2.15417	9.95844	0.288467
-92.68	2.46	20.4842	7.74879	3.11769	11.0943	0.405866
-158	22.75	23.5219	8.46356	4.58217	13.4218	0.561295
-158	22.75	26.5319	9.67033	6.21213	16.4667	0.713439
-21.22	17.79	26.0569	9.45668	5.96477	15.9682	0.692167
-37.26	35.91	18.157	7.62466	2.35833	10.1308	0.315772
165	-19.5	28.3252	10.5136	7.03114	18.2879	0.774928
176.38	-20.71	26.6482	9.72351	6.27125	16.5884	0.718388
-158	22.75	23.9119	8.5964	4.79376	13.7894	0.582383
-12.77	3.07	20.0414	7.69622	2.94455	10.8513	0.386187
-46.12	-32.8	18.2745	7.62202	2.38733	10.1606	0.319466
-21.06	11.74	28.4117	10.5547	7.06424	18.3706	0.776931
-158	22.75	25.0219	9.01698	5.40417	14.8924	0.641218
-158	22.75	22.9719	8.29086	4.2896	12.9255	0.531587
-8.77	42.36	17.8331	7.63668	2.28372	10.059	0.306099
-55.6	-47.59	6.82918	9.91609	3.02547	12.9475	0.337512
47.49	-11.8	27.3395	10.0454	6.60814	17.3058	0.74536
-158	22.75	25.6819	9.29287	5.76425	15.5755	0.674337
-20	47.01	15.7103	7.8768	1.99107	9.95637	0.262032
165	-19.5	28.3152	10.5088	7.02727	18.2783	0.77469
-25	-13.93	24.2701	8.72555	4.99008	14.1372	0.60164
-158	22.75	26.2719	9.55262	6.07781	16.1939	0.701995
-158	22.75	23.5019	8.45697	4.5714	13.4032	0.560213
-158	22.75	26.2419	9.53915	6.06214	16.1624	0.700642
-26.47	-0.13	27.5681	10.1534	6.713	17.539	0.753237
-158	22.75	27.8919	10.3072	6.85496	17.8643	0.763386
-2.63	-5.86	16.6552	7.73694	2.07949	9.92519	0.277455
-158	22.75	24.4919	8.80876	5.11218	14.3567	0.613462
-158	22.75	25.4219	9.18216	5.62323	15.3048	0.661524
-25.72	30.29	23.3635	8.41201	4.49708	13.276	0.552721
-158	22.75	23.5019	8.45697	4.5714	13.4032	0.560213
110	-30.5	20.4507	7.74433	3.10414	11.0749	0.40434
-53.86	41.85	20.6765	7.77586	3.19672	11.2082	0.414733
4.14	-11.62	19.1291	7.63099	2.62907	10.4382	0.349216
-158	22.75	25.6719	9.28857	5.75885	15.5651	0.673851
-158	22.75	26.3319	9.57962	6.10905	16.2569	0.70468
110	-30.5	20.4407	7.74301	3.10012	11.0692	0.403886
-158	22.75	23.6419	8.50354	4.64697	13.5336	0.56779
-158	22.75	26.3019	9.5661	6.09345	16.2254	0.70334
-49.82	-35.65	18.7345	7.62065	2.51081	10.2968	0.334863
-54.4	-43.48	14.0125	8.23834	1.99025	10.2879	0.250852
17.71	42.21	18.9817	7.62587	2.58357	10.3827	0.343733
-158	22.75	23.7419	8.53747	4.70119	13.6277	0.573199
-30.16	26.46	23.9605	8.61351	4.82028	13.836	0.585002
-158	22.75	26.2919	9.56161	6.08824	16.2149	0.702893
110	-30.5	20.4407	7.74301	3.10012	11.0692	0.403886
-78.03	32.93	20.5542	7.75834	3.14617	11.1351	0.40907
-60.98	41.27	20.6636	7.77396	3.19133	11.2004	0.414132
-158	22.75	25.8119	9.34913	5.8342	15.7114	0.680612
-20.54	12.76	25.1429	9.06624	5.47061	15.0165	0.647425
-24.8	3.4	29.7644	11.1863	7.47245	19.5514	0.792953
-26.21	24.89	27.5954	10.1663	6.72528	17.5667	0.754139
-59.22	41.42	20.7509	7.78701	3.22787	11.2536	0.418209
-175.67	-19.99	24.8683	8.95533	5.31964	14.7357	0.63326
-69.02	40.58	21.0307	7.83241	3.34804	11.431	0.431529
-3.19	-20.44	19.1524	7.63194	2.63641	10.4472	0.350096
-95.99	-12.99	26.4771	9.64536	6.18405	16.4092	0.711068
-37.05	35.75	18.237	7.62276	2.37797	10.1509	0.318277
165	-19.5	28.1852	10.4469	6.97606	18.1527	0.771469
-158	22.75	23.8519	8.57542	4.76103	13.7321	0.579144
174.27	-20.75	27.8412	10.2831	6.83326	17.8138	0.761878
-158	22.75	24.8519	8.94881	5.31061	14.7191	0.632405
110	-27.5	21.6084	7.94299	3.60986	11.8292	0.460077
-8.77	42.36	18.4931	7.61958	2.44405	10.2214	0.326599
-158	22.75	23.8519	8.57542	4.76103	13.7321	0.579144
-47.69	40.95	21.2321	7.86839	3.43727	11.565	0.441328
-34.9	22.23	26.0566	9.45654	5.9646	15.9678	0.692152
-158	22.75	26.1419	9.49445	6.00966	16.0574	0.69609
-158	22.75	23.6519	8.50691	4.65239	13.543	0.568331
-45.28	-25.77	26.2587	9.54669	6.07092	16.18	0.701401
-158	22.75	25.4419	9.19059	5.63412	15.3256	0.662522
172.12	-21.37	24.8679	8.95516	5.3194	14.7353	0.633237
-47.5	-27.6	23.3573	8.41004	4.4938	13.2704	0.552389
-158	22.75	23.5319	8.46686	4.58756	13.431	0.561837
-22.87	32.68	23.4335	8.43463	4.53463	13.3402	0.556512
-78.15	32.91	21.1842	7.85958	3.41583	11.5326	0.438979
-8.77	42.36	17.9631	7.63102	2.31271	10.086	0.30989
-158	22.75	27.1719	9.96661	6.52905	17.1334	0.739238
-16.08	5.86	17.1613	7.68328	2.15433	9.95854	0.28849
-21.22	17.79	26.0569	9.45668	5.96477	15.9682	0.692167
-158	22.75	26.0819	9.46778	5.97801	15.9944	0.693327
-20	47.01	15.7203	7.87506	1.99166	9.95543	0.26216
110	-14	28.0506	10.3828	6.92143	18.0212	0.767898
-29.12	-20.32	27.989	10.3534	6.89588	17.9605	0.766184
-75.3	17.75	20.7368	7.78488	3.22196	11.2449	0.417551
165	-19.5	28.2252	10.4659	6.99198	18.1915	0.772484
-158	22.75	27.1719	9.96661	6.52905	17.1334	0.739238
-14.05	43.92	20.9128	7.81263	3.29686	11.355	0.425874
-25	-13.93	24.2701	8.72555	4.99008	14.1372	0.60164
-34.83	-31.16	22.3766	8.12443	3.98354	12.4216	0.499828
-158	22.75	25.8319	9.35784	5.84493	15.7324	0.681568
-158	22.75	26.3119	9.57061	6.09865	16.2359	0.703788
-34.84	-31.37	20.7066	7.78033	3.20928	11.2265	0.416137
-158	22.75	24.5419	8.82785	5.13973	14.4066	0.616112
-8.77	42.36	18.6331	7.61972	2.48224	10.2641	0.331342
-144.5	-16.25	21.0305	7.83237	3.34793	11.4308	0.431517
-20	39.9	17.1656	7.68288	2.15506	9.95898	0.288593
-115.13	-5.55	22.1125	8.05771	3.85207	12.2102	0.485969
-158	22.75	26.3019	9.5661	6.09345	16.2254	0.70334
-158	22.75	23.9319	8.60343	4.80468	13.8086	0.583462
-158	22.75	23.9219	8.59991	4.79922	13.799	0.582923
-158	22.75	23.9419	8.60696	4.81014	13.8182	0.584001
-25	-13.93	24.2801	8.72925	4.99558	14.147	0.602175
-158	22.75	25.0819	9.04134	5.43715	14.9539	0.644304
0.6	-8.62	21.4426	7.90896	3.53293	11.7106	0.451751
-114.88	-5.46	21.6225	7.94597	3.61646	11.8394	0.460789
164.59	-19.22	28.7211	10.7016	7.17644	18.6603	0.783213
-29.94	65.88	2.59763	8.81811	2.14083	10.9601	0.27477
172.53	-32.32	19.5973	7.65723	2.78382	10.6353	0.367556
-158	22.75	26.4719	9.64301	6.18138	16.4037	0.710843
-158	22.75	27.2119	9.98538	6.54809	17.1746	0.740726
-158	22.75	24.0719	8.65326	4.88127	13.9436	0.591004
-158	22.75	25.9219	9.39719	5.89305	15.8266	0.685845
-24.8	3.4	29.1344	10.8962	7.30995	19.0308	0.789302
-158	22.75	23.6519	8.50691	4.65239	13.543	0.568331
-158	22.75	24.3719	8.76344	5.04608	14.2375	0.607077
-109.35	-3.48	21.2246	7.867	3.4339	11.5599	0.440958
-158	22.75	25.2819	9.12362	5.5468	15.1598	0.654492
-177.58	-33	19.8545	7.67813	2.8753	10.757	0.378205
-158	22.75	25.5419	9.23295	5.68848	15.4296	0.66748
-158	22.75	25.6619	9.28427	5.75345	15.5546	0.673364
-124.45	-8.86	21.5527	7.93136	3.58386	11.789	0.457269
-21.22	17.79	26.0569	9.45668	5.96477	15.9682	0.692167
-158	22.75	23.9519	8.61049	4.8156	13.8278	0.584541
-158	22.75	27.5819	10.16	6.71924	17.553	0.753696
-158	22.75	23.4919	8.45369	4.56602	13.394	0.559672
176.75	-35.87	19.4062	7.64468	2.71881	10.551	0.359905
-158	22.75	26.0419	9.45006	5.95685	15.9525	0.691472
-30	57.86	13.8024	8.29101	2.00301	10.3504	0.250863
-129.28	-10.6	21.2153	7.86529	3.42976	11.5536	0.440505
110	-26	22.6178	8.18921	4.10601	12.6213	0.51262
174.27	-20.75	26.4812	9.64721	6.18613	16.4134	0.711245
-158	22.75	26.0419	9.45006	5.95685	15.9525	0.691472
-158	22.75	22.9119	8.2731	4.2582	12.873	0.52836
-178.32	-5	32.203	12.1469	7.47856	20.8207	0.725141
-143.3	-15.73	20.9841	7.82448	3.32771	11.4007	0.429286
-16.08	5.86	27.6213	10.1786	6.73687	17.5929	0.754987
-158	22.75	23.1919	8.35782	4.40566	13.1207	0.543448
-158	22.75	25.1019	9.04949	5.44813	14.9744	0.64533
-29	-13.05	28.2747	10.4895	7.01148	18.2393	0.773711
-158	22.75	25.8819	9.37967	5.87169	15.7847	0.68395
-158	22.75	22.2219	8.08481	3.90619	12.2968	0.49169
-29.25	-24.44	26.488	9.65034	6.18966	16.4207	0.711543
16.19	-28.93	24.0479	8.64464	4.86811	13.9204	0.589712
-25	-24.88	24.0334	8.63944	4.86015	13.9063	0.588929
-33.31	-15.17	28.3539	10.5273	7.04222	18.3155	0.775606
-25	-13.93	27.1101	9.93768	6.49944	17.0695	0.736911
-158	22.75	25.3119	9.1361	5.5632	15.1909	0.656006
-26.4	-0.19	27.3281	10.04	6.60281	17.2941	0.744952
-158	22.75	26.0019	9.43238	5.93563	15.9105	0.689606
-22.94	7.58	23.2285	8.36924	4.42511	13.1536	0.545425
-172.81	-19.5	27.8599	10.292	6.84127	17.8324	0.762437
-75.91	16.66	20.6602	7.77346	3.18992	11.1983	0.413973
-34.9	22.23	26.0766	9.4654	5.97518	15.9888	0.693079
-158	22.75	22.5519	8.17116	4.07233	12.5661	0.509114
-8.1	48.75	12.6756	8.59427	2.11264	10.7489	0.255592
110	-36.5	15.4449	7.92467	1.97796	9.986	0.258907
-158	22.75	26.4819	9.64755	6.18652	16.4142	0.711278
110	-18.5	23.6901	8.51984	4.6731	13.5789	0.570399
-158	22.75	24.9419	8.98474	5.36016	14.8107	0.637083
-76.56	15.48	20.836	7.80024	3.26392	11.3064	0.42222
-116.53	-6.05	21.8829	8.0034	3.7403	12.0329	0.474079
-158	22.75	25.9519	9.41036	5.90904	15.8581	0.68726
170	-22	27.4599	10.1022	6.66386	17.429	0.749582
-158	22.75	23.2219	8.36718	4.42159	13.1476	0.545068
110	-17	25.5812	9.24969	5.70978	15.4705	0.669413
-55	-43.58	10.5342	9.20693	2.45893	11.6884	0.281697
-130.95	-11.15	21.1785	7.85855	3.41331	11.5288	0.438704
-54.73	-43.43	12.2742	8.70826	2.16633	10.9122	0.259003
-2.63	-5.86	22.8852	8.26526	4.24426	12.8498	0.526925
-158	22.75	23.9719	8.61756	4.82653	13.847	0.585619
110	-36.5	15.4549	7.92281	1.97836	9.98473	0.259016
-158	22.75	26.4719	9.64301	6.18138	16.4037	0.710843
-158	22.75	25.8519	9.36656	5.85564	15.7533	0.682523
-158	22.75	24.8719	8.95677	5.32162	14.7394	0.633447
-158	22.75	23.8719	8.58239	4.77194	13.7512	0.580224
-158	22.75	25.0119	9.01294	5.39868	14.8822	0.640702
-158	22.75	27.9419	10.331	6.87613	17.914	0.764841
-158	22.75	26.2919	9.56161	6.08824	16.2149	0.702893
-75.28	17.78	21.2668	7.87488	3.45289	11.5886	0.443036
-158	22.75	27.2419	9.99947	6.56231	17.2055	0.74183
-16.85	43.69	16.3899	7.77115	2.04798	9.92189	0.272444
174.27	-20.75	28.3312	10.5164	7.03344	18.2937	0.77507
-158	22.75	24.3519	8.75595	5.03507	14.2178	0.60601
170	-22	28.2699	10.4873	7.00962	18.2348	0.773595
-158	22.75	26.6019	9.70231	6.24781	16.54	0.716432
-158	22.75	24.5919	8.84706	5.1673	14.4567	0.618758
-158	22.75	26.1019	9.47666	5.98858	16.0154	0.694251
-158	22.75	24.0819	8.65686	4.88675	13.9533	0.591542
110	-36.5	15.4549	7.92281	1.97836	9.98473	0.259016
-158	22.75	25.0819	9.04134	5.43715	14.9539	0.644304
-158	22.75	24.8719	8.95677	5.32162	14.7394	0.633447
-31.4	-27.63	24.261	8.72217	4.98505	14.1282	0.601151
-124.37	-8.83	21.6192	7.94528	3.61493	11.837	0.460624
-158	22.75	25.4819	9.20749	5.65589	15.3671	0.664511
-158	22.75	26.6419	9.72064	6.26809	16.5819	0.718124
-158	22.75	24.0319	8.63892	4.85936	13.9049	0.588851
-158	22.75	25.6719	9.28857	5.75885	15.5651	0.673851
-46.12	-32.8	18.2745	7.62202	2.38733	10.1606	0.319466
-179.26	-34.73	20.0914	7.70147	2.96345	10.8774	0.388353
-158	22.75	25.3919	9.16955	5.60688	15.2737	0.660025
-158	22.75	24.0519	8.64608	4.87031	13.9243	0.589928
-158	22.75	25.6619	9.28427	5.75345	15.5546	0.673364
-25.72	30.29	23.3235	8.39922	4.4757	13.2395	0.550557
-158	22.75	24.0219	8.63535	4.85389	13.8952	0.588313
178.64	-20.97	25.5834	9.25065	5.711	15.4728	0.669524
-119.39	-7.07	21.6259	7.94669	3.61806	11.8419	0.460961
168	-20	27.5744	10.1564	6.71586	17.5454	0.753447
-158	22.75	26.4719	9.64301	6.18138	16.4037	0.710843
-178.32	-5	32.253	12.1624	7.46583	20.8305	0.722105
-52.68	41.95	20.5224	7.75396	3.1332	11.1165	0.407612
-77.22	14.33	20.7527	7.78729	3.22863	11.2547	0.418295
-158	22.75	24.1719	8.68948	4.93612	14.0409	0.596377
-158	22.75	24.8219	8.93691	5.29408	14.6886	0.630841
110	-29	20.4527	7.74459	3.10493	11.0761	0.404429
-21.61	44.46	22.566	8.17499	4.07951	12.5779	0.509861
-158	22.75	27.8019	10.2644	6.81633	17.7746	0.76069
-30	34.07	19.8992	7.68223	2.89162	10.7791	0.380093
-133.41	-12.02	21.0836	7.84159	3.37124	11.4656	0.434084
-158	22.75	26.0419	9.45006	5.95685	15.9525	0.691472
-158	22.75	25.4819	9.20749	5.65589	15.3671	0.664511
-158	22.75	26.2919	9.56161	6.08824	16.2149	0.702893
-158	22.75	23.7719	8.54776	4.71749	13.6561	0.574821
-108.12	-3.05	21.2517	7.87205	3.44608	11.5783	0.442291
-158	22.75	24.1219	8.67131	4.90868	13.9922	0.593692
176.38	-20.71	24.5282	8.82259	5.13216	14.3929	0.615384
-108.86	-3.32	21.8042	7.98557	3.70253	11.9736	0.47004
18.01	-33.62	17.7321	7.64183	2.26208	10.0398	0.303239
-158	22.75	27.9719	10.3453	6.88873	17.9436	0.7657
-25	-13.93	27.1001	9.933	6.49462	17.0591	0.73653
-158	22.75	25.4619	9.19903	5.64501	15.3464	0.663517
-158	22.75	22.7519	8.22681	4.17504	12.735	0.519781
-80.04	9.85	28.6773	10.6809	7.16118	18.62	0.782411
-158	22.75	24.1619	8.68584	4.93063	14.0312	0.595841
-16.89	43.79	16.4199	7.76708	2.05128	9.92178	0.272984
-158	22.75	26.7119	9.7528	6.3034	16.6551	0.721055
-158	22.75	26.6219	9.71147	6.25796	16.5609	0.71728
-158	22.75	23.9919	8.62466	4.83747	13.8663	0.586697
-158	22.75	23.4319	8.4341	4.53377	13.3387	0.556425
-76.78	33.83	21.0305	7.83238	3.34796	11.4308	0.431519
-158	22.75	24.7619	8.91324	5.26101	14.6278	0.627703
-141.22	-14.85	20.8486	7.80226	3.26932	11.3143	0.42282
170	-22	26.8999	9.83972	6.39704	16.8513	0.72872
-79.07	10.95	21.011	7.82903	3.33941	11.4181	0.430577
-55	-43.58	10.5242	9.20971	2.46078	11.693	0.281855
-30	49.44	18.1492	7.62487	2.35644	10.1289	0.31553
178.64	-20.97	26.3034	9.56679	6.09424	16.227	0.703409
-158	22.75	26.4819	9.64755	6.18652	16.4142	0.711278
-158	22.75	26.1019	9.47666	5.98858	16.0154	0.694251
-8.77	42.36	17.9131	7.63307	2.30141	10.0753	0.308417
-158	22.75	26.2719	9.55262	6.07781	16.1939	0.701995
-129.4	-23.28	23.361	8.41123	4.49578	13.2738	0.552589
-74.91	35.83	21.3145	7.88392	3.47444	11.6213	0.445388
-25.99	-28.79	21.7504	7.97363	3.6769	11.9335	0.467291
-158	22.75	25.8719	9.37529	5.86634	15.7742	0.683475
-15.41	44.96	22.6431	8.19621	4.11896	12.6426	0.513966
-158	22.75	24.6919	8.88582	5.22243	14.5572	0.624029
-158	22.75	24.7519	8.90931	5.2555	14.6177	0.627179
-78.7	32.56	21.5404	7.92881	3.57813	11.7801	0.456649
-9.7	48.45	28.5538	10.6223	7.11698	18.5048	0.77999
-24.8	3.4	29.8744	11.2359	7.49521	19.636	0.792831
-22.94	7.58	21.9585	8.02091	3.77685	12.0906	0.477979
-158	22.75	25.6419	9.27568	5.74265	15.5338	0.672388
-113.71	-5.05	21.5724	7.93545	3.59304	11.8031	0.458262
-149.98	-17.75	20.1625	7.70924	2.99065	10.9151	0.391463
-39.63	43.02	22.434	8.13953	4.0125	12.4686	0.502863
-8.79	42.23	18.2631	7.62224	2.38447	10.1576	0.319103
-158	22.75	26.4919	9.6521	6.19165	16.4247	0.711711
-80.03	31.2	21.3455	7.88987	3.4885	11.6427	0.446921
-158	22.75	23.8319	8.56847	4.75014	13.713	0.578064
-24.99	-16.59	26.4091	9.61449	6.14901	16.3378	0.708094
178.21	-26.99	24.2916	8.73349	5.00188	14.1583	0.602788
-105.81	-2.58	21.2147	7.86518	3.42948	11.5532	0.440475
-158	22.75	24.3519	8.75595	5.03507	14.2178	0.60601
-158	22.75	25.6319	9.27139	5.73724	15.5233	0.6719
-117.63	-6.44	21.8513	7.99619	3.72509	12.009	0.472454
168	-20	27.9244	10.3227	6.86873	17.8966	0.764335
-158	22.75	25.9119	9.3928	5.88771	15.8161	0.685372
-144.4	-16.2	21.0205	7.83065	3.34356	11.4243	0.431035
-25	-13.93	24.2801	8.72925	4.99558	14.147	0.602175
-158	22.75	26.7319	9.76201	6.31345	16.676	0.721885
-34.84	-31.37	22.2566	8.09357	3.92346	12.3246	0.493511
-29.94	65.88	4.21763	9.60589	2.8163	12.4242	0.328887
-30.16	26.46	24.4305	8.78546	5.07832	14.2956	0.610196
-158	22.75	23.7619	8.54432	4.71206	13.6466	0.574281
-158	22.75	25.6319	9.27139	5.73724	15.5233	0.6719
-100.63	-16.96	23.7087	8.52613	4.68315	13.5963	0.571401
-158	22.75	23.8019	8.55809	4.73381	13.6845	0.576443
-158	22.75	25.4819	9.20749	5.65589	15.3671	0.664511
172.12	-21.37	24.8679	8.95516	5.3194	14.7353	0.633237
-158	22.75	25.2219	9.09876	5.51395	15.0979	0.651453
-74.91	35.1	20.3402	7.7302	3.06002	11.0123	0.399352
-158	22.75	25.6619	9.28427	5.75345	15.5546	0.673364
-158	22.75	23.5119	8.46026	4.57678	13.4125	0.560754
-158	22.75	24.1919	8.69679	4.9471	14.0605	0.59745
-12.77	3.07	25.7314	9.31424	5.79095	15.6273	0.676739
-158	22.75	25.5619	9.24147	5.69933	15.4504	0.668465
-45.15	-26.03	25.8123	9.34931	5.83442	15.7119	0.680631
-176.33	-32.37	19.62	7.65888	2.79171	10.6457	0.368479
-29.3	27.21	24.7194	8.89655	5.23757	14.5849	0.625472
-140.28	-8.91	28.2849	10.4944	7.01549	18.2492	0.773961
-158	22.75	25.0819	9.04134	5.43715	14.9539	0.644304
-46.12	-32.8	18.2745	7.62202	2.38733	10.1606	0.319466
-158	22.75	25.4519	9.19481	5.63957	15.336	0.663019
-26.32	44.02	22.3478	8.11693	3.96905	12.3981	0.498307
-8.44	43.42	18.0701	7.6272	2.33754	10.11	0.313103
-158	22.75	23.7719	8.54776	4.71749	13.6561	0.574821
-158	22.75	24.8619	8.95279	5.31611	14.7292	0.632926
-30	57.86	13.8224	8.28594	2.00169	10.3442	0.250849
-53.3	-39.35	18.7065	7.62033	2.50285	10.2876	0.333885
-158	22.75	27.7219	10.2264	6.78146	17.6944	0.758212
-20.54	12.76	30.5729	11.5402	7.59596	20.1219	0.786246
-158	22.75	23.7719	8.54776	4.71749	13.6561	0.574821
-52.19	-37.81	15.6901	7.88031	1.98989	9.95831	0.261776
-158	22.75	24.2319	8.71146	4.96907	14.0996	0.599594
-158	22.75	25.0819	9.04134	5.43715	14.9539	0.644304
-158	22.75	25.6819	9.29287	5.76425	15.5755	0.674337
-21.88	26.28	24.1239	8.67203	4.90978	13.9942	0.5938
-158	22.75	25.8819	9.37967	5.87169	15.7847	0.68395
-77.8	13.27	21.1027	7.84495	3.37967	11.4782	0.435011
-158	22.75	26.7619	9.77584	6.32848	16.7073	0.723123
-158	22.75	23.7519	8.54089	4.70662	13.6371	0.57374
-25	-13.93	27.1101	9.93768	6.49944	17.0695	0.736911
-158	22.75	25.5119	9.2202	5.6722	15.3983	0.665997
168	-20	27.9144	10.3179	6.8645	17.8867	0.764044
-30.16	26.46	24.7705	8.9166	5.26573	14.6365	0.628151
-16.08	5.86	16.9113	7.70785	2.11494	9.93759	0.282797
-158	22.75	24.5419	8.82785	5.13973	14.4066	0.616112
-158	22.75	26.1319	9.49	6.0044	16.0469	0.695631
-158	22.75	25.4719	9.20326	5.65045	15.3567	0.664014
-158	22.75	24.1619	8.68584	4.93063	14.0312	0.595841
-21.01	13.8	21.5888	7.93887	3.60068	11.815	0.459086
-55.6	-47.59	6.87918	9.91336	3.0222	12.9416	0.337059
-12.63	-4.47	24.0409	8.64214	4.86429	13.9136	0.589336
-36.6	24.87	28.6617	10.6734	7.15566	18.6054	0.782116
-158	22.75	25.3819	9.16536	5.60142	15.2633	0.659524
-158	22.75	24.5419	8.82785	5.13973	14.4066	0.616112
-33.31	-15.17	28.3439	10.5225	7.03838	18.3059	0.775372
-158	22.75	24.5219	8.8202	5.12871	14.3866	0.615053
-158	22.75	25.9319	9.40157	5.89838	15.8371	0.686318
-30	50.84	17.1937	7.68037	2.1598	9.96191	0.289264
-9.7	48.45	15.8938	7.84581	2.00309	9.94111	0.2645
-178.51	-20.45	24.8775	8.95898	5.32469	14.7451	0.633737
-158	22.75	23.8319	8.56847	4.75014	13.713	0.578064
-26.34	24.63	27.3954	10.0717	6.63411	17.3631	0.747338
-158	22.75	26.8219	9.80356	6.3584	16.77	0.725576
-12.63	-4.47	23.6509	8.50657	4.65184	13.542	0.568277
-158	22.75	27.2919	10.023	6.58587	17.257	0.743652
-20	39.9	17.1756	7.68198	2.15674	9.96001	0.288831
-158	22.75	24.4119	8.77847	5.0681	14.2772	0.609209
-43.65	41.19	21.6803	7.95834	3.64368	11.8817	0.463721
-46.01	-24.36	18.6829	7.62009	2.49616	10.2799	0.333061
-158	22.75	24.2619	8.72251	4.98556	14.1291	0.601201
-28.21	-3.92	28.242	10.474	6.99864	18.2078	0.772905
39.56	-21.38	25.5165	9.22216	5.67471	15.4031	0.666226
-8.36	43.37	21.236	7.86911	3.43902	11.5676	0.441519
-158	22.75	23.1019	8.33008	4.35801	13.0403	0.53859
110	-24.5	22.9338	8.27956	4.26964	12.8921	0.529537
-158	22.75	26.4119	9.61578	6.15048	16.3408	0.70822
-158	22.75	26.3219	9.57511	6.10385	16.2464	0.704234
-158	22.75	25.8819	9.37967	5.87169	15.7847	0.68395
-158	22.75	26.3219	9.57511	6.10385	16.2464	0.704234
-158	22.75	23.0519	8.31488	4.33164	12.9959	0.535894
-158	22.75	23.4419	8.43735	4.53914	13.3479	0.556966
-77.8	13.23	21.7327	7.96973	3.66848	11.9203	0.466387
-158	22.75	23.7819	8.5512	4.72293	13.6655	0.575362
-158	22.75	25.5819	9.25	5.71017	15.4712	0.669449
-158	22.75	26.2019	9.52124	6.04119	16.1204	0.69883
-158	22.75	26.3919	9.60672	6.14015	16.3198	0.707339
-158	22.75	25.9619	9.41476	5.91436	15.8686	0.687731
-158	22.75	25.9619	9.41476	5.91436	15.8686	0.687731
-158	22.75	23.2219	8.36718	4.42159	13.1476	0.545068
-158	22.75	24.8519	8.94881	5.31061	14.7191	0.632405
-110.7	-3.98	21.7259	7.96825	3.66526	11.9153	0.466042
0.6	-8.62	19.5326	7.65269	2.76154	10.6062	0.364941
-158	22.75	24.0719	8.65326	4.88127	13.9436	0.591004
-158	22.75	26.1619	9.50337	6.02019	16.0784	0.697006
-178.37	-33.42	19.8339	7.67629	2.8678	10.7469	0.377338
-24.99	-16.59	26.4391	9.62809	6.16449	16.3693	0.70941
-20	24.51	17.3	7.6713	2.17825	9.97399	0.291853
-158	22.75	26.1619	9.50337	6.02019	16.0784	0.697006
-158	22.75	24.7519	8.90931	5.2555	14.6177	0.627179
-37.88	43.15	22.2636	8.09534	3.92694	12.3302	0.493877
164.59	-19.22	27.1411	9.95218	6.51431	17.1015	0.738082
170	-22	27.3999	10.0739	6.63623	17.3677	0.747498
-158	22.75	25.9219	9.39719	5.89305	15.8266	0.685845
-21	21.95	26.5924	9.69794	6.24295	16.53	0.716026
-30	57.86	13.8324	8.2834	2.00103	10.3412	0.250843
-158	22.75	25.9619	9.41476	5.91436	15.8686	0.687731
16.45	-29.52	25.0401	9.02434	5.41415	14.911	0.642153
170	-22	26.0299	9.44476	5.9505	15.9399	0.690915
-24.02	5.17	29.4713	11.0525	7.40342	19.3164	0.792148
-79.28	10.51	21.1917	7.86094	3.41917	11.5376	0.439346
-115.13	-5.58	21.8325	7.99192	3.71605	11.9948	0.471487
-17.51	36.61	31.0615	11.7398	7.61686	20.4021	0.775137
-30	57.86	13.7724	8.29865	2.00505	10.3596	0.250888
-158	22.75	23.4519	8.44061	4.54451	13.3571	0.557507
-158	22.75	23.4519	8.44061	4.54451	13.3571	0.557507
-158	22.75	25.3319	9.14444	5.57413	15.2116	0.657014
-158	22.75	26.2019	9.52124	6.04119	16.1204	0.69883
-158	22.75	25.3219	9.14026	5.56866	15.2012	0.65651
-158	22.75	25.4719	9.20326	5.65045	15.3567	0.664014
-158	22.75	23.5319	8.46686	4.58756	13.431	0.561837
-158	22.75	25.2519	9.11117	5.53038	15.1289	0.652974
-158	22.75	27.1519	9.95724	6.51949	17.1127	0.738489
-158	22.75	26.1619	9.50337	6.02019	16.0784	0.697006
-158	22.75	25.6819	9.29287	5.76425	15.5755	0.674337
-158	22.75	26.6219	9.71147	6.25796	16.5609	0.71728
-158	22.75	17.3619	7.66635	2.18939	9.98177	0.293398
-158	22.75	25.2819	9.12362	5.5468	15.1598	0.654492
-17.43	41.08	15.6268	7.89146	1.9864	9.96473	0.260993
110	-29	20.9027	7.81096	3.29247	11.3485	0.425388
-21.88	26.28	24.0239	8.63607	4.85498	13.8972	0.588421
-158	22.75	23.6919	8.52044	4.67406	13.5805	0.570495
39.88	18.4	29.8426	11.2216	7.48879	19.6116	0.792891
-8.77	42.36	17.9131	7.63307	2.30141	10.0753	0.308417
-179.26	-34.73	21.3514	7.89101	3.49117	11.6468	0.447212
-12.77	3.07	21.8514	7.99622	3.72516	12.0091	0.472462
-83.93	5.6	19.6475	7.66094	2.80131	10.6583	0.369602
-158	22.75	23.8619	8.5789	4.76648	13.7416	0.579684
-20	24.51	18.81	7.6218	2.53256	10.3221	0.337529
-158	22.75	24.3819	8.76719	5.05159	14.2474	0.60761
-158	22.75	26.1619	9.50337	6.02019	16.0784	0.697006
-20	39.9	17.1656	7.68288	2.15506	9.95898	0.288593
-9.7	48.45	28.5438	10.6175	7.11334	18.4954	0.779784
-158	22.75	22.8519	8.25556	4.22692	12.821	0.525139
-21.88	26.28	24.0239	8.63607	4.85498	13.8972	0.588421
164.65	-19.22	28.4811	10.5877	7.09026	18.4364	0.778462
-75.95	16.6	21.3302	7.88692	3.48155	11.6321	0.446163
-158	22.75	25.7019	9.30149	5.77504	15.5964	0.675309
-158	22.75	23.2119	8.36405	4.41628	13.1386	0.544528
-19.49	9.71	29.6192	11.1203	7.43973	19.4366	0.792755
-158	22.75	23.6519	8.50691	4.65239	13.543	0.568331
165	-19.5	27.0352	9.90266	6.46322	16.9919	0.734038
-78.15	12.65	21.7637	7.97656	3.68321	11.9433	0.467969
-158	22.75	23.1419	8.34235	4.37916	13.0759	0.540748
-158	22.75	25.8919	9.38404	5.87703	15.7952	0.684425
-158	22.75	26.8619	9.82208	6.37825	16.8117	0.727194
-158	22.75	24.3819	8.76719	5.05159	14.2474	0.60761
178.32	22	26.7576	9.77385	6.32632	16.7028	0.722945
168	-20	27.5744	10.1564	6.71586	17.5454	0.753447
-12.63	-4.47	23.1909	8.35751	4.40513	13.1198	0.543393
179	16	27.495	10.1188	6.67989	17.4648	0.750781
-158	22.75	25.8219	9.35348	5.83957	15.7219	0.68109
-21.88	26.28	24.0139	8.6325	4.84951	13.8875	0.587883
-158	22.75	24.5119	8.81638	5.1232	14.3767	0.614523
-158	22.75	25.2819	9.12362	5.5468	15.1598	0.654492
-158	22.75	26.4519	9.63392	6.1711	16.3828	0.709972
-24.99	-16.59	26.4391	9.62809	6.16449	16.3693	0.70941
-75.3	17.75	20.7468	7.7864	3.22616	11.2511	0.41802
-123.46	-8.67	21.5475	7.93028	3.58143	11.7852	0.457007
-158	22.75	24.0719	8.65326	4.88127	13.9436	0.591004
-158	22.75	23.8419	8.57195	4.75559	13.7226	0.578604
-172.81	-19.5	27.9199	10.3205	6.86681	17.8921	0.764203
178.32	22	26.5576	9.68205	6.22525	16.4936	0.714542
-158	22.75	24.4119	8.77847	5.0681	14.2772	0.609209
-173.63	-30.57	19.0559	7.62826	2.6063	10.4103	0.346477
-158	22.75	24.6019	8.85091	5.17281	14.4667	0.619286
-21.3	44.5	22.3271	8.1116	3.95869	12.3814	0.497219
-55.6	-47.59	6.87918	9.91336	3.0222	12.9416	0.337059
-29.75	43.7	22.1353	8.06331	3.86334	12.2282	0.487162
-158	22.75	24.1819	8.69313	4.94161	14.0507	0.596914
-158	22.75	24.1919	8.69679	4.9471	14.0605	0.59745
-79.53	30.56	21.2357	7.86906	3.43888	11.5674	0.441504
-158	22.75	24.5919	8.84706	5.1673	14.4567	0.618758
-25.78	1.29	27.5551	10.1472	6.70714	17.5258	0.752804
-158	22.75	25.7819	9.3361	5.8181	15.68	0.679172
-21.47	21.76	23.2124	8.36419	4.41652	13.139	0.544552
-158	22.75	23.6319	8.50018	4.64156	13.5242	0.567249
110	-29	20.9027	7.81096	3.29247	11.3485	0.425388
-18.21	47.37	18.0697	7.62722	2.33743	10.1099	0.31309
-30	36.78	20.2205	7.71583	3.01304	10.9463	0.394016
-8.36	43.37	17.826	7.63702	2.28218	10.0576	0.305896
-22.28	9.05	30.2755	11.4131	7.56268	19.9264	0.790321
-159	31.52	27.4181	10.0824	6.6446	17.3863	0.748131
164.65	-19.22	28.5511	10.621	7.11602	18.5023	0.779935
-56.55	40.8	20.8014	7.7948	3.24921	11.2848	0.420585
-158	22.75	27.1419	9.95256	6.5147	17.1024	0.738113
-22.94	7.58	28.4485	10.5722	7.07811	18.4056	0.777752
-158	22.75	23.7819	8.5512	4.72293	13.6655	0.575362
-29.94	65.88	2.99763	9.06511	2.3582	11.4246	0.292774
-158	22.75	26.8619	9.82208	6.37825	16.8117	0.727194
-158	22.75	26.5919	9.69773	6.24272	16.5295	0.716007
-158	22.75	24.0619	8.64967	4.87579	13.9339	0.590466
-77.24	14.03	21.5969	7.94057	3.60447	11.8208	0.459496
-55.6	-47.59	6.88918	9.91278	3.02152	12.9404	0.336967
-20	47.01	15.6803	7.88203	1.98933	9.95927	0.261653
47.48	-11.6	28.0408	10.3781	6.91737	18.0116	0.767627
-139.6	25.77	20.9572	7.81996	3.31602	11.3833	0.427994
-116.35	-5.98	22.0067	8.03225	3.80026	12.1277	0.48047
-158	22.75	22.6119	8.18759	4.10299	12.6163	0.512306
-29	25.65	25.1888	9.08511	5.49581	15.0638	0.64977
-52.28	41.98	22.033	8.03853	3.81313	12.1482	0.481838
-17.43	41.08	30.9368	11.6901	7.61571	20.3358	0.778514
-158	22.75	25.3419	9.14861	5.57959	15.2219	0.657517
-158	22.75	23.2919	8.3892	4.45886	13.2109	0.548851
-158	22.75	25.0519	9.02914	5.42067	14.9231	0.642763
-158	22.75	26.8519	9.81745	6.3733	16.8013	0.726791
-158	22.75	26.6019	9.70231	6.24781	16.54	0.716432
-158	22.75	25.2719	9.11946	5.54132	15.1495	0.653987
-158	22.75	24.7119	8.89363	5.23345	14.5773	0.62508
-6.17	-2.81	22.4832	8.15261	4.03739	12.5091	0.505467
-158	22.75	24.1519	8.6822	4.92514	14.0214	0.595304
-12.72	-1.36	19.4311	7.64617	2.72713	10.5617	0.360888
-26.33	24.67	27.4554	10.1001	6.66176	17.4244	0.749424
164.65	-19.22	28.5311	10.6115	7.10871	18.4836	0.779522
-158	22.75	23.9419	8.60696	4.81014	13.8182	0.584001
-20.54	12.76	21.6729	7.95673	3.64017	11.8762	0.463343
-158	22.75	25.0619	9.0332	5.42616	14.9334	0.643277
-158	22.75	24.8319	8.94087	5.29959	14.6988	0.631362
-124.64	-8.93	21.4727	7.915	3.54678	11.7319	0.453254
-158	22.75	25.5419	9.23295	5.68848	15.4296	0.66748
18.01	-33.62	12.1121	8.7548	2.18986	10.9806	0.260607
-158	22.75	23.2319	8.37031	4.42691	13.1566	0.545608
-27.34	-2.02	27.5848	10.1613	6.72052	17.5559	0.75379
-20.01	39.87	18.9756	7.6257	2.58173	10.3805	0.343509
-13.98	48.06	14.962	8.02056	1.96683	10.062	0.254557
-14.3	-7.23	24.3383	8.75087	5.02758	14.2043	0.605284
47.46	-11.64	27.8408	10.2829	6.8331	17.8134	0.761867
-158	22.75	23.7819	8.5512	4.72293	13.6655	0.575362
-127.2	-9.83	21.4205	7.90455	3.52276	11.695	0.450647
-158	22.75	25.0019	9.0089	5.39318	14.872	0.640186
-158	22.75	26.4319	9.62484	6.1608	16.3618	0.709097
-158	22.75	23.7619	8.54432	4.71206	13.6466	0.574281
-158	22.75	25.6419	9.27568	5.74265	15.5338	0.672388
-158	22.75	26.7419	9.76662	6.31846	16.6864	0.722298
-158	22.75	25.7419	9.31876	5.79659	15.6382	0.677245
110	-29	20.9127	7.8126	3.29678	11.3548	0.425865
-158	22.75	24.2419	8.71514	4.97457	14.1095	0.60013
-158	22.75	23.7819	8.5512	4.72293	13.6655	0.575362
-158	22.75	25.6619	9.28427	5.75345	15.5546	0.673364
-158	22.75	23.8519	8.57542	4.76103	13.7321	0.579144
-148.89	25.02	22.2225	8.08496	3.90647	12.2973	0.491719
-10.64	47.96	18.4768	7.61966	2.4397	10.2167	0.326056
-30	38.48	22.9805	8.29342	4.2941	12.933	0.532048
-158	22.75	22.3919	8.12843	3.99124	12.4341	0.500635
-13.2	-1.37	21.7895	7.98229	3.69552	11.9626	0.469288
-158	22.75	22.4819	8.15226	4.03673	12.508	0.505398
-158	22.75	25.6019	9.25854	5.72101	15.4921	0.670431
66.42	-9.39	29.8567	11.2279	7.49166	19.6225	0.792867
-49.82	-35.65	18.7345	7.62065	2.51081	10.2968	0.334863
-158	22.75	26.5319	9.67033	6.21213	16.4667	0.713439
-148.89	25.02	22.2325	8.08747	3.91144	12.3053	0.492244
-158	22.75	23.4019	8.42439	4.51768	13.3112	0.554801
26.29	-35.19	21.9216	8.01231	3.75897	12.0624	0.476072
-30	34.07	23.6892	8.5195	4.67256	13.5779	0.570346
-151.81	-18.81	19.3637	7.64223	2.70468	10.533	0.358232
-158	22.75	21.4919	7.91889	3.55565	11.7455	0.454216
-17.44	5.98	28.2781	10.4912	7.01284	18.2427	0.773796
17.4	39.84	18.4288	7.61997	2.42701	10.2028	0.324468
-26.3	24.7	27.4754	10.1095	6.67092	17.4448	0.750111
-158	22.75	24.3219	8.74476	5.01856	14.1881	0.604409
-158	22.75	23.7219	8.53064	4.69033	13.6088	0.572118
179.82	-30.1	23.4389	8.43638	4.53754	13.3451	0.556804
-158	22.75	26.6219	9.71147	6.25796	16.5609	0.71728
-36.59	24.94	28.6417	10.664	7.14858	18.5869	0.781735
-158	22.75	24.5119	8.81638	5.1232	14.3767	0.614523
-9.7	48.45	28.5538	10.6223	7.11698	18.5048	0.77999
-48.88	42.27	21.896	8.00641	3.74661	12.0429	0.474754
-158	22.75	24.4119	8.77847	5.0681	14.2772	0.609209
-17.05	32.43	27.0157	9.89359	6.45377	16.9717	0.733284
-164.08	-25.8	17.4501	7.65971	2.20577	9.9938	0.295651
-40.08	42.98	21.8006	7.98477	3.70082	11.9709	0.469856
-158	22.75	24.0519	8.64608	4.87031	13.9243	0.589928
-125.68	-9.3	21.5119	7.92297	3.56492	11.7598	0.45522
-75.35	34.71	20.7102	7.78086	3.21076	11.2286	0.416302
-158	22.75	24.8419	8.94484	5.3051	14.7089	0.631884
-158	22.75	26.2419	9.53915	6.06214	16.1624	0.700642
-24.02	5.17	29.2213	10.9367	7.33544	19.106	0.790225
110	-24.5	22.5338	8.16624	4.0631	12.551	0.508151
-158	22.75	25.2919	9.12777	5.55226	15.1702	0.654997
-178	-15	27.2277	9.99279	6.55557	17.1909	0.741308
-158	22.75	24.5019	8.81257	5.11769	14.3667	0.613992
-158	22.75	26.4619	9.63846	6.17625	16.3933	0.710408
-158	22.75	26.7219	9.7574	6.30843	16.6655	0.72147
-28.21	-3.92	28.642	10.6641	7.14872	18.5872	0.781742
-177.07	-32.73	19.7702	7.67077	2.84482	10.7161	0.374672
-158	22.75	26.0319	9.44563	5.95155	15.942	0.691006
-148.89	25.02	22.2425	8.08999	3.91641	12.3133	0.492768
168	-20	25.6144	9.26388	5.72776	15.5051	0.671043
-51.99	40.88	21.5148	7.92355	3.56624	11.7618	0.455363
-158	22.75	25.5419	9.23295	5.68848	15.4296	0.66748
-139.6	25.77	20.9572	7.81996	3.31602	11.3833	0.427994
-55	-43.58	10.5542	9.20137	2.45521	11.6793	0.281381
-36.13	43.32	21.7997	7.98457	3.70039	11.9702	0.469811
164.65	-19.22	28.3011	10.5021	7.02179	18.2648	0.774352
-145.9	-16.76	20.9218	7.81409	3.30071	11.3607	0.4263
-148.89	25.02	22.2425	8.08999	3.91641	12.3133	0.492768
-158	22.75	24.3319	8.74848	5.02406	14.198	0.604943
-158	22.75	24.6019	8.85091	5.17281	14.4667	0.619286
-158	22.75	23.9919	8.62466	4.83747	13.8663	0.586697
-158	22.75	26.4719	9.64301	6.18138	16.4037	0.710843
-9.23	47.43	22.2946	8.10323	3.9424	12.3551	0.495505
-158	22.75	26.8219	9.80356	6.3584	16.77	0.725576
-158	22.75	24.8019	8.929	5.28306	14.6683	0.629796
-77.23	14.28	21.3627	7.8932	3.49633	11.6546	0.447773
-14.84	-8.02	24.2957	8.73501	5.00413	14.1623	0.603007
-76.7	15.27	20.936	7.81643	3.30684	11.3697	0.426978
-166.4	-27.07	17.8301	7.63682	2.28307	10.0584	0.306013
-158	22.75	25.3219	9.14026	5.56866	15.2012	0.65651
-16.08	5.86	25.4513	9.19453	5.63921	15.3353	0.662987
110	-33.5	18.26	7.6223	2.3837	10.1568	0.319005
-158	22.75	24.4219	8.78223	5.07361	14.2871	0.609741
-8.4	43.39	20.326	7.72843	3.05438	11.0043	0.398713
26.31	-35.25	21.9116	8.01	3.75414	12.0548	0.475557
-45.3	42.56	21.6675	7.95557	3.63763	11.8723	0.463069
-8.83	42.36	18.0531	7.62776	2.33353	10.1061	0.312586
167.98	-25.18	18.1617	7.62454	2.35946	10.1319	0.315917
-19.49	9.71	29.7192	11.1658	7.46257	19.516	0.792935
-9.7	48.45	16.4738	7.7599	2.05737	9.9219	0.27397
-158	22.75	26.5319	9.67033	6.21213	16.4667	0.713439
-158	22.75	25.3319	9.14444	5.57413	15.2116	0.657014
-20.54	12.76	30.5429	11.5276	7.59329	20.103	0.786746
-158	22.75	23.0119	8.30282	4.3106	12.9606	0.53374
-158	22.75	23.9219	8.59991	4.79922	13.799	0.582923
-22.28	9.05	24.4855	8.80631	5.10863	14.3503	0.61312
-158	22.75	25.4819	9.20749	5.65589	15.3671	0.664511
110	-35	17.814	7.6376	2.27958	10.0553	0.305553
-20.01	39.87	18.9856	7.62599	2.58476	10.3841	0.343877
-30	57.86	13.7624	8.3012	2.00574	10.3627	0.250897
-8.44	43.42	18.7701	7.62115	2.52101	10.3086	0.336115
-158	22.75	26.3319	9.57962	6.10905	16.2569	0.70468
-45.08	-26.18	25.5223	9.22462	5.67785	15.4092	0.666512
-8.44	43.42	17.6801	7.64474	2.25125	10.0304	0.301796
-153.42	23.91	22.347	8.11674	3.96868	12.3975	0.498268
-158	22.75	24.9619	8.99278	5.37117	14.8311	0.638119
-17.51	36.61	31.0715	11.7438	7.61682	20.4072	0.774849
-158	22.75	25.9219	9.39719	5.89305	15.8266	0.685845
-174.32	-31.32	19.328	7.64028	2.69293	10.5181	0.356838
-158	22.75	23.8419	8.57195	4.75559	13.7226	0.578604
169.35	-27.4	19.0155	7.62691	2.59386	10.3951	0.344977
-75.95	16.56	21.2224	7.86659	3.4329	11.5583	0.440849
-22.94	7.58	28.1085	10.4104	6.94513	18.078	0.769463
-158	22.75	26.3019	9.5661	6.09345	16.2254	0.70334
-158	22.75	25.0619	9.0332	5.42616	14.9334	0.643277
-158	22.75	24.4419	8.78979	5.08463	14.307	0.610805
-131.5	-11.35	21.1638	7.85587	3.40674	11.5189	0.437984
-57.29	-50.99	6.88	9.91331	3.02214	12.9415	0.337052
-88.38	25.51	26.3204	9.57444	6.10307	16.2448	0.704167
-153.42	23.91	22.347	8.11674	3.96868	12.3975	0.498268
-158	22.75	23.7719	8.54776	4.71749	13.6561	0.574821
179.82	-30.1	22.9789	8.29295	4.29328	12.9316	0.531964
-158	22.75	23.7719	8.54776	4.71749	13.6561	0.574821
-153.42	23.91	22.347	8.11674	3.96868	12.3975	0.498268
-55	-43.58	10.5142	9.21249	2.46264	11.6975	0.282013
-30	41.19	22.2457	8.09081	3.91803	12.3158	0.492938
-25.78	1.29	27.5651	10.152	6.71165	17.536	0.753137
-158	22.75	23.2019	8.36094	4.41097	13.1296	0.543988
-30	36.78	21.8105	7.98697	3.70552	11.9783	0.47036
168.1	-26	18.6918	7.62017	2.49868	10.2828	0.333371
-43.46	42.71	21.6119	7.94373	3.6115	11.8317	0.460254
-30	38.48	23.3505	8.40785	4.49015	13.2642	0.552019
-20.66	12.75	30.7329	11.607	7.60758	20.2195	0.78323
-30	59.35	12.6633	8.59773	2.11418	10.7538	0.255684
-158	22.75	25.2919	9.12777	5.55226	15.1702	0.654997
-158	22.75	22.8219	8.24687	4.21132	12.7951	0.52353
-158	22.75	26.2019	9.52124	6.04119	16.1204	0.69883
-158	22.75	25.4319	9.18638	5.62868	15.3152	0.662023
110	-35	17.804	7.63809	2.27741	10.0533	0.305268
-20.01	39.87	19.1056	7.63007	2.62172	10.4291	0.348333
-158	22.75	23.4119	8.42762	4.52304	13.3203	0.555342
-158	22.75	23.7719	8.54776	4.71749	13.6561	0.574821
-158	22.75	23.7719	8.54776	4.71749	13.6561	0.574821
-78.61	11.79	21.6016	7.94156	3.60667	11.8242	0.459732
-139.6	25.77	21.0472	7.83525	3.35525	11.4417	0.432323
-158	22.75	24.2419	8.71514	4.97457	14.1095	0.60013
-25.99	-28.79	21.7904	7.98249	3.69595	11.9633	0.469335
-158	22.75	23.3519	8.40831	4.49091	13.2654	0.552096
110	-35	17.814	7.6376	2.27958	10.0553	0.305553
-175	-31.66	19.4518	7.64744	2.73408	10.5707	0.361709
-45.08	-26.18	25.7323	9.31462	5.79142	15.6282	0.676781
-13.98	48.06	14.052	8.22858	1.98814	10.2767	0.250883
-158	22.75	23.4719	8.44714	4.55526	13.3755	0.558589
110	-33.5	18.23	7.62291	2.37623	10.1491	0.318056
110	-32	19.6166	7.65864	2.79054	10.6441	0.368342
-158	22.75	26.5819	9.69316	6.23764	16.519	0.715581
-139.45	-14.13	21.0373	7.83354	3.35092	11.4353	0.431846
179.4	4.66	30.7317	11.6065	7.60752	20.2188	0.783253
-158	22.75	24.4319	8.78601	5.07912	14.297	0.610273
-127.31	-9.54	21.3587	7.89244	3.49453	11.6519	0.447577
169.56	-27.71	19.0455	7.6279	2.60307	10.4063	0.346088
-22.28	9.05	30.0155	11.2989	7.52177	19.7414	0.792325
-158	22.75	26.2219	9.53019	6.05167	16.1414	0.699737
-17.51	36.61	15.5115	7.91232	1.98078	9.97773	0.259643
-41.35	-29.31	19.5082	7.65106	2.7532	10.5954	0.363961
-74.8	24.03	20.9331	7.81596	3.3056	11.3679	0.426841
-57.29	-50.99	6.88	9.91331	3.02214	12.9415	0.337052
-158	22.75	26.0619	9.45891	5.96744	15.9734	0.692401
-26.4	-0.19	29.0281	10.8463	7.27749	18.9374	0.787999
-158	22.75	23.4519	8.44061	4.54451	13.3571	0.557507
-24.02	5.17	29.7313	11.1713	7.46525	19.5255	0.792943
-55	-43.58	10.5042	9.21527	2.4645	11.7021	0.282172
170	-28.42	19.4336	7.64632	2.72795	10.5628	0.360985
-165.8	-18.5	26.5152	9.66272	6.2036	16.4492	0.71272
-30	38.48	23.3505	8.40785	4.49015	13.2642	0.552019
110	-33.5	18.25	7.6225	2.3812	10.1542	0.318688
-158	22.75	23.4719	8.44714	4.55526	13.3755	0.558589
-42.65	-29.33	23.1644	8.34929	4.39107	13.096	0.541962
-18.21	47.37	18.0697	7.62722	2.33743	10.1099	0.31309
-8.77	42.36	18.4531	7.61979	2.4334	10.2098	0.325268
168.7	-26.35	18.8767	7.62314	2.55213	10.3451	0.339916
-57.29	-50.99	6.92	9.91093	3.01938	12.9365	0.336677
-165.92	-18.43	25.6752	9.28999	5.76064	15.5685	0.674012
110	-38	14.475	8.12781	1.97161	10.1659	0.251873
-8.36	43.37	17.866	7.63514	2.29094	10.0656	0.307047
-18.98	8.82	28.9737	10.8208	7.26039	18.8892	0.787262
-158	22.75	23.9119	8.5964	4.79376	13.7894	0.582383
-158	22.75	25.9219	9.39719	5.89305	15.8266	0.685845
164.65	-19.22	27.2211	9.9897	6.55245	17.1841	0.741065
17.94	-34.94	14.4843	8.12566	1.97138	10.1636	0.251909
-28.94	29.18	24.4634	8.79792	5.09646	14.3283	0.611947
-178.98	-33.72	20.0856	7.70085	2.96126	10.8744	0.388102
-16.98	39.96	23.496	8.45502	4.56819	13.3977	0.559891
-78.43	29.08	21.1424	7.85202	3.39723	11.5046	0.43694
-158	22.75	27.1319	9.94787	6.5099	17.092	0.737736
-158	22.75	23.4719	8.44714	4.55526	13.3755	0.558589
-18.98	8.82	29.1637	10.9099	7.31864	19.0563	0.789628
-78.13	28.68	21.7924	7.98293	3.69688	11.9647	0.469434
-158	22.75	23.4719	8.44714	4.55526	13.3755	0.558589
-132.65	-11.76	18.9979	7.62636	2.58849	10.3886	0.344328
-18.21	47.37	18.0497	7.62787	2.33273	10.1053	0.312483
-158	22.75	23.0119	8.30282	4.3106	12.9606	0.53374
-8.4	43.39	17.276	7.67329	2.174	9.97112	0.29126
-7.6	48.12	22.2705	8.0971	3.93039	12.3357	0.494241
-158	22.75	23.2819	8.38604	4.45353	13.2018	0.548311
-16.08	5.86	26.0113	9.43651	5.94059	15.9203	0.690043
-158	22.75	23.4619	8.44387	4.54988	13.3663	0.558048
-30	41.19	22.2757	8.09842	3.93298	12.3399	0.494514
-14.3	-7.23	24.3583	8.75834	5.03859	14.2241	0.606351
-158	22.75	26.2919	9.56161	6.08824	16.2149	0.702893
-20	47.01	15.3503	7.94259	1.9745	9.99867	0.25792
174.27	-20.75	25.5312	9.22838	5.68265	15.4184	0.666949
-158	22.75	26.2319	9.53467	6.05691	16.1519	0.70019
-21.76	30.05	22.0037	8.03155	3.79881	12.1254	0.480316
-165.88	-18.46	25.5352	9.2301	5.68485	15.4226	0.66715
-30	41.19	22.2857	8.10097	3.93797	12.348	0.495039
-31.27	43.6	22.0517	8.043	3.82225	12.1627	0.482806
-76.61	15.41	21.346	7.88996	3.48871	11.643	0.446943
-18.25	-10.9	24.5386	8.82658	5.1379	14.4033	0.615937
-169.13	-28.55	18.7993	7.62162	2.52945	10.3184	0.337148
-158	22.75	27.1419	9.95256	6.5147	17.1024	0.738113
-79.28	10.57	21.3117	7.88337	3.47314	11.6193	0.445246
-16.98	39.96	23.486	8.45174	4.56281	13.3885	0.559349
-146.93	-16.95	20.8479	7.80215	3.26903	11.3139	0.422788
-38.7	-27.32	18.753	7.6209	2.5161	10.3029	0.335512
-79.3	30.23	21.4557	7.91157	3.53894	11.7198	0.452404
-28.21	-3.92	28.652	10.6689	7.15226	18.5965	0.781933
-20.66	12.75	22.9729	8.29114	4.2901	12.9263	0.531637
179	16	28.305	10.504	7.02331	18.2685	0.774446
-41.7	42.85	21.8865	8.00421	3.742	12.0356	0.474262
-158	22.75	26.6019	9.70231	6.24781	16.54	0.716432
-158	22.75	21.2519	7.87208	3.44617	11.5784	0.442301
110	-32	19.6166	7.65864	2.79054	10.6441	0.368342
-30	41.19	22.2757	8.09842	3.93298	12.3399	0.494514
167.43	-24.27	18.0889	7.62661	2.34199	10.1144	0.313676
-158	22.75	26.6319	9.71605	6.26303	16.5714	0.717703
-30	36.78	23.6805	8.51655	4.66785	13.5698	0.569875
-77.39	15.45	21.0708	7.83935	3.36561	11.4572	0.433464
-35.52	-19.91	25.7088	9.30446	5.77876	15.6036	0.675643
-158	22.75	26.6319	9.71605	6.26303	16.5714	0.717703
-171.8	-29.96	18.8026	7.62167	2.53042	10.3196	0.337266
-26.4	-0.19	29.0081	10.8369	7.27123	18.9197	0.787733
-8.36	43.37	17.656	7.64615	2.24629	10.0262	0.301134
-34.76	-18.27	27.0587	9.91364	6.47462	17.0162	0.734945
167.37	-24.2	18.5789	7.61951	2.46729	10.2472	0.329491
-78.98	29.8	21.7401	7.97136	3.672	11.9258	0.466765
172.86	-32.85	19.3222	7.63997	2.69104	10.5157	0.356613
-35.52	-19.91	25.7088	9.30446	5.77876	15.6036	0.675643
-153.42	23.91	22.347	8.11674	3.96868	12.3975	0.498268
-158	22.75	25.7219	9.31012	5.78582	15.6173	0.676278
-21	21.95	26.9524	9.86407	6.42281	16.9058	0.730801
18.07	-34.89	14.4743	8.12796	1.97163	10.166	0.25187
-34.76	-18.27	27.0787	9.92299	6.4843	17.037	0.735713
-175.96	-32.17	19.0842	7.62927	2.61505	10.4209	0.347531
110	-32	19.6166	7.65864	2.79054	10.6441	0.368342
-158	22.75	24.4319	8.78601	5.07912	14.297	0.610273
-132.76	23.58	20.5713	7.76073	3.15319	11.1452	0.409858
-158	22.75	22.5319	8.16573	4.06214	12.5495	0.508051
-29.61	66.65	5.55007	9.88609	3.02863	12.9182	0.342427
-14.84	-8.02	24.2557	8.72021	4.98214	14.123	0.600867
-158	22.75	22.1719	8.07234	3.8814	12.2571	0.489072
-30	55.25	14.5779	8.10432	1.9693	10.1417	0.2523
170.3	-28.88	19.1713	7.63273	2.64238	10.4546	0.350811
-176.22	-32.3	20.1	7.70239	2.96672	10.8819	0.388728
-158	22.75	26.2619	9.54812	6.07259	16.1834	0.701545
-34.76	-18.27	27.0587	9.91364	6.47462	17.0162	0.734945
-41.48	42.85	22.4165	8.13488	4.00361	12.4541	0.501932
-22.28	9.05	28.1955	10.4518	6.98017	18.1627	0.771732
172.86	-32.83	19.2622	7.6369	2.6715	10.491	0.354289
-20	20.41	22.5204	8.16261	4.05627	12.5399	0.507438
-174.92	-31.62	19.7084	7.66569	2.82277	10.6867	0.372106
-8.77	48.95	13.9809	8.24616	1.992	10.2971	0.250835
-158	22.75	24.5819	8.8432	5.16178	14.4466	0.618229
-75.35	34.73	20.8302	7.79933	3.26145	11.3028	0.421946
-74.03	20.42	21.0629	7.83796	3.36212	11.452	0.43308
-158	22.75	26.5419	9.67489	6.21724	16.4771	0.713869
-74.71	18.8	21	7.82716	3.33461	11.411	0.430047
-74.02	20.12	20.8584	7.80381	3.27349	11.3205	0.423283
-158	22.75	26.3719	9.59768	6.1298	16.2988	0.706456
-54.73	-43.43	12.4942	8.64552	2.13606	10.8216	0.257031
-8.44	43.42	15.4701	7.91997	1.97899	9.9828	0.259182
-17.51	36.61	18.3715	7.62054	2.41206	10.1867	0.322589
-28.48	5.92	30.1056	11.3387	7.53715	19.8069	0.79179
-158	22.75	26.0619	9.45891	5.96744	15.9734	0.692401
-155.15	-20.75	18.2688	7.62213	2.3859	10.1591	0.319285
-57.29	-50.99	6.92	9.91093	3.01938	12.9365	0.336677
-74.65	22.83	21.0204	7.83063	3.34351	11.4242	0.431029
-158	22.75	25.5319	9.2287	5.68306	15.4191	0.666986
-25.99	-28.79	21.7704	7.97805	3.68641	11.9483	0.468312
-144.41	26.15	21.3414	7.88907	3.48661	11.6398	0.446715
-8.77	48.95	13.9809	8.24616	1.992	10.2971	0.250835
-8.1	48.75	12.2356	8.71932	2.17185	10.9284	0.259373
-158	22.75	24.4319	8.78601	5.07912	14.297	0.610273
-158	22.75	26.6219	9.71147	6.25796	16.5609	0.71728
-27.34	-2.02	27.8848	10.3038	6.85191	17.8572	0.763176
-175.07	-31.7	19.4918	7.64998	2.74761	10.5881	0.363303
-18.98	8.82	29.1437	10.9005	7.31272	19.0389	0.789407
-8.44	43.42	15.4701	7.91997	1.97899	9.9828	0.259182
-152.66	-19.32	19.0664	7.62863	2.60954	10.4142	0.346868
-49.59	-35.71	15.0226	8.00794	1.96735	10.0509	0.255009
-8.5	43.45	19.6101	7.65816	2.78827	10.6411	0.368077
177	-30	22.5629	8.17416	4.07796	12.5753	0.5097
-57.29	-50.99	6.87	9.91388	3.02282	12.9427	0.337144
-8.77	48.95	13.9609	8.25113	1.99314	10.3029	0.250828
-158	22.75	22.7019	8.21266	4.14923	12.6924	0.517107
-21.79	26.54	23.3012	8.39213	4.4638	13.2193	0.549351
-35.95	-30.9	19.143	7.63155	2.63344	10.4436	0.34974
-29.94	65.88	3.06763	9.10458	2.39258	11.4985	0.295586
-46.19	-32.61	20.6745	7.77556	3.19587	11.207	0.414638
-151.02	-18.35	19.7724	7.67096	2.84561	10.7171	0.374764
-158	22.75	22.2019	8.0798	3.89626	12.2809	0.490642
-153	-19.5	18.8364	7.6223	2.54027	10.3311	0.33847
-34	25.8	27.6309	10.1832	6.74119	17.6026	0.755302
-123.78	29.61	17.1912	7.68059	2.15938	9.96165	0.289204
-21.57	-13.67	23.4085	8.4265	4.52119	13.3172	0.555156
-158	22.75	23.2919	8.3892	4.45886	13.2109	0.548851
168.75	-26.43	18.8667	7.62292	2.54918	10.3416	0.339556
-16.98	39.96	22.246	8.09087	3.91815	12.316	0.492951
-127.81	26.55	19.8398	7.67681	2.86993	10.7498	0.377584
-42.65	-29.33	23.0844	8.32474	4.34877	13.0247	0.537646
-46.19	-32.61	20.7445	7.78604	3.22518	11.2496	0.41791
-27.34	-2.02	28.0748	10.3943	6.93134	18.0449	0.768555
-41.35	-29.31	17.4282	7.66132	2.20165	9.99071	0.295087
-154.23	-20.22	18.5035	7.61955	2.44684	10.2245	0.326946
-158	22.75	26.5419	9.67489	6.21724	16.4771	0.713869
-178	-15	27.2577	10.0069	6.56976	17.2218	0.742408
-20.42	35.67	19.083	7.62923	2.61468	10.4205	0.347486
-16.93	5.1	28.1283	10.4198	6.95315	18.0973	0.769987
-35.95	-30.9	23.533	8.46721	4.58813	13.432	0.561895
-25.78	1.29	27.5651	10.152	6.71165	17.536	0.753137
-158	22.75	27.1419	9.95256	6.5147	17.1024	0.738113
172.13	-31.73	19.4858	7.6496	2.74559	10.5855	0.363066
-30.95	-10.03	28.0921	10.4025	6.93842	18.0619	0.769022
-10.64	47.96	16.9068	7.70832	2.11428	9.93729	0.2827
-17.45	-10.23	24.7094	8.89264	5.23205	14.5748	0.624946
-54.73	-43.43	10.5642	9.19859	2.45336	11.6747	0.281224
-30	50.84	16.8537	7.71404	2.10654	9.93401	0.281554
-179.8	-34.13	19.767	7.6705	2.84366	10.7145	0.374537
-77.68	28.03	21.5562	7.93208	3.58549	11.7915	0.457445
-158	22.75	25.5419	9.23295	5.68848	15.4296	0.66748
-158	22.75	26.7219	9.7574	6.30843	16.6655	0.72147
-158	22.75	25.8819	9.37967	5.87169	15.7847	0.68395
-158	22.75	24.0319	8.63892	4.85936	13.9049	0.588851
-158	22.75	22.5219	8.16302	4.05705	12.5411	0.50752
-29.94	65.88	2.81763	8.95854	2.26486	11.2247	0.285086
-27.34	-2.02	27.9948	10.3562	6.89827	17.9662	0.766345
-74.61	23.61	21.0856	7.84194	3.37214	11.467	0.434182
-19.87	28.68	22.8564	8.25685	4.22923	12.8248	0.525377
-144.41	26.15	21.4514	7.9107	3.53694	11.7167	0.452187
-21.18	22.96	26.3615	9.59295	6.12438	16.2879	0.705993
179.4	4.66	30.6717	11.5816	7.60368	20.1829	0.784452
-74.46	21.5	20.8842	7.80796	3.28453	11.3368	0.424508
-170.5	-29.28	18.772	7.62118	2.52155	10.3092	0.336181
-42.37	-30.09	17.724	7.64227	2.26039	10.0383	0.303014
47.48	-11.6	26.7408	9.76611	6.31791	16.6853	0.722252
-16.93	5.1	28.0883	10.4007	6.93687	18.0582	0.76892
-21.57	-13.67	23.7685	8.54657	4.71561	13.6528	0.574635
173.73	-34.13	18.8593	7.62276	2.54698	10.339	0.339289
-34.8	43.42	21.8353	7.99258	3.71744	11.997	0.471636
-14.89	1.35	23.711	8.52691	4.68439	13.5985	0.571526
-79.45	10.25	21.4229	7.90502	3.52384	11.6967	0.450765
-123.78	29.61	17.1912	7.68059	2.15938	9.96165	0.289204
-29.76	-7.48	28.8653	10.7697	7.22523	18.7918	0.785647
-150.15	-17.85	20.1625	7.70924	2.99065	10.9151	0.391463
-8.92	42.15	17.1073	7.68826	2.14543	9.95327	0.287221
-42.65	-29.33	23.1144	8.3339	4.36461	13.0514	0.539264
-75.35	17.65	21.1322	7.85019	3.39272	11.4978	0.436445
-158	22.75	21.9519	8.01936	3.77365	12.0856	0.477637
-8.4	43.39	19.816	7.67471	2.86131	10.7382	0.376585
179	11	29.2606	10.955	7.34666	19.1396	0.7906
169.75	-28.03	18.847	7.62251	2.54337	10.3348	0.338849
-19.49	9.71	26.0492	9.45326	5.96069	15.9601	0.691809
-158	22.75	25.5619	9.24147	5.69933	15.4504	0.668465
-21.18	22.96	26.3715	9.59747	6.12956	16.2984	0.706435
-30.95	-10.03	28.0821	10.3978	6.93434	18.0521	0.768753
-144.41	26.15	21.3814	7.89684	3.50484	11.6676	0.448699
-25.03	44.22	22.3305	8.11247	3.9604	12.3842	0.497398
-8.77	42.36	15.9731	7.83297	2.00905	9.93585	0.265645
-21.79	26.54	23.2812	8.3858	4.45313	13.2011	0.54827
-153.58	-19.85	18.7942	7.62153	2.52796	10.3167	0.336966
-173.17	-30.7	19.0659	7.62861	2.60939	10.414	0.34685
-46.19	-32.61	20.7345	7.78452	3.22097	11.2435	0.417441
-127.81	26.55	19.0698	7.62875	2.61058	10.4155	0.346993
-19.87	28.68	14.4964	8.1229	1.97108	10.1608	0.251955
-123.78	29.61	17.1912	7.68059	2.15938	9.96165	0.289204
-8.83	42.22	18.2731	7.62205	2.38698	10.1602	0.319421
-177.61	-33	20.0145	7.69347	2.93444	10.8375	0.385025
-8.36	43.37	21.306	7.88229	3.47057	11.6154	0.444966
-29.01	36.16	18.4625	7.61973	2.43589	10.2125	0.325579
-158	22.75	23.0119	8.30282	4.3106	12.9606	0.53374
-46.6	-33.15
-8.86	42.22	15.8565	7.85196	2.00045	9.94385	0.263979
-162.56	-24.95	17.6931	7.644	2.25393	10.0327	0.302155
-21.26	30.91	17.187	7.68096	2.15867	9.9612	0.289104
-165.25	-26.43	20.9123	7.81254	3.29664	11.3546	0.425849
-17.45	-10.23	17.76	7.64034	2.26799	10.0449	0.304023
-158	22.75	24.5594	8.83454	5.14936	14.4241	0.617037
-12.45	46.08	23.6119	8.49347	4.63074	13.5055	0.566166
-42.91	-29.85	22.8762	8.26264	4.23958	12.842	0.526444
-144.41	26.15	19.324	7.64006	2.69163	10.5164	0.356683
169	-26.83	21.4514	7.9107	3.53694	11.7167	0.452187
-78.68	29.42	18.4914	7.61959	2.44361	10.221	0.326544
110	-18.4	21.4017	7.90084	3.51414	11.6818	0.449711
-8.37	43.36	20.6301	7.76909	3.17744	11.1802	0.412577
-158	22.75	20.836	7.80025	3.26393	11.3064	0.422222
-8.36	43.37	23.6919	8.52044	4.67406	13.5805	0.570495
-158	22.75	17.976	7.63052	2.31566	10.0888	0.310273
-158	22.75	26.7119	9.7528	6.3034	16.6551	0.721055
-8.44	43.42	25.7419	9.31876	5.79659	15.6382	0.677245
-78.85	11.33	17.2701	7.67378	2.17297	9.97043	0.291116
-17.05	32.43	21.5127	7.92312	3.56527	11.7603	0.455258
-74.02	20.07	17.7557	7.64056	2.26708	10.0441	0.303902
-131.85	24.13	20.9384	7.81683	3.30788	11.3713	0.427094
-21.97	27.25	20.2147	7.71516	3.01081	10.9432	0.393762
170.5	-29.2	25.8489	9.36523	5.854	15.7501	0.682377
18.01	-33.62	19.2854	7.63805	2.67901	10.5005	0.355184
-177.23	-32.81	10.9621	9.08635	2.38059	11.4927	0.275162
-131.85	24.13	19.6502	7.66115	2.80227	10.6596	0.369714
-123.78	29.61	20.2147	7.71516	3.01081	10.9432	0.393762
-163	-18.41	17.2012	7.6797	2.16107	9.96271	0.289444
-135.41	-12.72	26.8761	9.82864	6.38526	16.8264	0.727764
-102.35	17.68	21.0556	7.8367	3.35892	11.4472	0.432728
-158	22.75	18.0809	7.62686	2.34009	10.1126	0.313432
-24.02	5.17	25.2219	9.09876	5.51395	15.0979	0.651453
-131.85	24.13	29.9013	11.248	7.5005	19.6563	0.792766
-35.52	-19.91	20.2147	7.71516	3.01081	10.9432	0.393762
179	11	25.6988	9.30015	5.77337	15.5932	0.675158
-23.22	44.46	29.2606	10.955	7.34666	19.1396	0.7906
-127.81	26.55	22.5738	8.17713	4.08351	12.5844	0.510278
-38.7	-27.32	19.0398	7.62771	2.60132	10.4042	0.345877
-23.12	44.37	20.183	7.71154	2.99854	10.9261	0.392363
-75.53	25.07	22.3291	8.1121	3.95968	12.383	0.497323
-158	22.75	20.9712	7.8223	3.32209	11.3923	0.428664
-134.89	24.27	23.4319	8.4341	4.53377	13.3387	0.556425
-131.85	24.13	20.4954	7.75028	3.12221	11.1007	0.406375
-158	22.75	20.2047	7.71401	3.00693	10.9378	0.39332
-49.89	34.1	24.1019	8.66407	4.89771	13.9728	0.592618
-35.15	-24.6	19.8593	7.67856	2.87702	10.7593	0.378405
-31.46	-11.24	22.2048	8.08053	3.89771	12.2832	0.490795
-54.02	41.83	28.9358	10.803	7.24824	18.8553	0.786718
-29.12	-5.92	21.8965	8.00653	3.74687	12.0433	0.474781
-29.27	-6.48	28.4518	10.5738	7.07933	18.4087	0.777824
-155.55	-20.96	26.8876	9.83399	6.39095	16.8384	0.728226
-74.46	21.5	18.0888	7.62661	2.34196	10.1144	0.313672
-29.12	-5.92	21.0442	7.83472	3.35392	11.4397	0.432176
-24.08	-15.75	28.4918	10.5928	7.09423	18.4465	0.778692
-8.36	43.37	23.1019	8.33008	4.35801	13.0402	0.538589
-158	22.75	21.366	7.89384	3.49783	11.6569	0.447936
-19.24	12.79	22.8219	8.24687	4.21132	12.7951	0.52353
-20.66	12.75	17.3289	7.66897	2.18341	9.97755	0.29257
-21.76	30.05	28.9729	10.8204	7.26011	18.8884	0.787249
-30	45.36	22.3337	8.11328	3.96197	12.3867	0.497563
-35.95	-30.9	20.1661	7.70963	2.99201	10.917	0.391618
-21.26	30.91	18.573	7.6195	2.46566	10.2454	0.329289
-165.88	-18.46	20.9323	7.81583	3.30526	11.3674	0.426804
177	-30	27.3452	10.0481	6.61082	17.3117	0.745565
-143.38	-15.78	22.9129	8.2734	4.25874	12.8739	0.528416
-159.32	-23.12	21.2041	7.86323	3.42474	11.546	0.439956
-153.78	-19.96	17.2456	7.67586	2.1687	9.9676	0.290517
-158	22.75	18.7623	7.62103	2.51875	10.306	0.335837
-32.86	-14.11	23.0419	8.31186	4.32638	12.9871	0.535355
-132.76	23.58	26.8067	9.79651	6.35082	16.7541	0.724956
-158	22.75	20.4513	7.74441	3.10439	11.0753	0.404368
-30	46.74	24.8619	8.95279	5.31611	14.7292	0.632926
-160	-18.27	20.5304	7.75505	3.13645	11.1212	0.407977
-74.33	21.17	27.8708	10.2972	6.84595	17.8433	0.762763
-34.84	-31.37	20.9618	7.82073	3.31802	11.3863	0.428215
-158	22.75	17.4666	7.65853	2.2089	9.99617	0.296079
-27.45	-2.39	26.6319	9.71605	6.26303	16.5714	0.717703
-20	24.51	26.6631	9.73038	6.27882	16.6041	0.719017
-18.98	8.82	29.34	10.9919	7.36872	19.207	0.791276
-158	22.75	22.0437	8.04109	3.81836	12.1565	0.482393
-161.1	-24.13	23.6119	8.49347	4.63074	13.5055	0.566166
-46.6	-33.15	17.1276	7.68636	2.14875	9.9552	0.287696
-158	22.75	15.8865	7.847	2.00257	9.94163	0.264398
-158	22.75	23.7519	8.54089	4.70662	13.6371	0.57374
-29.12	-5.92	22.6819	8.20705	4.13893	12.6754	0.516039
-74.65	22.7	28.4218	10.5595	7.06806	18.3802	0.777158
-20.42	35.67	20.8704	7.80574	3.27862	11.328	0.423852
-74.65	22.46	19.073	7.62887	2.61158	10.4167	0.347113
-132.76	23.58	21.1104	7.84631	3.38306	11.4833	0.435383
-77.32	27.55	20.4513	7.74441	3.10439	11.0753	0.404368
-19.87	28.68	21.8154	7.98808	3.70788	11.982	0.470613
-158	22.75	25.3664	9.15884	5.59294	15.2472	0.658744
-132.76	23.58	26.1019	9.47666	5.98858	16.0154	0.694251
-32.86	-14.11	20.4513	7.74441	3.10439	11.0753	0.404368
-74.73	18.74	26.8067	9.79651	6.35082	16.7541	0.724956
-39.6	-26.62	21.35	7.89074	3.49054	11.6458	0.447142
-158	22.75	20.7095	7.78076	3.21049	11.2282	0.416272
-17.44	5.98	21.6619	7.95438	3.63501	11.8682	0.462788
-158	22.75	28.2781	10.4912	7.01284	18.2427	0.773796
-158	22.75	21.8519	7.99633	3.72539	12.0095	0.472486
-158	22.75	23.5519	8.47348	4.59834	13.4496	0.562919
-158	22.75	24.2019	8.70045	4.95259	14.0703	0.597986
-170.08	-29.07	22.6119	8.18759	4.10299	12.6163	0.512306
-170.9	-29.5	18.8418	7.6224	2.54184	10.333	0.338661
-163.81	-25.65	19.0757	7.62896	2.61241	10.4177	0.347213
-171.05	-29.56	17.4144	7.66235	2.19906	9.98879	0.294731
-77.18	27.35	18.6457	7.6198	2.48574	10.2681	0.331775
-20.78	-13.03	21.5798	7.93699	3.59648	11.8085	0.458633
-158	22.75	24.2823	8.73005	4.99676	14.1491	0.602291
-8.77	48.95	24.0519	8.64608	4.87031	13.9243	0.589928
-158	22.75	13.0809	8.48177	2.06572	10.5943	0.253026
-2.63	-5.86	23.5419	8.47017	4.59295	13.4403	0.562378
-158	22.75	22.5652	8.17477	4.07911	12.5772	0.50982
-31.52	-21.74	20.6619	7.77371	3.19062	11.1993	0.414052
-75.27	24.68	23.0018	8.2998	4.30531	12.9518	0.533198
-14.89	1.35	21.2168	7.86557	3.43043	11.5546	0.440579
-161.64	-24.43	23.891	8.58905	4.78233	13.7694	0.581252
-165.92	-18.43	17.2759	7.6733	2.17399	9.97111	0.291258
-54.4	-43.48	27.2352	9.99633	6.55914	17.1987	0.741585
-43.33	42.71	13.9225	8.26073	1.9954	10.3142	0.250821
-158	22.75	22.2822	8.10008	3.93623	12.3451	0.494856
-158	22.75	22.8219	8.24687	4.21132	12.7951	0.52353
-8.36	43.37	25.3119	9.1361	5.5632	15.1909	0.656006
-8.44	43.42	17.786	7.639	2.27354	10.0499	0.304756
-30	45.36	14.5701	8.10609	1.96946	10.1435	0.252265
-20.42	35.67	20.4161	7.7398	3.09022	11.0551	0.402769
-30	49.44	17.843	7.63621	2.28589	10.061	0.306384
-55	-43.58	17.9192	7.63281	2.30278	10.0766	0.308597
-36.63	-22.15	9.80418	9.40311	2.59576	12.0167	0.29369
-21.19	31.57	26.635	9.71745	6.26457	16.5746	0.717832
-8.89	42.17	25.8232	9.35406	5.84027	15.7233	0.681153
-8.5	43.45	16.8173	7.71807	2.10135	9.93198	0.280779
-28.24	-19.13	19.5001	7.65053	2.75044	10.5918	0.363636
-33.31	-15.17	23.1908	8.35749	4.40509	13.1197	0.54339
-30	45.36	28.3739	10.5368	7.04988	18.3346	0.77607
-8.77	48.95	20.2361	7.71764	3.01911	10.9548	0.394706
-14.05	43.92	13.4609	8.37956	2.02918	10.4604	0.251486
-27.45	-2.39	22.8828	8.26458	4.24303	12.8478	0.526799
-28.24	-19.13	26.6531	9.72579	6.27377	16.5936	0.718597
-45.79	-26.72	22.9108	8.27279	4.25764	12.8721	0.528303
-158	22.75	26.1668	9.50556	6.02277	16.0836	0.697231
-55.94	-47.62	22.0919	8.05271	3.84197	12.1941	0.484898
-75.7	25.3	7.49125	9.8597	2.96689	12.8343	0.330312
-165.8	-18.5	21.3412	7.88904	3.48654	11.6397	0.446707
-15.35	2.16	27.2252	9.99163	6.5544	17.1883	0.741217
-158	22.75	24.6463	8.86807	5.19726	14.5112	0.621626
-158	22.75	25.3119	9.1361	5.5632	15.1909	0.656006
-102.35	17.68	26.1119	9.4811	5.99385	16.0259	0.694712
-158	22.75	22.8709	8.2611	4.23682	12.8374	0.526159
-165.8	-18.5	23.5319	8.46686	4.58756	13.431	0.561837
-165.8	-18.5	27.2252	9.99163	6.5544	17.1883	0.741217
-21.76	30.05	27.2252	9.99163	6.5544	17.1883	0.741217
-76.45	26.33	22.5737	8.17709	4.08344	12.5843	0.510271
-20.78	-13.03	21.4717	7.91479	3.5463	11.7311	0.453202
-77.88	28.33	23.8823	8.58602	4.77759	13.7611	0.580784
-172.17	-30.17	21.3662	7.89388	3.49792	11.6571	0.447946
-21.76	30.05	18.8226	7.62203	2.53624	10.3264	0.337978
-29.61	66.65	22.6037	8.18532	4.09878	12.6094	0.511868
-76.93	27.02	5.83007	9.91046	3.04276	12.9571	0.342602
-39.6	-26.62	21.4898	7.91845	3.55466	11.744	0.454109
110	-11.5	20.7995	7.79452	3.24842	11.2836	0.420498
-161.37	-24.27	24.1675	8.68788	4.9337	14.0366	0.596141
-158	22.75	17.1876	7.68091	2.15876	9.96126	0.289117
-74.12	21.81	24.1219	8.67131	4.90868	13.9922	0.593692
-162.53	-24.93	21.2242	7.86692	3.43371	11.5596	0.440938
-21.78	26.22	17.007	7.69798	2.12947	9.94457	0.284923
-158	22.75	25.9539	9.41124	5.91011	15.8602	0.687355
-158	22.75	23.0419	8.31186	4.32638	12.9871	0.535355
-158	22.75	26.1219	9.48555	5.99913	16.0364	0.695172
174.14	-34.74	23.3419	8.40511	4.48556	13.2563	0.551555
-163	-18.41	19.2803	7.6378	2.67738	10.4984	0.354989
-16.93	5.1	27.3461	10.0485	6.61122	17.3126	0.745595
-158	22.75	28.0983	10.4055	6.94096	18.0679	0.769189
-35.95	-30.9	24.0319	8.63892	4.85936	13.9049	0.588851
-160	-18.27	23.923	8.60029	4.7998	13.8	0.58298
-8.44	43.42	27.8808	10.3019	6.85022	17.8533	0.763059
-165.92	-18.43	15.3701	7.93879	1.97517	9.99592	0.258122
-158	22.75	27.3952	10.0717	6.63405	17.3629	0.747333
-140.92	-14.71	23.3819	8.41794	4.50696	13.2928	0.553719
-158	22.75	21.1106	7.84635	3.38316	11.4835	0.435394
-165.92	-18.43	22.1719	8.07234	3.8814	12.2571	0.489072
-158	22.75	27.2652	10.0104	6.57331	17.2295	0.742683
-158	22.75	22.6219	8.19035	4.10812	12.6247	0.512839
-158	22.75	23.9319	8.60343	4.80468	13.8086	0.583462
-163	-18.41	23.3819	8.41794	4.50696	13.2928	0.553719
-34.13	-23.8	27.3361	10.0438	6.60655	17.3023	0.745239
-158	22.75	23.3042	8.39311	4.46543	13.2221	0.549517
-36.96	-22.92	24.0419	8.6425	4.86483	13.9146	0.58939
-29.27	-6.48	22.5719	8.1766	4.08251	12.5828	0.510175
177.35	-35.56	26.8676	9.82472	6.38107	16.8176	0.727424
-21.19	31.57	19.432	7.64623	2.72745	10.5621	0.360925
-163	-18.41	25.4832	9.20804	5.6566	15.3685	0.664576
-160	-18.27	27.4161	10.0815	6.64368	17.3842	0.748062
-32.93	43.51	27.8808	10.3019	6.85022	17.8533	0.763059
-36.63	-22.15	21.7314	7.96945	3.66787	11.9194	0.466322
-36.63	-22.15	26.645	9.72204	6.26964	16.5851	0.718253
-64.25	31.7	26.695	9.74501	6.29488	16.6374	0.720349
-58.06	-47.21	21.4148	7.90342	3.52014	11.691	0.450363
-165.88	-18.46	6.33092	9.92824	3.04627	12.9793	0.341064
-19.99	42.9	27.3552	10.0528	6.61548	17.322	0.745921
-31.46	-11.24	20.3879	7.73619	3.07898	11.0391	0.401498
-158	22.75	28.8858	10.7794	7.23198	18.8104	0.785967
-10.64	47.96	23.9619	8.61402	4.82107	13.8374	0.58508
-35.15	-24.6	19.9668	7.6887	2.91662	10.8131	0.382975
-70.03	39.23	21.9048	8.00844	3.75087	12.0496	0.475208
171.17	-30.23	15.4069	7.93182	1.9765	9.99096	0.258503
-165.88	-18.46	19.3203	7.63986	2.6904	10.5148	0.356537
-158	22.75	27.3552	10.0528	6.61548	17.322	0.745921
-158	22.75	23.9519	8.61049	4.8156	13.8278	0.584541
-18.21	47.37	26.1119	9.4811	5.99385	16.0259	0.694712
-36.08	-30.08	16.0697	7.81779	2.01693	9.93057	0.267104
-21.97	27.25	23.2666	8.38121	4.44538	13.188	0.547484
-8.44	43.42	25.8489	9.36523	5.854	15.7501	0.682377
-156.07	-21.28	17.8701	7.63495	2.29185	10.0665	0.307166
-158	22.75	17.8323	7.63671	2.28356	10.0589	0.306078
-158	22.75	25.3219	9.14026	5.56866	15.2012	0.65651
-154.78	-20.53	22.8719	8.26138	4.23733	12.8383	0.526212
-127.81	26.55	18.2658	7.62219	2.38514	10.1583	0.319188
-158	22.75	19.0398	7.62771	2.60132	10.4042	0.345877
-139.21	-8.99	25.2619	9.11531	5.53585	15.1392	0.653481
-50.56	42.12	28.1791	10.444	6.97364	18.1468	0.771314
-31.52	-21.74	21.1005	7.84456	3.37869	11.4768	0.434903
-157.4	-22.03	23.1318	8.33926	4.37383	13.0669	0.540205
-21.4	24.68	17.3691	7.66579	2.19071	9.98271	0.293581
-24.91	-16.43	26.392	9.60677	6.1402	16.3199	0.707343
-39.19	-26.1	23.3508	8.40795	4.49031	13.2644	0.552036
-158	22.75	25.1907	9.08588	5.49684	15.0657	0.649865
-45.28	-25.77	22.2819	8.1	3.93607	12.3449	0.494839
-158	22.75	26.2587	9.54669	6.07092	16.18	0.701401
-71.3	34.68	23.4019	8.42439	4.51768	13.3112	0.554801
-20.01	38.17	19.6967	7.66476	2.81864	10.6812	0.371625
-160	-18.27	24.1154	8.66896	4.90512	13.9859	0.593344
-158	22.75	27.8308	10.2781	6.8288	17.8035	0.761566
-159.78	-23.4	23.8119	8.56155	4.73925	13.694	0.576983
-36.96	-22.92	17.3756	7.66529	2.19189	9.98356	0.293744
-158	22.75	22.5919	8.18207	4.09273	12.5995	0.511239
-68.07	40.51	22.3819	8.12581	3.9862	12.4259	0.500107
-158	22.75	21.719	7.96674	3.66198	11.9102	0.465689
-158	22.75	21.9519	8.01936	3.77365	12.0856	0.477637
-158	22.75	26.1019	9.47666	5.98858	16.0154	0.694251
-167.33	-27.56	26.1619	9.50337	6.02019	16.0784	0.697006
-8.44	43.42	18.589	7.61953	2.47005	10.2503	0.329833
-34.13	-23.8	19.8501	7.67773	2.87369	10.7548	0.378019
-158	22.75	23.4442	8.43811	4.54038	13.35	0.557091
-36.26	-30.94	26.5819	9.69316	6.23764	16.519	0.715581
-66.28	40.46	24.183	8.69352	4.94219	14.0517	0.596971
-158	22.75	21.6072	7.94275	3.60932	11.8283	0.460018
-158	22.75	24.9619	8.99278	5.37117	14.8311	0.638119
-102.35	17.68	24.8319	8.94087	5.29959	14.6988	0.631362
-39.19	-26.1	26.8309	9.80773	6.36289	16.7794	0.725942
-36.96	-22.92	25.1407	9.06535	5.46942	15.0143	0.647315
-158	22.75	22.7319	8.22112	4.16468	12.7179	0.518708
-158	22.75	25.2619	9.11531	5.53585	15.1392	0.653481
-21.4	24.68	24.7519	8.90931	5.2555	14.6177	0.627179
-156.86	-21.73	26.942	9.85926	6.41773	16.8951	0.730392
-21.4	24.68	17.7995	7.63832	2.27643	10.0524	0.305139
-163.06	-25.22	26.922	9.84996	6.40791	16.8743	0.729599
-168.53	-28.22	17.603	7.64939	2.23554	10.0173	0.299691
-8.37	43.36	18.6807	7.62007	2.49554	10.2792	0.332984
-8.36	43.37	21.286	7.87849	3.46153	11.6017	0.443979
-111.78	-25.83	21.456	7.91163	3.53907	11.72	0.452419
-8.37	43.36	22.5997	8.18422	4.09673	12.6061	0.511655
-30	46.74	17.646	7.64675	2.24425	10.0245	0.30086
-101.16	-29.72	18.0004	7.62961	2.32126	10.0942	0.311
-24.08	-15.75	20.5936	7.76386	3.16234	11.1584	0.410884
-158	22.75	23.1219	8.3362	4.36857	13.058	0.539668
-158	22.75	23.0019	8.29982	4.30534	12.9518	0.533201
-57.66	41.53	25.1519	9.06995	5.47558	15.0258	0.647888
-27.41	-18.46	21.4711	7.91468	3.54605	11.7307	0.453175
-19.99	42.9	23.5151	8.46133	4.57852	13.4155	0.560929
-158	22.75	20.7379	7.78504	3.22242	11.2456	0.417602
-158	22.75	22.4319	8.13896	4.01142	12.4668	0.50275
-10.63	46.86	22.5719	8.17661	4.08254	12.5828	0.510177
-158	22.75	22.6058	8.18592	4.09989	12.6112	0.511983
-158	22.75	21.8919	8.00547	3.74464	12.0398	0.474543
-158	22.75	25.2919	9.12777	5.55226	15.1702	0.654997
-158	22.75	22.7019	8.21266	4.14923	12.6924	0.517107
-37.76	-26.61	22.4919	8.15494	4.04181	12.5163	0.505928
-30	61.91	20.7588	7.78822	3.23119	11.2584	0.41858
-155.23	-20.8	11.0896	9.04989	2.35779	11.4344	0.273311
-15.91	44.93	18.2488	7.62252	2.3809	10.1539	0.31865
-158	22.75	23.17	8.35104	4.39406	13.101	0.542266
-158	22.75	21.9019	8.00777	3.74946	12.0474	0.475058
-158	22.75	21.9119	8.01007	3.75429	12.055	0.475573
19.39	39.39	20.7219	7.78262	3.21569	11.2358	0.416851
-10.64	47.96	19.7434	7.66853	2.83521	10.7033	0.373554
-158	22.75	20.0068	7.69268	2.93154	10.8335	0.384692
-158	22.75	22.8319	8.24976	4.21652	12.8037	0.524066
-8.93	47.56	22.7219	8.2183	4.15954	12.7094	0.518176
-40.71	-27.62	22.4946	8.15566	4.04316	12.5185	0.50607
-30	42.7	24.5962	8.84869	5.16964	14.4609	0.618982
-41.35	42.88	16.7303	7.728	2.08938	9.92789	0.278971
-30.88	63.33	22.2665	8.09606	3.92836	12.3325	0.494027
-20.01	38.17	9.92526	9.37166	2.57305	11.9632	0.291651
-37.76	-26.61	24.1154	8.66896	4.90512	13.9859	0.593344
-158	22.75	21.8988	8.00704	3.74794	12.045	0.474896
-21.19	31.57	25.0719	9.03727	5.43165	14.9436	0.643791
-158	22.75	25.8132	9.3497	5.83491	15.7128	0.680674
-35.05	-18.86	24.7519	8.90931	5.2555	14.6177	0.627179
-8.44	43.42	24.3504	8.75538	5.03423	14.2163	0.605929
-30	45.36	20.1001	7.7024	2.96677	10.882	0.388733
-27.45	-2.39	20.0061	7.69261	2.93126	10.8331	0.38466
-17.71	44.78	26.6731	9.73497	6.28387	16.6145	0.719436
47.51	-11.81	23.0839	8.32458	4.34849	13.0242	0.537617
-158	22.75	26.5395	9.67378	6.216	16.4746	0.713764
-158	22.75	22.0519	8.04305	3.82236	12.1628	0.482818
-19.99	42.9	23.0419	8.31186	4.32638	12.9871	0.535355
-158	22.75	21.0179	7.83022	3.34245	11.4226	0.430912
-158	22.75	22.4319	8.13896	4.01142	12.4668	0.50275
-158	22.75	20.8319	7.7996	3.26219	11.3039	0.422028
-59.08	41.42	22.1119	8.05758	3.8518	12.2097	0.48594
-57.89	-51.93	21.5809	7.93722	3.597	11.8093	0.458689
-39.19	-26.1	5.25849	9.84885	3.00367	12.8556	0.341358
-31.24	-10.78	25.1307	9.06125	5.46393	15.004	0.646803
-40.71	-27.62	26.6443	9.72172	6.26928	16.5843	0.718223
32.89	33.92	24.5862	8.84484	5.16412	14.4509	0.618454
-102.35	17.68	22.3581	8.1196	3.97421	12.4065	0.498848
-158	22.75	19.0309	7.62742	2.5986	10.4009	0.345549
-158	22.75	25.1019	9.04949	5.44813	14.9744	0.64533
-158	22.75	21.9719	8.02405	3.78335	12.1009	0.478671
-11.8	46.37	21.5919	7.93953	3.60216	11.8172	0.459246
-57.89	-51.93	22.7609	8.22937	4.1797	12.7427	0.520263
-158	22.75	5.21849	9.84276	2.99939	12.8452	0.341136
-32.81	43.58	26.5019	9.65665	6.19678	16.4352	0.712144
-158	22.75	22.5293	8.16503	4.06083	12.5473	0.507914
-53.37	41.88	21.5919	7.93953	3.60216	11.8172	0.459246
-158	22.75	21.4424	7.90891	3.53282	11.7104	0.45174
-158	22.75	22.1219	8.06002	3.85673	12.2176	0.486462
-31.24	-10.78	21.8419	7.99406	3.72059	12.0019	0.471972
-28.03	43.95	26.6343	9.71713	6.26422	16.5739	0.717802
-158	22.75	22.6857	8.2081	4.14087	12.6786	0.516241
-57.89	-51.93	24.0319	8.63892	4.85936	13.9049	0.588851
-158	22.75	5.25849	9.84885	3.00367	12.8556	0.341358
-158	22.75	21.9719	8.02405	3.78335	12.1009	0.478671
-158	22.75	22.8919	8.26723	4.24776	12.8556	0.527286
-158	22.75	21.2619	7.87395	3.45067	11.5852	0.442793
-158	22.75	22.4719	8.14959	4.03166	12.4997	0.504868
-30.88	63.33	21.8719	8.00088	3.735	12.0246	0.473514
-21.78	26.22	9.81526	9.40026	2.59369	12.0118	0.293503
-42.73	42.78	25.7939	9.34131	5.82455	15.6926	0.679749
-158	22.75	22.2322	8.08741	3.91132	12.3051	0.492231
-39.76	43	22.6919	8.20985	4.14408	12.6839	0.516573
-102.35	17.68	22.434	8.13953	4.0125	12.4686	0.502863
-8.37	43.36	20.6409	7.77065	3.18191	11.1867	0.413077
-158	22.75	20.626	7.7685	3.17573	11.1778	0.412385
-36.76	43.25	19.9019	7.68249	2.89263	10.7805	0.38021
-36.08	-30.08	22.3977	8.12995	3.99416	12.4388	0.500942
-158	22.75	24.6166	8.85659	5.18092	14.4814	0.620062
-158	22.75	21.0919	7.84305	3.37491	11.4711	0.434487
-33.12	-14.9	22.4919	8.15494	4.04181	12.5163	0.505928
-158	22.75	26.1413	9.49419	6.00935	16.0568	0.696063
-43.42	-30.3	21.7819	7.9806	3.69189	11.9569	0.468899
-21.81	29.5	22.7532	8.22717	4.1757	12.7361	0.519849
-158	22.75	26.251	9.54323	6.0669	16.1719	0.701053
-158	22.75	20.9819	7.8241	3.32675	11.3993	0.429179
-46.62	-33.39	20.8719	7.80598	3.27928	11.329	0.423925
-19.76	44.61	20.1265	7.70526	2.97684	10.8959	0.389885
-46.38	42.46	22.9414	8.28182	4.27365	12.8988	0.529948
-158	22.75	22.016	8.03447	3.8048	12.1349	0.480953
-158	22.75	21.9519	8.01936	3.77365	12.0856	0.477637
-158	22.75	20.7919	7.79333	3.2452	11.2789	0.420139
-8.4	43.39	23.0819	8.32398	4.34746	13.0225	0.537511
-158	22.75	20.506	7.75172	3.12652	11.1069	0.406861
-158	22.75	22.6119	8.18759	4.10299	12.6163	0.512306
-37.87	-24.35	22.0919	8.05271	3.84197	12.1941	0.484898
-37.87	-24.35	25.2142	9.0956	5.50975	15.09	0.651063
-8.32	43.42	25.2042	9.09147	5.50427	15.0797	0.650555
-21.53	44.48	17.5801	7.65084	2.23098	10.0136	0.299076
-36.08	-30.08	22.7571	8.2283	4.17774	12.7395	0.520061
-21.81	29.5	19.3566	7.64184	2.70235	10.53	0.357956
-37.87	-24.35	26.231	9.53427	6.05644	16.1509	0.70015
-33.12	-14.9	25.2142	9.0956	5.50975	15.09	0.651063
-35.77	-30.67	26.1213	9.48529	5.99882	16.0358	0.695145
-29.73	43.83	17.7768	7.63947	2.27157	10.0481	0.304496
-14.05	43.92	22.6353	8.19407	4.115	12.636	0.513554
-158	22.75	22.1228	8.06025	3.85719	12.2183	0.486511
-158	22.75	19.7419	7.66841	2.83469	10.7026	0.373494
-30	49.44	24.4919	8.80876	5.11218	14.3567	0.613462
-158	22.75	17.7992	7.63833	2.27638	10.0524	0.305132
-46.62	-33.39	20.7619	7.7887	3.23251	11.2604	0.418727
-49.81	-36.06	19.6165	7.65863	2.7905	10.6441	0.368338
-158	22.75	19.9726	7.68927	2.91876	10.816	0.383222
-105	15.77	22.1419	8.06493	3.86658	12.2334	0.487505
-158	22.75	26.9018	9.84056	6.39793	16.8532	0.728792
-57.89	-51.93	20.7619	7.7887	3.23251	11.2604	0.418727
-43.42	-30.3	5.14849	9.83151	2.99137	12.8258	0.340703
-158	22.75	22.7432	8.22433	4.17053	12.7275	0.519314
-31.53	43.68	21.2919	7.87961	3.4642	11.6058	0.444271
-158	22.75	22.4717	8.14953	4.03155	12.4996	0.504856
-26.66	44.07	19.7619	7.67007	2.84184	10.7121	0.374326
-34.84	-31.37	22.7878	8.23705	4.19361	12.7657	0.521701
-158	22.75	16.5366	7.75173	2.06475	9.92253	0.27515
-57.89	-51.93	21.3619	7.89305	3.49597	11.6541	0.447734
-158	22.75	5.03849	9.8123	2.97741	12.7925	0.339903
-158	22.75	19.8719	7.67971	2.88164	10.7656	0.378939
-102.35	17.68	20.0019	7.69219	2.92971	10.831	0.384482
-46.62	-33.39	23.4309	8.43379	4.53324	13.3378	0.556371
-35.77	-30.67	19.7765	7.6713	2.84708	10.7191	0.374934
-158	22.75	24.3368	8.75031	5.02676	14.2028	0.605204
-21.81	29.5	22.0819	8.05029	3.83706	12.1862	0.484378
-158	22.75	26.261	9.54772	6.07212	16.1824	0.701504
-158	22.75	21.4019	7.90088	3.51424	11.682	0.449722
-158	22.75	21.7819	7.9806	3.69189	11.9569	0.468899
-53.3	-39.35	20.9019	7.81084	3.29215	11.348	0.425353
-158	22.75	18.6965	7.62022	2.50002	10.2844	0.333536
-38.15	43.15	20.5119	7.75253	3.12892	11.1104	0.407131
-158	22.75	22.4936	8.1554	4.04266	12.5177	0.506017
-102.35	17.68	23.6419	8.50354	4.64697	13.5336	0.56779
-158	22.75	22.8709	8.2611	4.23682	12.8374	0.526159
-158	22.75	20.7619	7.7887	3.23251	11.2604	0.418727
-158	22.75	21.3819	7.89695	3.50509	11.668	0.448727
-158	22.75	19.1019	7.62993	2.62057	10.4277	0.348194
-35.05	-18.86	20.4119	7.73927	3.08856	11.0528	0.402581
-158	22.75	24.9904	9.00425	5.38684	14.8602	0.639591
-53.3	-39.35	23.4519	8.44061	4.54451	13.3571	0.557507
-158	22.75	18.7065	7.62033	2.50285	10.2876	0.333885
-158	22.75	21.8519	7.99633	3.72539	12.0095	0.472486
-158	22.75	20.2319	7.71716	3.01749	10.9525	0.394523
-158	22.75	21.3219	7.88533	3.47779	11.6264	0.445753
-158	22.75	21.2919	7.87961	3.4642	11.6058	0.444271
-158	22.75	19.1719	7.63276	2.64258	10.4549	0.350835
-158	22.75	21.5419	7.92912	3.57884	11.7812	0.456726
-158	22.75	21.1619	7.85554	3.40591	11.5177	0.437892
-20.01	38.17	24.4919	8.80876	5.11218	14.3567	0.613462
-158	22.75	24.0654	8.65093	4.87771	13.9373	0.590655
-57.89	-51.93	21.0219	7.8309	3.34418	11.4252	0.431103
-158	22.75	5.10849	9.82474	2.98649	12.8141	0.340429
-19.82	35.87	20.9619	7.82075	3.31807	11.3864	0.42822
-158	22.75	24.6595	8.87321	5.20456	14.5245	0.622323
-158	22.75	24.4919	8.80876	5.11218	14.3567	0.613462
-36.2	-31.05	26.7819	9.78507	6.33847	16.7282	0.723944
-158	22.75	17.683	7.64458	2.25184	10.0309	0.301875
-158	22.75	20.3319	7.72916	3.05672	11.0076	0.398978
-158	22.75	20.6719	7.77518	3.19479	11.2054	0.414517
-30	45.36	21.3019	7.88151	3.46873	11.6126	0.444764
-158	22.75	17.0161	7.69708	2.13088	9.9453	0.285126
-158	22.75	21.1019	7.84481	3.37932	11.4777	0.434972
-105	15.77	19.9919	7.69119	2.92598	10.8259	0.384052
-158	22.75	25.7818	9.33603	5.81801	15.6799	0.679164
-158	22.75	19.6219	7.65903	2.79238	10.6465	0.368558
-105	15.77	20.7619	7.7887	3.23251	11.2604	0.418727
-36.08	-30.08	27.2018	9.98061	6.54326	17.1642	0.740349
-8.32	43.42	19.2466	7.63614	2.66647	10.4847	0.353689
-158	22.75	18.1901	7.62382	2.36639	10.139	0.316803
-158	22.75	22.1419	8.06493	3.86658	12.2334	0.487505
-158	22.75	20.5919	7.76363	3.16166	11.1574	0.410808
-158	22.75	20.7919	7.79333	3.2452	11.2789	0.420139
-158	22.75	19.6019	7.65756	2.78542	10.6374	0.367743
-158	22.75	20.6919	7.77814	3.20313	11.2175	0.41545
-158	22.75	19.8619	7.6788	2.87799	10.7606	0.378517
-158	22.75	20.9919	7.82579	3.3311	11.4057	0.429659
-158	22.75	20.7319	7.78413	3.21988	11.2419	0.41732
-49.81	-36.06	18.2719	7.62207	2.38668	10.1599	0.319384
-158	22.75	19.9826	7.69026	2.92249	10.8211	0.383651
-158	22.75	19.6219	7.65903	2.79238	10.6465	0.368558
-158	22.75	19.9119	7.68343	2.89631	10.7854	0.380634
-158	22.75	20.7119	7.78112	3.21149	11.2297	0.416384
-158	22.75	18.9119	7.62398	2.56258	10.3575	0.341187
-158	22.75	21.0619	7.8378	3.36171	11.4514	0.433034
-53.3	-39.35	17.3619	7.66635	2.18939	9.98177	0.293398
-158	22.75	18.7065	7.62033	2.50285	10.2876	0.333885
-158	22.75	22.0219	8.03588	3.8077	12.1395	0.481261
-105	15.77	26.7719	9.78046	6.33348	16.7178	0.723534
-36.08	-30.08	27.6218	10.1788	6.73709	17.5934	0.755004
-49.81	-36.06	24.6166	8.85659	5.18092	14.4814	0.620062
-158	22.75	20.0626	7.69842	2.95253	10.8623	0.387101
-55.88	-48	21.0919	7.84305	3.37491	11.4711	0.434487
-158	22.75	4.82666	9.76989	2.94569	12.7181	0.337936
-158	22.75	20.0419	7.69627	2.94473	10.8516	0.386207
-8.87	42.18	26.7719	9.78046	6.33348	16.7178	0.723534
-43.42	-30.3	17.2273	7.67743	2.16553	9.96555	0.290072
-158	22.75	22.7532	8.22717	4.1757	12.7361	0.519849
-55.88	-48	18.1019	7.62621	2.34508	10.1175	0.314073
-158	22.75	4.81666	9.76771	2.94404	12.7143	0.337829
-30.66	-21.06	19.7019	7.66517	2.82048	10.6837	0.371839
-8.32	43.42	22.9907	8.29647	4.29947	12.942	0.532598
-102.35	17.68	18.0101	7.62925	2.32351	10.0964	0.311291
-158	22.75	22.2909	8.1023	3.94058	12.3522	0.495313
-8.32	43.42	20.4119	7.73927	3.08856	11.0528	0.402581
-19.82	35.87	17.8801	7.6345	2.29406	10.0685	0.307456
-102.35	17.68	24.7595	8.91229	5.25968	14.6254	0.627576
-19.82	35.87	21.3809	7.89676	3.50465	11.6673	0.448678
-154	-20.09	24.7595	8.91229	5.25968	14.6254	0.627576
-55.88	-48	18.5835	7.61952	2.46854	10.2486	0.329646
-8.77	42.36	4.47666	9.68354	2.87857	12.5643	0.333382
-8.79	42.23	16.4931	7.75736	2.05961	9.92203	0.27433

## Sheet: projections_SSP3-7.0
longitude	latitude	temperature	heterotrophic bacteria (µgC L-1)	autotrophic picoplankton (µgC L-1)	total picoplankton (µgC L-1)	ratio (AP:HB)
-30.68	9.56	30.4336	11.4812	7.58223	20.0326	0.788397
-47.3	-27.2	22.9938	8.29741	4.30111	12.9447	0.532767
-30.06	8.53	30.638	11.5676	7.60124	20.1623	0.785089
-20.02	41.49	20.1771	7.71088	2.99626	10.9229	0.392104
-30.06	8.53	30.648	11.5717	7.60198	20.1684	0.784903
-16.28	44.9	24.02	8.63468	4.85285	13.8934	0.588212
-100.56	-0.35	26.1113	9.48081	5.99351	16.0252	0.694682
12	-18.99	15.1643	7.97906	1.96953	10.0268	0.256172
-9.02	47.55	22.9452	8.28292	4.27559	12.9021	0.530148
-30.68	9.56	28.6336	10.6601	7.14572	18.5794	0.78158
-32.29	12.24	29.4983	11.065	7.41028	19.3387	0.792289
17.88	-32.24	11.0928	9.04898	2.35723	11.433	0.273266
-45.46	-25.42	17.6176	7.64848	2.23849	10.0197	0.300088
-32.29	12.24	29.3783	11.0096	7.37908	19.2392	0.791562
-63.73	40.68	22.086	8.05127	3.83905	12.1894	0.484589
-179.73	-34.37	22.8239	8.24745	4.21235	12.7968	0.523637
-136.63	-13.15	22.9285	8.27798	4.26685	12.8875	0.52925
-140.58	-9.11	30.1645	11.3646	7.54652	19.849	0.791349
179.45	-50.48	8.45053	9.71083	2.83515	12.5571	0.316396
-21.47	21.76	25.5943	9.2553	5.7169	15.4841	0.670059
-14.01	44.68	20.3156	7.72716	3.0503	10.9986	0.39825
-8.77	42.36	18.7043	7.6203	2.50221	10.2869	0.333806
66.49	18.57	29.7997	11.2022	7.47993	19.5787	0.79294
-29	5.98	31.1999	11.794	7.61462	20.4713	0.770933
-30	55.25	15.3899	7.93503	1.97587	9.99323	0.258326
-17.43	41.08	21.7304	7.96923	3.66739	11.9186	0.46627
-44.7	-27.4	22.1793	8.07416	3.88504	12.2629	0.489457
-44.7	-27.4	21.7793	7.98001	3.69063	11.9549	0.468764
-131.32	-11.28	23.3517	8.40825	4.49081	13.2653	0.552086
-45.4	-26.3	23.9097	8.59561	4.79253	13.7873	0.582262
-20	16.38	21.9174	8.01135	3.75696	12.0592	0.475858
-21.01	13.8	26.3959	9.60852	6.1422	16.324	0.707514
-98.93	0.23	25.6523	9.28012	5.74824	15.5446	0.672893
-85.28	5.12	21.0146	7.82964	3.34097	11.4204	0.430749
-25	-2.24	29.2942	10.9706	7.35609	19.1683	0.7909
110	-12.5	28.7795	10.7292	7.19649	18.7139	0.784238
-36.46	19.05	27.2404	9.99876	6.56159	17.204	0.741775
-113.53	-4.98	24.9946	9.00595	5.38916	14.8645	0.639809
-121.81	-7.93	23.9931	8.62508	4.83811	13.8674	0.58676
-30	55.25	15.3899	7.93503	1.97587	9.99323	0.258326
-30	55.25	15.3899	7.93503	1.97587	9.99323	0.258326
110	-12.5	28.7795	10.7292	7.19649	18.7139	0.784238
-14.01	44.68	18.8756	7.62312	2.55181	10.3447	0.339877
-85	5.22	22.136	8.06349	3.86369	12.2287	0.487199
-79.68	8.13	19.6187	7.65879	2.79127	10.6451	0.368428
-83.83	5.64	22.0954	8.05355	3.84367	12.1968	0.485079
-13.14	-2.12	24.0017	8.62814	4.84281	13.8757	0.587223
-20	16.38	21.9174	8.01135	3.75696	12.0592	0.475858
-12.27	46.18	23.4118	8.4276	4.523	13.3203	0.555339
177.53	-52.12	7.73857	9.82825	2.93749	12.7742	0.327046
-64.51	40.98	22.4256	8.1373	4.00824	12.4616	0.502417
-25	-10.6	29.1972	10.9255	7.32844	19.0852	0.789981
73.89	6.03	31.8839	12.0428	7.54591	20.7406	0.742768
-80.51	31.95	22.9694	8.29011	4.28827	12.9232	0.53145
170	-28.41	22.8595	8.25777	4.23088	12.8276	0.525547
-25	-10.6	29.2072	10.9301	7.33134	19.0938	0.790083
-14.06	46.49	15.2356	7.96488	1.97115	10.0155	0.256812
-45.5	-28.4	22.3664	8.12178	3.97842	12.4133	0.499291
-13.2	-1.37	25.3332	9.14498	5.57484	15.2129	0.657079
-58.12	40.8	22.7831	8.2357	4.19116	12.7617	0.521448
-28.21	-3.92	27.6859	10.2093	6.76562	17.6582	0.757073
-47.8	-30.7	22.7564	8.22809	4.17736	12.7388	0.520021
-83.95	5.6	22.2059	8.08081	3.89825	12.2841	0.490852
-25	-2.24	27.6742	10.2037	6.76044	17.6464	0.756699
-14.06	46.49	15.1756	7.9768	1.96976	10.0249	0.256271
-28.21	-3.92	25.3959	9.17125	5.60908	15.2779	0.660227
159.9	-18	27.2578	10.0069	6.5698	17.2219	0.742411
168.57	-26.14	21.9485	8.01857	3.77199	12.0829	0.477461
-20.42	35.67	19.713	7.66606	2.8244	10.6889	0.372296
-176.48	-10.33	30.3303	11.4368	7.56992	19.9638	0.789715
-25	-10.6	29.2072	10.9301	7.33134	19.0938	0.790083
179.58	57	6.17447	9.92608	3.04798	12.9786	0.341782
-107.22	-2.73	25.1881	9.08483	5.49544	15.0631	0.649735
-21.56	22.17	26.0829	9.46822	5.97854	15.9955	0.693373
66.53	18.57	29.8097	11.2068	7.48202	19.5864	0.792932
-93.28	2.25	22.8013	8.24092	4.2006	12.7773	0.522423
-100.27	-0.23	26.0387	9.44865	5.95517	15.9491	0.691324
-95.4	1.44	23.6875	8.51893	4.67164	13.5763	0.570254
-25	-10.6	29.2072	10.9301	7.33134	19.0938	0.790083
164.59	-19.22	28.3305	10.5161	7.0332	18.2931	0.775055
-130	-10.81	23.6979	8.52246	4.67729	13.5861	0.570817
-32.57	24.33	26.5897	9.69672	6.2416	16.5272	0.715913
-86.25	4.77	22.0725	8.04802	3.83245	12.1789	0.483889
-6.17	-2.81	17.8826	7.63439	2.29461	10.069	0.307528
110	-11.5	29.0366	10.8503	7.28014	18.945	0.78811
-21.01	13.8	24.8959	8.96632	5.33482	14.7638	0.634693
-84.52	2.08	29.5758	11.1005	7.42939	19.4017	0.792619
12	-18.99	24.4043	8.7756	5.06392	14.2696	0.608804
167.9	-25.05	21.3538	7.89147	3.49226	11.6484	0.44733
-30	55.25	15.3999	7.93314	1.97624	9.99189	0.25843
71.64	0	31.778	12.0064	7.56313	20.7073	0.74797
-30	50.84	17.1906	7.68064	2.15927	9.96158	0.28919
-132.46	-11.68	23.3319	8.40192	4.48023	13.2472	0.551015
-99.2	0.13	25.8923	9.38419	5.87722	15.7956	0.684441
159.9	-18	28.2578	10.4815	7.00485	18.223	0.773296
-33.61	14.43	27.9926	10.3552	6.89737	17.9641	0.766285
-23.63	6.08	30.3858	11.4607	7.57676	20.001	0.789036
0.6	-8.62	23.5932	8.48721	4.62062	13.488	0.565153
-158	22.75	30.0076	11.2954	7.52036	19.7356	0.792364
-74.46	37.66	22.4647	8.14766	4.028	12.4938	0.504485
-45.5	-28.4	22.5664	8.17512	4.07975	12.5782	0.509887
-47.6	-30.8	20.8564	7.8035	3.27264	11.3192	0.423189
-30	50.84	17.1006	7.68888	2.14434	9.95265	0.287066
159.9	-18	27.3878	10.0682	6.6306	17.3553	0.747071
179.55	50	8.16477	9.76242	2.87902	12.6514	0.320858
-76.03	34.3	21.9277	8.01373	3.76193	12.0671	0.476388
-93	2.36	23.4113	8.42741	4.52269	13.3197	0.555307
-46.62	-33.39	19.0507	7.62808	2.60468	10.4083	0.346282
-28.95	43.88	23.9546	8.61144	4.81708	13.8304	0.584686
110	-11.5	29.0966	10.8785	7.29855	18.9977	0.78886
-47.1	-27.7	23.454	8.44128	4.54562	13.359	0.557619
-90.71	3.17	22.389	8.12766	3.98976	12.4317	0.50048
-21.01	13.8	28.3359	10.5186	7.03527	18.2982	0.775181
-30	61.91	13.1574	8.46093	2.05777	10.5665	0.252647
110	-11.5	29.0366	10.8503	7.28014	18.945	0.78811
-46.6	-27.9	22.9361	8.28025	4.27087	12.8942	0.529663
-179	58.9	7.40136	9.86981	2.97665	12.8539	0.331429
12	-18.99	13.9543	8.25278	1.99352	10.3048	0.250826
-79.94	31.1	22.481	8.15201	4.03626	12.5072	0.505348
-142.56	-8.91	30.487	11.504	7.58789	20.0673	0.787623
14.32	-24.75	19.3665	7.64239	2.70562	10.5342	0.358343
-170.72	-18.17	25.0742	9.0382	5.43292	14.946	0.643909
-158	22.75	28.5676	10.6288	7.12202	18.5178	0.780273
-62.85	41.1	22.3039	8.10562	3.94707	12.3626	0.495996
-30	59.35	13.1827	8.45405	2.0552	10.5573	0.252529
-51.58	42.05	22.6267	8.19169	4.1106	12.6288	0.513097
-19.87	29.18	25.7045	9.30258	5.77641	15.5991	0.675432
-6.17	-2.81	16.2026	7.79774	2.02889	9.9253	0.269226
14.32	-24.75	16.7965	7.7204	2.09844	9.93091	0.280342
-19.17	44.46	23.8001	8.55746	4.73281	13.6828	0.576343
-25	-2.24	28.8942	10.7834	7.23475	18.818	0.786096
0.61	-8.63	18.2832	7.62187	2.38952	10.1629	0.319743
-131.17	-11.22	23.3017	8.39231	4.4641	13.2198	0.549382
-13.2	-1.37	24.8732	8.95729	5.32234	14.7407	0.633515
-47.3	-27.2	23.3938	8.42178	4.51335	13.3038	0.554364
69.98	14.6	31.7689	12.0033	7.56448	20.7043	0.748398
-138.07	-13.65	22.7943	8.23892	4.19698	12.7713	0.522049
-13.2	-1.37	25.2632	9.11586	5.53657	15.1405	0.653547
164.59	-19.22	28.5005	10.597	7.09746	18.4548	0.778878
4.69	-31.03	17.6407	7.64707	2.24316	10.0236	0.300715
-22.94	7.58	30.37	11.4539	7.57486	19.9904	0.789237
-110.45	-3.88	25.0871	9.04344	5.43998	14.9592	0.644568
-95.07	1.61	23.2048	8.36184	4.4125	13.1322	0.544144
-6.17	-2.81	23.6926	8.52067	4.67443	13.5812	0.570532
-84.59	-2.01	28.2204	10.4636	6.99006	18.1868	0.772363
-12.85	-2.14	23.6729	8.51401	4.66377	13.5627	0.569468
-158	22.75	29.3276	10.9861	7.36532	19.1965	0.791178
-13.14	-2.12	21.1517	7.85369	3.40136	11.5108	0.437393
-30	59.35	13.1827	8.45405	2.0552	10.5573	0.252529
16.45	-29.52	17.5962	7.64981	2.23418	10.0162	0.299508
-30	53.56	15.2787	7.95643	1.9723	10.009	0.257217
-90.35	3.31	22.913	8.27342	4.25877	12.874	0.528418
-73.23	40.48	22.2583	8.09401	3.92432	12.326	0.493601
-15.45	29.18	24.3164	8.7427	5.01551	14.1827	0.604113
-14.06	46.49	15.2656	7.95899	1.97194	10.0109	0.257093
-158	22.75	28.6876	10.6857	7.16478	18.6294	0.782601
-20	16.38	18.4774	7.61965	2.43987	10.2169	0.326077
0.61	-8.63	23.2232	8.36757	4.42227	13.1488	0.545137
-53.3	-39.35	16.961	7.70265	2.12241	9.94106	0.283893
0.6	-8.62	19.3832	7.64334	2.71114	10.5412	0.358997
-32.57	24.33	26.5497	9.67844	6.22122	16.4853	0.714203
38.24	21.98	31.4419	11.8857	7.60155	20.5809	0.762406
-33.61	14.43	28.3826	10.5409	7.05319	18.3429	0.776269
110	-20	25.9955	9.42956	5.93223	15.9038	0.689307
-132.65	-11.75	23.3019	8.39238	4.46421	13.22	0.549393
-32.57	24.33	26.7197	9.75639	6.30732	16.6632	0.721378
-47.1	-30.6	21.6564	7.9532	3.63241	11.8641	0.462508
-54.4	-43.48	11.8276	8.83689	2.23344	11.1035	0.263716
-77.35	33.45	21.8908	8.0052	3.74408	12.0389	0.474484
-12.72	-1.36	23.6267	8.49843	4.63875	13.5194	0.566967
-36.04	42.23	22.76	8.2291	4.1792	12.7419	0.520211
-158	22.75	28.8676	10.7708	7.226	18.794	0.785683
-123.07	-8.38	23.8131	8.56196	4.73991	13.6952	0.577048
-45.5	-26.2	24.1281	8.67355	4.91207	13.9982	0.594025
-29.76	-7.48	30.2987	11.4231	7.56581	19.9423	0.790072
-33.61	14.43	28.3826	10.5409	7.05319	18.3429	0.776269
-14.06	46.49	15.2456	7.96292	1.9714	10.014	0.256905
-45.7	-25.9	23.1694	8.35084	4.39371	13.1005	0.542231
47.46	-11.64	27.5727	10.1556	6.71509	17.5437	0.75339
110	-18.5	26.3887	9.60528	6.1385	16.3165	0.707198
-30	59.35	13.1927	8.45134	2.05419	10.5537	0.252483
-30	53.56	15.3087	7.9506	1.97318	10.0046	0.257507
-102.35	17.68	21.9484	8.01855	3.77195	12.0829	0.477456
110	-21.5	24.8345	8.94191	5.30103	14.7014	0.631499
-55.94	-47.62	10.0568	9.33695	2.54833	11.9046	0.289454
-29.02	17.87	28.5665	10.6283	7.12161	18.5168	0.78025
-74.91	35.08	22.2683	8.09654	3.9293	12.334	0.494126
-127.03	-9.78	23.4515	8.44048	4.5443	13.3567	0.557486
-45.51	40.99	22.6676	8.20303	4.13155	12.6633	0.515273
-2.63	-5.86	19.0525	7.62815	2.60525	10.409	0.346351
164.59	-19.22	28.0705	10.3923	6.92961	18.0408	0.76844
-170.74	-18.18	24.9742	8.99773	5.37794	14.8436	0.638755
159.9	-18	27.8778	10.3005	6.84893	17.8503	0.762969
-69.88	40.55	23.1553	8.34649	4.38626	13.0879	0.541472
-45.85	-24.67	15.0097	8.0106	1.96722	10.0532	0.254911
-8.36	43.37	21.2696	7.8754	3.45415	11.5905	0.443173
-32.57	24.33	26.7097	9.75178	6.30229	16.6528	0.720963
-8.77	42.36	18.9043	7.62379	2.56031	10.3548	0.340911
-134.02	-12.23	23.1874	8.35641	4.40325	13.1166	0.543203
-158	22.75	29.2376	10.9443	7.34011	19.1199	0.790384
-170.74	-18.18	23.6042	8.49089	4.62658	13.4983	0.56575
-158	22.75	29.3176	10.9815	7.36257	19.1881	0.791096
110	-14	28.4737	10.5842	7.08752	18.4294	0.778302
177.33	28	22.7404	8.22355	4.16911	12.7252	0.519167
-22.87	32.68	22.569	8.17582	4.08106	12.5804	0.510023
-20	16.38	21.0674	7.83876	3.36413	11.455	0.433301
-106.8	-2.58	25.1575	9.07225	5.47865	15.0316	0.648174
-22.87	32.68	23.599	8.48916	4.62377	13.4935	0.565469
-15.35	2.16	26.4109	9.6153	6.14994	16.3397	0.708174
-29.01	-5.14	29.9907	11.2879	7.51732	19.7231	0.792443
-158	22.75	28.5776	10.6336	7.12564	18.5272	0.780475
-158	22.75	29.7976	11.2013	7.4795	19.5771	0.792941
-45.7	-25.9	23.5694	8.47928	4.60777	13.4659	0.563865
-25	-21.63	27.9694	10.3441	6.88768	17.9412	0.765628
-158	22.75	29.3376	10.9908	7.36806	19.205	0.791257
176.38	-20.71	27.3143	10.0335	6.59637	17.28	0.744459
-158	22.75	30.5676	11.538	7.59551	20.1186	0.786335
-21.01	13.8	28.4059	10.552	7.06203	18.3651	0.7768
-2.63	-5.86	18.2225	7.62308	2.37438	10.1472	0.31782
-158	22.75	28.5576	10.6241	7.11839	18.5084	0.780069
-45.46	-25.42	19.9576	7.68781	2.9132	10.8084	0.382582
-158	22.75	26.6076	9.70492	6.2507	16.546	0.716674
110	-38	14.0291	8.23424	1.98936	10.2832	0.250864
-22.8	43.99	23.8285	8.56728	4.74827	13.7098	0.577878
-20	39.9	17.515	7.65515	2.2182	10.0034	0.297346
110	-14	28.4737	10.5842	7.08752	18.4294	0.778302
-20.02	41.49	17.1671	7.68275	2.15531	9.95914	0.288629
-14.05	43.92	19.4646	7.64824	2.73841	10.5762	0.362219
-46.9	-31.1	19.8151	7.67463	2.86098	10.7377	0.376547
110	-38	14.0691	8.2244	1.98726	10.2719	0.250899
-36.46	19.05	27.7604	10.2447	6.7983	17.733	0.759413
-158	22.75	28.9476	10.8085	7.25205	18.8659	0.78689
-2.63	-5.86	15.4525	7.92324	1.97827	9.98502	0.258991
14.32	-24.75	17.3665	7.66599	2.19023	9.98236	0.293514
-158	22.75	27.1876	9.97398	6.53653	17.1496	0.739824
110	-14	28.4637	10.5795	7.08379	18.42	0.778085
110	-21.5	25.2545	9.11225	5.53181	15.1316	0.653107
-12.85	-2.14	18.2329	7.62285	2.37695	10.1498	0.318148
-158	22.75	26.8076	9.79694	6.35129	16.755	0.724994
-8.1	48.75	13.6129	8.33973	2.01673	10.4102	0.251117
-175.67	-19.99	25.2134	9.09524	5.50928	15.0891	0.651019
-87.43	4.35	22.2198	8.08429	3.90514	12.2951	0.49158
-30	59.35	13.1827	8.45405	2.0552	10.5573	0.252529
-17.43	41.08	16.3904	7.77109	2.04803	9.92189	0.272453
-82.75	6.02	21.2564	7.87291	3.44818	11.5815	0.44252
-104	-1.58	25.3801	9.16461	5.60046	15.2615	0.659435
-139.71	-14.15	22.8489	8.25469	4.22536	12.8184	0.524979
110	-20	25.9155	9.39438	5.88964	15.8199	0.685543
-158	22.75	29.1176	10.8883	7.3049	19.0161	0.789109
-158	22.75	29.6976	11.156	7.45777	19.499	0.792912
-25.99	-28.79	21.1163	7.84736	3.38567	11.4872	0.43567
-127.69	35.42	16.7688	7.72355	2.09461	9.92957	0.279765
110	-14	28.4637	10.5795	7.08379	18.42	0.778085
-21.22	17.79	26.9304	9.85386	6.41203	16.883	0.729932
-35.52	-19.91	26.3823	9.60235	6.13515	16.3097	0.706913
-8.44	43.42	16.8292	7.71674	2.10305	9.93262	0.281032
110	-38	13.9391	8.25659	1.99442	10.3093	0.250823
-30	53.56	15.2987	7.95254	1.97288	10.006	0.25741
-123.02	-8.35	23.8831	8.58631	4.77805	13.7619	0.580829
-27.2	44.02	24.1451	8.67971	4.92139	14.0148	0.594937
-46.01	-24.36	19.7295	7.66739	2.83027	10.6967	0.37298
176.38	-20.71	26.9543	9.86498	6.42376	16.9079	0.730877
174.27	-20.75	28.1748	10.4419	6.97189	18.1426	0.771201
-77.41	13.93	22.477	8.15095	4.03424	12.5039	0.505137
-128.33	-10.23	23.6614	8.5101	4.65751	13.5518	0.568843
-94.43	1.83	24.4548	8.79467	5.09173	14.3198	0.61149
170.72	-29.54	22.9856	8.29494	4.29677	12.9375	0.532321
-21.01	13.8	27.7259	10.2283	6.7832	17.6983	0.758336
-28.95	43.17	23.5824	8.48362	4.6148	13.478	0.56457
-158	22.75	28.8976	10.785	7.23585	18.821	0.786148
-158	22.75	29.8576	11.2283	7.49184	19.6231	0.792865
179.55	50	7.93477	9.79969	2.91171	12.7206	0.324277
-158	22.75	26.6176	9.7095	6.25577	16.5564	0.717098
-158	22.75	28.7676	10.7236	7.19243	18.703	0.784033
-158	22.75	27.8276	10.2766	6.82743	17.8003	0.76147
-46.2	-28.1	23.0361	8.31012	4.32334	12.982	0.535045
-141.96	-15.15	22.4499	8.14374	4.02054	12.4816	0.503704
0.6	-8.62	19.4832	7.64943	2.74469	10.5843	0.362959
-30	53.56	15.2787	7.95643	1.9723	10.009	0.257217
-158	22.75	30.9576	11.6985	7.61611	20.3471	0.777978
-112.23	-4.51	25.1116	9.05346	5.45347	14.9844	0.645828
34.83	27.16	27.7122	10.2218	6.77719	17.6846	0.757906
-34.9	22.23	27.146	9.95449	6.51667	17.1066	0.738268
-140.71	-14.63	22.6432	8.19624	4.11901	12.6426	0.513972
-43.29	-30.14	18.9619	7.6253	2.57759	10.3755	0.343008
-109.55	-3.56	25.0782	9.03982	5.4351	14.9501	0.644113
110	-15.5	27.3665	10.0581	6.6207	17.3335	0.746319
-36.46	19.05	27.7904	10.2589	6.81134	17.7631	0.760338
47.49	-11.8	27.6403	10.1877	6.74539	17.6122	0.755608
-172.81	-19.5	25.6845	9.29398	5.76565	15.5782	0.674463
-114.23	-5.58	24.8319	8.94088	5.2996	14.6988	0.631364
110	-39.5	12.3469	8.68747	2.15612	10.882	0.258324
47.42	-11.74	27.3727	10.061	6.6236	17.3399	0.74654
-158	22.75	29.8676	11.2328	7.49385	19.6308	0.792846
-158	22.75	29.2576	10.9536	7.3458	19.1371	0.790572
-158	22.75	29.4676	11.0508	7.40247	19.3134	0.792128
-175.67	-19.99	24.5034	8.81313	5.1185	14.3681	0.61407
-10.8	46.78	23.2931	8.38958	4.4595	13.212	0.548916
-25	-2.24	27.6542	10.1943	6.75157	17.6262	0.756057
-8.44	43.42	17.8292	7.63686	2.28288	10.0583	0.305989
-33.93	43.48	23.4828	8.45071	4.56113	13.3856	0.55918
-158	22.75	27.8876	10.3052	6.85312	17.8601	0.76326
110	-20	25.8655	9.3725	5.86292	15.7675	0.683171
-158	22.75	27.8276	10.2766	6.82743	17.8003	0.76147
-13.98	48.06	16.3818	7.77226	2.0471	9.92194	0.272299
-47.1	-27.7	23.354	8.40897	4.49201	13.2673	0.552208
-158	22.75	29.8876	11.2418	7.49782	19.6459	0.792801
-35.83	18.04	27.5366	10.1385	6.69879	17.5071	0.752186
-47.1	-27.8	23.3877	8.41981	4.51007	13.2982	0.554033
-32.38	43.6	23.5936	8.48734	4.62083	13.4884	0.565174
-91.32	2.96	22.539	8.16764	4.06574	12.5553	0.508426
172.12	-21.37	28.4379	10.5672	7.07413	18.3955	0.777518
-35.8	21.41	27.1127	9.93889	6.50069	17.0722	0.737009
-25.63	1.9	15.6051	7.89534	1.98527	9.96705	0.260731
-75.99	34.33	22.1177	8.059	3.85467	12.2143	0.486243
-21.93	10.06	30.4926	11.5063	7.58845	20.0709	0.787539
-158	22.75	29.1876	10.921	7.32565	19.0769	0.789882
-158	22.75	29.2576	10.9536	7.3458	19.1371	0.790572
-34.23	42.46	22.9448	8.28282	4.27542	12.9018	0.53013
-49.59	-35.71	14.2973	8.16933	1.97719	10.2102	0.251308
-65.43	40.64	22.8045	8.24184	4.20226	12.78	0.522594
37.22	23.36	29.4042	11.0216	7.38596	19.2608	0.791741
-26.27	24.78	28.8944	10.7835	7.2348	18.8181	0.786098
-91.58	2.87	23.005	8.30075	4.30696	12.9545	0.533367
110	-39.5	12.3469	8.68747	2.15612	10.882	0.258324
110	-17	26.9443	9.86032	6.41885	16.8974	0.730482
-135.48	-12.75	23.0213	8.30565	4.31555	12.9689	0.534247
110	-17	26.9643	9.86962	6.42865	16.9182	0.731271
-21.93	10.06	30.2126	11.3857	7.55376	19.8828	0.790936
178.64	-20.97	26.8976	9.83864	6.39589	16.8489	0.728627
-102.94	6.33	31.5151	11.9127	7.59523	20.6111	0.759522
110	-21.5	25.3345	9.14553	5.57556	15.2143	0.657145
-158	22.75	26.2376	9.53722	6.05989	16.1579	0.700448
-158	22.75	28.1676	10.4385	6.96901	18.1356	0.771016
-30	53.56	14.0987	8.21716	1.98578	10.2636	0.250933
172.12	-21.37	28.4379	10.5672	7.07413	18.3955	0.777518
-34.83	-31.16	14.5517	8.11026	1.96983	10.1478	0.252184
-10.56	46.9	23.0431	8.31222	4.32701	12.9881	0.53542
-158	22.75	27.8876	10.3052	6.85312	17.8601	0.76326
-158	22.75	28.9476	10.8085	7.25205	18.8659	0.78689
-158	22.75	26.0176	9.43931	5.94396	15.927	0.690339
-158	22.75	29.3876	11.0139	7.38156	19.247	0.791628
-170.83	-18.25	24.3442	8.75307	5.03083	14.2102	0.605599
-158	22.75	29.1876	10.921	7.32565	19.0769	0.789882
-54.4	-43.48	11.8576	8.82822	2.22872	11.0904	0.263372
-90.22	3.35	22.553	8.17145	4.07288	12.567	0.509171
110	-17	26.9743	9.87428	6.43355	16.9286	0.731664
-92.05	2.7	22.4664	8.14812	4.02886	12.4952	0.504575
162.12	-18.62	27.0643	9.91625	6.47733	17.022	0.73516
-158	22.75	27.8676	10.2957	6.84459	17.8402	0.762668
-25.63	1.9	16.5551	7.74937	2.06698	9.92282	0.275502
-158	22.75	29.1876	10.921	7.32565	19.0769	0.789882
-108.23	-3.08	25.1492	9.06882	5.47407	15.023	0.647748
-30	49.44	18.9379	7.62464	2.57037	10.3668	0.342133
-158	22.75	30.1476	11.3572	7.54389	19.837	0.791483
178.64	-20.97	26.9076	9.84328	6.40082	16.8593	0.729026
53.99	-16.96	28.4959	10.5948	7.09577	18.4504	0.77878
-158	22.75	29.1876	10.921	7.32565	19.0769	0.789882
-30	50.84	17.2706	7.67374	2.17306	9.97049	0.291128
172.12	-21.37	28.6279	10.6575	7.14371	18.5741	0.78147
-158	22.75	29.8176	11.2103	7.48367	19.5925	0.792924
-46.66	42.45	22.5495	8.17051	4.07112	12.5641	0.508988
-35.8	21.41	27.1127	9.93889	6.50069	17.0722	0.737009
-15.35	2.16	26.4509	9.63345	6.17056	16.3817	0.709926
-21.93	10.06	31.1426	11.7717	7.616	20.4432	0.772733
-158	22.75	26.5876	9.69576	6.24053	16.525	0.715823
-71.7	40.51	22.8703	8.26091	4.2365	12.8369	0.526126
-136.73	-13.07	23.0315	8.30871	4.32089	12.9779	0.534794
14.32	-24.75	17.9365	7.63209	2.30668	10.0803	0.309105
-126.8	-9.7	23.5715	8.47999	4.60893	13.4679	0.563981
-54.73	-43.43	7.44702	9.86476	2.97176	12.8441	0.330866
110	-15.5	27.3865	10.0675	6.62999	17.3539	0.747025
-158	22.75	29.7976	11.2013	7.4795	19.5771	0.792941
-153.68	0	32.7052	12.2926	7.32276	20.8814	0.691129
47.42	-11.74	27.1727	9.96698	6.52942	17.1342	0.739268
-158	22.75	30.3176	11.4313	7.56829	19.9552	0.789861
178.64	-20.97	26.6176	9.7095	6.25578	16.5564	0.717098
4.14	-11.62	22.7815	8.23525	4.19036	12.7603	0.521365
-158	22.75	29.5176	11.0738	7.41511	19.3544	0.792382
-158	22.75	30.3176	11.4313	7.56829	19.9552	0.789861
43.29	-15.34	28.0508	10.3829	6.9215	18.0214	0.767902
-21	21.95	25.8143	9.35018	5.8355	15.7139	0.680727
-158	22.75	28.6576	10.6715	7.15423	18.6017	0.782039
-21.71	33.62	21.3397	7.88875	3.48586	11.6387	0.446633
-21.93	10.06	30.7926	11.6316	7.61075	20.2545	0.781952
-178.51	-20.45	26.9428	9.85963	6.41812	16.8959	0.730423
-158	22.75	29.5976	11.1105	7.43462	19.4193	0.792692
-25	-21.63	27.9694	10.3441	6.88768	17.9412	0.765628
-13.85	45.48	23.5086	8.45917	4.575	13.4094	0.560575
-25.72	30.29	23.4391	8.43643	4.53761	13.3453	0.556812
-32.57	24.33	26.6997	9.74718	6.29726	16.6423	0.720547
-158	22.75	29.2076	10.9303	7.33147	19.0942	0.790088
-46.9	-28	23.5877	8.48539	4.61767	13.4829	0.564857
4.69	-31.03	17.6807	7.64471	2.25136	10.0305	0.301812
-35.83	18.04	27.8366	10.2809	6.8313	17.8092	0.761741
-134.05	-12.23	23.1674	8.35021	4.39265	13.0987	0.542123
-158	22.75	29.3876	11.0139	7.38156	19.247	0.791628
162.12	-18.62	27.5843	10.1611	6.72031	17.5555	0.753774
-24.61	43.75	23.7806	8.55073	4.72219	13.6642	0.575288
-29	-16.61	29.7954	11.2003	7.47904	19.5754	0.792943
-54.4	-43.48	11.8776	8.82244	2.22558	11.0817	0.263144
-178.51	-20.45	27.0628	9.91555	6.4766	17.0205	0.735102
110	-15.5	27.3565	10.0534	6.61605	17.3232	0.745964
-158	22.75	25.6876	9.29532	5.76733	15.5815	0.674614
-132.38	-11.66	23.2319	8.37031	4.42692	13.1567	0.545609
-172.81	-19.5	26.4745	9.64418	6.18271	16.4065	0.710955
-98.03	0.55	25.3756	9.16273	5.598	15.2568	0.65921
-175.67	-19.99	26.0934	9.47287	5.98407	16.0065	0.693857
-34.9	22.23	27.286	10.0202	6.58311	17.2509	0.743439
-158	22.75	28.7976	10.7378	7.20262	18.7304	0.784545
110	-15.5	27.3565	10.0534	6.61605	17.3232	0.745964
-178.51	-20.45	27.0828	9.9249	6.48627	17.0412	0.735869
-8.89	42.17	18.2365	7.62278	2.37784	10.1507	0.31826
-54.91	40.82	23.0802	8.32348	4.34657	13.021	0.537421
-109.2	-3.39	25.0727	9.03758	5.43207	14.9444	0.64383
47.51	-11.81	27.4403	10.093	6.65486	17.409	0.748905
110	-27.5	21.5824	7.93754	3.59771	11.8104	0.458765
162.12	-18.62	27.5543	10.1469	6.70679	17.525	0.752778
-55.94	-47.62	9.64676	9.44323	2.62518	12.0853	0.296358
162.12	-18.62	27.5643	10.1516	6.7113	17.5352	0.753112
-158	22.75	28.6076	10.6478	7.13644	18.5552	0.781073
-158	22.75	26.9276	9.85256	6.41066	16.8801	0.729821
-158	22.75	27.1176	9.94118	6.50303	17.0772	0.737194
-158	22.75	25.7976	9.34291	5.82653	15.6965	0.679926
-13.98	48.06	16.4118	7.76818	2.05038	9.9218	0.272837
-21.26	30.91	22.0539	8.04353	3.82332	12.1644	0.48292
-158	22.75	27.7176	10.2243	6.77957	17.69	0.758076
-158	22.75	28.8776	10.7756	7.2293	18.803	0.78584
-158	22.75	26.9276	9.85256	6.41066	16.8801	0.729821
-26.47	-0.13	29.2958	10.9713	7.35652	19.1696	0.790913
-117.83	-6.51	24.2258	8.70922	4.96572	14.0937	0.599268
-158	22.75	28.2176	10.4623	6.98897	18.1842	0.772293
-24.41	29.18	25.8806	9.37909	5.87099	15.7833	0.683888
-111.02	-4.08	25.1361	9.06346	5.46689	15.0095	0.647079
-158	22.75	29.2276	10.9396	7.33724	19.1114	0.790287
-46.01	-24.36	15.5295	7.90902	1.98159	9.97559	0.259847
-17.43	41.08	26.3704	9.597	6.12902	16.2973	0.706389
-35.83	18.04	27.8366	10.2809	6.8313	17.8092	0.761741
-31.46	-11.24	30.1692	11.3667	7.54725	19.8523	0.791311
-19.71	44.61	24.3107	8.74061	5.01242	14.1771	0.603812
162.12	-18.62	27.5943	10.1658	6.7248	17.5656	0.754104
-178.51	-20.45	25.8328	9.35823	5.8454	15.7333	0.681611
-94	2	22.9534	8.28535	4.27989	12.9092	0.53059
-21.56	22.17	26.0729	9.46379	5.97325	15.985	0.69291
4.14	-11.62	15.1315	7.98566	1.9689	10.0321	0.25589
-36.46	19.05	27.8004	10.2637	6.81568	17.7731	0.760644
-158	22.75	27.6776	10.2053	6.76193	17.6498	0.756807
-158	22.75	28.8776	10.7756	7.2293	18.803	0.78584
-35.2	-20.94	24.1609	8.68546	4.93005	14.0302	0.595784
-158	22.75	29.5676	11.0967	7.4274	19.3951	0.79259
-175.67	-19.99	26.0734	9.46399	5.9735	15.9855	0.692932
-35.83	18.04	27.8366	10.2809	6.8313	17.8092	0.761741
-116.61	-6.08	24.4698	8.80036	5.10001	14.3347	0.612289
110	-26	23.1592	8.34767	4.38829	13.0913	0.541679
110	-23	24.6356	8.86393	5.19137	14.5005	0.621063
110	-15.5	27.3865	10.0675	6.62999	17.3539	0.747025
-8.77	42.36	18.4743	7.61967	2.43903	10.2159	0.325972
-21.71	33.62	23.9897	8.62388	4.83626	13.8642	0.586578
-25	-24.88	23.8565	8.57702	4.76354	13.7365	0.579392
-8.44	43.42	20.7292	7.78373	3.21876	11.2403	0.417194
-26.47	-0.13	29.0158	10.8406	7.27365	18.9266	0.787837
-158	22.75	29.1676	10.9117	7.31979	19.0596	0.78967
110	-26	22.6592	8.20069	4.12723	12.6562	0.514825
-158	22.75	28.6576	10.6715	7.15423	18.6017	0.782039
-158	22.75	26.8976	9.83863	6.39589	16.8489	0.728626
-45	-28.7	22.3664	8.12178	3.97842	12.4133	0.499291
-29	-9.09	30.2406	11.3979	7.55781	19.9023	0.790672
-19.56	44.63	23.9907	8.62425	4.83684	13.8652	0.586634
-158	22.75	29.8376	11.2193	7.48779	19.6079	0.792899
-158	22.75	27.4276	10.087	6.649	17.396	0.748464
-158	22.75	27.0576	9.91313	6.47409	17.0151	0.734903
-125.75	-9.32	23.6531	8.5073	4.65301	13.544	0.568393
-35.8	21.41	27.1127	9.93889	6.50069	17.0722	0.737009
173.26	-33.44	22.6785	8.2061	4.13719	12.6726	0.515859
110	-27.5	21.4624	7.91292	3.54202	11.7246	0.452739
-153.68	0	32.6952	12.2899	7.32648	20.881	0.691884
-8.1	48.75	13.6229	8.33714	2.01595	10.4069	0.251098
110	-11.5	28.5966	10.6426	7.13248	18.5449	0.780855
-172.81	-19.5	23.8445	8.57284	4.75699	13.725	0.578743
-8.92	42.26	18.5943	7.61955	2.47151	10.252	0.330014
-57.27	41.56	22.7542	8.22745	4.17621	12.7369	0.519901
-32.57	24.33	26.7097	9.75178	6.30229	16.6528	0.720963
-24.99	-20.49	28.1897	10.449	6.97787	18.1571	0.771585
-158	22.75	27.7776	10.2528	6.80579	17.7503	0.759945
-158	22.75	29.4276	11.0324	7.39212	19.2803	0.791892
-158	22.75	26.8276	9.80619	6.36123	16.7759	0.725807
-8.77	42.36	18.8543	7.62266	2.54551	10.3373	0.33911
-158	22.75	28.5676	10.6288	7.12202	18.5178	0.780273
-158	22.75	26.0176	9.43931	5.94396	15.927	0.690339
-158	22.75	27.9876	10.3528	6.89529	17.9591	0.766144
-158	22.75	29.5376	11.083	7.42007	19.3707	0.79247
-49.82	-35.65	17.6403	7.64709	2.24309	10.0235	0.300705
-8.5	43.45	17.9492	7.63157	2.30956	10.083	0.30948
-21.71	33.62	23.8997	8.59211	4.7871	13.7777	0.581724
4.14	-11.62	16.0515	7.82061	2.01539	9.93147	0.266824
-8.1	48.75	13.6129	8.33973	2.01673	10.4102	0.251117
-20	47.01	18.914	7.62403	2.5632	10.3583	0.341262
-92.68	2.46	22.5942	8.18272	4.09393	12.6015	0.511363
-158	22.75	26.4576	9.63651	6.17403	16.3887	0.71022
-158	22.75	29.4676	11.0508	7.40247	19.3134	0.792128
-21.22	17.79	27.3104	10.0317	6.59454	17.276	0.744318
-37.26	35.91	19.5791	7.65592	2.77753	10.6271	0.366819
165	-19.5	27.6324	10.1839	6.74186	17.6042	0.755351
176.38	-20.71	26.5243	9.66686	6.20824	16.4587	0.713111
-158	22.75	26.8476	9.81545	6.37116	16.7968	0.726617
-12.77	3.07	21.5866	7.93841	3.59965	11.8134	0.458975
-46.12	-32.8	17.7343	7.64171	2.26255	10.0402	0.303302
-21.06	11.74	29.9969	11.2906	7.51845	19.7277	0.792414
-158	22.75	27.9576	10.3385	6.88273	17.9295	0.765292
-158	22.75	25.9076	9.39091	5.88542	15.8116	0.685169
-8.77	42.36	18.2643	7.62222	2.38477	10.1579	0.319141
-55.6	-47.59	7.21333	9.88854	2.99532	12.8908	0.333634
47.49	-11.8	27.5403	10.1403	6.70049	17.5109	0.752312
-158	22.75	28.6176	10.6526	7.14002	18.5645	0.781269
-20	47.01	17.464	7.65872	2.20839	9.99579	0.29601
165	-19.5	27.6224	10.1792	6.73739	17.5941	0.755025
-25	-13.93	26.0167	9.43889	5.94346	15.926	0.690295
-158	22.75	29.2076	10.9303	7.33147	19.0942	0.790088
-158	22.75	26.4376	9.62743	6.16373	16.3678	0.709346
-158	22.75	29.1776	10.9163	7.32273	19.0683	0.789777
-26.47	-0.13	29.2958	10.9713	7.35652	19.1696	0.790913
-158	22.75	30.8276	11.6459	7.61231	20.2747	0.781163
-2.63	-5.86	18.1725	7.62426	2.3621	10.1346	0.316255
-158	22.75	27.4276	10.087	6.649	17.396	0.748464
-158	22.75	28.3576	10.529	7.04363	18.319	0.775691
-25.72	30.29	24.6291	8.86141	5.18778	14.4939	0.620719
-158	22.75	26.4376	9.62743	6.16373	16.3678	0.709346
110	-30.5	20.4492	7.74413	3.10355	11.0741	0.404273
-53.86	41.85	22.8975	8.26888	4.2507	12.8605	0.527588
4.14	-11.62	21.1515	7.85366	3.40129	11.5107	0.437385
-158	22.75	28.6076	10.6478	7.13644	18.5552	0.781073
-158	22.75	29.2676	10.9583	7.34863	19.1456	0.790664
110	-30.5	20.4392	7.74282	3.09952	11.0684	0.403819
-158	22.75	26.5776	9.69119	6.23545	16.5145	0.715397
-158	22.75	29.2376	10.9443	7.34011	19.1199	0.790384
-49.82	-35.65	17.9903	7.62998	2.31894	10.0919	0.310699
-54.4	-43.48	11.9876	8.79067	2.20858	11.034	0.261923
17.71	42.21	19.3373	7.64078	2.69598	10.5219	0.3572
-158	22.75	26.6776	9.73703	6.28613	16.6192	0.719624
-30.16	26.46	25.2968	9.12982	5.55496	15.1753	0.655246
-158	22.75	29.2276	10.9396	7.33724	19.1114	0.790287
110	-30.5	20.4392	7.74282	3.09952	11.0684	0.403819
-78.03	32.93	22.0737	8.04831	3.83305	12.1798	0.483952
-60.98	41.27	22.3885	8.12755	3.98954	12.4313	0.500457
-158	22.75	28.7476	10.7141	7.18558	18.6847	0.783684
-20.54	12.76	26.7832	9.78568	6.33913	16.7296	0.723998
-24.8	3.4	31.0759	11.7455	7.6168	20.4095	0.77472
-26.21	24.89	29.0044	10.8352	7.27007	18.9165	0.787683
-59.22	41.42	22.7295	8.22045	4.16347	12.7159	0.518583
-175.67	-19.99	23.9034	8.5934	4.7891	13.7813	0.581923
-69.02	40.58	22.2879	8.10152	3.93904	12.3497	0.495152
-3.19	-20.44	21.0988	7.84426	3.37794	11.4757	0.43482
-95.99	-12.99	29.021	10.843	7.27527	18.9312	0.787905
-37.05	35.75	19.6591	7.66183	2.8054	10.6637	0.37008
165	-19.5	27.4924	10.1176	6.67871	17.4621	0.750693
-158	22.75	26.7876	9.7877	6.34132	16.7342	0.724177
174.27	-20.75	27.8248	10.2753	6.82621	17.7974	0.761385
-158	22.75	27.7876	10.2576	6.81013	17.7603	0.760252
110	-27.5	21.3524	7.8912	3.49164	11.6475	0.447262
-8.77	42.36	18.9243	7.62429	2.56628	10.3619	0.341637
-158	22.75	26.7876	9.7877	6.34132	16.7342	0.724177
-47.69	40.95	22.7846	8.23613	4.19194	12.7629	0.521528
-34.9	22.23	27.266	10.0108	6.57369	17.2304	0.742712
-158	22.75	29.0776	10.8696	7.29278	18.9811	0.788629
-158	22.75	26.5876	9.69576	6.24053	16.525	0.715823
-45.28	-25.77	26.4376	9.62743	6.16374	16.3678	0.709346
-158	22.75	28.3776	10.5385	7.05128	18.3381	0.776155
172.12	-21.37	24.9779	8.99923	5.37999	14.8474	0.638948
-47.5	-27.6	23.554	8.47417	4.59946	13.4515	0.563031
-158	22.75	26.4676	9.64105	6.17917	16.3992	0.710656
-22.87	32.68	24.309	8.73996	5.01147	14.1754	0.60372
-78.15	32.91	22.7037	8.21317	4.15016	12.6939	0.517204
-8.77	42.36	18.3943	7.62029	2.41798	10.1931	0.323334
-158	22.75	30.1076	11.3396	7.53748	19.8084	0.791776
-16.08	5.86	18.6638	7.61993	2.4908	10.2738	0.3324
-21.22	17.79	27.3104	10.0317	6.59454	17.276	0.744318
-158	22.75	29.0176	10.8414	7.27423	18.9282	0.787861
-20	47.01	17.474	7.658	2.2103	9.99724	0.29627
110	-14	28.4737	10.5842	7.08752	18.4294	0.778302
-29.12	-20.32	29.352	10.9974	7.37199	19.2171	0.791368
-75.3	17.75	22.0975	8.05407	3.84472	12.1984	0.48519
165	-19.5	27.5324	10.1365	6.6969	17.5028	0.752046
-158	22.75	30.1076	11.3396	7.53748	19.8084	0.791776
-14.05	43.92	21.5146	7.92352	3.56617	11.7617	0.455355
-25	-13.93	26.0167	9.43889	5.94346	15.926	0.690295
-34.83	-31.16	20.4217	7.74054	3.0925	11.0584	0.403026
-158	22.75	28.7676	10.7236	7.19243	18.703	0.784033
-158	22.75	29.2476	10.949	7.34296	19.1285	0.790479
-34.84	-31.37	18.7517	7.62088	2.51573	10.3025	0.335467
-158	22.75	27.4776	10.1106	6.67194	17.447	0.750187
-8.77	42.36	19.0643	7.62856	2.60888	10.4134	0.346788
-144.5	-16.25	21.6167	7.94476	3.61377	11.8352	0.460499
-20	39.9	18.095	7.62642	2.34344	10.1159	0.313863
-115.13	-5.55	25.0313	9.02078	5.40933	14.902	0.641701
-158	22.75	29.2376	10.9443	7.34011	19.1199	0.790384
-158	22.75	26.8676	9.82472	6.38107	16.8176	0.727424
-158	22.75	26.8576	9.82008	6.37612	16.8072	0.727021
-158	22.75	26.8776	9.82935	6.38601	16.828	0.727825
-25	-13.93	26.0267	9.44331	5.94876	15.9365	0.690761
-158	22.75	28.0176	10.3671	6.90777	17.9887	0.766985
0.6	-8.62	23.4832	8.45083	4.56132	13.3859	0.559199
-114.88	-5.46	24.5413	8.82761	5.13939	14.406	0.61608
164.59	-19.22	27.9505	10.3351	6.87976	17.9225	0.765089
-29.94	65.88	3.46551	9.30861	2.56833	11.8785	0.309766
172.53	-32.32	22.7897	8.23761	4.19463	12.7674	0.521806
-158	22.75	29.4076	11.0231	7.38686	19.2636	0.791764
-158	22.75	30.1476	11.3572	7.54389	19.837	0.791483
-158	22.75	27.0076	9.8898	6.44981	16.9632	0.732967
-158	22.75	28.8576	10.7661	7.2227	18.7849	0.785525
-24.8	3.4	30.4459	11.4865	7.58358	20.0406	0.788224
-158	22.75	26.5876	9.69576	6.24053	16.525	0.715823
-158	22.75	27.3076	10.0304	6.59324	17.2731	0.744218
-109.35	-3.48	24.5382	8.82642	5.13768	14.4029	0.615915
-158	22.75	28.2176	10.4623	6.98897	18.1842	0.772293
-177.58	-33	22.6964	8.21111	4.14639	12.6877	0.516813
-158	22.75	28.4776	10.5861	7.08896	18.4331	0.778387
-158	22.75	28.5976	10.6431	7.13285	18.5459	0.780875
-124.45	-8.86	23.756	8.5423	4.70884	13.641	0.573961
-21.22	17.79	27.3104	10.0317	6.59454	17.276	0.744318
-158	22.75	26.8876	9.83399	6.39095	16.8384	0.728226
-158	22.75	30.5176	11.5169	7.59091	20.0869	0.787152
-158	22.75	26.4276	9.62289	6.15858	16.3573	0.708908
176.75	-35.87	22.3518	8.11798	3.97107	12.4014	0.498519
-158	22.75	28.9776	10.8226	7.26162	18.8927	0.787316
-30	57.86	14.0229	8.23576	1.98969	10.285	0.250859
-129.28	-10.6	23.5129	8.46059	4.57732	13.4134	0.560808
110	-26	22.2092	8.08162	3.89986	12.2867	0.491021
174.27	-20.75	26.4648	9.63977	6.17772	16.3963	0.710533
-158	22.75	28.9776	10.8226	7.26162	18.8927	0.787316
-158	22.75	25.8476	9.36468	5.85334	15.7488	0.682318
-178.32	-5	33.8912	12.5313	6.68369	20.6608	0.577041
-143.3	-15.73	22.0819	8.05027	3.83704	12.1862	0.484375
-16.08	5.86	29.1238	10.8912	7.30676	19.0215	0.78918
-158	22.75	26.1276	9.48809	6.00213	16.0424	0.695434
-158	22.75	28.0376	10.3766	6.91605	18.0084	0.767539
-29	-13.05	29.8714	11.2345	7.4946	19.6336	0.792838
-158	22.75	28.8176	10.7472	7.20936	18.7486	0.784878
-158	22.75	25.1576	9.07229	5.4787	15.0317	0.648179
-29.25	-24.44	26.0161	9.43866	5.94318	15.9254	0.690271
16.19	-28.93	25.605	9.25987	5.72269	15.4953	0.670584
-25	-24.88	23.8465	8.57355	4.75809	13.7269	0.578852
-33.31	-15.17	29.8741	11.2357	7.49513	19.6357	0.792832
-25	-13.93	28.8567	10.7657	7.22238	18.7841	0.78551
-158	22.75	28.2476	10.4766	7.00084	18.2132	0.773044
-26.4	-0.19	29.0558	10.8593	7.28607	18.9619	0.788357
-158	22.75	28.9376	10.8038	7.24883	18.8569	0.786745
-22.94	7.58	25.19	9.08559	5.49645	15.065	0.649828
-172.81	-19.5	26.8645	9.82328	6.37953	16.8144	0.727298
-75.91	16.66	21.9281	8.01381	3.7621	12.0673	0.476406
-34.9	22.23	27.286	10.0202	6.58311	17.2509	0.743439
-158	22.75	25.4876	9.2099	5.65899	15.3731	0.664793
-8.1	48.75	13.5929	8.34494	2.01829	10.4167	0.251158
110	-36.5	14.9711	8.01865	1.96689	10.0603	0.254623
-158	22.75	29.4176	11.0278	7.3895	19.272	0.791829
110	-18.5	23.3687	8.4137	4.4999	13.2808	0.553006
-158	22.75	27.8776	10.3004	6.84886	17.8501	0.762964
-76.56	15.48	21.7662	7.97712	3.68441	11.9452	0.468097
-116.53	-6.05	24.5298	8.82322	5.13307	14.3945	0.615472
-158	22.75	28.8876	10.7803	7.23258	18.812	0.785995
170	-22	28.2015	10.4547	6.98258	18.1686	0.771886
-158	22.75	26.1576	9.50145	6.01792	16.0739	0.696809
110	-17	25.2643	9.1163	5.53715	15.1416	0.653601
-55	-43.58	8.54702	9.69218	2.81963	12.5233	0.314844
-130.95	-11.15	23.4231	8.43123	4.52902	13.3306	0.555946
-54.73	-43.43	10.287	9.27496	2.50507	11.8009	0.285663
-2.63	-5.86	24.4025	8.77494	5.06295	14.2679	0.60871
-158	22.75	26.9076	9.84327	6.40082	16.8593	0.729026
110	-36.5	14.9811	8.01656	1.96697	10.0584	0.254697
-158	22.75	29.4076	11.0231	7.38686	19.2636	0.791764
-158	22.75	28.7876	10.7331	7.19923	18.7213	0.784376
-158	22.75	27.8076	10.2671	6.8188	17.7803	0.760864
-158	22.75	26.8076	9.79694	6.35129	16.755	0.724994
-158	22.75	27.9476	10.3337	6.87852	17.9196	0.765005
-158	22.75	30.8776	11.6662	7.61414	20.303	0.779986
-158	22.75	29.2276	10.9396	7.33724	19.1114	0.790287
-75.28	17.78	22.6275	8.1919	4.11098	12.6295	0.513137
-158	22.75	30.1776	11.3704	7.54853	19.8582	0.791241
-16.85	43.69	17.2742	7.67344	2.17368	9.9709	0.291215
174.27	-20.75	28.3148	10.5086	7.02711	18.2779	0.774681
-158	22.75	27.2876	10.021	6.58385	17.2526	0.743496
170	-22	29.0115	10.8386	7.27233	18.9228	0.78778
-158	22.75	29.5376	11.083	7.42007	19.3707	0.79247
-158	22.75	27.5276	10.1342	6.69471	17.4979	0.751884
-158	22.75	29.0376	10.8508	7.28046	18.9459	0.788124
-158	22.75	27.0176	9.89446	6.45468	16.9736	0.733356
110	-36.5	14.9811	8.01656	1.96697	10.0584	0.254697
-158	22.75	28.0176	10.3671	6.90777	17.9887	0.766985
-158	22.75	27.8076	10.2671	6.8188	17.7803	0.760864
-31.4	-27.63	23.5193	8.4627	4.58076	13.4193	0.561154
-124.37	-8.83	23.8033	8.55858	4.73457	13.6858	0.576519
-158	22.75	28.4176	10.5575	7.06647	18.3762	0.777064
-158	22.75	29.5776	11.1013	7.42982	19.4032	0.792626
-158	22.75	26.9676	9.87117	6.43028	16.9217	0.731401
-158	22.75	28.6076	10.6478	7.13644	18.5552	0.781073
-46.12	-32.8	17.7343	7.64171	2.26255	10.0402	0.303302
-179.26	-34.73	22.8454	8.25368	4.22355	12.8154	0.524792
-158	22.75	28.3276	10.5147	7.03207	18.2902	0.774986
-158	22.75	26.9876	9.88048	6.44005	16.9425	0.732186
-158	22.75	28.5976	10.6431	7.13285	18.5459	0.780875
-25.72	30.29	24.5891	8.84596	5.16573	14.4538	0.618607
-158	22.75	26.9576	9.86651	6.42538	16.9113	0.731008
178.64	-20.97	25.4476	9.193	5.63723	15.3315	0.662806
-119.39	-7.07	23.9696	8.61675	4.82528	13.8448	0.585495
168	-20	27.0054	9.88875	6.44871	16.9609	0.732879
-158	22.75	29.4076	11.0231	7.38686	19.2636	0.791764
-178.32	-5	33.9412	12.5377	6.64757	20.6389	0.571098
-52.68	41.95	22.7199	8.21773	4.1585	12.7077	0.518068
-77.22	14.33	21.4663	7.91371	3.54383	11.7273	0.452935
-158	22.75	27.1076	9.9365	6.49823	17.0669	0.736815
-158	22.75	27.7576	10.2433	6.79708	17.7302	0.759327
110	-29	20.287	7.72369	3.03902	10.9827	0.39697
-21.61	44.46	24.2727	8.7265	4.9915	14.1397	0.601779
-158	22.75	30.7376	11.6089	7.60786	20.2223	0.783132
-30	34.07	21.4153	7.90351	3.52036	11.6913	0.450386
-133.41	-12.02	23.183	8.35506	4.40095	13.1127	0.542968
-158	22.75	28.9776	10.8226	7.26162	18.8927	0.787316
-158	22.75	28.4176	10.5575	7.06647	18.3762	0.777064
-158	22.75	29.2276	10.9396	7.33724	19.1114	0.790287
-158	22.75	26.7076	9.75082	6.30124	16.6506	0.720876
-108.12	-3.05	24.6492	8.8692	5.19886	14.5141	0.621779
-158	22.75	27.0576	9.91313	6.47409	17.0151	0.734903
176.38	-20.71	24.4043	8.7756	5.06391	14.2696	0.608804
-108.86	-3.32	25.1527	9.07026	5.47599	15.0266	0.647927
18.01	-33.62	19.2269	7.63521	2.66013	10.4768	0.352934
-158	22.75	30.9076	11.6784	7.61502	20.3197	0.779251
-25	-13.93	28.8467	10.761	7.21906	18.775	0.785351
-158	22.75	28.3976	10.548	7.0589	18.3572	0.776612
-158	22.75	25.6876	9.29532	5.76733	15.5815	0.674614
-80.04	9.85	29.0133	10.8394	7.27288	18.9244	0.787804
-158	22.75	27.0976	9.93182	6.49341	17.0565	0.736434
-16.89	43.79	17.3042	7.67096	2.17899	9.9745	0.291955
-158	22.75	29.6476	11.1333	7.44637	19.4593	0.792826
-158	22.75	29.5576	11.0922	7.42497	19.387	0.792552
-158	22.75	26.9276	9.85256	6.41066	16.8801	0.729821
-158	22.75	26.3676	9.59573	6.12757	16.2943	0.706265
-76.78	33.83	22.7201	8.2178	4.15862	12.7079	0.518081
-158	22.75	27.6976	10.2148	6.77076	17.6699	0.757444
-141.22	-14.85	22.5326	8.16592	4.0625	12.55	0.508088
170	-22	27.6415	10.1882	6.74592	17.6134	0.755647
-79.07	10.95	21.6319	7.94798	3.6209	11.8463	0.461268
-55	-43.58	8.53702	9.69414	2.82125	12.5269	0.315006
-30	49.44	18.3279	7.62113	2.40087	10.1748	0.321179
178.64	-20.97	26.1676	9.50591	6.02318	16.0844	0.697267
-158	22.75	29.4176	11.0278	7.3895	19.272	0.791829
-158	22.75	29.0376	10.8508	7.28046	18.9459	0.788124
-8.77	42.36	18.3443	7.6209	2.40506	10.1793	0.321707
-158	22.75	29.2076	10.9303	7.33147	19.0942	0.790088
-129.4	-23.28	23.4153	8.42871	4.52485	13.3234	0.555525
-74.91	35.83	22.9095	8.27239	4.25694	12.8709	0.528231
-25.99	-28.79	21.0563	7.83682	3.35923	11.4477	0.432762
-158	22.75	28.8076	10.7425	7.20599	18.7395	0.784712
-15.41	44.96	23.554	8.47418	4.59948	13.4516	0.563033
-158	22.75	27.6276	10.1816	6.73971	17.5993	0.755194
-158	22.75	27.6876	10.2101	6.76635	17.6598	0.757126
-78.7	32.56	22.8659	8.25963	4.2342	12.8331	0.52589
-9.7	48.45	29.4465	11.0411	7.39704	19.296	0.792007
-24.8	3.4	31.1859	11.7885	7.61502	20.4646	0.77138
-22.94	7.58	23.92	8.59923	4.79816	13.7971	0.582818
-158	22.75	28.5776	10.6336	7.12564	18.5272	0.780475
-113.71	-5.05	24.7046	8.89078	5.22942	14.57	0.624696
-149.98	-17.75	19.8347	7.67636	2.86809	10.7473	0.377371
-39.63	43.02	23.4002	8.42384	4.51677	13.3096	0.55471
-8.79	42.23	18.6943	7.6202	2.49939	10.2836	0.333458
-158	22.75	29.4276	11.0324	7.39212	19.2803	0.791892
-80.03	31.2	22.451	8.14401	4.02106	12.4825	0.503759
-158	22.75	26.7676	9.77847	6.33133	16.7133	0.723357
-24.99	-16.59	28.4741	10.5844	7.08764	18.4298	0.77831
178.21	-26.99	25.464	9.19991	5.64615	15.3485	0.663621
-105.81	-2.58	24.735	8.90266	5.24616	14.6006	0.62629
-158	22.75	27.2876	10.021	6.58385	17.2526	0.743496
-158	22.75	28.5676	10.6288	7.12202	18.5178	0.780273
-117.63	-6.44	24.3258	8.74622	5.02071	14.192	0.604618
168	-20	27.3554	10.0529	6.61554	17.3221	0.745926
-158	22.75	28.8476	10.7614	7.21938	18.7759	0.785366
-144.4	-16.2	21.6067	7.94265	3.60909	11.828	0.459994
-25	-13.93	26.0267	9.44331	5.94876	15.9365	0.690761
-158	22.75	29.6676	11.1424	7.45097	19.4752	0.792866
-34.84	-31.37	20.3017	7.72547	3.04482	10.9909	0.397628
-29.94	65.88	5.08551	9.82074	2.98358	12.8072	0.340263
-30.16	26.46	25.7668	9.32956	5.81	15.6643	0.678447
-158	22.75	26.6976	9.74622	6.29621	16.6401	0.720459
-158	22.75	28.5676	10.6288	7.12202	18.5178	0.780273
-100.63	-16.96	26.0751	9.46477	5.97443	15.9873	0.693013
-158	22.75	26.7376	9.76463	6.3163	16.682	0.72212
-158	22.75	28.4176	10.5575	7.06647	18.3762	0.777064
172.12	-21.37	24.9779	8.99923	5.37999	14.8474	0.638948
-158	22.75	28.1576	10.4337	6.96499	18.1259	0.770756
-74.91	35.1	21.9583	8.02087	3.77676	12.0905	0.477969
-158	22.75	28.5976	10.6431	7.13285	18.5459	0.780875
-158	22.75	26.4476	9.63197	6.16889	16.3783	0.709784
-158	22.75	27.1276	9.94586	6.50784	17.0876	0.737573
-12.77	3.07	27.2766	10.0158	6.57865	17.2412	0.743095
-158	22.75	28.4976	10.5956	7.09638	18.452	0.778816
-45.15	-26.03	26.0481	9.4528	5.96013	15.959	0.691759
-176.33	-32.37	22.4933	8.15533	4.04254	12.5175	0.506004
-29.3	27.21	26.0936	9.47298	5.98421	16.0067	0.693869
-140.28	-8.91	30.2802	11.4151	7.56332	19.9296	0.790271
-158	22.75	28.0176	10.3671	6.90777	17.9887	0.766985
-46.12	-32.8	17.7343	7.64171	2.26255	10.0402	0.303302
-158	22.75	28.3876	10.5433	7.05509	18.3477	0.776384
-26.32	44.02	23.8251	8.5661	4.74642	13.7065	0.577694
-8.44	43.42	18.5292	7.61949	2.45377	10.2322	0.32781
-158	22.75	26.7076	9.75082	6.30124	16.6506	0.720876
-158	22.75	27.7976	10.2624	6.81447	17.7703	0.760559
-30	57.86	14.0429	8.23083	1.98862	10.2793	0.250875
-53.3	-39.35	16.961	7.70265	2.12241	9.94106	0.283893
-158	22.75	30.6576	11.5758	7.60268	20.1743	0.784722
-20.54	12.76	32.2132	12.1501	7.47601	20.8228	0.724527
-158	22.75	26.7076	9.75082	6.30124	16.6506	0.720876
-52.19	-37.81	14.3355	8.16032	1.97583	10.2004	0.251411
-158	22.75	27.1676	9.9646	6.52699	17.1289	0.739077
-158	22.75	28.0176	10.3671	6.90777	17.9887	0.766985
-158	22.75	28.6176	10.6526	7.14002	18.5645	0.781269
-21.88	26.28	25.5586	9.24005	5.69753	15.4469	0.668302
-158	22.75	28.8176	10.7472	7.20936	18.7486	0.784878
-77.8	13.27	21.8326	7.99196	3.71614	11.9949	0.471496
-158	22.75	29.6976	11.156	7.45777	19.499	0.792912
-158	22.75	26.6876	9.74162	6.29117	16.6297	0.720042
-25	-13.93	28.8567	10.7657	7.22238	18.7841	0.78551
-158	22.75	28.4476	10.5718	7.07776	18.4047	0.777732
168	-20	27.3454	10.0482	6.61088	17.3118	0.74557
-30.16	26.46	26.1068	9.47885	5.99117	16.0206	0.694478
-16.08	5.86	18.4138	7.6201	2.42306	10.1986	0.323972
-158	22.75	27.4776	10.1106	6.67194	17.447	0.750187
-158	22.75	29.0676	10.8649	7.28971	18.9723	0.788506
-158	22.75	28.4076	10.5528	7.06269	18.3667	0.776839
-158	22.75	27.0976	9.93182	6.49341	17.0565	0.736434
-21.01	13.8	23.0059	8.30101	4.30743	12.9553	0.533414
-55.6	-47.59	7.26333	9.88389	2.99059	12.8815	0.333066
-12.63	-4.47	25.519	9.22321	5.67604	15.4057	0.666348
-36.6	24.87	29.8419	11.2213	7.48867	19.6112	0.792892
-158	22.75	28.3176	10.51	7.0282	18.2806	0.774748
-158	22.75	27.4776	10.1106	6.67194	17.447	0.750187
-33.31	-15.17	29.8641	11.2312	7.49314	19.6281	0.792853
-158	22.75	27.4576	10.1011	6.66279	17.4266	0.749501
-158	22.75	28.8676	10.7708	7.226	18.794	0.785683
-30	50.84	17.2306	7.67714	2.16611	9.96592	0.290153
-9.7	48.45	16.7865	7.72153	2.09706	9.93041	0.280133
-178.51	-20.45	24.3528	8.75628	5.03556	14.2186	0.606058
-158	22.75	26.7676	9.77847	6.33133	16.7133	0.723357
-26.34	24.63	28.8044	10.741	7.2049	18.7366	0.784658
-158	22.75	29.7576	11.1832	7.47098	19.546	0.792953
-12.63	-4.47	25.129	9.06056	5.463	15.0022	0.646717
-158	22.75	30.2276	11.3922	7.55595	19.8933	0.790796
-20	39.9	18.105	7.62612	2.34582	10.1182	0.314169
-158	22.75	27.3476	10.0492	6.61193	17.3142	0.74565
-43.65	41.19	22.8823	8.26443	4.24277	12.8473	0.526772
-46.01	-24.36	18.2695	7.62212	2.38608	10.1593	0.319307
-158	22.75	27.1976	9.97867	6.54129	17.1599	0.740196
-28.21	-3.92	29.7859	11.1961	7.47704	19.5681	0.792948
39.56	-21.38	25.4389	9.18933	5.63249	15.3225	0.662372
-8.36	43.37	21.6896	7.96035	3.64808	11.8885	0.464195
-158	22.75	26.0376	9.44815	5.95457	15.9479	0.691271
110	-24.5	22.3252	8.11109	3.9577	12.3798	0.497115
-158	22.75	29.3476	10.9954	7.37079	19.2134	0.791335
-158	22.75	29.2576	10.9536	7.3458	19.1371	0.790572
-158	22.75	28.8176	10.7472	7.20936	18.7486	0.784878
-158	22.75	29.2576	10.9536	7.3458	19.1371	0.790572
-158	22.75	25.9876	9.42607	5.92803	15.8955	0.688937
-158	22.75	26.3776	9.60025	6.13275	16.3048	0.706707
-77.8	13.23	22.4626	8.14711	4.02696	12.4921	0.504376
-158	22.75	26.7176	9.75542	6.30626	16.661	0.721291
-158	22.75	28.5176	10.6051	7.10376	18.4709	0.779239
-158	22.75	29.1376	10.8977	7.31089	19.0336	0.789338
-158	22.75	29.3276	10.9861	7.36532	19.1965	0.791178
-158	22.75	28.8976	10.785	7.23585	18.821	0.786148
-158	22.75	28.8976	10.785	7.23585	18.821	0.786148
-158	22.75	26.1576	9.50145	6.01792	16.0739	0.696809
-158	22.75	27.7876	10.2576	6.81013	17.7603	0.760252
-110.7	-3.98	25.0171	9.01502	5.4015	14.8874	0.640968
0.6	-8.62	21.5732	7.93561	3.59341	11.8037	0.458301
-158	22.75	27.0076	9.8898	6.44981	16.9632	0.732967
-158	22.75	29.0976	10.8789	7.29886	18.9986	0.788872
-178.37	-33.42	22.7148	8.2163	4.15588	12.7033	0.517796
-24.99	-16.59	28.5041	10.5986	7.09876	18.4581	0.778953
-20	24.51	18.6213	7.61966	2.47896	10.2604	0.330937
-158	22.75	29.0976	10.8789	7.29886	18.9986	0.788872
-158	22.75	27.6876	10.2101	6.76635	17.6598	0.757126
-37.88	43.15	23.2383	8.37229	4.43029	13.1624	0.545951
164.59	-19.22	26.3705	9.59705	6.12908	16.2974	0.706395
170	-22	28.1415	10.4261	6.95851	18.1102	0.770336
-158	22.75	28.8576	10.7661	7.2227	18.7849	0.785525
-21	21.95	27.8643	10.2941	6.84318	17.8369	0.76257
-30	57.86	14.0529	8.22837	1.9881	10.2764	0.250884
-158	22.75	28.8976	10.785	7.23585	18.821	0.786148
16.45	-29.52	26.5962	9.69968	6.24489	16.534	0.716188
170	-22	26.7715	9.78028	6.33329	16.7174	0.723519
-24.02	5.17	31.2315	11.8061	7.61359	20.4865	0.769907
-79.28	10.51	21.7632	7.97645	3.68299	11.943	0.467944
-115.13	-5.58	24.7513	8.90907	5.25516	14.6171	0.627146
-17.51	36.61	31.6752	11.9704	7.57746	20.672	0.752714
-30	57.86	13.9929	8.24318	1.99133	10.2936	0.250841
-158	22.75	26.3876	9.60477	6.13792	16.3153	0.707149
-158	22.75	26.3876	9.60477	6.13792	16.3153	0.707149
-158	22.75	28.2676	10.4861	7.00871	18.2325	0.773538
-158	22.75	29.1376	10.8977	7.31089	19.0336	0.789338
-158	22.75	28.2576	10.4814	7.00478	18.2229	0.773292
-158	22.75	28.4076	10.5528	7.06269	18.3667	0.776839
-158	22.75	26.4676	9.64105	6.17917	16.3992	0.710656
-158	22.75	28.1876	10.448	6.97702	18.1551	0.771531
-158	22.75	30.0876	11.3308	7.53418	19.794	0.79191
-158	22.75	29.0976	10.8789	7.29886	18.9986	0.788872
-158	22.75	28.6176	10.6526	7.14002	18.5645	0.781269
-158	22.75	29.5576	11.0922	7.42497	19.387	0.792552
-158	22.75	20.2976	7.72497	3.04319	10.9886	0.397444
-158	22.75	28.2176	10.4623	6.98897	18.1842	0.772293
-17.43	41.08	16.3904	7.77109	2.04803	9.92189	0.272453
110	-29	20.737	7.7849	3.22202	11.245	0.417558
-21.88	26.28	25.4586	9.19763	5.6432	15.3429	0.663352
-158	22.75	26.6276	9.71408	6.26084	16.5669	0.717521
39.88	18.4	31.9662	12.0704	7.5308	20.7642	0.738508
-8.77	42.36	18.3443	7.6209	2.40506	10.1793	0.321707
-179.26	-34.73	24.1054	8.66535	4.89965	13.9762	0.592808
-12.77	3.07	23.3966	8.42266	4.51481	13.3063	0.554511
-83.93	5.6	21.7259	7.96825	3.66526	11.9153	0.466042
-158	22.75	26.7976	9.79232	6.3463	16.7446	0.724586
-20	24.51	20.1313	7.70578	2.97867	10.8984	0.390094
-158	22.75	27.3176	10.0351	6.59792	17.2834	0.744578
-158	22.75	29.0976	10.8789	7.29886	18.9986	0.788872
-20	39.9	18.095	7.62642	2.34344	10.1159	0.313863
-9.7	48.45	29.4365	11.0365	7.39445	19.2877	0.791947
-158	22.75	25.7876	9.33857	5.82116	15.686	0.679446
-21.88	26.28	25.4586	9.19763	5.6432	15.3429	0.663352
164.65	-19.22	27.7105	10.221	6.77646	17.6829	0.757853
-75.95	16.6	22.5981	8.18378	4.09591	12.6047	0.511569
-158	22.75	28.6376	10.662	7.14715	18.5831	0.781657
-158	22.75	26.1476	9.49699	6.01266	16.0634	0.696351
-19.49	9.71	31.3933	11.8675	7.60514	20.5601	0.764243
-158	22.75	26.5876	9.69576	6.24053	16.525	0.715823
165	-19.5	26.3424	9.58436	6.11451	16.2679	0.705148
-78.15	12.65	22.6042	8.18547	4.09906	12.6099	0.511897
-158	22.75	26.0776	9.46587	5.97574	15.9899	0.693128
-158	22.75	28.8276	10.752	7.21271	18.7577	0.785042
-158	22.75	29.7976	11.2013	7.4795	19.5771	0.792941
-158	22.75	27.3176	10.0351	6.59792	17.2834	0.744578
178.32	22	26.8382	9.81108	6.36648	16.7869	0.726236
168	-20	27.0054	9.88875	6.44871	16.9609	0.732879
-12.63	-4.47	24.669	8.8769	5.20979	14.5341	0.622823
179	16	27.6853	10.209	6.76534	17.6575	0.757053
-158	22.75	28.7576	10.7189	7.18901	18.6939	0.783859
-21.88	26.28	25.4486	9.19341	5.63776	15.3325	0.662854
-158	22.75	27.4476	10.0964	6.6582	17.4164	0.749156
-158	22.75	28.2176	10.4623	6.98897	18.1842	0.772293
-158	22.75	29.3876	11.0139	7.38156	19.247	0.791628
-24.99	-16.59	28.5041	10.5986	7.09876	18.4581	0.778953
-75.3	17.75	22.1075	8.0565	3.84964	12.2063	0.485711
-123.46	-8.67	23.7203	8.53011	4.68948	13.6073	0.572033
-158	22.75	27.0076	9.8898	6.44981	16.9632	0.732967
-158	22.75	26.7776	9.78308	6.33632	16.7237	0.723768
-172.81	-19.5	26.9245	9.85112	6.40913	16.8768	0.729698
178.32	22	26.6382	9.71892	6.26619	16.578	0.717967
-158	22.75	27.3476	10.0492	6.61193	17.3142	0.74565
-173.63	-30.57	21.541	7.92893	3.5784	11.7805	0.456679
-158	22.75	27.5376	10.139	6.69925	17.5081	0.75222
-21.3	44.5	24.0264	8.63696	4.85636	13.8996	0.588556
-55.6	-47.59	7.26333	9.88389	2.99059	12.8815	0.333066
-29.75	43.7	23.5121	8.46034	4.5769	13.4127	0.560766
-158	22.75	27.1176	9.94118	6.50303	17.0772	0.737194
-158	22.75	27.1276	9.94586	6.50784	17.0876	0.737573
-79.53	30.56	22.2926	8.10274	3.94143	12.3535	0.495403
-158	22.75	27.5276	10.1342	6.69471	17.4979	0.751884
-25.78	1.29	29.148	10.9025	7.31398	19.0426	0.789455
-158	22.75	28.7176	10.6999	7.17523	18.6571	0.78315
-21.47	21.76	24.4843	8.80587	5.10799	14.3491	0.613059
-158	22.75	26.5676	9.68662	6.23035	16.5041	0.71497
110	-29	20.737	7.7849	3.22202	11.245	0.417558
-18.21	47.37	19.7273	7.66721	2.82948	10.6956	0.372887
-30	36.78	21.8199	7.98908	3.71002	11.9853	0.470841
-8.36	43.37	18.2796	7.62193	2.38862	10.162	0.31963
-22.28	9.05	32.0265	12.0903	7.51874	20.7802	0.735264
-159	31.52	27.99	10.3539	6.89628	17.9615	0.766211
164.65	-19.22	27.7805	10.2542	6.80706	17.7532	0.760035
-56.55	40.8	22.9935	8.2973	4.30092	12.9444	0.532747
-158	22.75	30.0776	11.3264	7.53251	19.7867	0.791974
-22.94	7.58	30.41	11.4711	7.57957	20.017	0.78872
-158	22.75	26.7176	9.75542	6.30626	16.661	0.721291
-29.94	65.88	3.86551	9.48048	2.7132	12.1954	0.321113
-158	22.75	29.7976	11.2013	7.4795	19.5771	0.792941
-158	22.75	29.5276	11.0784	7.41759	19.3626	0.792427
-158	22.75	26.9976	9.88514	6.44493	16.9529	0.732577
-77.24	14.03	22.277	8.09874	3.93362	12.3409	0.494581
-55.6	-47.59	7.27333	9.88293	2.98962	12.8796	0.33295
-20	47.01	17.434	7.66089	2.20272	9.99151	0.295235
47.48	-11.6	28.3727	10.5362	7.04941	18.3334	0.776041
-139.6	25.77	24.6504	8.86966	5.19951	14.5153	0.621841
-116.35	-5.98	24.7177	8.8959	5.23665	14.5832	0.625385
-158	22.75	25.5476	9.23537	5.69158	15.4355	0.667761
-29	25.65	26.5181	9.66405	6.20509	16.4522	0.712846
-52.28	41.98	24.1867	8.6949	4.94426	14.0554	0.597173
-17.43	41.08	31.7004	11.9793	7.57416	20.6809	0.751576
-158	22.75	28.2776	10.4909	7.01262	18.2422	0.773782
-158	22.75	26.2276	9.53274	6.05465	16.1474	0.699995
-158	22.75	27.9876	10.3528	6.89529	17.9591	0.766144
-158	22.75	29.7876	11.1968	7.47739	19.5693	0.792947
-158	22.75	29.5376	11.083	7.42007	19.3707	0.79247
-158	22.75	28.2076	10.4576	6.985	18.1745	0.772041
-158	22.75	27.6476	10.1911	6.74862	17.6195	0.755843
-6.17	-2.81	23.6826	8.51728	4.66901	13.5718	0.569991
-158	22.75	27.0876	9.92714	6.48859	17.0462	0.736053
-12.72	-1.36	21.4967	7.91986	3.55787	11.7489	0.454457
-26.33	24.67	28.8644	10.7693	7.22493	18.791	0.785632
164.65	-19.22	27.7605	10.2447	6.79836	17.7331	0.759418
-158	22.75	26.8776	9.82935	6.38601	16.828	0.727825
-20.54	12.76	23.3132	8.39596	4.47023	13.2302	0.550003
-158	22.75	27.9976	10.3575	6.89946	17.969	0.766426
-158	22.75	27.7676	10.2481	6.80144	17.7402	0.759637
-124.64	-8.93	23.676	8.51505	4.66543	13.5656	0.569634
-158	22.75	28.4776	10.5861	7.08896	18.4331	0.778387
18.01	-33.62	13.6069	8.34129	2.01719	10.4121	0.251129
-158	22.75	26.1676	9.50591	6.02318	16.0844	0.697267
-27.34	-2.02	29.2966	10.9717	7.35675	19.1703	0.79092
-20.01	39.87	19.905	7.68278	2.89378	10.782	0.380342
-13.98	48.06	16.1418	7.80679	2.02326	9.92742	0.268239
-14.3	-7.23	26.1164	9.4831	5.99622	16.0306	0.694919
47.46	-11.64	28.1727	10.4409	6.97105	18.1406	0.771147
-158	22.75	26.7176	9.75542	6.30626	16.661	0.721291
-127.2	-9.83	23.7115	8.5271	4.6847	13.599	0.571556
-158	22.75	27.9376	10.329	6.87431	17.9097	0.764717
-158	22.75	29.3676	11.0047	7.3762	19.2302	0.791485
-158	22.75	26.6976	9.74622	6.29621	16.6401	0.720459
-158	22.75	28.5776	10.6336	7.12564	18.5272	0.780475
-158	22.75	29.6776	11.1469	7.45325	19.4832	0.792883
-158	22.75	28.6776	10.681	7.16127	18.6202	0.782416
110	-29	20.747	7.78642	3.22623	11.2512	0.418027
-158	22.75	27.1776	9.96929	6.53176	17.1392	0.739451
-158	22.75	26.7176	9.75542	6.30626	16.661	0.721291
-158	22.75	28.5976	10.6431	7.13285	18.5459	0.780875
-158	22.75	26.7876	9.7877	6.34132	16.7342	0.724177
-148.89	25.02	26.1858	9.51405	6.03276	16.1035	0.698098
-10.64	47.96	19.446	7.64708	2.73212	10.5681	0.361477
-30	38.48	24.623	8.85905	5.18443	14.4878	0.620398
-158	22.75	25.3276	9.14264	5.57178	15.2071	0.656797
-13.2	-1.37	23.9132	8.59686	4.79447	13.7907	0.582453
-158	22.75	25.4176	9.18035	5.62089	15.3004	0.661309
-158	22.75	28.5376	10.6146	7.11109	18.4897	0.779657
66.42	-9.39	29.7079	11.1607	7.46008	19.5071	0.792924
-49.82	-35.65	17.9903	7.62998	2.31894	10.0919	0.310699
-158	22.75	29.4676	11.0508	7.40247	19.3134	0.792128
-148.89	25.02	26.1958	9.51852	6.038	16.114	0.698553
-158	22.75	26.3376	9.58219	6.11201	16.2628	0.704933
26.29	-35.19	22.3318	8.1128	3.96103	12.3852	0.497464
-30	34.07	25.2053	9.09189	5.50483	15.0807	0.650607
-151.81	-18.81	18.7746	7.62122	2.52231	10.3101	0.336274
-158	22.75	24.4276	8.78438	5.07675	14.2927	0.610044
-17.44	5.98	30.0166	11.2994	7.52197	19.7422	0.792319
17.4	39.84	18.9889	7.62609	2.58575	10.3853	0.343996
-26.3	24.7	28.8844	10.7787	7.23152	18.8091	0.785945
-158	22.75	27.2576	10.0068	6.56972	17.2217	0.742405
-158	22.75	26.6576	9.72784	6.27603	16.5983	0.718785
179.82	-30.1	25.6909	9.29674	5.7691	15.5849	0.674774
-158	22.75	29.5576	11.0922	7.42497	19.387	0.792552
-36.59	24.94	29.8219	11.2123	7.48457	19.5958	0.792919
-158	22.75	27.4476	10.0964	6.6582	17.4164	0.749156
-9.7	48.45	29.4465	11.0411	7.39704	19.296	0.792007
-48.88	42.27	23.6944	8.52128	4.6754	13.5829	0.570628
-158	22.75	27.3476	10.0492	6.61193	17.3142	0.74565
-17.05	32.43	28.401	10.5496	7.06019	18.3604	0.776689
-164.08	-25.8	17.4841	7.65729	2.21223	9.99872	0.296534
-40.08	42.98	22.7909	8.23795	4.19524	12.7684	0.52187
-158	22.75	26.9876	9.88048	6.44005	16.9425	0.732186
-125.68	-9.3	23.7531	8.54129	4.70725	13.6382	0.573802
-75.35	34.71	22.397	8.12977	3.99382	12.4382	0.500906
-158	22.75	27.7776	10.2528	6.80579	17.7503	0.759945
-158	22.75	29.1776	10.9163	7.32273	19.0683	0.789777
-24.02	5.17	30.9815	11.708	7.61646	20.3599	0.777348
110	-24.5	21.9252	8.01314	3.76069	12.0651	0.476256
-158	22.75	28.2276	10.4671	6.99294	18.1939	0.772545
-178	-15	26.8934	9.83669	6.39382	16.8445	0.728459
-158	22.75	27.4376	10.0917	6.6536	17.4062	0.748811
-158	22.75	29.3976	11.0185	7.38422	19.2553	0.791697
-158	22.75	29.6576	11.1378	7.44868	19.4673	0.792847
-28.21	-3.92	30.1859	11.374	7.5498	19.8641	0.791171
-177.07	-32.73	22.6943	8.21053	4.14531	12.6859	0.516701
-158	22.75	28.9676	10.8179	7.25844	18.8837	0.787176
-148.89	25.02	26.2058	9.52299	6.04325	16.1245	0.699008
168	-20	25.0454	9.02648	5.41707	14.9164	0.642426
-51.99	40.88	23.58	8.4828	4.61349	13.4757	0.564438
-158	22.75	28.4776	10.5861	7.08896	18.4331	0.778387
-139.6	25.77	24.6504	8.86966	5.19951	14.5153	0.621841
-55	-43.58	8.56702	9.68824	2.81637	12.5162	0.314521
-36.13	43.32	22.8477	8.25434	4.22473	12.8173	0.524913
164.65	-19.22	27.5305	10.1356	6.69604	17.5009	0.751983
-145.9	-16.76	20.9449	7.81791	3.31068	11.3754	0.427403
-148.89	25.02	26.2058	9.52299	6.04325	16.1245	0.699008
-158	22.75	27.2676	10.0116	6.57444	17.232	0.742769
-158	22.75	27.5376	10.139	6.69925	17.5081	0.75222
-158	22.75	26.9276	9.85256	6.41066	16.8801	0.729821
-158	22.75	29.4076	11.0231	7.38686	19.2636	0.791764
-9.23	47.43	23.0752	8.32193	4.3439	13.0165	0.537148
-158	22.75	29.7576	11.1832	7.47098	19.546	0.792953
-158	22.75	27.7376	10.2338	6.78834	17.7101	0.758704
-77.23	14.28	22.0763	8.04893	3.83432	12.1819	0.484087
-14.84	-8.02	26.1246	9.48677	6.00057	16.0393	0.695297
-76.7	15.27	21.8662	7.99959	3.73227	12.0203	0.473221
-166.4	-27.07	18.1752	7.62419	2.36274	10.1353	0.316337
-158	22.75	28.2576	10.4814	7.00478	18.2229	0.773292
-16.08	5.86	26.9538	9.86473	6.42351	16.9073	0.730857
110	-33.5	18.0937	7.62646	2.34311	10.1156	0.313821
-158	22.75	27.3576	10.0539	6.61659	17.3244	0.746005
-8.4	43.39	20.7796	7.79143	3.24	11.2713	0.419561
26.31	-35.25	22.3218	8.11022	3.95602	12.3771	0.496938
-45.3	42.56	23.0354	8.30989	4.32295	12.9813	0.535005
-8.83	42.36	18.4843	7.61962	2.4417	10.2189	0.326305
167.98	-25.18	20.8938	7.80952	3.28866	11.3428	0.424965
-19.49	9.71	31.4933	11.9046	7.59724	20.6022	0.760399
-9.7	48.45	17.3665	7.66599	2.19023	9.98237	0.293515
-158	22.75	29.4676	11.0508	7.40247	19.3134	0.792128
-158	22.75	28.2676	10.4861	7.00871	18.2325	0.773538
-20.54	12.76	32.1832	12.1407	7.48343	20.8167	0.726322
-158	22.75	25.9476	9.40847	5.90675	15.8536	0.687058
-158	22.75	26.8576	9.82008	6.37612	16.8072	0.727021
-22.28	9.05	26.2365	9.5367	6.05928	16.1566	0.700396
-158	22.75	28.4176	10.5575	7.06647	18.3762	0.777064
110	-35	17.5441	7.65319	2.22386	10.0078	0.298114
-20.01	39.87	19.915	7.68372	2.89746	10.787	0.380767
-30	57.86	13.9829	8.24567	1.99189	10.2965	0.250836
-8.44	43.42	19.2292	7.63532	2.66087	10.4777	0.353022
-158	22.75	29.2676	10.9583	7.34863	19.1456	0.790664
-45.08	-26.18	25.7581	9.32577	5.8053	15.6551	0.678026
-8.44	43.42	18.1392	7.62514	2.35403	10.1265	0.315221
-153.42	23.91	25.6539	9.28082	5.74912	15.5463	0.672973
-158	22.75	27.8976	10.3099	6.85738	17.87	0.763554
-17.51	36.61	31.6852	11.9739	7.57617	20.6755	0.752265
-158	22.75	28.8576	10.7661	7.2227	18.7849	0.785525
-174.32	-31.32	21.9525	8.0195	3.77392	12.086	0.477666
-158	22.75	26.7776	9.78308	6.33632	16.7237	0.723768
169.35	-27.4	22.2467	8.09106	3.91852	12.3166	0.49299
-75.95	16.56	22.4333	8.13932	4.01211	12.4679	0.502823
-22.94	7.58	30.07	11.323	7.53122	19.7812	0.792021
-158	22.75	29.2376	10.9443	7.34011	19.1199	0.790384
-158	22.75	27.9976	10.3575	6.89946	17.969	0.766426
-158	22.75	27.3776	10.0634	6.62588	17.3449	0.746713
-131.5	-11.35	23.3417	8.40505	4.48546	13.2562	0.551545
-57.29	-50.99	8.42938	9.71484	2.83851	12.5644	0.316733
-88.38	25.51	27.0328	9.90155	6.46206	16.9894	0.733945
-153.42	23.91	25.6539	9.28082	5.74912	15.5463	0.672973
-158	22.75	26.7076	9.75082	6.30124	16.6506	0.720876
179.82	-30.1	25.2309	9.10247	5.51887	15.1072	0.651908
-158	22.75	26.7076	9.75082	6.30124	16.6506	0.720876
-153.42	23.91	25.6539	9.28082	5.74912	15.5463	0.672973
-55	-43.58	8.52702	9.69609	2.82287	12.5304	0.315168
-30	41.19	23.8128	8.56186	4.73975	13.6949	0.577033
-25.78	1.29	29.158	10.9072	7.31695	19.0513	0.789565
-158	22.75	26.1376	9.49254	6.0074	16.0529	0.695893
-30	36.78	23.4099	8.42695	4.52194	13.3184	0.555231
168.1	-26	21.7314	7.96944	3.66785	11.9193	0.466319
-43.46	42.71	22.8792	8.26351	4.24113	12.8446	0.526603
-30	38.48	24.993	9.00529	5.38827	14.8628	0.639725
-20.66	12.75	32.3732	12.1988	7.43277	20.8506	0.714494
-30	59.35	13.0527	8.4895	2.06873	10.6047	0.253174
-158	22.75	28.2276	10.4671	6.99294	18.1939	0.772545
-158	22.75	25.7576	9.32556	5.80503	15.6546	0.678002
-158	22.75	29.1376	10.8977	7.31089	19.0336	0.789338
-158	22.75	28.3676	10.5338	7.04746	18.3286	0.775924
110	-35	17.5341	7.65386	2.2219	10.0063	0.297849
-20.01	39.87	20.035	7.69556	2.94214	10.848	0.38591
-158	22.75	26.3476	9.5867	6.1172	16.2733	0.705378
-158	22.75	26.7076	9.75082	6.30124	16.6506	0.720876
-158	22.75	26.7076	9.75082	6.30124	16.6506	0.720876
-78.61	11.79	22.3678	8.12213	3.9791	12.4144	0.499362
-139.6	25.77	24.7404	8.90477	5.24913	14.6061	0.626573
-158	22.75	27.1776	9.96929	6.53176	17.1392	0.739451
-25.99	-28.79	21.0963	7.84382	3.37683	11.474	0.434699
-158	22.75	26.2876	9.55967	6.08599	16.2103	0.7027
110	-35	17.5441	7.65319	2.22386	10.0078	0.298114
-175	-31.66	22.1937	8.07776	3.8922	12.2744	0.490213
-45.08	-26.18	25.9681	9.41748	5.91766	15.875	0.688022
-13.98	48.06	15.2318	7.96563	1.97105	10.0161	0.256777
-158	22.75	26.4076	9.61383	6.14826	16.3363	0.70803
110	-33.5	18.0637	7.62741	2.33601	10.1085	0.312907
110	-32	19.5172	7.65165	2.75625	10.5993	0.36432
-158	22.75	29.5176	11.0738	7.41511	19.3544	0.792382
-139.45	-14.13	22.9289	8.27812	4.26709	12.8879	0.529275
179.4	4.66	31.855	12.033	7.55085	20.7318	0.744217
-158	22.75	27.3676	10.0586	6.62124	17.3346	0.74636
-127.31	-9.54	23.6392	8.50262	4.64549	13.531	0.567642
169.56	-27.71	22.2767	8.09867	3.93347	12.3407	0.494565
-22.28	9.05	31.7665	12.0024	7.56485	20.7035	0.748516
-158	22.75	29.1576	10.907	7.31683	19.0509	0.789561
-17.51	36.61	16.1252	7.8093	2.02176	9.92808	0.267974
-41.35	-29.31	18.9235	7.62427	2.56604	10.3617	0.341607
-74.8	24.03	22.5677	8.17547	4.0804	12.5793	0.509955
-57.29	-50.99	8.42938	9.71484	2.83851	12.5644	0.316733
-158	22.75	28.9976	10.832	7.26795	18.9105	0.787592
-26.4	-0.19	30.7558	11.6164	7.60888	20.233	0.78275
-158	22.75	26.3876	9.60477	6.13792	16.3153	0.707149
-24.02	5.17	31.4915	11.904	7.5974	20.6015	0.760469
-55	-43.58	8.51702	9.69804	2.82449	12.5339	0.315329
170	-28.42	22.7495	8.22613	4.17381	12.733	0.519653
-165.8	-18.5	25.8757	9.37696	5.86838	15.7782	0.683656
-30	38.48	24.993	9.00529	5.38827	14.8628	0.639725
110	-33.5	18.0837	7.62677	2.34074	10.1132	0.313515
-158	22.75	26.4076	9.61383	6.14826	16.3363	0.70803
-42.65	-29.33	22.8279	8.2486	4.21444	12.8002	0.523852
-18.21	47.37	19.7273	7.66721	2.82948	10.6956	0.372887
-8.77	42.36	18.8843	7.62332	2.55437	10.3478	0.340189
168.7	-26.35	21.9778	8.02543	3.78621	12.1055	0.478975
-57.29	-50.99	8.46938	9.70723	2.83215	12.5506	0.316094
-165.92	-18.43	25.0357	9.02258	5.41177	14.9066	0.641929
110	-38	13.9791	8.24662	1.99211	10.2976	0.250835
-8.36	43.37	18.3196	7.62126	2.39875	10.1726	0.320911
-18.98	8.82	30.7525	11.6151	7.6087	20.2311	0.78282
-158	22.75	26.8476	9.81545	6.37116	16.7968	0.726617
-158	22.75	28.8576	10.7661	7.2227	18.7849	0.785525
164.65	-19.22	26.4505	9.63329	6.17039	16.3813	0.709911
17.94	-34.94	15.6915	7.88006	1.98998	9.95817	0.261794
-28.94	29.18	25.8658	9.37263	5.86308	15.7679	0.683185
-178.98	-33.72	22.8368	8.25119	4.21908	12.808	0.524331
-16.98	39.96	24.0305	8.63842	4.85859	13.9035	0.588776
-78.43	29.08	22.2922	8.10263	3.94121	12.3532	0.49538
-158	22.75	30.0676	11.322	7.53082	19.7795	0.792036
-158	22.75	26.4076	9.61383	6.14826	16.3363	0.70803
-18.98	8.82	30.9425	11.6924	7.61583	20.3388	0.77837
-78.13	28.68	22.9422	8.28204	4.27404	12.8995	0.529989
-158	22.75	26.4076	9.61383	6.14826	16.3363	0.70803
-132.65	-11.76	21.1211	7.84821	3.3878	11.4904	0.435904
-18.21	47.37	19.7073	7.6656	2.82238	10.6862	0.37206
-158	22.75	25.9476	9.40847	5.90675	15.8536	0.687058
-8.4	43.39	17.7296	7.64197	2.26157	10.0393	0.30317
-7.6	48.12	23.0986	8.32908	4.35628	13.0373	0.538413
-158	22.75	26.2176	9.52826	6.04942	16.1369	0.699542
-16.08	5.86	27.5138	10.1277	6.68844	17.4839	0.751418
-158	22.75	26.3976	9.6093	6.14309	16.3258	0.70759
-30	41.19	23.8428	8.57226	4.75609	13.7234	0.578653
-14.3	-7.23	26.1364	9.492	6.00677	16.0516	0.695838
-158	22.75	29.2276	10.9396	7.33724	19.1114	0.790287
-20	47.01	17.104	7.68857	2.14489	9.95296	0.287144
174.27	-20.75	25.5148	9.22142	5.67376	15.4013	0.66614
-158	22.75	29.1676	10.9117	7.31979	19.0596	0.78967
-21.76	30.05	23.2219	8.36718	4.4216	13.1477	0.545069
-165.88	-18.46	24.8957	8.96626	5.33474	14.7636	0.634686
-30	41.19	23.8528	8.57574	4.76154	13.733	0.579194
-31.27	43.6	23.3918	8.42112	4.51226	13.3019	0.554254
-76.61	15.41	22.2762	8.09855	3.93323	12.3403	0.49454
-18.25	-10.9	26.3074	9.56858	6.0963	16.2311	0.703586
-169.13	-28.55	19.8076	7.67398	2.85829	10.7341	0.376235
-158	22.75	30.0776	11.3264	7.53251	19.7867	0.791974
-79.28	10.57	21.8832	8.00347	3.74045	12.0332	0.474096
-16.98	39.96	24.0205	8.63484	4.85311	13.8939	0.588237
-146.93	-16.95	20.851	7.80263	3.27032	11.3158	0.422931
-38.7	-27.32	18.0647	7.62738	2.33626	10.1088	0.312938
-79.3	30.23	22.5126	8.16052	4.05233	12.5334	0.507027
-28.21	-3.92	30.1959	11.3784	7.5513	19.8711	0.791084
-20.66	12.75	24.6132	8.85528	5.17904	14.478	0.619883
179	16	28.4953	10.5945	7.09553	18.4499	0.778767
-41.7	42.85	22.9515	8.2848	4.27892	12.9076	0.530489
-158	22.75	29.5376	11.083	7.42007	19.3707	0.79247
-158	22.75	24.1876	8.69521	4.94473	14.0563	0.597219
110	-32	19.5172	7.65165	2.75625	10.5993	0.36432
-30	41.19	23.8428	8.57226	4.75609	13.7234	0.578653
167.43	-24.27	20.3452	7.73081	3.06199	11.0151	0.399575
-158	22.75	29.5676	11.0967	7.4274	19.3951	0.79259
-30	36.78	25.2799	9.12276	5.54567	15.1577	0.654388
-77.39	15.45	21.9945	8.02937	3.79433	12.1183	0.479839
-35.52	-19.91	26.3823	9.60235	6.13515	16.3097	0.706913
-158	22.75	29.5676	11.0967	7.4274	19.3951	0.79259
-171.8	-29.96	21.0059	7.82816	3.33718	11.4148	0.430331
-26.4	-0.19	30.7358	11.6082	7.60775	20.2212	0.78317
-8.36	43.37	18.1096	7.62598	2.34692	10.1193	0.31431
-34.76	-18.27	28.2718	10.4881	7.01034	18.2365	0.77364
167.37	-24.2	20.8352	7.80012	3.26359	11.3059	0.422184
-78.98	29.8	22.7529	8.22708	4.17554	12.7358	0.519832
172.86	-32.85	22.3595	8.11997	3.97492	12.4076	0.498924
-35.52	-19.91	26.3823	9.60235	6.13515	16.3097	0.706913
-153.42	23.91	25.6539	9.28082	5.74912	15.5463	0.672973
-158	22.75	28.6576	10.6715	7.15423	18.6017	0.782039
-21	21.95	28.2243	10.4655	6.99164	18.1907	0.772462
18.07	-34.89	15.6815	7.88181	1.9894	9.95915	0.261668
-34.76	-18.27	28.2918	10.4976	7.01816	18.2558	0.774127
-175.96	-32.17	21.9307	8.01442	3.76337	12.0693	0.476541
110	-32	19.5172	7.65165	2.75625	10.5993	0.36432
-158	22.75	27.3676	10.0586	6.62124	17.3346	0.74636
-132.76	23.58	23.1144	8.33389	4.36459	13.0513	0.539261
-158	22.75	25.4676	9.20144	5.64811	15.3523	0.6638
-29.61	66.65	6.44867	9.92793	3.04339	12.9764	0.340393
-14.84	-8.02	26.0846	9.46899	5.97946	15.9973	0.693453
-158	22.75	25.1076	9.05182	5.45126	14.9803	0.645622
-30	55.25	14.5499	8.11068	1.96987	10.1482	0.252176
170.3	-28.88	22.5447	8.16921	4.06868	12.5601	0.508732
-176.22	-32.3	22.9733	8.29129	4.29036	12.9267	0.531664
-158	22.75	29.1976	10.9257	7.32857	19.0856	0.789986
-34.76	-18.27	28.2718	10.4881	7.01034	18.2365	0.77364
-41.48	42.85	23.4815	8.45028	4.56042	13.3844	0.559109
-22.28	9.05	29.9465	11.2681	7.50914	19.6902	0.792623
172.86	-32.83	22.2995	8.10449	3.94485	12.359	0.495763
-20	20.41	23.7633	8.54479	4.71279	13.6479	0.574354
-174.92	-31.62	22.4422	8.14168	4.0166	12.4752	0.503292
-8.77	48.95	14.9612	8.02073	1.96683	10.0621	0.254551
-158	22.75	27.5176	10.1295	6.69017	17.4878	0.751547
-75.35	34.73	22.517	8.1617	4.05457	12.5371	0.507261
-74.03	20.42	22.6172	8.18906	4.10572	12.6208	0.51259
-158	22.75	29.4776	11.0554	7.40502	19.3216	0.792182
-74.71	18.8	22.3057	8.10608	3.94797	12.3641	0.496091
-74.02	20.12	22.4037	8.13152	3.99717	12.4437	0.501257
-158	22.75	29.3076	10.9768	7.35981	19.1796	0.791013
-54.73	-43.43	10.507	9.21448	2.46397	11.7008	0.282126
-8.44	43.42	15.9292	7.84003	2.0057	9.93865	0.265006
-17.51	36.61	18.9852	7.62598	2.58463	10.384	0.343861
-28.48	5.92	31.7184	11.9856	7.57172	20.6872	0.750755
-158	22.75	28.9976	10.832	7.26795	18.9105	0.787592
-155.15	-20.75	17.2905	7.67209	2.17656	9.97284	0.291617
-57.29	-50.99	8.46938	9.70723	2.83215	12.5506	0.316094
-74.65	22.83	22.732	8.22116	4.16476	12.718	0.518717
-158	22.75	28.4676	10.5813	7.08524	18.4237	0.77817
-25.99	-28.79	21.0763	7.8403	3.36802	11.4608	0.433729
-144.41	26.15	25.2012	9.0902	5.50259	15.0765	0.650399
-8.77	48.95	14.9612	8.02073	1.96683	10.0621	0.254551
-8.1	48.75	13.1529	8.46215	2.05823	10.5681	0.252668
-158	22.75	27.3676	10.0586	6.62124	17.3346	0.74636
-158	22.75	29.5576	11.0922	7.42497	19.387	0.792552
-27.34	-2.02	29.5966	11.11	7.43438	19.4185	0.792689
-175.07	-31.7	22.2337	8.08778	3.91206	12.3062	0.492309
-18.98	8.82	30.9225	11.6843	7.61539	20.3279	0.778879
-8.44	43.42	15.9292	7.84003	2.0057	9.93865	0.265006
-152.66	-19.32	18.3881	7.62035	2.41636	10.1913	0.32313
-49.59	-35.71	14.1173	8.2126	1.98487	10.2584	0.250957
-8.5	43.45	20.0692	7.69912	2.95505	10.8658	0.387391
177	-30	24.8061	8.93068	5.28539	14.6726	0.630017
-57.29	-50.99	8.41938	9.71672	2.84009	12.5678	0.316892
-8.77	48.95	14.9412	8.02493	1.96671	10.0659	0.254408
-158	22.75	25.6376	9.27383	5.74032	15.5293	0.672178
-21.79	26.54	24.7163	8.89534	5.23585	14.5817	0.625308
-35.95	-30.9	17.2507	7.67542	2.16959	9.96819	0.290642
-29.94	65.88	3.93551	9.50729	2.73545	12.2445	0.322817
-46.19	-32.61	20.1343	7.70612	2.97983	10.9	0.390227
-151.02	-18.35	19.2362	7.63565	2.6631	10.4805	0.353288
-158	22.75	25.1376	9.06409	5.46773	15.0111	0.647157
-153	-19.5	18.1581	7.62463	2.35858	10.1311	0.315805
-34	25.8	28.8868	10.7799	7.23232	18.8113	0.785982
-123.78	29.61	19.5576	7.65441	2.7701	10.6174	0.365947
-21.57	-13.67	25.1356	9.06326	5.46662	15.009	0.647054
-158	22.75	26.2276	9.53274	6.05465	16.1474	0.699995
168.75	-26.43	21.9678	8.02308	3.78135	12.0978	0.478458
-16.98	39.96	22.7805	8.23497	4.18984	12.7595	0.521311
-127.81	26.55	22.1398	8.06442	3.86557	12.2317	0.487397
-42.65	-29.33	22.7479	8.22567	4.17297	12.7316	0.519567
-46.19	-32.61	20.2043	7.71397	3.00678	10.9375	0.393303
-27.34	-2.02	29.7866	11.1963	7.47717	19.5686	0.792947
-41.35	-29.31	16.8435	7.71517	2.10507	9.93342	0.281335
-154.23	-20.22	17.6859	7.64441	2.25245	10.0314	0.301957
-158	22.75	29.4776	11.0554	7.40502	19.3216	0.792182
-178	-15	26.9234	9.85062	6.4086	16.8757	0.729655
-20.42	35.67	19.723	7.66686	2.82795	10.6936	0.372709
-16.93	5.1	29.8556	11.2275	7.49144	19.6216	0.792869
-35.95	-30.9	21.6407	7.94986	3.62505	11.8527	0.461715
-25.78	1.29	29.158	10.9072	7.31695	19.0513	0.789565
-158	22.75	30.0776	11.3264	7.53251	19.7867	0.791974
172.13	-31.73	22.5601	8.17339	4.07653	12.573	0.509551
-30.95	-10.03	29.4335	11.0351	7.39366	19.2852	0.791929
-10.64	47.96	17.876	7.63469	2.29314	10.0676	0.307336
-17.45	-10.23	26.5113	9.66094	6.2016	16.4451	0.712551
-54.73	-43.43	8.57702	9.68626	2.81473	12.5126	0.314358
-30	50.84	16.8906	7.71005	2.1119	9.93625	0.282349
-179.8	-34.13	22.5439	8.16898	4.06825	12.5594	0.508688
-77.68	28.03	22.6796	8.20639	4.13773	12.6734	0.515914
-158	22.75	28.4776	10.5861	7.08896	18.4331	0.778387
-158	22.75	29.6576	11.1378	7.44868	19.4673	0.792847
-158	22.75	28.8176	10.7472	7.20936	18.7486	0.784878
-158	22.75	26.9676	9.87117	6.43028	16.9217	0.731401
-158	22.75	25.4576	9.19721	5.64267	15.3419	0.663303
-29.94	65.88	3.68551	9.40713	2.65179	12.0606	0.316352
-27.34	-2.02	29.7066	11.1601	7.45978	19.5061	0.792922
-74.61	23.61	22.76	8.22912	4.17924	12.7419	0.520215
-19.87	28.68	24.2945	8.73456	5.00346	14.1611	0.602941
-144.41	26.15	25.3112	9.13579	5.5628	15.1901	0.655969
-21.18	22.96	27.6769	10.205	6.76162	17.6491	0.756785
179.4	4.66	31.795	12.0124	7.56052	20.7129	0.747152
-74.46	21.5	22.5611	8.17365	4.077	12.5738	0.509601
-170.5	-29.28	20.3453	7.73082	3.06202	11.0151	0.399579
-42.37	-30.09	17.2719	7.67363	2.17329	9.97064	0.29116
47.48	-11.6	27.0727	9.92017	6.48139	17.0307	0.735482
-16.93	5.1	29.8156	11.2094	7.48326	19.591	0.792926
-21.57	-13.67	25.4956	9.21328	5.66332	15.3814	0.665189
173.73	-34.13	22.1468	8.06613	3.869	12.2372	0.48776
-34.8	43.42	22.9821	8.29389	4.29493	12.9344	0.532133
-14.89	1.35	25.5643	9.2425	5.70065	15.4529	0.668585
-79.45	10.25	21.81	7.98686	3.70529	11.9779	0.470335
-123.78	29.61	19.5576	7.65441	2.7701	10.6174	0.365947
-29.76	-7.48	30.3187	11.4318	7.56843	19.9559	0.789849
-150.15	-17.85	19.8347	7.67636	2.86809	10.7473	0.377371
-8.92	42.15	17.5165	7.65505	2.21848	10.0036	0.297385
-42.65	-29.33	22.7779	8.23423	4.1885	12.7573	0.521173
-75.35	17.65	22.4705	8.14922	4.03097	12.4986	0.504795
-158	22.75	24.8876	8.96302	5.33027	14.7554	0.634264
-8.4	43.39	20.2696	7.72161	3.03221	10.9731	0.396197
179	11	30.2664	11.4091	7.56143	19.9201	0.790415
169.75	-28.03	22.1287	8.0617	3.86009	12.223	0.486818
-19.49	9.71	27.8233	10.2746	6.82555	17.7959	0.761338
-158	22.75	28.4976	10.5956	7.09638	18.452	0.778816
-21.18	22.96	27.6869	10.2098	6.76604	17.6591	0.757104
-30.95	-10.03	29.4235	11.0305	7.39105	19.2769	0.791866
-144.41	26.15	25.2412	9.10672	5.5245	15.1178	0.65243
-25.03	44.22	23.8583	8.57763	4.76449	13.7381	0.579487
-8.77	42.36	16.4043	7.7692	2.04955	9.92182	0.272702
-21.79	26.54	24.6963	8.88752	5.22482	14.5616	0.624258
-153.58	-19.85	18.0568	7.62764	2.3344	10.107	0.312699
-173.17	-30.7	21.551	7.931	3.58306	11.7877	0.457182
-46.19	-32.61	20.1943	7.71283	3.00291	10.9321	0.392862
-127.81	26.55	21.3698	7.89459	3.49959	11.6596	0.448128
-19.87	28.68	15.9345	7.83918	2.00609	9.93831	0.265082
-123.78	29.61	19.5576	7.65441	2.7701	10.6174	0.365947
-8.83	42.22	18.7043	7.6203	2.50221	10.2869	0.333806
-177.61	-33	22.8564	8.25687	4.22926	12.8249	0.52538
-8.36	43.37	21.7596	7.97566	3.68127	11.9403	0.46776
-29.01	36.16	20.0327	7.69532	2.94128	10.8468	0.385811
-158	22.75	25.9476	9.40847	5.90675	15.8536	0.687058
-46.6	-33.15	15.2207	7.96782	1.97078	10.0178	0.256675
-8.86	42.22	18.1243	7.62556	2.35043	10.1229	0.314761
-162.56	-24.95	17.1276	7.68636	2.14875	9.9552	0.287696
-21.26	30.91	22.0439	8.04113	3.81843	12.1566	0.4824
-165.25	-26.43	17.9645	7.63097	2.31304	10.0863	0.309933
-17.45	-10.23	26.3613	9.59289	6.12431	16.2877	0.705986
-158	22.75	26.5476	9.67749	6.22015	16.4831	0.714113
-12.45	46.08	23.7418	8.53745	4.70115	13.6276	0.573196
-42.91	-29.85	18.8719	7.62304	2.5507	10.3434	0.339743
-144.41	26.15	25.3112	9.13579	5.5628	15.1901	0.655969
169	-26.83	21.6704	7.9562	3.63899	11.8744	0.463216
-78.68	29.42	22.3916	8.12835	3.99108	12.4338	0.500619
110	-18.4	20.3087	7.72632	3.04757	10.9947	0.39794
-8.37	43.36	21.2896	7.87918	3.46317	11.6042	0.444158
-158	22.75	26.6276	9.71408	6.26084	16.5669	0.717521
-8.36	43.37	18.4296	7.61996	2.42722	10.2031	0.324494
-158	22.75	29.6476	11.1333	7.44637	19.4593	0.792826
-158	22.75	28.6776	10.681	7.16127	18.6202	0.782416
-8.44	43.42	17.7292	7.64199	2.26148	10.0392	0.303159
-78.85	11.33	22.236	8.08835	3.91318	12.308	0.492427
-17.05	32.43	19.141	7.63147	2.63282	10.4428	0.349665
-74.02	20.07	22.4837	8.15274	4.03763	12.5095	0.505491
-131.85	24.13	22.7406	8.2236	4.1692	12.7253	0.519176
-21.97	27.25	27.2144	9.98657	6.54929	17.1772	0.740819
170.5	-29.2	22.4517	8.14421	4.02144	12.4831	0.503798
18.01	-33.62	12.4569	8.6561	2.14105	10.8367	0.257347
-177.23	-32.81	22.5743	8.17726	4.08376	12.5848	0.510305
-131.85	24.13	22.7406	8.2236	4.1692	12.7253	0.519176
-123.78	29.61	19.5676	7.65511	2.77354	10.6219	0.366351
-163	-18.41	26.2194	9.52908	6.05038	16.1388	0.699626
-135.41	-12.72	23.1013	8.32991	4.3577	13.0397	0.538558
-102.35	17.68	20.2984	7.72507	3.04351	10.989	0.39748
-158	22.75	28.1576	10.4337	6.96499	18.1259	0.770756
-24.02	5.17	31.6615	11.9655	7.5792	20.667	0.753324
-131.85	24.13	22.7406	8.2236	4.1692	12.7253	0.519176
-35.52	-19.91	26.3723	9.59783	6.12997	16.2992	0.706471
179	11	30.2664	11.4091	7.56143	19.9201	0.790415
-23.22	44.46	24.1947	8.69781	4.94864	14.0632	0.5976
-127.81	26.55	21.3398	7.88878	3.48593	11.6388	0.44664
-38.7	-27.32	19.4947	7.65017	2.7486	10.5894	0.36342
-23.12	44.37	23.9885	8.62344	4.83559	13.863	0.586512
-75.53	25.07	22.5095	8.15967	4.05073	12.5308	0.50686
-158	22.75	26.3676	9.59573	6.12757	16.2943	0.706265
-134.89	24.27	23.5865	8.48498	4.617	13.4818	0.56479
-131.85	24.13	22.7306	8.22076	4.16404	12.7168	0.518642
-158	22.75	27.0376	9.90379	6.46439	16.9944	0.734131
-49.89	34.1	21.259	7.87342	3.44938	11.5833	0.442652
-35.15	-24.6	21.8266	7.9906	3.71324	11.9904	0.471186
-31.46	-11.24	30.2292	11.3929	7.55618	19.8944	0.790781
-54.02	41.83	24.1175	8.66972	4.90628	13.9879	0.593457
-29.12	-5.92	29.9191	11.2559	7.50393	19.6697	0.792714
-29.27	-6.48	28.3533	10.527	7.04199	18.3149	0.775592
-155.55	-20.96	17.1105	7.68796	2.14595	9.95357	0.287296
-74.46	21.5	22.7211	8.21807	4.15911	12.7087	0.518131
-29.12	-5.92	29.9591	11.2738	7.5115	19.6996	0.792575
-24.08	-15.75	25.0359	9.02265	5.41187	14.9067	0.641939
-8.36	43.37	21.8196	7.98903	3.70991	11.9852	0.47083
-158	22.75	25.7576	9.32556	5.80503	15.6546	0.678002
-19.24	12.79	19.0084	7.62669	2.59169	10.3925	0.344715
-20.66	12.75	30.6132	11.5572	7.59932	20.147	0.785541
-21.76	30.05	23.5519	8.47349	4.59835	13.4496	0.56292
-30	45.36	21.3535	7.89141	3.49212	11.6482	0.447315
-35.95	-30.9	16.6807	7.73386	2.08281	9.92602	0.277966
-21.26	30.91	22.0639	8.04593	3.82822	12.1722	0.48344
-165.88	-18.46	26.7057	9.74995	6.30029	16.6486	0.720797
177	-30	25.1561	9.07169	5.4779	15.0302	0.648104
-143.38	-15.78	22.3019	8.1051	3.94604	12.361	0.495888
-159.32	-23.12	16.3985	7.76998	2.04891	9.92185	0.272598
-153.78	-19.96	18.0053	7.62943	2.3224	10.0953	0.311147
-158	22.75	25.9776	9.42167	5.92271	15.885	0.688468
-32.86	-14.11	28.4134	10.5556	7.0649	18.3723	0.776971
-132.76	23.58	22.9944	8.29756	4.30138	12.9452	0.532794
-158	22.75	27.7976	10.2624	6.81447	17.7703	0.760559
-30	46.74	21.3009	7.88133	3.46829	11.612	0.444717
-160	-18.27	27.2386	9.99794	6.56076	17.2022	0.741711
-74.33	21.17	22.5988	8.18398	4.09627	12.6053	0.511607
-34.84	-31.37	15.5117	7.91228	1.98079	9.9777	0.259645
-158	22.75	29.5676	11.0967	7.4274	19.3951	0.79259
-27.45	-2.39	28.3449	10.5229	7.03873	18.3068	0.775393
-20	24.51	30.6613	11.5773	7.60295	20.1765	0.784652
-18.98	8.82	23.8225	8.5652	4.74499	13.704	0.577553
-158	22.75	26.5476	9.67749	6.22015	16.4831	0.714113
-161.1	-24.13	16.6238	7.74078	2.07549	9.9243	0.276835
-46.6	-33.15	15.2507	7.96191	1.97154	10.0132	0.256953
-158	22.75	26.6876	9.74162	6.29117	16.6297	0.720042
-158	22.75	25.6176	9.26526	5.7295	15.5084	0.6712
-29.12	-5.92	29.8891	11.2425	7.4981	19.647	0.792797
-74.65	22.7	22.582	8.17937	4.0877	12.5913	0.510715
-20.42	35.67	19.713	7.66606	2.8244	10.6889	0.372296
-74.65	22.46	22.822	8.2469	4.21137	12.7952	0.523535
-132.76	23.58	22.9944	8.29756	4.30138	12.9452	0.532794
-77.32	27.55	22.9197	8.2754	4.26228	12.8799	0.52878
-19.87	28.68	26.8045	9.79549	6.34972	16.7518	0.724866
-158	22.75	29.0376	10.8508	7.28046	18.9459	0.788124
-132.76	23.58	22.9944	8.29756	4.30138	12.9452	0.532794
-32.86	-14.11	28.4134	10.5556	7.0649	18.3723	0.776971
-74.73	18.74	22.6557	8.19973	4.12546	12.6532	0.514641
-39.6	-26.62	20.64	7.77052	3.18153	11.1862	0.413035
-158	22.75	24.5976	8.84925	5.17044	14.4624	0.619058
-17.44	5.98	30.0166	11.2994	7.52197	19.7422	0.792319
-158	22.75	24.7876	8.92336	5.27517	14.6538	0.629048
-158	22.75	26.4876	9.65014	6.18944	16.4202	0.711525
-158	22.75	27.1376	9.95054	6.51263	17.0979	0.737951
-158	22.75	25.5476	9.23537	5.69158	15.4355	0.667761
-170.08	-29.07	20.2681	7.72142	3.0316	10.9723	0.396127
-170.9	-29.5	20.9334	7.81601	3.30574	11.3681	0.426857
-163.81	-25.65	17.3284	7.669	2.18332	9.97749	0.292558
-171.05	-29.56	20.5034	7.75137	3.12548	11.1054	0.406744
-77.18	27.35	22.8126	8.24419	4.20649	12.7871	0.523031
-20.78	-13.03	26.0299	9.44472	5.95046	15.9398	0.69091
-158	22.75	26.9876	9.88048	6.44005	16.9425	0.732186
-8.77	48.95	14.0612	8.22633	1.98767	10.2741	0.250892
-158	22.75	26.4776	9.6456	6.18431	16.4097	0.711091
-2.63	-5.86	24.0825	8.65709	4.88709	13.9539	0.591576
-158	22.75	23.5976	8.48869	4.62301	13.4922	0.565392
-31.52	-21.74	23.4134	8.4281	4.52384	13.3217	0.555423
-75.27	24.68	22.7789	8.2345	4.18899	12.7581	0.521224
-14.89	1.35	25.7443	9.31981	5.79789	15.6407	0.677362
-161.64	-24.43	17.0314	7.69556	2.13328	9.94655	0.285474
-165.92	-18.43	26.5957	9.69948	6.24466	16.5335	0.716169
-54.4	-43.48	11.8976	8.81666	2.22246	11.073	0.262918
-43.33	42.71	23.4493	8.43977	4.54312	13.3547	0.557367
-158	22.75	25.7576	9.32556	5.80503	15.6546	0.678002
-158	22.75	28.2476	10.4766	7.00084	18.2132	0.773044
-8.36	43.37	18.2396	7.62271	2.37862	10.1515	0.318359
-8.44	43.42	15.0292	8.00656	1.96742	10.0497	0.255061
-30	45.36	21.6035	7.94196	3.60756	11.8256	0.459829
-20.42	35.67	18.483	7.61963	2.44134	10.2185	0.326261
-30	49.44	18.0979	7.62633	2.34413	10.1166	0.313951
-55	-43.58	7.81702	9.8172	2.92743	12.7534	0.325956
-36.63	-22.15	26.9902	9.88167	6.4413	16.9451	0.732286
-21.19	31.57	26.8578	9.82017	6.37621	16.8074	0.727028
-8.89	42.17	17.2265	7.6775	2.1654	9.96546	0.290053
-8.5	43.45	19.9592	7.68796	2.91381	10.8092	0.382652
-28.24	-19.13	25.0366	9.02292	5.41223	14.9074	0.641973
-33.31	-15.17	29.8941	11.2447	7.49908	19.6508	0.792785
-30	45.36	21.4235	7.90514	3.52412	11.6971	0.450795
-8.77	48.95	14.4412	8.13561	1.97252	10.174	0.251749
-14.05	43.92	23.4846	8.4513	4.5621	13.3873	0.559277
-27.45	-2.39	28.3349	10.5182	7.03487	18.2972	0.775157
-28.24	-19.13	24.7566	8.91114	5.25807	14.6224	0.627423
-45.79	-26.72	26.2741	9.55358	6.07893	16.1961	0.702091
-158	22.75	25.0276	9.01929	5.40731	14.8982	0.641511
-55.94	-47.62	7.96676	9.79474	2.90731	12.7113	0.323812
-75.7	25.3	22.8795	8.26359	4.24128	12.8449	0.526618
-165.8	-18.5	26.5857	9.6949	6.23958	16.523	0.715743
-15.35	2.16	26.2409	9.53868	6.06159	16.1613	0.700595
-158	22.75	28.2476	10.4766	7.00084	18.2132	0.773044
-158	22.75	29.0476	10.8555	7.28355	18.9547	0.788253
-102.35	17.68	25.0884	9.04399	5.44072	14.9606	0.644638
-158	22.75	26.4676	9.64105	6.17917	16.3992	0.710656
-165.8	-18.5	26.5857	9.6949	6.23958	16.523	0.715743
-165.8	-18.5	26.5857	9.6949	6.23958	16.523	0.715743
-21.76	30.05	23.7919	8.55465	4.72838	13.675	0.575903
-76.45	26.33	22.8296	8.2491	4.21532	12.8017	0.523943
-20.78	-13.03	25.6299	9.27051	5.73613	15.5212	0.671799
-77.88	28.33	22.4896	8.15432	4.04062	12.5143	0.505804
-172.17	-30.17	21.0259	7.83157	3.34592	11.4278	0.431294
-21.76	30.05	23.8219	8.56501	4.7447	13.7035	0.577524
-29.61	66.65	6.72867	9.92077	3.03143	12.9579	0.338373
-76.93	27.02	22.7226	8.2185	4.1599	12.71	0.518213
-39.6	-26.62	20.73	7.78385	3.21909	11.2408	0.417231
110	-11.5	25.4266	9.18413	5.62578	15.3097	0.661757
-161.37	-24.27	16.6838	7.7335	2.08321	9.92613	0.278028
-158	22.75	27.0576	9.91313	6.47409	17.0151	0.734903
-74.12	21.81	22.9011	8.26992	4.25254	12.8636	0.527778
-162.53	-24.93	16.9476	7.70404	2.12037	9.94008	0.283595
-21.78	26.22	27.3886	10.0685	6.63097	17.3561	0.7471
-158	22.75	25.9776	9.42167	5.92271	15.885	0.688468
-158	22.75	29.0576	10.8602	7.28664	18.9635	0.78838
-158	22.75	26.2776	9.55517	6.08078	16.1998	0.702251
174.14	-34.74	22.3399	8.11489	3.96509	12.3917	0.497891
-163	-18.41	26.6894	9.74247	6.29209	16.6316	0.720119
-16.93	5.1	29.8256	11.214	7.48533	19.5987	0.792915
-158	22.75	26.9676	9.87117	6.43028	16.9217	0.731401
-35.95	-30.9	22.0307	8.03799	3.81201	12.1464	0.481719
-160	-18.27	27.2486	10.0026	6.56549	17.2125	0.742077
-8.44	43.42	15.8292	7.85651	1.99858	9.94598	0.263603
-165.92	-18.43	26.7557	9.77299	6.32538	16.7009	0.722868
-158	22.75	26.3176	9.57317	6.10161	16.2418	0.704042
-140.92	-14.71	22.8532	8.25592	4.22757	12.8221	0.525206
-158	22.75	25.1076	9.05182	5.45126	14.9803	0.645622
-165.92	-18.43	26.6257	9.71322	6.25989	16.5649	0.717441
-158	22.75	25.5576	9.23963	5.697	15.4459	0.668253
-158	22.75	26.8676	9.82472	6.38107	16.8176	0.727424
-158	22.75	26.3176	9.57317	6.10161	16.2418	0.704042
-163	-18.41	26.6794	9.73787	6.28705	16.6211	0.719701
-34.13	-23.8	22.9629	8.2882	4.28491	12.9176	0.531104
-158	22.75	26.9776	9.87582	6.43517	16.9321	0.731794
-36.96	-22.92	22.7432	8.22433	4.17052	12.7275	0.519313
-29.27	-6.48	28.3333	10.5174	7.03429	18.2958	0.775122
177.35	-35.56	22.376	8.12427	3.98323	12.4211	0.499796
-21.19	31.57	26.5178	9.66389	6.20491	16.4519	0.712831
-163	-18.41	26.7594	9.7747	6.32724	16.7048	0.723021
-160	-18.27	27.2486	10.0026	6.56549	17.2125	0.742077
-32.93	43.51	23.0819	8.32397	4.34743	13.0225	0.537509
-36.63	-22.15	27.0002	9.88633	6.44618	16.9555	0.732677
-36.63	-22.15	27.0502	9.90965	6.47049	17.0074	0.734616
-64.25	31.7	22.8541	8.25619	4.22804	12.8228	0.525254
-58.06	-47.21	6.74678	9.92001	3.03042	12.9562	0.338223
-165.88	-18.46	26.7157	9.75456	6.30532	16.6591	0.721213
-19.99	42.9	21.7602	7.97579	3.68155	11.9407	0.46779
-31.46	-11.24	30.1792	11.3711	7.54878	19.8594	0.791228
-158	22.75	26.8976	9.83863	6.39589	16.8489	0.728626
-10.64	47.96	20.936	7.81643	3.30683	11.3697	0.426978
-35.15	-24.6	21.5266	7.92597	3.57172	11.7702	0.455956
-70.03	39.23	16.6674	7.73547	2.08107	9.92558	0.277699
171.17	-30.23	22.5238	8.16353	4.05801	12.5427	0.50762
-165.88	-18.46	26.7157	9.75456	6.30532	16.6591	0.721213
-158	22.75	26.8876	9.83399	6.39095	16.8384	0.728226
-158	22.75	29.0476	10.8555	7.28355	18.9547	0.788253
-18.21	47.37	17.7273	7.64209	2.26107	10.0389	0.303104
-36.08	-30.08	21.5444	7.92963	3.57999	11.783	0.45685
-21.97	27.25	27.2144	9.98657	6.54929	17.1772	0.740819
-8.44	43.42	18.3292	7.62111	2.4012	10.1752	0.321221
-156.07	-21.28	16.8259	7.71712	2.10257	9.93244	0.280961
-158	22.75	28.2576	10.4814	7.00478	18.2229	0.773292
-158	22.75	25.8076	9.34726	5.83189	15.7069	0.680405
-154.78	-20.53	17.319	7.66976	2.18163	9.97632	0.292323
-127.81	26.55	21.3398	7.88878	3.48593	11.6388	0.44664
-158	22.75	28.1976	10.4528	6.98102	18.1648	0.771786
-139.21	-8.99	30.2215	11.3896	7.55507	19.8891	0.790853
-50.56	42.12	23.1566	8.34688	4.38693	13.089	0.54154
-31.52	-21.74	23.5434	8.47066	4.59375	13.4417	0.562459
-157.4	-22.03	16.4677	7.76071	2.05667	9.92186	0.273857
-21.4	24.68	27.8176	10.2719	6.82312	17.7903	0.761168
-24.91	-16.43	25.3746	9.16229	5.59743	15.2558	0.659157
-39.19	-26.1	25.3463	9.15043	5.58196	15.2264	0.657735
-158	22.75	25.2176	9.09698	5.51159	15.0935	0.651234
-45.28	-25.77	26.4376	9.62743	6.16374	16.3678	0.709346
-158	22.75	26.3376	9.58219	6.11201	16.2628	0.704933
-71.3	34.68	21.3659	7.89383	3.4978	11.6569	0.447933
-20.01	38.17	24.8438	8.94557	5.30611	14.7108	0.63198
-160	-18.27	27.1986	9.97915	6.54178	17.1609	0.740234
-158	22.75	26.7476	9.76924	6.32132	16.6924	0.722533
-159.78	-23.4	16.5285	7.75277	2.06378	9.92242	0.274995
-36.96	-22.92	22.7632	8.23002	4.18087	12.7446	0.520383
-158	22.75	25.3176	9.13847	5.56631	15.1967	0.656293
-68.07	40.51	23.0428	8.31212	4.32684	12.9879	0.535403
-158	22.75	24.8876	8.96302	5.33027	14.7554	0.634264
-158	22.75	29.0376	10.8508	7.28046	18.9459	0.788124
-158	22.75	29.0976	10.8789	7.29886	18.9986	0.788872
-167.33	-27.56	19.1172	7.63052	2.62535	10.4336	0.348768
-8.44	43.42	20.3092	7.72638	3.04777	10.995	0.397963
-34.13	-23.8	23.1029	8.3304	4.35856	13.0412	0.538646
-158	22.75	29.5176	11.0738	7.41511	19.3544	0.792382
-36.26	-30.94	22.2907	8.10225	3.94048	12.352	0.495304
-66.28	40.46	23.0345	8.30961	4.32245	12.9805	0.534954
-158	22.75	27.8976	10.3099	6.85738	17.87	0.763554
-158	22.75	27.7676	10.2481	6.80144	17.7402	0.759637
-102.35	17.68	29.0484	10.8559	7.2838	18.9554	0.788263
-39.19	-26.1	25.2963	9.12958	5.55464	15.1747	0.655217
-36.96	-22.92	22.9032	8.27053	4.25364	12.8654	0.527891
-158	22.75	28.1976	10.4528	6.98102	18.1648	0.771786
-158	22.75	27.6876	10.2101	6.76635	17.6598	0.757126
-21.4	24.68	28.3676	10.5338	7.04746	18.3286	0.775924
-156.86	-21.73	16.8234	7.71739	2.10221	9.9323	0.280908
-21.4	24.68	28.3476	10.5242	7.03979	18.3094	0.775458
-163.06	-25.22	17.4893	7.65692	2.21324	9.9995	0.296671
-168.53	-28.22	19.4665	7.64836	2.73905	10.5771	0.362295
-8.37	43.36	21.7396	7.97125	3.67176	11.9254	0.46674
-8.36	43.37	21.9096	8.00954	3.75318	12.0532	0.475455
-111.78	-25.83	24.5532	8.83216	5.14593	14.4179	0.616708
-8.37	43.36	18.0996	7.62628	2.34453	10.117	0.314003
-30	46.74	18.7709	7.62116	2.52125	10.3089	0.336144
-101.16	-29.72	22.2564	8.09352	3.92336	12.3244	0.4935
-24.08	-15.75	25.0559	9.03076	5.42286	14.9272	0.642968
-158	22.75	25.9376	9.40408	5.90142	15.8431	0.686586
-158	22.75	28.0876	10.4004	6.9366	18.0575	0.768902
-57.66	41.53	23.5542	8.47423	4.59956	13.4517	0.563041
-27.41	-18.46	25.59	9.25346	5.71456	15.4797	0.669847
-19.99	42.9	22.1102	8.05716	3.85097	12.2084	0.485851
-158	22.75	25.3676	9.15936	5.59362	15.2485	0.658807
-158	22.75	25.5076	9.21838	5.66986	15.3939	0.665784
-10.63	46.86	23.3631	8.4119	4.4969	13.2757	0.552702
-158	22.75	24.8276	8.93917	5.29722	14.6944	0.631138
-158	22.75	28.2276	10.4671	6.99294	18.1939	0.772545
-158	22.75	25.6376	9.27383	5.74032	15.5293	0.672178
-158	22.75	25.4276	9.18456	5.62633	15.3107	0.661808
-37.76	-26.61	20.5789	7.7618	3.15632	11.1497	0.410209
-30	61.91	11.6074	8.90061	2.269	11.2008	0.266363
-155.23	-20.8	17.2705	7.67375	2.17304	9.97047	0.291125
-15.91	44.93	24.23	8.71076	4.96804	14.0978	0.599493
-158	22.75	24.8376	8.94313	5.30272	14.7045	0.63166
-158	22.75	24.8476	8.9471	5.30823	14.7147	0.632181
-158	22.75	23.6576	8.50883	4.65547	13.5483	0.568639
19.39	39.39	20.2372	7.71778	3.01957	10.9554	0.394759
-10.64	47.96	20.976	7.8231	3.32416	11.3954	0.428893
-158	22.75	25.7676	9.32989	5.81041	15.6651	0.678484
-158	22.75	25.6576	9.28242	5.75113	15.5502	0.673154
-8.93	47.56	23.2752	8.38391	4.44993	13.1957	0.547946
-40.71	-27.62	24.2774	8.72823	4.99406	14.1443	0.602028
-30	42.7	18.2337	7.62283	2.37714	10.15	0.318172
-41.35	42.88	23.3315	8.40179	4.48	13.2469	0.550993
-30.88	63.33	10.5032	9.21555	2.46469	11.7026	0.282188
-20.01	38.17	24.8438	8.94557	5.30611	14.7108	0.63198
-37.76	-26.61	21.7189	7.96672	3.66194	11.9101	0.465685
-158	22.75	28.0076	10.3623	6.90362	17.9789	0.766706
-21.19	31.57	26.8478	9.81554	6.37126	16.797	0.726625
-158	22.75	27.6876	10.2101	6.76635	17.6598	0.757126
-35.05	-18.86	25.4351	9.1877	5.63039	15.3185	0.66218
-8.44	43.42	20.5592	7.75904	3.14824	11.1381	0.409303
-30	45.36	21.1935	7.86127	3.41998	11.5388	0.439434
-27.45	-2.39	28.3549	10.5277	7.04257	18.3164	0.775627
-17.71	44.78	24.3147	8.74208	5.0146	14.1811	0.604024
47.51	-11.81	26.7403	9.7659	6.31768	16.6848	0.722234
-158	22.75	24.9876	9.00312	5.38531	14.8573	0.639447
-158	22.75	25.9776	9.42167	5.92271	15.885	0.688468
-19.99	42.9	22.3902	8.12798	3.99038	12.4327	0.500545
-158	22.75	25.3676	9.15936	5.59362	15.2485	0.658807
-158	22.75	23.7676	8.54628	4.71515	13.652	0.574588
-158	22.75	25.0476	9.02739	5.4183	14.9187	0.642541
-59.08	41.42	23.5595	8.476	4.60244	13.4567	0.563331
-57.89	-51.93	7.30821	9.8795	2.9862	12.8729	0.332544
-39.19	-26.1	25.2863	9.12542	5.54917	15.1643	0.654712
-31.24	-10.78	27.9034	10.3127	6.85983	17.8757	0.763723
-40.71	-27.62	24.2674	8.72453	4.98856	14.1345	0.601493
32.89	33.92	23.9125	8.5966	4.79408	13.79	0.582415
-102.35	17.68	21.2484	7.87143	3.4446	11.576	0.442129
-158	22.75	28.0376	10.3766	6.91605	18.0084	0.767539
-158	22.75	24.9076	8.97101	5.34128	14.7757	0.635303
-158	22.75	24.5276	8.82237	5.13185	14.3923	0.615355
-11.8	46.37	23.5224	8.46372	4.58244	13.4222	0.561322
-57.89	-51.93	7.26821	9.88342	2.99012	12.8806	0.333009
-158	22.75	29.4376	11.037	7.39473	19.2886	0.791954
-32.81	43.58	23.7936	8.55521	4.72927	13.6766	0.575992
-158	22.75	24.5276	8.82237	5.13185	14.3923	0.615355
-53.37	41.88	23.6399	8.50286	4.64588	13.5317	0.567681
-158	22.75	25.0576	9.03145	5.4238	14.929	0.643056
-158	22.75	24.7776	8.91942	5.26966	14.6437	0.628525
-31.24	-10.78	27.8934	10.3079	6.85558	17.8658	0.76343
-28.03	43.95	24.1103	8.6671	4.90231	13.9809	0.593068
-158	22.75	26.9676	9.87117	6.43028	16.9217	0.731401
-57.89	-51.93	7.30821	9.8795	2.9862	12.8729	0.332544
-158	22.75	24.9076	8.97101	5.34128	14.7757	0.635303
-158	22.75	25.8276	9.35596	5.84262	15.7279	0.681363
-158	22.75	24.1976	8.69887	4.95023	14.066	0.597756
-158	22.75	25.4076	9.17615	5.61544	15.29	0.66081
-158	22.75	24.8076	8.93125	5.2862	14.6741	0.630093
-30.88	63.33	10.3932	9.24592	2.4852	11.7527	0.283945
-21.78	26.22	27.2286	9.99321	6.556	17.1918	0.741341
-42.73	42.78	23.3993	8.42355	4.5163	13.3088	0.554662
-158	22.75	25.6276	9.26954	5.73491	15.5189	0.671689
-39.76	43	23.4002	8.42384	4.51677	13.3096	0.55471
-102.35	17.68	22.8584	8.25745	4.2303	12.8266	0.525488
-8.37	43.36	21.0796	7.84089	3.3695	11.463	0.433892
-158	22.75	22.8376	8.25141	4.21948	12.8086	0.524371
-36.76	43.25	23.394	8.42184	4.51345	13.3039	0.554374
-36.08	-30.08	22.8944	8.26795	4.24905	12.8578	0.527418
-158	22.75	24.0276	8.63738	4.857	13.9007	0.58862
-158	22.75	25.4276	9.18456	5.62633	15.3107	0.661808
-33.12	-14.9	27.8035	10.2652	6.81702	17.7762	0.760738
-158	22.75	24.7176	8.89586	5.23659	14.5831	0.625379
-43.42	-30.3	22.5634	8.17429	4.07821	12.5757	0.509726
-21.81	29.5	27.5406	10.1404	6.7006	17.5111	0.752321
-158	22.75	23.9176	8.5984	4.79687	13.7949	0.58269
-158	22.75	23.8076	8.56006	4.73691	13.6899	0.57675
-46.62	-33.39	19.4907	7.64991	2.74724	10.5876	0.36326
-19.76	44.61	24.5307	8.82358	5.13358	14.3955	0.615521
-46.38	42.46	23.5095	8.45948	4.57551	13.4103	0.560626
-158	22.75	24.8876	8.96302	5.33027	14.7554	0.634264
-158	22.75	23.7276	8.53258	4.69342	13.6142	0.572426
-158	22.75	26.0176	9.43931	5.94396	15.927	0.690339
-8.4	43.39	20.9596	7.82036	3.31708	11.3849	0.42811
-158	22.75	25.5476	9.23537	5.69158	15.4355	0.667761
-158	22.75	25.0276	9.01929	5.40731	14.8982	0.641511
-37.87	-24.35	25.5076	9.21837	5.66986	15.3939	0.665784
-37.87	-24.35	25.4976	9.21413	5.66442	15.3835	0.665289
-8.32	43.42	18.0392	7.62823	2.33028	10.1029	0.312167
-21.53	44.48	24.4564	8.79528	5.09263	14.3214	0.611577
-36.08	-30.08	17.6344	7.64745	2.24188	10.0225	0.300543
-21.81	29.5	27.5206	10.1309	6.69153	17.4908	0.751648
-37.87	-24.35	25.5076	9.21837	5.66986	15.3939	0.665784
-33.12	-14.9	27.7835	10.2556	6.80835	17.7562	0.760126
-35.77	-30.67	15.9465	7.83724	2.007	9.93752	0.265256
-29.73	43.83	24.0121	8.63186	4.84853	13.8858	0.587786
-14.05	43.92	22.7246	8.21907	4.16094	12.7117	0.518321
-158	22.75	22.6776	8.20584	4.13672	12.6718	0.51581
-158	22.75	27.4276	10.087	6.649	17.396	0.748464
-30	49.44	17.9779	7.63045	2.3161	10.0892	0.310331
-158	22.75	23.6976	8.52237	4.67715	13.5859	0.570803
-46.62	-33.39	18.9807	7.62585	2.58328	10.3823	0.343697
-49.81	-36.06	19.0673	7.62866	2.60982	10.4146	0.346902
-158	22.75	25.0776	9.03959	5.43478	14.9495	0.644083
-105	15.77	28.7587	10.7194	7.18939	18.6949	0.783879
-158	22.75	23.6976	8.52237	4.67715	13.5859	0.570803
-57.89	-51.93	7.19821	9.88991	2.99671	12.8935	0.333803
-43.42	-30.3	22.5534	8.17157	4.07311	12.5674	0.509194
-158	22.75	24.2276	8.70987	4.96671	14.0954	0.599364
-31.53	43.68	23.8118	8.5615	4.73918	13.6939	0.576977
-158	22.75	22.6976	8.21145	4.14701	12.6887	0.516878
-26.66	44.07	24.2651	8.72368	4.9873	14.1322	0.60137
-34.84	-31.37	14.5817	8.10346	1.96923	10.1409	0.252317
-158	22.75	24.2976	8.73573	5.00519	14.1642	0.60311
-57.89	-51.93	7.08821	9.89914	3.00637	12.9121	0.334994
-158	22.75	22.8076	8.24275	4.20389	12.7828	0.522763
-158	22.75	22.9376	8.28068	4.27164	12.8955	0.529741
-102.35	17.68	25.6484	9.27847	5.74616	15.5406	0.672706
-46.62	-33.39	19.1407	7.63146	2.63273	10.4427	0.349654
-35.77	-30.67	22.5065	8.15886	4.04921	12.5283	0.506701
-158	22.75	25.0176	9.01524	5.40181	14.888	0.640996
-21.81	29.5	27.5506	10.1451	6.70512	17.5213	0.752655
-158	22.75	24.3376	8.75061	5.0272	14.2036	0.605247
-158	22.75	24.7176	8.89586	5.23659	14.5831	0.625379
-158	22.75	23.8376	8.57045	4.75324	13.7185	0.578371
-53.3	-39.35	16.951	7.70368	2.12089	9.94033	0.283672
-158	22.75	23.4476	8.43921	4.5422	13.3531	0.557274
-38.15	43.15	23.4683	8.44595	4.5533	13.3722	0.558392
-158	22.75	26.5776	9.69119	6.23545	16.5145	0.715397
-102.35	17.68	25.0884	9.04399	5.44072	14.9606	0.644638
-158	22.75	23.6976	8.52237	4.67715	13.5859	0.570803
-158	22.75	24.3176	8.74316	5.01619	14.1839	0.604179
-158	22.75	22.0376	8.03963	3.81536	12.1517	0.482075
-158	22.75	23.3476	8.40693	4.4886	13.2615	0.551863
-35.05	-18.86	26.0751	9.46474	5.97439	15.9872	0.693009
-158	22.75	26.3876	9.60477	6.13792	16.3153	0.707149
-53.3	-39.35	16.961	7.70265	2.12241	9.94106	0.283893
-158	22.75	24.7876	8.92336	5.27517	14.6538	0.629048
-158	22.75	23.1676	8.35029	4.39277	13.0989	0.542135
-158	22.75	24.2576	8.72092	4.98319	14.1249	0.60097
-158	22.75	24.2276	8.70987	4.96671	14.0954	0.599364
-158	22.75	22.1076	8.05653	3.84969	12.2064	0.485716
-158	22.75	24.4776	8.80332	5.10429	14.3425	0.612702
-158	22.75	24.0976	8.66252	4.89535	13.9686	0.592386
-158	22.75	27.4276	10.087	6.649	17.396	0.748464
-20.01	38.17	24.7938	8.92578	5.27856	14.6601	0.629369
-158	22.75	23.9576	8.6125	4.81872	13.8333	0.584848
-57.89	-51.93	7.15821	9.8934	3.00033	12.9005	0.334244
-158	22.75	23.8976	8.59138	4.78595	13.7757	0.581611
-19.82	35.87	25.3034	9.13257	5.55857	15.1821	0.655579
-158	22.75	27.4276	10.087	6.649	17.396	0.748464
-158	22.75	29.7176	11.1651	7.46223	19.5147	0.792933
-36.2	-31.05	15.7907	7.86299	1.99604	9.94914	0.263083
-158	22.75	23.2676	8.38152	4.44591	13.1889	0.547537
-158	22.75	23.6076	8.49203	4.62842	13.5015	0.565933
-158	22.75	24.2376	8.71355	4.9722	14.1052	0.599899
-30	45.36	18.2035	7.62351	2.36967	10.1423	0.317221
-158	22.75	24.0376	8.64096	4.86248	13.9104	0.589158
-158	22.75	22.9276	8.27773	4.26641	12.8867	0.529204
-105	15.77	27.6387	10.1869	6.74466	17.6105	0.755555
-158	22.75	22.5576	8.17271	4.07524	12.5709	0.509416
-158	22.75	23.6976	8.52237	4.67715	13.5859	0.570803
-105	15.77	29.0587	10.8607	7.28698	18.9645	0.788394
-36.08	-30.08	17.5244	7.65451	2.22001	10.0048	0.297592
-8.32	43.42	18.6492	7.61982	2.48673	10.2692	0.331898
-158	22.75	25.0776	9.03959	5.43478	14.9495	0.644083
-158	22.75	23.5276	8.46544	4.58524	13.427	0.561604
-158	22.75	23.7276	8.53258	4.69342	13.6142	0.572426
-158	22.75	22.5376	8.16727	4.06504	12.5542	0.508353
-158	22.75	23.6276	8.49873	4.63923	13.5202	0.567016
-158	22.75	22.7976	8.23987	4.1987	12.7742	0.522227
-158	22.75	23.9276	8.60192	4.80233	13.8045	0.58323
-158	22.75	23.6676	8.51221	4.66089	13.5577	0.56918
-158	22.75	21.2076	7.86387	3.4263	11.5484	0.440126
-49.81	-36.06	19.0773	7.62902	2.61292	10.4183	0.347275
-158	22.75	22.5576	8.17271	4.07524	12.5709	0.509416
-158	22.75	22.8476	8.25431	4.22468	12.8173	0.524908
-158	22.75	23.6476	8.50546	4.65006	13.5389	0.568098
-158	22.75	21.8476	7.99535	3.72332	12.0062	0.472265
-158	22.75	23.9976	8.62669	4.84059	13.8718	0.587004
-158	22.75	20.2976	7.72497	3.04319	10.9886	0.397444
-53.3	-39.35	16.961	7.70265	2.12241	9.94106	0.283893
-158	22.75	24.9576	8.99105	5.3688	14.8267	0.637896
-158	22.75	29.7076	11.1606	7.46	19.5069	0.792924
-105	15.77	29.4787	11.0559	7.4053	19.3225	0.792188
-36.08	-30.08	22.8944	8.26795	4.24905	12.8578	0.527418
-49.81	-36.06	19.1573	7.63214	2.63797	10.4492	0.350283
-158	22.75	24.0276	8.63738	4.857	13.9007	0.58862
-55.88	-48	5.48888	9.87931	3.02429	12.907	0.34228
-158	22.75	22.9776	8.29256	4.29259	12.9305	0.531893
-158	22.75	29.7076	11.1606	7.46	19.5069	0.792924
-8.87	42.18	17.6365	7.64732	2.24231	10.0229	0.300601
-43.42	-30.3	22.5634	8.17429	4.07821	12.5757	0.509726
-158	22.75	21.0376	7.83359	3.35105	11.4354	0.43186
-55.88	-48	5.47888	9.87814	3.02354	12.905	0.342252
-158	22.75	22.6376	8.1947	4.11616	12.638	0.513676
-30.66	-21.06	23.9252	8.60106	4.80099	13.8021	0.583098
-8.32	43.42	18.4692	7.61969	2.43769	10.2145	0.325804
-102.35	17.68	24.5084	8.81505	5.12127	14.3732	0.614337
-158	22.75	23.3476	8.40693	4.4886	13.2615	0.551863
-8.32	43.42	18.3392	7.62097	2.40376	10.1779	0.321543
-19.82	35.87	25.4034	9.1744	5.61316	15.2857	0.660601
-102.35	17.68	23.5984	8.48896	4.62345	13.4929	0.565436
-19.82	35.87	25.4034	9.1744	5.61316	15.2857	0.660601
-154	-20.09	17.7659	7.64003	2.26925	10.046	0.304189
-55.88	-48	5.13888	9.8299	2.99022	12.823	0.340639
-8.77	42.36	16.9243	7.70647	2.11688	9.93846	0.283083
-8.79	42.23	19.2243	7.63509	2.65929	10.4757	0.352833

## Sheet: projections_SSP5-8.5
longitude	latitude	temperature	heterotrophic bacteria (µgC L-1)	autotrophic picoplankton (µgC L-1)	total picoplankton (µgC L-1)	ratio (AP:HB)
-30.68	9.56	30.8457	11.6533	7.61303	20.285	0.780743
-47.3	-27.2	23.3126	8.39577	4.46991	13.2297	0.549971
-30.06	8.53	31.0124	11.7204	7.61676	20.3764	0.776512
-20.02	41.49	19.9047	7.68275	2.89368	10.7819	0.38033
-30.06	8.53	31.0224	11.7243	7.61682	20.3817	0.776237
-16.28	44.9	23.5402	8.4696	4.59203	13.4387	0.562285
-100.56	-0.35	20.3793	7.73509	3.07552	11.0342	0.401107
12	-18.99	13.787	8.29493	2.00405	10.3551	0.250875
-9.02	47.55	22.7655	8.23067	4.18205	12.7466	0.520505
-30.68	9.56	29.0457	10.8546	7.28298	18.9531	0.788229
-32.29	12.24	29.6418	11.1306	7.44502	19.4547	0.792813
17.88	-32.24	11.416	8.95595	2.30104	11.2865	0.268819
-45.46	-25.42	17.7052	7.64331	2.25646	10.0349	0.302492
-32.29	12.24	29.5218	11.0757	7.41615	19.3579	0.792401
-63.73	40.68	22.3775	8.12467	3.98399	12.4223	0.499875
-179.73	-34.37	22.9808	8.29352	4.29428	12.9333	0.532067
-136.63	-13.15	21.157	7.85465	3.40373	11.5144	0.437652
-140.58	-9.11	27.3242	10.0382	6.60099	17.2901	0.744813
179.45	-50.48	10.9779	9.08185	2.37775	11.4855	0.27493
-21.47	21.76	25.8607	9.37039	5.86033	15.7625	0.68294
-14.01	44.68	19.9028	7.68257	2.89295	10.7809	0.380247
-8.77	42.36	18.0887	7.62662	2.34193	10.1144	0.313669
66.49	18.57	30.5577	11.5339	7.59463	20.1124	0.786501
-29	5.98	31.4128	11.8748	7.60376	20.5685	0.763514
-30	55.25	18.6395	7.61976	2.48402	10.2661	0.331563
-17.43	41.08	21.5022	7.92098	3.56042	11.7528	0.454733
-44.7	-27.4	22.3458	8.11641	3.96803	12.3965	0.4982
-44.7	-27.4	21.9458	8.01793	3.77066	12.0808	0.477319
-131.32	-11.28	21.3407	7.88894	3.48632	11.6394	0.446683
-45.4	-26.3	24.006	8.62967	4.84518	13.8799	0.587456
-20	16.38	22.067	8.04668	3.82975	12.1746	0.483602
-21.01	13.8	26.5398	9.6739	6.21614	16.4749	0.713776
-98.93	0.23	20.4712	7.74705	3.11243	11.0868	0.405274
-85.28	5.12	18.932	7.62449	2.56859	10.3647	0.341917
-25	-2.24	28.9439	10.8068	7.25085	18.8626	0.786836
110	-12.5	30.2751	11.4129	7.56263	19.9262	0.790324
-36.46	19.05	27.2525	10.0044	6.56729	17.2164	0.742217
-113.53	-4.98	21.4537	7.91118	3.53802	11.7184	0.452305
-121.81	-7.93	21.7785	7.97983	3.69024	11.9543	0.468722
-30	55.25	18.6395	7.61976	2.48402	10.2661	0.331563
-30	55.25	18.6395	7.61976	2.48402	10.2661	0.331563
110	-12.5	30.2751	11.4129	7.56263	19.9262	0.790324
-14.01	44.68	18.4628	7.61973	2.43597	10.2126	0.32559
-85	5.22	20.305	7.72586	3.0461	10.9927	0.397773
-79.68	8.13	18.5822	7.61952	2.46819	10.2483	0.329602
-83.83	5.64	20.619	7.7675	3.17285	11.1736	0.412063
-13.14	-2.12	23.5086	8.45916	4.57498	13.4094	0.560573
-20	16.38	22.067	8.04668	3.82975	12.1746	0.483602
-12.27	46.18	22.9708	8.29055	4.28904	12.9245	0.531529
177.53	-52.12	9.96928	9.3601	2.56477	11.9437	0.290914
-64.51	40.98	22.4699	8.14907	4.03066	12.4981	0.504763
-25	-10.6	28.8903	10.7816	7.23348	18.8145	0.786037
73.89	6.03	32.1496	12.13	7.49149	20.8095	0.728302
-80.51	31.95	23.3836	8.41848	4.50786	13.2944	0.55381
170	-28.41	22.0387	8.03988	3.81589	12.1525	0.482131
-25	-10.6	28.9003	10.7863	7.23675	18.8235	0.786189
-14.06	46.49	14.7697	8.06172	1.96684	10.0999	0.253295
-45.5	-28.4	22.7036	8.21314	4.15011	12.6938	0.517199
-13.2	-1.37	24.8517	8.94871	5.31047	14.7188	0.632392
-58.12	40.8	23.4954	8.45484	4.5679	13.3972	0.559861
-28.21	-3.92	27.4685	10.1063	6.66776	17.4377	0.749874
-47.8	-30.7	23.3247	8.39961	4.47635	13.2406	0.550623
-83.95	5.6	20.4402	7.74294	3.0999	11.0689	0.403862
-25	-2.24	27.3239	10.038	6.60086	17.2898	0.744803
-14.06	46.49	14.7097	8.07489	1.96735	10.1125	0.252956
-28.21	-3.92	25.1785	9.08085	5.49013	15.0531	0.649242
159.9	-18	30.4895	11.505	7.58814	20.0689	0.787586
168.57	-26.14	21.731	7.96937	3.66769	11.9191	0.466302
-20.42	35.67	19.9015	7.68245	2.89247	10.7802	0.380191
-176.48	-10.33	31.6653	11.9668	7.57872	20.6684	0.753156
-25	-10.6	28.9003	10.7863	7.23675	18.8235	0.786189
179.58	57	7.80794	9.81851	2.92861	12.7559	0.326084
-107.22	-2.73	20.6638	7.77398	3.1914	11.2005	0.414139
-21.56	22.17	26.2743	9.5537	6.07906	16.1964	0.702103
66.53	18.57	30.5677	11.5381	7.59551	20.1187	0.786334
-93.28	2.25	20.79	7.79303	3.24437	11.2777	0.420047
-100.27	-0.23	20.4423	7.74323	3.10076	11.0701	0.403959
-95.4	1.44	20.819	7.79756	3.25668	11.2958	0.421416
-25	-10.6	28.9003	10.7863	7.23675	18.8235	0.786189
164.59	-19.22	32.0196	12.0881	7.52015	20.7784	0.735635
-130	-10.81	21.5581	7.93248	3.58638	11.7928	0.457542
-32.57	24.33	26.7241	9.75839	6.3095	16.6678	0.721559
-86.25	4.77	19.8483	7.67758	2.87304	10.754	0.377944
-6.17	-2.81	18.2386	7.62273	2.37835	10.1513	0.318326
110	-11.5	30.2289	11.3928	7.55614	19.8942	0.790784
-21.01	13.8	25.0398	9.02421	5.41398	14.9107	0.642137
-84.52	2.08	27.6488	10.1917	6.74914	17.6207	0.755881
12	-18.99	23.027	8.30737	4.31855	12.9739	0.534554
167.9	-25.05	21.3803	7.89664	3.50437	11.6669	0.448648
-30	55.25	18.6495	7.61982	2.48681	10.2693	0.331907
71.64	0	32.114	12.1187	7.49972	20.8015	0.730358
-30	50.84	19.6915	7.66434	2.81678	10.6788	0.371408
-132.46	-11.68	21.3907	7.89868	3.50913	11.6742	0.449166
-99.2	0.13	20.7112	7.78102	3.21121	11.2293	0.416352
159.9	-18	31.4895	11.9033	7.59757	20.6007	0.760547
-33.61	14.43	27.8606	10.2923	6.84161	17.8332	0.76246
-23.63	6.08	30.633	11.5655	7.60086	20.1592	0.785182
0.6	-8.62	23.0589	8.317	4.33532	13.0021	0.536271
-158	22.75	30.3305	11.4369	7.56995	19.9639	0.789713
-74.46	37.66	22.5178	8.16191	4.05495	12.5377	0.5073
-45.5	-28.4	22.9036	8.27067	4.25387	12.8658	0.527915
-47.6	-30.8	21.4247	7.90538	3.52468	11.698	0.450856
-30	50.84	19.6015	7.65753	2.78526	10.6372	0.367725
159.9	-18	30.6195	11.5598	7.59982	20.1509	0.785428
179.55	50	9.37522	9.51014	2.67535	12.2009	0.300982
-76.03	34.3	22.0632	8.04576	3.82788	12.1716	0.483404
-93	2.36	21.4	7.90049	3.51335	11.6806	0.449625
-46.62	-33.39	21.1995	7.86238	3.42266	11.5429	0.439729
-28.95	43.88	25.0394	9.02406	5.41378	14.9103	0.642118
110	-11.5	30.2889	11.4189	7.5645	19.9356	0.790178
-47.1	-27.7	23.7642	8.54511	4.7133	13.6488	0.574405
-90.71	3.17	20.4491	7.74411	3.10348	11.074	0.404266
-21.01	13.8	28.4798	10.5871	7.08976	18.4352	0.778433
-30	61.91	16.5829	7.74586	2.07038	9.92334	0.276036
110	-11.5	30.2289	11.3928	7.55614	19.8942	0.790784
-46.6	-27.9	23.1772	8.35327	4.39788	13.1075	0.542655
-179	58.9	8.87529	9.62447	2.76452	12.4019	0.309441
12	-18.99	12.577	8.62205	2.12519	10.7881	0.256352
-79.94	31.1	23.1015	8.32996	4.3578	13.0399	0.538568
-142.56	-8.91	27.5223	10.1317	6.69231	17.4925	0.751706
14.32	-24.75	19.3136	7.63951	2.68822	10.5121	0.356279
-170.72	-18.17	28.7791	10.729	7.19635	18.7135	0.784231
-158	22.75	28.8905	10.7816	7.23353	18.8146	0.786039
-62.85	41.1	22.6376	8.19469	4.11615	12.6379	0.513674
-30	59.35	16.6964	7.732	2.08486	9.92658	0.278282
-51.58	42.05	23.7044	8.52469	4.68084	13.5923	0.571172
-19.87	29.18	25.1411	9.06552	5.46964	15.0147	0.647335
-6.17	-2.81	16.5586	7.74893	2.0674	9.92288	0.275568
14.32	-24.75	16.7436	7.72645	2.09117	9.92844	0.279244
-19.17	44.46	23.3081	8.39432	4.46748	13.2255	0.549724
-25	-2.24	28.5439	10.6176	7.11339	18.4956	0.779787
0.61	-8.63	17.7489	7.64093	2.26563	10.0429	0.30371
-131.17	-11.22	21.2907	7.87938	3.46366	11.6049	0.444211
-13.2	-1.37	24.3917	8.77085	5.05695	14.2571	0.60813
-47.3	-27.2	23.7126	8.52748	4.68529	13.6	0.571615
69.98	14.6	31.6073	11.9461	7.58567	20.647	0.755687
-138.07	-13.65	20.9002	7.81057	3.29144	11.347	0.425273
-13.2	-1.37	24.7817	8.92101	5.2719	14.6478	0.628737
164.59	-19.22	32.1896	12.1427	7.48186	20.818	0.72594
4.69	-31.03	18.0963	7.62638	2.34374	10.1162	0.313901
-22.94	7.58	30.3553	11.4476	7.57306	19.9806	0.789418
-110.45	-3.88	21.1379	7.85122	3.39526	11.5016	0.436724
-95.07	1.61	20.776	7.79086	3.23845	11.269	0.419388
-6.17	-2.81	24.0486	8.64489	4.86849	13.921	0.589749
-84.59	-2.01	22.8863	8.26559	4.24483	12.8508	0.526985
-12.85	-2.14	23.2781	8.38482	4.45148	13.1983	0.548103
-158	22.75	29.6505	11.1346	7.44704	19.4617	0.792832
-13.14	-2.12	20.6586	7.77322	3.18923	11.1973	0.413897
-30	59.35	16.6964	7.732	2.08486	9.92658	0.278282
16.45	-29.52	18.0174	7.62899	2.32519	10.098	0.311509
-30	53.56	18.3293	7.62111	2.40121	10.1752	0.321222
-90.35	3.31	20.9688	7.8219	3.32107	11.3908	0.428551
-73.23	40.48	22.2132	8.08262	3.90185	12.2899	0.491232
-15.45	29.18	23.6213	8.49663	4.63584	13.5143	0.566677
-14.06	46.49	14.7997	8.0552	1.96668	10.0937	0.253475
-158	22.75	29.0105	10.8381	7.272	18.9219	0.787766
-20	16.38	18.627	7.61969	2.48054	10.2622	0.331133
0.61	-8.63	22.6889	8.20901	4.14253	12.6813	0.516413
-53.3	-39.35	20.544	7.75692	3.142	11.1291	0.408602
0.6	-8.62	18.8489	7.62255	2.54393	10.3354	0.338917
-32.57	24.33	26.6841	9.73999	6.28938	16.626	0.719894
38.24	21.98	32.2868	12.1728	7.4569	20.8366	0.720011
-33.61	14.43	28.2506	10.4781	7.00203	18.2161	0.773119
110	-20	28.2396	10.4728	6.99767	18.2054	0.772844
-132.65	-11.75	21.3607	7.89282	3.49544	11.6533	0.447676
-32.57	24.33	26.8541	9.81844	6.37436	16.8035	0.726878
-47.1	-30.6	22.2247	8.08551	3.90757	12.299	0.491835
-54.4	-43.48	14.5085	8.12013	1.97079	10.1579	0.252004
-77.35	33.45	22.0724	8.04799	3.83241	12.1788	0.483884
-12.72	-1.36	23.1605	8.34807	4.38898	13.0925	0.541749
-36.04	42.23	24.643	8.8668	5.19545	14.5079	0.621453
-158	22.75	29.1905	10.9224	7.3265	19.0794	0.789913
-123.07	-8.38	21.6078	7.94287	3.60959	11.8287	0.460047
-45.5	-26.2	24.2243	8.70866	4.96489	14.0922	0.599186
-29.76	-7.48	30.3097	11.4279	7.56725	19.9498	0.789951
-33.61	14.43	28.2506	10.4781	7.00203	18.2161	0.773119
-14.06	46.49	14.7797	8.05954	1.96678	10.0978	0.253354
-45.7	-25.9	23.3418	8.40509	4.48553	13.2563	0.551552
47.46	-11.64	28.9517	10.8104	7.25336	18.8695	0.786949
110	-18.5	28.5616	10.626	7.11983	18.5122	0.78015
-30	59.35	16.7064	7.73081	2.08619	9.92695	0.278484
-30	53.56	18.3593	7.6207	2.40891	10.1834	0.322193
-102.35	17.68	20.9523	7.81914	3.31388	11.3802	0.427757
110	-21.5	26.8109	9.79845	6.35291	16.7585	0.725127
-55.94	-47.62	11.4932	8.93366	2.28801	11.2518	0.267812
-29.02	17.87	28.5455	10.6183	7.11398	18.4971	0.77982
-74.91	35.08	22.4203	8.1359	4.00557	12.4573	0.502137
-127.03	-9.78	21.1184	7.84774	3.38662	11.4887	0.435775
-45.51	40.99	24.1618	8.6858	4.93057	14.0311	0.595835
-2.63	-5.86	19.0231	7.62716	2.59619	10.3979	0.345258
164.59	-19.22	31.7596	12.0001	7.56585	20.7012	0.748837
-170.74	-18.18	28.6791	10.6817	7.1618	18.6216	0.782444
159.9	-18	31.1095	11.7587	7.61651	20.4266	0.773733
-69.88	40.55	23.2483	8.37544	4.43562	13.1714	0.546493
-45.85	-24.67	15.1241	7.98716	1.96877	10.0334	0.255827
-8.36	43.37	20.6406	7.7706	3.18176	11.1865	0.41306
-32.57	24.33	26.8441	9.81381	6.3694	16.7931	0.726474
-8.77	42.36	18.2887	7.62177	2.39091	10.1643	0.319919
-134.02	-12.23	21.3573	7.89215	3.49385	11.6509	0.447503
-158	22.75	29.5605	11.0935	7.42568	19.3893	0.792563
-170.74	-18.18	27.3091	10.0311	6.59394	17.2747	0.744272
-158	22.75	29.6405	11.1301	7.44472	19.4537	0.79281
110	-14	30.3264	11.4351	7.56943	19.9611	0.78976
177.33	28	26.0058	9.43409	5.93769	15.9146	0.689787
-22.87	32.68	22.6423	8.196	4.11858	12.6419	0.513926
-20	16.38	21.217	7.8656	3.4305	11.5547	0.440587
-106.8	-2.58	20.5287	7.75482	3.13576	11.1202	0.4079
-22.87	32.68	23.6723	8.5138	4.66343	13.5621	0.569435
-15.35	2.16	27.1008	9.9333	6.49494	17.0598	0.736555
-29.01	-5.14	29.9577	11.2732	7.51126	19.6986	0.792581
-158	22.75	28.9005	10.7863	7.2368	18.8236	0.786192
-158	22.75	30.1205	11.3453	7.53958	19.8176	0.791685
-45.7	-25.9	23.7418	8.53745	4.70116	13.6276	0.573196
-25	-21.63	27.573	10.1558	6.71525	17.5441	0.753402
-158	22.75	29.6605	11.1392	7.44934	19.4696	0.792852
176.38	-20.71	30.8848	11.6691	7.61437	20.307	0.779812
-158	22.75	30.8905	11.6714	7.61454	20.3102	0.779672
-21.01	13.8	28.5498	10.6204	7.11553	18.5011	0.779908
-2.63	-5.86	18.1931	7.62375	2.36712	10.1397	0.316895
-158	22.75	28.8805	10.7769	7.23025	18.8056	0.785885
-45.46	-25.42	20.0452	7.69661	2.94599	10.8533	0.386351
-158	22.75	26.9305	9.85391	6.41209	16.8831	0.729936
110	-38	14.3583	8.15495	1.97505	10.1946	0.251477
-22.8	43.99	23.6405	8.50305	4.64619	13.5322	0.567711
-20	39.9	17.4133	7.66242	2.19887	9.98865	0.294705
110	-14	30.3264	11.4351	7.56943	19.9611	0.78976
-20.02	41.49	16.8947	7.70961	2.1125	9.93651	0.282438
-14.05	43.92	19.1075	7.63015	2.62231	10.4299	0.348404
-46.9	-31.1	20.5722	7.76085	3.15355	11.1458	0.409899
110	-38	14.3983	8.14559	1.97378	10.1846	0.251602
-36.46	19.05	27.7725	10.2504	6.80355	17.7451	0.759786
-158	22.75	29.2705	10.9596	7.34945	19.1481	0.79069
-2.63	-5.86	15.4231	7.92876	1.97711	9.98882	0.258674
14.32	-24.75	17.3136	7.67019	2.18067	9.97565	0.29219
-158	22.75	27.5105	10.1262	6.68695	17.4805	0.751307
110	-14	30.3164	11.4308	7.56814	19.9544	0.789875
110	-21.5	27.2309	9.99429	6.55708	17.1942	0.741425
-12.85	-2.14	17.8381	7.63644	2.28481	10.06	0.306242
-158	22.75	27.1305	9.94722	6.50923	17.0906	0.737683
-8.1	48.75	13.5035	8.36835	2.02557	10.4461	0.251368
-175.67	-19.99	29.4133	11.0258	7.38836	19.2684	0.791801
-87.43	4.35	20.03	7.69504	2.94024	10.8454	0.385691
-30	59.35	16.6964	7.732	2.08486	9.92658	0.278282
-17.43	41.08	16.1622	7.80373	2.02512	9.92665	0.268568
-82.75	6.02	19.9902	7.69102	2.92533	10.825	0.383978
-104	-1.58	20.1884	7.71215	3.00061	10.9289	0.3926
-139.71	-14.15	20.9009	7.81067	3.29171	11.3474	0.425303
110	-20	28.1596	10.4347	6.96578	18.1278	0.770807
-158	22.75	29.4405	11.0383	7.39548	19.291	0.791971
-158	22.75	30.0205	11.3011	7.52266	19.7451	0.792299
-127.69	35.42	17.0809	7.69076	2.14116	9.95084	0.286609
110	-14	30.3164	11.4308	7.56814	19.9544	0.789875
-21.22	17.79	27.1067	9.93605	6.49777	17.0659	0.736779
-35.52	-19.91	26.093	9.47269	5.98386	16.006	0.693838
-8.44	43.42	16.2578	7.7897	2.03425	9.92381	0.270147
110	-38	14.2683	8.17623	1.9783	10.2177	0.251237
-30	53.56	18.3493	7.62083	2.40634	10.1806	0.321869
-123.02	-8.35	21.6778	7.9578	3.64249	11.8798	0.463593
-27.2	44.02	24.6847	8.88302	5.21845	14.5499	0.62365
-46.01	-24.36	19.7864	7.67215	2.85065	10.7239	0.375348
176.38	-20.71	30.5248	11.52	7.5916	20.0915	0.787038
174.27	-20.75	31.6812	11.9725	7.57669	20.6741	0.752445
-77.41	13.93	23.1205	8.33578	4.36784	13.0568	0.539593
-128.33	-10.23	21.3962	7.89976	3.51164	11.678	0.449439
-94.43	1.83	22.026	8.03684	3.80968	12.1427	0.481471
170.72	-29.54	22.2939	8.10307	3.94208	12.3546	0.495472
-21.01	13.8	27.8698	10.2967	6.84551	17.8423	0.762732
-28.95	43.17	24.6012	8.85062	5.17239	14.4659	0.619246
-158	22.75	29.2205	10.9363	7.3352	19.1053	0.790217
-158	22.75	30.1805	11.3717	7.54897	19.8603	0.791217
179.55	50	9.14522	9.56428	2.71701	12.2955	0.304894
-158	22.75	26.9405	9.85856	6.417	16.8935	0.730333
-158	22.75	29.0905	10.8756	7.29671	18.9924	0.788787
-158	22.75	28.1505	10.4304	6.96213	18.119	0.770571
-46.2	-28.1	23.2772	8.38456	4.45104	13.1976	0.548058
-141.96	-15.15	20.6369	7.77007	3.18025	11.1843	0.412891
0.6	-8.62	18.9489	7.62494	2.57367	10.3708	0.342533
-30	53.56	18.3293	7.62111	2.40121	10.1752	0.321222
-158	22.75	31.2805	11.8249	7.61159	20.5095	0.768262
-112.23	-4.51	21.3221	7.88537	3.47787	11.6265	0.445762
34.83	27.16	29.8999	11.2473	7.50022	19.6552	0.79277
-34.9	22.23	27.2952	10.0246	6.58744	17.2604	0.743772
-140.71	-14.63	20.7006	7.77943	3.20677	11.2228	0.415856
-43.29	-30.14	20.1701	7.71008	2.99355	10.9191	0.391794
-109.55	-3.56	21.0102	7.82889	3.33907	11.4176	0.430539
110	-15.5	29.3961	11.0178	7.38381	19.254	0.791686
-36.46	19.05	27.8025	10.2647	6.81657	17.7751	0.760707
47.49	-11.8	29.111	10.8852	7.30291	19.0104	0.789031
-172.81	-19.5	29.8808	11.2388	7.49647	19.6408	0.792817
-114.23	-5.58	21.5249	7.92562	3.57093	11.769	0.455871
110	-39.5	13.2245	8.44275	2.05103	10.5424	0.252343
47.42	-11.74	28.7517	10.7161	7.18699	18.6884	0.783756
-158	22.75	30.1905	11.376	7.55048	19.8673	0.791131
-158	22.75	29.5805	11.1026	7.43052	19.4055	0.792636
-158	22.75	29.7905	11.1981	7.478	19.5716	0.792945
-175.67	-19.99	28.7033	10.6932	7.17025	18.6439	0.78289
-10.8	46.78	23.0024	8.29998	4.30561	12.9523	0.533228
-25	-2.24	27.3039	10.0286	6.5915	17.2693	0.744084
-8.44	43.42	17.2578	7.67482	2.17082	9.969	0.290815
-33.93	43.48	25.3293	9.14335	5.57271	15.2089	0.656883
-158	22.75	28.2105	10.459	6.98616	18.1773	0.772114
110	-20	28.1096	10.4109	6.94555	18.079	0.769491
-158	22.75	28.1505	10.4304	6.96213	18.119	0.770571
-13.98	48.06	15.9861	7.8309	2.01007	9.93507	0.265838
-47.1	-27.7	23.6642	8.51106	4.65904	13.5545	0.568996
-158	22.75	30.2105	11.3848	7.55346	19.8813	0.790954
-35.83	18.04	27.4725	10.1082	6.66962	17.4419	0.750013
-47.1	-27.8	23.7176	8.52918	4.68801	13.6048	0.571886
-32.38	43.6	25.2684	9.11799	5.53938	15.1458	0.653807
-91.32	2.96	20.5991	7.76464	3.16461	11.1617	0.411139
172.12	-21.37	31.7212	11.9866	7.57134	20.6881	0.750628
-35.8	21.41	27.2602	10.0081	6.57093	17.2243	0.742498
-25.63	1.9	16.1251	7.80932	2.02176	9.92809	0.267972
-75.99	34.33	22.2532	8.0927	3.92174	12.3218	0.49333
-21.93	10.06	30.3342	11.4385	7.57042	19.9664	0.789669
-158	22.75	29.5105	11.0706	7.41333	19.3486	0.792349
-158	22.75	29.5805	11.1026	7.43052	19.4055	0.792636
-34.23	42.46	24.6597	8.87329	5.20468	14.5248	0.622335
-49.59	-35.71	17.5142	7.6552	2.21804	10.0032	0.297325
-65.43	40.64	22.8301	8.24924	4.21557	12.8021	0.523969
37.22	23.36	30.9552	11.6975	7.61606	20.3458	0.77804
-26.27	24.78	28.5184	10.6055	7.10406	18.4716	0.779257
-91.58	2.87	21.1129	7.84676	3.38419	11.485	0.435507
110	-39.5	13.2245	8.44275	2.05103	10.5424	0.252343
110	-17	29.0948	10.8776	7.29801	18.9962	0.788839
-135.48	-12.75	21.2439	7.87058	3.44256	11.573	0.441906
110	-17	29.1148	10.887	7.30405	19.0137	0.789076
-21.93	10.06	30.0542	11.3161	7.52854	19.7698	0.792115
178.64	-20.97	30.5309	11.5226	7.59218	20.0954	0.78694
-102.94	6.33	29.0147	10.8401	7.27332	18.9256	0.787822
110	-21.5	27.3109	10.0319	6.59477	17.2765	0.744335
-158	22.75	26.5605	9.68338	6.22674	16.4966	0.714667
-158	22.75	28.4905	10.5922	7.09375	18.4453	0.778664
-30	53.56	17.1493	7.68436	2.15234	9.95734	0.288207
172.12	-21.37	31.7212	11.9866	7.57134	20.6881	0.750628
-34.83	-31.16	16.581	7.7461	2.07015	9.9233	0.276
-10.56	46.9	22.7524	8.22695	4.1753	12.7354	0.519808
-158	22.75	28.2105	10.459	6.98616	18.1773	0.772114
-158	22.75	29.2705	10.9596	7.34945	19.1481	0.79069
-158	22.75	26.3405	9.5835	6.11352	16.2659	0.705063
-158	22.75	29.7105	11.1619	7.46065	19.5092	0.792927
-170.83	-18.25	28.0491	10.3821	6.9208	18.0197	0.767856
-158	22.75	29.5105	11.0706	7.41333	19.3486	0.792349
-54.4	-43.48	14.5385	8.11328	1.97011	10.1509	0.252128
-90.22	3.35	20.6088	7.76604	3.16863	11.1675	0.41159
110	-17	29.1248	10.8917	7.30706	19.0224	0.789192
-92.05	2.7	20.5302	7.75502	3.13636	11.121	0.407968
162.12	-18.62	30.5938	11.549	7.59774	20.135	0.785885
-158	22.75	28.1905	10.4494	6.97819	18.1579	0.771605
-25.63	1.9	17.0751	7.69131	2.14022	9.95032	0.286475
-158	22.75	29.5105	11.0706	7.41333	19.3486	0.792349
-108.23	-3.08	20.8159	7.79708	3.25538	11.2939	0.421271
-30	49.44	21.229	7.86781	3.43586	11.5628	0.441173
-158	22.75	30.4705	11.4969	7.58619	20.0566	0.787869
178.64	-20.97	30.5409	11.5268	7.59311	20.1018	0.786778
53.99	-16.96	29.3234	10.9842	7.36418	19.193	0.791144
-158	22.75	29.5105	11.0706	7.41333	19.3486	0.792349
-30	50.84	19.7715	7.67088	2.84526	10.7167	0.374723
172.12	-21.37	31.9112	12.052	7.54108	20.7486	0.741379
-158	22.75	30.1405	11.3541	7.54277	19.8319	0.791537
-46.66	42.45	24.2044	8.70136	4.95396	14.0727	0.59812
-35.8	21.41	27.2602	10.0081	6.57093	17.2243	0.742498
-15.35	2.16	27.1408	9.95202	6.51415	17.1012	0.73807
-21.93	10.06	30.9842	11.7091	7.61649	20.3614	0.777275
-158	22.75	26.9105	9.84462	6.40225	16.8623	0.729141
-71.7	40.51	22.9465	8.28333	4.27631	12.9033	0.530222
-136.73	-13.07	21.2377	7.86943	3.43977	11.5687	0.441601
14.32	-24.75	17.8836	7.63435	2.29484	10.0692	0.307558
-126.8	-9.7	21.2384	7.86957	3.44011	11.5693	0.441638
-54.73	-43.43	10.1798	9.30401	2.52519	11.8493	0.287418
110	-15.5	29.4161	11.027	7.38909	19.2707	0.791819
-158	22.75	30.1205	11.3453	7.53958	19.8176	0.791685
-153.68	0	24.8825	8.96097	5.32743	14.7501	0.633996
47.42	-11.74	28.5517	10.6213	7.11623	18.5029	0.779948
-158	22.75	30.6405	11.5686	7.60143	20.1639	0.785043
178.64	-20.97	30.2509	11.4024	7.55928	19.9095	0.790571
4.14	-11.62	22.3416	8.11534	3.96595	12.3931	0.497982
-158	22.75	29.8405	11.2207	7.48838	19.6101	0.792894
-158	22.75	30.6405	11.5686	7.60143	20.1639	0.785043
43.29	-15.34	28.5492	10.6201	7.11533	18.5006	0.779897
-21	21.95	26.0807	9.46723	5.97736	15.9931	0.69327
-158	22.75	28.9805	10.824	7.26254	18.8953	0.787356
-21.71	33.62	21.4777	7.91601	3.54909	11.7354	0.453505
-21.93	10.06	30.6342	11.566	7.60096	20.16	0.785159
-178.51	-20.45	30.8989	11.6749	7.61478	20.3149	0.779466
-158	22.75	29.9205	11.2566	7.50421	19.6708	0.79271
-25	-21.63	27.573	10.1558	6.71525	17.5441	0.753402
-13.85	45.48	23.0552	8.31588	4.33339	12.9988	0.536073
-25.72	30.29	23.2714	8.38271	4.44791	13.1923	0.54774
-32.57	24.33	26.8341	9.80918	6.36444	16.7826	0.726069
-158	22.75	29.5305	11.0797	7.41831	19.3649	0.79244
-46.9	-28	23.9176	8.59841	4.79688	13.7949	0.582692
4.69	-31.03	18.1363	7.62522	2.35332	10.1257	0.315131
-35.83	18.04	27.7725	10.2504	6.80358	17.7452	0.759788
-134.05	-12.23	21.3373	7.88828	3.48476	11.637	0.446512
-158	22.75	29.7105	11.1619	7.46065	19.5092	0.792927
162.12	-18.62	31.1138	11.7604	7.61645	20.4288	0.773605
-24.61	43.75	23.7529	8.54125	4.70719	13.6381	0.573796
-29	-16.61	29.5003	11.0659	7.41077	19.3402	0.792299
-54.4	-43.48	14.5585	8.10873	1.96969	10.1462	0.252214
-178.51	-20.45	31.0189	11.723	7.6168	20.3798	0.776333
110	-15.5	29.3861	11.0132	7.38114	19.2457	0.791617
-158	22.75	26.0105	9.43618	5.9402	15.9195	0.690008
-132.38	-11.66	21.2907	7.87939	3.46368	11.605	0.444213
-172.81	-19.5	30.6708	11.5813	7.60362	20.1823	0.78447
-98.03	0.55	21.1488	7.85318	3.4001	11.5089	0.437255
-175.67	-19.99	30.2933	11.4208	7.56508	19.9386	0.790131
-34.9	22.23	27.4352	10.0906	6.65252	17.4038	0.748729
-158	22.75	29.1205	10.8897	7.30578	19.0187	0.789142
110	-15.5	29.3861	11.0132	7.38114	19.2457	0.791617
-178.51	-20.45	31.0389	11.7309	7.61687	20.3903	0.775776
-8.89	42.17	17.7115	7.64296	2.25776	10.036	0.302665
-54.91	40.82	24.0002	8.62761	4.842	13.8743	0.587143
-109.2	-3.39	20.9064	7.81158	3.29411	11.3509	0.425569
47.51	-11.81	28.911	10.7913	7.24022	18.8331	0.786351
110	-27.5	22.887	8.2658	4.2452	12.8514	0.527023
162.12	-18.62	31.0838	11.7486	7.61675	20.4135	0.774492
-55.94	-47.62	11.0832	9.05175	2.35895	11.4374	0.273404
162.12	-18.62	31.0938	11.7526	7.61667	20.4186	0.774199
-158	22.75	28.9305	10.8005	7.24654	18.8506	0.786641
-158	22.75	27.2505	10.0035	6.56637	17.2144	0.742145
-158	22.75	27.4405	10.0931	6.65494	17.4092	0.748911
-158	22.75	26.1205	9.48493	5.99839	16.0349	0.695108
-13.98	48.06	16.0161	7.82615	2.01247	9.93335	0.266286
-21.26	30.91	21.7858	7.98145	3.69372	11.9598	0.469095
-158	22.75	28.0405	10.378	6.91725	18.0113	0.767619
-158	22.75	29.2005	10.927	7.32941	19.0881	0.790016
-158	22.75	27.2505	10.0035	6.56637	17.2144	0.742145
-26.47	-0.13	29.4217	11.0297	7.39059	19.2754	0.791855
-117.83	-6.51	21.5081	7.92218	3.56315	11.757	0.455028
-158	22.75	28.5405	10.616	7.11215	18.4924	0.779717
-24.41	29.18	25.6165	9.2648	5.72893	15.5073	0.671148
-111.02	-4.08	21.276	7.8766	3.45701	11.5948	0.443485
-158	22.75	29.5505	11.0889	7.42324	19.3812	0.792524
-46.01	-24.36	15.5864	7.89869	1.98432	9.9691	0.260509
-17.43	41.08	26.1422	9.49459	6.00983	16.0577	0.696105
-35.83	18.04	27.7725	10.2504	6.80358	17.7452	0.759788
-31.46	-11.24	29.9852	11.2854	7.51632	19.719	0.792467
-19.71	44.61	23.7646	8.54525	4.71352	13.6491	0.574426
162.12	-18.62	31.1238	11.7643	7.61632	20.4338	0.773305
-178.51	-20.45	29.7889	11.1974	7.47767	19.5704	0.792946
-94	2	20.9035	7.8111	3.29283	11.349	0.425427
-21.56	22.17	26.2643	9.5492	6.07384	16.1859	0.701653
4.14	-11.62	14.6916	8.07888	1.96755	10.1164	0.252859
-36.46	19.05	27.8125	10.2694	6.82089	17.7851	0.761011
-158	22.75	28.0005	10.3589	6.90067	17.9719	0.766507
-158	22.75	29.2005	10.927	7.32941	19.0881	0.790016
-35.2	-20.94	24.0278	8.63746	4.85712	13.901	0.588631
-158	22.75	29.8905	11.2431	7.49839	19.6481	0.792794
-175.67	-19.99	30.2733	11.4121	7.56238	19.9249	0.790343
-35.83	18.04	27.7725	10.2504	6.80358	17.7452	0.759788
-116.61	-6.08	21.5242	7.92547	3.57059	11.7685	0.455834
110	-26	24.528	8.82252	5.13206	14.3927	0.615375
110	-23	26.3537	9.58946	6.12036	16.2797	0.705649
110	-15.5	29.4161	11.027	7.38909	19.2707	0.791819
-8.77	42.36	17.8587	7.63547	2.28933	10.0641	0.306836
-21.71	33.62	24.1277	8.67341	4.91186	13.9978	0.594004
-25	-24.88	24.49	8.80802	5.11111	14.3548	0.613359
-8.44	43.42	20.1578	7.70871	2.98884	10.9126	0.391257
-26.47	-0.13	29.1417	10.8996	7.31213	19.0372	0.789385
-158	22.75	29.4905	11.0614	7.4083	19.3322	0.79225
110	-26	24.028	8.63752	4.85721	13.9011	0.58864
-158	22.75	28.9805	10.824	7.26254	18.8953	0.787356
-158	22.75	27.2205	9.98942	6.55217	17.1835	0.741043
-45	-28.7	22.7036	8.21314	4.15011	12.6938	0.517199
-29	-9.09	30.0993	11.336	7.53612	19.8024	0.791832
-19.56	44.63	23.4446	8.43823	4.54059	13.3504	0.557112
-158	22.75	30.1605	11.3629	7.5459	19.8461	0.791381
-158	22.75	27.7505	10.24	6.79398	17.7231	0.759106
-158	22.75	27.3805	10.0647	6.62723	17.3479	0.746815
-125.75	-9.32	21.3046	7.88203	3.46996	11.6145	0.444899
-35.8	21.41	27.2602	10.0081	6.57093	17.2243	0.742498
173.26	-33.44	22.8004	8.24067	4.20015	12.7766	0.522377
110	-27.5	22.767	8.23111	4.18285	12.7479	0.520589
-153.68	0	24.8725	8.95698	5.32192	14.7399	0.633476
-8.1	48.75	13.5135	8.36572	2.02473	10.4428	0.251342
110	-11.5	29.7889	11.1974	7.47767	19.5704	0.792946
-172.81	-19.5	28.0408	10.3781	6.91738	18.0116	0.767627
-8.92	42.26	17.9787	7.63042	2.31628	10.0894	0.310353
-57.27	41.56	23.4307	8.43371	4.53312	13.3376	0.556359
-32.57	24.33	26.8441	9.81381	6.3694	16.7931	0.726474
-24.99	-20.49	27.6857	10.2092	6.76552	17.6579	0.757066
-158	22.75	28.1005	10.4066	6.94187	18.0701	0.769249
-158	22.75	29.7505	11.18	7.46944	19.5405	0.792951
-158	22.75	27.1505	9.95659	6.51882	17.1113	0.738436
-8.77	42.36	18.2387	7.62273	2.37838	10.1513	0.31833
-158	22.75	28.8905	10.7816	7.23353	18.8146	0.786039
-158	22.75	26.3405	9.5835	6.11352	16.2659	0.705063
-158	22.75	28.3105	10.5066	7.02545	18.2738	0.774578
-158	22.75	29.8605	11.2297	7.49243	19.6254	0.79286
-49.82	-35.65	20.5426	7.75673	3.14142	11.1283	0.408536
-8.5	43.45	17.3778	7.66512	2.1923	9.98385	0.293801
-21.71	33.62	24.0377	8.64099	4.86253	13.9105	0.589163
4.14	-11.62	15.6116	7.89417	1.98561	9.96635	0.260809
-8.1	48.75	13.5035	8.36835	2.02557	10.4461	0.251368
-20	47.01	18.4873	7.61961	2.44251	10.2198	0.326407
-92.68	2.46	20.7182	7.78207	3.21415	11.2335	0.41668
-158	22.75	26.7805	9.78443	6.33778	16.7268	0.723887
-158	22.75	29.7905	11.1981	7.478	19.5716	0.792945
-21.22	17.79	27.4867	10.1149	6.67608	17.4563	0.750497
-37.26	35.91	20.9025	7.81094	3.29242	11.3484	0.425382
165	-19.5	31.2975	11.8314	7.61078	20.5173	0.767677
176.38	-20.71	30.0948	11.334	7.53537	19.7992	0.791863
-158	22.75	27.1705	9.96596	6.52838	17.1319	0.739186
-12.77	3.07	22.4331	8.13927	4.012	12.4678	0.502811
-46.12	-32.8	19.6065	7.65789	2.78701	10.6395	0.367929
-21.06	11.74	30.0493	11.3139	7.52769	19.7662	0.792143
-158	22.75	28.2805	10.4923	7.01376	18.245	0.773853
-158	22.75	26.2305	9.53404	6.05617	16.1504	0.700127
-8.77	42.36	17.6487	7.64659	2.2448	10.025	0.300934
-55.6	-47.59	8.67001	9.66756	2.79937	12.479	0.312841
47.49	-11.8	29.011	10.8383	7.27216	18.9223	0.787773
-158	22.75	28.9405	10.8052	7.24977	18.8595	0.786787
-20	47.01	17.0373	7.69498	2.13422	9.94705	0.28561
165	-19.5	31.2875	11.8276	7.61126	20.5127	0.768022
-25	-13.93	25.5966	9.25626	5.71812	15.4865	0.67017
-158	22.75	29.5305	11.0797	7.41831	19.3649	0.79244
-158	22.75	26.7605	9.7752	6.32778	16.7059	0.723065
-158	22.75	29.5005	11.066	7.41082	19.3404	0.7923
-26.47	-0.13	29.4217	11.0297	7.39059	19.2754	0.791855
-158	22.75	31.1505	11.7748	7.61585	20.4472	0.772489
-2.63	-5.86	18.1431	7.62503	2.35495	10.1274	0.31534
-158	22.75	27.7505	10.24	6.79398	17.7231	0.759106
-158	22.75	28.6805	10.6824	7.16229	18.6229	0.78247
-25.72	30.29	24.4614	8.79715	5.09534	14.3263	0.611839
-158	22.75	26.7605	9.7752	6.32778	16.7059	0.723065
110	-30.5	21.2396	7.86978	3.44062	11.57	0.441694
-53.86	41.85	23.7996	8.55729	4.73255	13.6823	0.576317
4.14	-11.62	20.7116	7.78108	3.21137	11.2295	0.41637
-158	22.75	28.9305	10.8005	7.24654	18.8506	0.786641
-158	22.75	29.5905	11.1072	7.43293	19.4136	0.792669
110	-30.5	21.2296	7.86792	3.43613	11.5632	0.441203
-158	22.75	26.9005	9.83998	6.39732	16.8519	0.728743
-158	22.75	29.5605	11.0935	7.42568	19.3893	0.792563
-49.82	-35.65	20.8926	7.80932	3.28813	11.3421	0.424907
-54.4	-43.48	14.6685	8.08401	1.96784	10.1215	0.252738
17.71	42.21	21.2778	7.87695	3.45785	11.5961	0.443577
-158	22.75	27.0005	9.88649	6.44635	16.9559	0.73269
-30.16	26.46	25.3485	9.15137	5.5832	15.2287	0.657849
-158	22.75	29.5505	11.0889	7.42324	19.3812	0.792524
110	-30.5	21.2296	7.86792	3.43613	11.5632	0.441203
-78.03	32.93	22.3434	8.11579	3.96684	12.3946	0.498074
-60.98	41.27	22.8476	8.2543	4.22466	12.8172	0.524906
-158	22.75	29.0705	10.8662	7.2906	18.9749	0.788542
-20.54	12.76	26.7515	9.77105	6.32328	16.6965	0.722695
-24.8	3.4	31.6144	11.9487	7.58485	20.6497	0.755382
-26.21	24.89	28.6284	10.6577	7.14388	18.5746	0.78148
-59.22	41.42	23.3574	8.41006	4.49383	13.2704	0.552391
-175.67	-19.99	28.1033	10.4079	6.943	18.0728	0.769323
-69.02	40.58	22.3035	8.10551	3.94685	12.3623	0.495973
-3.19	-20.44	21.3236	7.88565	3.47854	11.6275	0.445834
-95.99	-12.99	27.3261	10.0391	6.60187	17.292	0.74488
-37.05	35.75	20.9825	7.82421	3.32702	11.3997	0.429209
165	-19.5	31.1575	11.7775	7.61571	20.4506	0.772272
-158	22.75	27.1105	9.93786	6.49962	17.0699	0.736925
174.27	-20.75	31.3312	11.8442	7.60901	20.5326	0.766497
-158	22.75	28.1105	10.4113	6.94594	18.0799	0.769516
110	-27.5	22.657	8.20009	4.12613	12.6543	0.51471
-8.77	42.36	18.3087	7.62143	2.39597	10.1697	0.32056
-158	22.75	27.1105	9.93786	6.49962	17.0699	0.736925
-47.69	40.95	24.1832	8.6936	4.94232	14.052	0.596983
-34.9	22.23	27.4152	10.0811	6.6433	17.3834	0.748033
-158	22.75	29.4005	11.0199	7.38499	19.2577	0.791716
-158	22.75	26.9105	9.84462	6.40225	16.8623	0.729141
-45.28	-25.77	26.5252	9.66729	6.20873	16.4597	0.713152
-158	22.75	28.7005	10.6919	7.16929	18.6414	0.782839
172.12	-21.37	28.2612	10.4831	7.00618	18.2263	0.773379
-47.5	-27.6	23.8642	8.5797	4.76773	13.7438	0.579808
-158	22.75	26.7905	9.78904	6.34277	16.7372	0.724296
-22.87	32.68	24.3823	8.76734	5.0518	14.2478	0.607632
-78.15	32.91	22.9734	8.2913	4.29037	12.9268	0.531665
-8.77	42.36	17.7787	7.63937	2.27197	10.0485	0.30455
-158	22.75	30.4305	11.4799	7.58188	20.0305	0.78844
-16.08	5.86	19.2733	7.63745	2.67508	10.4955	0.354715
-21.22	17.79	27.4867	10.1149	6.67608	17.4563	0.750497
-158	22.75	29.3405	10.9921	7.36886	19.2074	0.79128
-20	47.01	17.0473	7.694	2.1358	9.9479	0.285838
110	-14	30.3264	11.4351	7.56943	19.9611	0.78976
-29.12	-20.32	28.8845	10.7788	7.23155	18.8092	0.785946
-75.3	17.75	22.2403	8.08944	3.91534	12.3115	0.492654
165	-19.5	31.1975	11.793	7.6147	20.4702	0.77101
-158	22.75	30.4305	11.4799	7.58188	20.0305	0.78844
-14.05	43.92	21.1575	7.85474	3.40395	11.5147	0.437677
-25	-13.93	25.5966	9.25626	5.71812	15.4865	0.67017
-34.83	-31.16	22.451	8.14402	4.02107	12.4825	0.50376
-158	22.75	29.0905	10.8756	7.29671	18.9924	0.788787
-158	22.75	29.5705	11.0981	7.42811	19.3974	0.7926
-34.84	-31.37	20.781	7.79164	3.24058	11.2722	0.419625
-158	22.75	27.8005	10.2637	6.81573	17.7732	0.760647
-8.77	42.36	18.4487	7.61982	2.43224	10.2085	0.325123
-144.5	-16.25	20.5469	7.75732	3.14318	11.1308	0.408734
-20	39.9	17.9933	7.62987	2.31964	10.0926	0.31079
-115.13	-5.55	21.7493	7.97339	3.67638	11.9327	0.467236
-158	22.75	29.5605	11.0935	7.42568	19.3893	0.792563
-158	22.75	27.1905	9.97534	6.53791	17.1526	0.739932
-158	22.75	27.1805	9.97065	6.53315	17.1422	0.73956
-158	22.75	27.2005	9.98003	6.54267	17.1629	0.740303
-25	-13.93	25.6066	9.26054	5.72354	15.4969	0.67066
-158	22.75	28.3405	10.5209	7.03705	18.3026	0.775291
0.6	-8.62	22.9489	8.28403	4.27755	12.9053	0.530349
-114.88	-5.46	21.2593	7.87347	3.44952	11.5835	0.442667
164.59	-19.22	31.6396	11.9577	7.58188	20.659	0.754286
-29.94	65.88	6.08939	9.92364	3.04787	12.9759	0.342084
172.53	-32.32	22.6886	8.20893	4.14239	12.6811	0.516398
-158	22.75	29.7305	11.171	7.46508	19.5249	0.792943
-158	22.75	30.4705	11.4969	7.58619	20.0566	0.787869
-158	22.75	27.3305	10.0412	6.60396	17.2966	0.74504
-158	22.75	29.1805	10.9177	7.32358	19.0708	0.789808
-24.8	3.4	30.9844	11.7092	7.6165	20.3615	0.77727
-158	22.75	26.9105	9.84462	6.40225	16.8623	0.729141
-158	22.75	27.6305	10.183	6.741	17.6022	0.755289
-109.35	-3.48	20.4702	7.74691	3.11201	11.0862	0.405227
-158	22.75	28.5405	10.616	7.11215	18.4924	0.779717
-177.58	-33	22.6246	8.19108	4.10947	12.627	0.51298
-158	22.75	28.8005	10.7392	7.2036	18.7331	0.784593
-158	22.75	28.9205	10.7958	7.24331	18.8416	0.786493
-124.45	-8.86	21.4475	7.90993	3.53517	11.714	0.451995
-21.22	17.79	27.4867	10.1149	6.67608	17.4563	0.750497
-158	22.75	27.2105	9.98473	6.54742	17.1732	0.740674
-158	22.75	30.8405	11.6511	7.61283	20.282	0.780865
-158	22.75	26.7505	9.77058	6.32277	16.6954	0.722653
176.75	-35.87	22.8303	8.24929	4.21567	12.8023	0.523979
-158	22.75	29.3005	10.9736	7.35784	19.1736	0.790953
-30	57.86	17.5399	7.65346	2.22305	10.0072	0.298005
-129.28	-10.6	21.305	7.8821	3.47014	11.6148	0.444918
110	-26	23.578	8.48215	4.61242	13.4739	0.564331
174.27	-20.75	29.9712	11.2792	7.51375	19.7087	0.792527
-158	22.75	29.3005	10.9736	7.35784	19.1736	0.790953
-158	22.75	26.1705	9.50721	6.02471	16.0874	0.697399
-178.32	-5	30.6548	11.5746	7.60248	20.1726	0.784776
-143.3	-15.73	20.5501	7.75777	3.1445	11.1327	0.408882
-16.08	5.86	29.7333	11.1722	7.46568	19.527	0.792944
-158	22.75	26.4505	9.63328	6.17038	16.3813	0.709911
-158	22.75	28.3605	10.5304	7.04474	18.3218	0.775759
-29	-13.05	29.4882	11.0603	7.40771	19.3303	0.792238
-158	22.75	29.1405	10.899	7.31176	19.0361	0.789371
-158	22.75	25.4805	9.2069	5.65513	15.3657	0.664441
-29.25	-24.44	26.6382	9.71891	6.26619	16.5779	0.717966
16.19	-28.93	26.3582	9.59148	6.12269	16.2844	0.705848
-25	-24.88	24.48	8.80422	5.1056	14.3448	0.612828
-33.31	-15.17	29.7002	11.1572	7.45836	19.5011	0.792915
-25	-13.93	28.4366	10.5666	7.07363	18.3943	0.777488
-158	22.75	28.5705	10.6302	7.12307	18.5205	0.780331
-26.4	-0.19	29.1817	10.9183	7.32394	19.0719	0.789821
-158	22.75	29.2605	10.955	7.34662	19.1395	0.790599
-22.94	7.58	25.1753	9.07956	5.48841	15.0499	0.649081
-172.81	-19.5	31.0608	11.7396	7.61686	20.4017	0.775156
-75.91	16.66	22.0696	8.04732	3.83104	12.1766	0.483739
-34.9	22.23	27.4352	10.0906	6.65252	17.4038	0.748729
-158	22.75	25.8105	9.34852	5.83345	15.71	0.680545
-8.1	48.75	13.4835	8.37362	2.02725	10.4528	0.251422
110	-36.5	15.3731	7.93823	1.97528	9.99552	0.258152
-158	22.75	29.7405	11.1755	7.46727	19.5327	0.792948
110	-18.5	25.5416	9.23281	5.6883	15.4292	0.667463
-158	22.75	28.2005	10.4542	6.98218	18.1676	0.77186
-76.56	15.48	22.1269	8.06125	3.85919	12.2215	0.486722
-116.53	-6.05	21.5842	7.93791	3.59853	11.8116	0.458855
-158	22.75	29.2105	10.9317	7.33231	19.0967	0.790117
170	-22	30.7357	11.6081	7.60775	20.2212	0.783172
-158	22.75	26.4805	9.64692	6.1858	16.4128	0.711217
110	-17	27.4148	10.0809	6.64309	17.3829	0.748017
-55	-43.58	11.2798	8.99524	2.32443	11.348	0.270649
-130.95	-11.15	21.3428	7.88934	3.48725	11.6408	0.446784
-54.73	-43.43	13.0198	8.49852	2.07229	10.6169	0.253353
-2.63	-5.86	24.3731	8.76387	5.04671	14.2387	0.607139
-158	22.75	27.2305	9.99412	6.55691	17.1938	0.741412
110	-36.5	15.3831	7.93633	1.97563	9.99416	0.258255
-158	22.75	29.7305	11.171	7.46508	19.5249	0.792943
-158	22.75	29.1105	10.885	7.30277	19.0099	0.789026
-158	22.75	28.1305	10.4208	6.95405	18.0995	0.770046
-158	22.75	27.1305	9.94722	6.50923	17.0906	0.737683
-158	22.75	28.2705	10.4875	7.00985	18.2353	0.773609
-158	22.75	31.2005	11.7942	7.61461	20.4716	0.770914
-158	22.75	29.5505	11.0889	7.42324	19.3812	0.792524
-75.28	17.78	22.7703	8.23205	4.18456	12.7507	0.520765
-158	22.75	30.5005	11.5097	7.58924	20.076	0.787418
-16.85	43.69	16.8879	7.71034	2.1115	9.93608	0.28229
174.27	-20.75	31.8212	12.0214	7.55641	20.7213	0.745886
-158	22.75	27.6105	10.1735	6.73207	17.582	0.754636
170	-22	31.5457	11.9238	7.59226	20.6232	0.758277
-158	22.75	29.8605	11.2297	7.49243	19.6254	0.79286
-158	22.75	27.8505	10.2875	6.83727	17.8231	0.762158
-158	22.75	29.3605	11.0014	7.37429	19.2242	0.791432
-158	22.75	27.3405	10.0459	6.60862	17.3069	0.745397
110	-36.5	15.3831	7.93633	1.97563	9.99416	0.258255
-158	22.75	28.3405	10.5209	7.03705	18.3026	0.775291
-158	22.75	28.1305	10.4208	6.95405	18.0995	0.770046
-31.4	-27.63	25.0203	9.01634	5.40331	14.8908	0.641136
-124.37	-8.83	21.5525	7.93132	3.58378	11.7888	0.45726
-158	22.75	28.7405	10.7108	7.18314	18.6782	0.783559
-158	22.75	29.9005	11.2476	7.50034	19.6557	0.792768
-158	22.75	27.2905	10.0223	6.58522	17.2555	0.743601
-158	22.75	28.9305	10.8005	7.24654	18.8506	0.786641
-46.12	-32.8	19.6065	7.65789	2.78701	10.6395	0.367929
-179.26	-34.73	23.1319	8.33928	4.37388	13.067	0.540209
-158	22.75	28.6505	10.6682	7.15172	18.5951	0.781904
-158	22.75	27.3105	10.0317	6.5946	17.2761	0.744323
-158	22.75	28.9205	10.7958	7.24331	18.8416	0.786493
-25.72	30.29	24.4214	8.78203	5.07331	14.2865	0.609712
-158	22.75	27.2805	10.0176	6.58051	17.2453	0.743239
178.64	-20.97	29.0809	10.8711	7.29379	18.984	0.78867
-119.39	-7.07	21.4869	7.91788	3.55335	11.742	0.453967
168	-20	30.6501	11.5726	7.60214	20.1697	0.784863
-158	22.75	29.7305	11.171	7.46508	19.5249	0.792943
-178.32	-5	30.7048	11.5954	7.60587	20.2028	0.783802
-52.68	41.95	23.7203	8.5301	4.68947	13.6073	0.572032
-77.22	14.33	22.0453	8.04146	3.8191	12.1576	0.482472
-158	22.75	27.4305	10.0883	6.65034	17.399	0.748565
-158	22.75	28.0805	10.397	6.9337	18.0505	0.768711
110	-29	21.3602	7.89273	3.49521	11.6529	0.447651
-21.61	44.46	23.9281	8.6021	4.80262	13.805	0.583259
-158	22.75	31.0605	11.7394	7.61686	20.4016	0.775165
-30	34.07	22.023	8.03615	3.80825	12.1404	0.481319
-133.41	-12.02	21.2994	7.88104	3.4676	11.6109	0.444642
-158	22.75	29.3005	10.9736	7.35784	19.1736	0.790953
-158	22.75	28.7405	10.7108	7.18314	18.6782	0.783559
-158	22.75	29.5505	11.0889	7.42324	19.3812	0.792524
-158	22.75	27.0305	9.90048	6.46095	16.987	0.733857
-108.12	-3.05	20.3159	7.7272	3.0504	10.9987	0.398261
-158	22.75	27.3805	10.0647	6.62723	17.3479	0.746815
176.38	-20.71	27.9748	10.3467	6.88993	17.9465	0.765781
-108.86	-3.32	20.9864	7.82487	3.32872	11.4022	0.429397
18.01	-33.62	19.1763	7.63295	2.64399	10.4566	0.351004
-158	22.75	31.2305	11.8058	7.61362	20.486	0.769939
-25	-13.93	28.4266	10.5618	7.06986	18.3848	0.777265
-158	22.75	28.7205	10.7013	7.17624	18.6598	0.783202
-158	22.75	26.0105	9.43618	5.9402	15.9195	0.690008
-80.04	9.85	29.8381	11.2196	7.48789	19.6082	0.792898
-158	22.75	27.4205	10.0836	6.64573	17.3888	0.748217
-16.89	43.79	16.9179	7.70715	2.11593	9.93803	0.282943
-158	22.75	29.9705	11.2789	7.51363	19.7082	0.79253
-158	22.75	29.8805	11.2386	7.49641	19.6406	0.792818
-158	22.75	27.2505	10.0035	6.56637	17.2144	0.742145
-158	22.75	26.6905	9.74296	6.29263	16.6327	0.720163
-76.78	33.83	22.8957	8.26833	4.24971	12.8589	0.527487
-158	22.75	28.0205	10.3684	6.90898	17.9916	0.767066
-141.22	-14.85	20.6418	7.77078	3.18227	11.1872	0.413118
170	-22	30.1757	11.3695	7.54824	19.8569	0.791257
-79.07	10.95	22.1845	8.07547	3.88764	12.2671	0.489731
-55	-43.58	11.2698	8.99812	2.32616	11.3525	0.270786
-30	49.44	20.619	7.76748	3.17281	11.1736	0.412059
178.64	-20.97	29.8009	11.2028	7.4802	19.5797	0.792939
-158	22.75	29.7405	11.1755	7.46727	19.5327	0.792948
-158	22.75	29.3605	11.0014	7.37429	19.2242	0.791432
-8.77	42.36	17.7287	7.64202	2.26137	10.0391	0.303144
-158	22.75	29.5305	11.0797	7.41831	19.3649	0.79244
-129.4	-23.28	24.874	8.9576	5.32277	14.7415	0.633556
-74.91	35.83	23.0612	8.3177	4.33655	13.0042	0.536397
-25.99	-28.79	22.5039	8.15817	4.0479	12.5262	0.506564
-158	22.75	29.1305	10.8943	7.30877	19.0274	0.789257
-15.41	44.96	23.1104	8.33269	4.36251	13.0478	0.539049
-158	22.75	27.9505	10.3351	6.87975	17.9225	0.765089
-158	22.75	28.0105	10.3637	6.90483	17.9817	0.766787
-78.7	32.56	23.189	8.35691	4.4041	13.118	0.543289
-9.7	48.45	29.2381	10.9445	7.34024	19.1204	0.790388
-24.8	3.4	31.7244	11.9877	7.57089	20.6893	0.750479
-22.94	7.58	23.9053	8.59408	4.79015	13.7831	0.582026
-158	22.75	28.9005	10.7863	7.2368	18.8236	0.786192
-113.71	-5.05	21.1637	7.85586	3.40671	11.5189	0.43798
-149.98	-17.75	20.1443	7.70722	2.98366	10.9054	0.390664
-39.63	43.02	25.3415	9.14846	5.57939	15.2215	0.657498
-8.79	42.23	18.0787	7.62693	2.33956	10.112	0.313364
-158	22.75	29.7505	11.18	7.46944	19.5405	0.792951
-80.03	31.2	23.0715	8.32082	4.34197	13.0133	0.536951
-158	22.75	27.0905	9.9285	6.48999	17.0492	0.736164
-24.99	-16.59	28.0048	10.361	6.90247	17.9761	0.766628
178.21	-26.99	27.1884	9.97436	6.53692	17.1504	0.739854
-105.81	-2.58	20.0146	7.69348	2.93448	10.8375	0.385029
-158	22.75	27.6105	10.1735	6.73207	17.582	0.754636
-158	22.75	28.8905	10.7816	7.23353	18.8146	0.786039
-117.63	-6.44	21.6081	7.94294	3.60973	11.829	0.460063
168	-20	31.0001	11.7155	7.61666	20.3699	0.776847
-158	22.75	29.1705	10.913	7.32064	19.0621	0.789701
-144.4	-16.2	20.5369	7.75594	3.1391	11.125	0.408275
-25	-13.93	25.6066	9.26054	5.72354	15.4969	0.67066
-158	22.75	29.9905	11.2878	7.51729	19.723	0.792444
-34.84	-31.37	22.331	8.11259	3.96063	12.3845	0.497422
-29.94	65.88	7.70939	9.83223	2.94115	12.7818	0.327445
-30.16	26.46	25.8185	9.35201	5.83775	15.7183	0.680928
-158	22.75	27.0205	9.89581	6.45609	16.9766	0.733469
-158	22.75	28.8905	10.7816	7.23353	18.8146	0.786039
-100.63	-16.96	25.1547	9.0711	5.47712	15.0287	0.648031
-158	22.75	27.0605	9.91448	6.4755	17.0181	0.735014
-158	22.75	28.7405	10.7108	7.18314	18.6782	0.783559
172.12	-21.37	28.2612	10.4831	7.00618	18.2263	0.773379
-158	22.75	28.4805	10.5875	7.09004	18.4359	0.778449
-74.91	35.1	22.1103	8.05719	3.85103	12.2085	0.485858
-158	22.75	28.9205	10.7958	7.24331	18.8416	0.786493
-158	22.75	26.7705	9.77981	6.33278	16.7163	0.723476
-158	22.75	27.4505	10.0978	6.65953	17.4194	0.749257
-12.77	3.07	28.1231	10.4173	6.95104	18.0922	0.769849
-158	22.75	28.8205	10.7486	7.21033	18.7513	0.784926
-45.15	-26.03	26.1443	9.49552	6.01092	16.0599	0.6962
-176.33	-32.37	22.5076	8.15915	4.04976	12.5292	0.506759
-29.3	27.21	26.0498	9.45356	5.96104	15.9608	0.69184
-140.28	-8.91	27.3307	10.0412	6.60404	17.2968	0.745047
-158	22.75	28.3405	10.5209	7.03705	18.3026	0.775291
-46.12	-32.8	19.6065	7.65789	2.78701	10.6395	0.367929
-158	22.75	28.7105	10.6966	7.17277	18.6506	0.783021
-26.32	44.02	24.3647	8.76074	5.04211	14.2304	0.606693
-8.44	43.42	17.9578	7.63123	2.31151	10.0849	0.309734
-158	22.75	27.0305	9.90048	6.46095	16.987	0.733857
-158	22.75	28.1205	10.4161	6.95	18.0897	0.769782
-30	57.86	17.5599	7.65214	2.22698	10.0103	0.298537
-53.3	-39.35	20.544	7.75692	3.142	11.1291	0.408602
-158	22.75	30.9805	11.7076	7.61645	20.3594	0.777374
-20.54	12.76	32.1815	12.1401	7.48384	20.8163	0.726423
-158	22.75	27.0305	9.90048	6.46095	16.987	0.733857
-52.19	-37.81	17.8186	7.63738	2.28057	10.0562	0.305684
-158	22.75	27.4905	10.1167	6.67784	17.4602	0.750628
-158	22.75	28.3405	10.5209	7.03705	18.3026	0.775291
-158	22.75	28.9405	10.8052	7.24977	18.8595	0.786787
-21.88	26.28	25.0298	9.02016	5.40849	14.9004	0.641622
-158	22.75	29.1405	10.899	7.31176	19.0361	0.789371
-77.8	13.27	22.5028	8.15787	4.04733	12.5253	0.506505
-158	22.75	30.0205	11.3011	7.52266	19.7451	0.792299
-158	22.75	27.0105	9.89115	6.45122	16.9663	0.73308
-25	-13.93	28.4366	10.5666	7.07363	18.3943	0.777488
-158	22.75	28.7705	10.725	7.19342	18.7057	0.784083
168	-20	30.9901	11.7115	7.61656	20.3646	0.777117
-30.16	26.46	26.1585	9.50186	6.0184	16.0748	0.696851
-16.08	5.86	19.0233	7.62717	2.59625	10.398	0.345265
-158	22.75	27.8005	10.2637	6.81573	17.7732	0.760647
-158	22.75	29.3905	11.0152	7.38233	19.2494	0.791648
-158	22.75	28.7305	10.7061	7.1797	18.669	0.783381
-158	22.75	27.4205	10.0836	6.64573	17.3888	0.748217
-21.01	13.8	23.1498	8.34477	4.38331	13.0829	0.541171
-55.6	-47.59	8.72001	9.65729	2.791	12.4605	0.312018
-12.63	-4.47	25.1688	9.07686	5.48482	15.0431	0.648747
-36.6	24.87	30.1867	11.3744	7.54991	19.8646	0.791164
-158	22.75	28.6405	10.6634	7.14818	18.5858	0.781713
-158	22.75	27.8005	10.2637	6.81573	17.7732	0.760647
-33.31	-15.17	29.6902	11.1527	7.45611	19.4932	0.792902
-158	22.75	27.7805	10.2542	6.80705	17.7532	0.760035
-158	22.75	29.1905	10.9224	7.3265	19.0794	0.789913
-30	50.84	19.7315	7.66755	2.83097	10.6976	0.373061
-9.7	48.45	16.5781	7.74646	2.06979	9.92324	0.275944
-178.51	-20.45	28.3089	10.5058	7.02484	18.2723	0.77454
-158	22.75	27.0905	9.9285	6.48999	17.0492	0.736164
-26.34	24.63	28.4284	10.5627	7.07056	18.3865	0.777307
-158	22.75	30.0805	11.3277	7.533	19.7888	0.791955
-12.63	-4.47	24.7788	8.91987	5.2703	14.6449	0.628585
-158	22.75	30.5505	11.5308	7.59398	20.1078	0.786621
-20	39.9	18.0033	7.6295	2.32195	10.0948	0.311089
-158	22.75	27.6705	10.202	6.75879	17.6426	0.75658
-43.65	41.19	24.3893	8.76997	5.05567	14.2548	0.608006
-46.01	-24.36	18.3264	7.62115	2.40049	10.1744	0.321131
-158	22.75	27.5205	10.1309	6.69149	17.4907	0.751645
-28.21	-3.92	29.5685	11.0971	7.42761	19.3958	0.792593
39.56	-21.38	27.15	9.95634	6.51857	17.1107	0.738417
-8.36	43.37	21.0606	7.83756	3.36111	11.4505	0.432969
-158	22.75	26.3605	9.59253	6.12389	16.2869	0.705951
110	-24.5	23.8357	8.5698	4.75222	13.7167	0.578269
-158	22.75	29.6705	11.1437	7.45163	19.4776	0.792871
-158	22.75	29.5805	11.1026	7.43052	19.4055	0.792636
-158	22.75	29.1405	10.899	7.31176	19.0361	0.789371
-158	22.75	29.5805	11.1026	7.43052	19.4055	0.792636
-158	22.75	26.3105	9.56998	6.09792	16.2344	0.703725
-158	22.75	26.7005	9.74756	6.29767	16.6432	0.72058
-77.8	13.23	23.1328	8.33955	4.37434	13.0678	0.540256
-158	22.75	27.0405	9.90515	6.4658	16.9974	0.734244
-158	22.75	28.8405	10.7581	7.21702	18.7694	0.785252
-158	22.75	29.4605	11.0476	7.40065	19.3075	0.792088
-158	22.75	29.6505	11.1346	7.44704	19.4617	0.792832
-158	22.75	29.2205	10.9363	7.3352	19.1053	0.790217
-158	22.75	29.2205	10.9363	7.3352	19.1053	0.790217
-158	22.75	26.4805	9.64692	6.1858	16.4128	0.711217
-158	22.75	28.1105	10.4113	6.94594	18.0799	0.769516
-110.7	-3.98	21.0679	7.83885	3.36435	11.4553	0.433326
0.6	-8.62	21.0389	7.83381	3.35162	11.4363	0.431923
-158	22.75	27.3305	10.0412	6.60396	17.2966	0.74504
-158	22.75	29.4205	11.0291	7.39026	19.2744	0.791847
-178.37	-33.42	22.6262	8.19155	4.11034	12.6284	0.51307
-24.99	-16.59	28.0348	10.3753	6.91491	18.0057	0.767463
-20	24.51	18.3761	7.62049	2.41326	10.188	0.32274
-158	22.75	29.4205	11.0291	7.39026	19.2744	0.791847
-158	22.75	28.0105	10.3637	6.90483	17.9817	0.766787
-37.88	43.15	25.2033	9.09109	5.50376	15.0787	0.650507
164.59	-19.22	30.0596	11.3185	7.52946	19.7737	0.792083
170	-22	30.6757	11.5833	7.60395	20.1853	0.784376
-158	22.75	29.1805	10.9177	7.32358	19.0708	0.789808
-21	21.95	28.1307	10.4209	6.95412	18.0996	0.77005
-30	57.86	17.5699	7.65149	2.22896	10.0119	0.298804
-158	22.75	29.2205	10.9363	7.3352	19.1053	0.790217
16.45	-29.52	27.0174	9.89435	6.45456	16.9734	0.733347
170	-22	29.3057	10.9759	7.35927	19.178	0.790997
-24.02	5.17	31.5054	11.9091	7.59614	20.6071	0.759913
-79.28	10.51	22.3493	8.11733	3.96982	12.3994	0.498388
-115.13	-5.58	21.4693	7.91432	3.54523	11.7295	0.453086
-17.51	36.61	31.7729	12.0047	7.56389	20.7056	0.74821
-30	57.86	17.5099	7.65549	2.21721	10.0026	0.297212
-158	22.75	26.7105	9.75216	6.3027	16.6536	0.720997
-158	22.75	26.7105	9.75216	6.3027	16.6536	0.720997
-158	22.75	28.5905	10.6397	7.1303	18.5392	0.780734
-158	22.75	29.4605	11.0476	7.40065	19.3075	0.792088
-158	22.75	28.5805	10.635	7.12669	18.5299	0.780533
-158	22.75	28.7305	10.7061	7.1797	18.669	0.783381
-158	22.75	26.7905	9.78904	6.34277	16.7372	0.724296
-158	22.75	28.5105	10.6017	7.10114	18.4642	0.77909
-158	22.75	30.4105	11.4713	7.57963	20.0174	0.788712
-158	22.75	29.4205	11.0291	7.39026	19.2744	0.791847
-158	22.75	28.9405	10.8052	7.24977	18.8595	0.786787
-158	22.75	29.8805	11.2386	7.49641	19.6406	0.792818
-158	22.75	20.6205	7.76771	3.17346	11.1745	0.412131
-158	22.75	28.5405	10.616	7.11215	18.4924	0.779717
-17.43	41.08	16.1622	7.80373	2.02512	9.92665	0.268568
110	-29	21.8102	7.98693	3.70542	11.9781	0.470349
-21.88	26.28	24.9298	8.97987	5.35347	14.7983	0.636452
-158	22.75	26.9505	9.86321	6.42191	16.9039	0.730728
39.88	18.4	31.7047	11.9808	7.57359	20.6824	0.751383
-8.77	42.36	17.7287	7.64202	2.26137	10.0391	0.303144
-179.26	-34.73	24.3919	8.77095	5.0571	14.2574	0.608144
-12.77	3.07	24.2431	8.71556	4.9752	14.1106	0.600192
-83.93	5.6	19.9602	7.68806	2.91415	10.8097	0.382692
-158	22.75	27.1205	9.94254	6.50443	17.0802	0.737304
-20	24.51	19.8861	7.68102	2.88684	10.7726	0.37954
-158	22.75	27.6405	10.1877	6.74546	17.6123	0.755613
-158	22.75	29.4205	11.0291	7.39026	19.2744	0.791847
-20	39.9	17.9933	7.62987	2.31964	10.0926	0.31079
-9.7	48.45	29.2281	10.9399	7.33738	19.1118	0.790292
-158	22.75	26.1105	9.48048	5.99312	16.0244	0.694647
-21.88	26.28	24.9298	8.97987	5.35347	14.7983	0.636452
164.65	-19.22	31.3996	11.8699	7.6047	20.5629	0.764005
-75.95	16.6	22.7396	8.22332	4.16869	12.7245	0.519124
-158	22.75	28.9605	10.8146	7.25618	18.8774	0.787075
-158	22.75	26.4705	9.64237	6.18067	16.4023	0.710782
-19.49	9.71	31.237	11.8082	7.61339	20.4891	0.769726
-158	22.75	26.9105	9.84462	6.40225	16.8623	0.729141
165	-19.5	30.0075	11.2953	7.52035	19.7355	0.792364
-78.15	12.65	23.0526	8.31508	4.33198	12.9965	0.535929
-158	22.75	26.4005	9.61062	6.14459	16.3289	0.707718
-158	22.75	29.1505	10.9037	7.31473	19.0448	0.789483
-158	22.75	30.1205	11.3453	7.53958	19.8176	0.791685
-158	22.75	27.6405	10.1877	6.74546	17.6123	0.755613
178.32	22	28.5315	10.6117	7.10885	18.4839	0.77953
168	-20	30.6501	11.5726	7.60214	20.1697	0.784863
-12.63	-4.47	24.3188	8.74358	5.01682	14.185	0.60424
179	16	29.3229	10.984	7.36404	19.1926	0.79114
-158	22.75	29.0805	10.8709	7.29366	18.9837	0.788665
-21.88	26.28	24.9198	8.97586	5.34797	14.7881	0.635934
-158	22.75	27.7705	10.2495	6.8027	17.7431	0.759726
-158	22.75	28.5405	10.616	7.11215	18.4924	0.779717
-158	22.75	29.7105	11.1619	7.46065	19.5092	0.792927
-24.99	-16.59	28.0348	10.3753	6.91491	18.0057	0.767463
-75.3	17.75	22.2503	8.09197	3.92031	12.3195	0.493179
-123.46	-8.67	21.4591	7.91225	3.5405	11.7222	0.452573
-158	22.75	27.3305	10.0412	6.60396	17.2966	0.74504
-158	22.75	27.1005	9.93318	6.49481	17.0595	0.736545
-172.81	-19.5	31.1208	11.7632	7.61636	20.4323	0.773394
178.32	22	28.3315	10.5166	7.03358	18.294	0.775078
-158	22.75	27.6705	10.202	6.75879	17.6426	0.75658
-173.63	-30.57	22.0834	8.05064	3.83777	12.1874	0.484453
-158	22.75	27.8605	10.2923	6.84156	17.8331	0.762457
-21.3	44.5	23.5391	8.46925	4.59146	13.4378	0.562228
-55.6	-47.59	8.72001	9.65729	2.791	12.4605	0.312018
-29.75	43.7	24.7987	8.92775	5.28131	14.6651	0.62963
-158	22.75	27.4405	10.0931	6.65494	17.4092	0.748911
-158	22.75	27.4505	10.0978	6.65953	17.4194	0.749257
-79.53	30.56	22.797	8.2397	4.19839	12.7736	0.522194
-158	22.75	27.8505	10.2875	6.83727	17.8231	0.762158
-25.78	1.29	29.598	11.1107	7.43472	19.4196	0.792693
-158	22.75	29.0405	10.8522	7.28136	18.9484	0.788161
-21.47	21.76	24.7507	8.90882	5.25482	14.6165	0.627114
-158	22.75	26.8905	9.83534	6.39239	16.8415	0.728343
110	-29	21.8102	7.98693	3.70542	11.9781	0.470349
-18.21	47.37	19.2141	7.63462	2.65602	10.4716	0.352442
-30	36.78	22.641	8.19565	4.11792	12.6409	0.513858
-8.36	43.37	17.6506	7.64648	2.24518	10.0253	0.300985
-22.28	9.05	31.9564	12.0672	7.53268	20.7615	0.739026
-159	31.52	27.8889	10.3058	6.85369	17.8614	0.763299
164.65	-19.22	31.4696	11.8959	7.59929	20.5925	0.76133
-56.55	40.8	23.7499	8.5402	4.70552	13.6352	0.57363
-158	22.75	30.4005	11.467	7.57848	20.0108	0.788845
-22.94	7.58	30.3953	11.4648	7.57787	20.0073	0.788913
-158	22.75	27.0405	9.90515	6.4658	16.9974	0.734244
-29.94	65.88	6.48939	9.92744	3.04209	12.9747	0.340135
-158	22.75	30.1205	11.3453	7.53958	19.8176	0.791685
-158	22.75	29.8505	11.2252	7.49041	19.6177	0.792878
-158	22.75	27.3205	10.0364	6.59928	17.2864	0.744682
-77.24	14.03	22.9205	8.27563	4.26269	12.8805	0.528822
-55.6	-47.59	8.73001	9.65522	2.78931	12.4568	0.311853
-20	47.01	17.0073	7.69795	2.12952	9.9446	0.28493
47.48	-11.6	29.7517	11.1806	7.4697	19.5414	0.792952
-139.6	25.77	24.8434	8.94544	5.30593	14.7105	0.631963
-116.35	-5.98	21.7394	7.9712	3.67165	11.9253	0.466728
-158	22.75	25.8705	9.37468	5.8656	15.7728	0.683409
-29	25.65	26.4204	9.61962	6.15486	16.3497	0.708592
-52.28	41.98	25.2644	9.11636	5.53723	15.1418	0.653608
-17.43	41.08	31.4722	11.8969	7.59907	20.5936	0.761229
-158	22.75	28.6005	10.6444	7.13389	18.5486	0.780932
-158	22.75	26.5505	9.67881	6.22164	16.4862	0.714238
-158	22.75	28.3105	10.5066	7.02545	18.2738	0.774578
-158	22.75	30.1105	11.3409	7.53795	19.8105	0.791756
-158	22.75	29.8605	11.2297	7.49243	19.6254	0.79286
-158	22.75	28.5305	10.6112	7.10849	18.483	0.77951
-158	22.75	27.9705	10.3446	6.88814	17.9423	0.76566
-6.17	-2.81	24.0386	8.64131	4.86301	13.9114	0.589211
-158	22.75	27.4105	10.0789	6.64112	17.3786	0.747868
-12.72	-1.36	21.0305	7.83236	3.34792	11.4308	0.431515
-26.33	24.67	28.4884	10.5912	7.09299	18.4434	0.77862
164.65	-19.22	31.4496	11.8885	7.60094	20.5842	0.762108
-158	22.75	27.2005	9.98003	6.54267	17.1629	0.740303
-20.54	12.76	23.2815	8.38592	4.45332	13.2015	0.54829
-158	22.75	28.3205	10.5113	7.02933	18.2834	0.774817
-158	22.75	28.0905	10.4018	6.93779	18.0603	0.76898
-124.64	-8.93	21.3675	7.89414	3.49853	11.658	0.448012
-158	22.75	28.8005	10.7392	7.2036	18.7331	0.784593
18.01	-33.62	13.5563	8.35448	2.02121	10.4286	0.251238
-158	22.75	26.4905	9.65147	6.19094	16.4233	0.711651
-27.34	-2.02	29.0059	10.8359	7.27055	18.9178	0.787704
-20.01	39.87	19.8033	7.6736	2.85674	10.732	0.376055
-13.98	48.06	15.7461	7.87061	1.99322	9.95305	0.262494
-14.3	-7.23	25.8866	9.38174	5.87422	15.7897	0.684175
47.46	-11.64	29.5517	11.0895	7.42353	19.3822	0.792528
-158	22.75	27.0405	9.90515	6.4658	16.9974	0.734244
-127.2	-9.83	21.3784	7.89627	3.50351	11.6656	0.448554
-158	22.75	28.2605	10.4828	7.00592	18.2257	0.773363
-158	22.75	29.6905	11.1528	7.45617	19.4934	0.792903
-158	22.75	27.0205	9.89581	6.45609	16.9766	0.733469
-158	22.75	28.9005	10.7863	7.2368	18.8236	0.786192
-158	22.75	30.0005	11.2922	7.51909	19.7304	0.792398
-158	22.75	29.0005	10.8334	7.26886	18.913	0.787631
110	-29	21.8202	7.98917	3.7102	11.9856	0.470861
-158	22.75	27.5005	10.1214	6.6824	17.4704	0.750968
-158	22.75	27.0405	9.90515	6.4658	16.9974	0.734244
-158	22.75	28.9205	10.7958	7.24331	18.8416	0.786493
-158	22.75	27.1105	9.93786	6.49962	17.0699	0.736925
-148.89	25.02	25.7286	9.31299	5.7894	15.6243	0.676599
-10.64	47.96	19.1438	7.63158	2.63369	10.4439	0.34977
-30	38.48	25.5795	9.24896	5.70886	15.4687	0.66933
-158	22.75	25.6505	9.27937	5.7473	15.5428	0.672808
-13.2	-1.37	23.4317	8.43402	4.53363	13.3385	0.556411
-158	22.75	25.7405	9.31816	5.79584	15.6368	0.677177
-158	22.75	28.8605	10.7675	7.22366	18.7876	0.785572
66.42	-9.39	30.7747	11.6242	7.60987	20.2441	0.782343
-49.82	-35.65	20.8926	7.80932	3.28813	11.3421	0.424907
-158	22.75	29.7905	11.1981	7.478	19.5716	0.792945
-148.89	25.02	25.7386	9.31731	5.79478	15.6347	0.677083
-158	22.75	26.6605	9.72917	6.2775	16.6013	0.718907
26.29	-35.19	22.677	8.20568	4.13641	12.6713	0.515778
-30	34.07	25.813	9.34962	5.83481	15.7126	0.680665
-151.81	-18.81	19.8684	7.67939	2.88035	10.7638	0.378791
-158	22.75	24.7505	8.90876	5.25473	14.6163	0.627105
-17.44	5.98	30.3391	11.4406	7.57105	19.9697	0.789612
17.4	39.84	21.1665	7.85636	3.40794	11.5207	0.438114
-26.3	24.7	28.5084	10.6007	7.10038	18.4622	0.779046
-158	22.75	27.5805	10.1593	6.71861	17.5516	0.753649
-158	22.75	26.9805	9.87717	6.43659	16.9351	0.731908
179.82	-30.1	26.0537	9.45528	5.96309	15.9648	0.69202
-158	22.75	29.8805	11.2386	7.49641	19.6406	0.792818
-36.59	24.94	30.1667	11.3656	7.54686	19.8505	0.791331
-158	22.75	27.7705	10.2495	6.8027	17.7431	0.759726
-9.7	48.45	29.2381	10.9445	7.34024	19.1204	0.790388
-48.88	42.27	25.1115	9.05343	5.45342	14.9843	0.645824
-158	22.75	27.6705	10.202	6.75879	17.6426	0.75658
-17.05	32.43	28.1482	10.4293	6.96119	18.1167	0.77051
-164.08	-25.8	20.6979	7.77903	3.20564	11.2212	0.41573
-40.08	42.98	24.7129	8.89401	5.23398	14.5783	0.62513
-158	22.75	27.3105	10.0317	6.5946	17.2761	0.744323
-125.68	-9.3	21.4046	7.90142	3.51549	11.6839	0.449857
-75.35	34.71	22.5147	8.16108	4.0534	12.5352	0.507139
-158	22.75	28.1005	10.4066	6.94187	18.0701	0.769249
-158	22.75	29.5005	11.066	7.41082	19.3404	0.7923
-24.02	5.17	31.2554	11.8153	7.61267	20.4978	0.769112
110	-24.5	23.4357	8.43534	4.53582	13.3422	0.556631
-158	22.75	28.5505	10.6207	7.1158	18.5018	0.779923
-178	-15	30.3652	11.4518	7.57428	19.9872	0.789296
-158	22.75	27.7605	10.2447	6.79835	17.7331	0.759417
-158	22.75	29.7205	11.1664	7.46287	19.517	0.792936
-158	22.75	29.9805	11.2833	7.51546	19.7156	0.792488
-28.21	-3.92	29.9685	11.278	7.51325	19.7066	0.792538
-177.07	-32.73	22.689	8.20904	4.14258	12.6814	0.516418
-158	22.75	29.2905	10.9689	7.35506	19.1651	0.790867
-148.89	25.02	25.7486	9.32164	5.80016	15.6452	0.677565
168	-20	28.6901	10.6869	7.16566	18.6318	0.782648
-51.99	40.88	24.6857	8.88339	5.21899	14.5509	0.623701
-158	22.75	28.8005	10.7392	7.2036	18.7331	0.784593
-139.6	25.77	24.8434	8.94544	5.30593	14.7105	0.631963
-55	-43.58	11.2998	8.98948	2.32097	11.3389	0.270376
-36.13	43.32	24.8465	8.94666	5.30762	14.7136	0.632123
164.65	-19.22	31.2196	11.8016	7.614	20.4808	0.770295
-145.9	-16.76	20.4417	7.74315	3.10052	11.0698	0.403931
-148.89	25.02	25.7486	9.32164	5.80016	15.6452	0.677565
-158	22.75	27.5905	10.164	6.7231	17.5618	0.75398
-158	22.75	27.8605	10.2923	6.84156	17.8331	0.762457
-158	22.75	27.2505	10.0035	6.56637	17.2144	0.742145
-158	22.75	29.7305	11.171	7.46508	19.5249	0.792943
-9.23	47.43	22.8955	8.26827	4.24961	12.8587	0.527476
-158	22.75	30.0805	11.3277	7.533	19.7888	0.791955
-158	22.75	28.0605	10.3875	6.92549	18.0309	0.768168
-77.23	14.28	22.6553	8.1996	4.12522	12.6529	0.514617
-14.84	-8.02	25.8664	9.37288	5.86339	15.7685	0.683212
-76.7	15.27	22.2269	8.08607	3.90867	12.3008	0.491952
-166.4	-27.07	20.9771	7.82328	3.32464	11.3961	0.428946
-158	22.75	28.5805	10.635	7.12669	18.5299	0.780533
-16.08	5.86	27.5633	10.1511	6.71084	17.5341	0.753077
110	-33.5	18.706	7.62032	2.5027	10.2874	0.333866
-158	22.75	27.6805	10.2067	6.76321	17.6527	0.7569
-8.4	43.39	20.1506	7.70791	2.98605	10.9087	0.390938
26.31	-35.25	22.667	8.20288	4.13127	12.6628	0.515244
-45.3	42.56	24.7869	8.92307	5.27477	14.6531	0.629009
-8.83	42.36	17.8687	7.63502	2.29154	10.0662	0.307125
167.98	-25.18	20.9203	7.81385	3.30008	11.3597	0.42623
-19.49	9.71	31.337	11.8464	7.60868	20.5352	0.766291
-9.7	48.45	17.1581	7.68356	2.15381	9.95822	0.288415
-158	22.75	29.7905	11.1981	7.478	19.5716	0.792945
-158	22.75	28.5905	10.6397	7.1303	18.5392	0.780734
-20.54	12.76	32.1515	12.1306	7.49103	20.8099	0.728189
-158	22.75	26.2705	9.55199	6.07708	16.1924	0.701932
-158	22.75	27.1805	9.97065	6.53315	17.1422	0.73956
-22.28	9.05	26.1664	9.50537	6.02254	16.0831	0.697211
-158	22.75	28.7405	10.7108	7.18314	18.6782	0.783559
110	-35	18.1319	7.62534	2.35226	10.1247	0.314995
-20.01	39.87	19.8133	7.67447	2.86035	10.7369	0.376474
-30	57.86	17.4999	7.65618	2.21528	10.0011	0.296949
-8.44	43.42	18.6578	7.61988	2.48913	10.2719	0.332194
-158	22.75	29.5905	11.1072	7.43293	19.4136	0.792669
-45.08	-26.18	25.8543	9.3676	5.85692	15.7558	0.682637
-8.44	43.42	17.5678	7.65163	2.22854	10.0116	0.298747
-153.42	23.91	25.8341	9.35877	5.84608	15.7346	0.681671
-158	22.75	28.2205	10.4637	6.99013	18.187	0.772367
-17.51	36.61	31.7829	12.0082	7.56238	20.7089	0.747734
-158	22.75	29.1805	10.9177	7.32358	19.0708	0.789808
-174.32	-31.32	22.2461	8.09092	3.91824	12.3162	0.492961
-158	22.75	27.1005	9.93318	6.49481	17.0595	0.736545
169.35	-27.4	21.6251	7.94653	3.61769	11.8413	0.460921
-75.95	16.56	22.6011	8.18461	4.09746	12.6073	0.511731
-22.94	7.58	30.0553	11.3165	7.52872	19.7705	0.792109
-158	22.75	29.5605	11.0935	7.42568	19.3893	0.792563
-158	22.75	28.3205	10.5113	7.02933	18.2834	0.774817
-158	22.75	27.7005	10.2162	6.77204	17.6728	0.757536
-131.5	-11.35	21.3307	7.88702	3.48178	11.6325	0.446188
-57.29	-50.99	9.32864	9.5213	2.68386	12.2203	0.301775
-88.38	25.51	27.8355	10.2804	6.83084	17.8082	0.761709
-153.42	23.91	25.8341	9.35877	5.84608	15.7346	0.681671
-158	22.75	27.0305	9.90048	6.46095	16.987	0.733857
179.82	-30.1	25.5937	9.25503	5.71656	15.4835	0.670028
-158	22.75	27.0305	9.90048	6.46095	16.987	0.733857
-153.42	23.91	25.8341	9.35877	5.84608	15.7346	0.681671
-55	-43.58	11.2598	9.001	2.3279	11.357	0.270923
-30	41.19	24.9534	8.98935	5.36648	14.8224	0.637677
-25.78	1.29	29.608	11.1152	7.43709	19.4277	0.792724
-158	22.75	26.4605	9.63783	6.17553	16.3918	0.710347
-30	36.78	24.231	8.71113	4.96859	14.0988	0.599547
168.1	-26	21.3988	7.90027	3.51282	11.6798	0.449567
-43.46	42.71	24.6928	8.88616	5.2229	14.558	0.624074
-30	38.48	25.9495	9.40929	5.90774	15.8555	0.687146
-20.66	12.75	32.3415	12.1894	7.44183	20.8457	0.716544
-30	59.35	16.5664	7.74794	2.06836	9.92302	0.275719
-158	22.75	28.5505	10.6207	7.1158	18.5018	0.779923
-158	22.75	26.0805	9.46716	5.97727	15.993	0.693262
-158	22.75	29.4605	11.0476	7.40065	19.3075	0.792088
-158	22.75	28.6905	10.6871	7.1658	18.6321	0.782655
110	-35	18.1219	7.62563	2.34985	10.1223	0.314686
-20.01	39.87	19.9333	7.68546	2.90422	10.7962	0.381546
-158	22.75	26.6705	9.73377	6.28255	16.6118	0.719327
-158	22.75	27.0305	9.90048	6.46095	16.987	0.733857
-158	22.75	27.0305	9.90048	6.46095	16.987	0.733857
-78.61	11.79	22.8413	8.25248	4.2214	12.8118	0.52457
-139.6	25.77	24.9334	8.98134	5.3555	14.802	0.636643
-158	22.75	27.5005	10.1214	6.6824	17.4704	0.750968
-25.99	-28.79	22.5439	8.16898	4.06825	12.5594	0.508688
-158	22.75	26.6105	9.70625	6.25217	16.549	0.716797
110	-35	18.1319	7.62534	2.35226	10.1247	0.314995
-175	-31.66	22.3308	8.11253	3.96051	12.3843	0.497409
-45.08	-26.18	26.0643	9.45997	5.9687	15.9759	0.692511
-13.98	48.06	14.8361	8.04733	1.96656	10.0863	0.253701
-158	22.75	26.7305	9.76137	6.31275	16.6745	0.721827
110	-33.5	18.676	7.62003	2.49424	10.2777	0.332824
110	-32	20.1473	7.70754	2.98479	10.9069	0.390794
-158	22.75	29.8405	11.2207	7.48838	19.6101	0.792894
-139.45	-14.13	20.9809	7.82393	3.3263	11.3986	0.429129
179.4	4.66	31.7429	11.9942	7.56827	20.6956	0.74962
-158	22.75	27.6905	10.2115	6.76763	17.6628	0.757219
-127.31	-9.54	21.2716	7.87578	3.45504	11.5919	0.44327
169.56	-27.71	21.6551	7.95292	3.63179	11.8632	0.462441
-22.28	9.05	31.6964	11.9779	7.57469	20.6795	0.751759
-158	22.75	29.4805	11.0568	7.40576	19.324	0.792198
-17.51	36.61	16.2229	7.79476	2.03084	9.92471	0.269562
-41.35	-29.31	19.996	7.6916	2.92752	10.828	0.384229
-74.8	24.03	22.4594	8.14625	4.02532	12.4894	0.504205
-57.29	-50.99	9.32864	9.5213	2.68386	12.2203	0.301775
-158	22.75	29.3205	10.9828	7.36337	19.1905	0.79112
-26.4	-0.19	30.8817	11.6679	7.61427	20.3053	0.779886
-158	22.75	26.7105	9.75216	6.3027	16.6536	0.720997
-24.02	5.17	31.7654	12.0021	7.56501	20.7031	0.748566
-55	-43.58	11.2498	9.00388	2.32964	11.3616	0.271061
170	-28.42	21.9287	8.01395	3.76239	12.0678	0.476437
-165.8	-18.5	29.0394	10.8517	7.28101	18.9475	0.788147
-30	38.48	25.9495	9.40929	5.90774	15.8555	0.687146
110	-33.5	18.696	7.62022	2.49987	10.2842	0.333518
-158	22.75	26.7305	9.76137	6.31275	16.6745	0.721827
-42.65	-29.33	23.7774	8.54966	4.7205	13.6613	0.57512
-18.21	47.37	19.2141	7.63462	2.65602	10.4716	0.352442
-8.77	42.36	18.2687	7.62213	2.38588	10.1591	0.319281
168.7	-26.35	21.5778	7.93658	3.59556	11.807	0.458533
-57.29	-50.99	9.36864	9.51173	2.67656	12.2037	0.301094
-165.92	-18.43	28.1994	10.4537	6.98173	18.1665	0.771832
110	-38	14.3083	8.16673	1.97679	10.2073	0.251337
-8.36	43.37	17.6906	7.64414	2.25341	10.0323	0.302085
-18.98	8.82	30.6258	11.5625	7.60031	20.1548	0.785314
-158	22.75	27.1705	9.96596	6.52838	17.1319	0.739186
-158	22.75	29.1805	10.9177	7.32358	19.0708	0.789808
164.65	-19.22	30.1396	11.3537	7.54263	19.8313	0.791544
17.94	-34.94	15.5392	7.90724	1.98204	9.97446	0.259958
-28.94	29.18	25.8956	9.38566	5.87901	15.7991	0.6846
-178.98	-33.72	22.8903	8.26676	4.24691	12.8542	0.527199
-16.98	39.96	23.8552	8.57656	4.76282	13.7352	0.579321
-78.43	29.08	22.6251	8.19124	4.10977	12.6275	0.51301
-158	22.75	30.3905	11.4627	7.57731	20.0041	0.788976
-158	22.75	26.7305	9.76137	6.31275	16.6745	0.721827
-18.98	8.82	30.8158	11.641	7.61181	20.2679	0.781433
-78.13	28.68	23.2751	8.3839	4.44992	13.1957	0.547944
-158	22.75	26.7305	9.76137	6.31275	16.6745	0.721827
-132.65	-11.76	19.2385	7.63576	2.66387	10.4814	0.353379
-18.21	47.37	19.1941	7.63372	2.64963	10.4637	0.351679
-158	22.75	26.2705	9.55199	6.07708	16.1924	0.701932
-8.4	43.39	17.1006	7.68889	2.14433	9.95264	0.287065
-7.6	48.12	23.0102	8.30232	4.30972	12.9591	0.533649
-158	22.75	26.5405	9.67425	6.21653	16.4757	0.713809
-16.08	5.86	28.1233	10.4174	6.95112	18.0924	0.769854
-158	22.75	26.7205	9.75676	6.30772	16.6641	0.721412
-30	41.19	24.9834	9.00142	5.38299	14.853	0.63923
-14.3	-7.23	25.9066	9.39049	5.88491	15.8106	0.685123
-158	22.75	29.5505	11.0889	7.42324	19.3812	0.792524
-20	47.01	16.6773	7.73427	2.08236	9.92591	0.277898
174.27	-20.75	29.0212	10.8431	7.27534	18.9314	0.787909
-158	22.75	29.4905	11.0614	7.4083	19.3322	0.79225
-21.76	30.05	22.8601	8.25793	4.23117	12.828	0.525577
-165.88	-18.46	28.0594	10.387	6.92503	18.0298	0.768137
-30	41.19	24.9934	9.00546	5.38849	14.8632	0.639746
-31.27	43.6	24.8755	8.95819	5.3236	14.743	0.633634
-76.61	15.41	22.6369	8.1945	4.11581	12.6374	0.513638
-18.25	-10.9	25.9531	9.4109	5.90969	15.8593	0.687317
-169.13	-28.55	22.1363	8.06355	3.86382	12.2289	0.487213
-158	22.75	30.4005	11.467	7.57848	20.0108	0.788845
-79.28	10.57	22.4693	8.1489	4.03035	12.4976	0.504731
-16.98	39.96	23.8452	8.57308	4.75737	13.7257	0.578781
-146.93	-16.95	20.4139	7.73952	3.08934	11.0539	0.402669
-38.7	-27.32	18.7926	7.6215	2.52749	10.3161	0.336909
-79.3	30.23	23.017	8.30435	4.31327	12.9651	0.534013
-28.21	-3.92	29.9785	11.2824	7.51509	19.7141	0.792497
-20.66	12.75	24.5815	8.84306	5.16157	14.4463	0.618208
179	16	30.1329	11.3508	7.54157	19.8265	0.791594
-41.7	42.85	24.8457	8.94636	5.30721	14.7128	0.632084
-158	22.75	29.8605	11.2297	7.49243	19.6254	0.79286
-158	22.75	24.5105	8.81585	5.12243	14.3753	0.614448
110	-32	20.1473	7.70754	2.98479	10.9069	0.390794
-30	41.19	24.9834	9.00142	5.38299	14.853	0.63923
167.43	-24.27	20.8851	7.80812	3.28495	11.3374	0.424554
-158	22.75	29.8905	11.2431	7.49839	19.6481	0.792794
-30	36.78	26.101	9.47627	5.98811	16.0145	0.69421
-77.39	15.45	22.3709	8.12293	3.98064	12.4169	0.499524
-35.52	-19.91	26.093	9.47269	5.98386	16.006	0.693838
-158	22.75	29.8905	11.2431	7.49839	19.6481	0.792794
-171.8	-29.96	21.9651	8.02246	3.78007	12.0957	0.478321
-26.4	-0.19	30.8617	11.6598	7.61361	20.2941	0.780366
-8.36	43.37	17.4806	7.65754	2.21155	9.99821	0.296442
-34.76	-18.27	28.0133	10.365	6.90597	17.9844	0.766864
167.37	-24.2	21.3751	7.89563	3.50201	11.6633	0.448391
-78.98	29.8	23.2844	8.38684	4.45488	13.2041	0.548447
172.86	-32.85	22.4659	8.14799	4.02862	12.4948	0.50455
-35.52	-19.91	26.093	9.47269	5.98386	16.006	0.693838
-153.42	23.91	25.8341	9.35877	5.84608	15.7346	0.681671
-158	22.75	28.9805	10.824	7.26254	18.8953	0.787356
-21	21.95	28.4907	10.5923	7.09381	18.4455	0.778668
18.07	-34.89	15.5292	7.90907	1.98158	9.97563	0.259844
-34.76	-18.27	28.0333	10.3745	6.91425	18.0041	0.767419
-175.96	-32.17	22.0143	8.03407	3.804	12.1337	0.480867
110	-32	20.1473	7.70754	2.98479	10.9069	0.390794
-158	22.75	27.6905	10.2115	6.76763	17.6628	0.757219
-132.76	23.58	24.7113	8.89339	5.23311	14.5767	0.625047
-158	22.75	25.7905	9.33983	5.82272	15.689	0.679585
-29.61	66.65	9.05502	9.58482	2.73307	12.3317	0.30642
-14.84	-8.02	25.8264	9.35543	5.84196	15.7266	0.681304
-158	22.75	25.4305	9.18579	5.62792	15.3138	0.661953
-30	55.25	17.7995	7.63832	2.27644	10.0525	0.30514
170.3	-28.88	21.6696	7.95603	3.63863	11.8738	0.463177
-176.22	-32.3	22.9876	8.29553	4.29781	12.9392	0.532429
-158	22.75	29.5205	11.0751	7.41583	19.3568	0.792395
-34.76	-18.27	28.0133	10.365	6.90597	17.9844	0.766864
-41.48	42.85	25.3757	9.16277	5.59806	15.2569	0.659215
-22.28	9.05	29.8764	11.2368	7.4956	19.6374	0.792827
172.86	-32.83	22.4059	8.13211	3.99829	12.4455	0.501375
-20	20.41	24.149	8.68114	4.92355	14.0186	0.595148
-174.92	-31.62	22.6088	8.18674	4.10142	12.6138	0.512142
-8.77	48.95	14.7398	8.06826	1.96707	10.1061	0.253123
-158	22.75	27.8405	10.2828	6.83298	17.8131	0.761858
-75.35	34.73	22.6347	8.1939	4.11469	12.6355	0.513522
-74.03	20.42	22.5605	8.17349	4.07671	12.5733	0.50957
-158	22.75	29.8005	11.2026	7.48011	19.5793	0.792939
-74.71	18.8	22.5033	8.15801	4.0476	12.5257	0.506533
-74.02	20.12	22.3704	8.1228	3.9804	12.4165	0.499498
-158	22.75	29.6305	11.1255	7.44239	19.4457	0.792785
-54.73	-43.43	13.2398	8.4386	2.04953	10.5369	0.252277
-8.44	43.42	15.3578	7.94114	1.97475	9.99762	0.257997
-17.51	36.61	19.0829	7.62923	2.61465	10.4205	0.347483
-28.48	5.92	31.9363	12.0604	7.53647	20.7558	0.740081
-158	22.75	29.3205	10.9828	7.36337	19.1905	0.79112
-155.15	-20.75	19.7332	7.66769	2.83157	10.6984	0.373131
-57.29	-50.99	9.36864	9.51173	2.67656	12.2037	0.301094
-74.65	22.83	22.5121	8.16037	4.05205	12.533	0.506998
-158	22.75	28.7905	10.7344	7.20022	18.7239	0.784425
-25.99	-28.79	22.5239	8.16356	4.05807	12.5428	0.507626
-144.41	26.15	24.7431	8.90585	5.25065	14.6088	0.626717
-8.77	48.95	14.7398	8.06826	1.96707	10.1061	0.253123
-8.1	48.75	13.0435	8.49204	2.06973	10.6081	0.253224
-158	22.75	27.6905	10.2115	6.76763	17.6628	0.757219
-158	22.75	29.8805	11.2386	7.49641	19.6406	0.792818
-27.34	-2.02	29.3059	10.976	7.35933	19.1781	0.790999
-175.07	-31.7	22.3708	8.1229	3.98059	12.4168	0.499518
-18.98	8.82	30.7958	11.6329	7.6109	20.2564	0.781881
-8.44	43.42	15.3578	7.94114	1.97475	9.99762	0.257997
-152.66	-19.32	19.8989	7.6822	2.89152	10.7789	0.380081
-49.59	-35.71	17.3342	7.66854	2.18437	9.97822	0.292704
-8.5	43.45	19.4978	7.65038	2.74966	10.5908	0.363545
177	-30	25.112	9.05361	5.45367	14.9848	0.645846
-57.29	-50.99	9.31864	9.52369	2.68568	12.2245	0.301946
-8.77	48.95	14.7198	8.07265	1.96725	10.1104	0.253011
-158	22.75	25.9605	9.41414	5.91362	15.8671	0.687665
-21.79	26.54	24.1887	8.69559	4.94531	14.0573	0.597275
-35.95	-30.9	19.24	7.63583	2.66434	10.482	0.353436
-29.94	65.88	6.55939	9.92615	3.0395	12.971	0.339663
-46.19	-32.61	22.0065	8.03221	3.80017	12.1276	0.48046
-151.02	-18.35	20.0366	7.69572	2.94273	10.8488	0.385977
-158	22.75	25.4605	9.19844	5.64425	15.3449	0.663447
-153	-19.5	19.6689	7.66258	2.80882	10.6682	0.370479
-34	25.8	29.1523	10.9045	7.31528	19.0464	0.789503
-123.78	29.61	20.4676	7.74657	3.11097	11.0847	0.405109
-21.57	-13.67	24.7759	8.91874	5.26872	14.642	0.628435
-158	22.75	26.5505	9.67881	6.22164	16.4862	0.714238
168.75	-26.43	21.5678	7.93449	3.59089	11.7998	0.458029
-16.98	39.96	22.6052	8.18574	4.09955	12.6107	0.511948
-127.81	26.55	23.374	8.41539	4.50272	13.2856	0.55329
-42.65	-29.33	23.6974	8.52231	4.67705	13.5857	0.570794
-46.19	-32.61	22.0765	8.04897	3.8344	12.182	0.484095
-27.34	-2.02	29.4959	11.0638	7.40966	19.3366	0.792277
-41.35	-29.31	17.916	7.63294	2.30207	10.0759	0.308504
-154.23	-20.22	19.6269	7.65939	2.7941	10.6488	0.368759
-158	22.75	29.8005	11.2026	7.48011	19.5793	0.792939
-178	-15	30.3952	11.4647	7.57786	20.0072	0.788915
-20.42	35.67	19.9115	7.68339	2.89615	10.7852	0.380616
-16.93	5.1	30.3429	11.4423	7.57152	19.9723	0.789567
-35.95	-30.9	23.63	8.49955	4.64054	13.5225	0.567147
-25.78	1.29	29.608	11.1152	7.43709	19.4277	0.792724
-158	22.75	30.4005	11.467	7.57848	20.0108	0.788845
172.13	-31.73	22.3739	8.12372	3.98217	12.4194	0.499684
-30.95	-10.03	29.3111	10.9785	7.36078	19.1826	0.791043
-10.64	47.96	17.5738	7.65124	2.22972	10.0125	0.298907
-17.45	-10.23	26.162	9.50339	6.02021	16.0784	0.697008
-54.73	-43.43	11.3098	8.9866	2.31924	11.3344	0.27024
-30	50.84	19.3915	7.64381	2.71389	10.5447	0.359323
-179.8	-34.13	22.7008	8.21236	4.14867	12.6915	0.51705
-77.68	28.03	23.022	8.30586	4.31591	12.9695	0.534284
-158	22.75	28.8005	10.7392	7.2036	18.7331	0.784593
-158	22.75	29.9805	11.2833	7.51546	19.7156	0.792488
-158	22.75	29.1405	10.899	7.31176	19.0361	0.789371
-158	22.75	27.2905	10.0223	6.58522	17.2555	0.743601
-158	22.75	25.7805	9.33549	5.81735	15.6786	0.679105
-29.94	65.88	6.30939	9.92812	3.04665	12.9795	0.341175
-27.34	-2.02	29.4159	11.027	7.38904	19.2705	0.791818
-74.61	23.61	22.6108	8.18728	4.10241	12.6154	0.512246
-19.87	28.68	23.7311	8.53378	4.69532	13.6175	0.572614
-144.41	26.15	24.8531	8.94929	5.31127	14.7203	0.632468
-21.18	22.96	27.7616	10.2453	6.79883	17.7342	0.759452
179.4	4.66	31.6829	11.9731	7.57646	20.6747	0.752366
-74.46	21.5	22.3538	8.1185	3.97208	12.403	0.498625
-170.5	-29.28	22.0371	8.0395	3.81511	12.1513	0.482048
-42.37	-30.09	18.4801	7.61964	2.44057	10.2176	0.326165
47.48	-11.6	28.4517	10.5738	7.0793	18.4086	0.777822
-16.93	5.1	30.3029	11.425	7.56637	19.9452	0.790025
-21.57	-13.67	25.1359	9.06339	5.46679	15.0093	0.64707
173.73	-34.13	22.3059	8.10614	3.94807	12.3642	0.496102
-34.8	43.42	24.892	8.96478	5.33269	14.7598	0.634493
-14.89	1.35	25.9463	9.40788	5.90604	15.8522	0.686995
-79.45	10.25	22.6147	8.18836	4.10443	12.6187	0.512455
-123.78	29.61	20.4676	7.74657	3.11097	11.0847	0.405109
-29.76	-7.48	30.3297	11.4365	7.56984	19.9633	0.789723
-150.15	-17.85	20.1443	7.70722	2.98366	10.9054	0.390664
-8.92	42.15	16.9915	7.69955	2.12706	9.94335	0.284573
-42.65	-29.33	23.7274	8.53253	4.69333	13.614	0.572416
-75.35	17.65	22.6057	8.18589	4.09983	12.6112	0.511977
-158	22.75	25.2105	9.09406	5.50771	15.0862	0.650874
-8.4	43.39	19.6406	7.66042	2.79889	10.6551	0.369319
179	11	31.9961	12.0803	7.52492	20.7723	0.736911
169.75	-28.03	21.3917	7.89888	3.50958	11.6749	0.449215
-19.49	9.71	27.667	10.2003	6.75721	17.639	0.756466
-158	22.75	28.8205	10.7486	7.21033	18.7513	0.784926
-21.18	22.96	27.7716	10.25	6.80319	17.7443	0.759761
-30.95	-10.03	29.3011	10.9738	7.35801	19.1741	0.790959
-144.41	26.15	24.7831	8.92159	5.2727	14.6493	0.628813
-25.03	44.22	24.1117	8.66763	4.90311	13.9823	0.593146
-8.77	42.36	15.7887	7.86334	1.99591	9.94932	0.263056
-21.79	26.54	24.1687	8.68829	4.93433	14.0378	0.596202
-153.58	-19.85	19.6911	7.66432	2.81666	10.6786	0.371394
-173.17	-30.7	22.0934	8.05306	3.84268	12.1952	0.484974
-46.19	-32.61	22.0665	8.04656	3.8295	12.1742	0.483575
-127.81	26.55	22.604	8.18541	4.09894	12.6097	0.511884
-19.87	28.68	15.3711	7.9386	1.97521	9.99579	0.258132
-123.78	29.61	20.4676	7.74657	3.11097	11.0847	0.405109
-8.83	42.22	18.0887	7.62662	2.34193	10.1144	0.313669
-177.61	-33	22.7846	8.23613	4.19194	12.763	0.521528
-8.36	43.37	21.1306	7.8499	3.39199	11.4967	0.436365
-29.01	36.16	20.626	7.7685	3.17573	11.1778	0.412385
-158	22.75	26.2705	9.55199	6.07708	16.1924	0.701932
-46.6	-33.15	17.3695	7.66576	2.19077	9.98276	0.29359
-8.86	42.22	17.5087	7.65558	2.21697	10.0024	0.297179
-162.56	-24.95	20.6831	7.77683	3.19946	11.2122	0.41504
-21.26	30.91	21.7758	7.97923	3.68895	11.9523	0.468584
-165.25	-26.43	20.9339	7.81609	3.30595	11.3684	0.42688
-17.45	-10.23	26.012	9.43681	5.94096	15.921	0.690075
-158	22.75	26.8705	9.82607	6.38251	16.8206	0.727541
-12.45	46.08	23.3008	8.39203	4.46363	13.219	0.549334
-42.91	-29.85	20.0801	7.70026	2.95916	10.8714	0.387861
-144.41	26.15	24.8531	8.94929	5.31127	14.7203	0.632468
169	-26.83	21.1235	7.84865	3.38888	11.4921	0.436023
-78.68	29.42	22.9536	8.28541	4.28	12.9094	0.5306
110	-18.4	22.4816	8.15218	4.03656	12.5077	0.50538
-8.37	43.36	20.6606	7.77351	3.19006	11.1985	0.413989
-158	22.75	26.9505	9.86321	6.42191	16.9039	0.730728
-8.36	43.37	17.8006	7.63826	2.27667	10.0527	0.30517
-158	22.75	29.9705	11.2789	7.51363	19.7082	0.79253
-158	22.75	29.0005	10.8334	7.26886	18.913	0.787631
-8.44	43.42	17.1578	7.68359	2.15376	9.95819	0.288409
-78.85	11.33	22.7248	8.21912	4.16104	12.7119	0.518331
-17.05	32.43	18.8882	7.62341	2.55552	10.3491	0.340329
-74.02	20.07	22.4504	8.14386	4.02076	12.482	0.503727
-131.85	24.13	24.2497	8.71802	4.97886	14.1171	0.600548
-21.97	27.25	26.751	9.77082	6.32303	16.696	0.722675
170.5	-29.2	21.7691	7.97776	3.6858	11.9474	0.468246
18.01	-33.62	12.4063	8.6705	2.14791	10.8575	0.257789
-177.23	-32.81	22.569	8.17581	4.08105	12.5804	0.510022
-131.85	24.13	24.2497	8.71802	4.97886	14.1171	0.600548
-123.78	29.61	20.4776	7.7479	3.11501	11.0904	0.405565
-163	-18.41	29.0886	10.8747	7.29611	18.9907	0.788763
-135.41	-12.72	21.3239	7.88571	3.47868	11.6278	0.44585
-102.35	17.68	19.3023	7.63892	2.68451	10.5074	0.355837
-158	22.75	28.4805	10.5875	7.09004	18.4359	0.778449
-24.02	5.17	31.9354	12.0601	7.53663	20.7556	0.740125
-131.85	24.13	24.2497	8.71802	4.97886	14.1171	0.600548
-35.52	-19.91	26.083	9.46825	5.97857	15.9955	0.693376
179	11	31.9961	12.0803	7.52492	20.7723	0.736911
-23.22	44.46	24.037	8.64075	4.86215	13.9098	0.589126
-127.81	26.55	22.574	8.17718	4.0836	12.5845	0.510287
-38.7	-27.32	20.2226	7.71607	3.01386	10.9474	0.394109
-23.12	44.37	23.8005	8.55759	4.73302	13.6831	0.576364
-75.53	25.07	22.4515	8.14415	4.02132	12.4829	0.503786
-158	22.75	26.6905	9.74296	6.29263	16.6327	0.720163
-134.89	24.27	24.5948	8.84819	5.16891	14.4596	0.618912
-131.85	24.13	24.2397	8.71433	4.97337	14.1073	0.600013
-158	22.75	27.3605	10.0553	6.61794	17.3274	0.746108
-49.89	34.1	21.7749	7.97905	3.68856	11.9517	0.468542
-35.15	-24.6	22.5721	8.17667	4.08264	12.583	0.510188
-31.46	-11.24	30.0452	11.3121	7.52698	19.7632	0.792167
-54.02	41.83	25.0196	9.01604	5.4029	14.89	0.641098
-29.12	-5.92	29.9066	11.2503	7.50152	19.6603	0.792751
-29.27	-6.48	28.3562	10.5283	7.0431	18.3177	0.775659
-155.55	-20.96	19.5532	7.6541	2.76858	10.6154	0.365768
-74.46	21.5	22.5138	8.16084	4.05294	12.5344	0.50709
-29.12	-5.92	29.9466	11.2682	7.50917	19.6903	0.792622
-24.08	-15.75	24.607	8.85287	5.17561	14.4718	0.619554
-8.36	43.37	21.1906	7.86074	3.41868	11.5369	0.439292
-158	22.75	26.0805	9.46716	5.97727	15.993	0.693262
-19.24	12.79	18.6894	7.62015	2.498	10.282	0.333288
-20.66	12.75	30.5815	11.5439	7.59671	20.1273	0.786098
-21.76	30.05	23.1901	8.35725	4.40469	13.119	0.543348
-30	45.36	22.8067	8.24249	4.20342	12.782	0.522715
-35.95	-30.9	18.67	7.61998	2.49255	10.2758	0.332616
-21.26	30.91	21.7958	7.98368	3.69849	11.9673	0.469607
-165.88	-18.46	29.8694	11.2336	7.4942	19.6321	0.792842
177	-30	25.462	9.19907	5.64506	15.3464	0.663521
-143.38	-15.78	20.7701	7.78996	3.23596	11.2654	0.419112
-159.32	-23.12	20.1746	7.7106	2.99532	10.9216	0.391996
-153.78	-19.96	19.8064	7.67387	2.85784	10.7335	0.376183
-158	22.75	26.3005	9.56548	6.09272	16.2239	0.703278
-32.86	-14.11	28.1518	10.431	6.96266	18.1202	0.770605
-132.76	23.58	24.5913	8.84682	5.16695	14.456	0.618725
-158	22.75	28.1205	10.4161	6.95	18.0897	0.769782
-30	46.74	23.1305	8.33883	4.3731	13.0657	0.54013
-160	-18.27	29.283	10.9654	7.35295	19.1587	0.790802
-74.33	21.17	22.442	8.14162	4.0165	12.4751	0.503282
-34.84	-31.37	17.541	7.65339	2.22326	10.0074	0.298033
-158	22.75	29.8905	11.2431	7.49839	19.6481	0.792794
-27.45	-2.39	28.0488	10.3819	6.92067	18.0194	0.767847
-20	24.51	30.4161	11.4737	7.58027	20.0211	0.788637
-18.98	8.82	23.6958	8.52175	4.67615	13.5842	0.570704
-158	22.75	26.8705	9.82607	6.38251	16.8206	0.727541
-161.1	-24.13	20.4652	7.74625	3.11	11.0833	0.405001
-46.6	-33.15	17.3995	7.66346	2.19629	9.98675	0.294351
-158	22.75	27.0105	9.89115	6.45122	16.9663	0.73308
-158	22.75	25.9405	9.40535	5.90297	15.8461	0.686723
-29.12	-5.92	29.8766	11.2369	7.49564	19.6376	0.792827
-74.65	22.7	22.3621	8.12064	3.97623	12.4097	0.49906
-20.42	35.67	19.9015	7.68245	2.89247	10.7802	0.380191
-74.65	22.46	22.6021	8.18488	4.09796	12.6081	0.511782
-132.76	23.58	24.5913	8.84682	5.16695	14.456	0.618725
-77.32	27.55	23.2674	8.38146	4.4458	13.1887	0.547526
-19.87	28.68	26.2411	9.53879	6.06171	16.1615	0.700606
-158	22.75	29.3605	11.0014	7.37429	19.2242	0.791432
-132.76	23.58	24.5913	8.84682	5.16695	14.456	0.618725
-32.86	-14.11	28.1518	10.431	6.96266	18.1202	0.770605
-74.73	18.74	22.8533	8.25597	4.22765	12.8222	0.525214
-39.6	-26.62	20.9558	7.81972	3.3154	11.3824	0.427926
-158	22.75	24.9205	8.97617	5.34838	14.7889	0.635973
-17.44	5.98	30.3391	11.4406	7.57105	19.9697	0.789612
-158	22.75	25.1105	9.053	5.45286	14.9833	0.645771
-158	22.75	26.8105	9.79829	6.35273	16.7581	0.725113
-158	22.75	27.4605	10.1025	6.66412	17.4296	0.749601
-158	22.75	25.8705	9.37468	5.8656	15.7728	0.683409
-170.08	-29.07	22.216	8.08334	3.90328	12.2921	0.491383
-170.9	-29.5	22.3886	8.12756	3.98956	12.4313	0.500459
-163.81	-25.65	20.7156	7.78167	3.21304	11.2319	0.416557
-171.05	-29.56	21.9586	8.02092	3.77688	12.0907	0.477981
-77.18	27.35	23.0802	8.32348	4.34658	13.021	0.537422
-20.78	-13.03	25.6701	9.28779	5.75788	15.5632	0.673763
-158	22.75	27.3105	10.0317	6.5946	17.2761	0.744323
-8.77	48.95	13.8398	8.28154	2.00055	10.339	0.25084
-158	22.75	26.8005	9.79367	6.34775	16.7476	0.724705
-2.63	-5.86	24.0531	8.64649	4.87094	13.9254	0.58999
-158	22.75	23.9205	8.59942	4.79845	13.7977	0.582847
-31.52	-21.74	23.2792	8.38517	4.45206	13.1993	0.548162
-75.27	24.68	22.6897	8.20924	4.14295	12.682	0.516456
-14.89	1.35	26.1263	9.48749	6.00143	16.041	0.695373
-161.64	-24.43	20.7467	7.78638	3.22612	11.251	0.418014
-165.92	-18.43	29.7594	11.1841	7.47136	19.5474	0.792953
-54.4	-43.48	14.5785	8.1042	1.96929	10.1416	0.252303
-43.33	42.71	25.3076	9.13431	5.56086	15.1864	0.65579
-158	22.75	26.0805	9.46716	5.97727	15.993	0.693262
-158	22.75	28.5705	10.6302	7.12307	18.5205	0.780331
-8.36	43.37	17.6106	7.64891	2.23707	10.0185	0.299897
-8.44	43.42	14.4578	8.13177	1.97207	10.17	0.251809
-30	45.36	23.0567	8.31633	4.33417	13.0002	0.536153
-20.42	35.67	18.6715	7.61999	2.49296	10.2763	0.332666
-30	49.44	20.389	7.73632	3.07938	11.0397	0.401544
-55	-43.58	10.5498	9.20258	2.45602	11.6813	0.28145
-36.63	-22.15	26.8951	9.83748	6.39466	16.8463	0.728527
-21.19	31.57	26.6934	9.74426	6.29406	16.6357	0.720282
-8.89	42.17	16.7015	7.73139	2.08553	9.92676	0.278384
-8.5	43.45	19.3878	7.64361	2.71269	10.5432	0.35918
-28.24	-19.13	24.6398	8.86557	5.19371	14.5047	0.621286
-33.31	-15.17	29.7202	11.1663	7.46281	19.5168	0.792935
-30	45.36	22.8767	8.26278	4.23983	12.8424	0.52647
-8.77	48.95	14.2198	8.18783	1.98025	10.2305	0.25113
-14.05	43.92	23.1275	8.33792	4.37154	13.063	0.53997
-27.45	-2.39	28.0388	10.3771	6.91654	18.0096	0.767572
-28.24	-19.13	24.3598	8.75891	5.03942	14.2256	0.606432
-45.79	-26.72	26.4945	9.6533	6.193	16.4275	0.711826
-158	22.75	25.3505	9.15221	5.58429	15.2308	0.657949
-55.94	-47.62	9.40315	9.5034	2.67023	12.1892	0.300506
-75.7	25.3	22.8215	8.24675	4.2111	12.7947	0.523508
-165.8	-18.5	29.7494	11.1795	7.4692	19.5396	0.792951
-15.35	2.16	26.9308	9.85404	6.41222	16.8834	0.729947
-158	22.75	28.5705	10.6302	7.12307	18.5205	0.780331
-158	22.75	29.3705	11.006	7.37698	19.2326	0.791506
-102.35	17.68	24.0923	8.66059	4.89242	13.9634	0.592098
-158	22.75	26.7905	9.78904	6.34277	16.7372	0.724296
-165.8	-18.5	29.7494	11.1795	7.4692	19.5396	0.792951
-165.8	-18.5	29.7494	11.1795	7.4692	19.5396	0.792951
-21.76	30.05	23.4301	8.43351	4.53279	13.337	0.556325
-76.45	26.33	22.9557	8.28605	4.28111	12.9113	0.530715
-20.78	-13.03	25.2701	9.11871	5.54034	15.1476	0.653895
-77.88	28.33	22.832	8.24979	4.21657	12.8038	0.524072
-172.17	-30.17	21.9851	8.02717	3.78979	12.1111	0.479356
-21.76	30.05	23.4601	8.44327	4.5489	13.3646	0.557949
-29.61	66.65	9.33502	9.51978	2.6827	12.2177	0.301667
-76.93	27.02	22.9902	8.29633	4.29922	12.9416	0.532573
-39.6	-26.62	21.0458	7.835	3.35463	11.4408	0.432254
110	-11.5	26.6189	9.7101	6.25644	16.5578	0.717153
-161.37	-24.27	20.5252	7.75434	3.13435	11.1181	0.407741
-158	22.75	27.3805	10.0647	6.62723	17.3479	0.746815
-74.12	21.81	22.6938	8.21039	4.14506	12.6855	0.516675
-162.53	-24.93	20.5031	7.75133	3.12535	11.1053	0.40673
-21.78	26.22	26.8598	9.82108	6.37718	16.8094	0.727107
-158	22.75	26.3005	9.56548	6.09272	16.2239	0.703278
-158	22.75	29.3805	11.0106	7.37966	19.241	0.791578
-158	22.75	26.6005	9.70167	6.2471	16.5385	0.716372
174.14	-34.74	22.6101	8.1871	4.10209	12.6149	0.512212
-163	-18.41	29.5586	11.0926	7.4252	19.3877	0.792555
-16.93	5.1	30.3129	11.4293	7.56768	19.952	0.789914
-158	22.75	27.2905	10.0223	6.58522	17.2555	0.743601
-35.95	-30.9	24.02	8.63468	4.85285	13.8934	0.588211
-160	-18.27	29.293	10.9701	7.35574	19.1672	0.790889
-8.44	43.42	15.2578	7.96051	1.97173	10.0121	0.25702
-165.92	-18.43	29.9194	11.256	7.504	19.6699	0.792713
-158	22.75	26.6405	9.72	6.26738	16.5804	0.718065
-140.92	-14.71	20.9106	7.81226	3.2959	11.3536	0.425768
-158	22.75	25.4305	9.18579	5.62792	15.3138	0.661953
-165.92	-18.43	29.7894	11.1976	7.47777	19.5707	0.792946
-158	22.75	25.8805	9.37905	5.87094	15.7833	0.683884
-158	22.75	27.1905	9.97534	6.53791	17.1526	0.739932
-158	22.75	26.6405	9.72	6.26738	16.5804	0.718065
-163	-18.41	29.5486	11.088	7.42276	19.3796	0.792516
-34.13	-23.8	23.445	8.43835	4.54077	13.3507	0.557131
-158	22.75	27.3005	10.027	6.58991	17.2658	0.743962
-36.96	-22.92	22.8643	8.25915	4.23334	12.8317	0.525801
-29.27	-6.48	28.3362	10.5188	7.03541	18.2985	0.77519
177.35	-35.56	22.7746	8.23328	4.18679	12.7544	0.520996
-21.19	31.57	26.3534	9.5893	6.12018	16.2794	0.705633
-163	-18.41	29.6286	11.1246	7.44193	19.4441	0.79278
-160	-18.27	29.293	10.9701	7.35574	19.1672	0.790889
-32.93	43.51	24.6984	8.88836	5.226	14.5637	0.62437
-36.63	-22.15	26.9051	9.84212	6.39959	16.8567	0.728926
-36.63	-22.15	26.9551	9.86536	6.42417	16.9087	0.73091
-64.25	31.7	23.5583	8.47558	4.60176	13.4555	0.563263
-58.06	-47.21	7.96989	9.79426	2.90688	12.7104	0.323766
-165.88	-18.46	29.8794	11.2381	7.49619	19.6397	0.79282
-19.99	42.9	21.3608	7.89284	3.49547	11.6533	0.447679
-31.46	-11.24	29.9952	11.2899	7.51813	19.7264	0.792422
-158	22.75	27.2205	9.98942	6.55217	17.1835	0.741043
-10.64	47.96	20.6338	7.76962	3.17895	11.1824	0.412746
-35.15	-24.6	22.2721	8.0975	3.93119	12.337	0.494325
-70.03	39.23	16.6953	7.73213	2.08472	9.92653	0.278259
171.17	-30.23	21.8837	8.00357	3.74066	12.0335	0.474118
-165.88	-18.46	29.8794	11.2381	7.49619	19.6397	0.79282
-158	22.75	27.2105	9.98473	6.54742	17.1732	0.740674
-158	22.75	29.3705	11.006	7.37698	19.2326	0.791506
-18.21	47.37	17.2141	7.67857	2.16327	9.9641	0.289753
-36.08	-30.08	23.0937	8.32757	4.35366	13.0329	0.538146
-21.97	27.25	26.751	9.77082	6.32303	16.696	0.722675
-8.44	43.42	17.7578	7.64045	2.26752	10.0445	0.303961
-156.07	-21.28	19.6622	7.66206	2.80646	10.6651	0.370204
-158	22.75	28.5805	10.635	7.12669	18.5299	0.780533
-158	22.75	26.1305	9.48938	6.00366	16.0454	0.695567
-154.78	-20.53	19.6233	7.65913	2.79285	10.6472	0.368612
-127.81	26.55	22.574	8.17718	4.0836	12.5845	0.510287
-158	22.75	28.5205	10.6065	7.10482	18.4736	0.7793
-139.21	-8.99	27.317	10.0348	6.59764	17.2828	0.744556
-50.56	42.12	24.3268	8.74659	5.02127	14.193	0.604672
-31.52	-21.74	23.4092	8.42673	4.52156	13.3178	0.555193
-157.4	-22.03	19.6935	7.6645	2.8175	10.6797	0.371491
-21.4	24.68	27.3897	10.0691	6.6315	17.3573	0.74714
-24.91	-16.43	24.9085	8.97136	5.34176	14.7766	0.635348
-39.19	-26.1	25.5457	9.23456	5.69054	15.4335	0.667666
-158	22.75	25.5405	9.23235	5.68773	15.4281	0.667411
-45.28	-25.77	26.5252	9.66729	6.20873	16.4597	0.713152
-158	22.75	26.6605	9.72917	6.2775	16.6013	0.718907
-71.3	34.68	21.4725	7.91496	3.54669	11.7317	0.453244
-20.01	38.17	24.9046	8.96979	5.33961	14.7726	0.635145
-160	-18.27	29.243	10.9468	7.34164	19.1245	0.790435
-158	22.75	27.0705	9.91915	6.48033	17.0285	0.735399
-159.78	-23.4	20.3046	7.72582	3.04596	10.9925	0.397758
-36.96	-22.92	22.8843	8.26499	4.24377	12.849	0.526875
-158	22.75	25.6405	9.27508	5.74189	15.5323	0.67232
-68.07	40.51	23.0059	8.30104	4.30747	12.9554	0.533419
-158	22.75	25.2105	9.09406	5.50771	15.0862	0.650874
-158	22.75	29.3605	11.0014	7.37429	19.2242	0.791432
-158	22.75	29.4205	11.0291	7.39026	19.2744	0.791847
-167.33	-27.56	21.8012	7.98489	3.70108	11.9713	0.469884
-8.44	43.42	19.7378	7.66808	2.83324	10.7006	0.373325
-34.13	-23.8	23.585	8.48447	4.61618	13.4804	0.564708
-158	22.75	29.8405	11.2207	7.48838	19.6101	0.792894
-36.26	-30.94	24.28	8.72921	4.99552	14.1469	0.60217
-66.28	40.46	23.0601	8.31736	4.33595	13.0032	0.536335
-158	22.75	28.2205	10.4637	6.99013	18.187	0.772367
-158	22.75	28.0905	10.4018	6.93779	18.0603	0.76898
-102.35	17.68	28.0523	10.3836	6.9221	18.0228	0.767942
-39.19	-26.1	25.4957	9.21333	5.66338	15.3815	0.665194
-36.96	-22.92	23.0243	8.30653	4.31709	12.9715	0.534404
-158	22.75	28.5205	10.6065	7.10482	18.4736	0.7793
-158	22.75	28.0105	10.3637	6.90483	17.9817	0.766787
-21.4	24.68	27.9397	10.33	6.87521	17.9118	0.764779
-156.86	-21.73	19.7602	7.66993	2.84121	10.7113	0.374252
-21.4	24.68	27.9197	10.3205	6.86676	17.892	0.7642
-163.06	-25.22	21.0323	7.83268	3.34873	11.432	0.431605
-168.53	-28.22	21.9886	8.02799	3.79148	12.1138	0.479536
-8.37	43.36	21.1106	7.84634	3.38314	11.4835	0.435392
-8.36	43.37	21.2806	7.87746	3.45908	11.598	0.443711
-111.78	-25.83	26.2612	9.54782	6.07223	16.1827	0.701514
-8.37	43.36	17.4706	7.65825	2.20965	9.99674	0.296182
-30	46.74	20.6005	7.76484	3.16518	11.1625	0.411203
-101.16	-29.72	24.72	8.89681	5.23792	14.5855	0.625506
-24.08	-15.75	24.627	8.8606	5.18663	14.4919	0.62061
-158	22.75	26.2605	9.5475	6.07186	16.1819	0.701482
-158	22.75	28.4105	10.5542	7.06379	18.3695	0.776905
-57.66	41.53	24.2307	8.71101	4.96841	14.0985	0.599529
-27.41	-18.46	25.1886	9.08504	5.49572	15.0636	0.649761
-19.99	42.9	21.7108	7.96495	3.6581	11.9041	0.465272
-158	22.75	25.6905	9.29658	5.76889	15.5845	0.674755
-158	22.75	25.8305	9.35723	5.84418	15.7309	0.681502
-10.63	46.86	23.0724	8.3211	4.34245	13.0141	0.537
-158	22.75	25.1505	9.06938	5.47481	15.0244	0.647817
-158	22.75	28.5505	10.6207	7.1158	18.5018	0.779923
-158	22.75	25.9605	9.41414	5.91362	15.8671	0.687665
-158	22.75	25.7505	9.32249	5.80122	15.6472	0.67766
-37.76	-26.61	21.0927	7.84319	3.37526	11.4716	0.434526
-30	61.91	15.0329	8.00581	1.96746	10.0491	0.255089
-155.23	-20.8	19.7132	7.66607	2.82446	10.689	0.372303
-15.91	44.93	23.7502	8.54031	4.70569	13.6355	0.573647
-158	22.75	25.1605	9.07348	5.4803	15.0347	0.648327
-158	22.75	25.1705	9.07759	5.48578	15.0449	0.648837
-158	22.75	23.9805	8.62061	4.83124	13.8553	0.586083
19.39	39.39	22.5848	8.18015	4.08915	12.5936	0.510865
-10.64	47.96	20.6738	7.77545	3.19557	11.2065	0.414605
-158	22.75	26.0905	9.4716	5.98256	16.0035	0.693725
-158	22.75	25.9805	9.42295	5.92426	15.8881	0.688604
-8.93	47.56	23.0955	8.32811	4.3546	13.0345	0.538242
-40.71	-27.62	24.7551	8.91057	5.25727	14.621	0.627347
-30	42.7	19.4288	7.64603	2.72636	10.5607	0.360797
-41.35	42.88	25.2257	9.10034	5.51605	15.1019	0.651647
-30.88	63.33	13.6443	8.33159	2.01431	10.4	0.251059
-20.01	38.17	24.9046	8.96979	5.33961	14.7726	0.635145
-37.76	-26.61	22.2327	8.08753	3.91156	12.3054	0.492256
-158	22.75	28.3305	10.5161	7.0332	18.293	0.775055
-21.19	31.57	26.6834	9.73967	6.28903	16.6252	0.719864
-158	22.75	28.0105	10.3637	6.90483	17.9817	0.766787
-35.05	-18.86	25.1625	9.0743	5.4814	15.0367	0.64843
-8.44	43.42	19.9878	7.69078	2.92445	10.8238	0.383877
-30	45.36	22.6467	8.19722	4.12083	12.6456	0.514161
-27.45	-2.39	28.0588	10.3867	6.92478	18.0292	0.76812
-17.71	44.78	23.8095	8.56072	4.73795	13.6917	0.576854
47.51	-11.81	28.211	10.4592	6.98635	18.1778	0.772127
-158	22.75	25.3105	9.13551	5.56244	15.1894	0.655936
-158	22.75	26.3005	9.56548	6.09272	16.2239	0.703278
-19.99	42.9	21.9908	8.0285	3.79254	12.1155	0.479649
-158	22.75	25.6905	9.29658	5.76889	15.5845	0.674755
-158	22.75	24.0905	8.65996	4.89146	13.9617	0.592005
-158	22.75	25.3705	9.16058	5.5952	15.2515	0.658953
-59.08	41.42	24.1874	8.69512	4.9446	14.056	0.597207
-57.89	-51.93	7.87484	9.80874	2.9198	12.7375	0.325138
-39.19	-26.1	25.4857	9.20909	5.65795	15.3711	0.664698
-31.24	-10.78	27.7502	10.2398	6.79386	17.7228	0.759098
-40.71	-27.62	24.7451	8.90665	5.25176	14.6109	0.626823
32.89	33.92	25.5932	9.25482	5.71629	15.483	0.670004
-102.35	17.68	20.2523	7.71955	3.02542	10.9636	0.395425
-158	22.75	28.3605	10.5304	7.04474	18.3218	0.775759
-158	22.75	25.2305	9.10232	5.51866	15.1068	0.651889
-158	22.75	24.8505	8.94826	5.30984	14.7176	0.632333
-11.8	46.37	23.1312	8.33907	4.37351	13.0664	0.540172
-57.89	-51.93	7.83484	9.81462	2.9251	12.7485	0.325706
-158	22.75	29.7605	11.1846	7.4716	19.5483	0.792953
-32.81	43.58	25.4684	9.20176	5.64852	15.3531	0.663837
-158	22.75	24.8505	8.94826	5.30984	14.7176	0.632333
-53.37	41.88	24.6403	8.86577	5.19399	14.5053	0.621313
-158	22.75	25.3805	9.16477	5.60066	15.2619	0.659454
-158	22.75	25.1005	9.04892	5.44737	14.973	0.645258
-31.24	-10.78	27.7402	10.2351	6.78949	17.7128	0.758786
-28.03	43.95	24.9452	8.98607	5.36198	14.814	0.637254
-158	22.75	27.2905	10.0223	6.58522	17.2555	0.743601
-57.89	-51.93	7.87484	9.80874	2.9198	12.7375	0.325138
-158	22.75	25.2305	9.10232	5.51866	15.1068	0.651889
-158	22.75	26.1505	9.49829	6.01419	16.0664	0.696485
-158	22.75	24.5205	8.81966	5.12794	14.3852	0.614979
-158	22.75	25.7305	9.31384	5.79045	15.6263	0.676694
-158	22.75	25.1305	9.06118	5.46383	15.0038	0.646794
-30.88	63.33	13.5343	8.36025	2.02301	10.4359	0.25129
-21.78	26.22	26.6998	9.74721	6.29729	16.6424	0.720549
-42.73	42.78	25.2576	9.11354	5.53351	15.1348	0.653264
-158	22.75	25.9505	9.40975	5.9083	15.8566	0.687194
-39.76	43	25.3415	9.14846	5.57939	15.2215	0.657498
-102.35	17.68	21.8623	7.99868	3.73036	12.0173	0.473017
-8.37	43.36	20.4506	7.74431	3.10409	11.0749	0.404334
-158	22.75	23.1605	8.34809	4.38901	13.0925	0.541752
-36.76	43.25	25.4058	9.17538	5.61444	15.2881	0.660718
-36.08	-30.08	24.4437	8.79045	5.0856	14.3087	0.610899
-158	22.75	24.3505	8.75543	5.0343	14.2164	0.605936
-158	22.75	25.7505	9.32249	5.80122	15.6472	0.67766
-33.12	-14.9	27.5634	10.1512	6.7109	17.5343	0.753082
-158	22.75	25.0405	9.02452	5.4144	14.9115	0.642176
-43.42	-30.3	23.6594	8.50944	4.65645	13.55	0.568737
-21.81	29.5	27.1005	9.93316	6.49479	17.0595	0.736543
-158	22.75	24.2405	8.71462	4.9738	14.1081	0.600055
-158	22.75	24.1305	8.67442	4.9134	14.0006	0.594155
-46.62	-33.39	21.6395	7.94959	3.62445	11.8518	0.461651
-19.76	44.61	23.9846	8.62207	4.83348	13.8593	0.586303
-46.38	42.46	25.1644	9.07508	5.48243	15.0387	0.648526
-158	22.75	25.2105	9.09406	5.50771	15.0862	0.650874
-158	22.75	24.0505	8.64558	4.86955	13.9229	0.589853
-158	22.75	26.3405	9.5835	6.11352	16.2659	0.705063
-8.4	43.39	20.3306	7.729	3.05619	11.0069	0.398918
-158	22.75	25.8705	9.37468	5.8656	15.7728	0.683409
-158	22.75	25.3505	9.15221	5.58429	15.2308	0.657949
-37.87	-24.35	25.6669	9.28641	5.75614	15.5598	0.673606
-37.87	-24.35	25.6569	9.28211	5.75074	15.5494	0.673119
-8.32	43.42	17.4678	7.65844	2.20913	9.99635	0.29611
-21.53	44.48	23.9691	8.61658	4.82502	13.8444	0.58547
-36.08	-30.08	19.1837	7.63326	2.64632	10.4595	0.351282
-21.81	29.5	27.0805	9.92381	6.48515	17.0388	0.73578
-37.87	-24.35	25.6669	9.28641	5.75614	15.5598	0.673606
-33.12	-14.9	27.5434	10.1417	6.70187	17.514	0.752414
-35.77	-30.67	17.7126	7.6429	2.25799	10.0362	0.302695
-29.73	43.83	25.2987	9.13061	5.556	15.1772	0.655342
-14.05	43.92	22.3675	8.12205	3.97895	12.4142	0.499346
-158	22.75	23.0005	8.29941	4.30461	12.9506	0.533126
-158	22.75	27.7505	10.24	6.79398	17.7231	0.759106
-30	49.44	20.269	7.72152	3.03195	10.9728	0.396167
-158	22.75	24.0205	8.63485	4.85312	13.8939	0.588238
-46.62	-33.39	21.1295	7.84971	3.39152	11.496	0.436312
-49.81	-36.06	22.2842	8.10059	3.93724	12.3468	0.494962
-158	22.75	25.4005	9.17317	5.61157	15.2826	0.660455
-105	15.77	28.6013	10.6448	7.13418	18.5493	0.780949
-158	22.75	24.0205	8.63485	4.85312	13.8939	0.588238
-57.89	-51.93	7.76484	9.82461	2.93416	12.7674	0.326684
-43.42	-30.3	23.6494	8.50607	4.65104	13.5406	0.568196
-158	22.75	24.5505	8.83114	5.14447	14.4152	0.616568
-31.53	43.68	25.2955	9.12926	5.55423	15.1739	0.655178
-158	22.75	23.0205	8.30541	4.31512	12.9682	0.534203
-26.66	44.07	24.8047	8.93011	5.2846	14.6712	0.629942
-34.84	-31.37	16.611	7.74236	2.07387	9.92398	0.276583
-158	22.75	24.6205	8.8581	5.18306	14.4854	0.620268
-57.89	-51.93	7.65484	9.83948	2.94785	12.7956	0.328181
-158	22.75	23.1305	8.33885	4.37313	13.0657	0.540133
-158	22.75	23.2605	8.37929	4.44213	13.1825	0.547154
-102.35	17.68	24.6523	8.8704	5.20056	14.5173	0.621942
-46.62	-33.39	21.2895	7.87915	3.46311	11.6041	0.444151
-35.77	-30.67	24.2726	8.72645	4.99142	14.1396	0.601771
-158	22.75	25.3405	9.14803	5.57883	15.2205	0.657446
-21.81	29.5	27.1105	9.93784	6.4996	17.0699	0.736924
-158	22.75	24.6605	8.8736	5.20512	14.5256	0.622377
-158	22.75	25.0405	9.02452	5.4144	14.9115	0.642176
-158	22.75	24.1605	8.68533	4.92986	14.0298	0.595766
-53.3	-39.35	20.534	7.75554	3.13792	11.1233	0.408143
-158	22.75	23.7705	8.54728	4.71673	13.6547	0.574746
-38.15	43.15	25.4333	9.18697	5.62944	15.3167	0.662093
-158	22.75	26.9005	9.83998	6.39732	16.8519	0.728743
-102.35	17.68	24.0923	8.66059	4.89242	13.9634	0.592098
-158	22.75	24.0205	8.63485	4.85312	13.8939	0.588238
-158	22.75	24.6405	8.86584	5.19409	14.5054	0.621323
-158	22.75	22.3605	8.12024	3.97544	12.4085	0.498978
-158	22.75	23.6705	8.51319	4.66246	13.5604	0.569337
-35.05	-18.86	25.8025	9.34505	5.82917	15.7016	0.680162
-158	22.75	26.7105	9.75216	6.3027	16.6536	0.720997
-53.3	-39.35	20.544	7.75692	3.142	11.1291	0.408602
-158	22.75	25.1105	9.053	5.45286	14.9833	0.645771
-158	22.75	23.4905	8.45323	4.56526	13.3927	0.559596
-158	22.75	24.5805	8.84267	5.16101	14.4452	0.618155
-158	22.75	24.5505	8.83114	5.14447	14.4152	0.616568
-158	22.75	22.4305	8.13859	4.01071	12.4657	0.502676
-158	22.75	24.8005	8.92845	5.28229	14.6669	0.629723
-158	22.75	24.4205	8.78171	5.07284	14.2857	0.609667
-158	22.75	27.7505	10.24	6.79398	17.7231	0.759106
-20.01	38.17	24.8546	8.94987	5.31207	14.7218	0.632544
-158	22.75	24.2805	8.72939	4.99579	14.1474	0.602196
-57.89	-51.93	7.72484	9.83013	2.93922	12.7778	0.327234
-158	22.75	24.2205	8.70727	4.96281	14.0885	0.598984
-19.82	35.87	25.4799	9.20663	5.65478	15.365	0.664409
-158	22.75	27.7505	10.24	6.79398	17.7231	0.759106
-158	22.75	30.0405	11.31	7.52617	19.7598	0.792193
-36.2	-31.05	17.78	7.6393	2.27226	10.0487	0.304587
-158	22.75	23.5905	8.48632	4.61918	13.4855	0.565008
-158	22.75	23.9305	8.60294	4.80391	13.8073	0.583387
-158	22.75	24.5605	8.83498	5.14999	14.4252	0.617097
-30	45.36	19.6567	7.66164	2.80455	10.6626	0.36998
-158	22.75	24.3605	8.75917	5.03981	14.2263	0.606469
-158	22.75	23.2505	8.37614	4.43681	13.1734	0.546614
-105	15.77	27.4813	10.1123	6.67364	17.4508	0.750315
-158	22.75	22.8805	8.2639	4.24182	12.8458	0.526674
-158	22.75	24.0205	8.63485	4.85312	13.8939	0.588238
-105	15.77	28.9013	10.7867	7.23707	18.8244	0.786204
-36.08	-30.08	19.0737	7.62889	2.61178	10.4169	0.347138
-8.32	43.42	18.0778	7.62696	2.33936	10.1118	0.313338
-158	22.75	25.4005	9.17317	5.61157	15.2826	0.660455
-158	22.75	23.8505	8.57494	4.76027	13.7308	0.579068
-158	22.75	24.0505	8.64558	4.86955	13.9229	0.589853
-158	22.75	22.8605	8.25806	4.2314	12.8284	0.5256
-158	22.75	23.9505	8.60999	4.81484	13.8265	0.584465
-158	22.75	23.1205	8.33578	4.36784	13.0568	0.539593
-158	22.75	24.2505	8.71831	4.9793	14.1179	0.60059
-158	22.75	23.9905	8.62417	4.83671	13.8649	0.586622
-158	22.75	21.5305	7.92678	3.57354	11.773	0.456153
-49.81	-36.06	22.2942	8.10315	3.94223	12.3548	0.495488
-158	22.75	22.8805	8.2639	4.24182	12.8458	0.526674
[truncated: 32 more rows]

## Sheet: early 21stc
longitude	latitude	heterotrophic bacteria (µgC L-1)	autotrophic picoplankton (µgC L-1)	total picoplankton (µgC L-1)	ratio (AP:HB)
[truncated: 1,893 more rows]
